# Supplementary material
Source: PubMed Central journal article supplement (PMC4834640)
Supplement: jm5b01963_si_002.pdf [file jm5b01963_si_002.pdf]

## Supporting Information

### Structure Property Relationships of Carboxylic Acid Isosteres

Pierrick Lassalas,<sup>a</sup> Bryant Gay,<sup>a</sup> Caroline Lasfargeas,<sup>a</sup> Michael J. James,<sup>b</sup> Van Tran,<sup>a</sup> Krishna G. Vijayendran,<sup>a</sup> Kurt R. Brunden,<sup>b</sup> Marisa C. Kozlowski,<sup>a</sup> Craig J. Thomas,<sup>c</sup> Amos B. Smith III,<sup>a</sup> Donna M. Huryn<sup>a,\*</sup> and Carlo Ballatore<sup>a,b,\*</sup>

<sup>a</sup>*Department of Chemistry, School of Arts and Sciences, University of Pennsylvania, 231 South 34<sup>th</sup> St., Philadelphia, PA 19104-6323;* <sup>b</sup>*Center for Neurodegenerative Diseases Research, Institute on Aging, University of Pennsylvania, 3600 Spruce Street, Philadelphia, PA 19104-6323;* <sup>c</sup>*National Center for Advancing Translational Sciences National Institutes of Health, Bethesda, MD 20850, USA*

- S2.** Table S1 – Comparison of plasma protein binding (*f<sub>u</sub>*) of **1**, **25–27** with the corresponding, but more lipophilic congeners that are brominated in the *para* position.  
**S3–5.** Experimental details on solubility, PAMPA assay, and pKa analysis.  
**S6.** Experimental details on logD<sub>7.4</sub> determinations.  
**S7–S8.** Experimental details on the UV-Vis titrations.  
**S9–S90.** NMR spectra of synthesized test compounds and intermediates **42**, **43**, **47**, **48**, **50–53**  
**S91–S257.** X-ray reports for compounds **1–3**, **5**, **6**, **8**, **10–20**, **22**, **26**, **28**, **32**, **35**, **36**.

**Table S1.** Comparison of plasma protein binding (*fu*) of **1**, **25–27** with the corresponding, but more lipophilic congeners that are brominated in the *para* position.

| <i>Compound Structure</i>                                                           | <i>logD</i> <sub>7.4</sub> | <i>Fu, AVG</i> | <i>SD</i> | <i>%CV</i> | <i>Control</i> |
|-------------------------------------------------------------------------------------|----------------------------|----------------|-----------|------------|----------------|
| 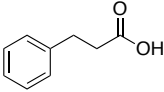   | - 0.29                     | 9.5%           | 0.004     | 5          | 0.98           |
|    | 0.01 <sup>†</sup>          | BLD            | NA        | NA         | 1.09           |
|    | - 0.70                     | 8.0%           | 0.3       | 4          | 1.03           |
|    | - 0.42 <sup>†</sup>        | 0.4%           | 0.09      | 22         | 1.02           |
|    | - 0.60                     | 14%            | 0.6       | 4          | 1.01           |
|   | - 0.19 <sup>†</sup>        | 4.6%           | 0.1       | 3          | 1.01           |
|  | - 0.33                     | 11.1%          | 0.1       | 1          | 0.97           |
|  | 0.11 <sup>†</sup>          | 0.06%          | 0.04      | 6          | 1.01           |

<sup>†</sup> Literature value (Ballatore C., *et al.*, *J. Med. Chem.* **2011**, *54*, 6969); BLD = below limit of detection. NA = not applicable

**Experimental Details on Solubility, PAMPA Assay and pKa Analysis:** these determinations were carried out by Analiza Inc. (Cleveland, OH).

*Solubility and PAMPA Assay Media Preparation:* 1X Phosphate Buffered Saline, pH 7.4: 10X PBS (Fisher Bioreagent part number BP399-500) 50 mL were added to approximately 450 mL HPLC grade H<sub>2</sub>O. The volume of the solution was then adjusted to 500 mL for a total dilution factor of 1:10 and a final PBS concentration of 1X. The pH of the final solution was measured and found to be 7.4.

*PAMPA Assay Setup:* The 10 mM DMSO solutions were diluted 50 fold with 1X-PBS, pH 7.4, for a dose concentration of 200  $\mu$ M in a volume of 300  $\mu$ L in the Donor compartment of the BD Gentest Pre-coated PAMPA plate. After preparation of the Donor plate, any precipitation was noted. The Acceptor compartment was filled with 200  $\mu$ L of 1X-PBS, pH 7.4. After careful assembly of the PAMPA plate, it was left to incubate for 5 h in the dark at ambient temperature (22.3–25.4 °C). A sister plate was created using the same 10 mM DMSO solutions by diluting 50-fold with 1X-PBS, pH 7.4 directly in a Millipore solubility filter plate to measure the initial concentration of the sample in buffer (C<sub>0</sub>). After the 5 h incubation was complete, the PAMPA plate was disassembled and the C<sub>0</sub> plate was vacuum filtered. The Acceptor, Donor and C<sub>0</sub> wells for compounds dosed at 200  $\mu$ M were diluted 20-fold with a 50:50 mixture of mobile phase components (0.1% Formic Acid in H<sub>2</sub>O: 0.1% Formic Acid in CH<sub>3</sub>CN or 0.1% NH<sub>4</sub>OH in H<sub>2</sub>O: Neat CH<sub>3</sub>CN). The dilutions were transferred from the Donor, Acceptor and C<sub>0</sub> plates to 96-well plates for analysis by LC-MS QTOF.

*Preparation of Calibrators for HPLC-MS Analysis:* 5  $\mu$ L of the previously prepared 10 mM DMSO stock solution was diluted with 245  $\mu$ L of a 50:50 mixture of mobile phase components (0.1% Formic Acid in H<sub>2</sub>O: 0.1% Formic Acid in CH<sub>3</sub>CN or 0.1% NH<sub>4</sub>OH in H<sub>2</sub>O: Neat CH<sub>3</sub>CN ) directly in a polypropylene 96 well. Each sample was then serially diluted with of 50:50 mobile phase components (0.1% Formic Acid in H<sub>2</sub>O: 0.1% Formic Acid in CH<sub>3</sub>CN or 0.1% NH<sub>4</sub>OH in H<sub>2</sub>O: Neat CH<sub>3</sub>CN) to concentrations spanning the assay range. To mimic assay conditions with regards to % DMSO, the calibrators were further diluted 20-fold with 50:50 mobile phase components. A standard calibration curve was prepared for each compound from these dilutions.

*Analysis by HPLC-MS:* An Agilent 1100 HPLC (binary HPLC pump, column compartment, and diode array detector) coupled with a CTC HTC-PAL autosampler was used to inject filtrate (2.5  $\mu$ L or 7.5  $\mu$ L) onto the column (AQUASIL C18, 5  $\mu$ M 50 $\times$ 2.1mm) and eluted using an appropriate gradient program. TOF-MS data was acquired using an Agilent 6538 Ultra High Accuracy TOF MS in extended dynamic range (m/z 100–3200) using appropriate MS conditions. Following data acquisition, exact mass extraction and peak integration were performed using MassHunter Software (Agilent Technologies). The prepared Acceptor, Donor and C<sub>0</sub> plates were quantified with respect to the previously prepared calibration curve.

*PAMPA Analysis and Calculation of Effective Permeability (P<sub>e</sub>):* The concentration values from the Donor and Acceptor compartment were used in the calculation of the

effective permeability ( $P_e$ ) of the compound. A mass balance equation was used to calculate the amount of compound retained in the membrane (%R). A high %R indicates either that the compound was bound to the PAMPA membrane, or that the compound was precipitating in the donor compartment. The equations for permeability and membrane retention are shown below.  $C_0$  was determined experimentally, instead of assuming the full solubility of the compound.

$$P_e = \frac{-\ln(1 - C_A(t)/C_{eq})}{A \times \left(\frac{1}{V_D} + \frac{1}{V_A}\right) \times t}$$

$$R = 1 - \left(\frac{C_D(t) \times V_D + C_A(t) \times V_A}{C_0 \times V_D}\right)$$

$$C_{eq} = \frac{C_D(t) \times V_D + C_A(t) \times V_A}{V_D + V_A}$$

$C_A(t)$  = compound concentration in acceptor well at time t (mM)

$C_D(t)$  = compound concentration in donor well at time t (mM)

$C_0$  = initial compound concentration in donor well (mM)

$V_D$  = donor well volume = 0.3 mL

$V_A$  = acceptor well volume = 0.2 mL

$A$  = filter area = 0.3 cm<sup>2</sup>

$t$  = incubation time = 5 h = 18000 s

$R$  = membrane retention

$C_{eq}$  = compound concentration at equilibrium

### **pKa Analysis:**

*Sample Preparation:* The test compounds were first assayed with the aqueous method. For this method, the 10 mM DMSO stock solutions were diluted 100 fold with 10 mM NaOH for a final compound concentration of 100  $\mu$ M and 1% DMSO. The compounds were then transferred into 24 consecutive wells of a 96 well PCR plate for analysis with the aqueous method. Ten compounds gave high quality data in the aqueous method. The remaining compounds were subsequently assayed with the co-solvent method. In this method, the dry powder stocks were dissolved in a media consisting of 60% methanol, 2 mM NaOH and 0.1% DMSO. The final compound concentration in this media was 2 mM. The compounds were transferred into 24 consecutive wells of a 96 well plate for analysis using the co-solvent method. Twenty-one compounds yielded adequate data under the co-solvent method to extrapolate a pKa value.

*Analysis:* All data was obtained using a pKa PRO Analyzer (AATI, Ames, IA). For the aqueous method, an electrophoretic separation was performed in parallel across 24 different pH values, providing a direct measure of overall compound charge vs. pH. The compounds were detected by UV at 228 nm. The average pH spacing between buffer points was 0.4 pH units covering a typical pH range of 1.7–11.2. The co-solvent method was suitable for analysis of compounds possessing low aqueous solubility (typically a

predicted intrinsic solubility of  $< 10 \mu\text{g/ml}$ ). The average pH spacing between buffer points was 0.4 pH units covering a pH range of 1.7–11.2. The compounds were detected by UV at 214 nm. Four consecutive CE runs were performed for each compound starting with 60% co-solvent buffers and decreasing to 30% co-solvent buffers. Norfloxacin was used as a daily performance-indicating standard.

*Calculation of Results:* The total number of pKa values was predicted by relating mobility and compound molecular weight using pKa Estimator® software (AATI, Ames, IA).

#### **Kinetic Solubility Analysis:**

*Kinetic Solubility from DMSO Stocks:* Dilutions (50-fold) of each compound were prepared in assay media by combining 6  $\mu\text{L}$  aliquots of DMSO stocks with 294  $\mu\text{L}$  of assay media directly in a Millipore solubility filter plate with 0.45  $\mu\text{M}$  polycarbonate filter membrane. The samples were prepared in duplicate. Assuming 10 mM stock concentration, the maximum theoretical compound concentration was 200  $\mu\text{M}$  and the final DMSO concentration was 2.0%. The filter plate was sealed. Following 24 h incubation at ambient temperature, (22.3–25.4°C) the samples were vacuum filtered. Filtrates for HPLC-MS were diluted 50 fold with 50:50 mobile phase components (0.1% Formic Acid in  $\text{H}_2\text{O}$ : 0.1% Formic Acid in  $\text{CH}_3\text{CN}$  or 0.1%  $\text{NH}_4\text{OH}$  in  $\text{H}_2\text{O}$ : Neat  $\text{CH}_3\text{CN}$ ) and the resulting plate was sealed with a pierceable heat seal for analysis.

*Preparation of Calibrators for HPLC-MS Analysis:* 5  $\mu\text{L}$  of the previously prepared 10 mM DMSO stock solution was diluted with 245  $\mu\text{L}$  of a 50:50 mixture of mobile phase components (0.1% Formic Acid in  $\text{H}_2\text{O}$ : 0.1% Formic Acid in  $\text{CH}_3\text{CN}$  or 0.1%  $\text{NH}_4\text{OH}$  in  $\text{H}_2\text{O}$ : Neat  $\text{CH}_3\text{CN}$ ) directly in a polypropylene 96 well. Each sample was then serially diluted with of 50:50 mobile phase components (0.1% Formic Acid in  $\text{H}_2\text{O}$ : 0.1% Formic Acid in  $\text{CH}_3\text{CN}$  or 0.1%  $\text{NH}_4\text{OH}$  in  $\text{H}_2\text{O}$ : Neat  $\text{CH}_3\text{CN}$ ) to concentrations spanning the assay range. To mimic assay conditions with regards to % DMSO, the calibrators were further diluted 20-fold with 50:50 mobile phase components. A standard calibration curve was prepared for each compound from these dilutions.

*Analysis by HPLC-MS:* An Agilent 1100 HPLC (binary HPLC pump, column compartment, and diode array detector) coupled with a CTC HTC-PAL autosampler was used to inject filtrate (2.5  $\mu\text{L}$  or 7.5  $\mu\text{L}$ ) onto the column (AQUASIL C<sub>18</sub>, 5  $\mu\text{M}$  50×2.1mm) and eluted using an appropriate gradient program. TOF-MS data was acquired using an Agilent 6538 Ultra High Accuracy TOF MS in extended dynamic range (m/z 100–3200) using appropriate MS conditions. Following data acquisition, exact mass extraction and peak integration were performed using MassHunter Software (Agilent Technologies). The prepared Acceptor, Donor and C<sub>0</sub> plates were quantified with respect to the previously prepared calibration curve.

### Determination of logD<sub>7.4</sub>

The logD<sub>7.4</sub> values were determined by WuXi Apptec employing a miniaturized 1-octanol/buffer shake flask assay followed by LC/MS/MS analysis. Test compounds (10 mM in DMSO; 2 μL/well) and QC samples (10 mM in DMSO; 2 μL/well) were transferred in duplicate from storage tubes to the 96-well polypropylene cluster tubes. Next, pH 7.4 buffer-saturated 1-octanol (149 μL/well) and 1-octanol saturated buffer (149 μL/well) were added to each well. Each of the tubes was vigorously mixed for 3 minutes and then shaken for 1 hour at a speed of 880 rpm at room temperature. The mixtures were then centrifuged at 2500 rpm for 2 minutes. Dilution of the buffer layer sample by a factor of 20 fold and the 1-octanol layer sample by a factor of 200 with IS solution was made prior to analysis. Sample analysis was performed using a triple quadrupole mass spectrometer. Peak areas were corrected by dilution factors and incorporating internal standard, and the ratio of the corrected peak areas were used to calculate the results (logD<sub>7.4</sub> value). QC samples were used to monitor the assay performance. The logD<sub>7.4</sub> value for each compound was calculated using the following equation:

$$\text{Log } D_{\text{oct/buffer}} = \log \left( \frac{[\text{200 - fold dilution of compound}]_{\text{octanol}} \times 200}{[\text{20 - fold compound}]_{\text{buffer}} \times 20} \right)$$

## UV-Vis Titration Procedure

*General information: CH<sub>2</sub>Cl<sub>2</sub> was distilled from CaH<sub>2</sub> under an inert atmosphere. UV-spectra were recorded on a JASCO V-530 Spectrophotometer with 0.1 nm resolution.*

A 4.44 mM stock solution of pyrazinone sensor in CH<sub>2</sub>Cl<sub>2</sub> was made by charging a volumetric flask with 10 mg of pyrazinone sensor and diluting with CH<sub>2</sub>Cl<sub>2</sub> to a total volume of 10 mL. For each titration, 25 μL of stock solution was diluted to a volume of 2 mL to give a 2.22 × 10<sup>-5</sup> M solution for the titration. A 500 μL quartz cuvette was loaded with 500 μL of this titration solution and the liquid level was marked.

For the carboxylic acid (**1**), a volumetric flask was charged with 35 mg of **1** and CH<sub>2</sub>Cl<sub>2</sub> was added to give a total volume of 2 mL, resulting in a 0.12 M solution (approx. 210 equiv per 20 μL, relative to sensor titration solution).

For the tetrazole (**16**), a volumetric flask was charged with 47 mg of **16** and CH<sub>2</sub>Cl<sub>2</sub> was added to give a total volume of 2 mL, resulting in a 0.13 M solution. For a final solution of 0.034 M (approx. 61 equiv per 20 μL, relative to sensor titration solution), 500 μL of the 0.13 M solution was diluted to 2 mL in a separate volumetric flask.

For each titration, aliquots of 20 to 50 μL of hydrogen bond donor (HBD) solution (**1** or **16**) were added, and for each addition the total solution volume within the cuvette was maintained at 500 μL by evaporation with a stream of dry argon. Before the first aliquot addition and after each addition, a UV-Vis spectrum was obtained from 550 nm to 450 nm and the wavelength of maximum absorbance (λ<sub>max</sub>) recorded. Aliquots were added until no further decrease in λ<sub>max</sub> was observed.

A plot of λ<sub>max</sub> versus equivalents of HBD (**1** or **16**) relative to pyrazinone sensor gave a titration curve. The average of the initial λ<sub>max</sub> (with no HBD present) and the final λ<sub>max</sub> gave λ<sub>max</sub> at the point of equilibrium. The number of equivalents of HBD at this equilibrium point was obtained via linear interpolation between the two nearest points on the titration curve. The following formula was used to provide an equilibrium constant (K<sub>eq</sub>) where x<sub>eq</sub> is the number of equivalents of HBD at the equilibrium point relative to sensor, and [sensor]<sub>total</sub> is 2.22 × 10<sup>-5</sup> M.

$$K_{eq} = \frac{1}{(x_{eq} - 0.5) \times [sensor]_{total}}$$

The K<sub>eq</sub> formula derivation is provided below.

$$K_{eq} = \frac{[sensor \cdot HBD]_{eq}}{[HBD]_{eq} [sensor]_{eq}} = \frac{1}{[HBD]_{eq}}$$

$$K_{eq} = \frac{1}{[HBD]_{total} - [sensor \cdot HBD]_{eq}}$$

$$K_{eq} = \frac{1}{[HBD]_{total} - 0.5[sensor]_{total}}$$

$$K_{eq} = \frac{1}{(x_{eq} - 0.5) * [sensor]_{total}}$$

Titration data for **1** and **16** are provided below.

| <b>HBD</b> | <b><math>\lambda_{\max}</math> (eq) (nm)</b> | <b>Equivalents HBD (eq)</b> | <b><math>K_{\text{eq}}</math></b> |
|------------|----------------------------------------------|-----------------------------|-----------------------------------|
| <b>1</b>   | 491.65                                       | 602                         | 75                                |
| <b>16</b>  | 489.55                                       | 87                          | 521                               |

Carboxylic acid (**1**)

| <b>Amount HBD soln added (<math>\mu\text{L}</math>)</b> | <b>Equivalents HBD</b> | <b><math>\lambda_{\max}</math> (nm)</b> |
|---------------------------------------------------------|------------------------|-----------------------------------------|
| 0                                                       | 0                      | 498                                     |
| 20                                                      | 210                    | 495.4                                   |
| 40                                                      | 420                    | 493.3                                   |
| 60                                                      | 630                    | 491.4                                   |
| 80                                                      | 840                    | 490.1                                   |
| 100                                                     | 1050                   | 489.3                                   |
| 120                                                     | 1260                   | 488.4                                   |
| 150                                                     | 1575                   | 487.3                                   |
| 180                                                     | 1890                   | 486.8                                   |
| 210                                                     | 2205                   | 486.1                                   |
| 250                                                     | 2624                   | 485.9                                   |
| 300                                                     | 3149                   | 485.3                                   |
| 350                                                     | 3674                   | 485.4                                   |

Tetrazole (**16**)

| <b>Amount HBD soln added (<math>\mu\text{L}</math>)</b> | <b>Equivalents HBD</b> | <b><math>\lambda_{\max}</math> (nm)</b> |
|---------------------------------------------------------|------------------------|-----------------------------------------|
| 0                                                       | 0                      | 498.3                                   |
| 20                                                      | 61                     | 491.8                                   |
| 40                                                      | 122                    | 486.6                                   |
| 60                                                      | 182                    | 484.2                                   |
| 80                                                      | 243                    | 483.1                                   |
| 100                                                     | 304                    | 482.4                                   |
| 130                                                     | 395                    | 481.7                                   |
| 160                                                     | 486                    | 481                                     |
| 190                                                     | 577                    | 480.8                                   |
| 230                                                     | 699                    | 480.8                                   |
| 270                                                     | 820                    | 480.1                                   |



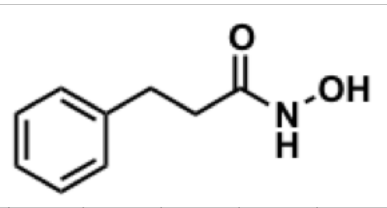

compound 2

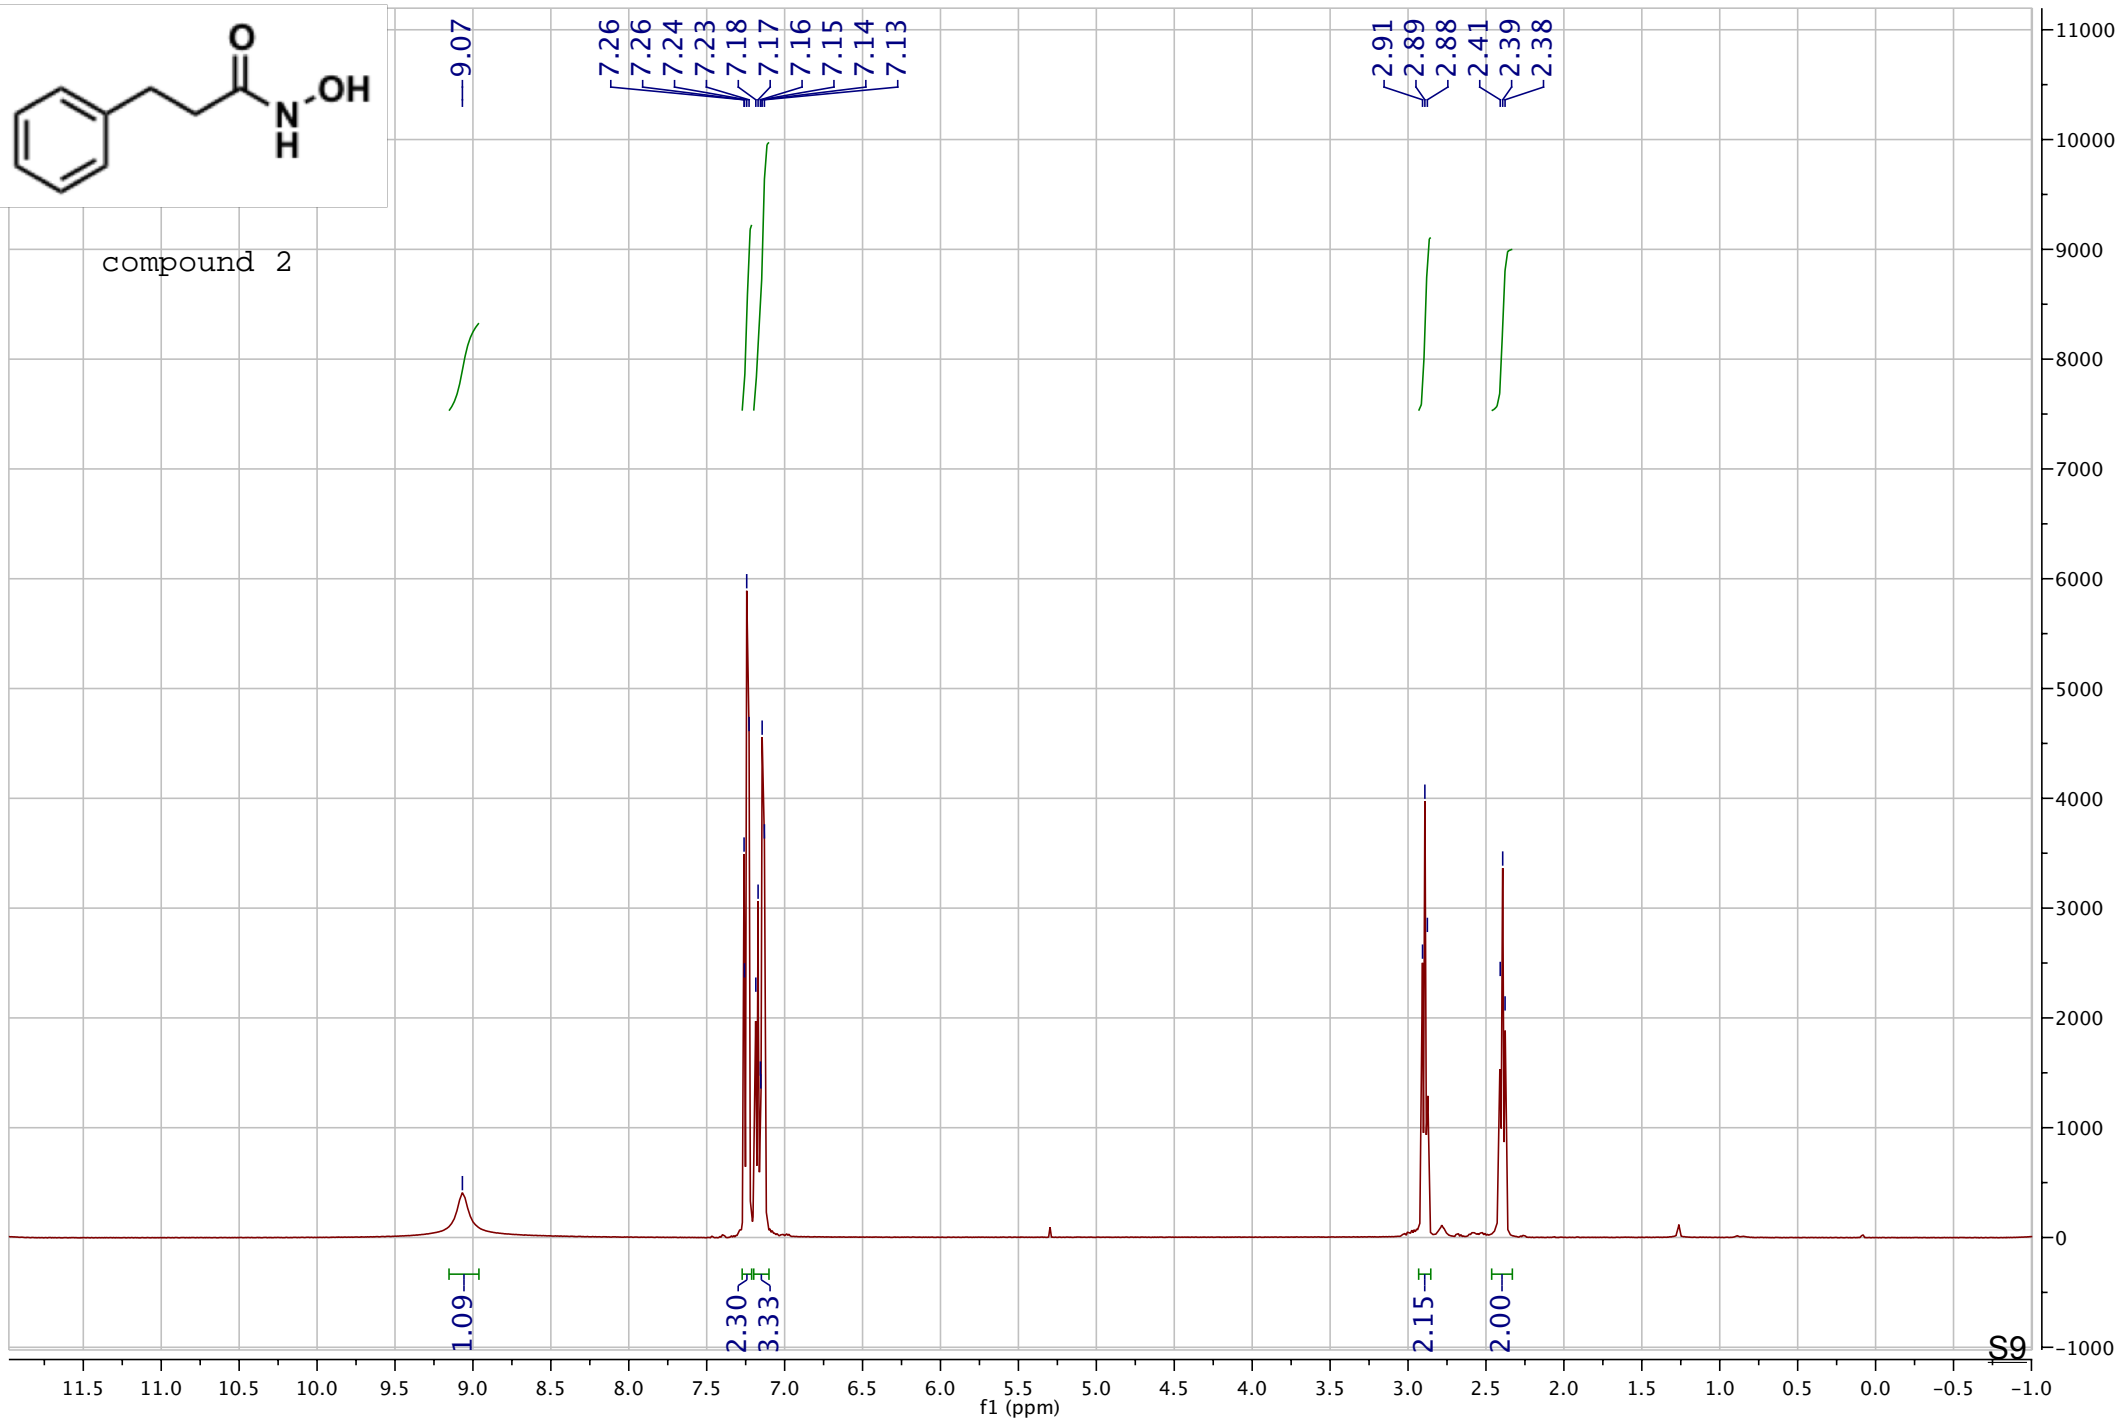

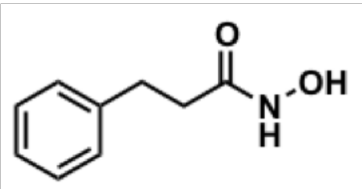

—171.20

—140.23

128.74

128.41

126.57

—34.79

—31.42

compound 2

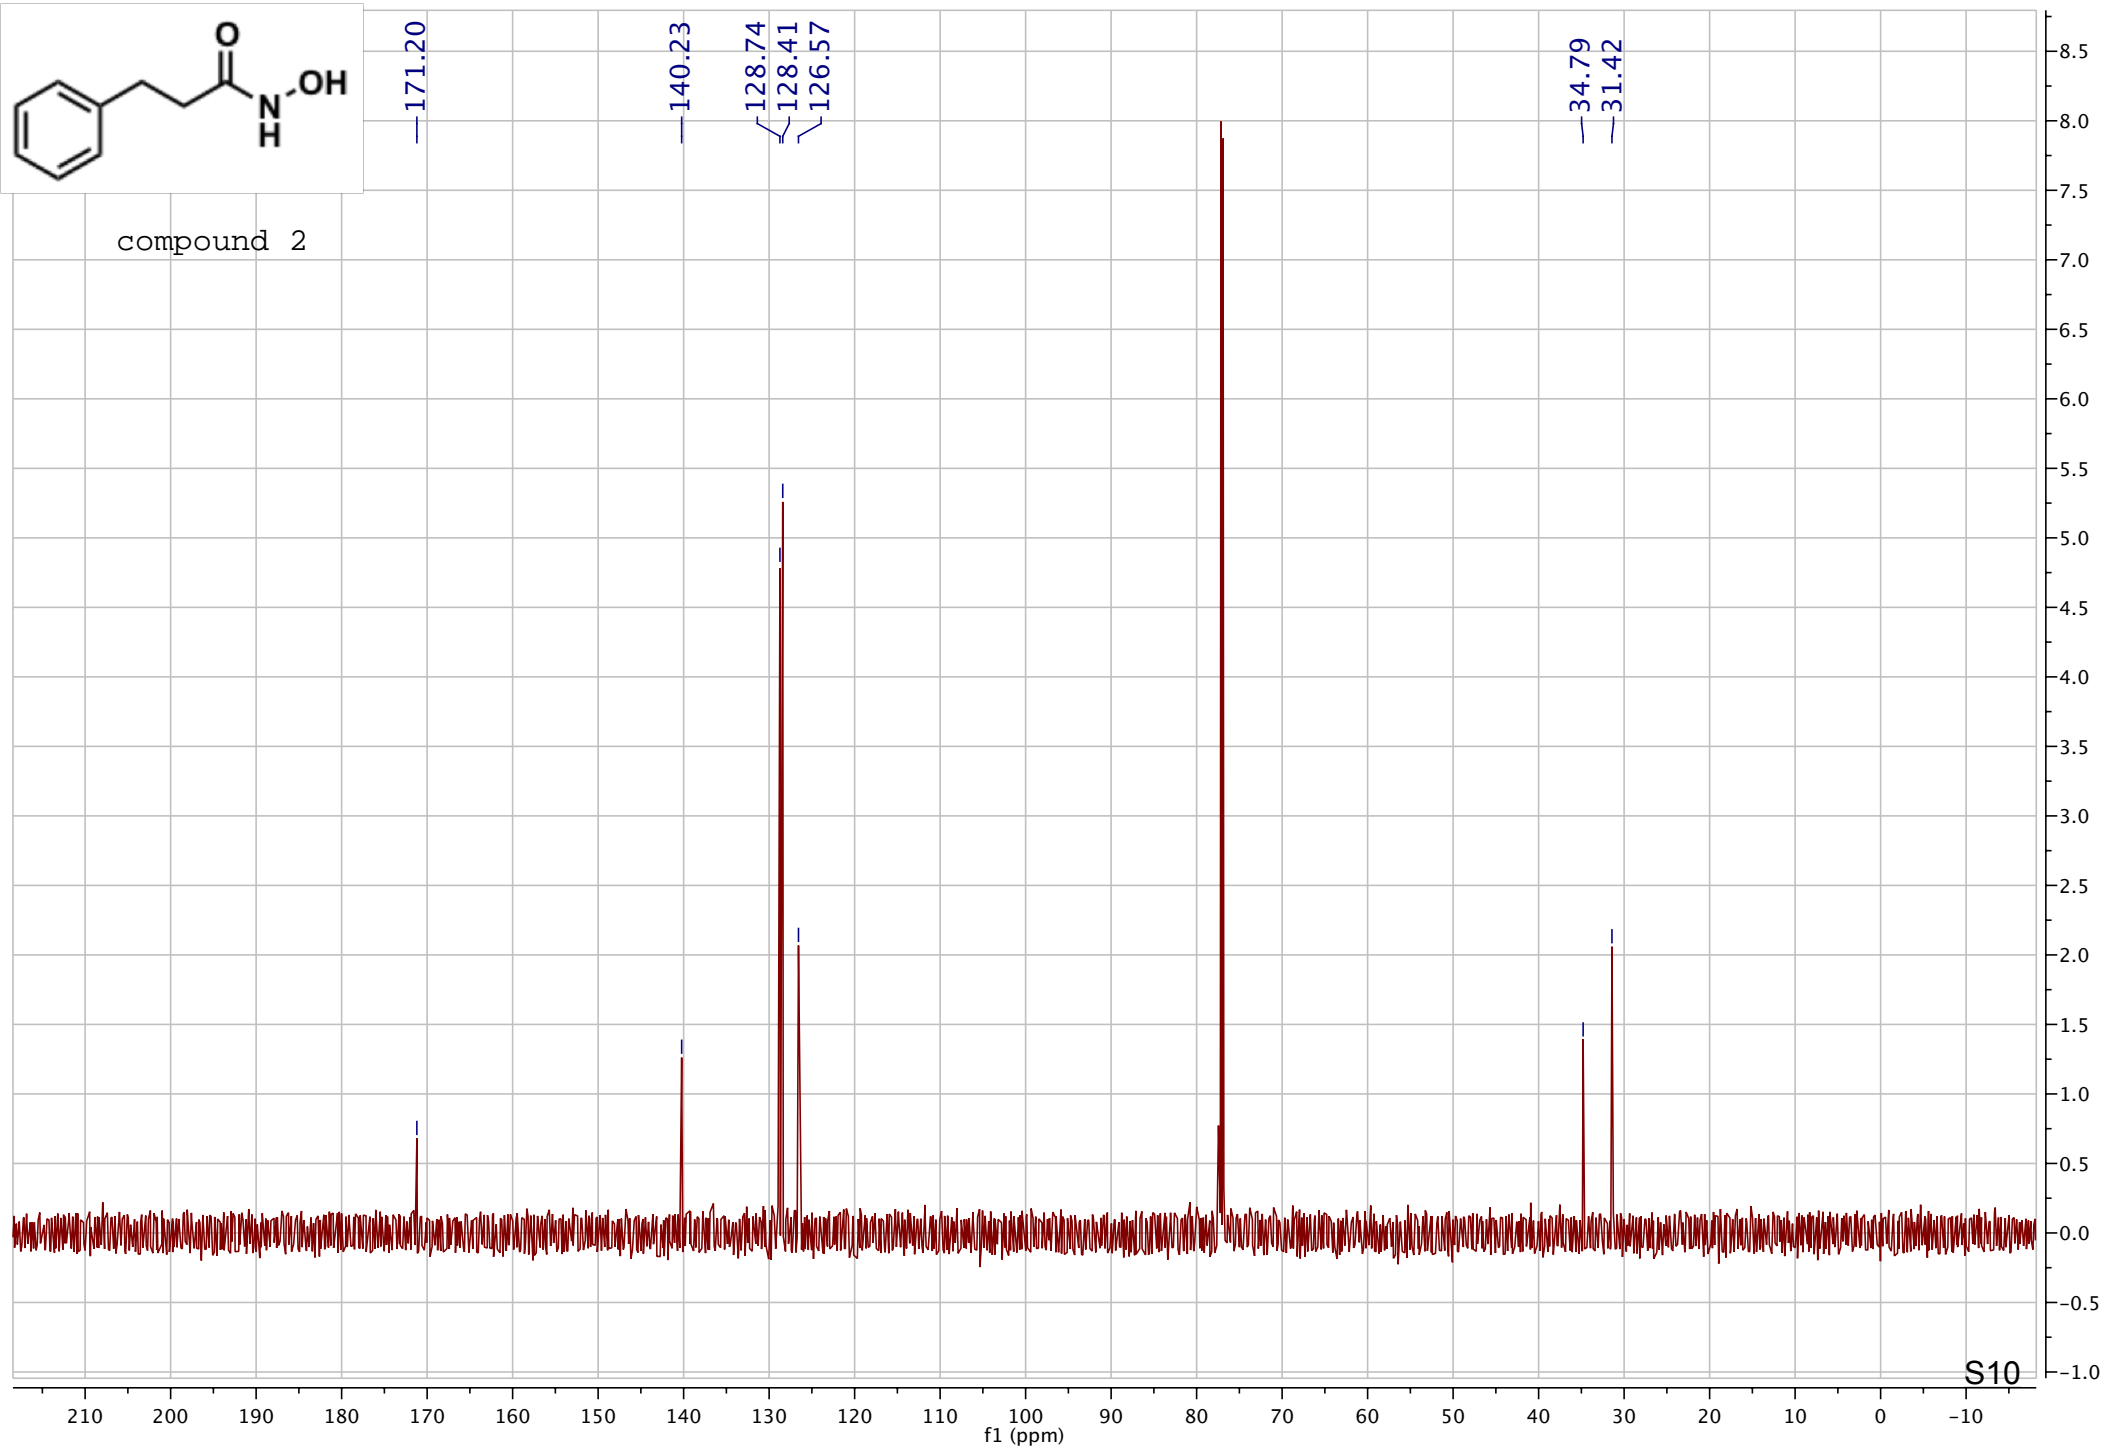

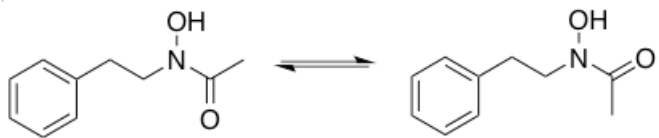

compound 3

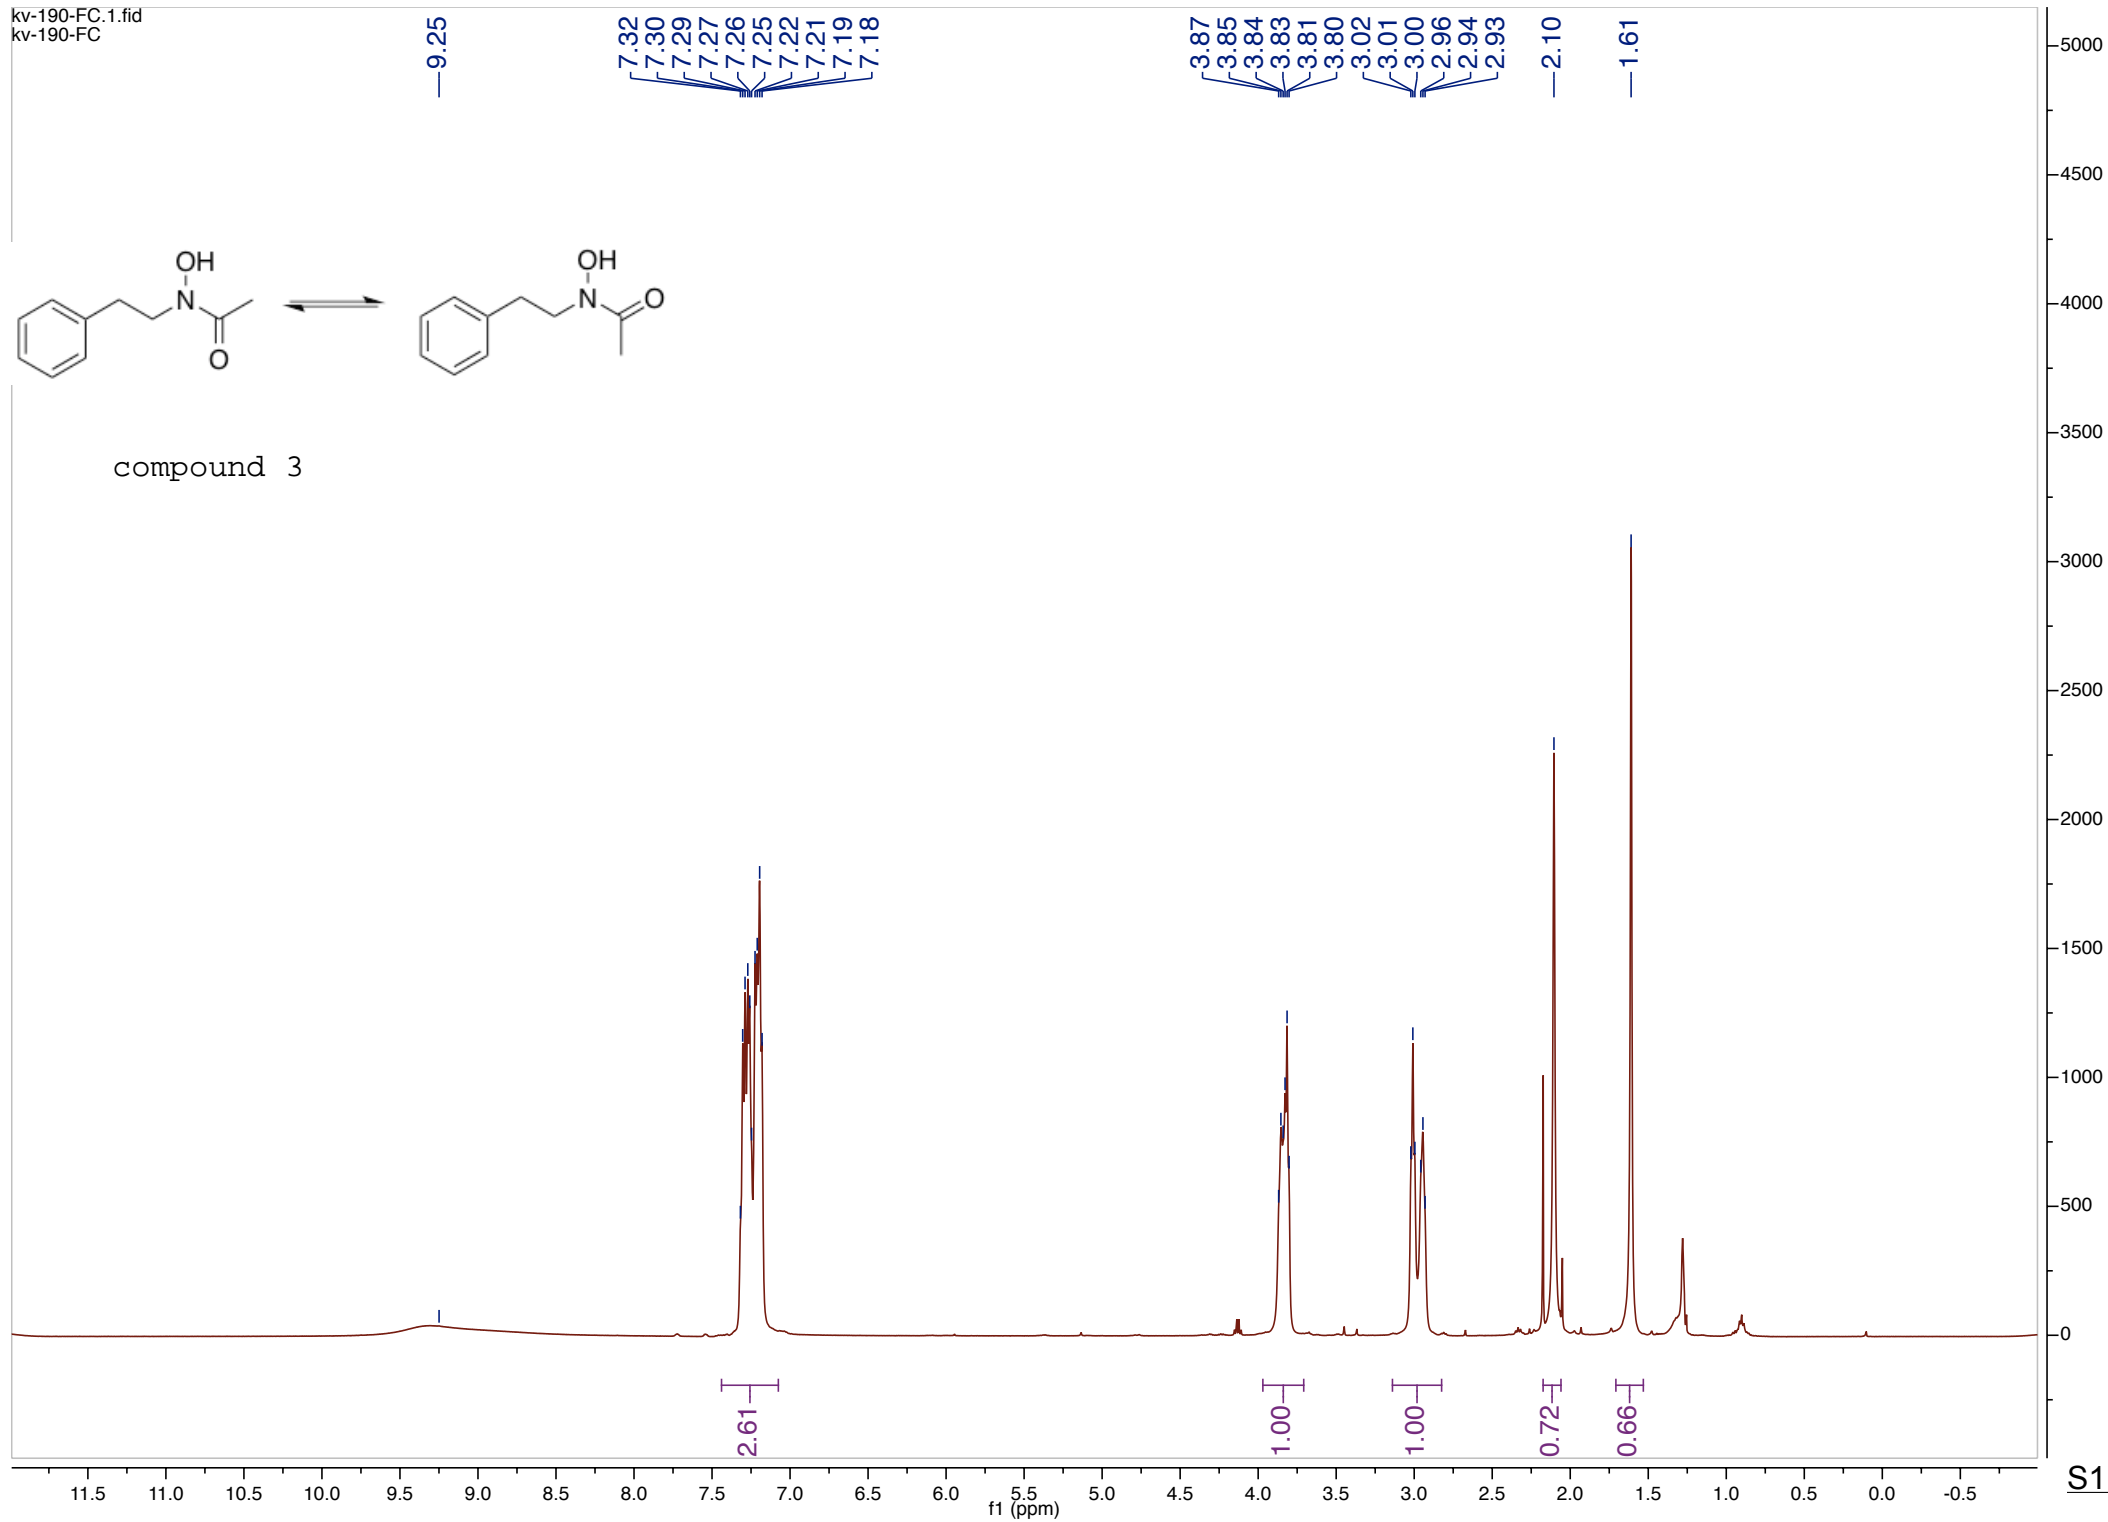

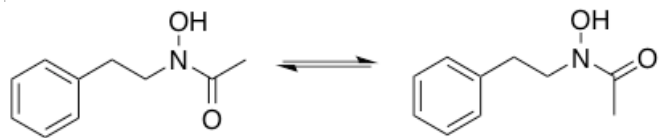

compound 3

172.26  
165.19  
138.74  
138.03  
129.12  
128.90  
128.61  
127.07  
126.53

51.61  
49.65

33.51  
33.07

20.47  
18.36

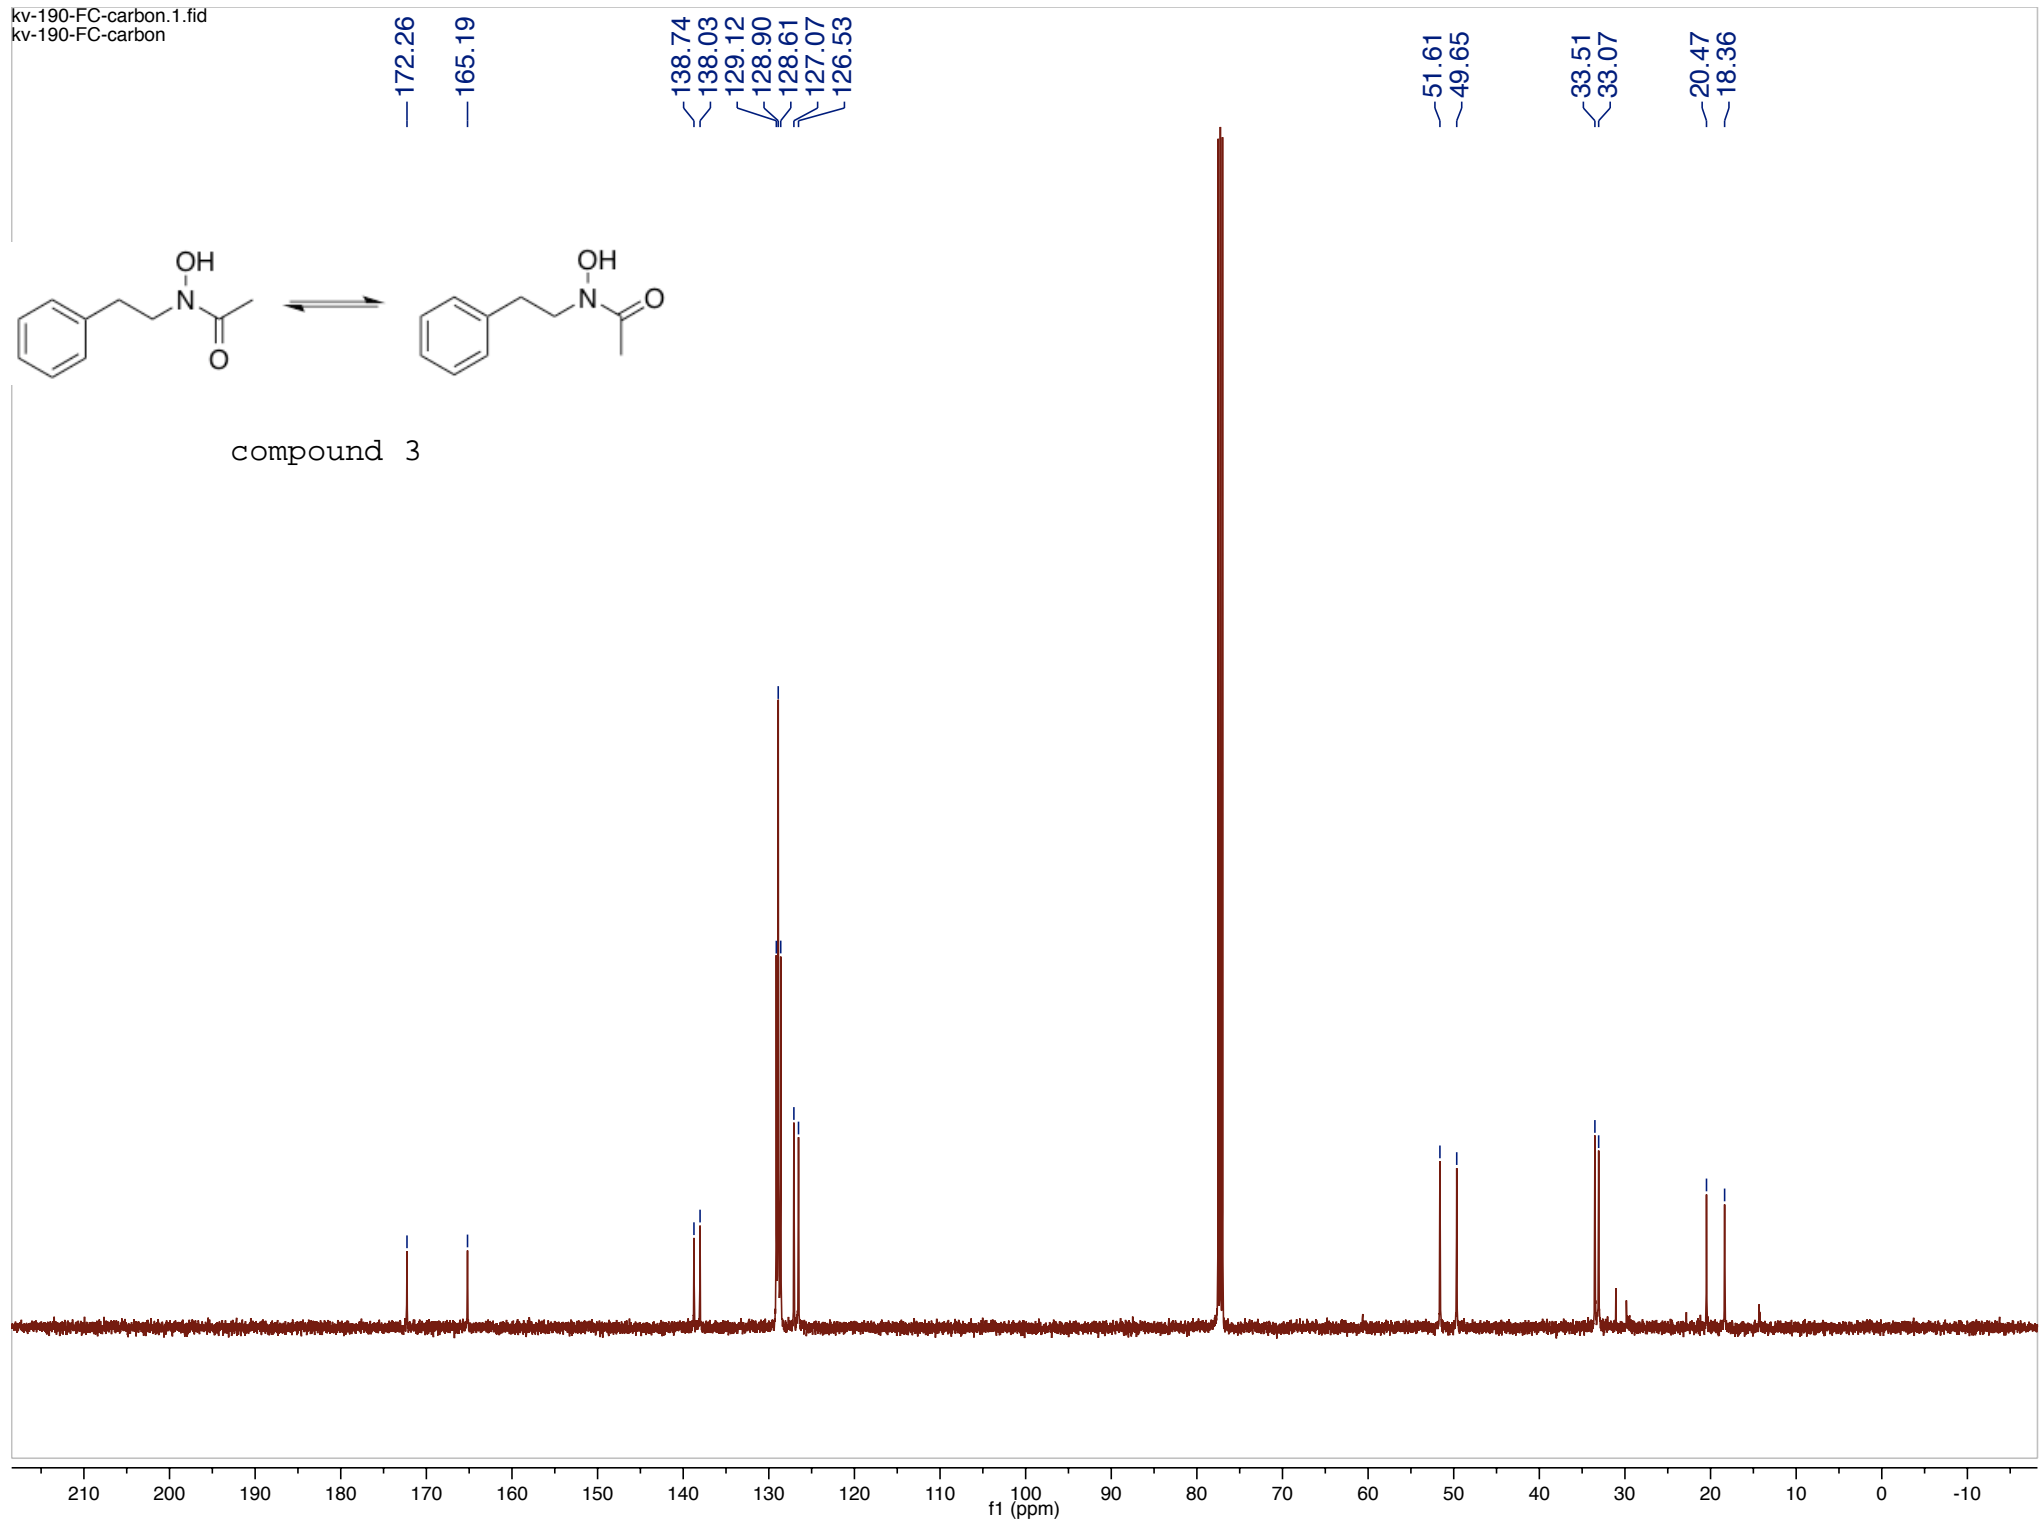

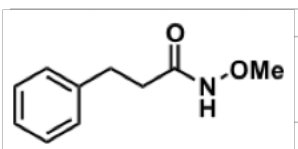

compound 4

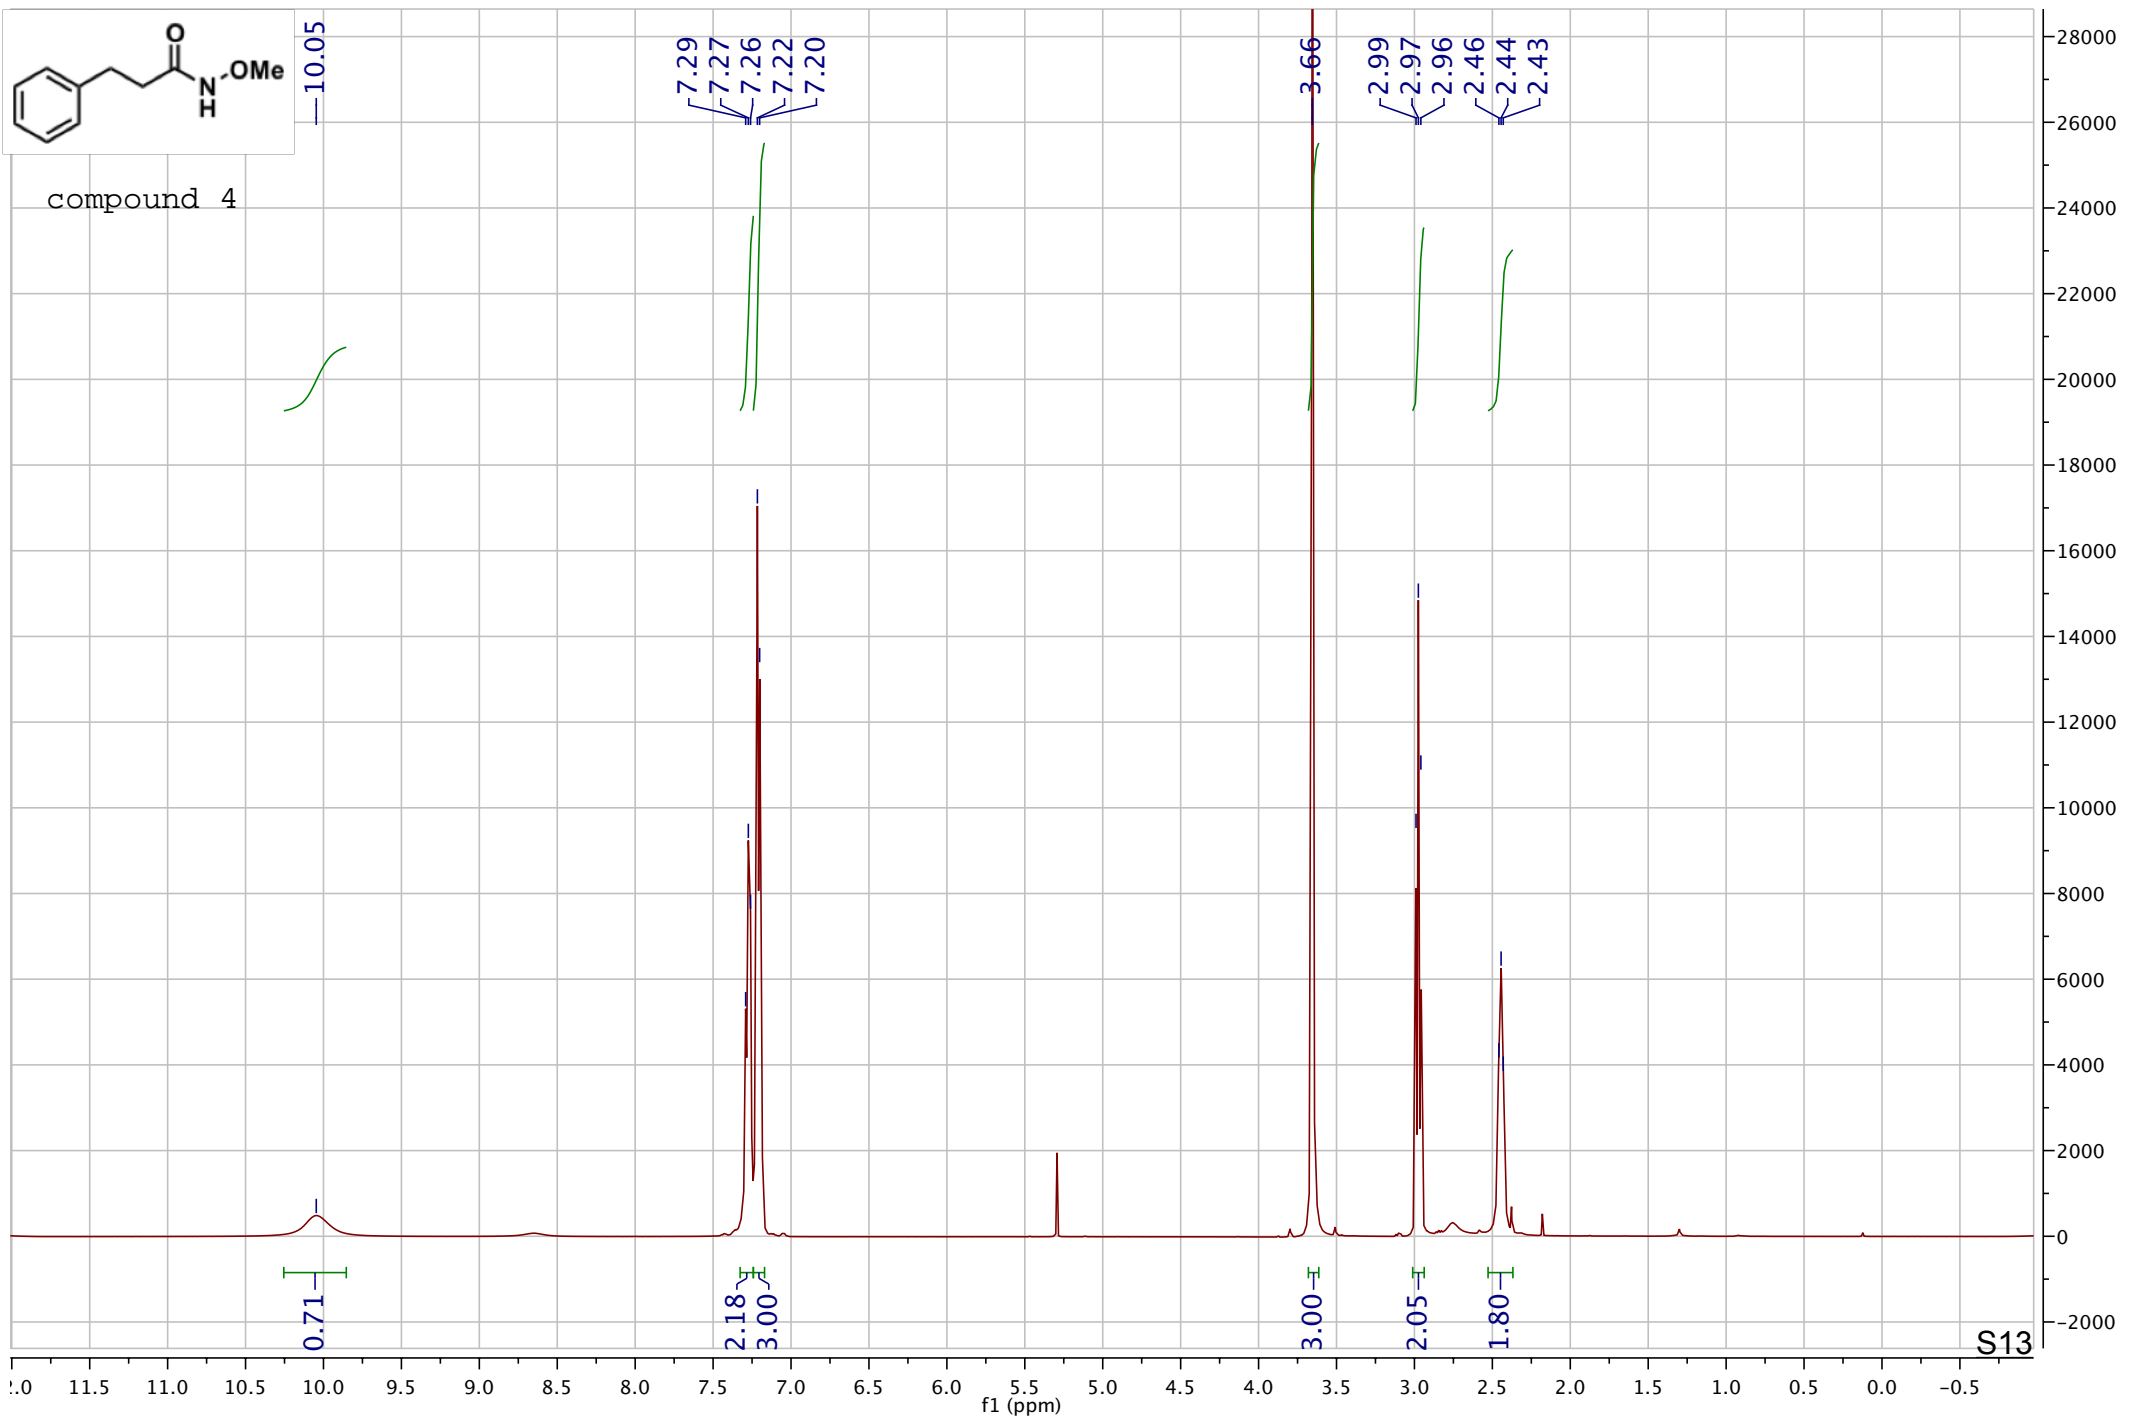

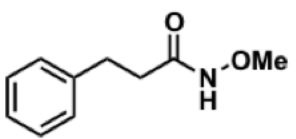

compound 4

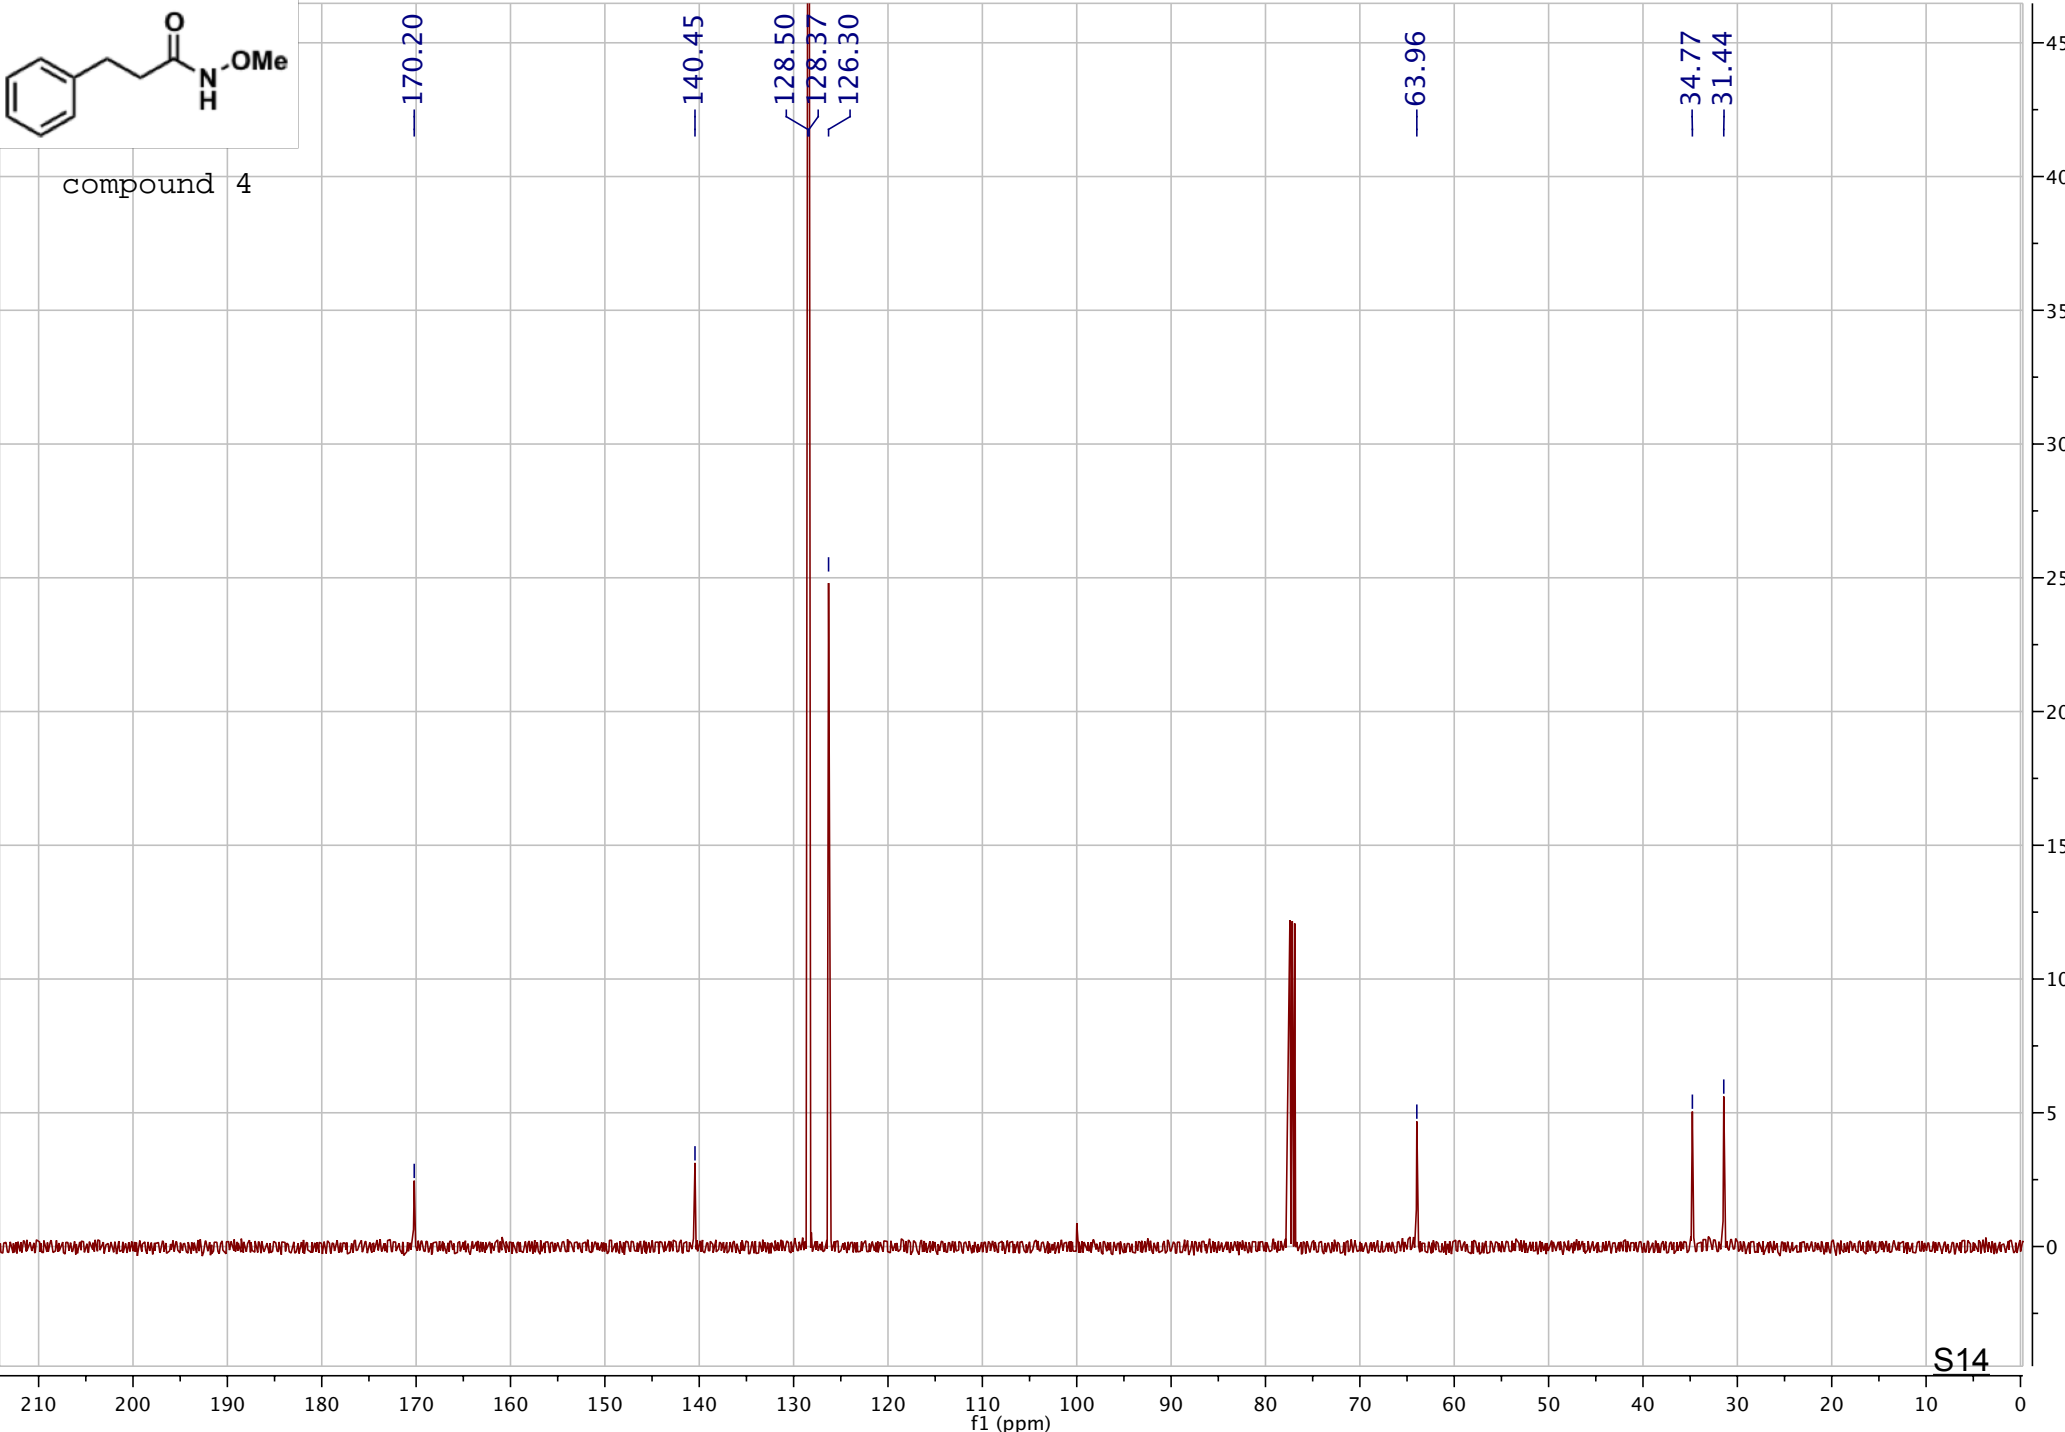

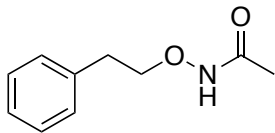

compound 5

7.285  
7.269  
7.254  
7.251  
7.248  
7.235  
7.197  
7.184  
7.174  
7.173  
7.173  
7.170

4.889

4.038  
4.024  
4.010

3.316  
3.313  
3.310  
3.307  
3.304

2.954  
2.940  
2.926

1.850

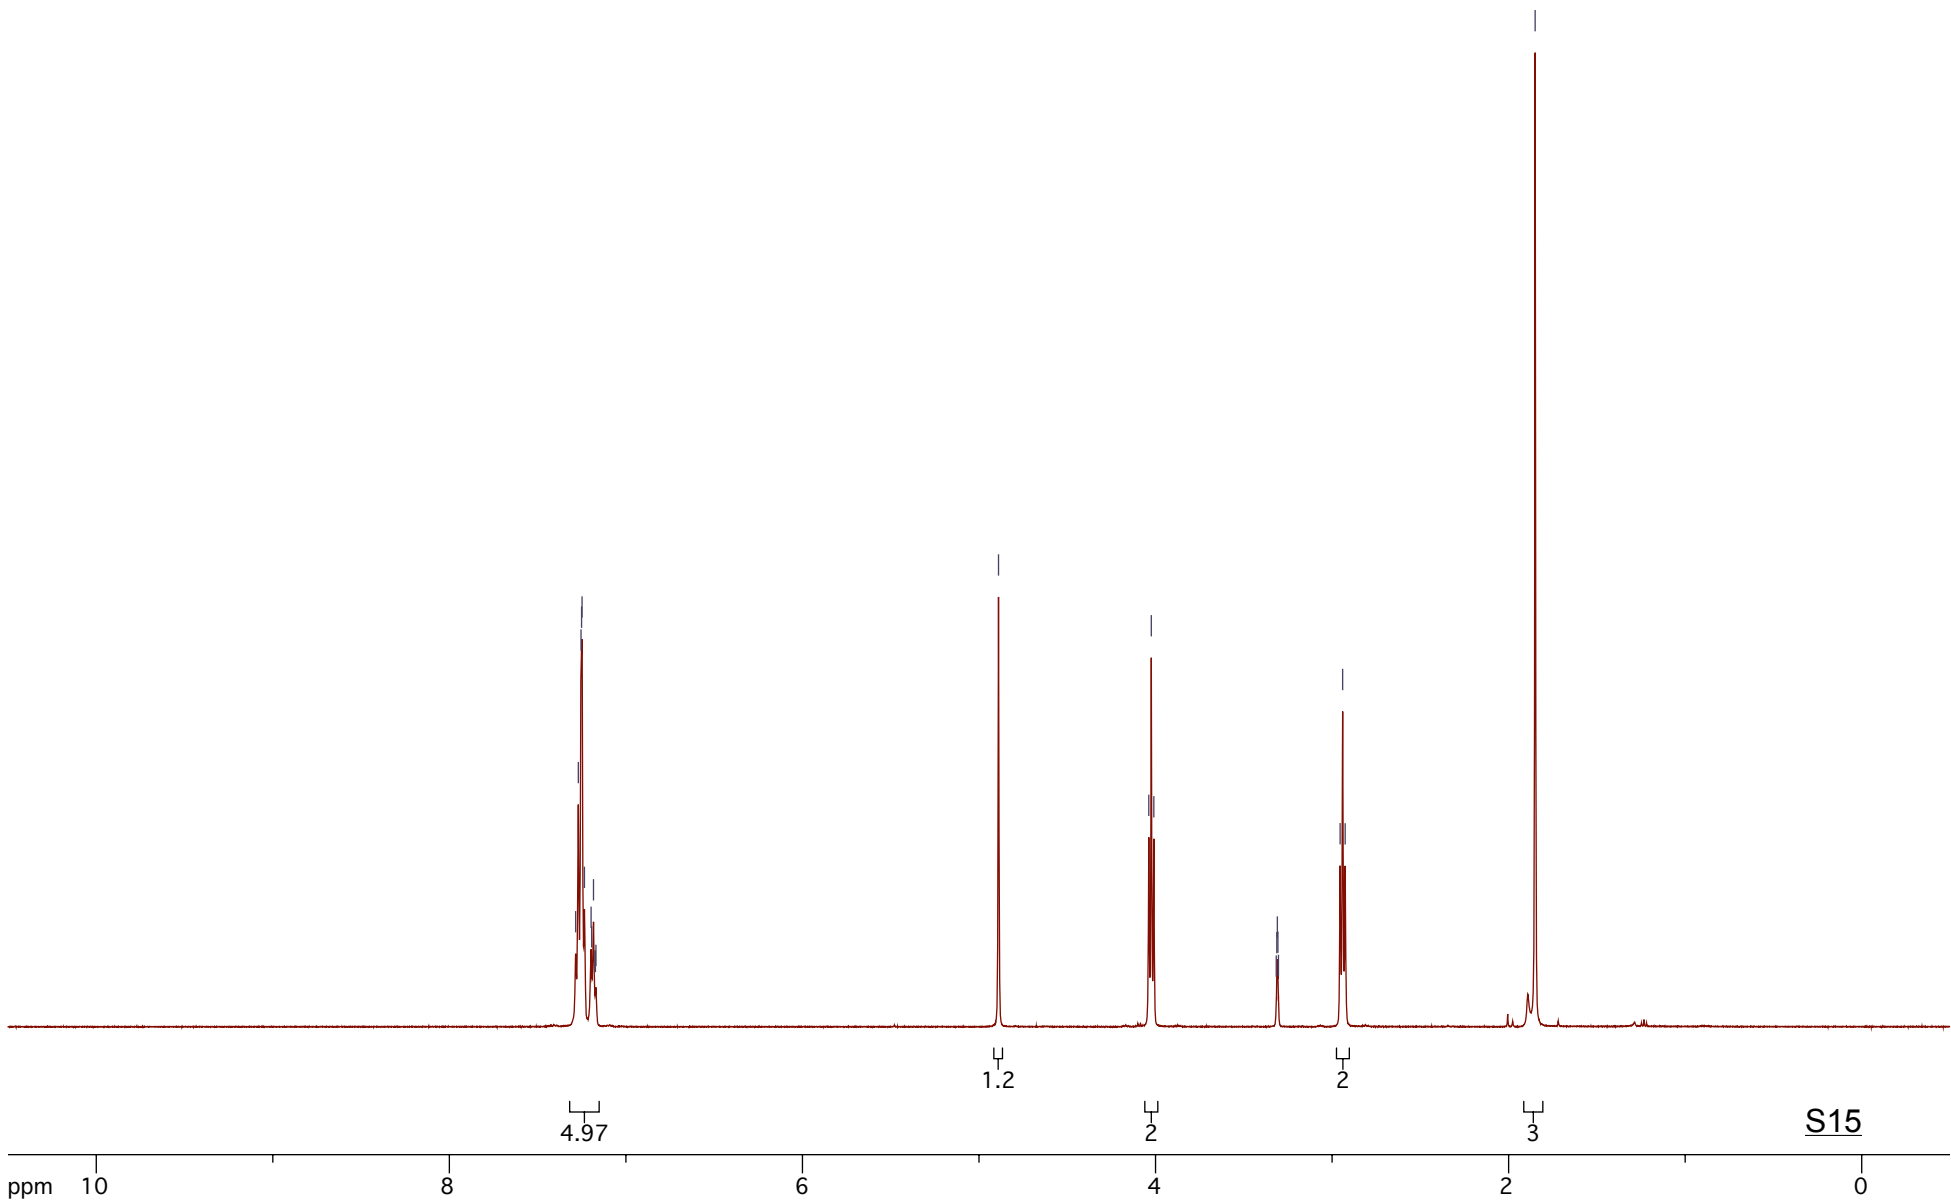

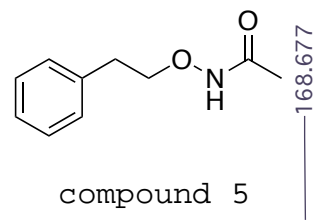

168.677

137.903

128.536

128.055

125.995

76.586

48.125

47.955

47.586

47.273

47.103

34.043

18.042

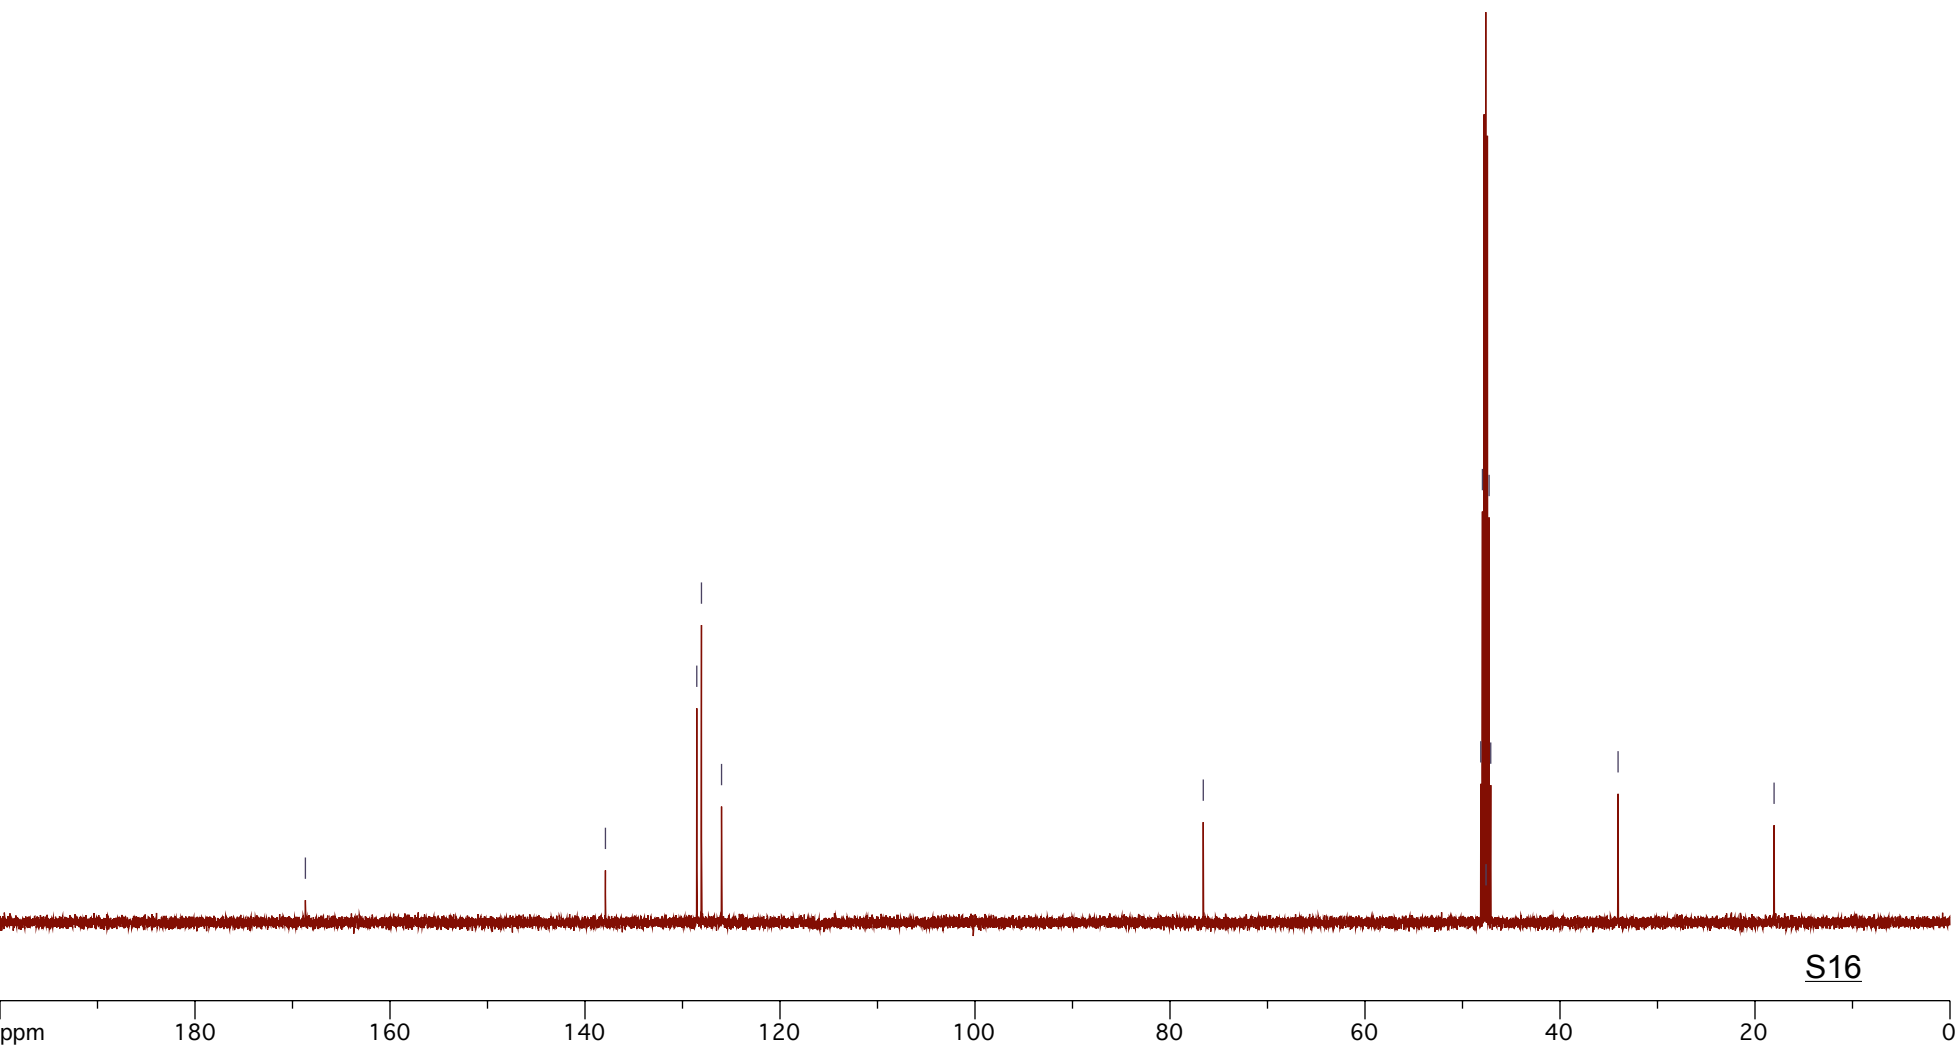



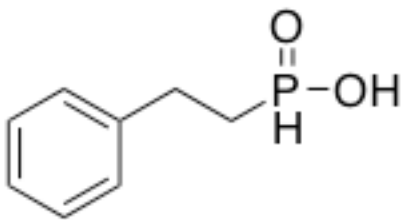

compound 7

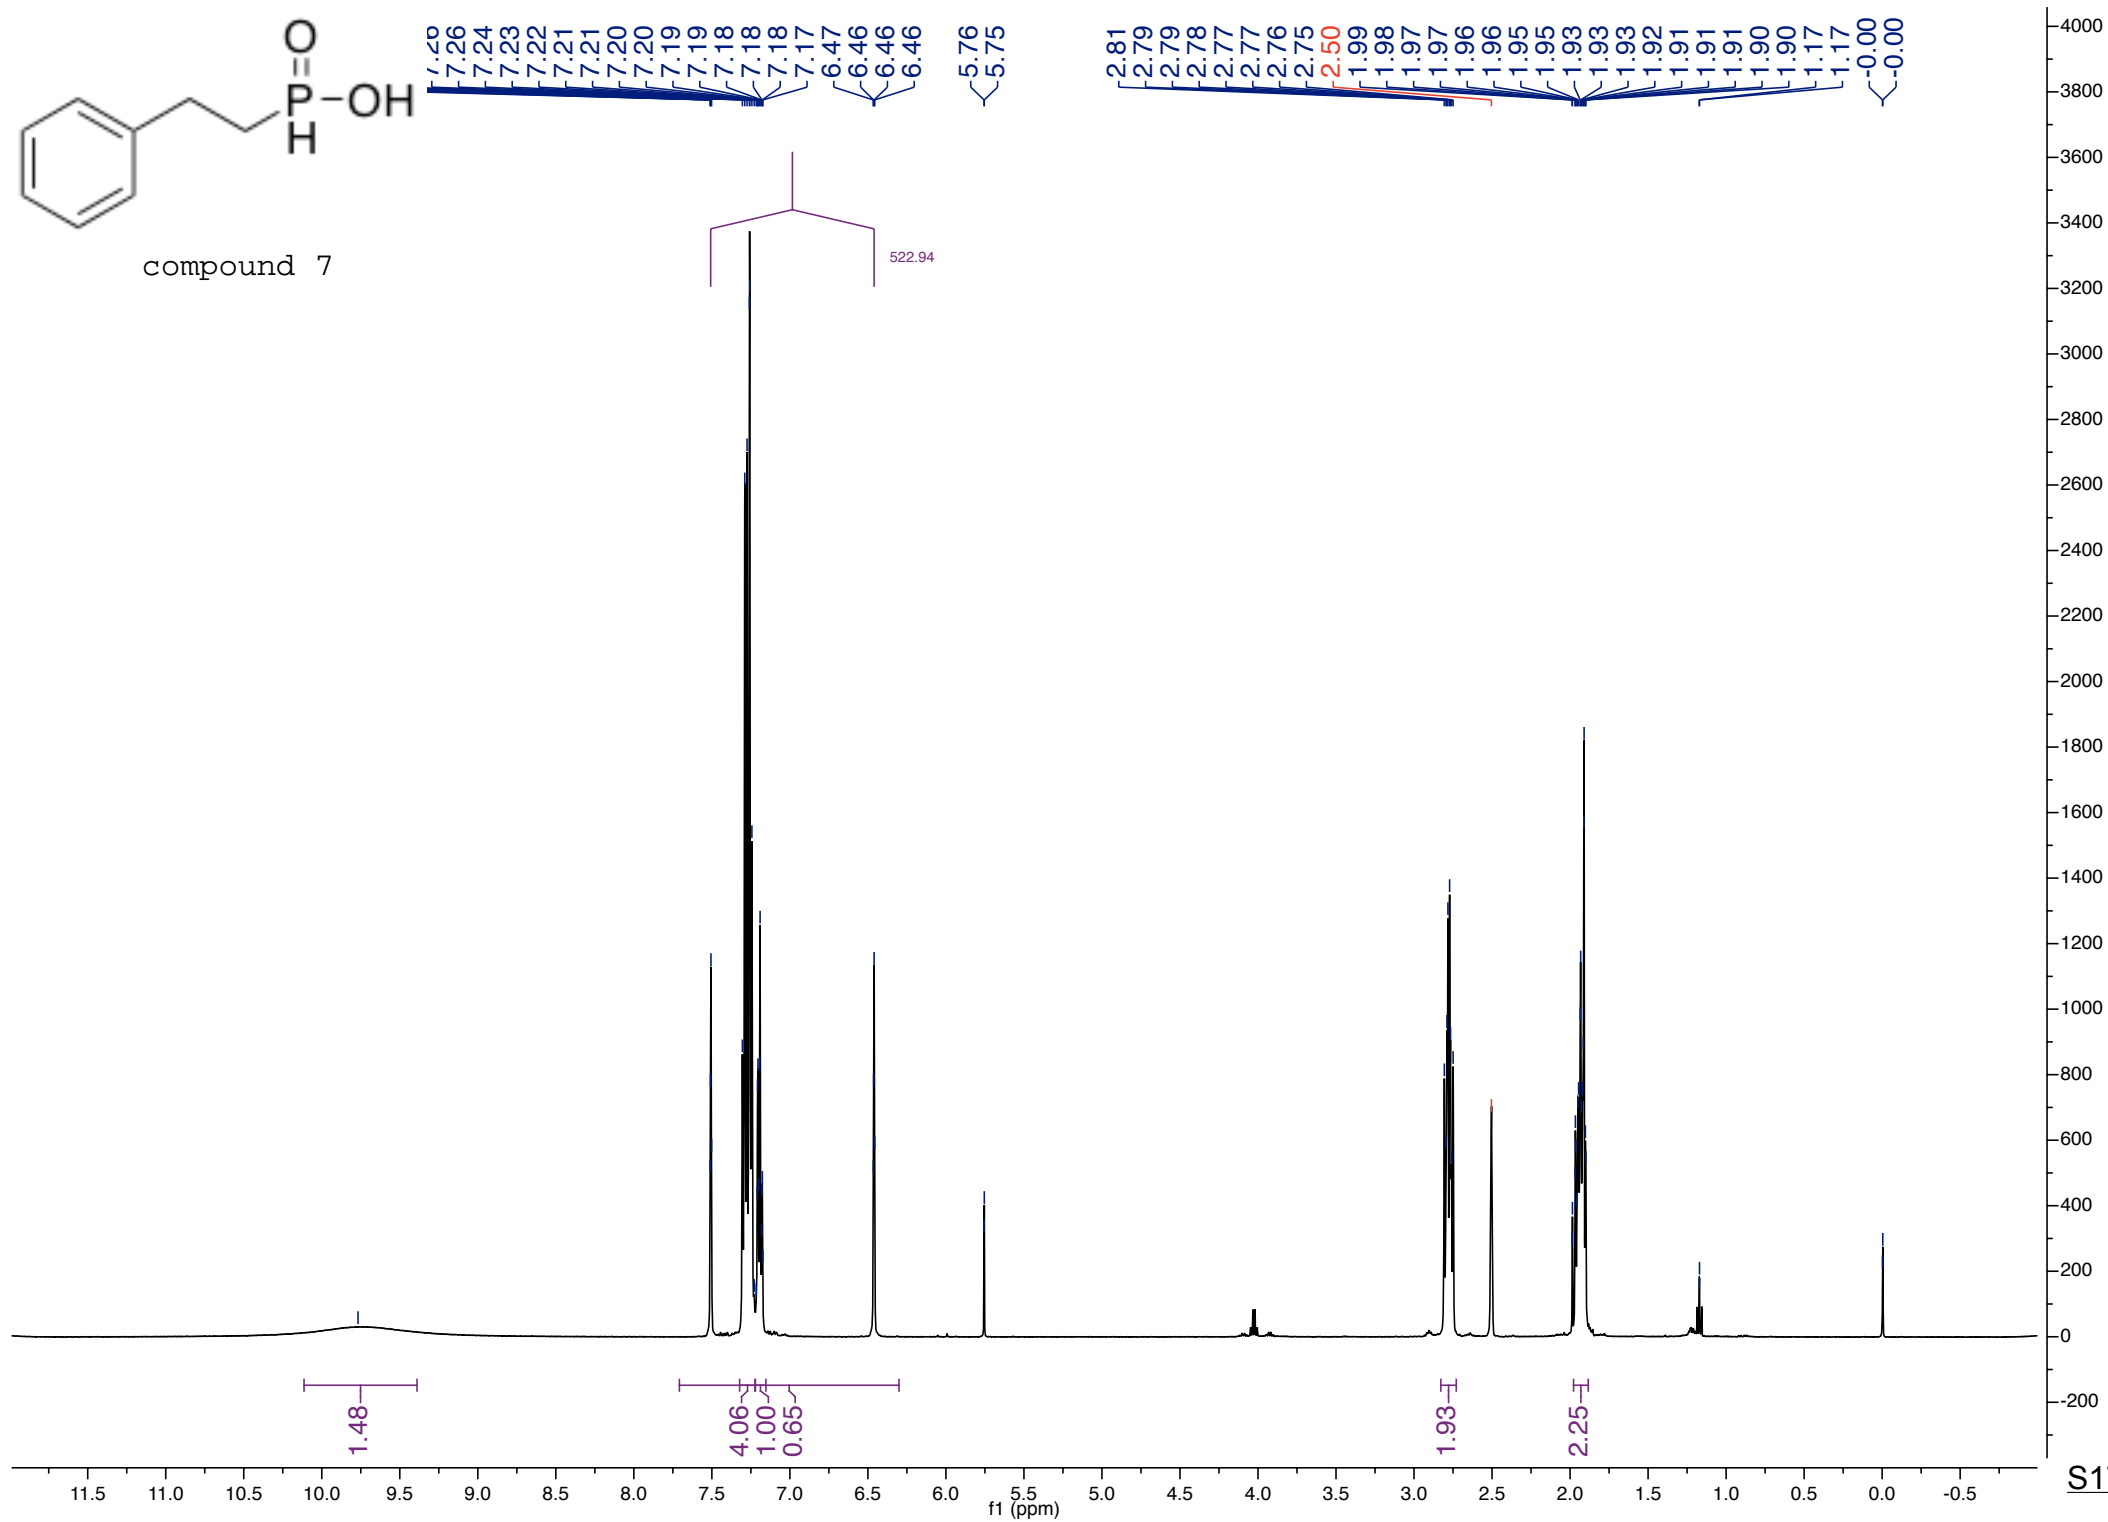



compound 7

141.73  
141.60

129.02  
128.68  
126.68

40.60  
40.43  
40.27  
40.19  
40.10  
40.01  
39.93  
39.77  
39.60  
32.29  
31.58  
27.34

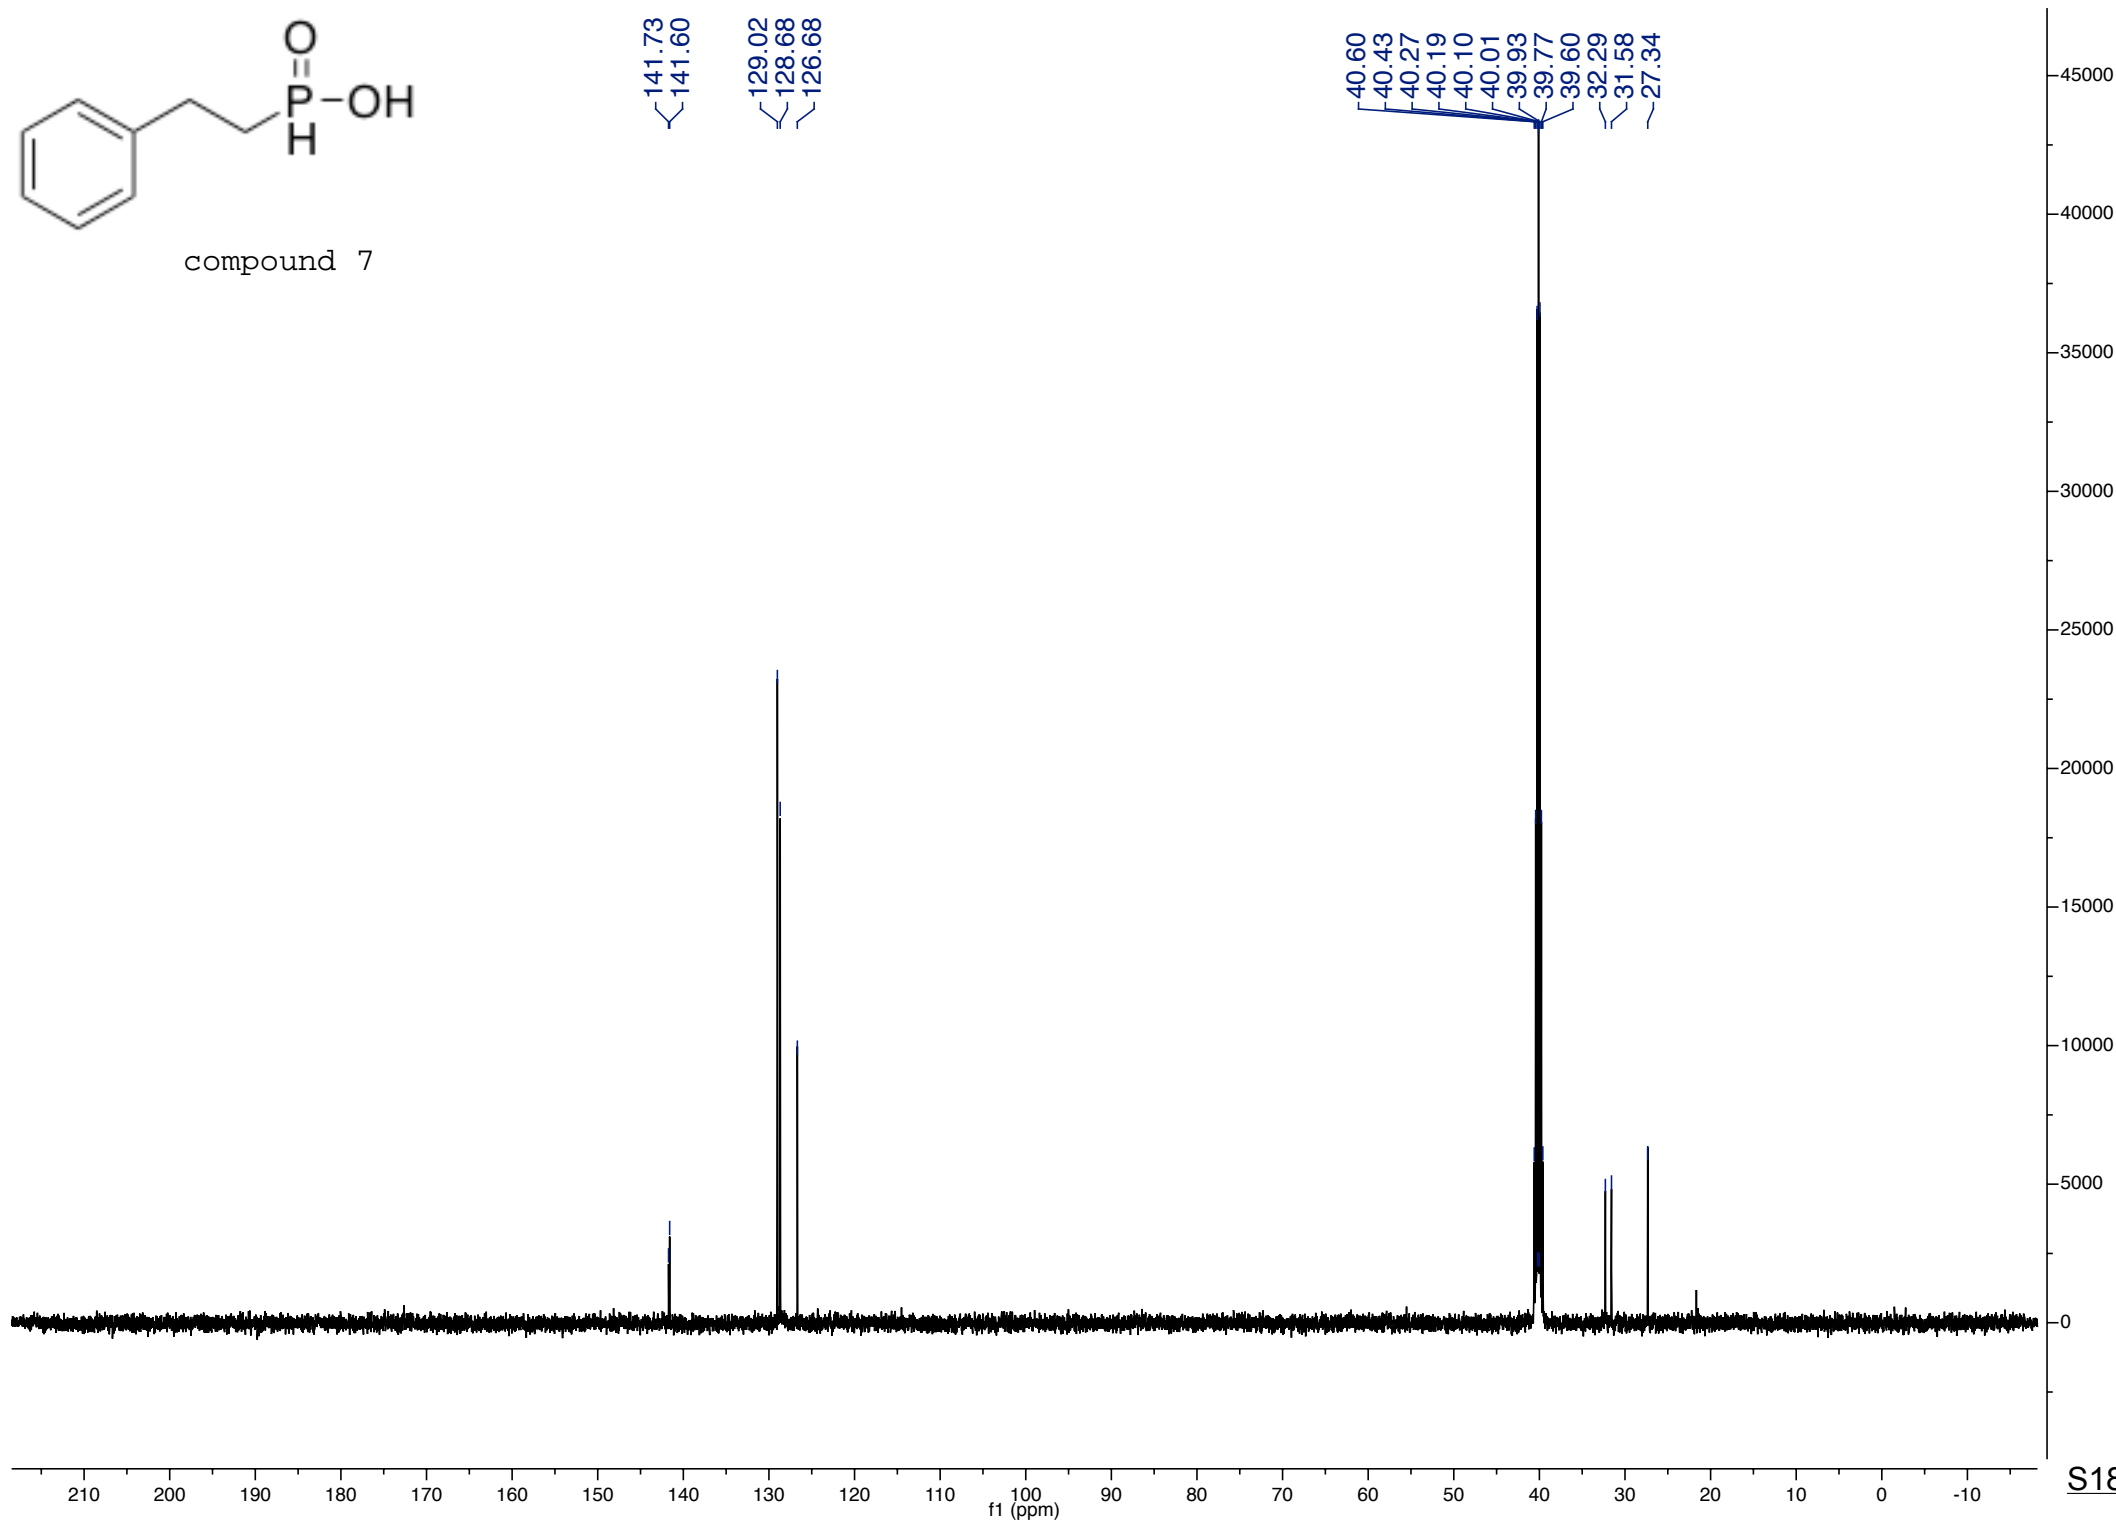



compound 7

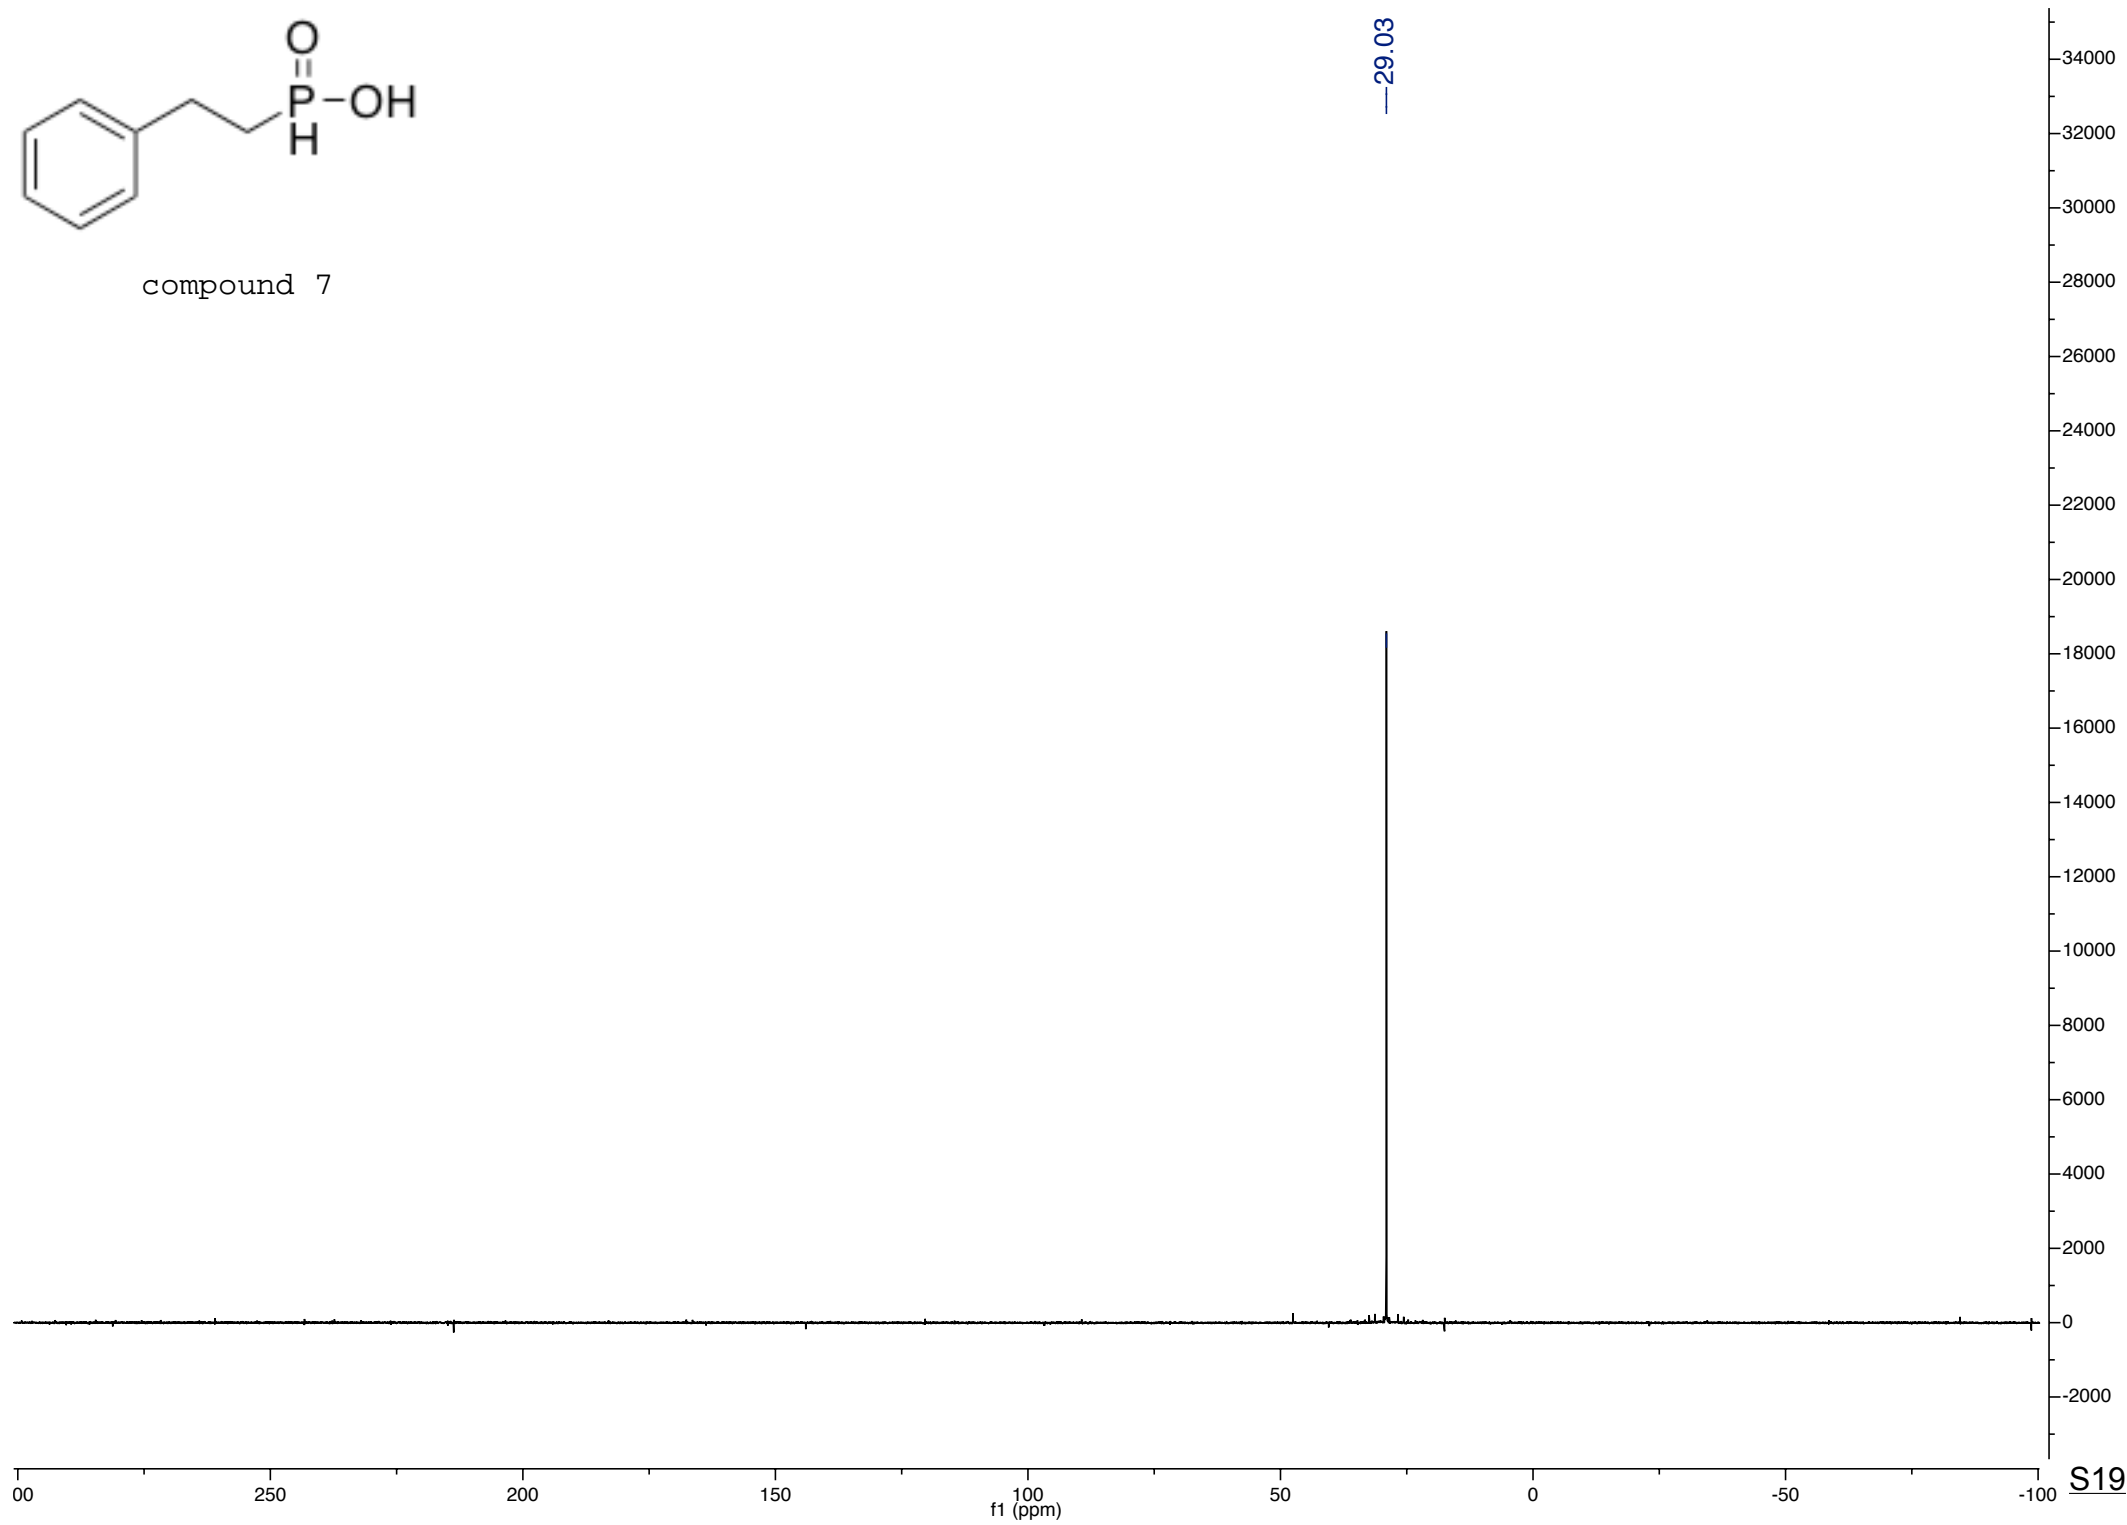

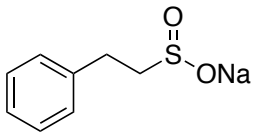

compound 9

7.267  
7.263  
7.255  
7.251  
7.243  
7.238  
7.234  
7.221  
7.165  
7.161  
7.156  
7.151  
7.147  
7.142  
7.134

4.909

3.317  
3.313  
3.310  
3.307  
3.303  
2.910  
2.893  
2.889  
2.876  
2.540  
2.531  
2.528  
2.523  
2.519  
2.517  
2.507

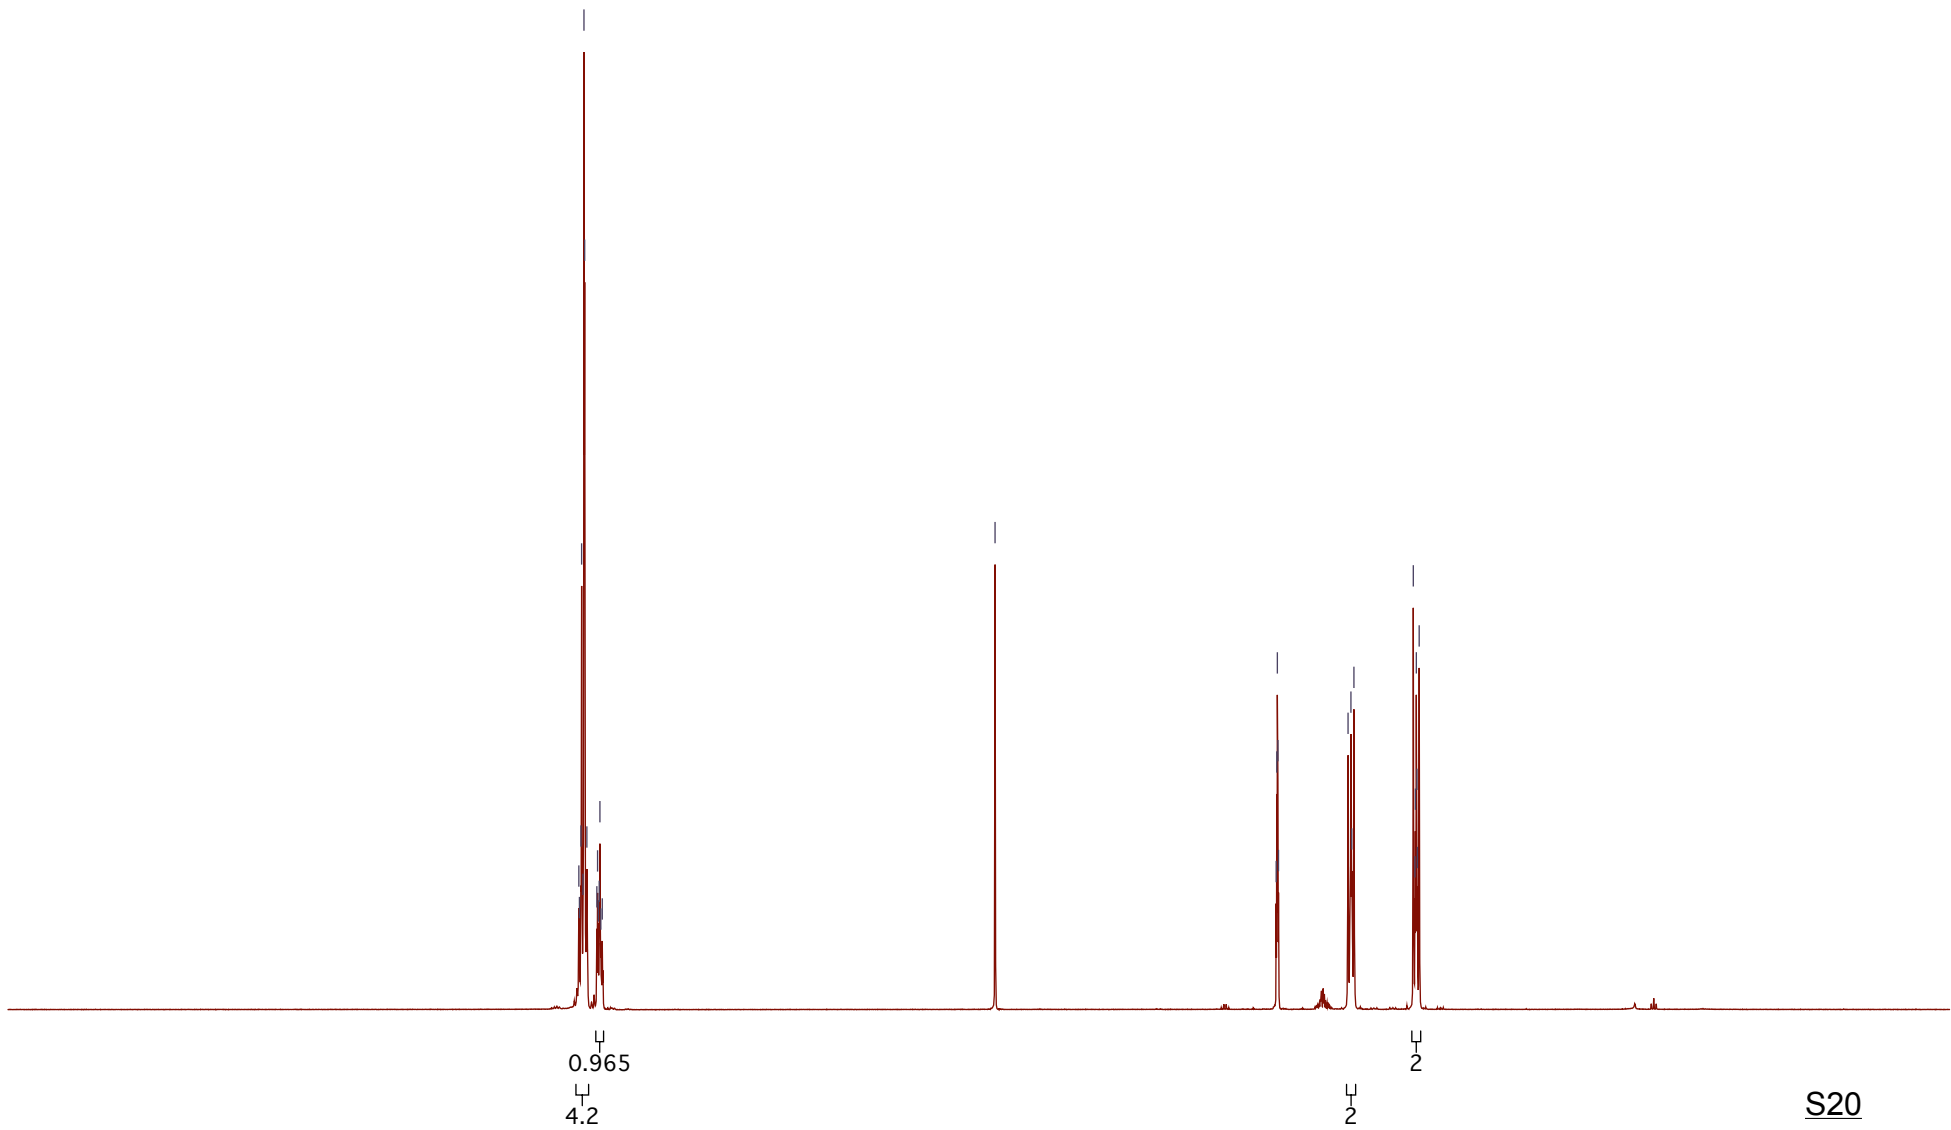

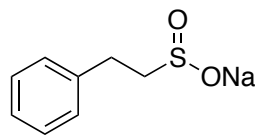

compound 9

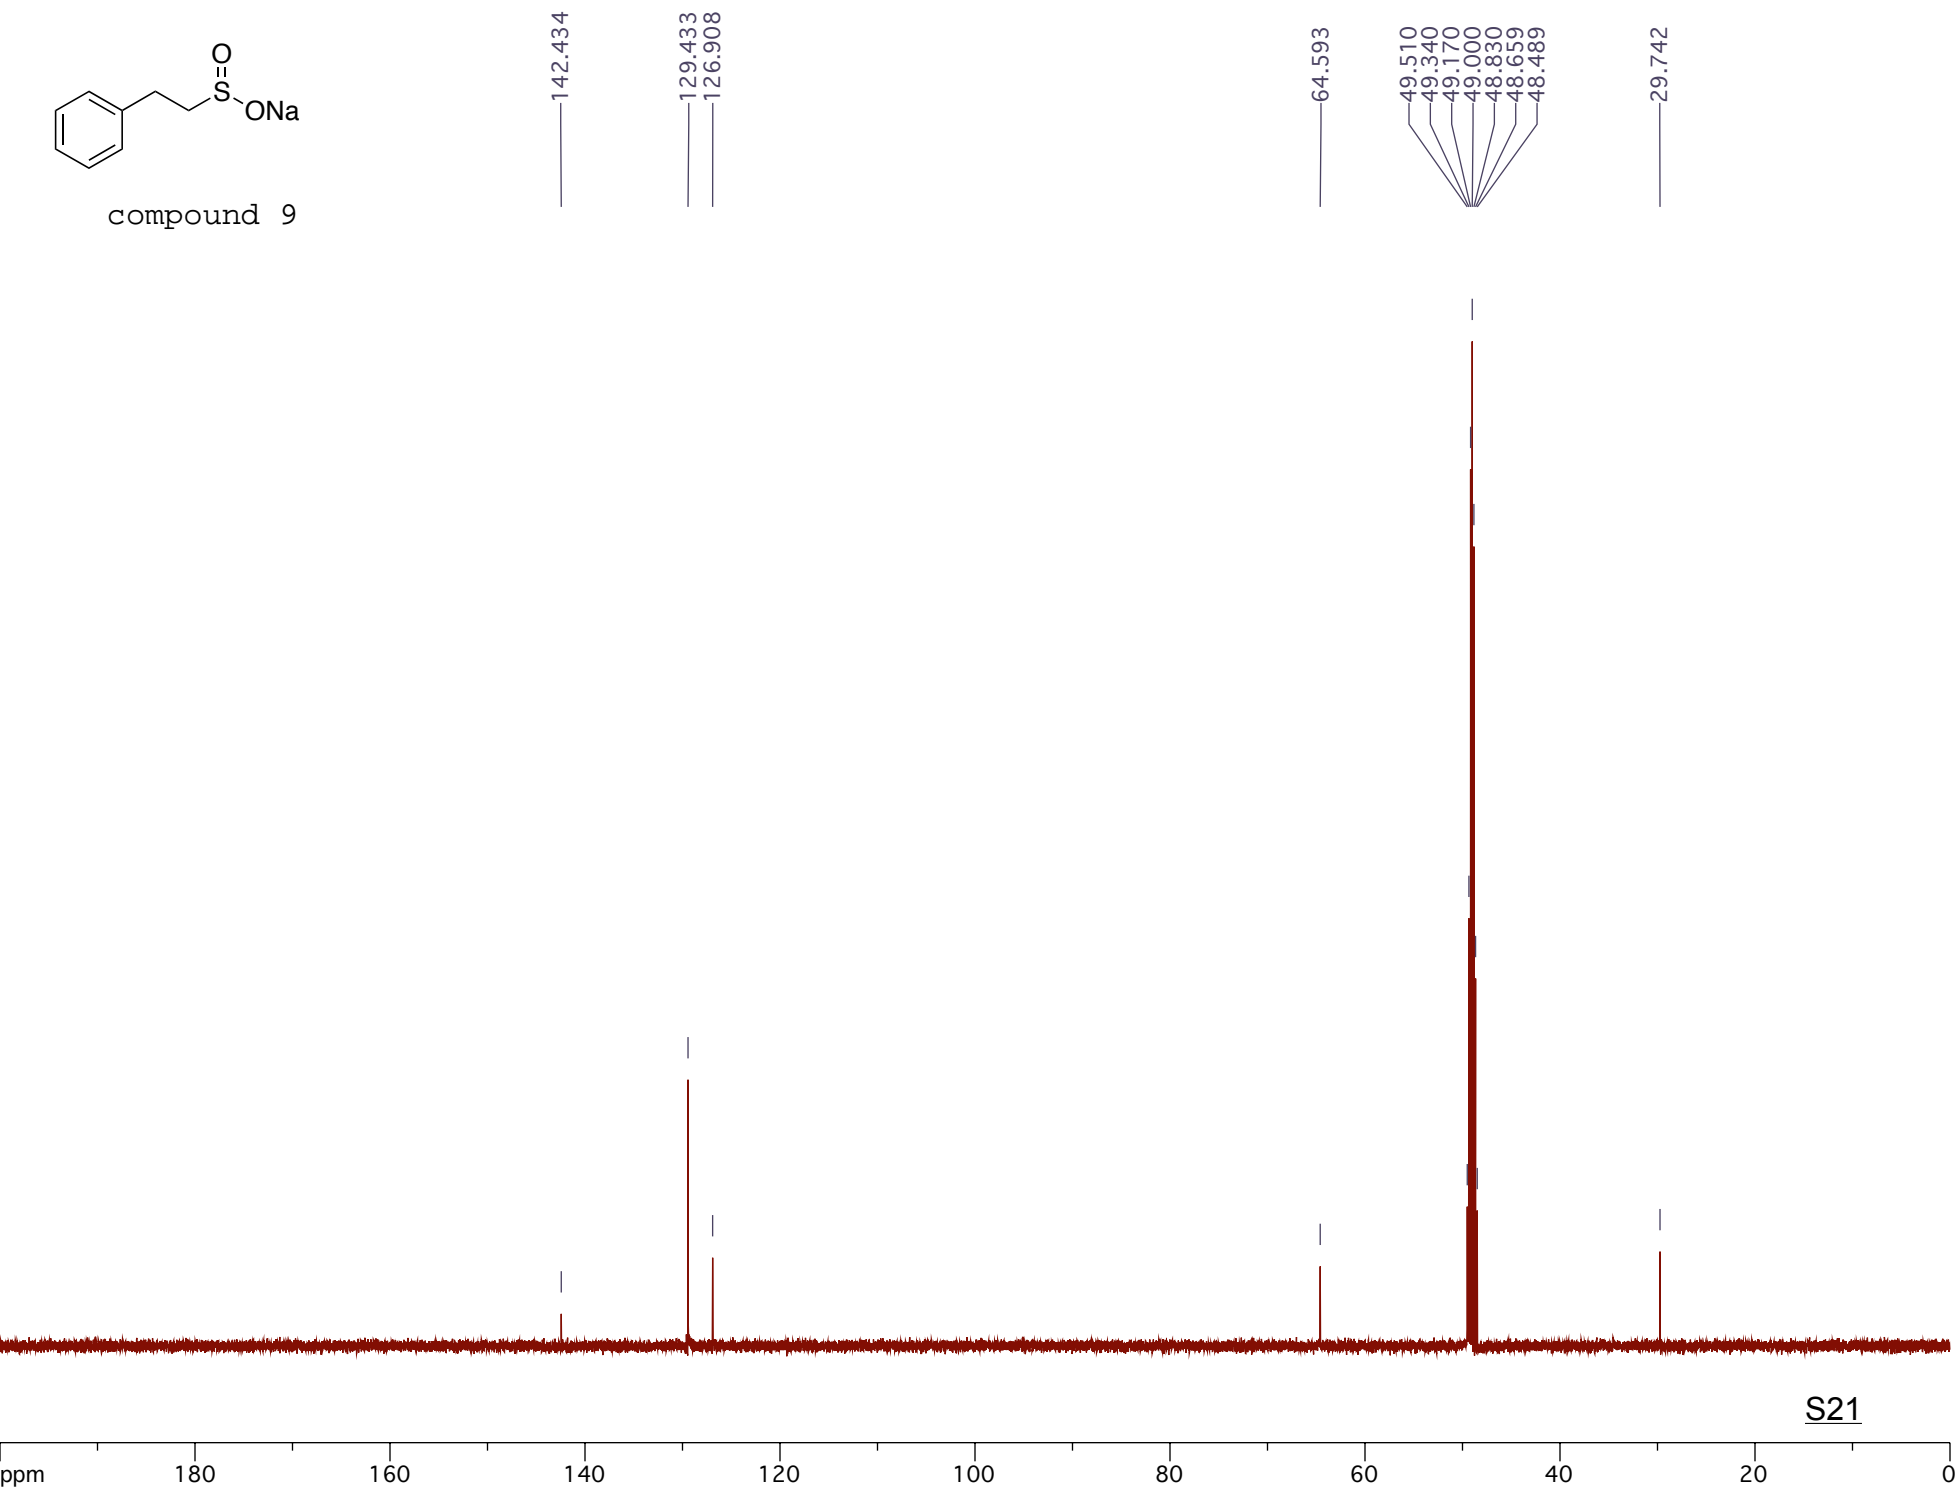

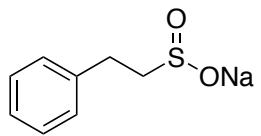

compound 9

DEPT-135

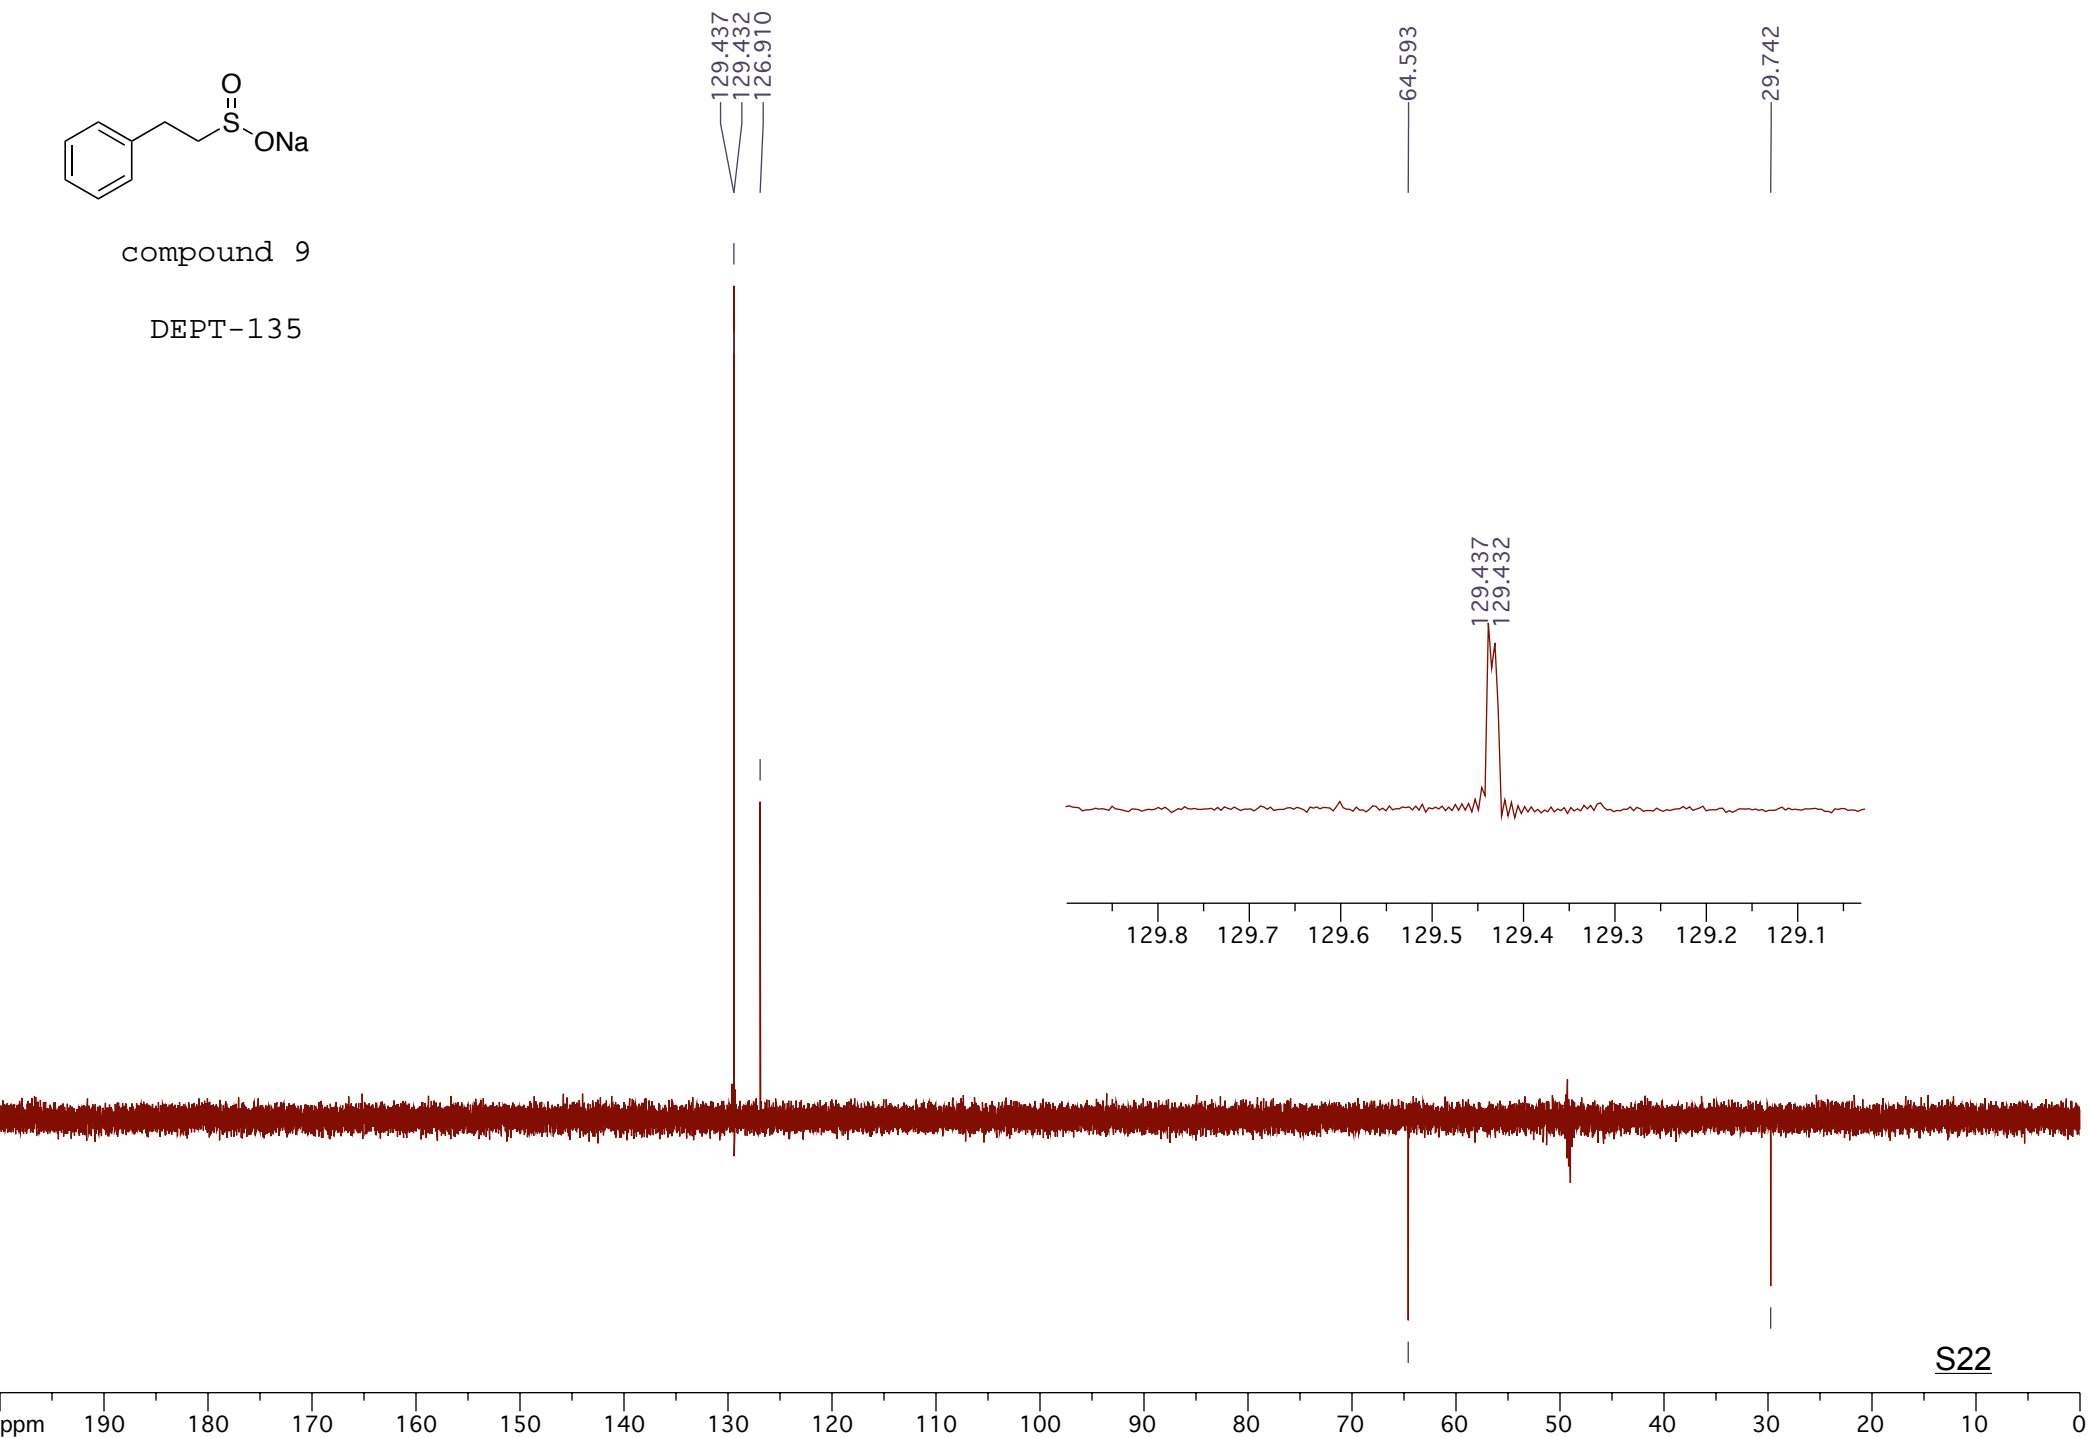

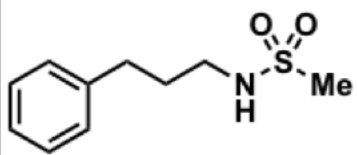

compound 11

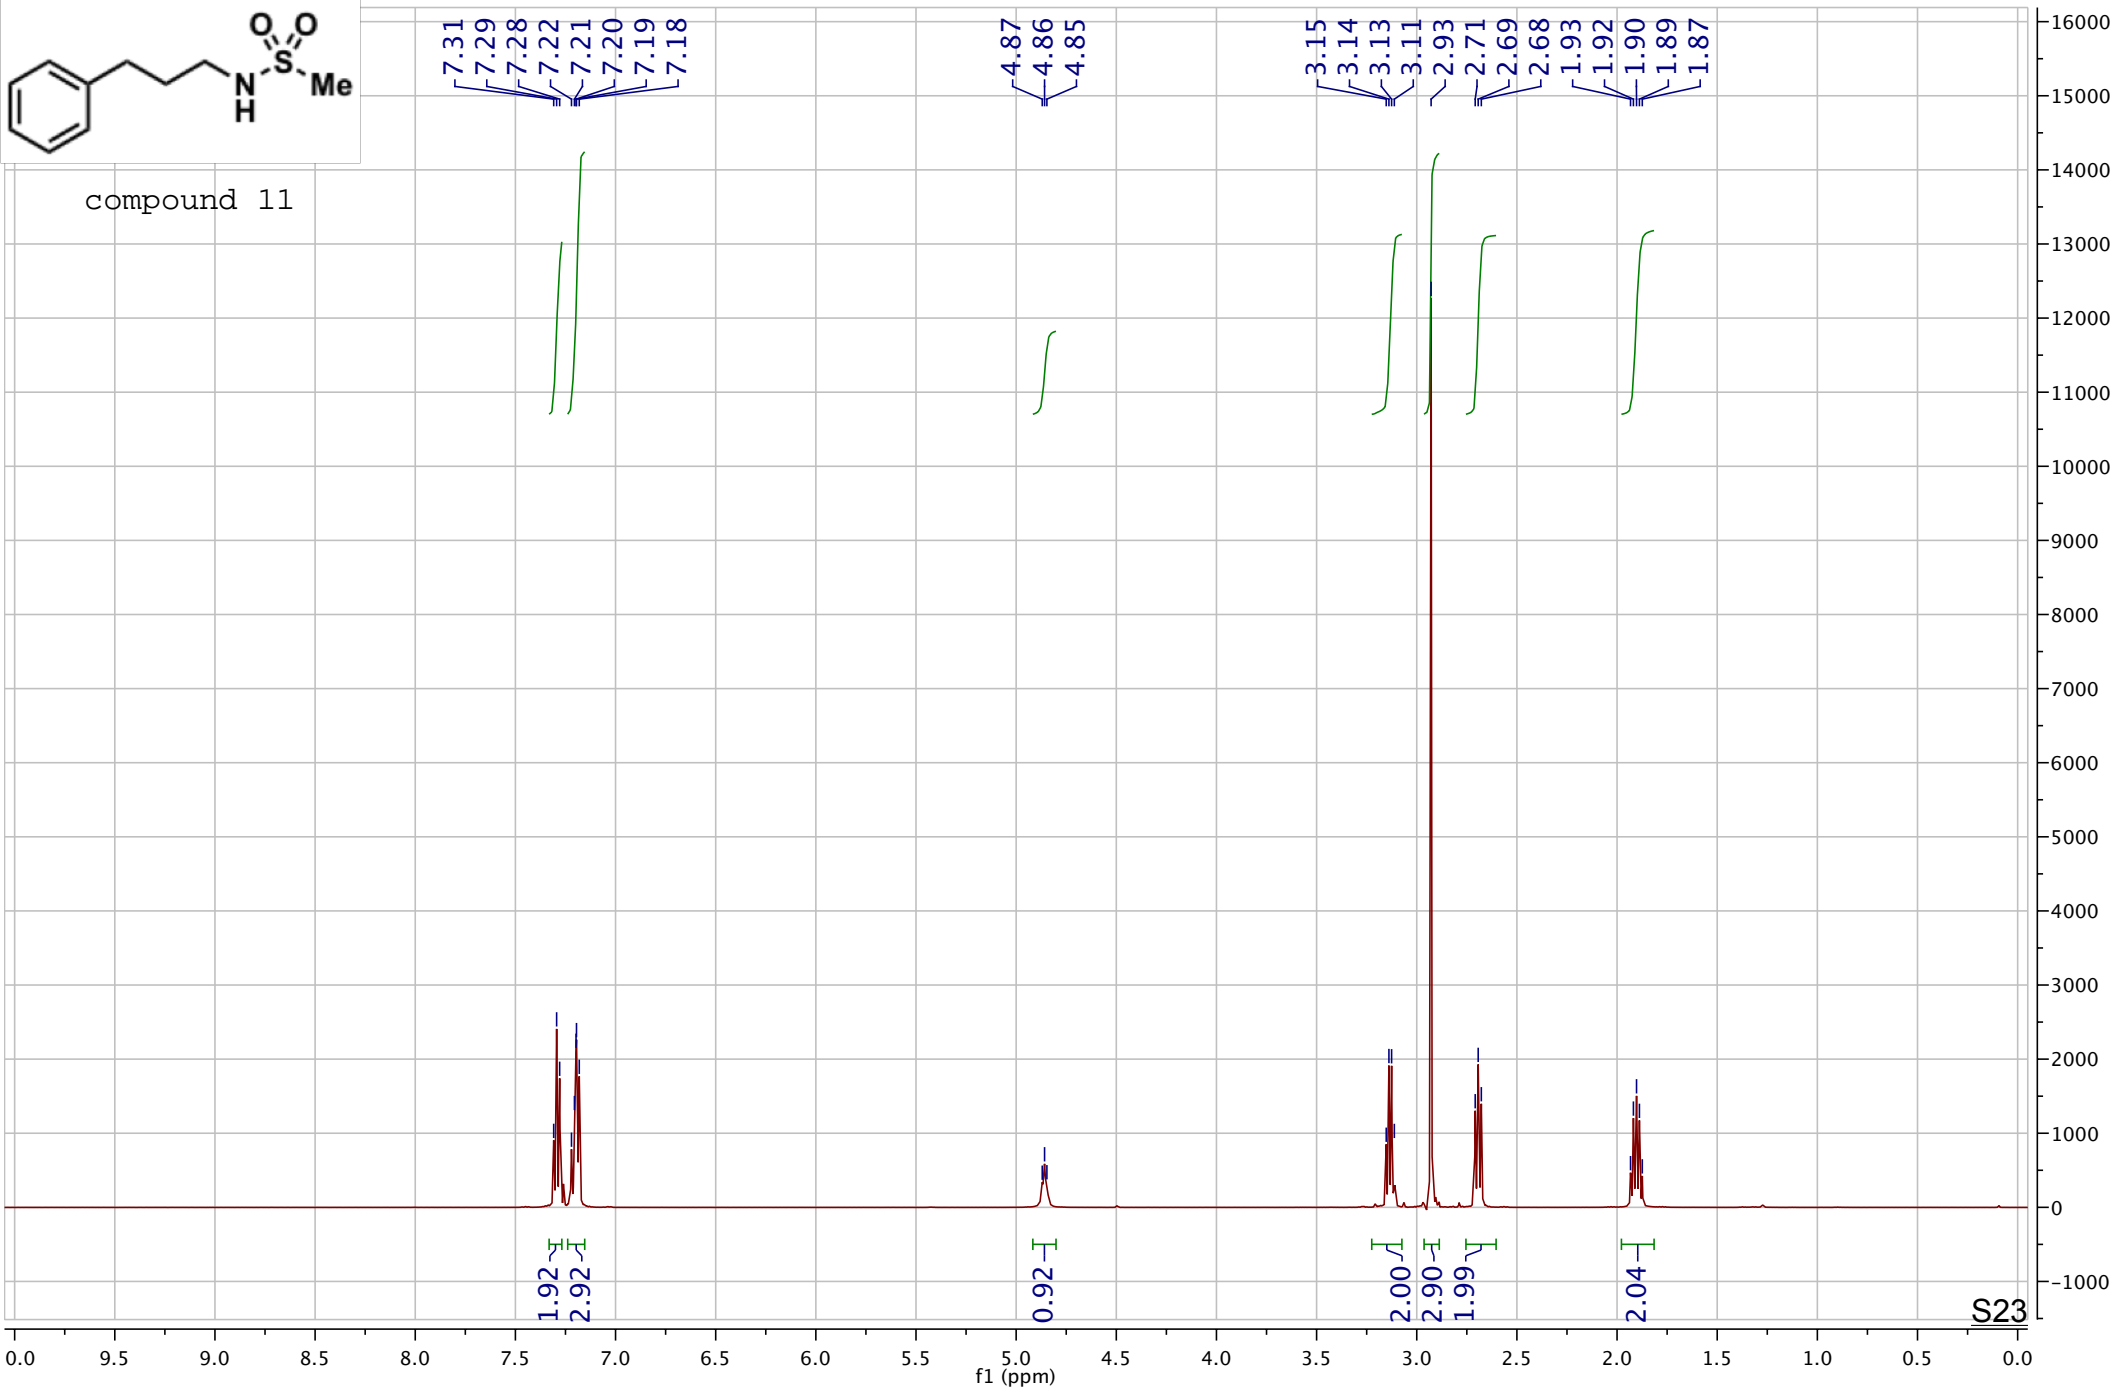

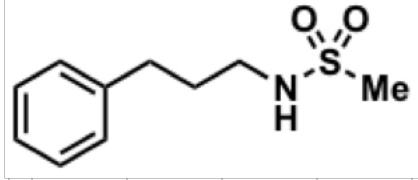

compound 11

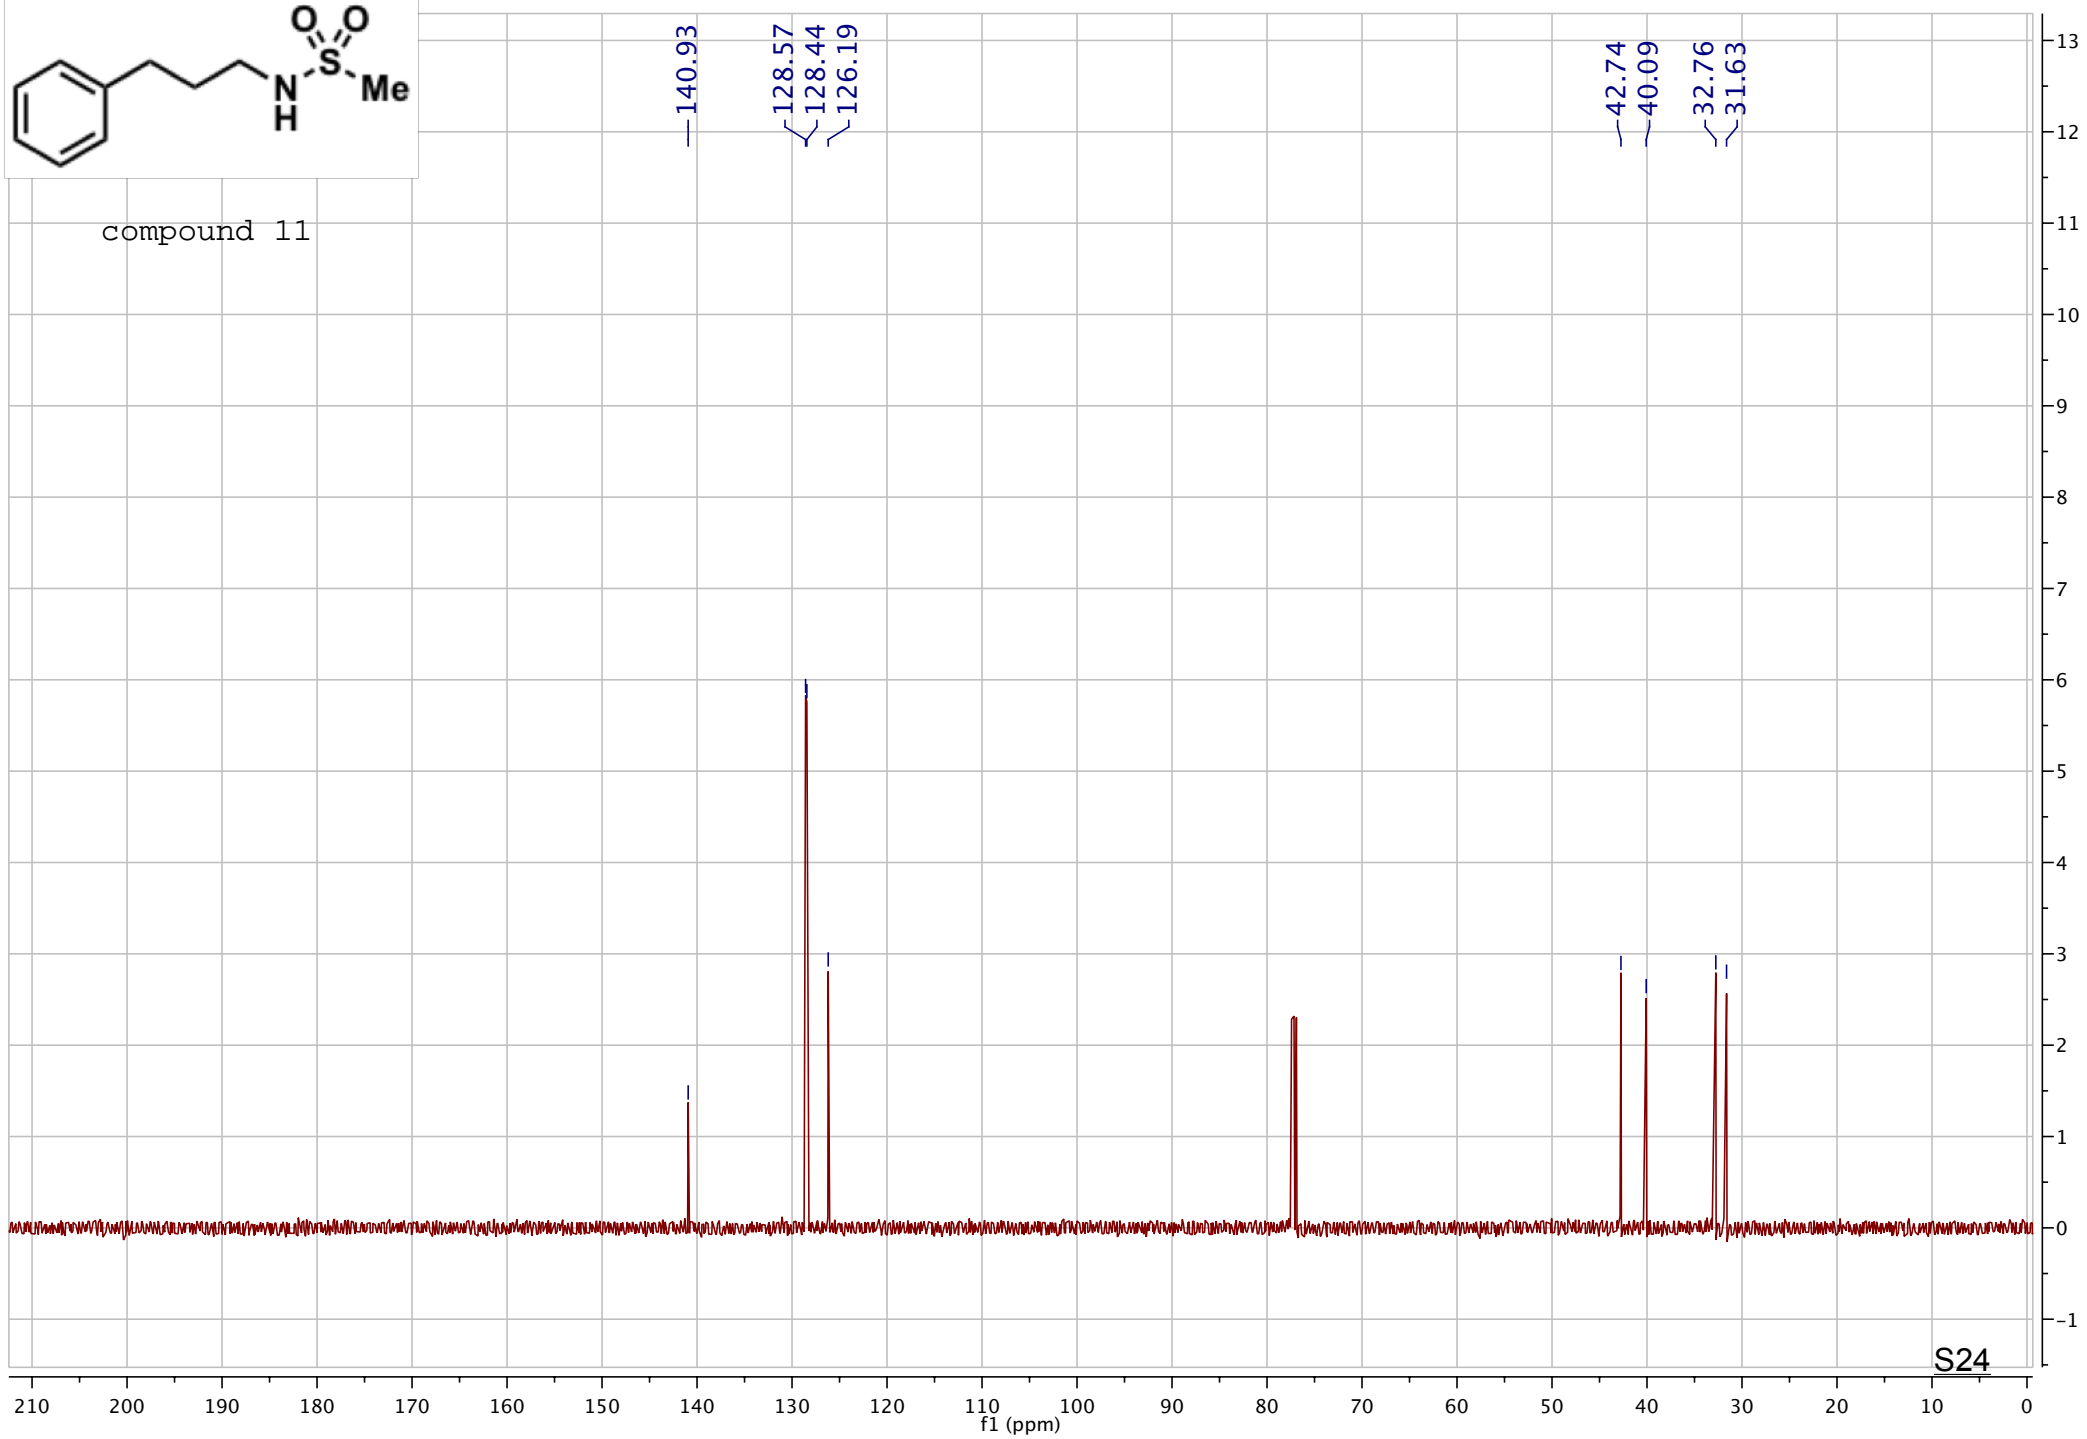



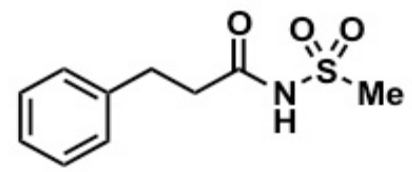

compound 12

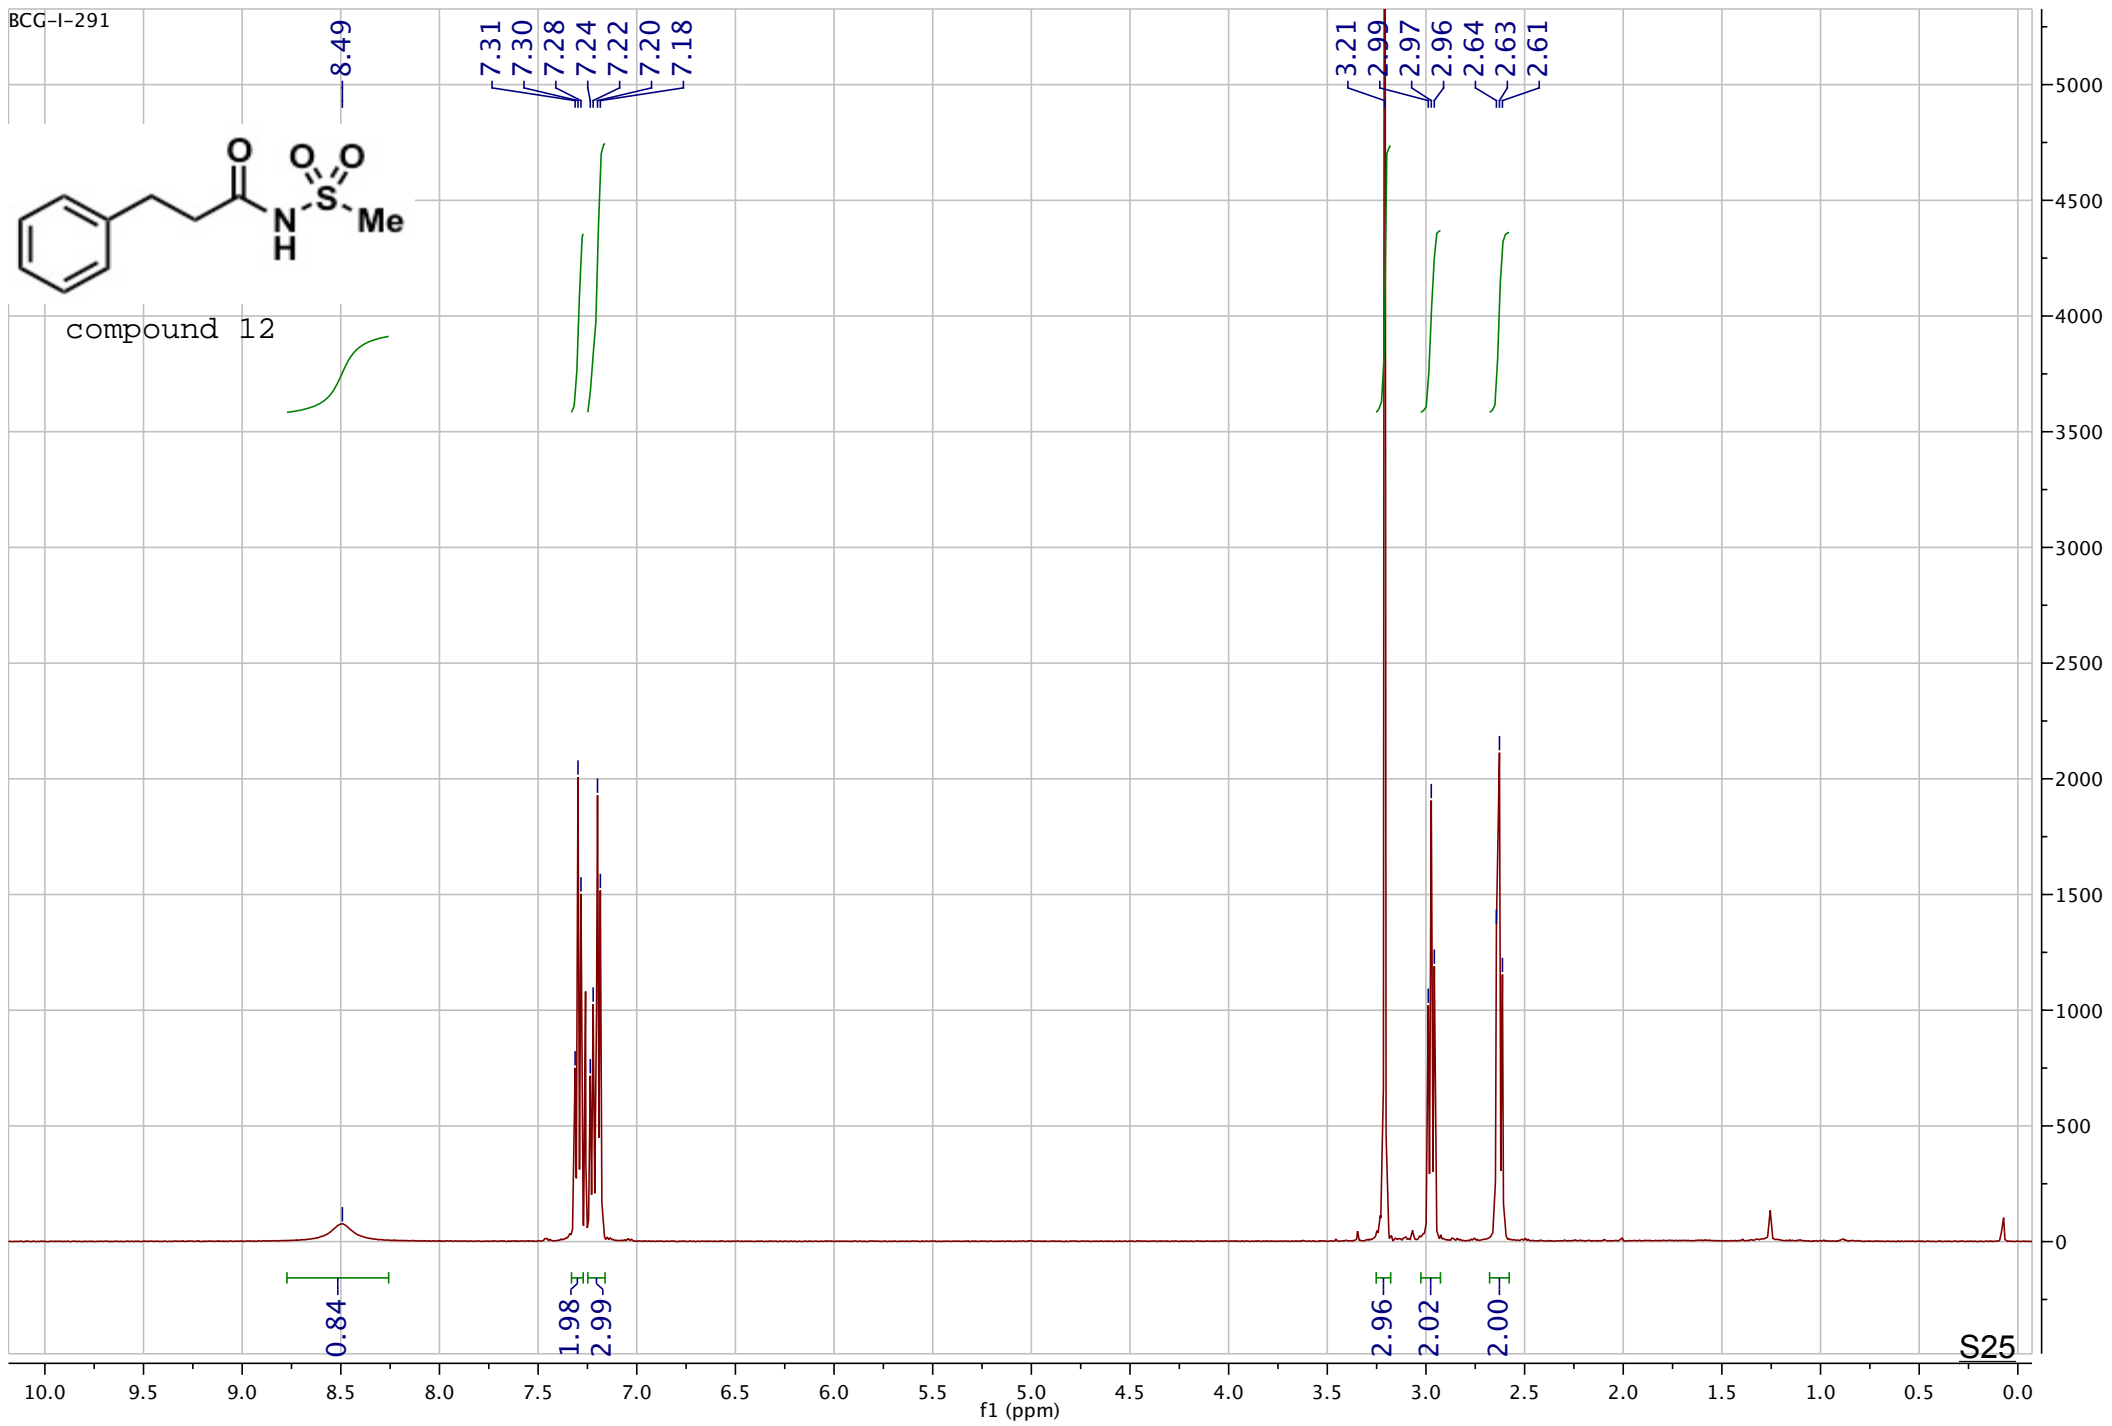

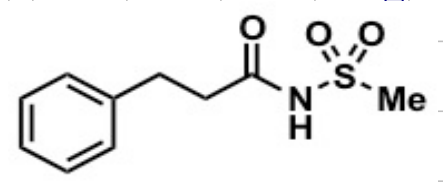

compound 12

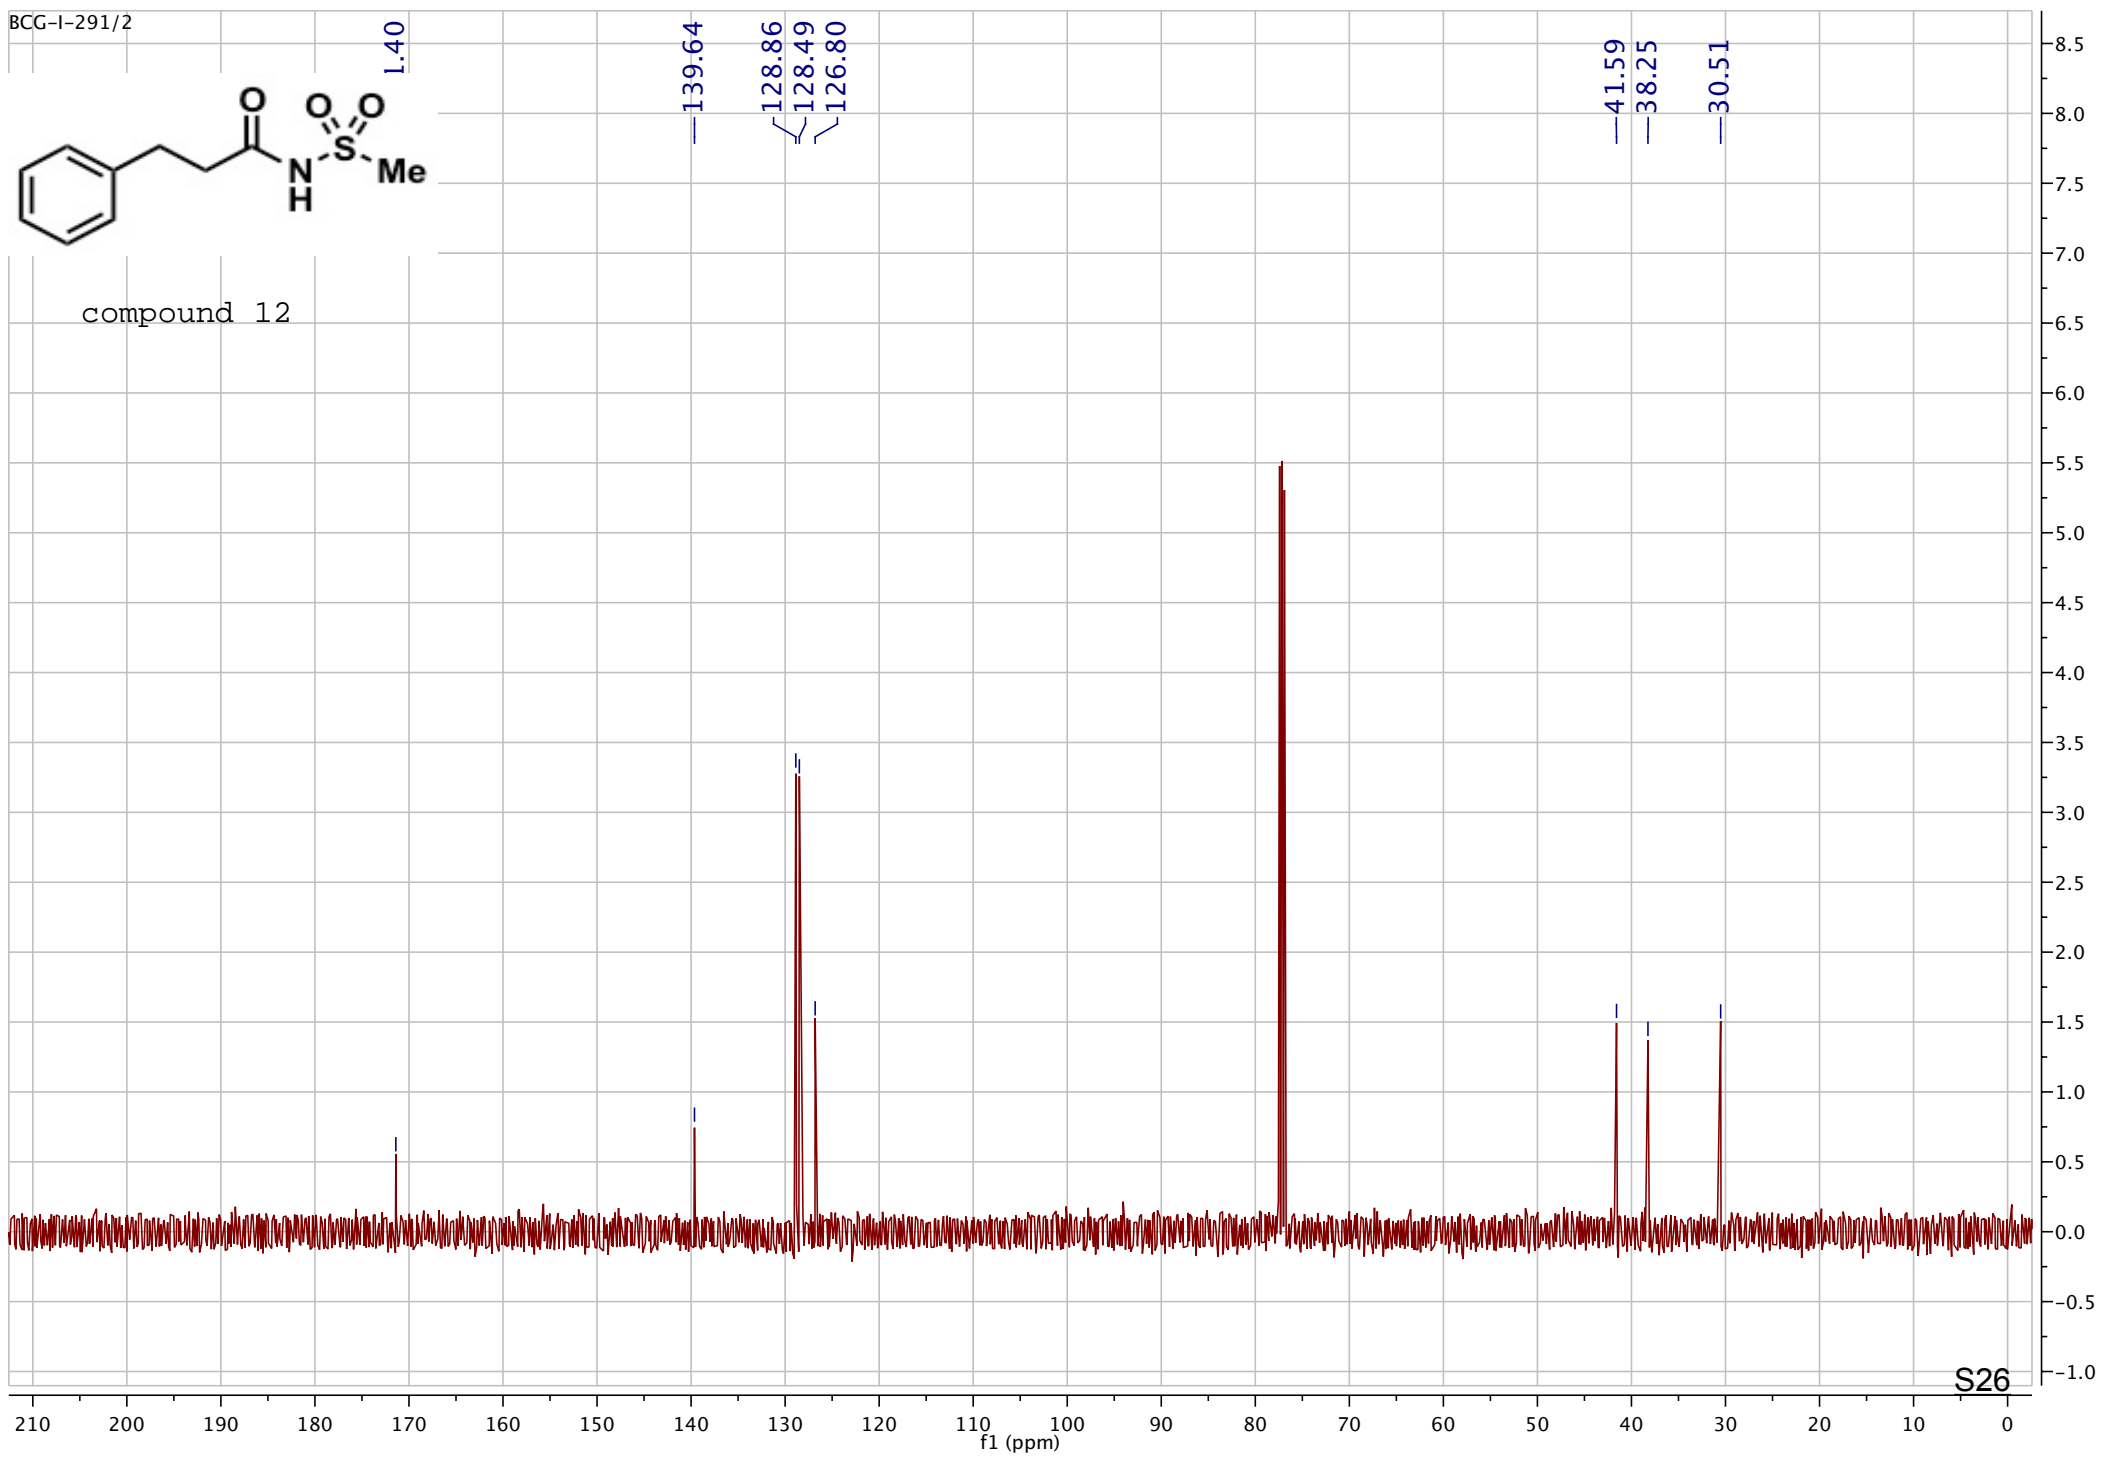

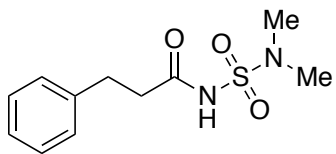

compound 13

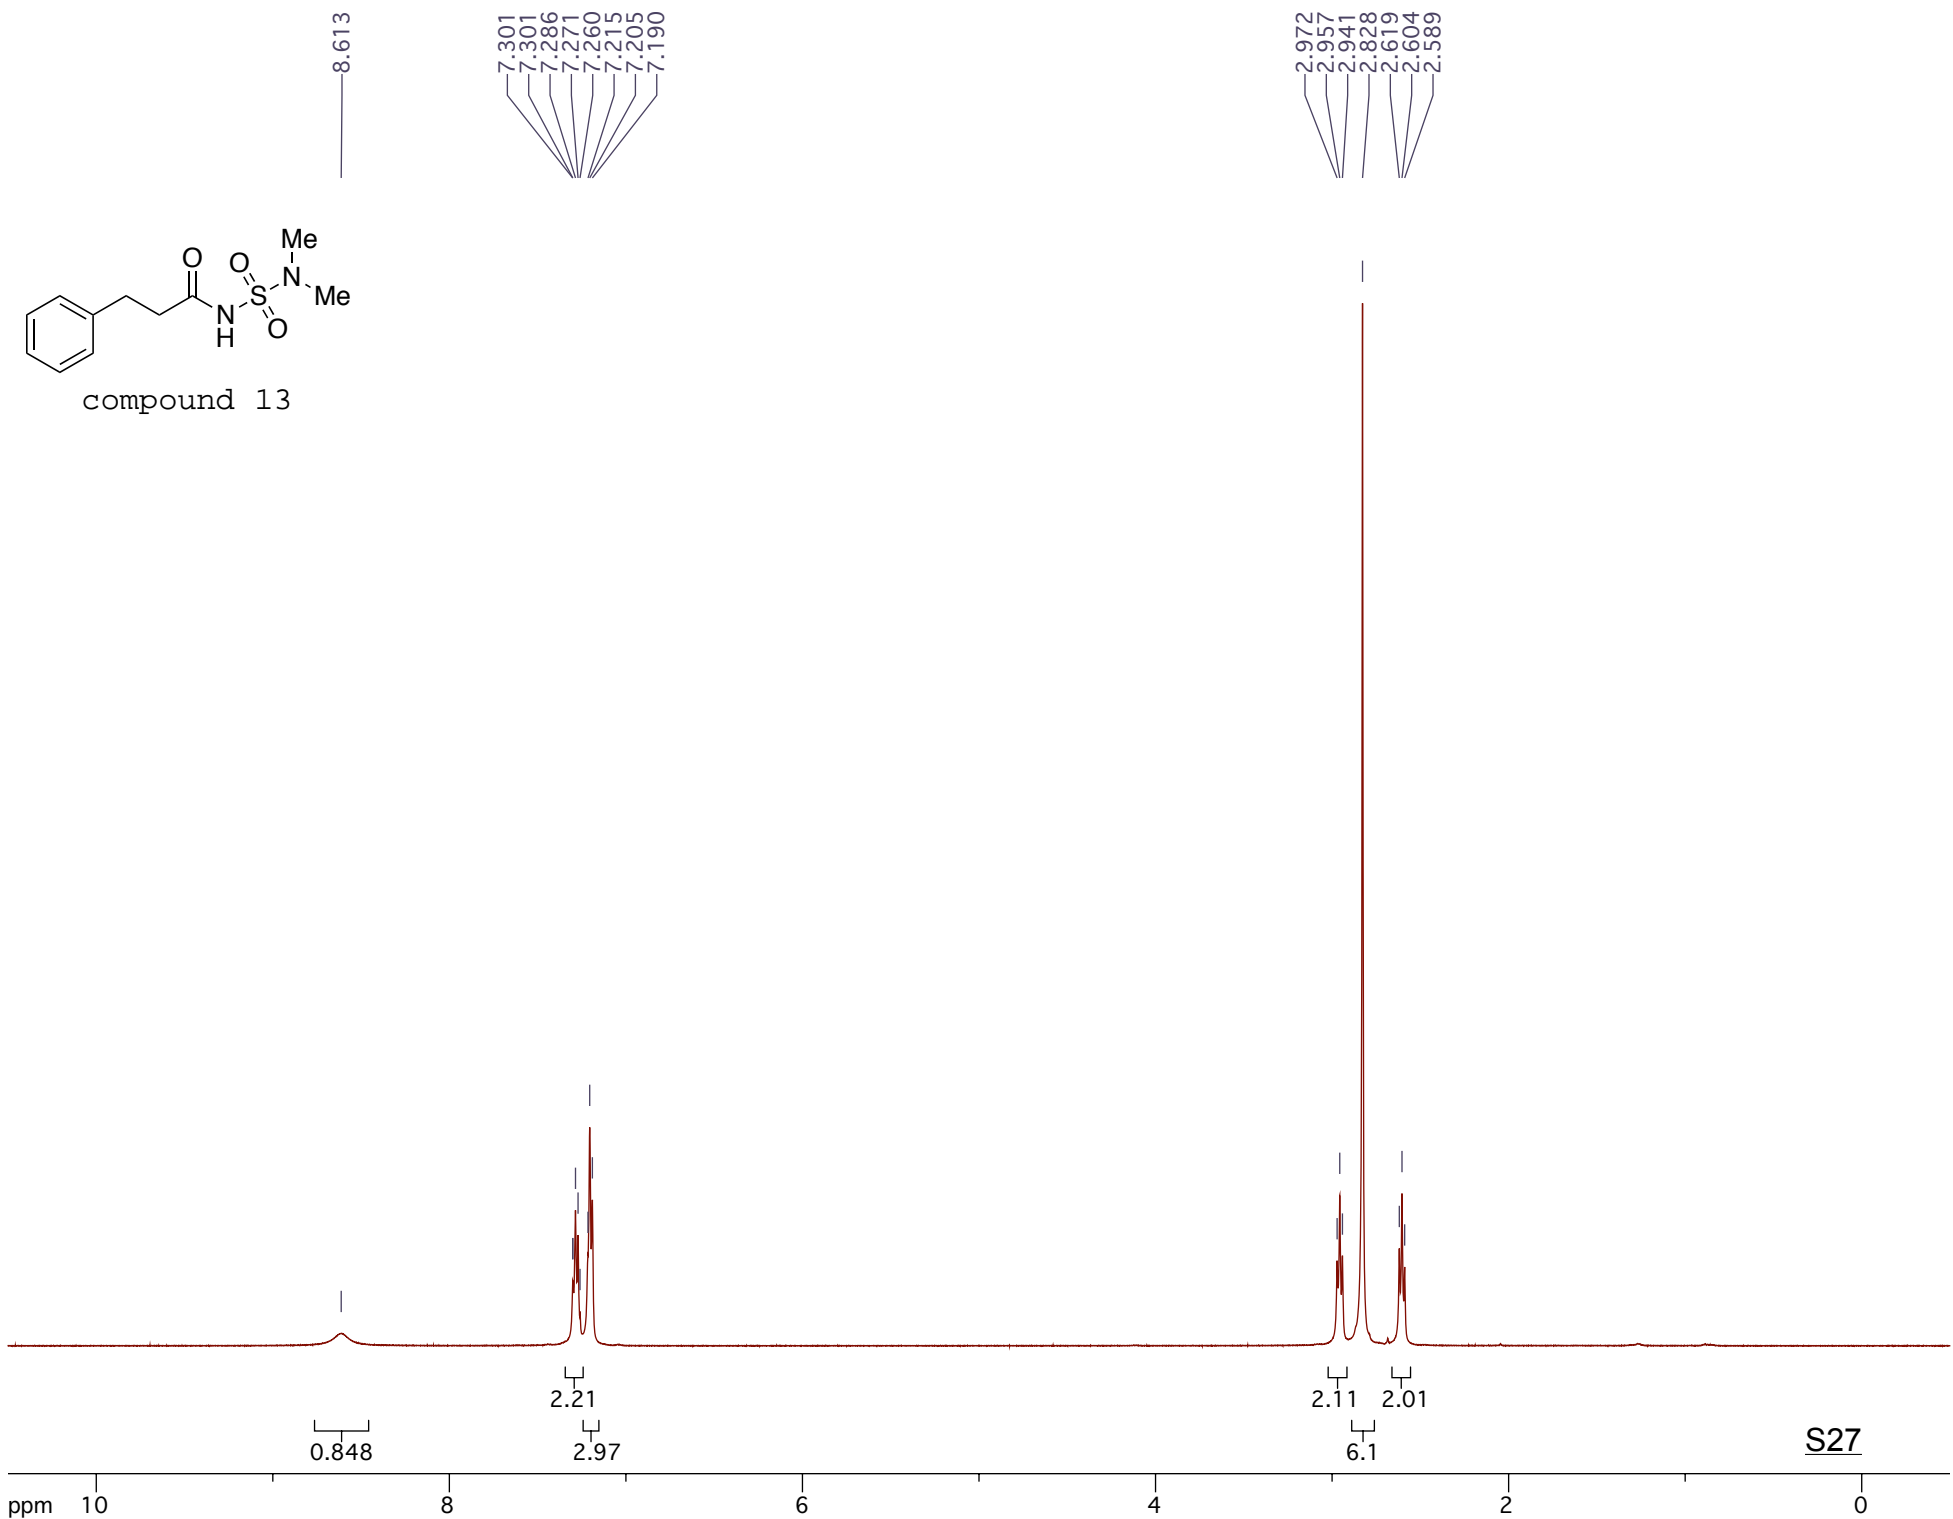

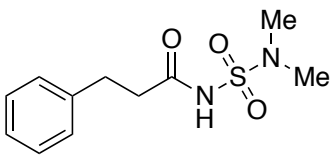

compound 13

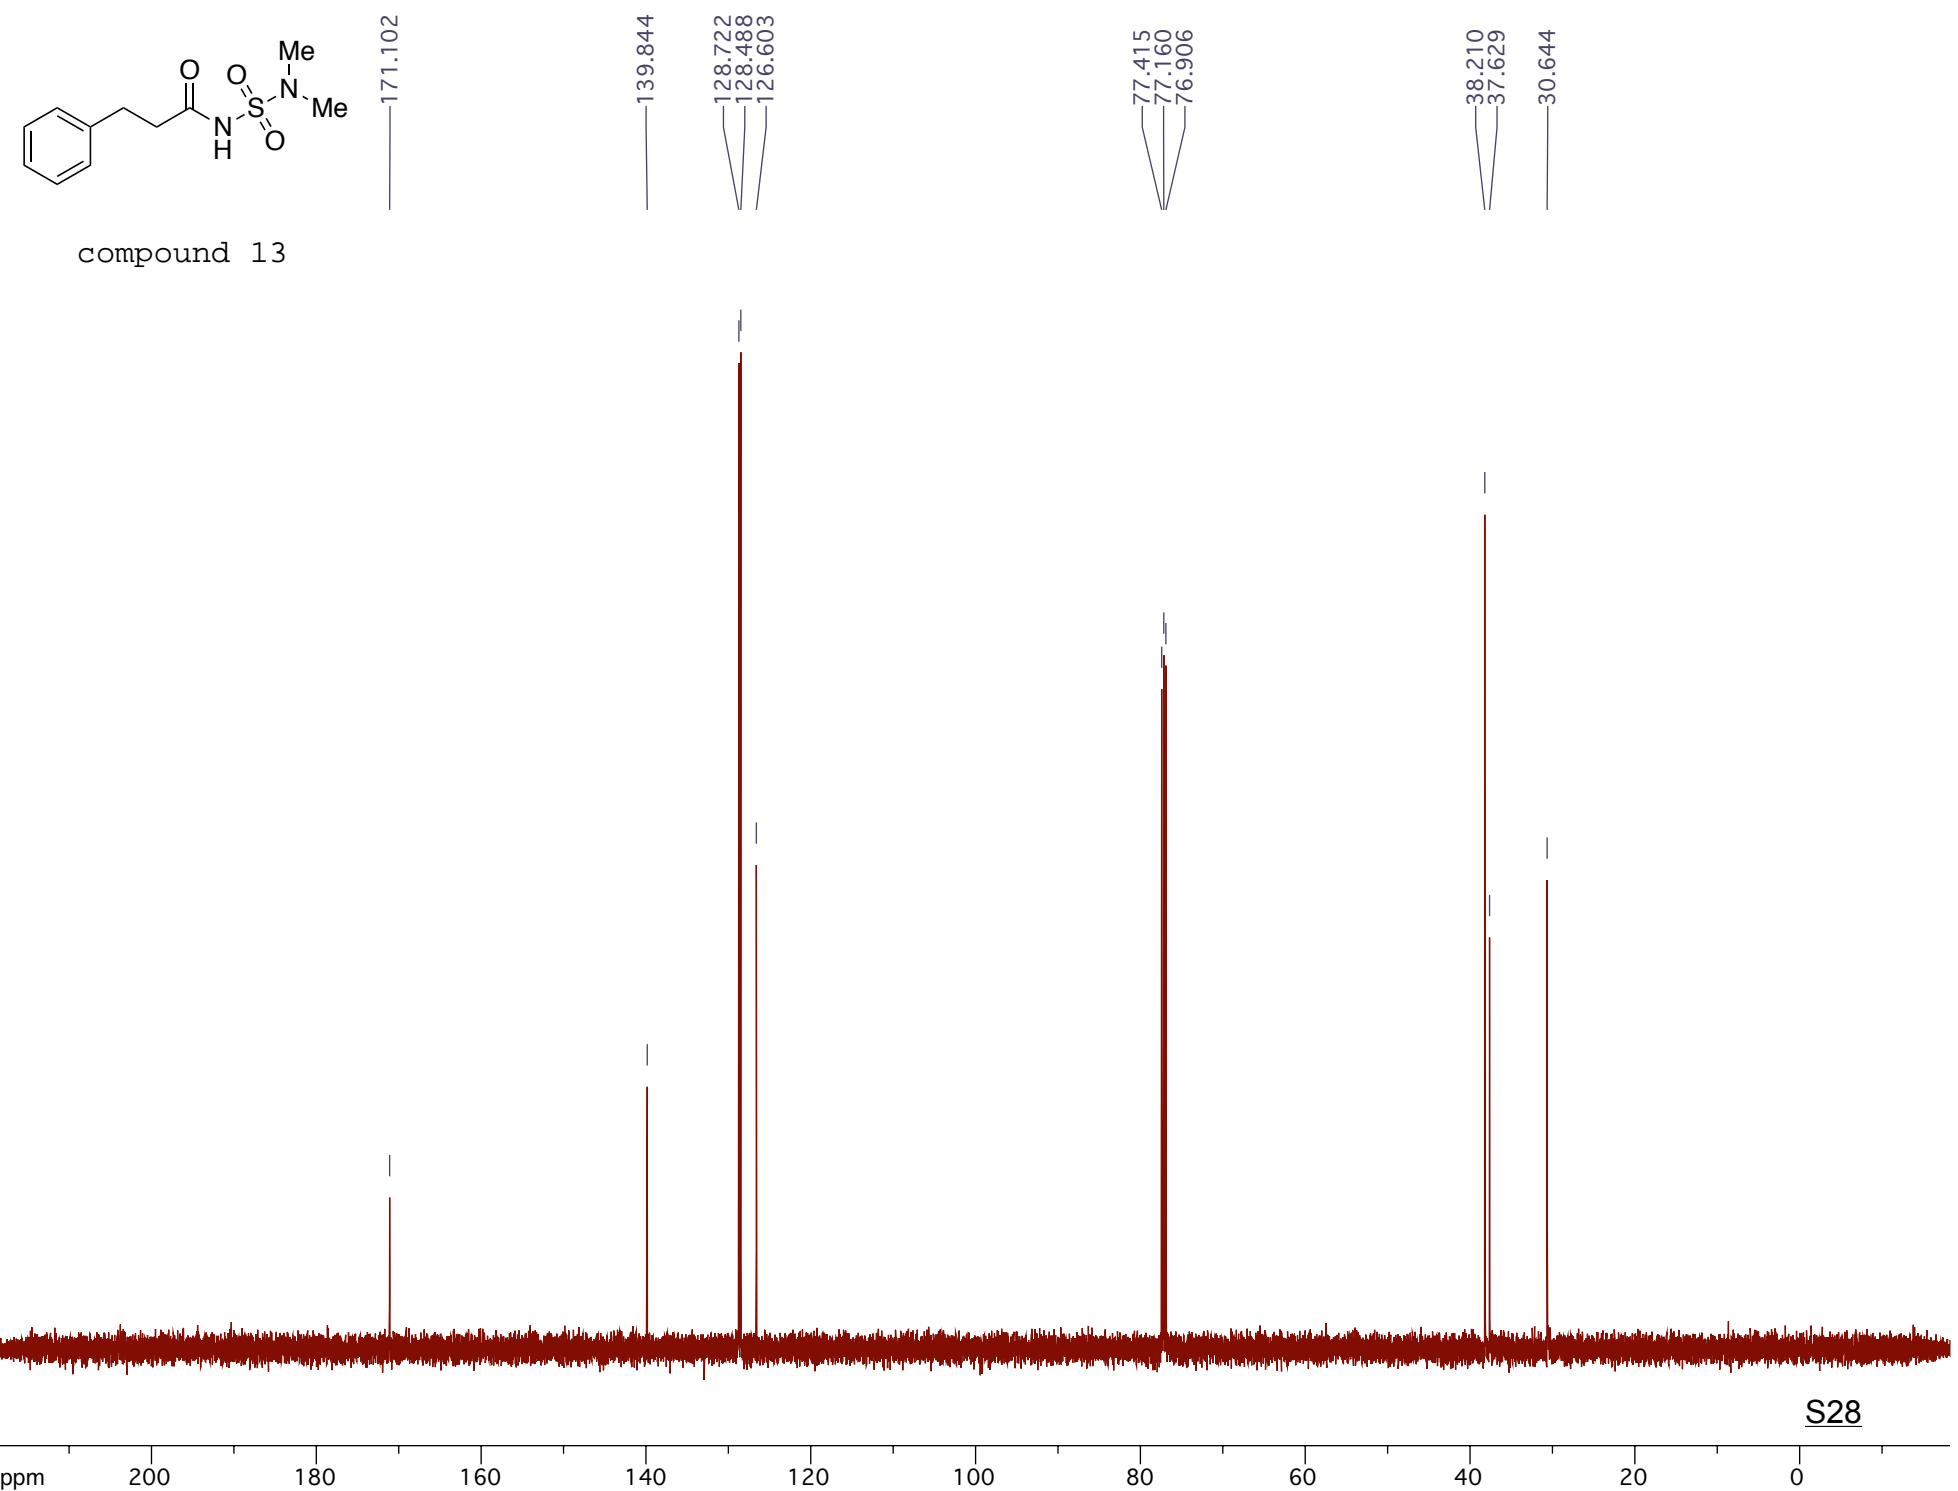

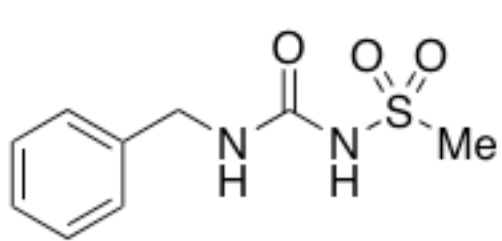

compound 14

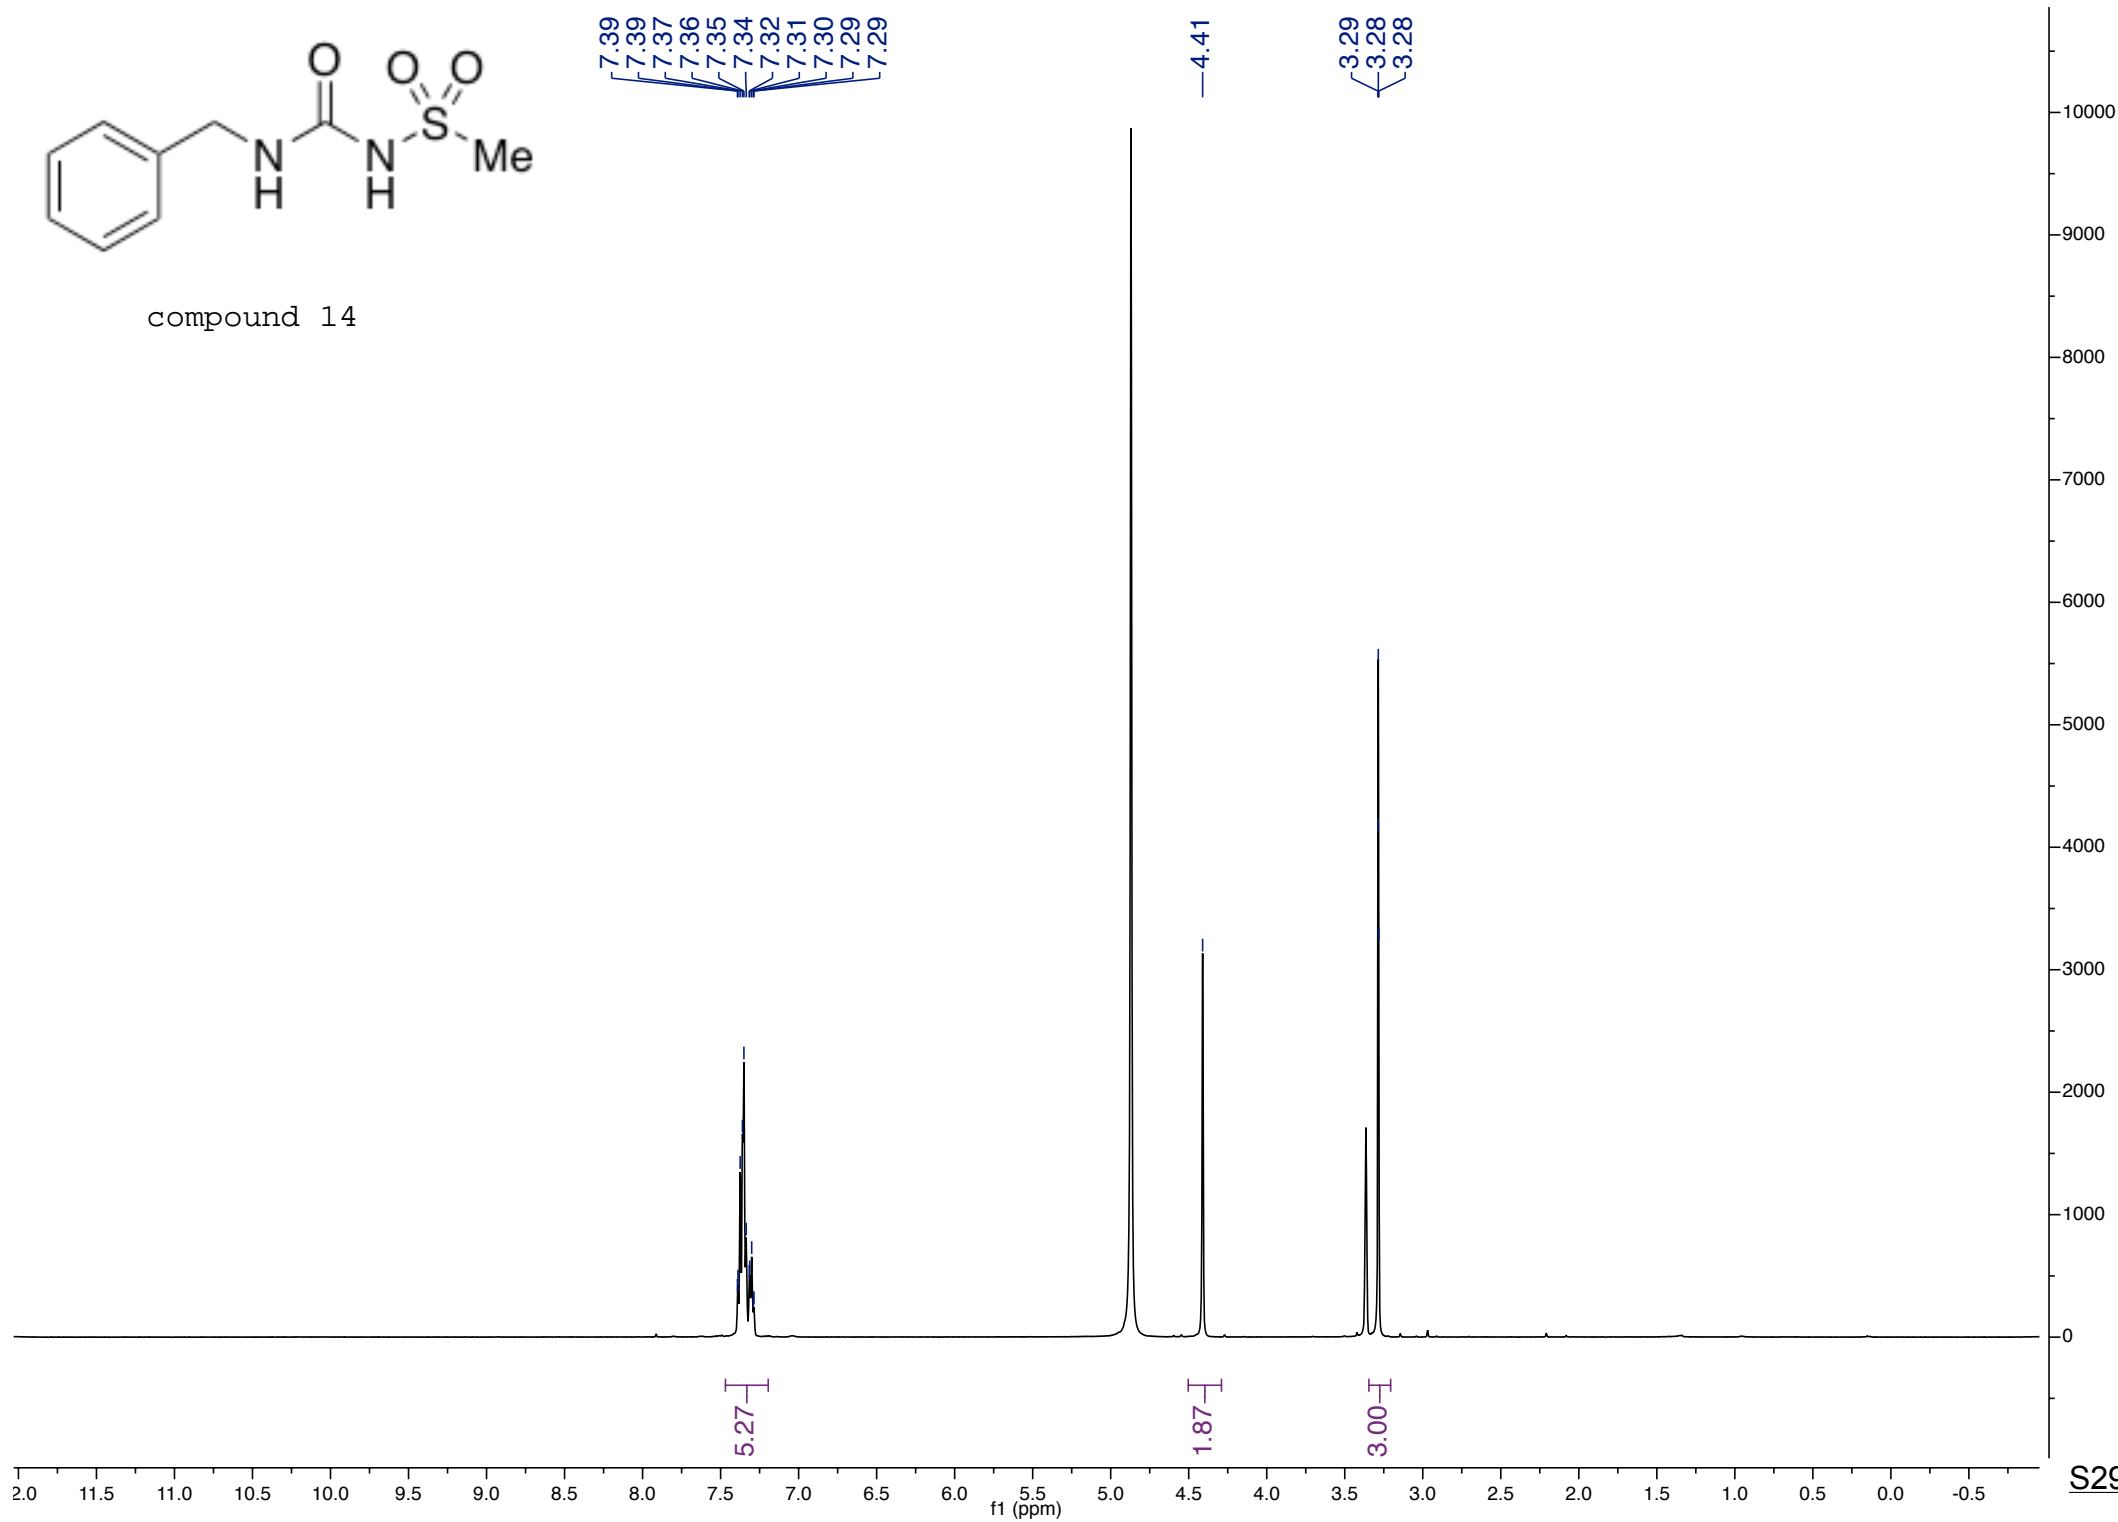

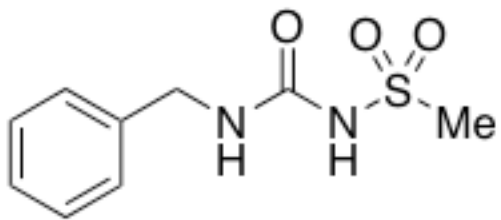

compound 14

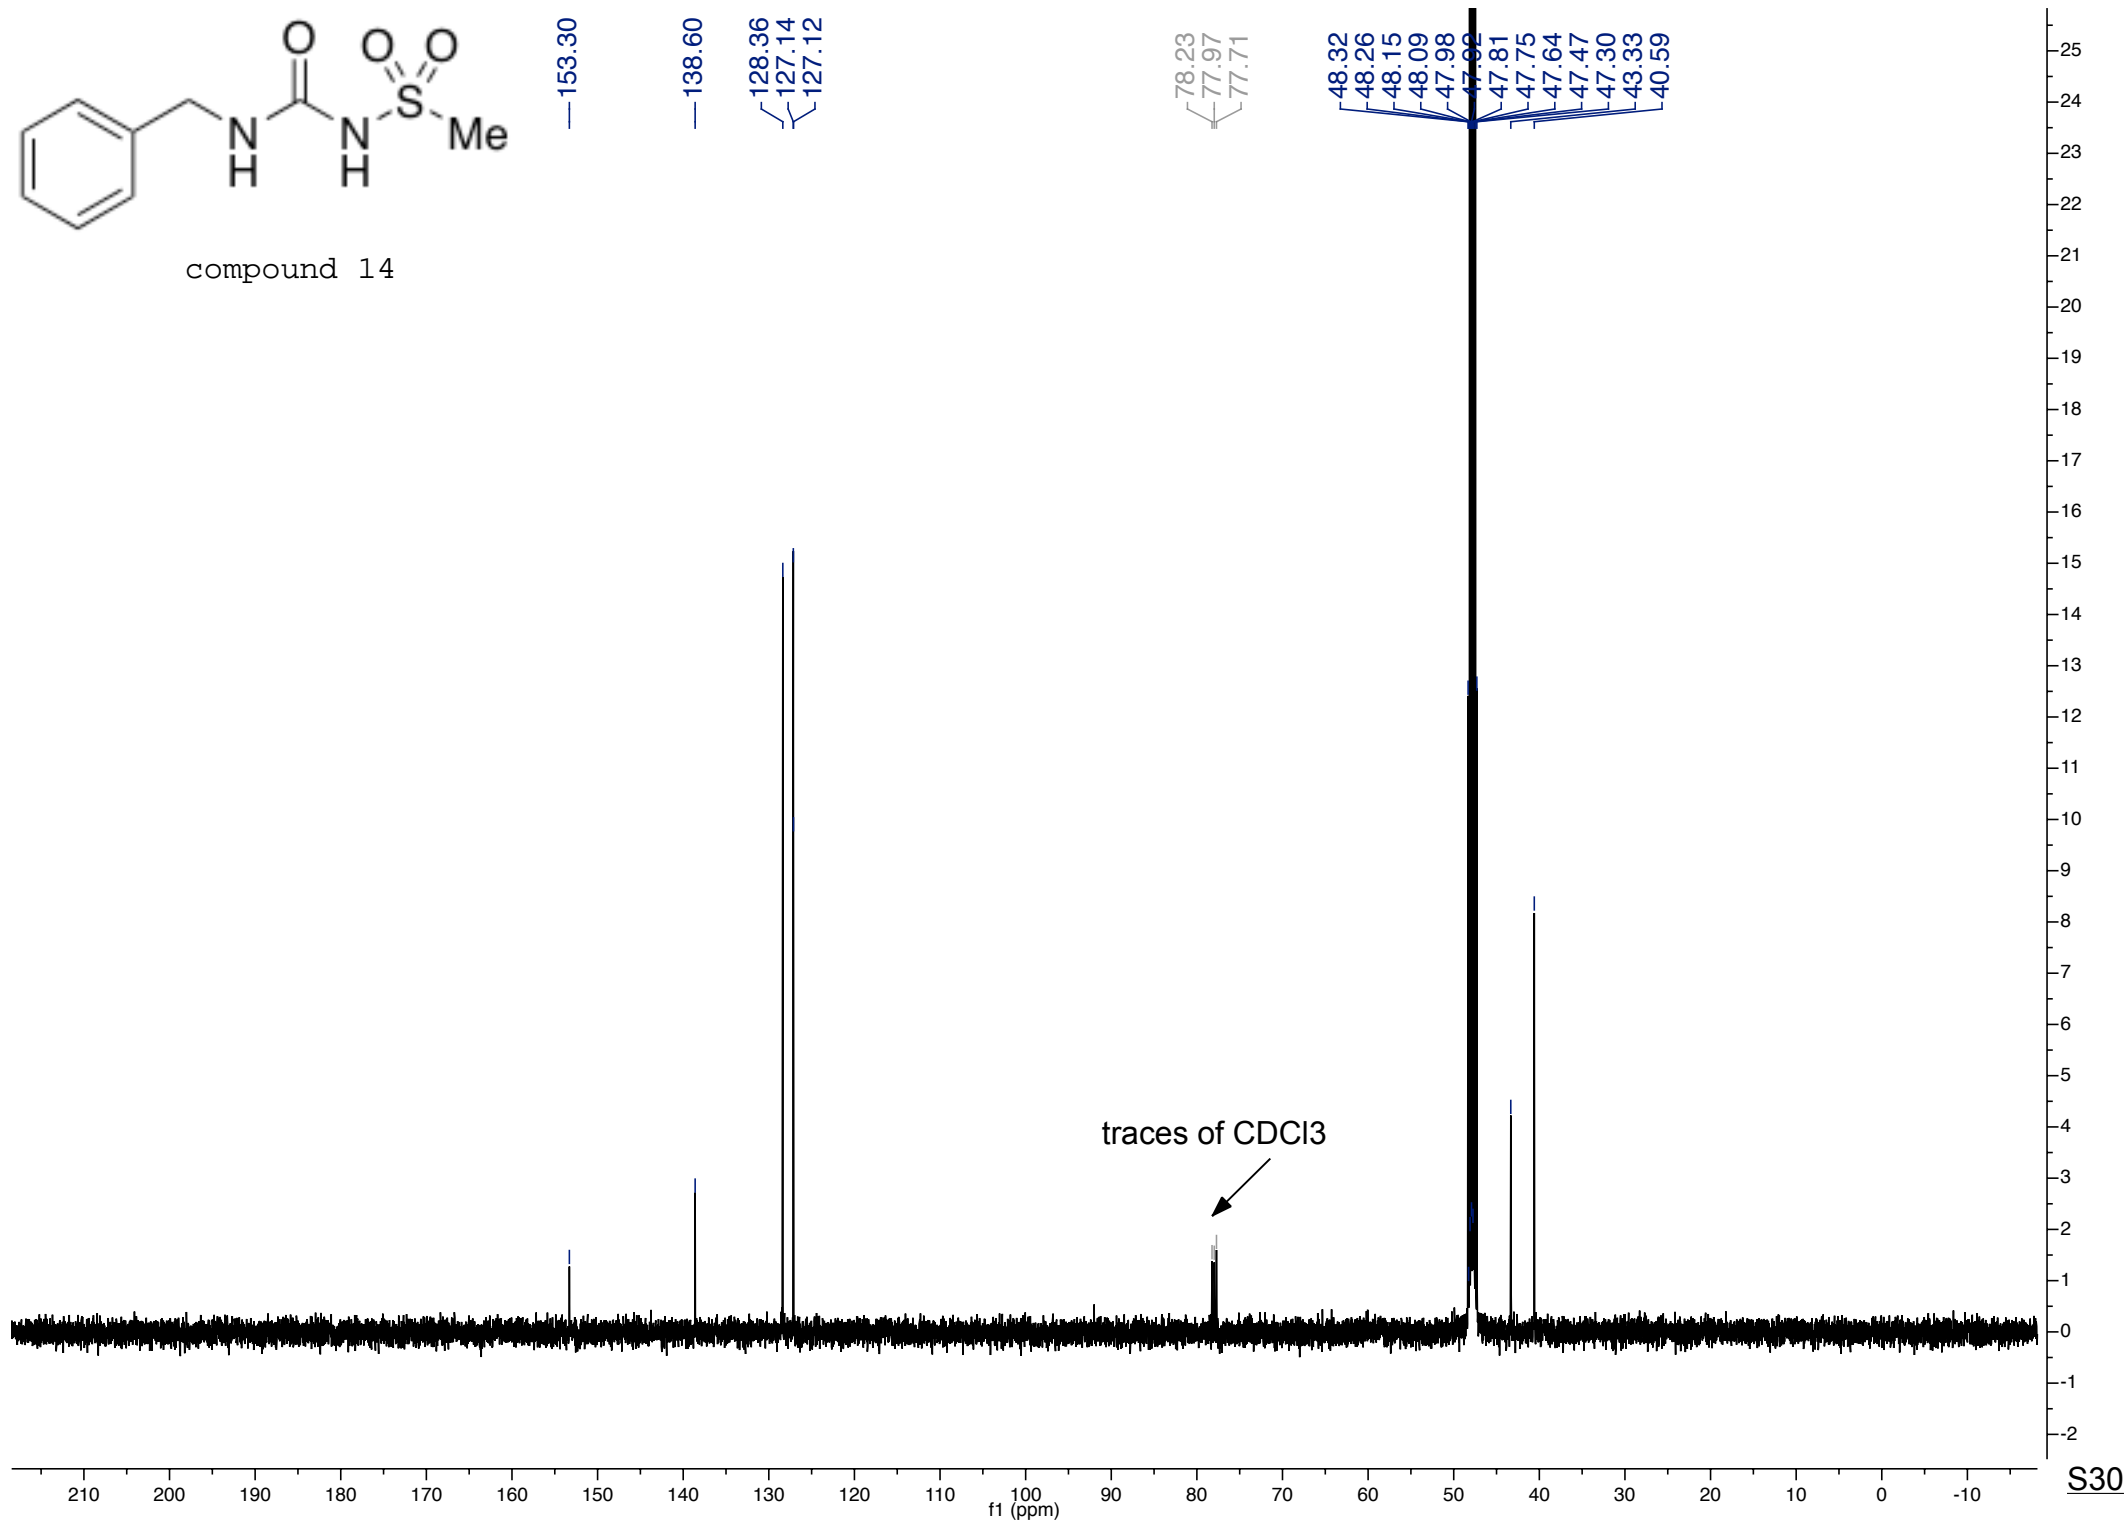

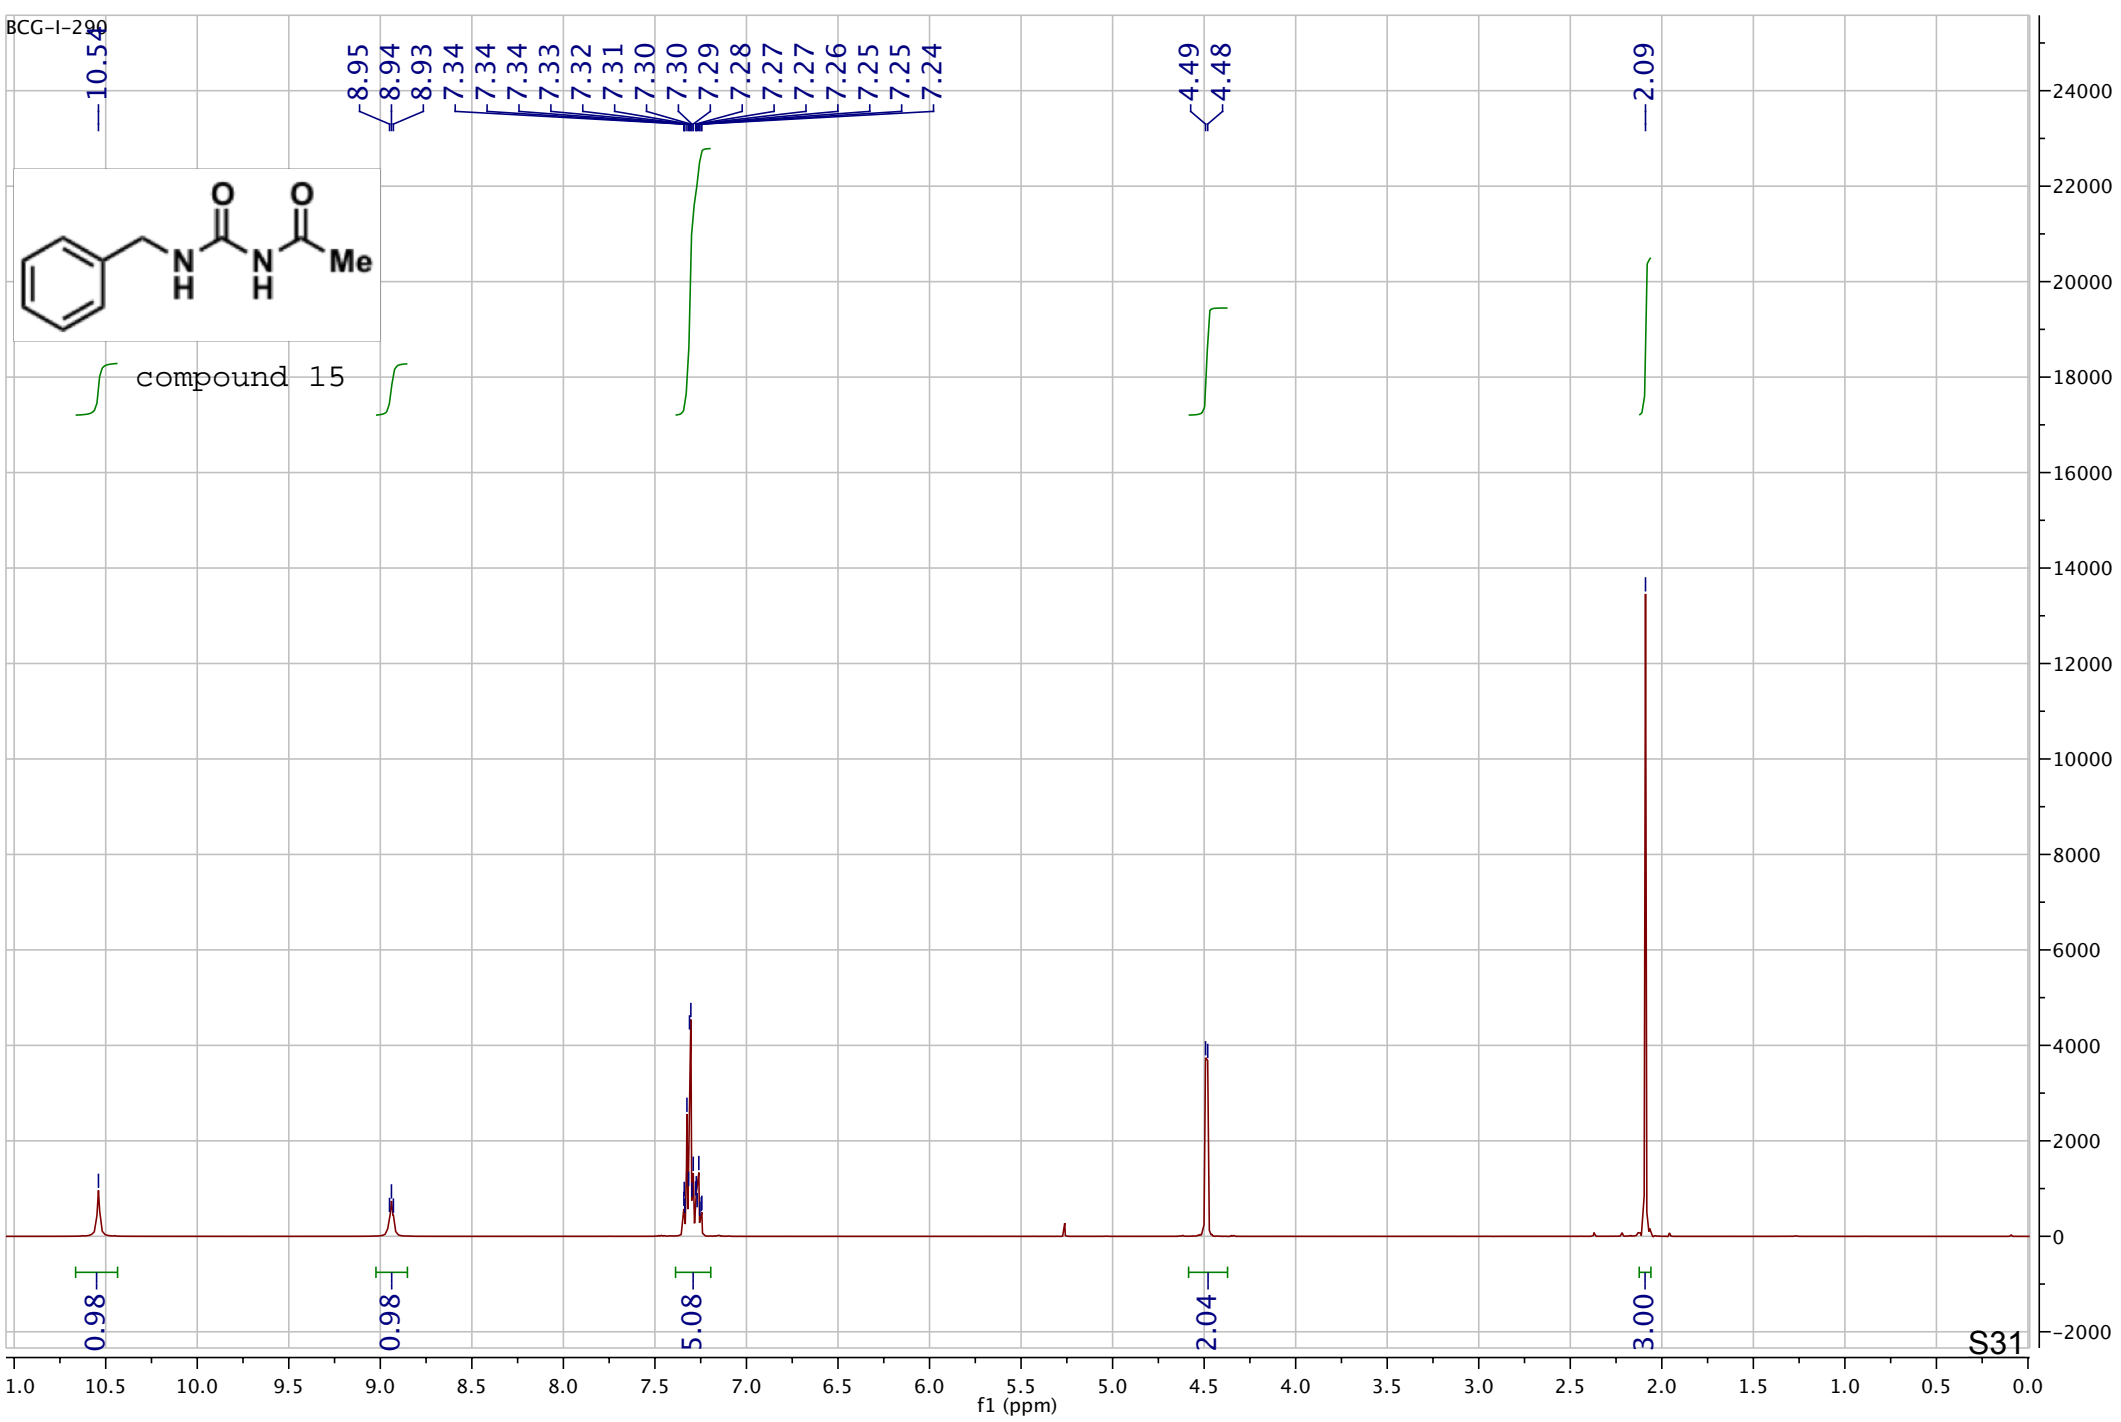

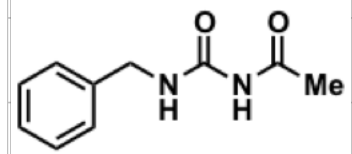

compound 15

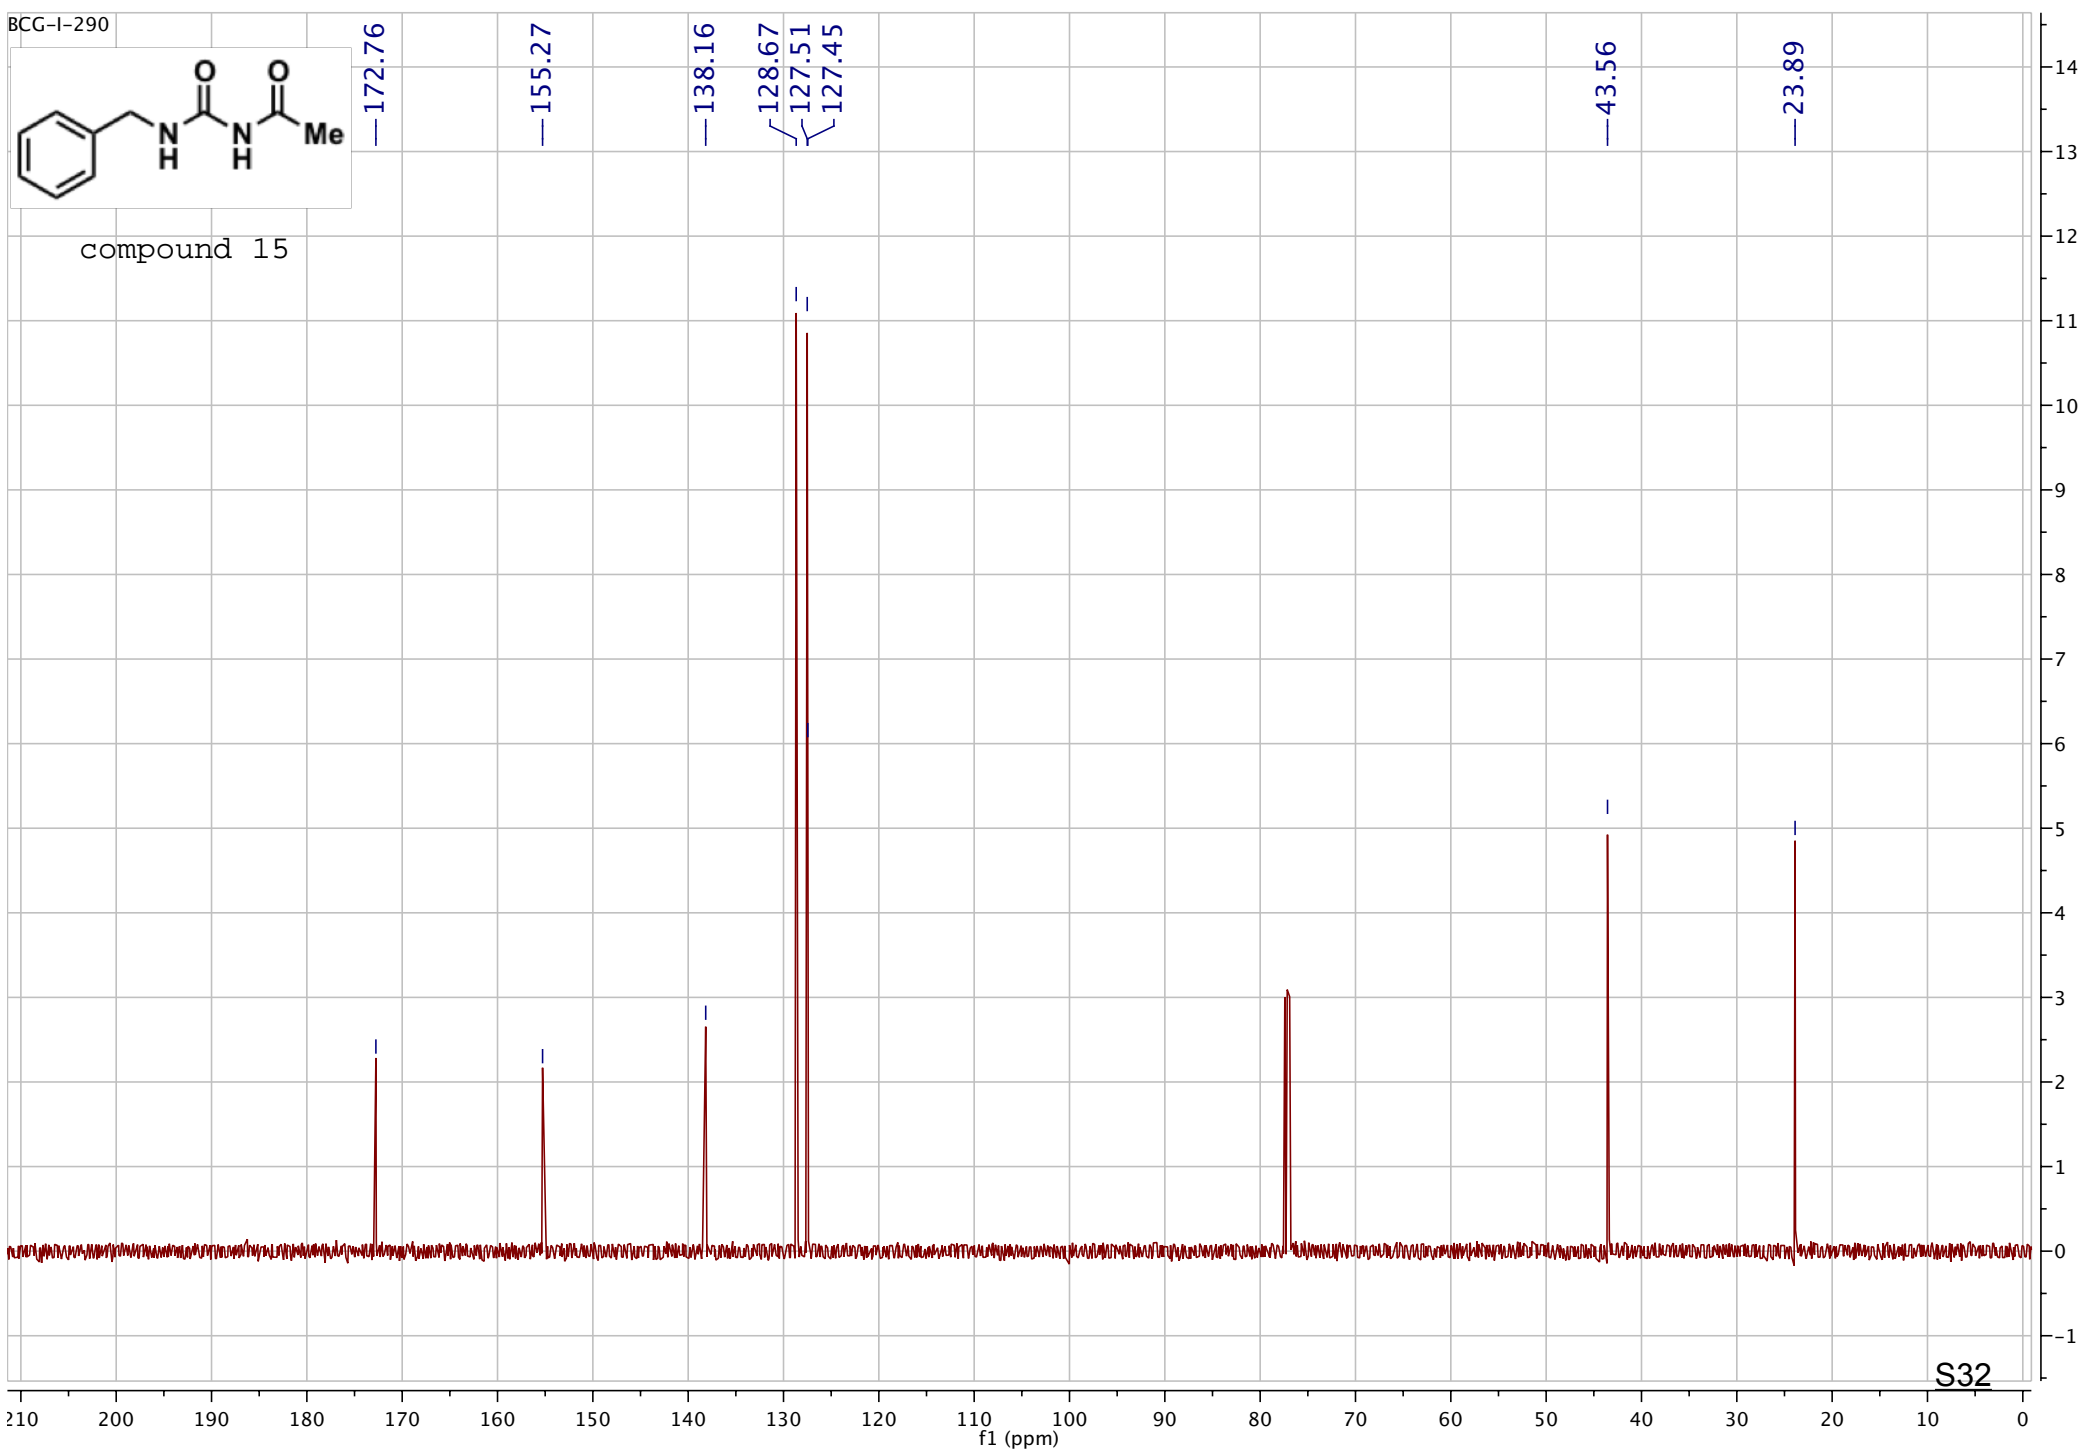



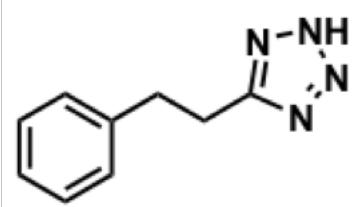

compound 16

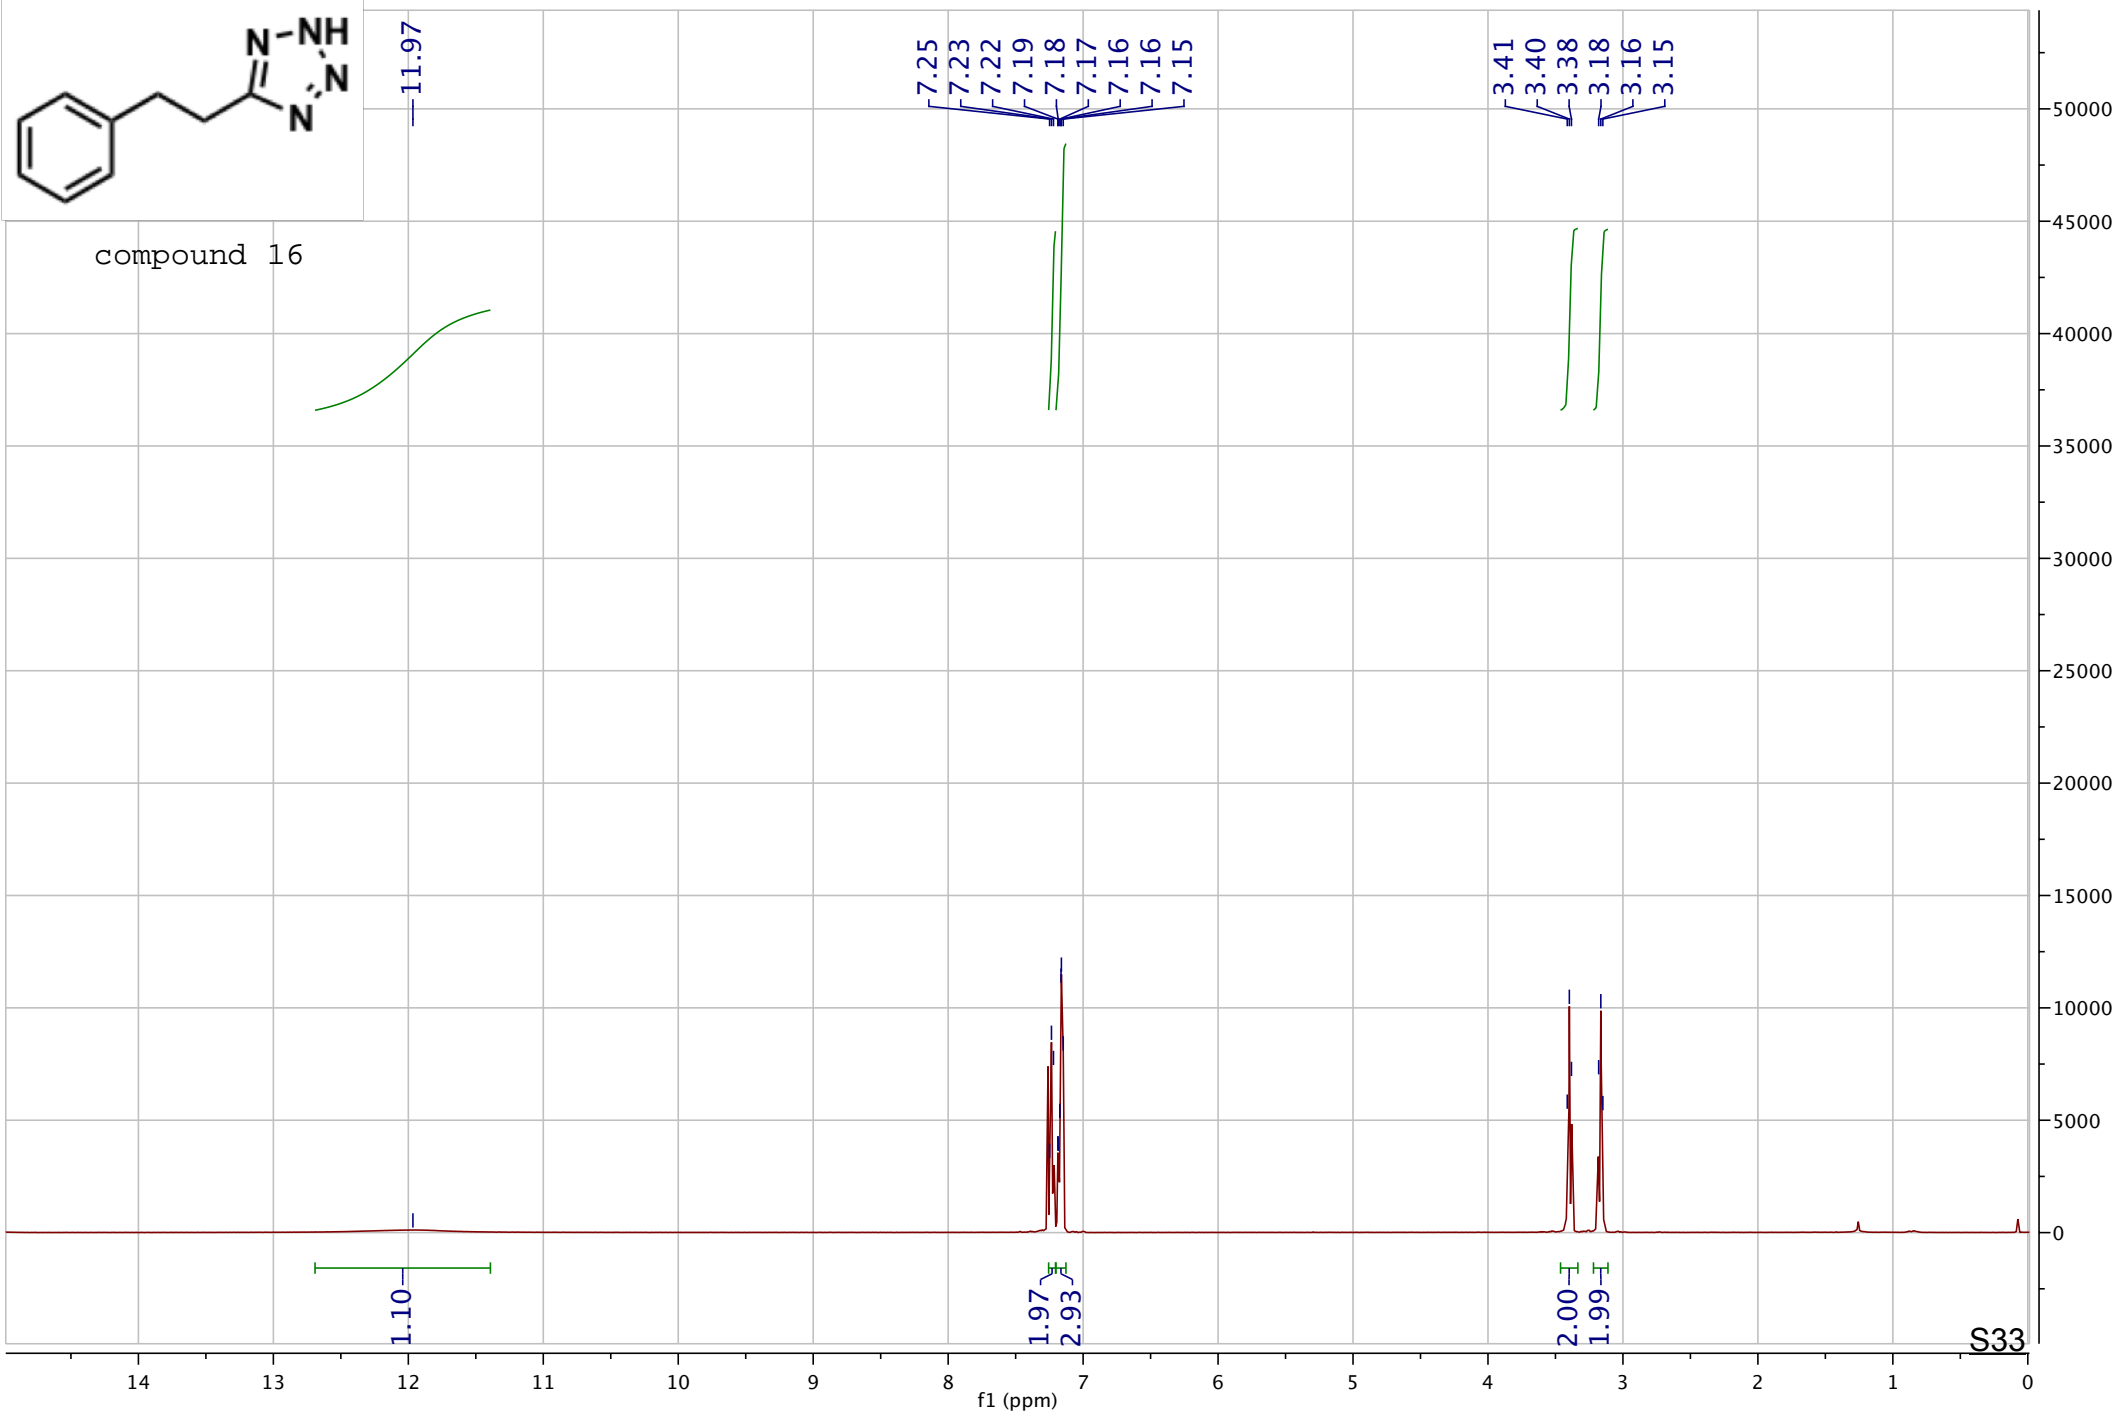

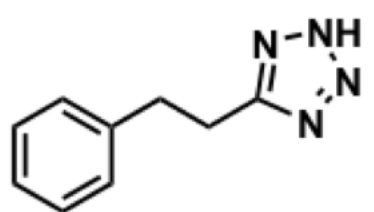

compound 16

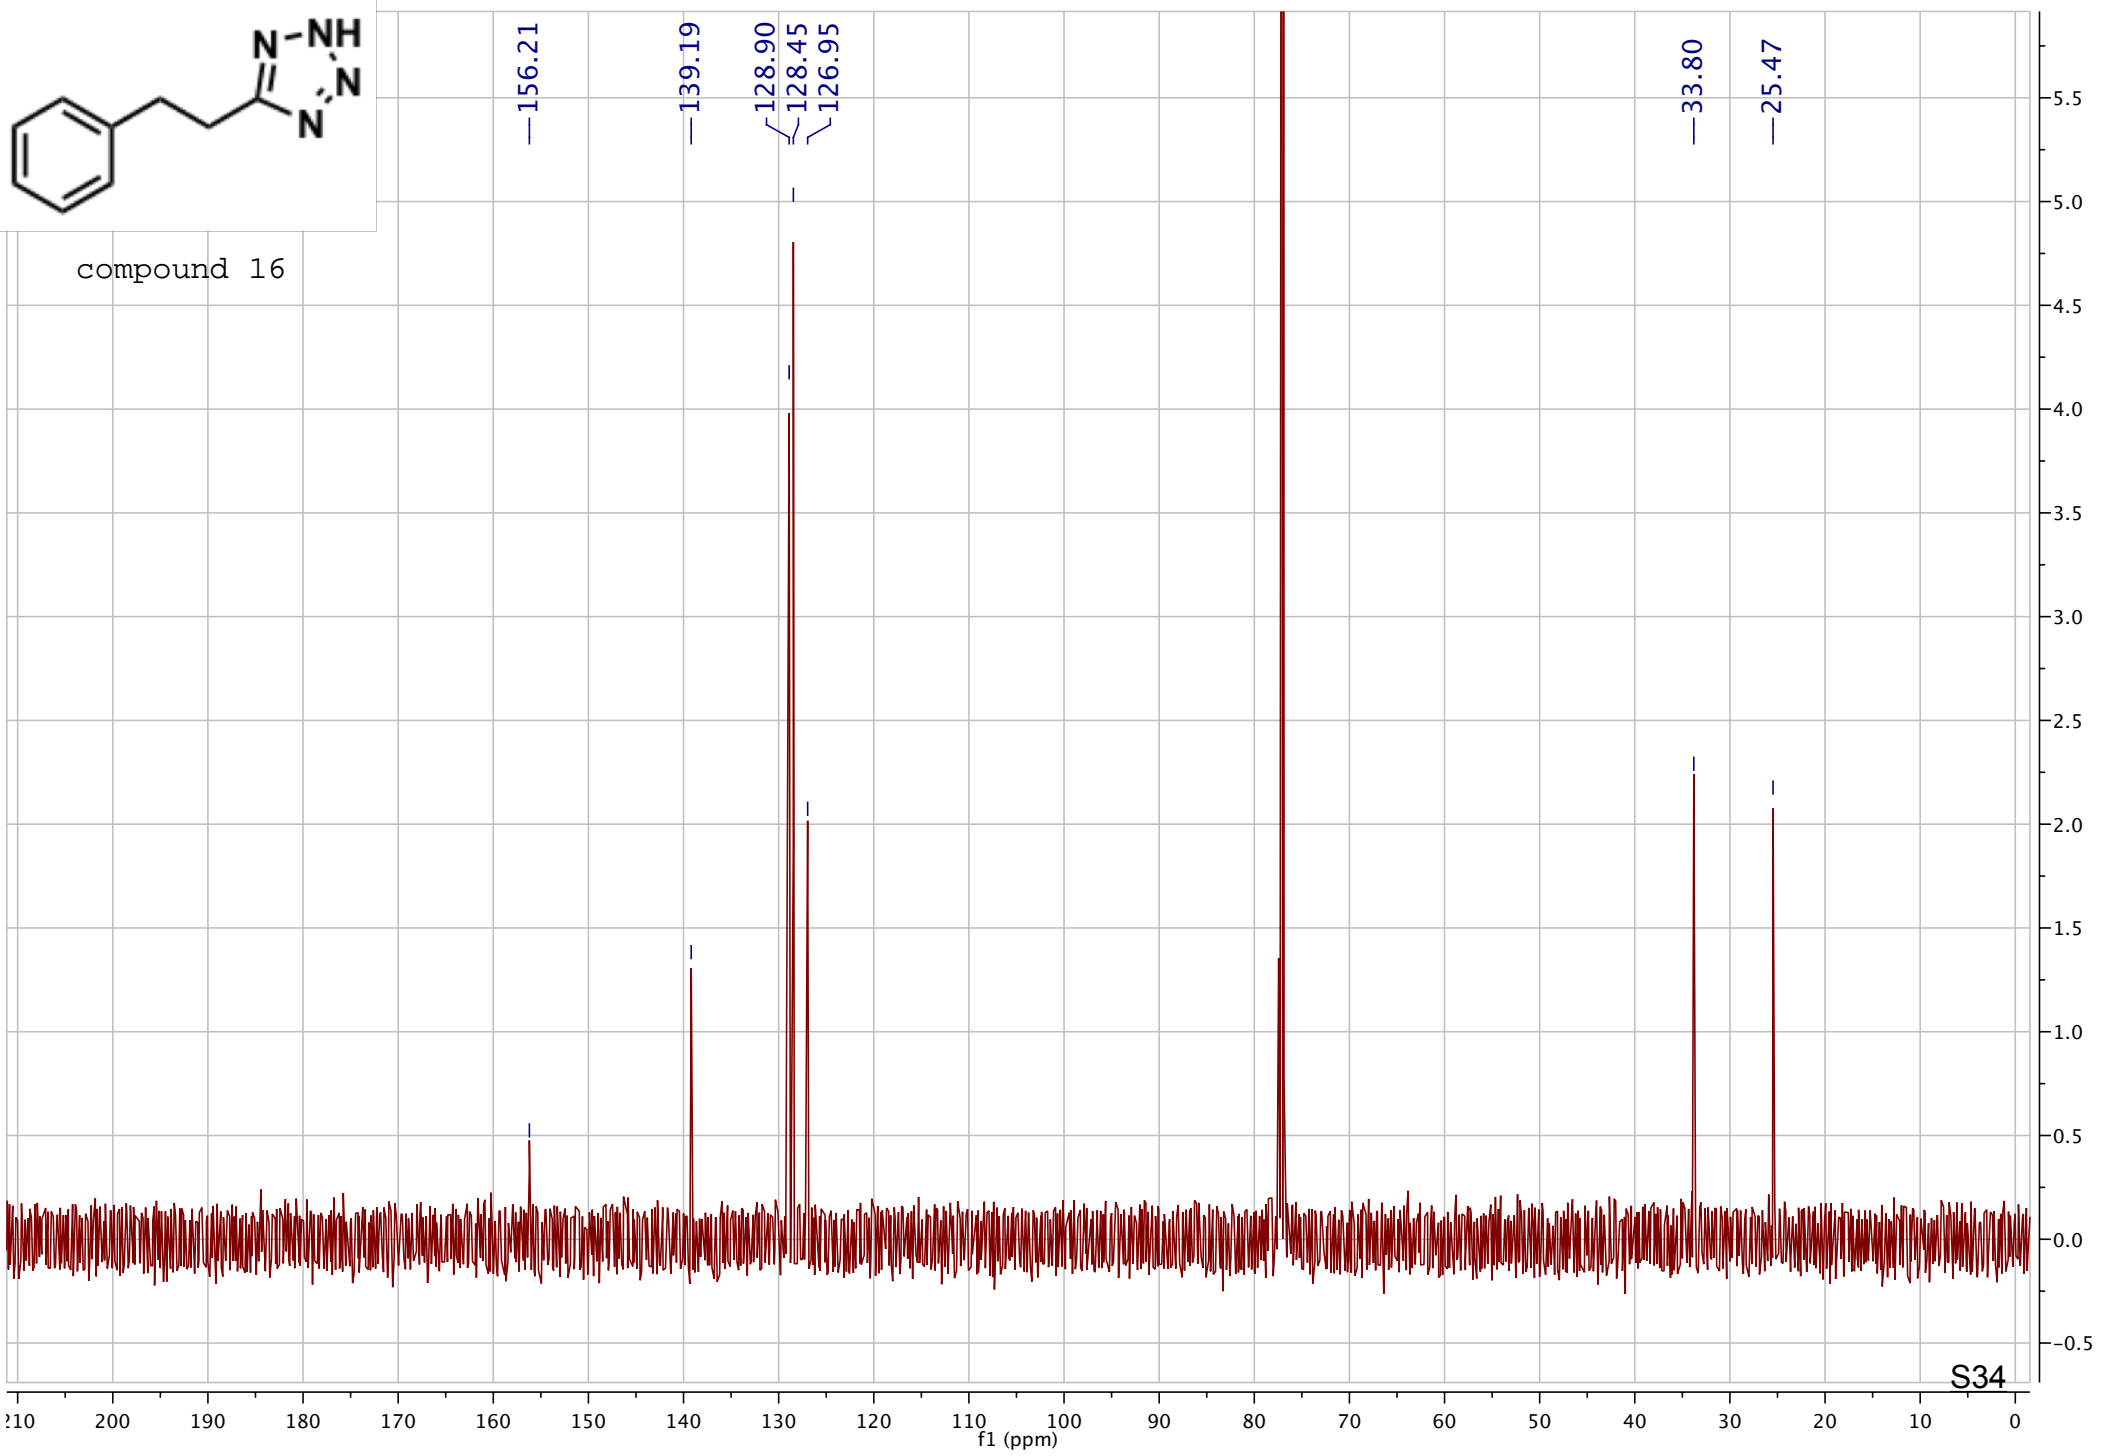

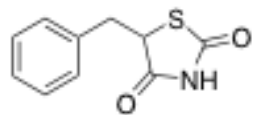

compound 17

8.898

7.352  
7.339  
7.324  
7.307  
7.293  
7.278  
7.260  
7.242  
7.228

4.557  
4.549  
4.537  
4.530

3.576  
3.568  
3.547  
3.540  
3.157  
3.137  
3.129  
3.109

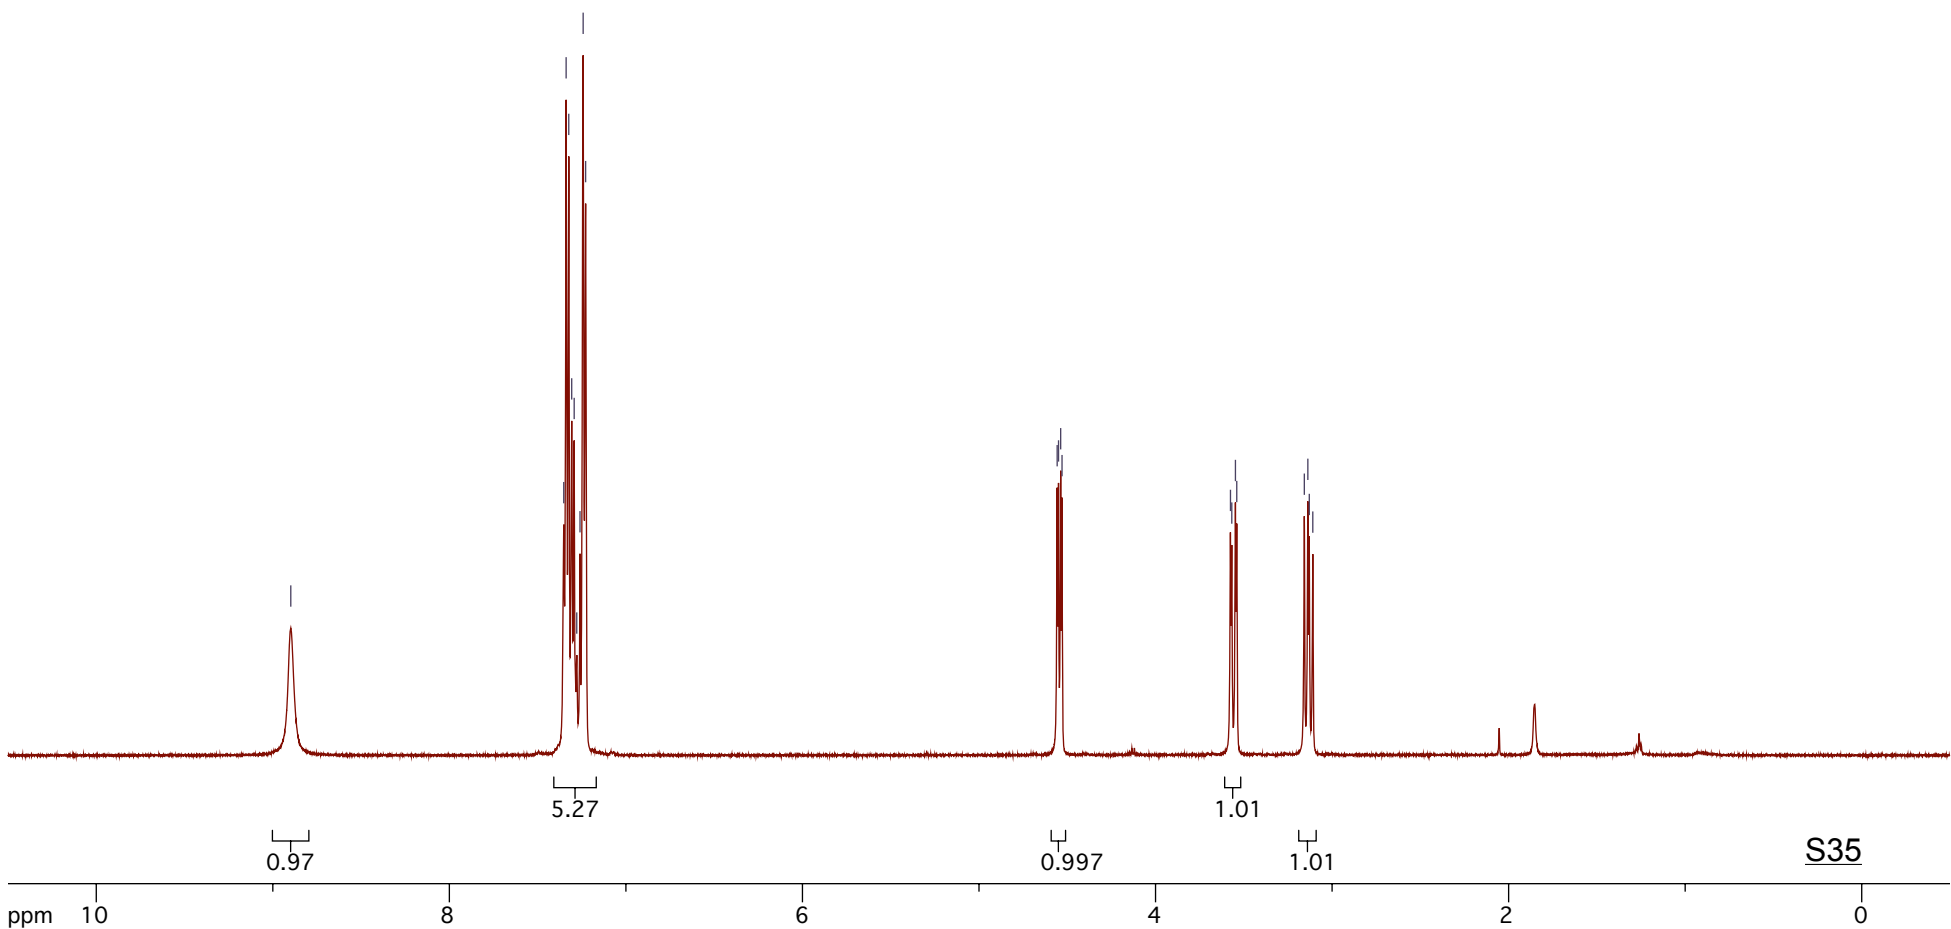

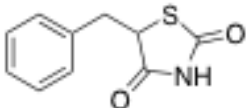

compound 17

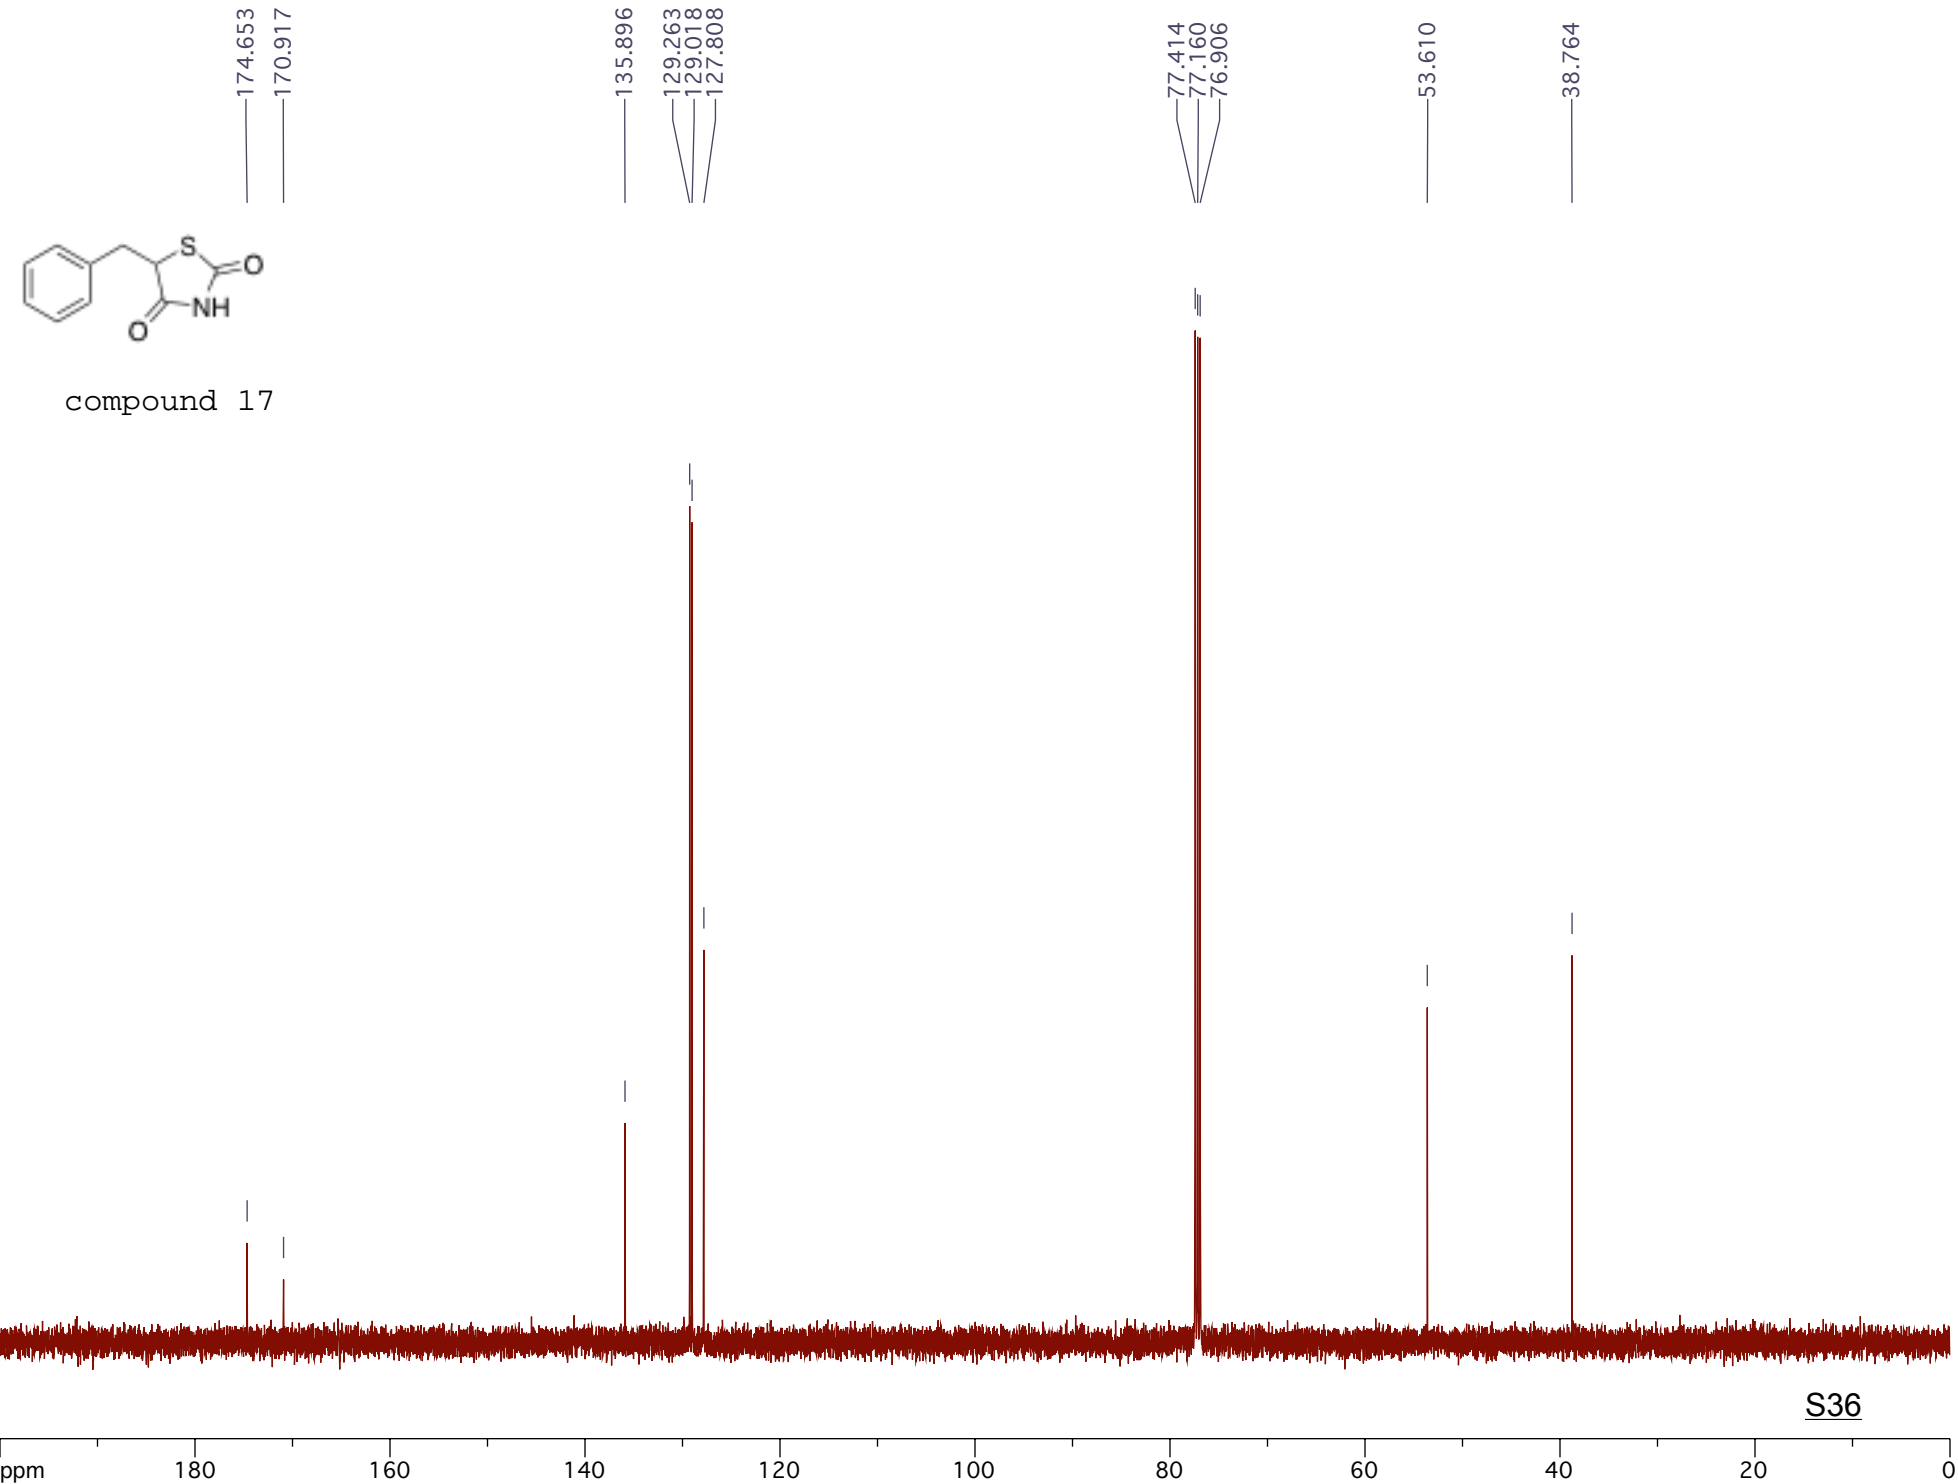

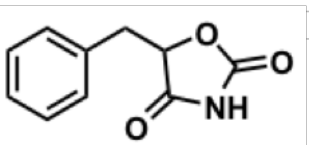

compound 18

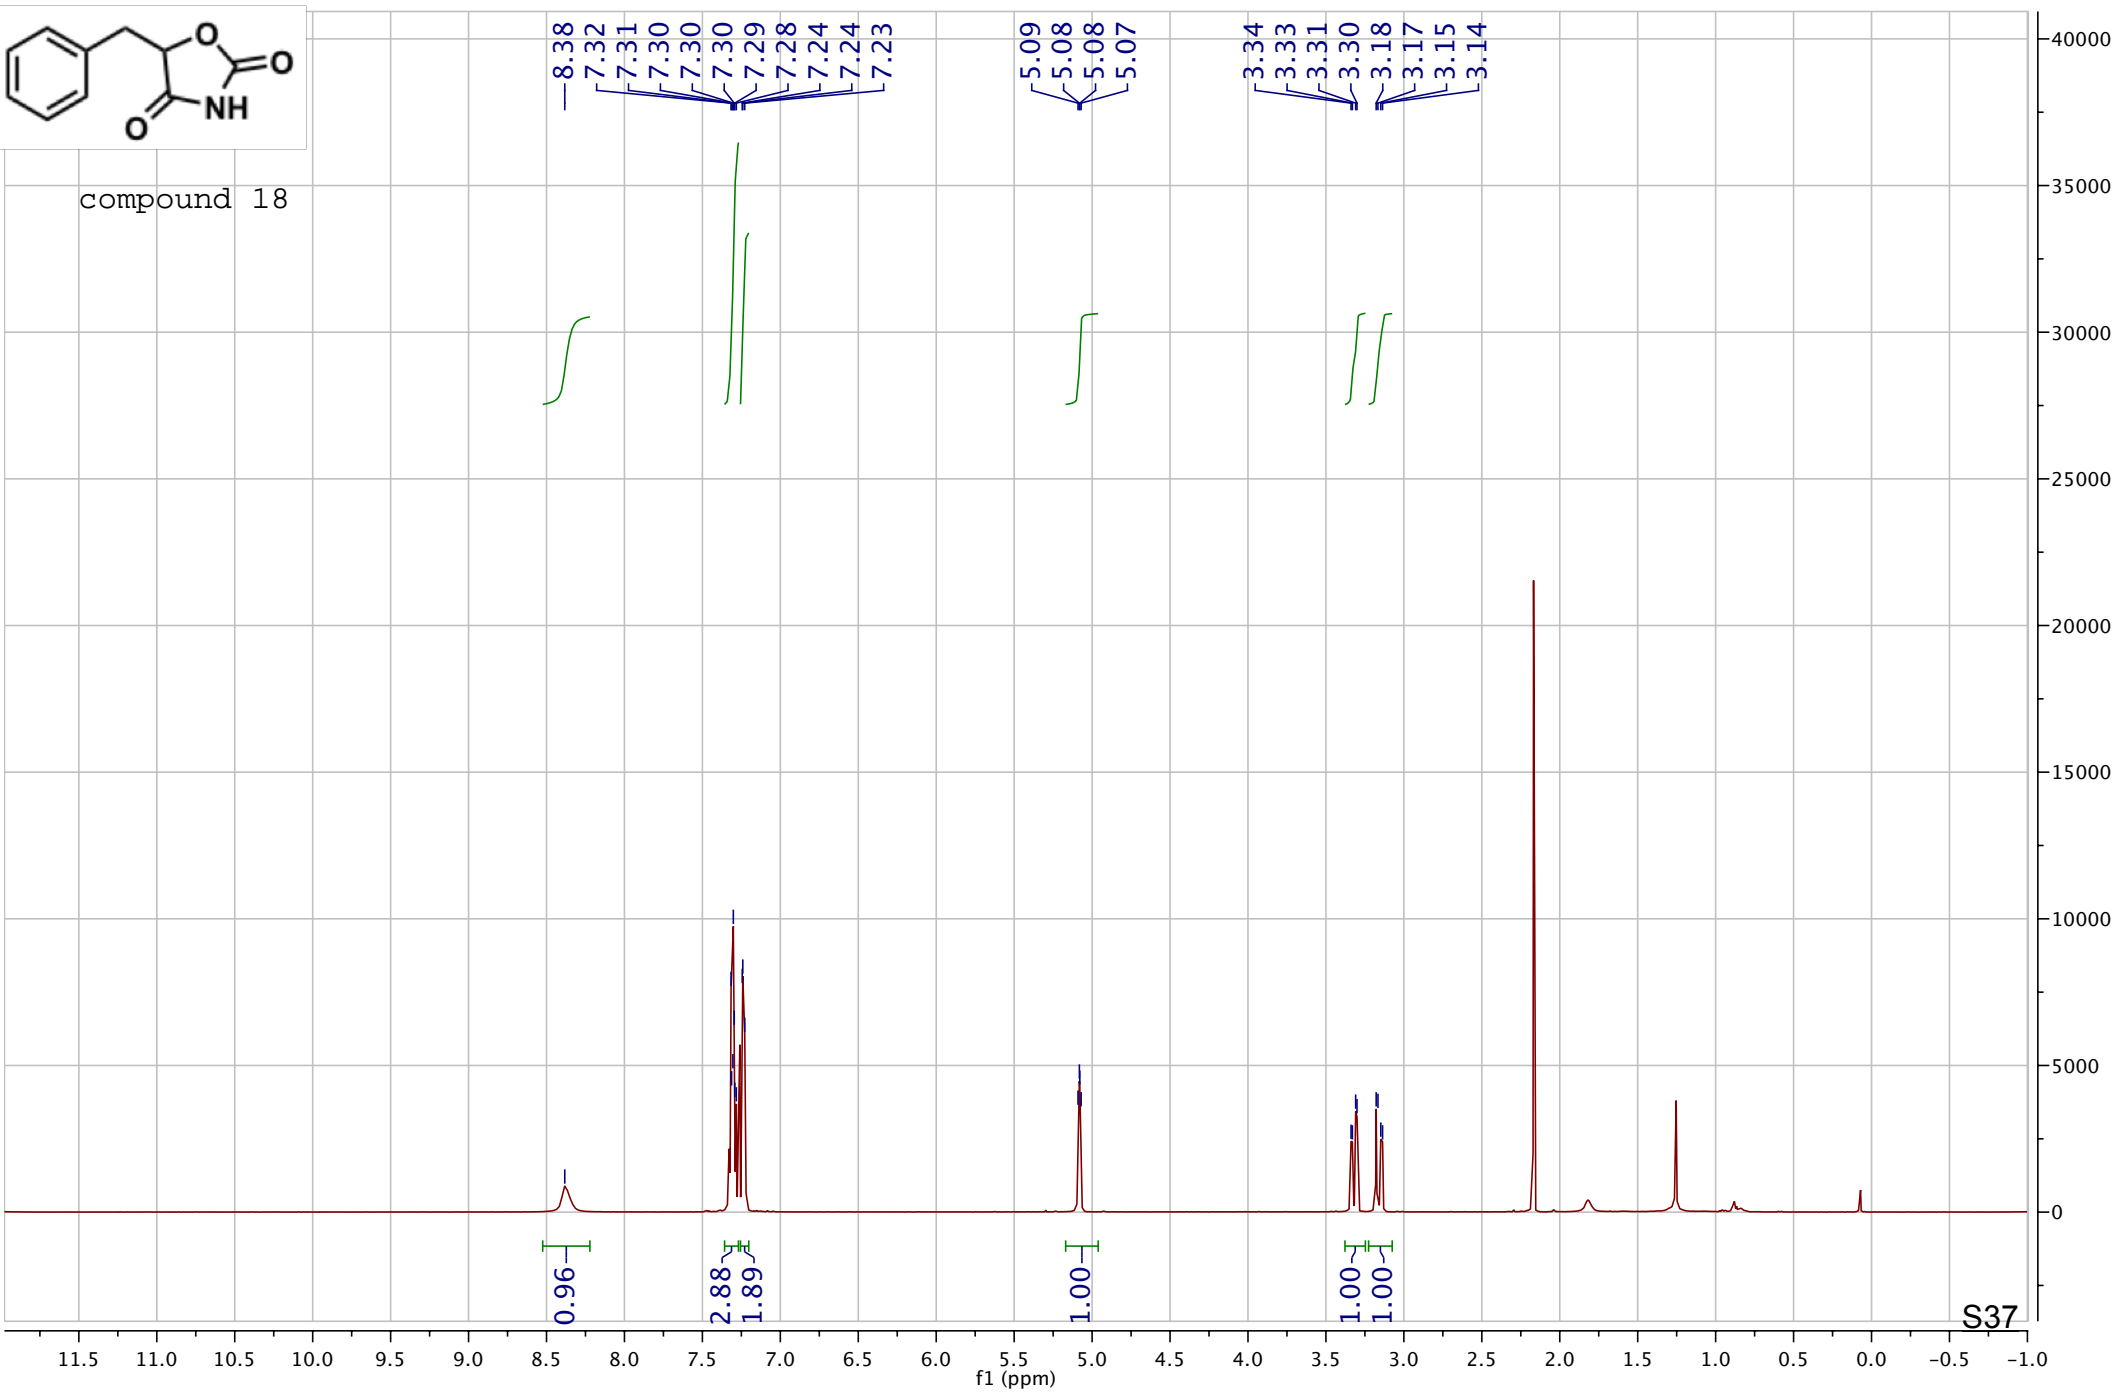

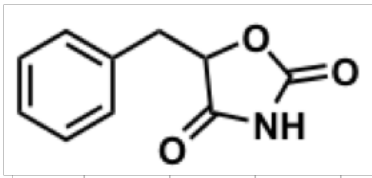

compound 18

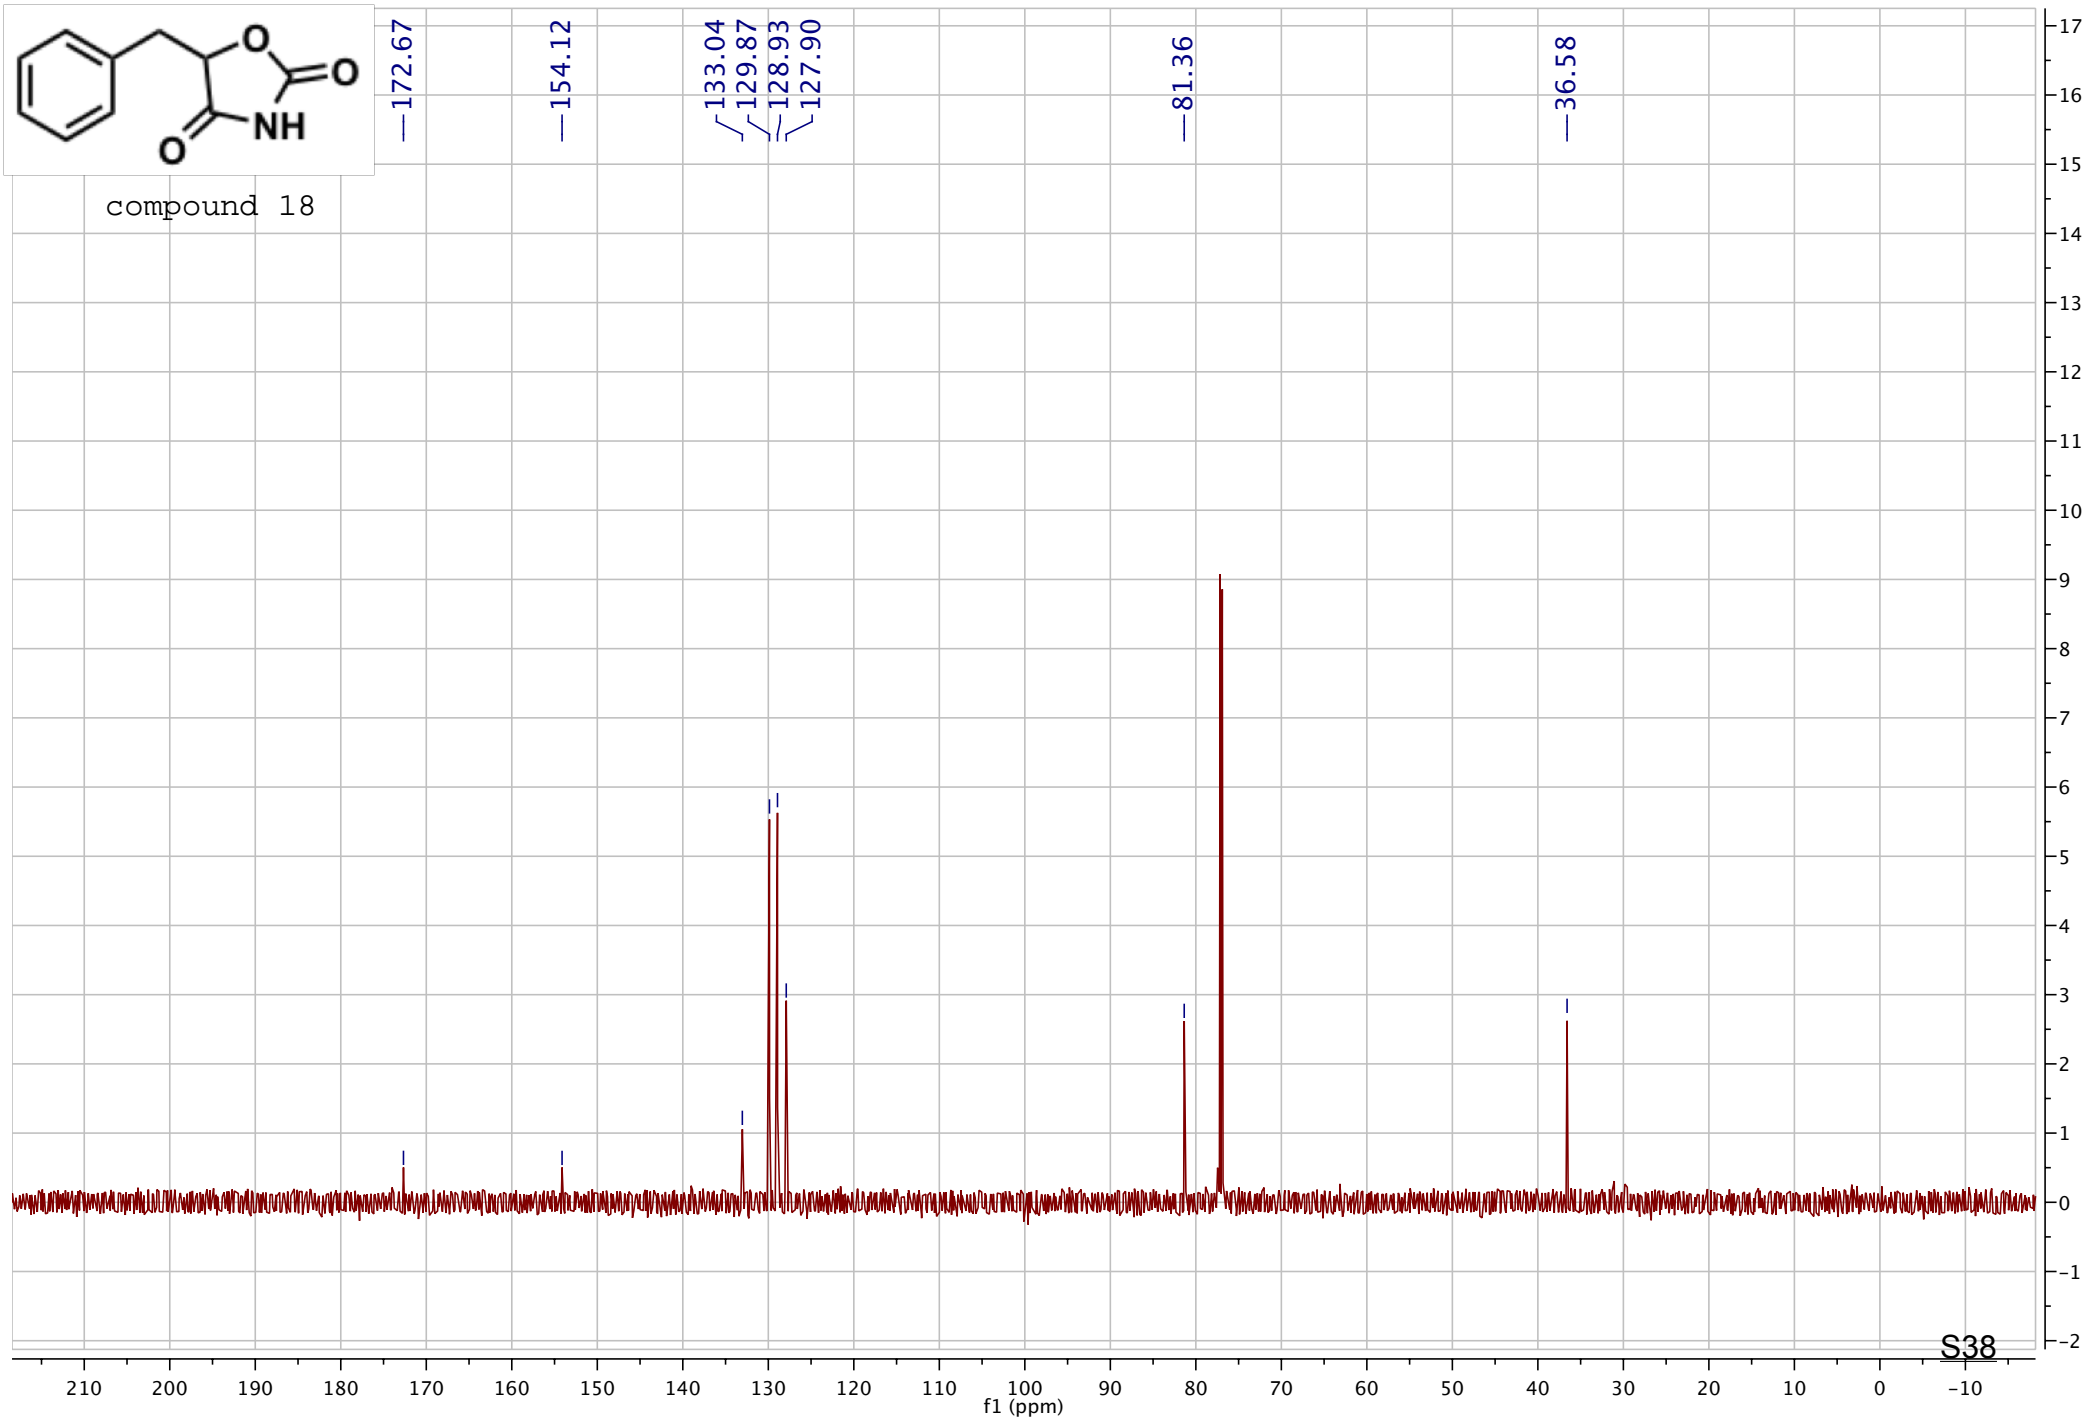

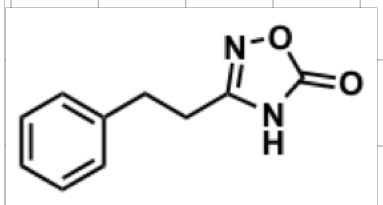

compound 19

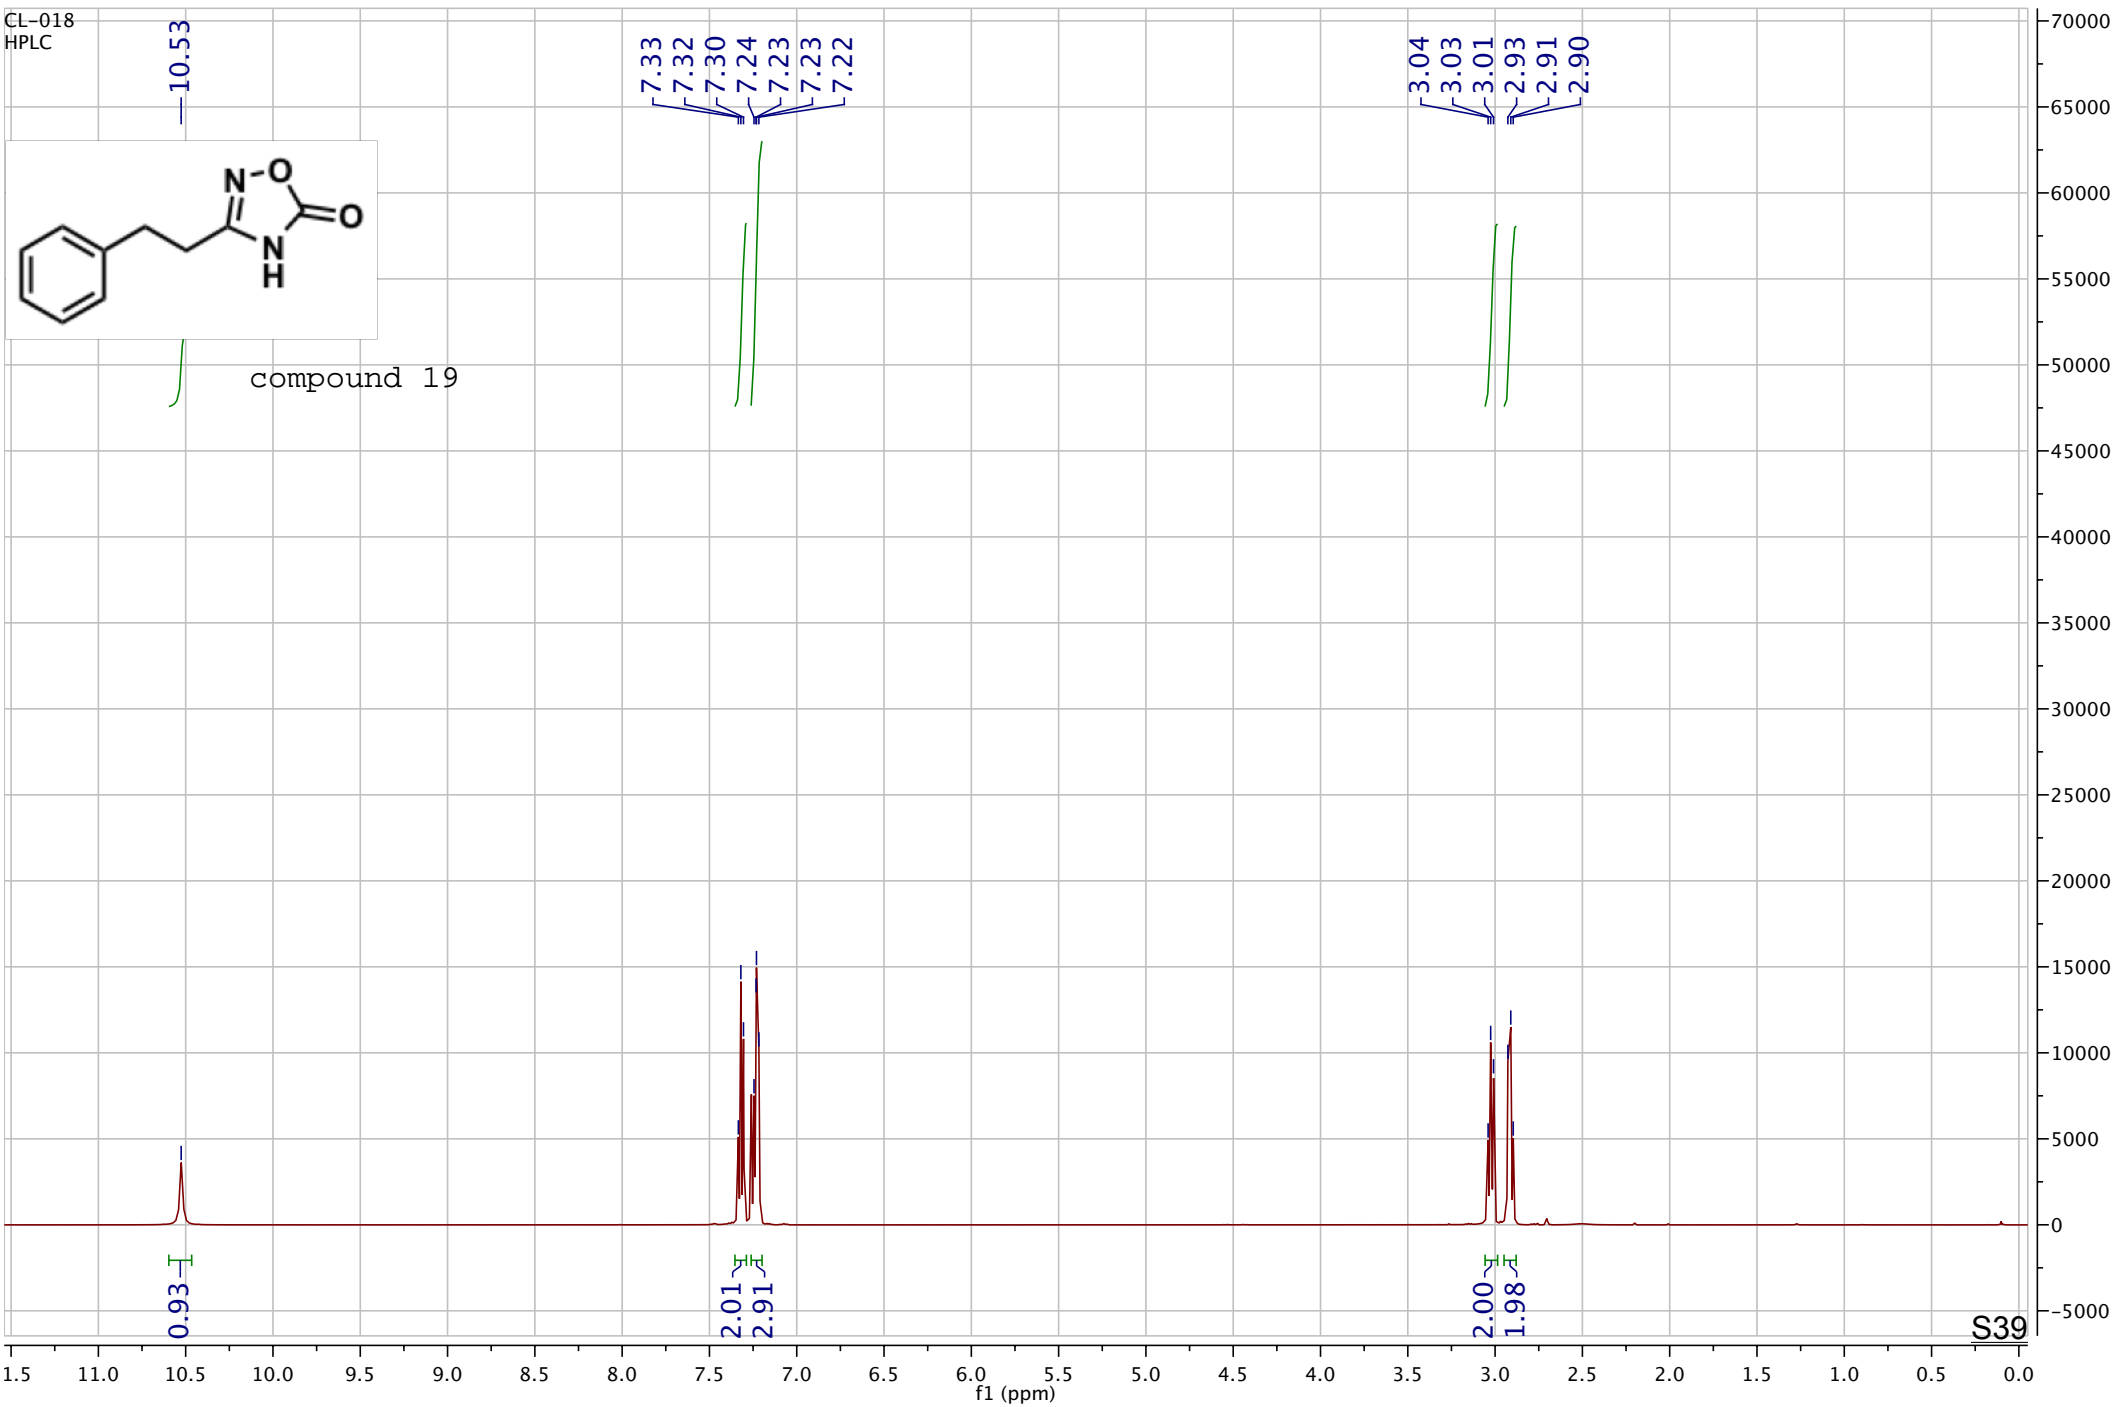

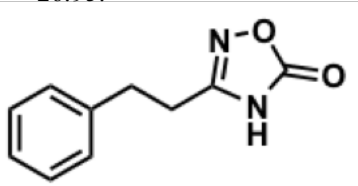

compound 19

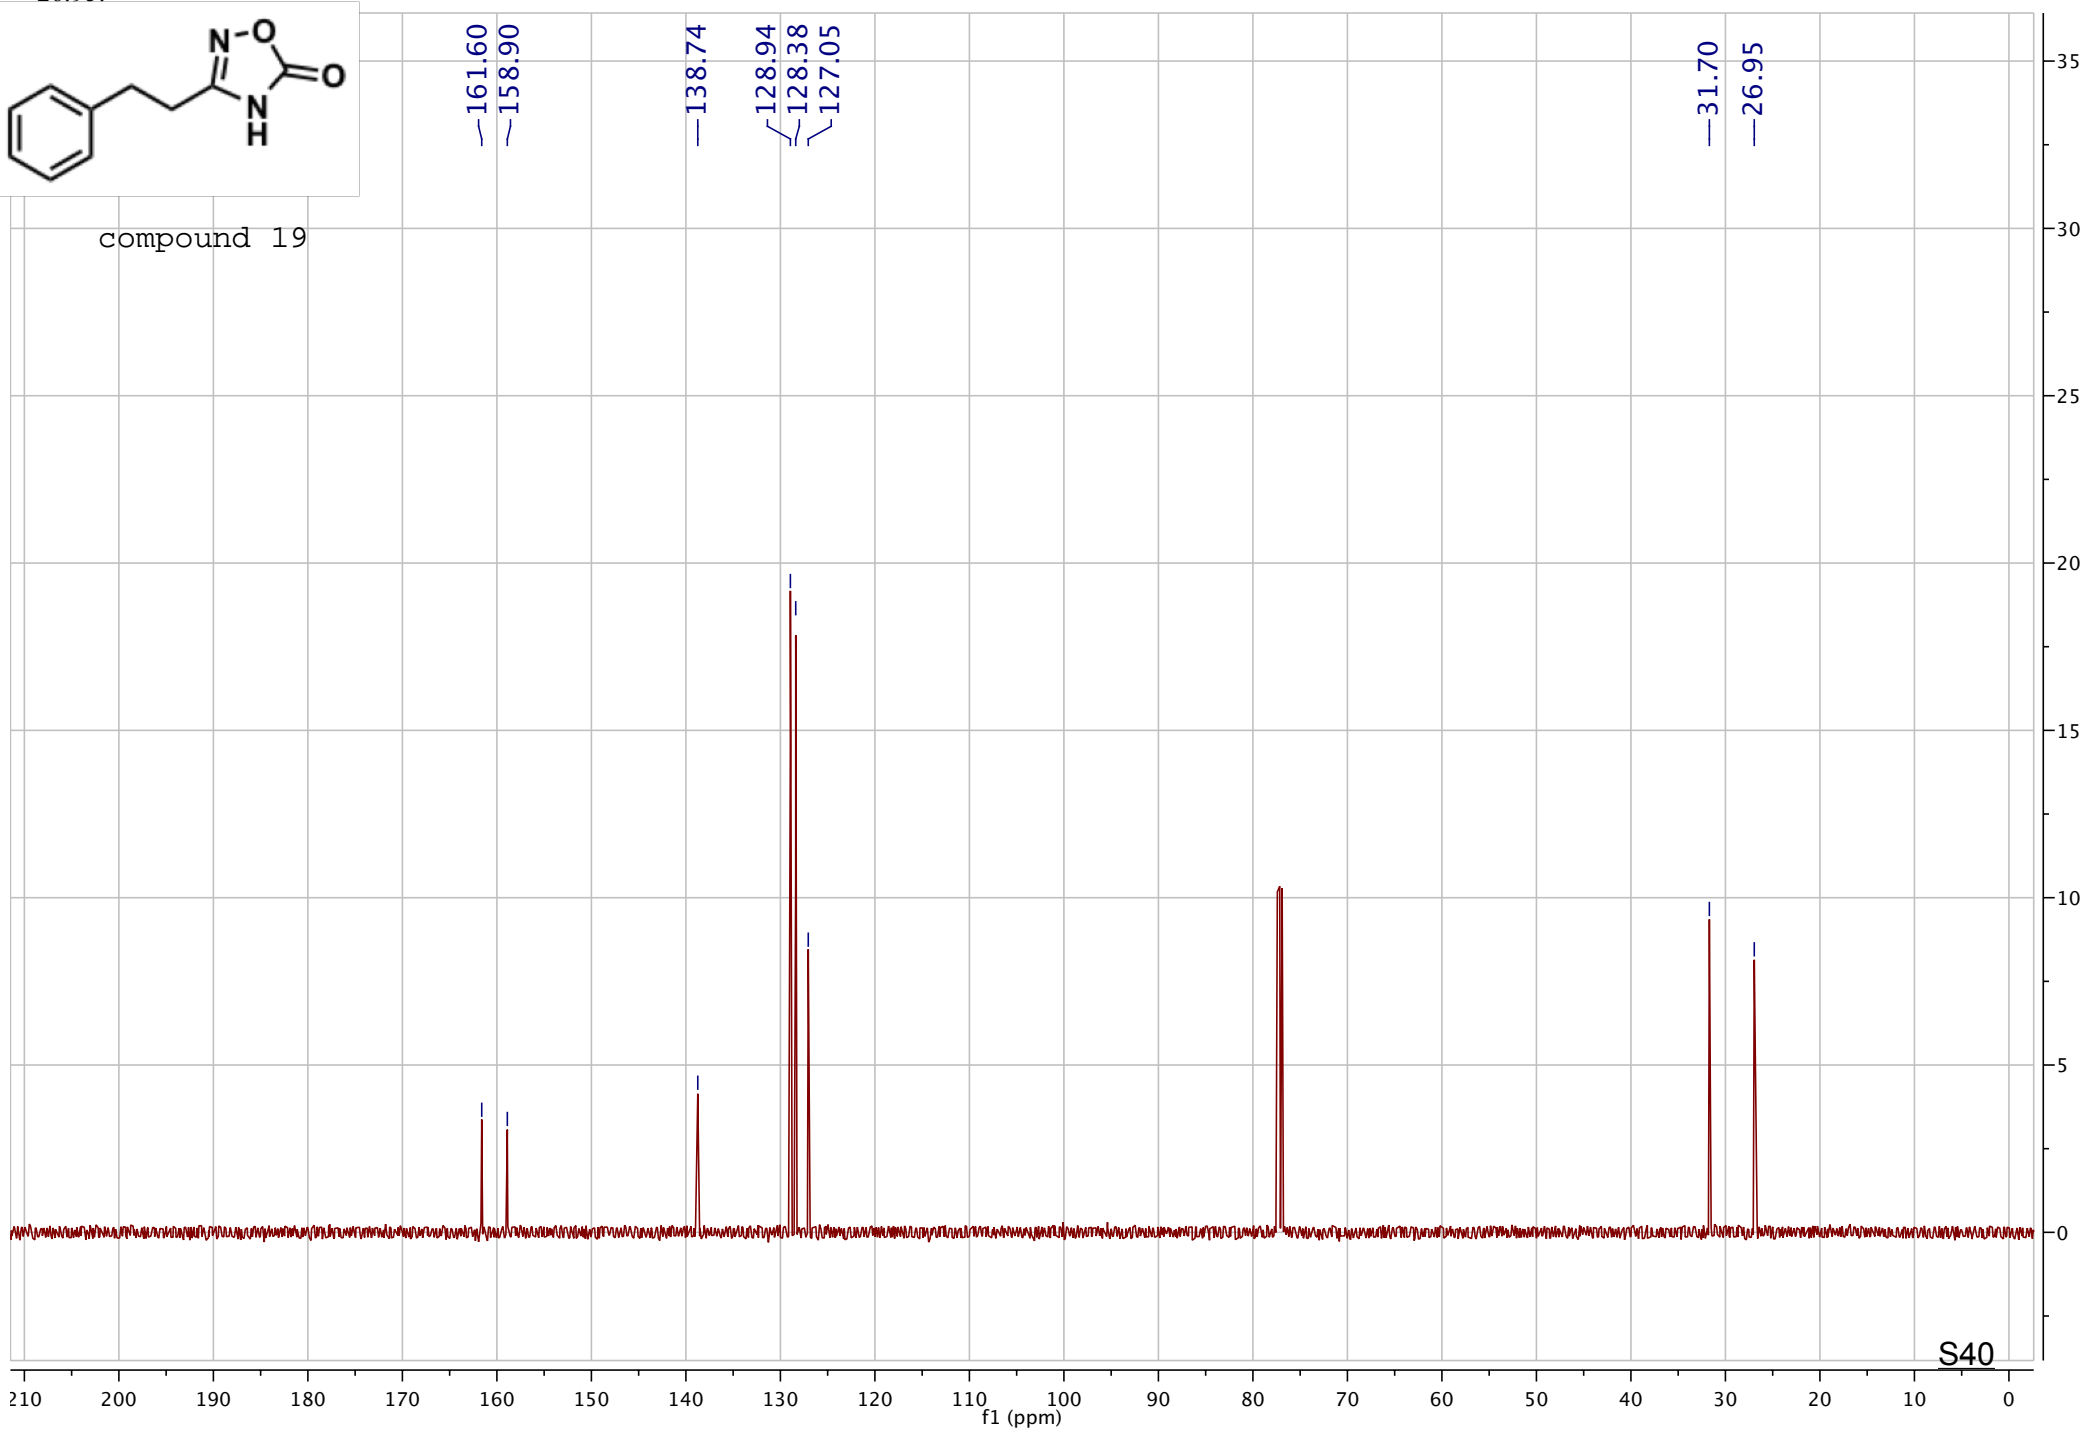



11.432  
11.431

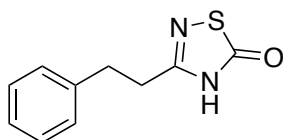

compound 20

7.323  
7.308  
7.293  
7.260  
7.242  
7.228  
7.219  
7.213  
7.205

3.076  
3.062  
3.045  
2.937  
2.923  
2.920  
2.905

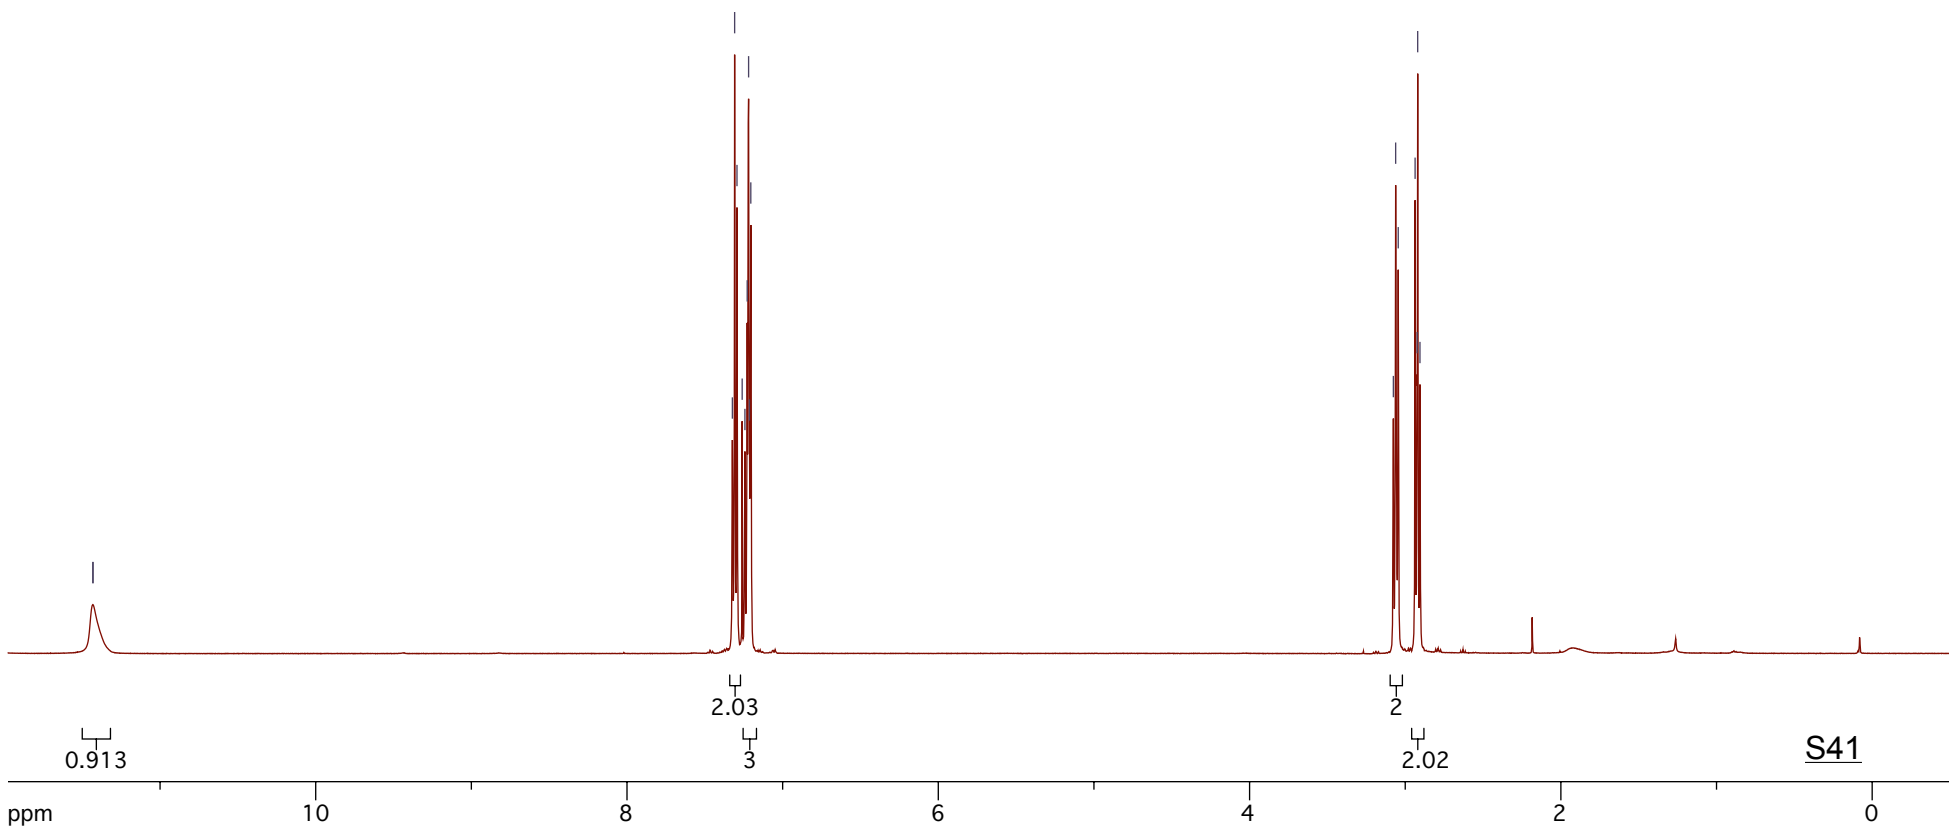

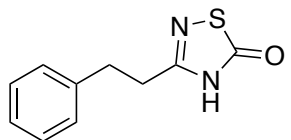

compound 20

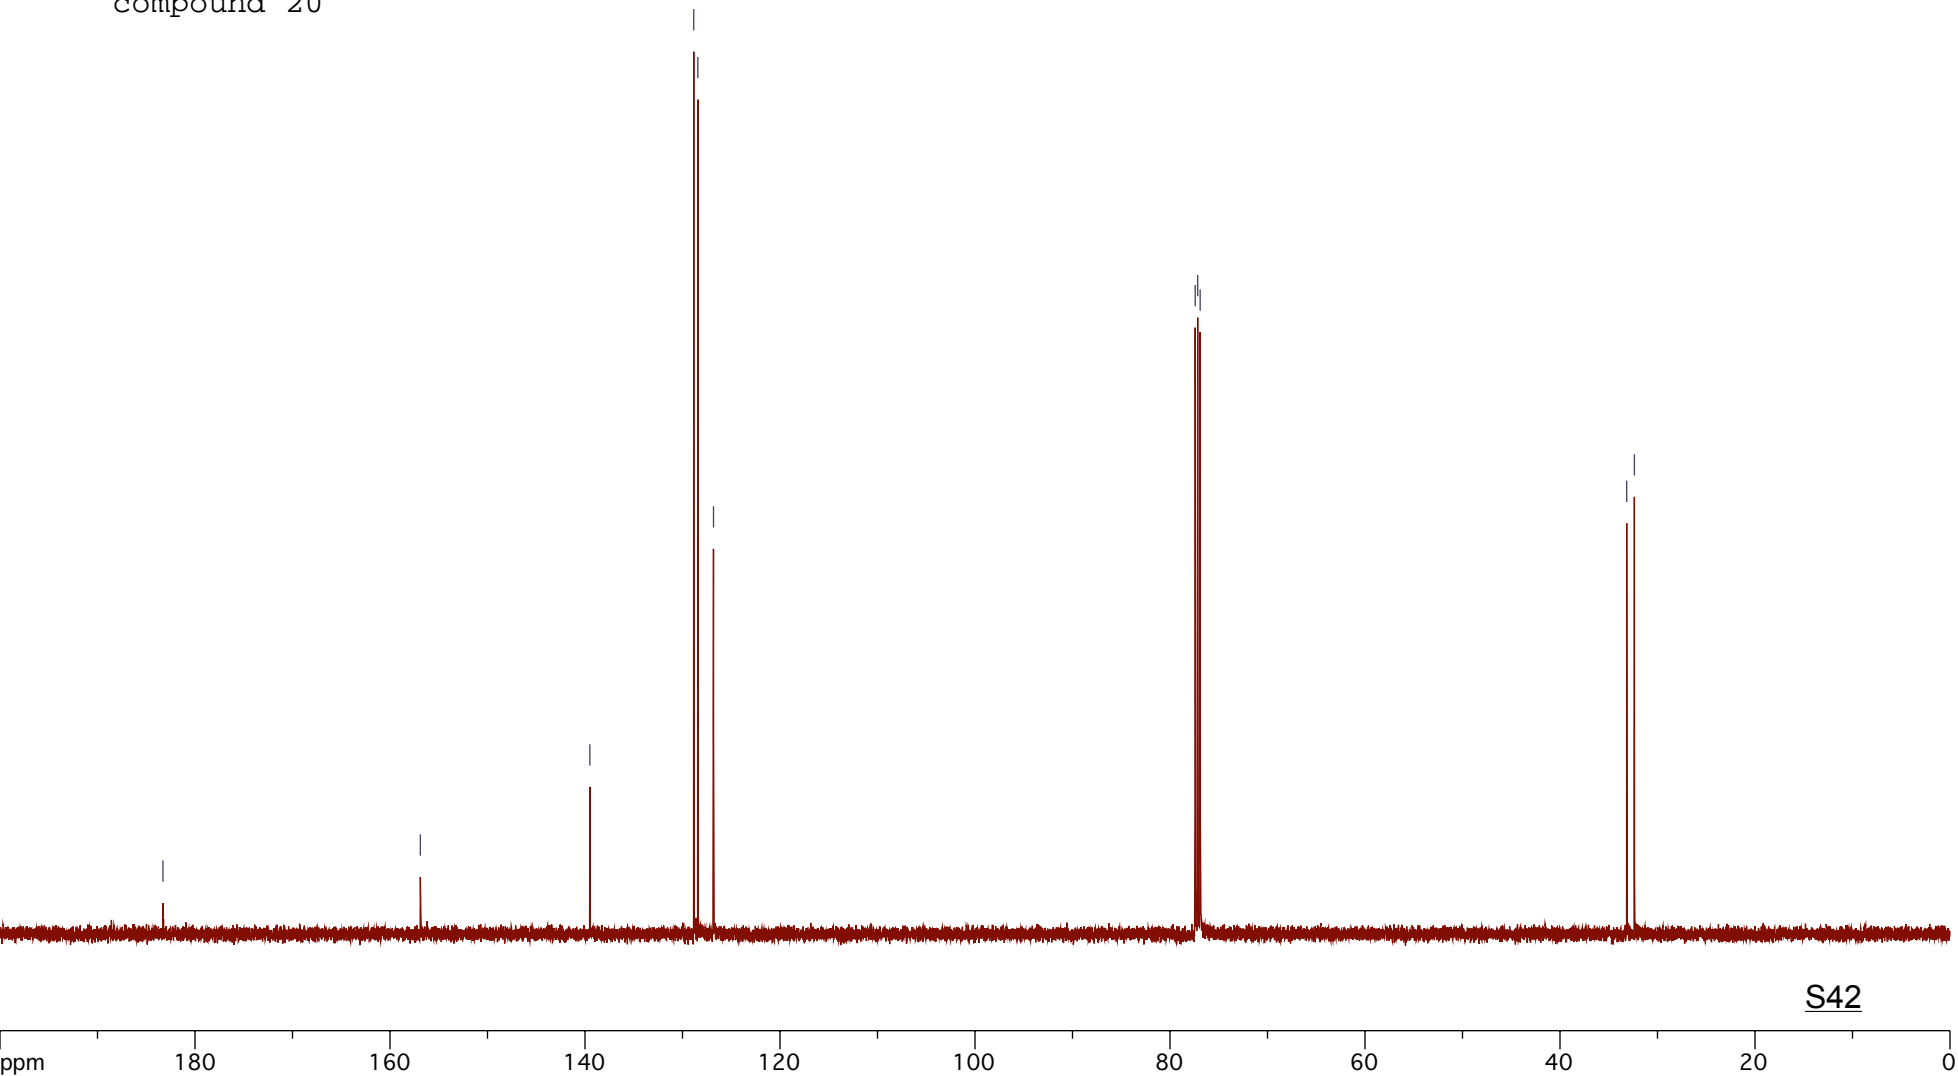

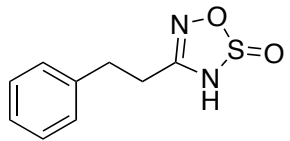

compound 21

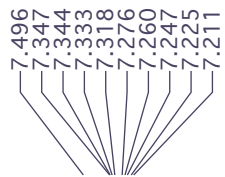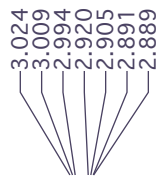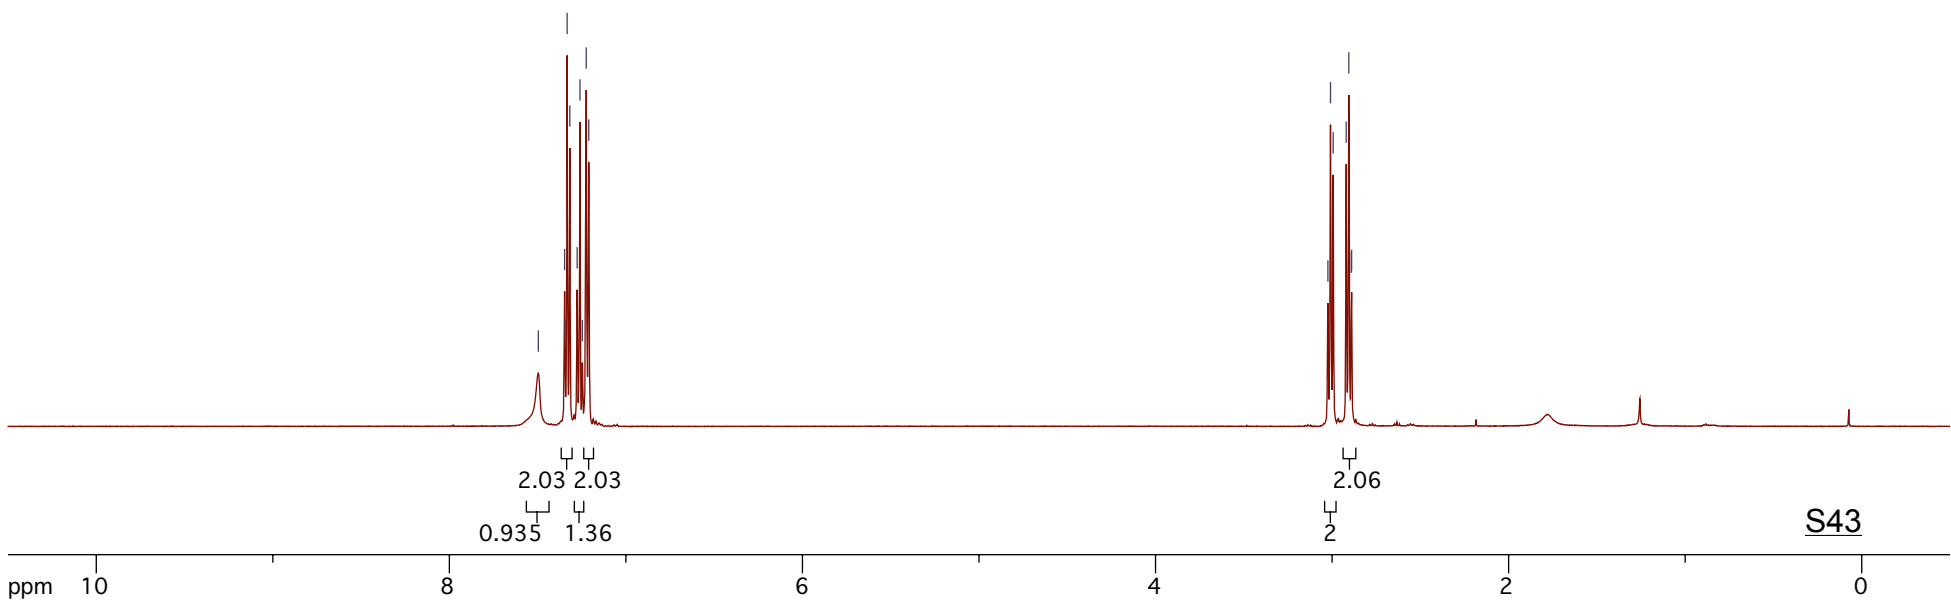

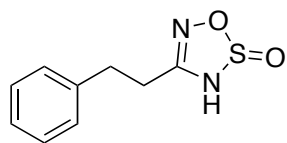

compound 21

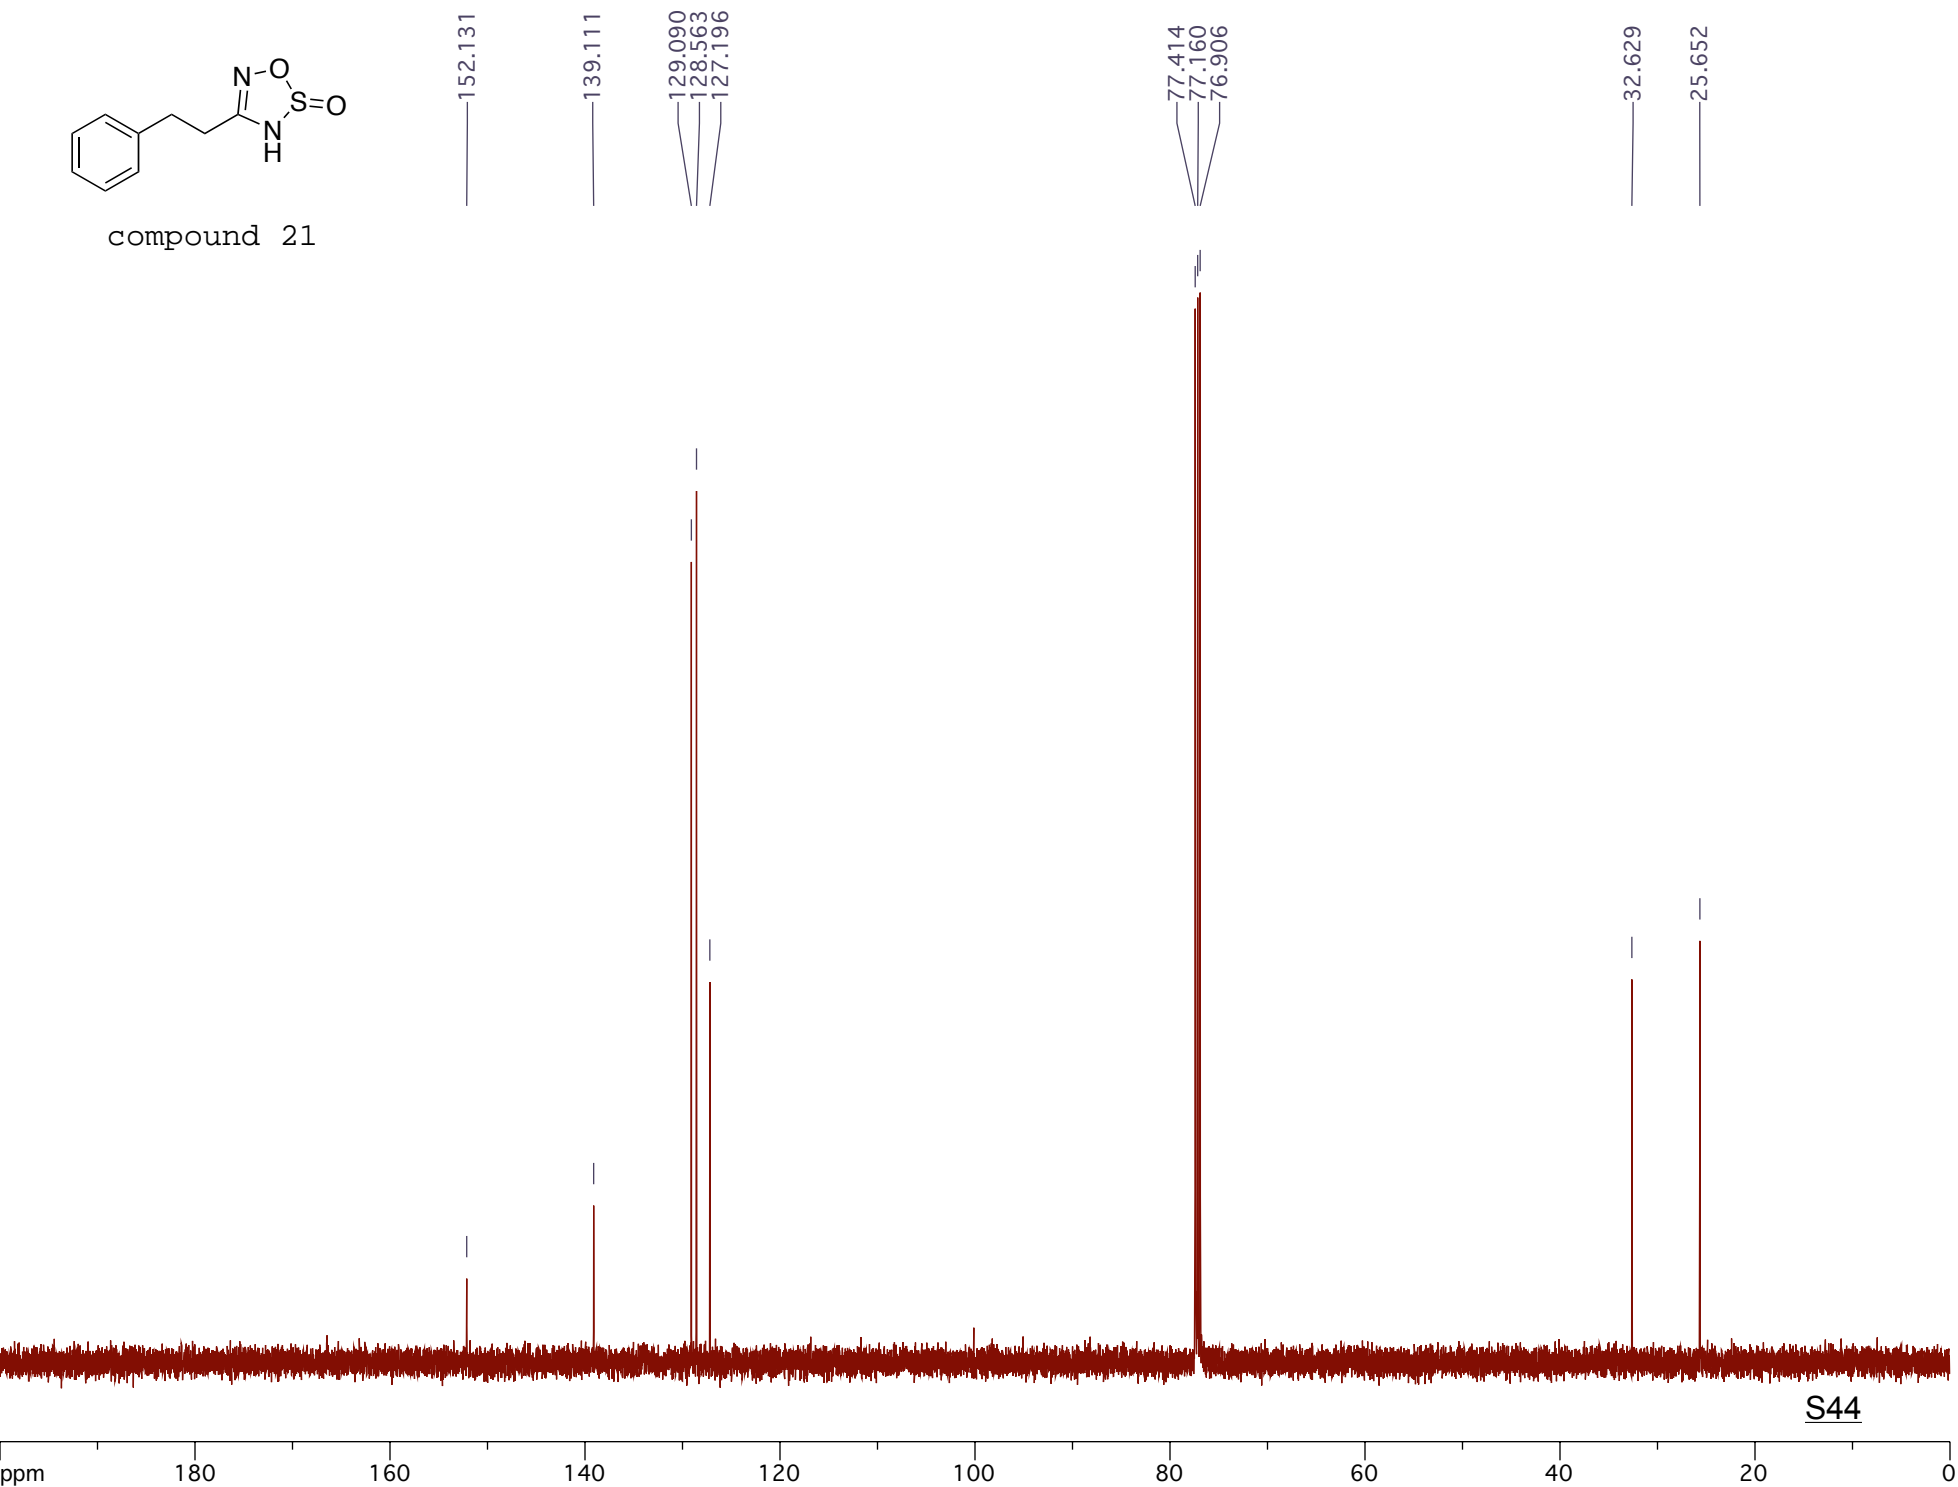

CL-016  
fr 76. sample from the Xray. check before mp

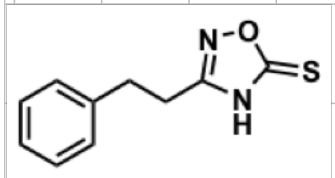

compound 22

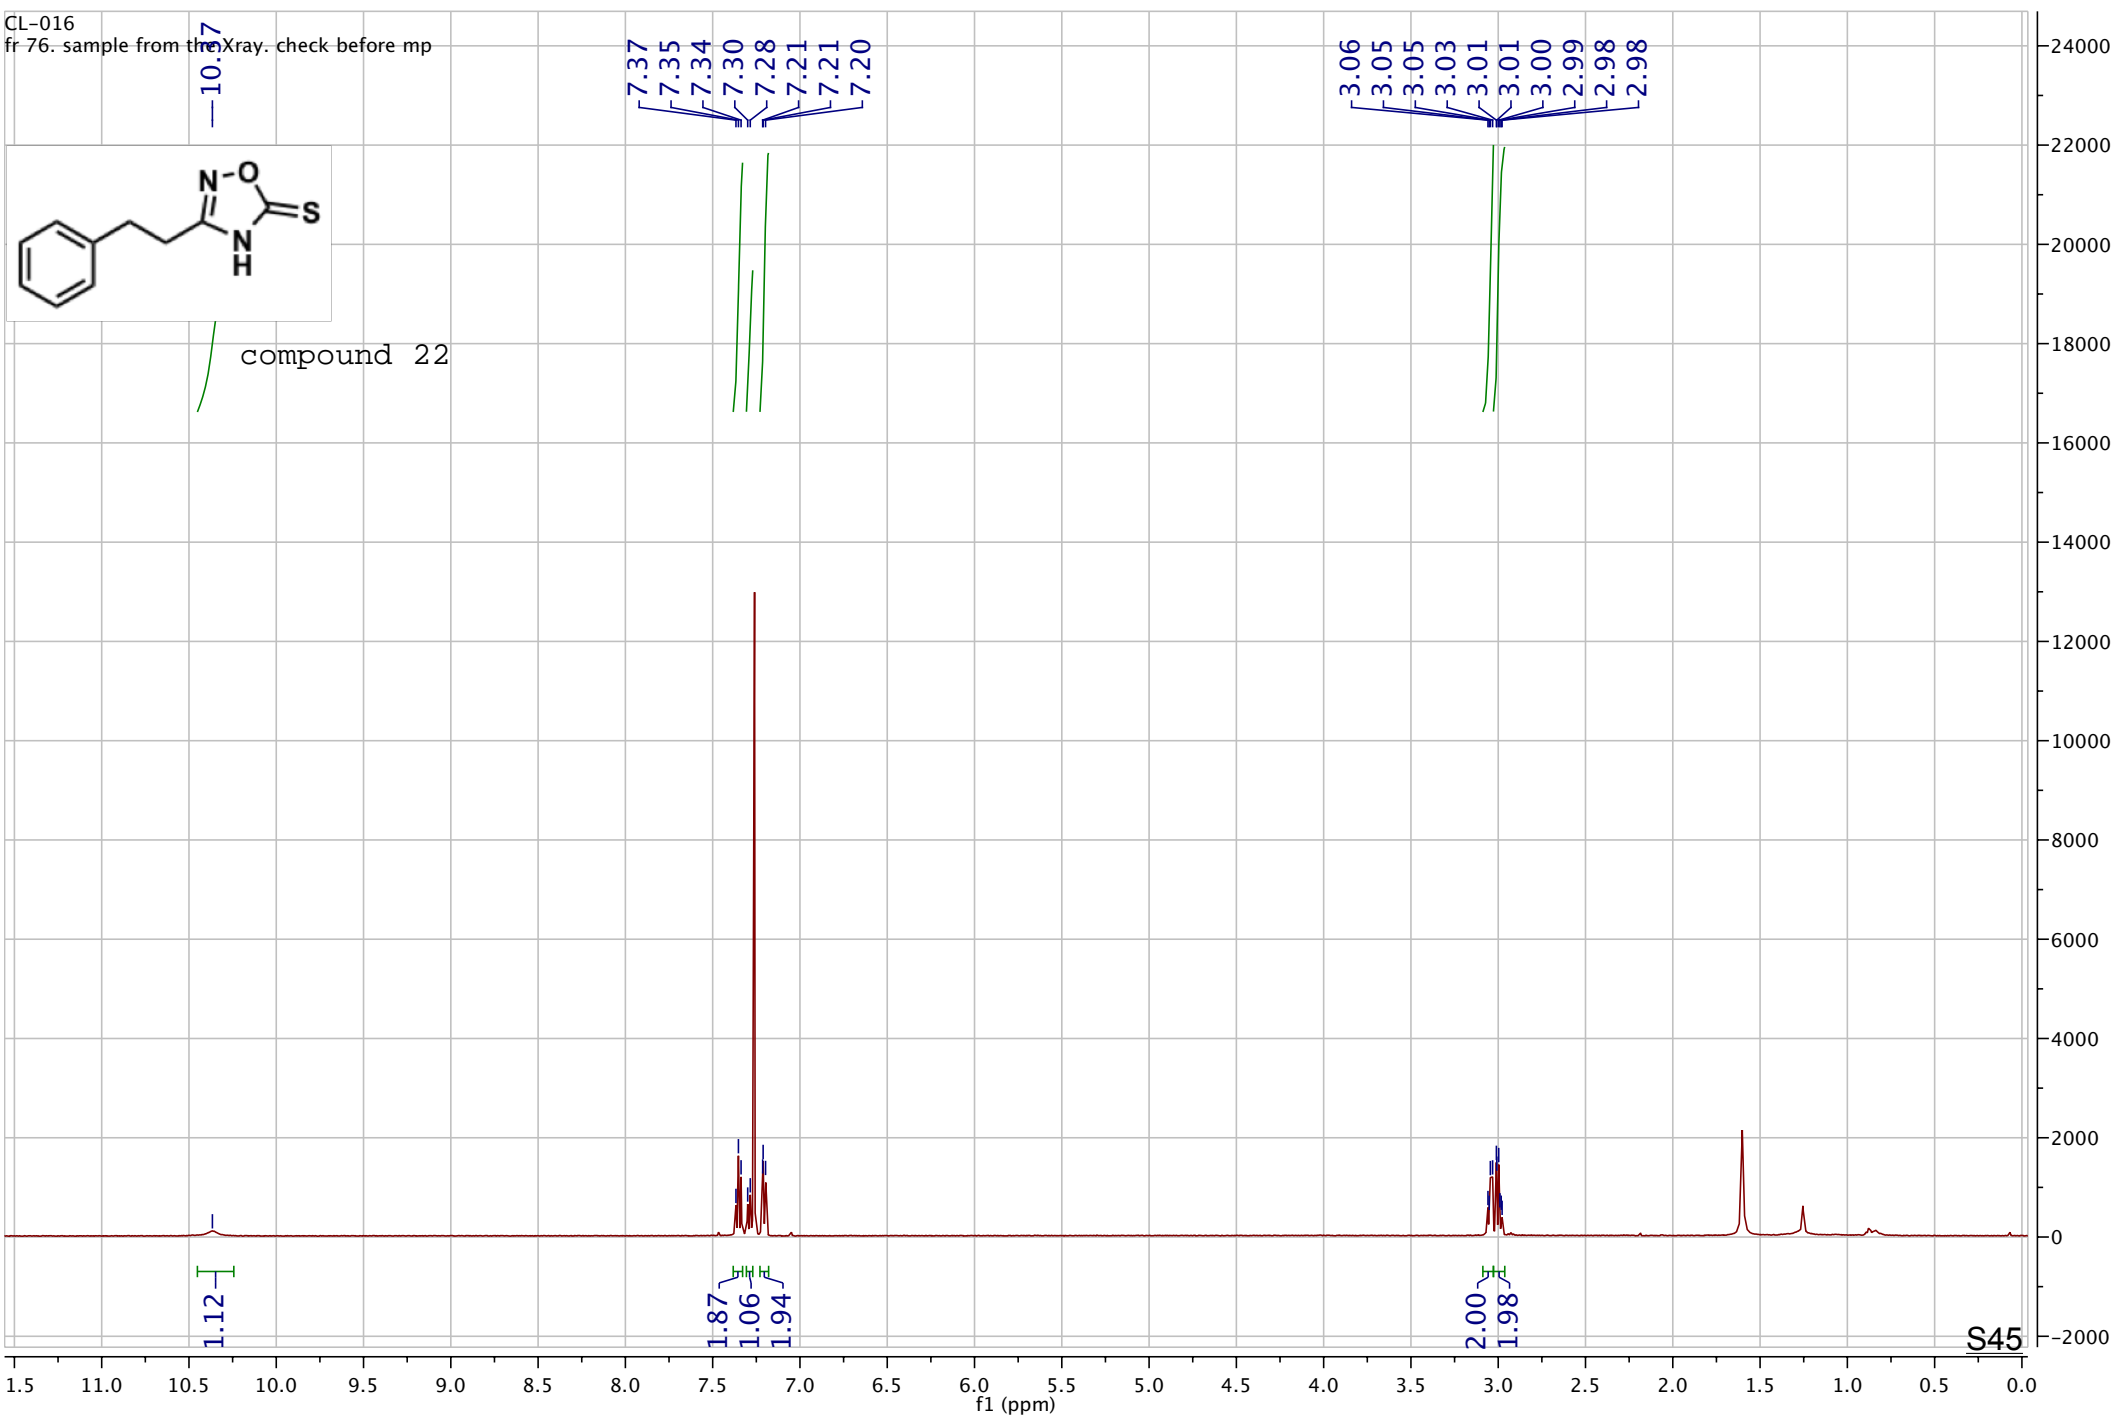

CL-016  
fr 76, sample from the Xray  
for 2D

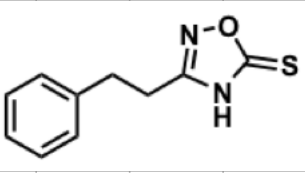

compound 22

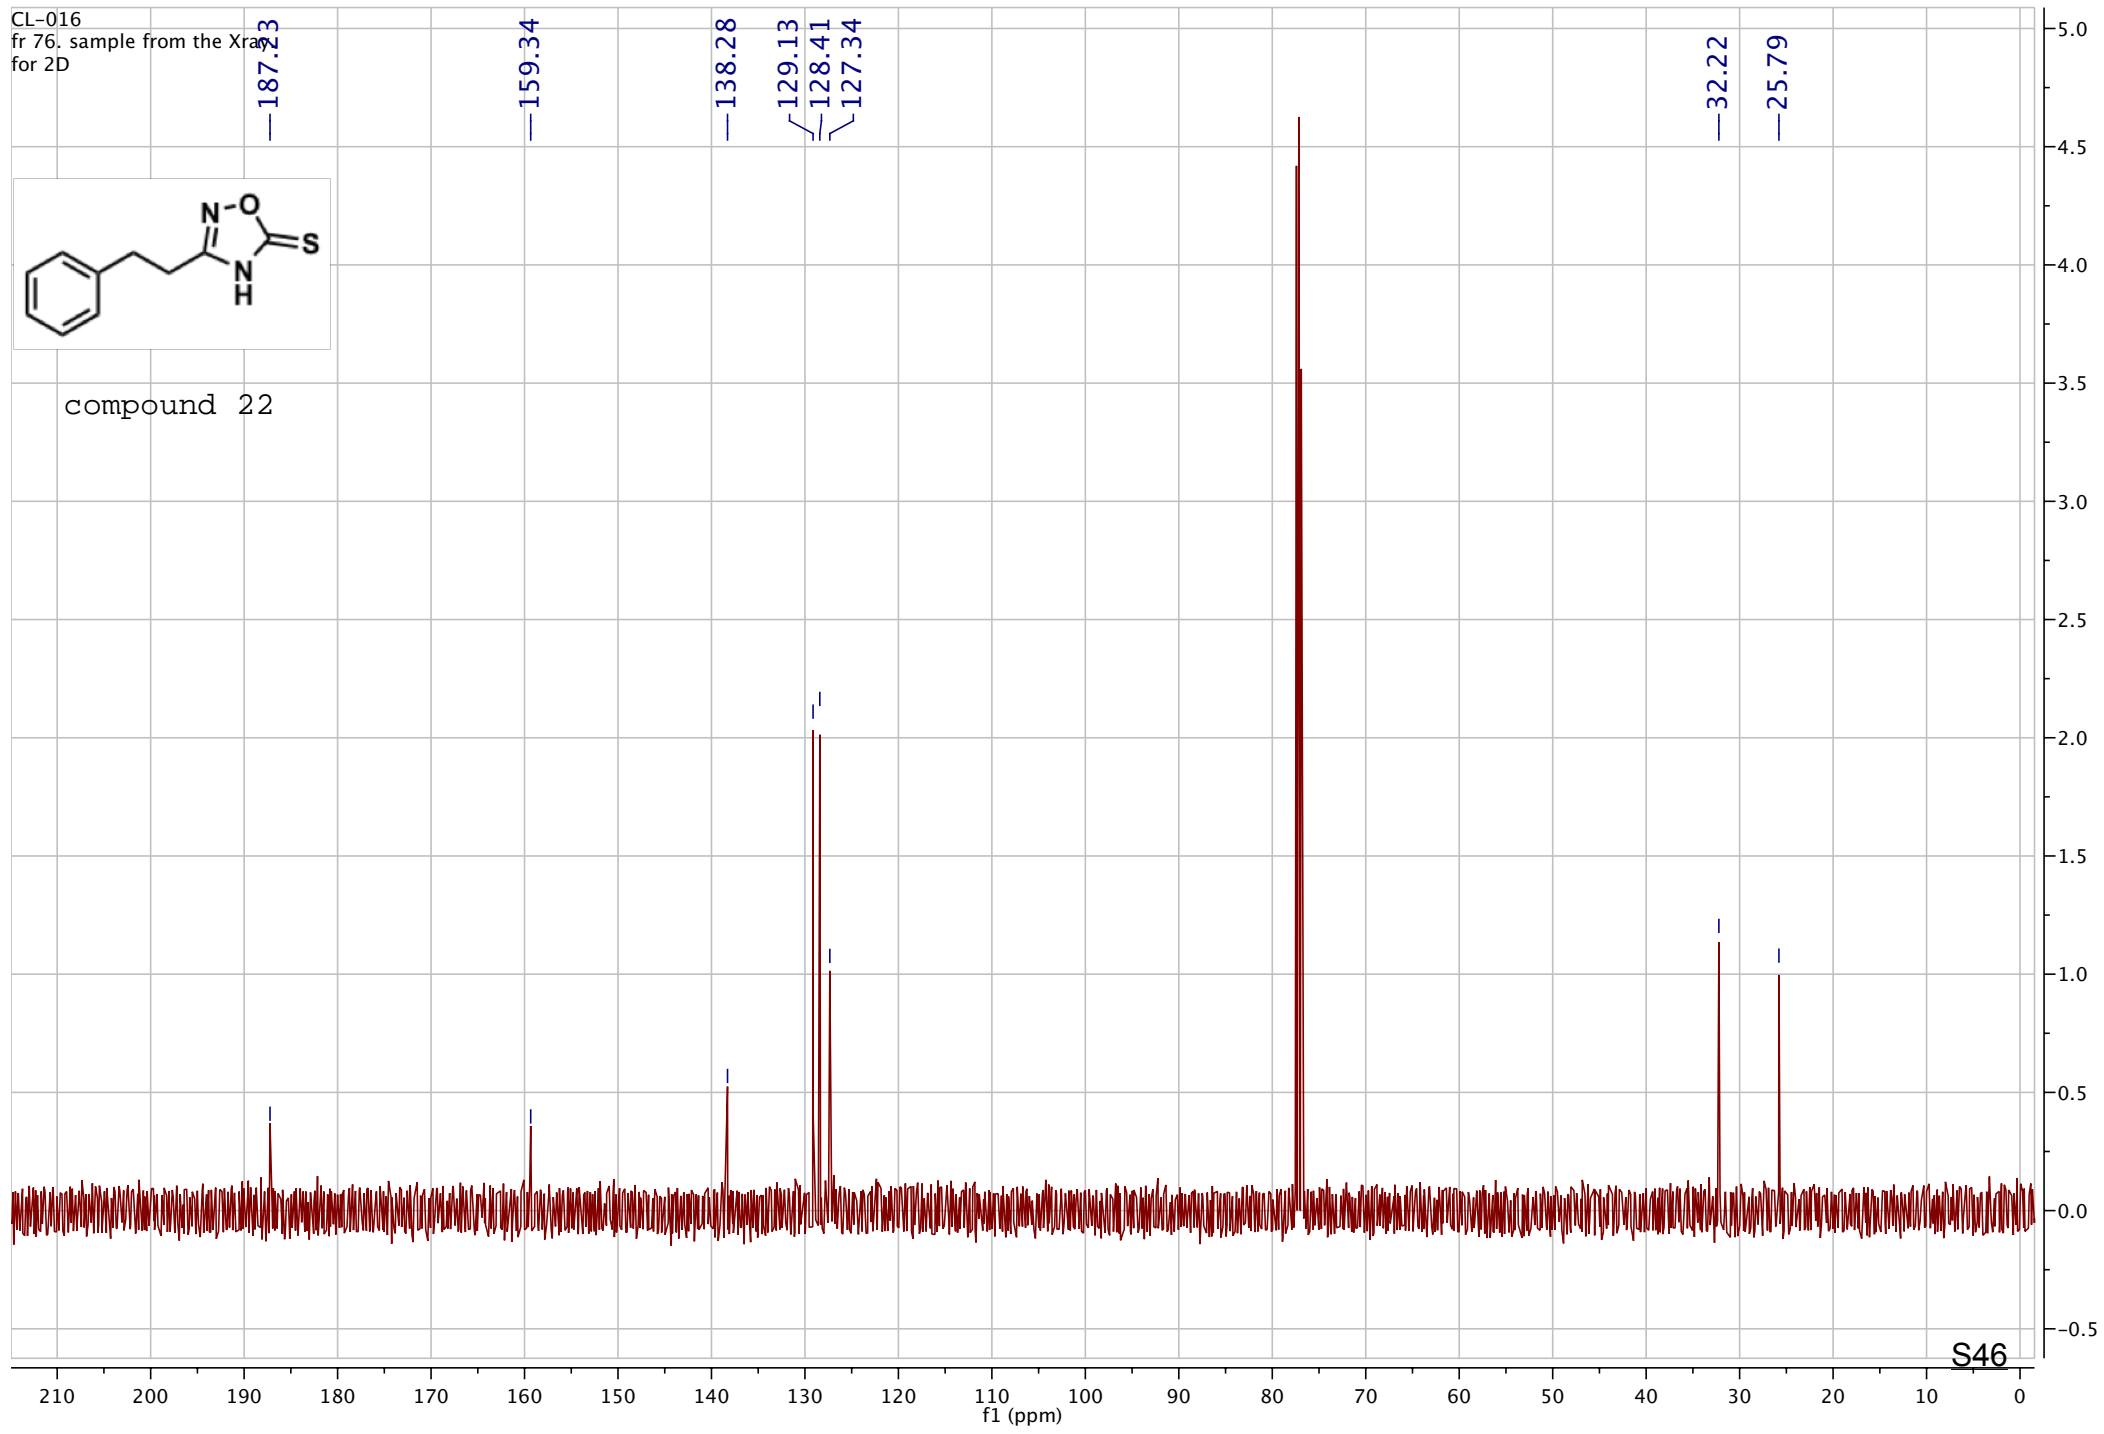

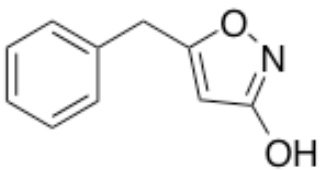

compound 23

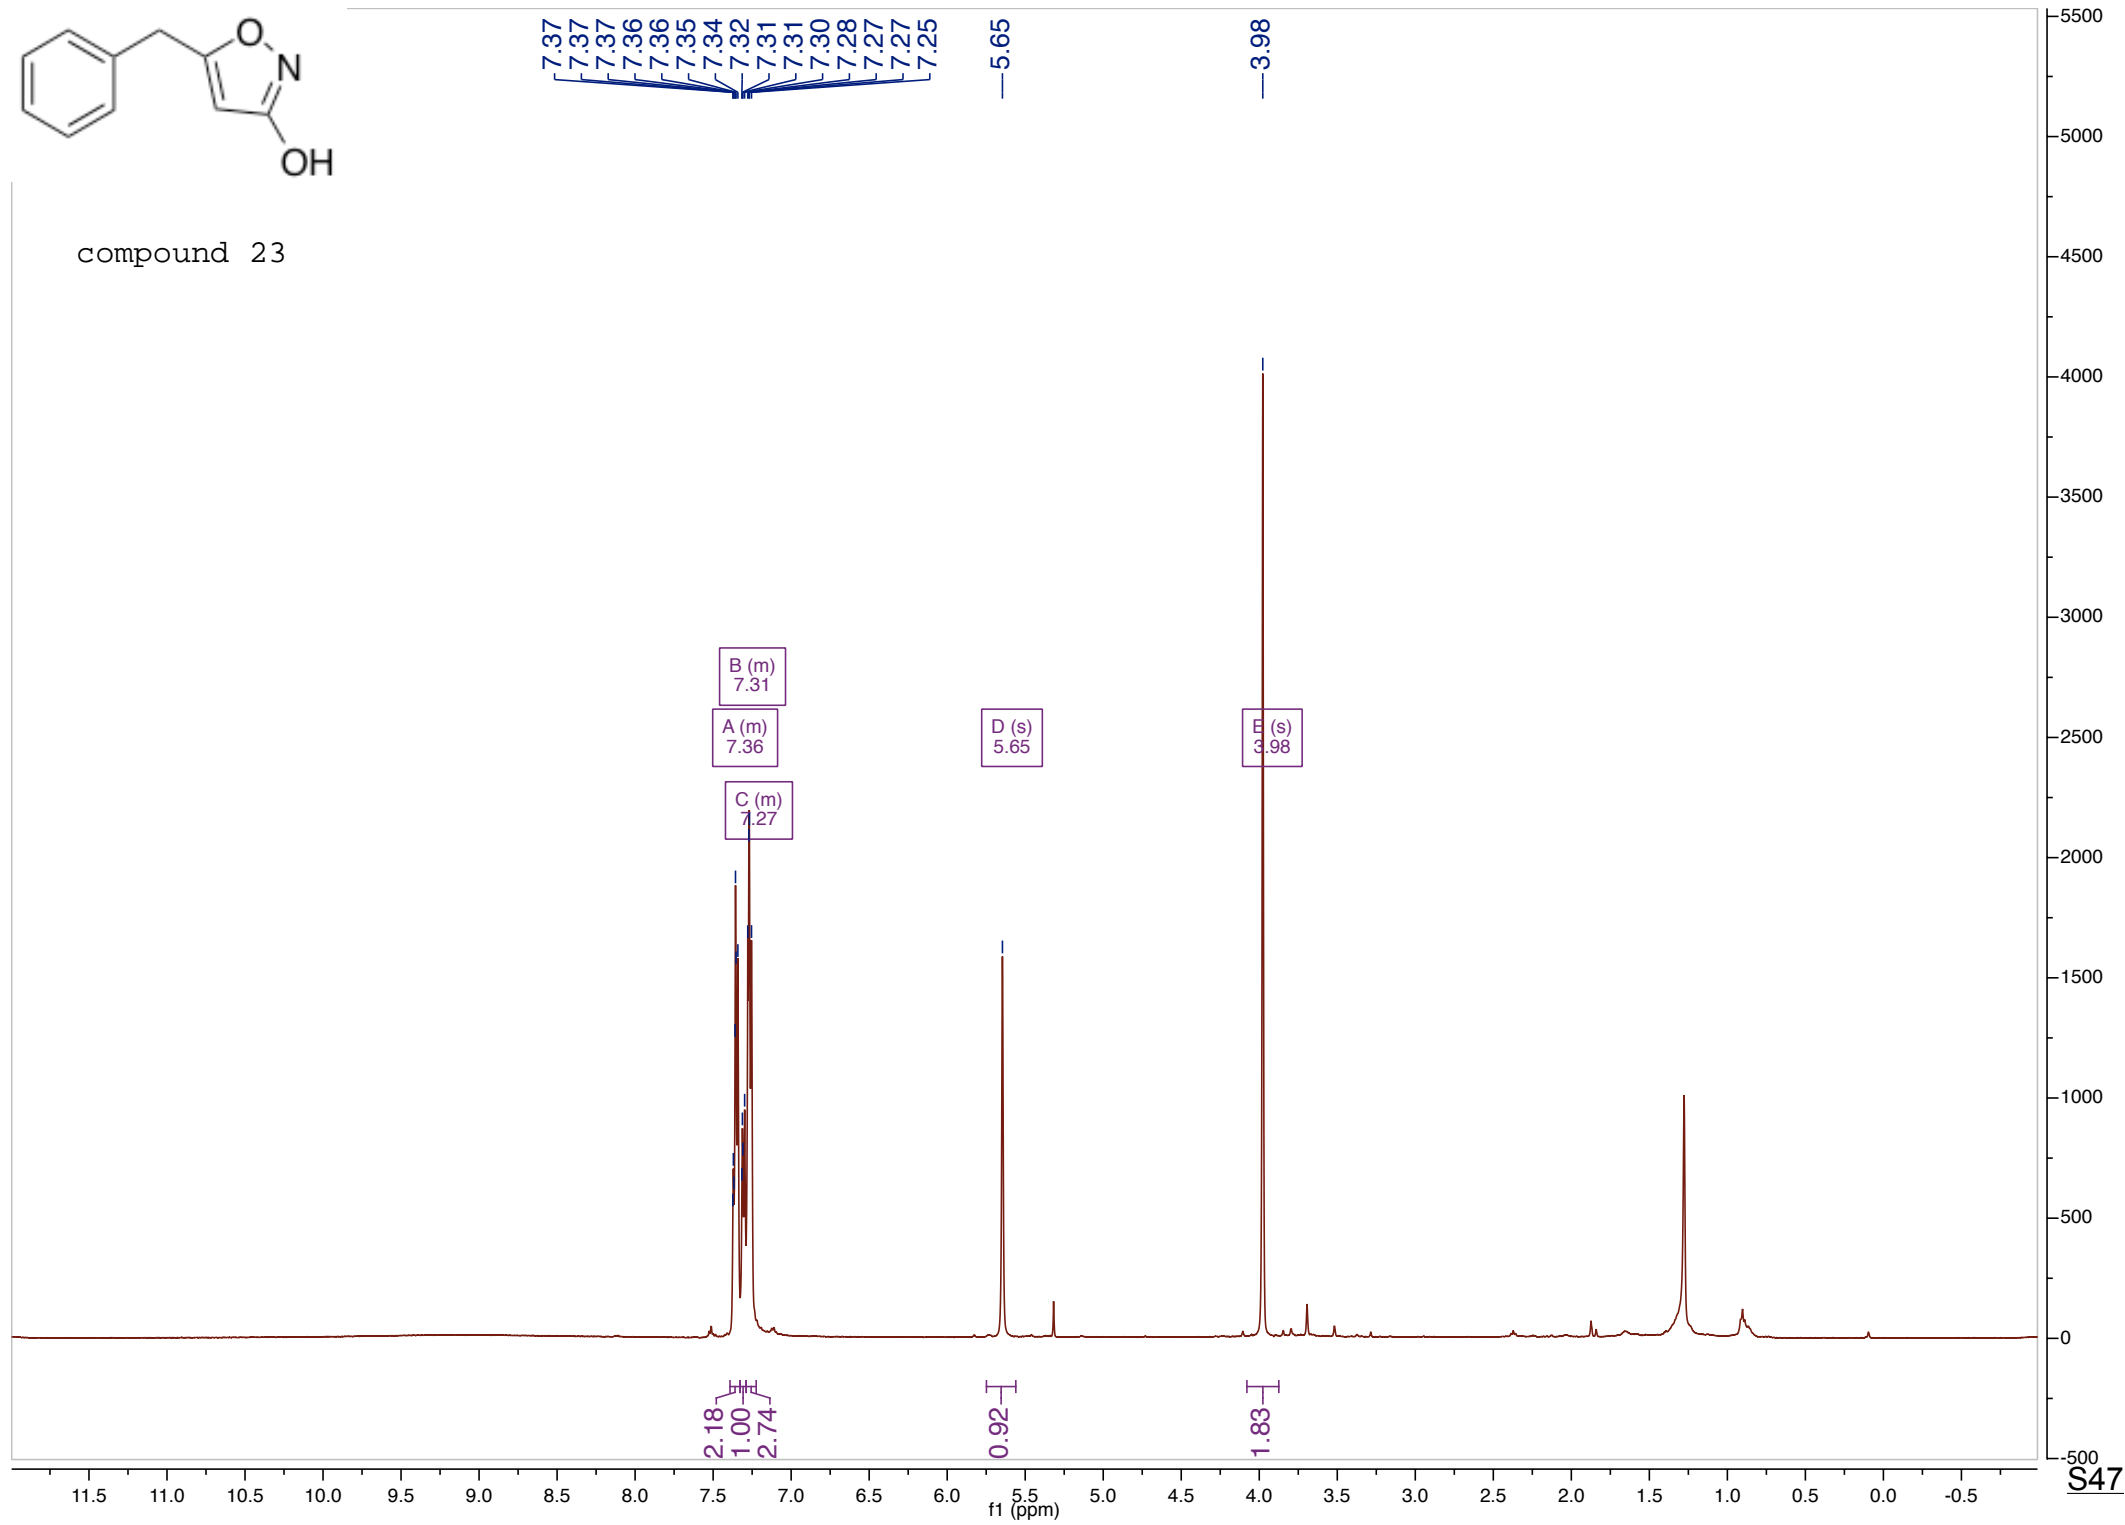

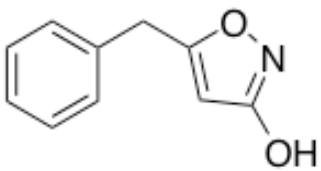

compound 23

173.02  
171.30

135.40  
128.99  
128.92  
127.42

94.40

33.87  
29.86 grease

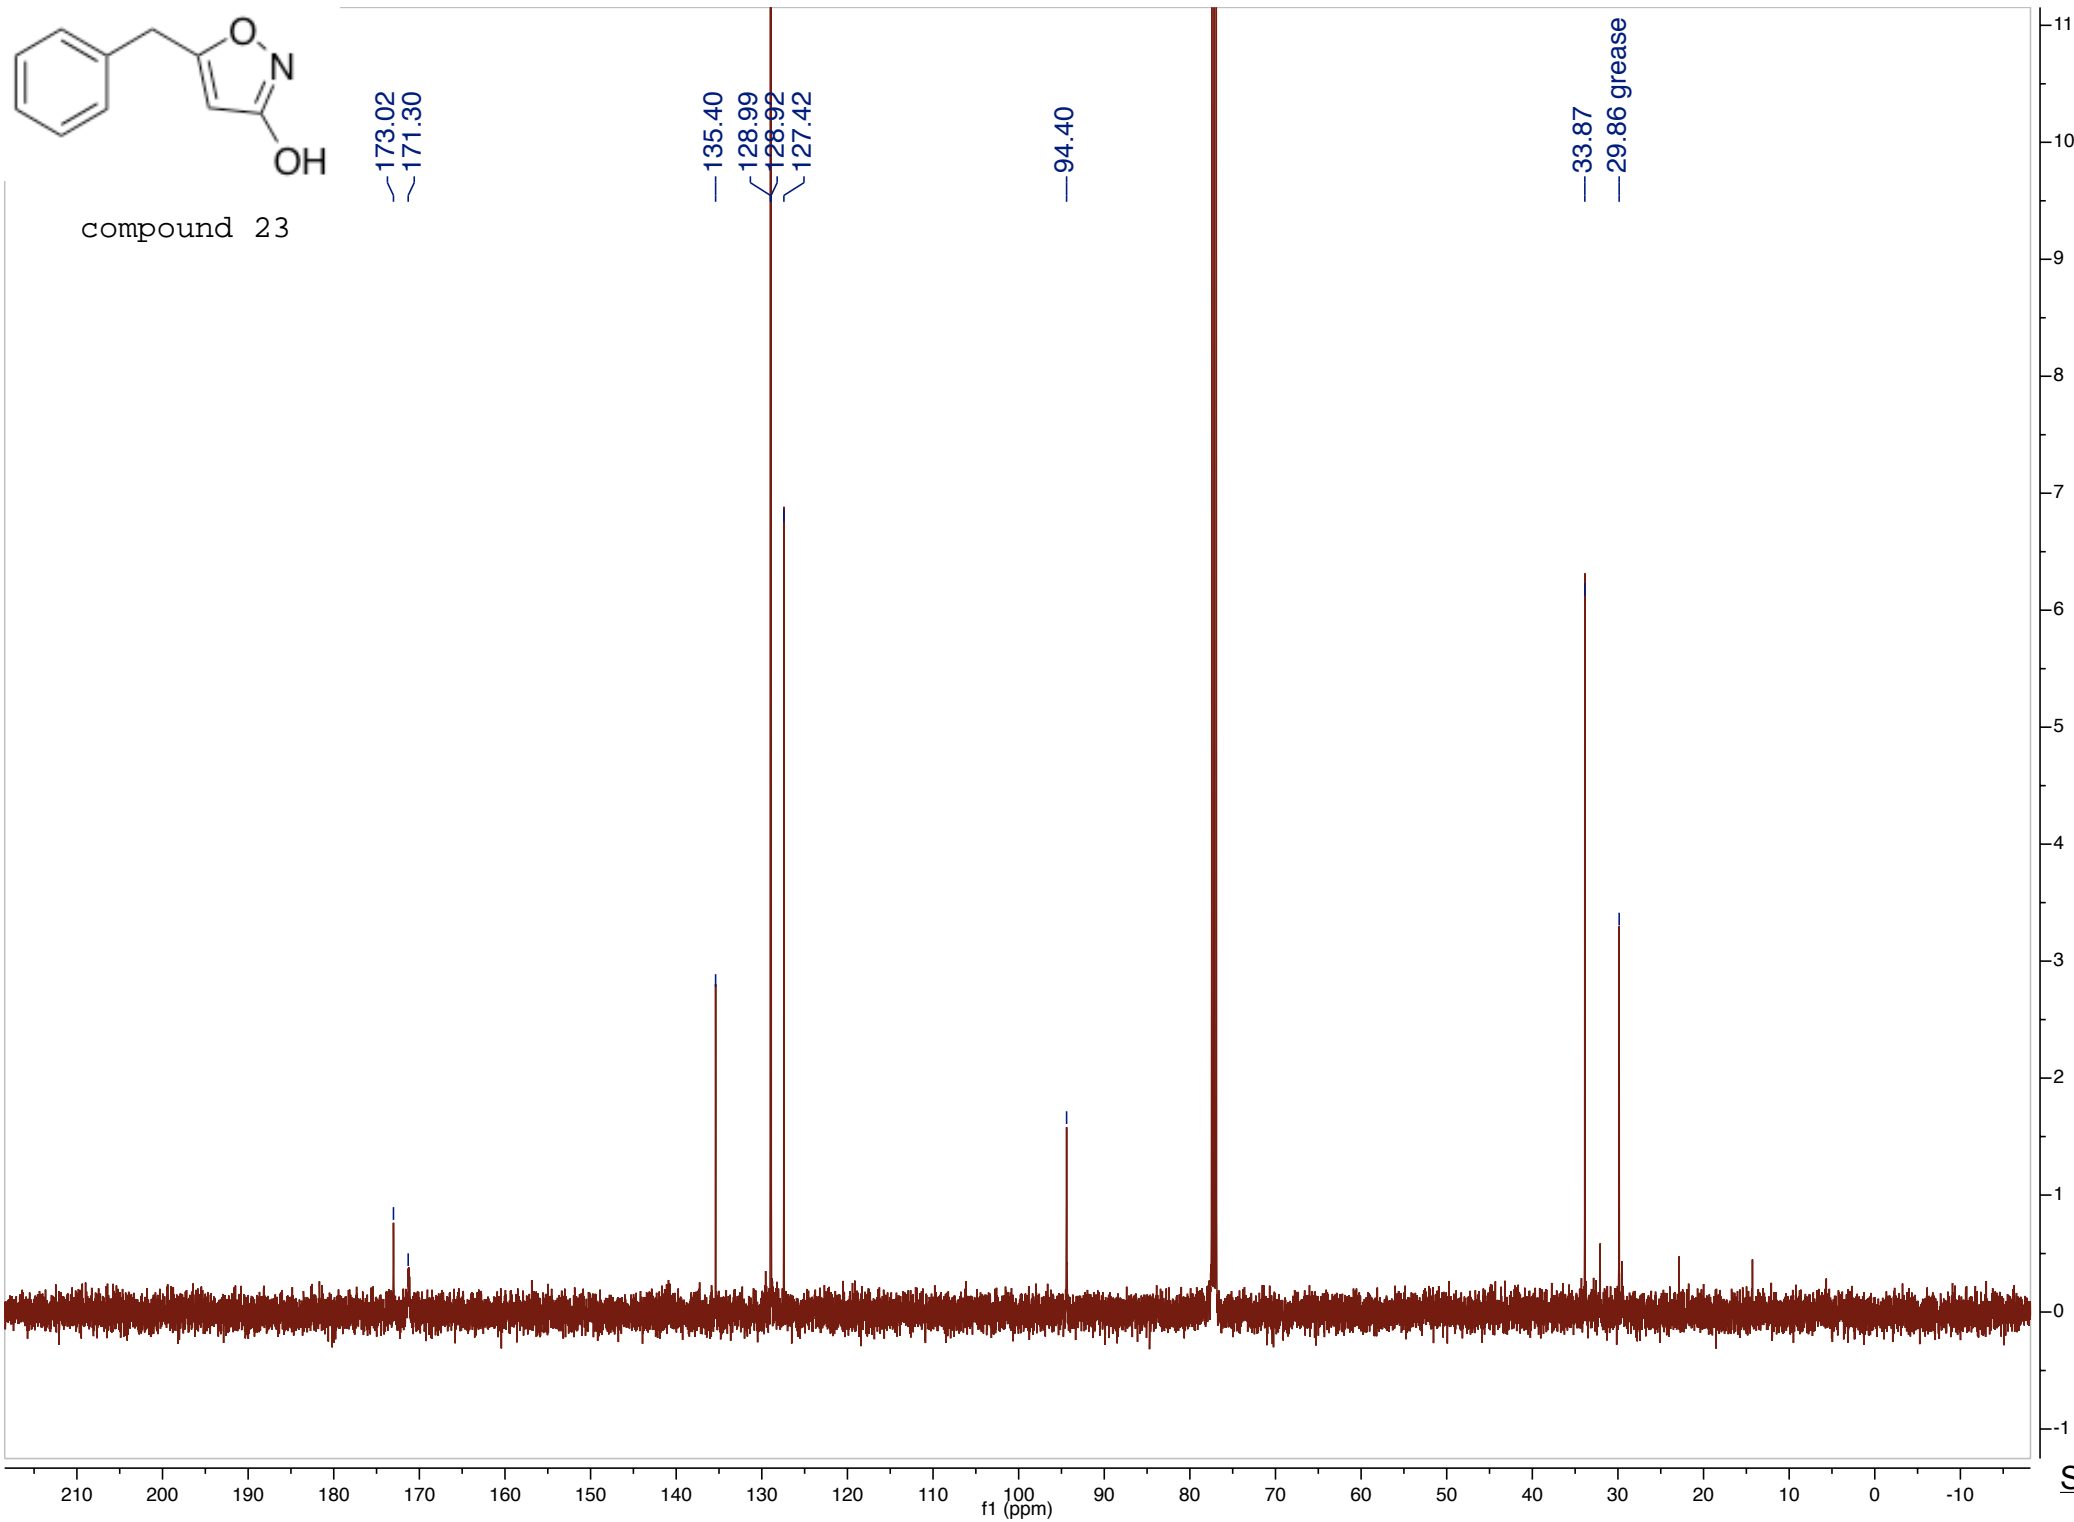



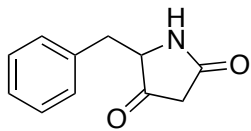

compound 24

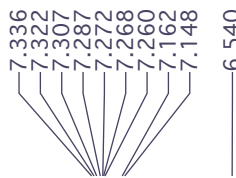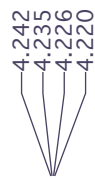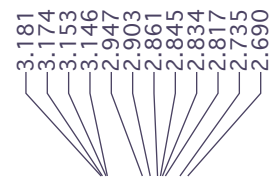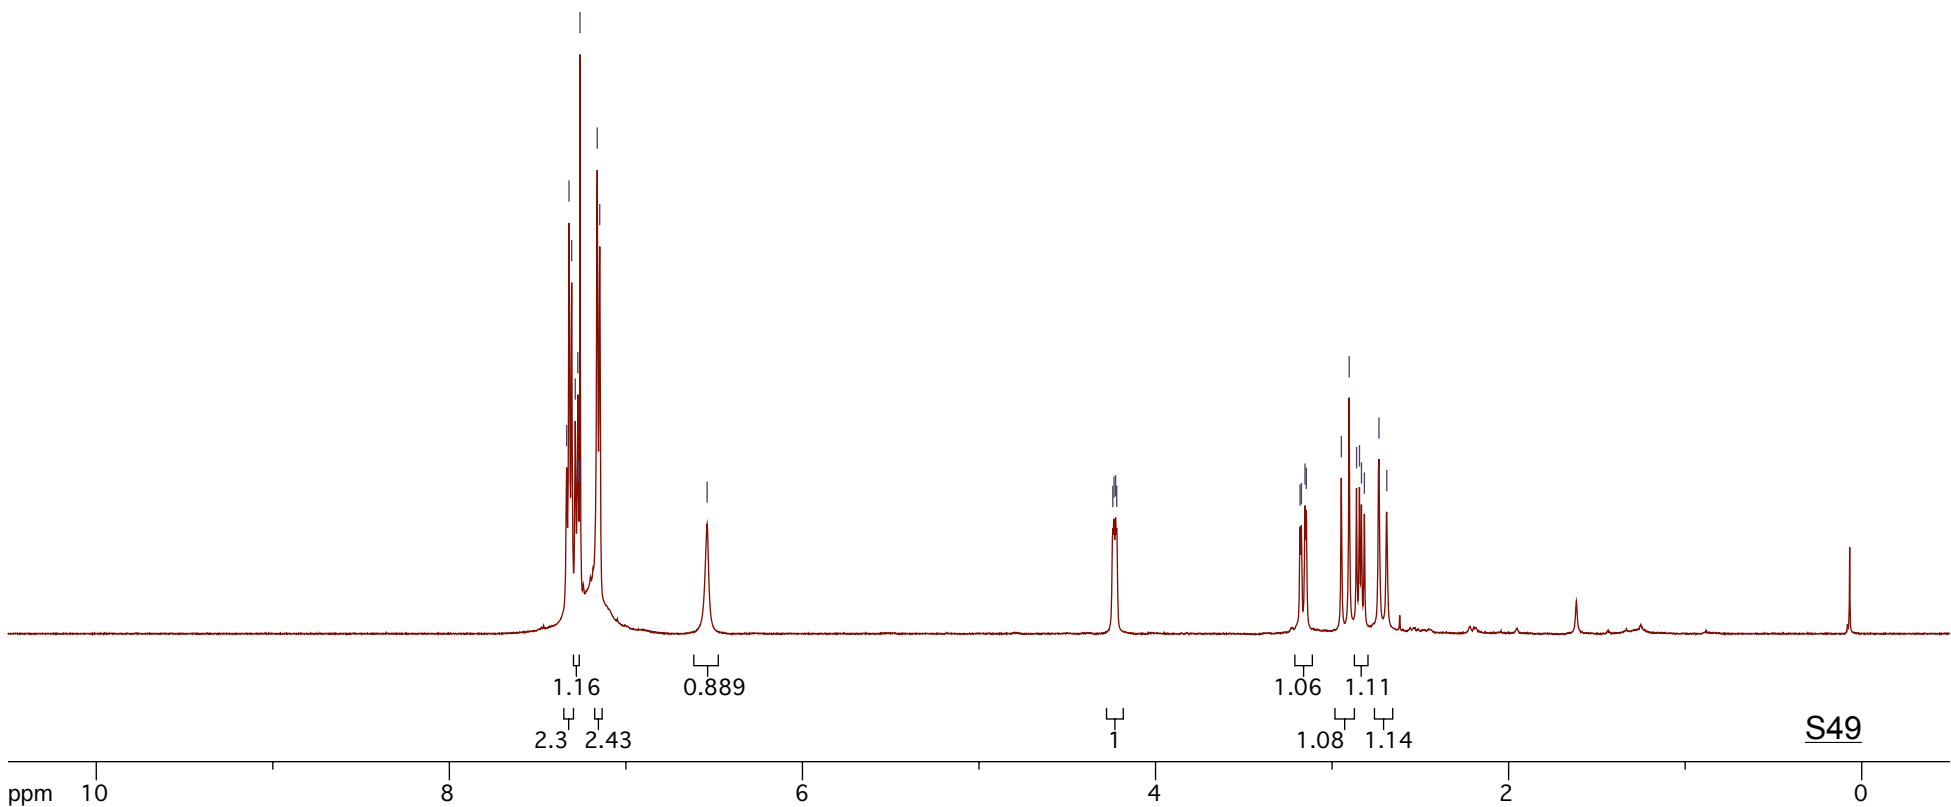

206.510

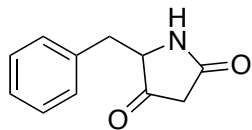

170.794

135.299

129.461

129.162

127.609

77.414

77.160

76.906

65.342

40.914

38.437

compound 24

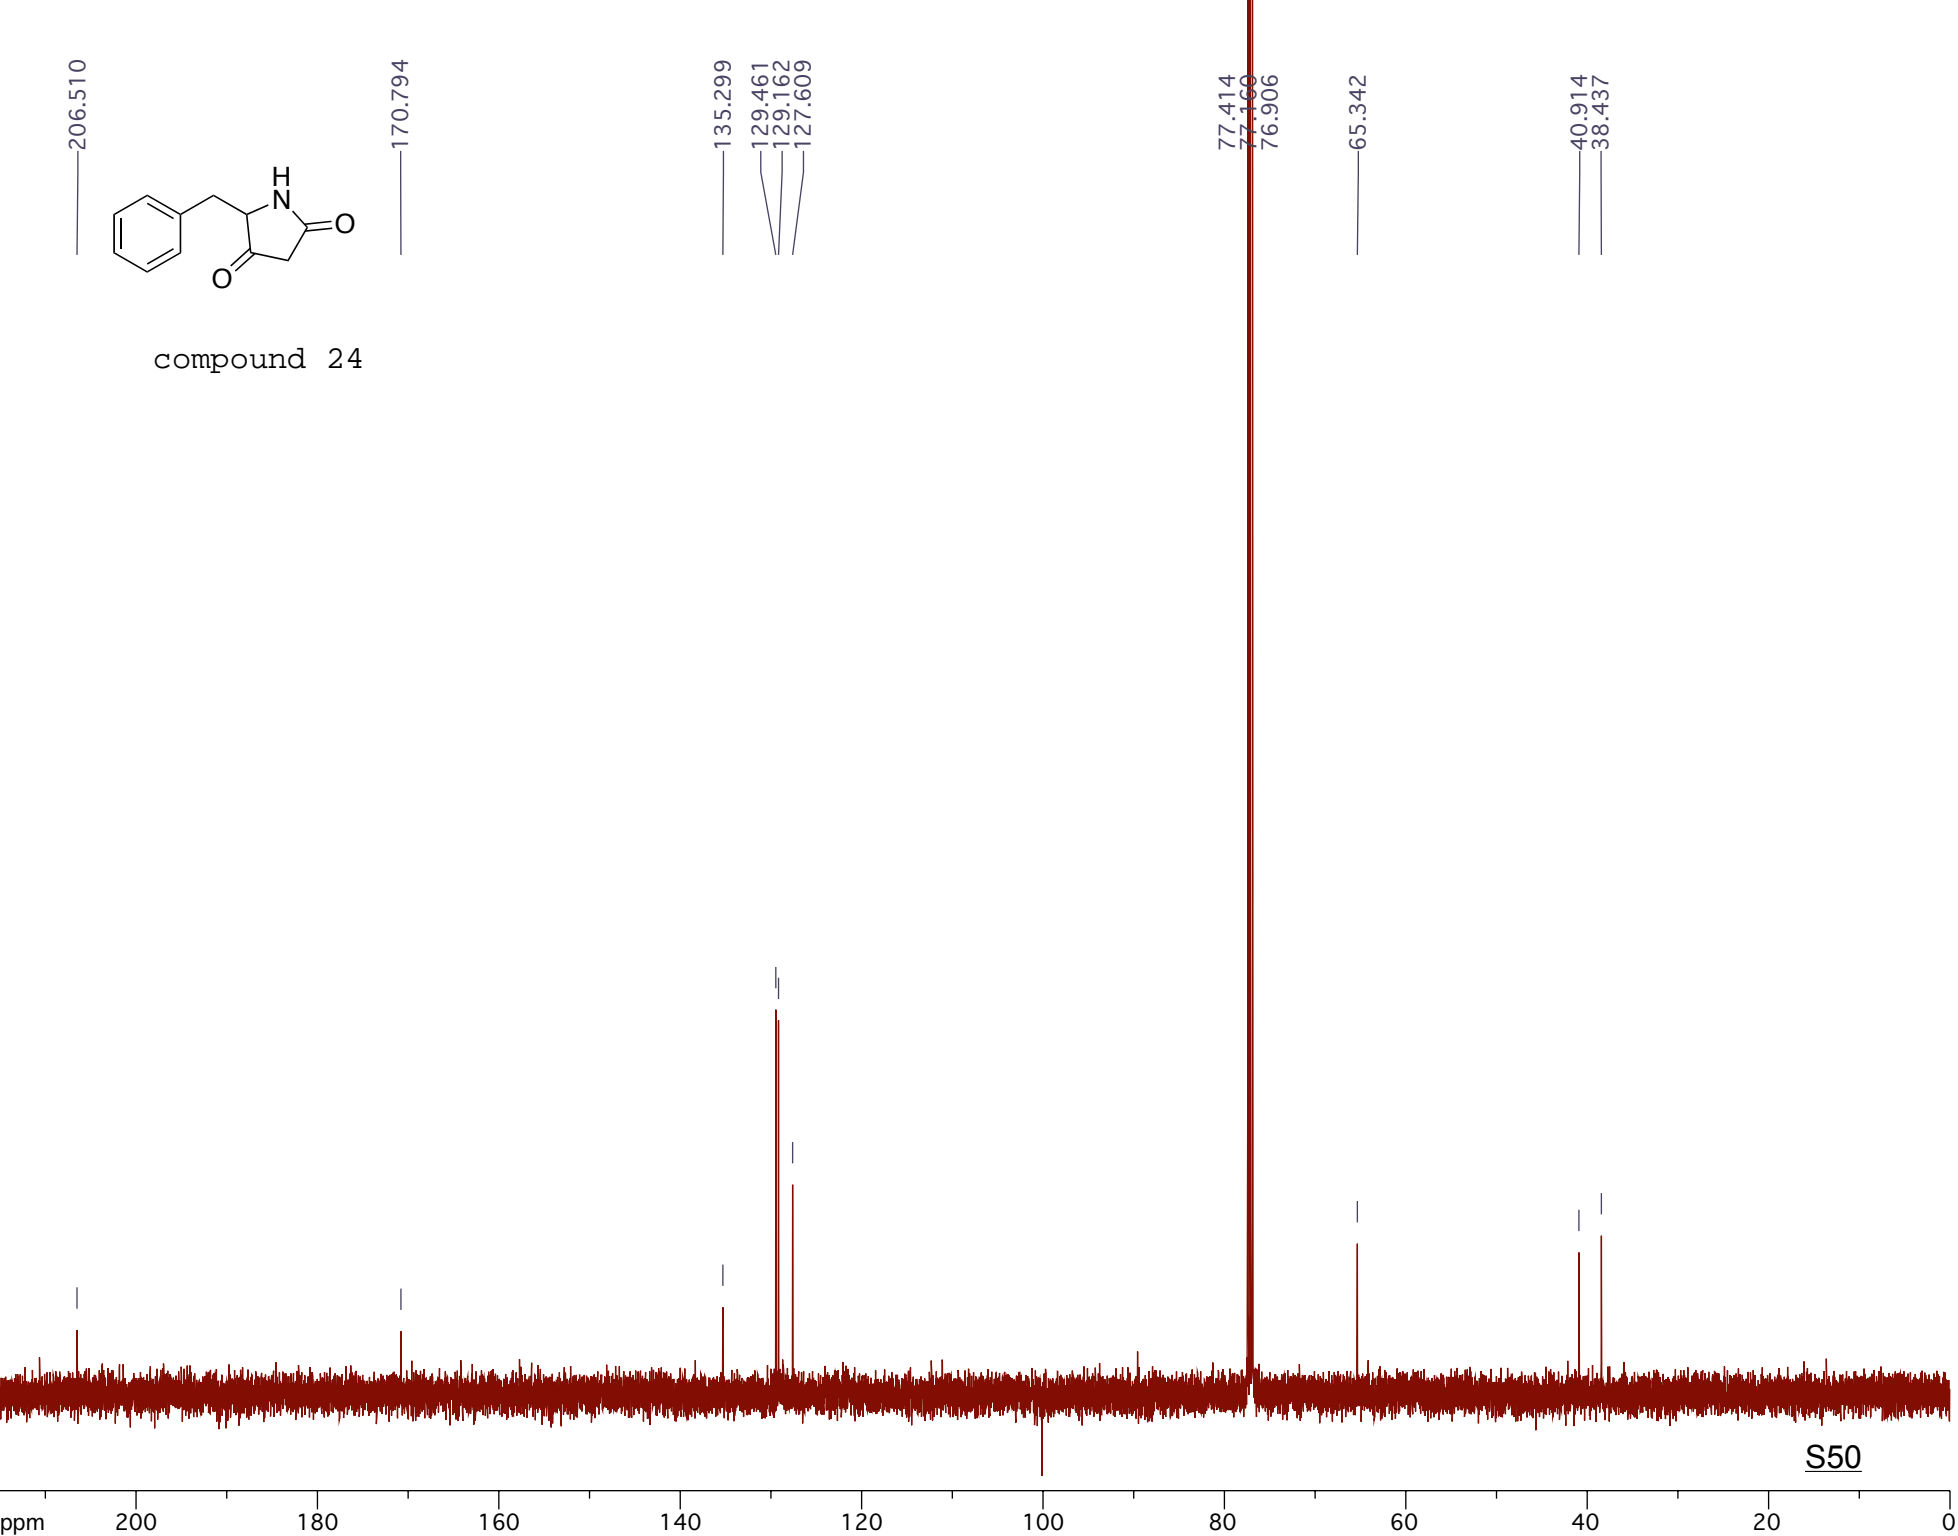

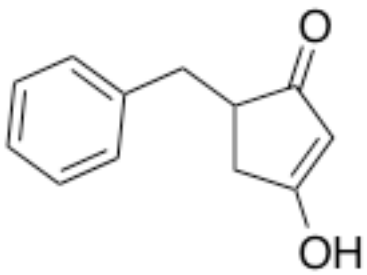

compound 25

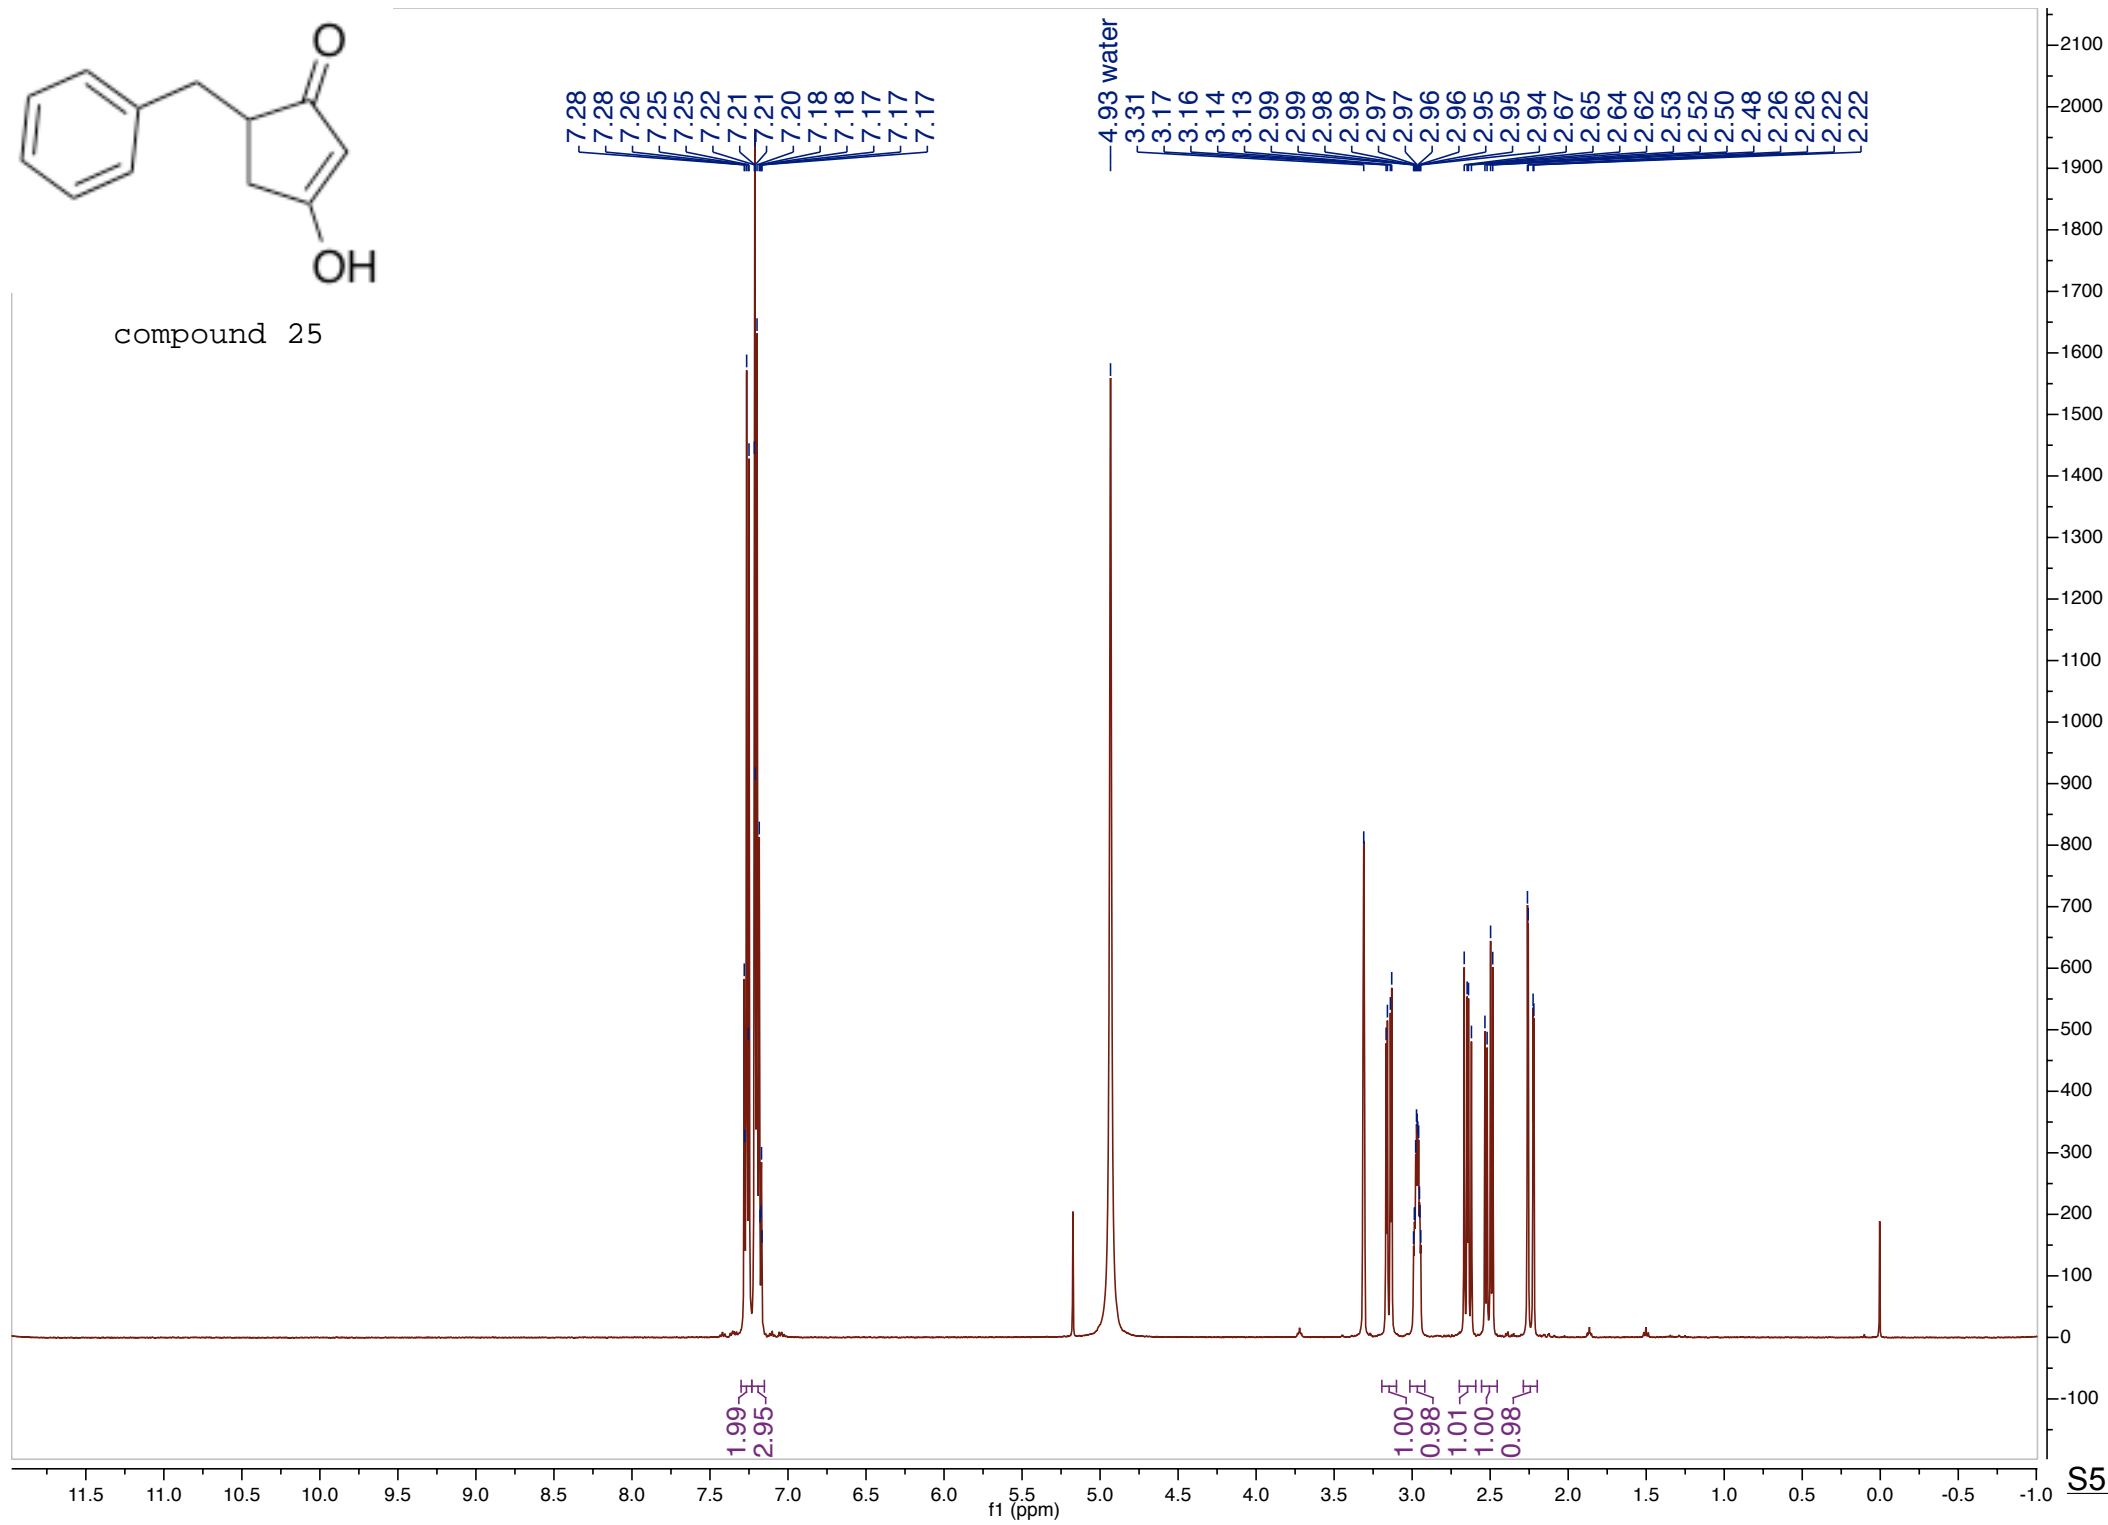

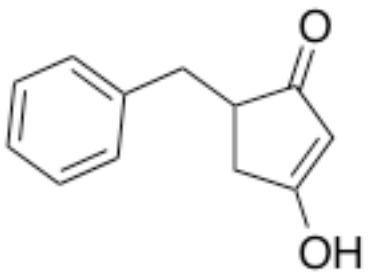

compound 25

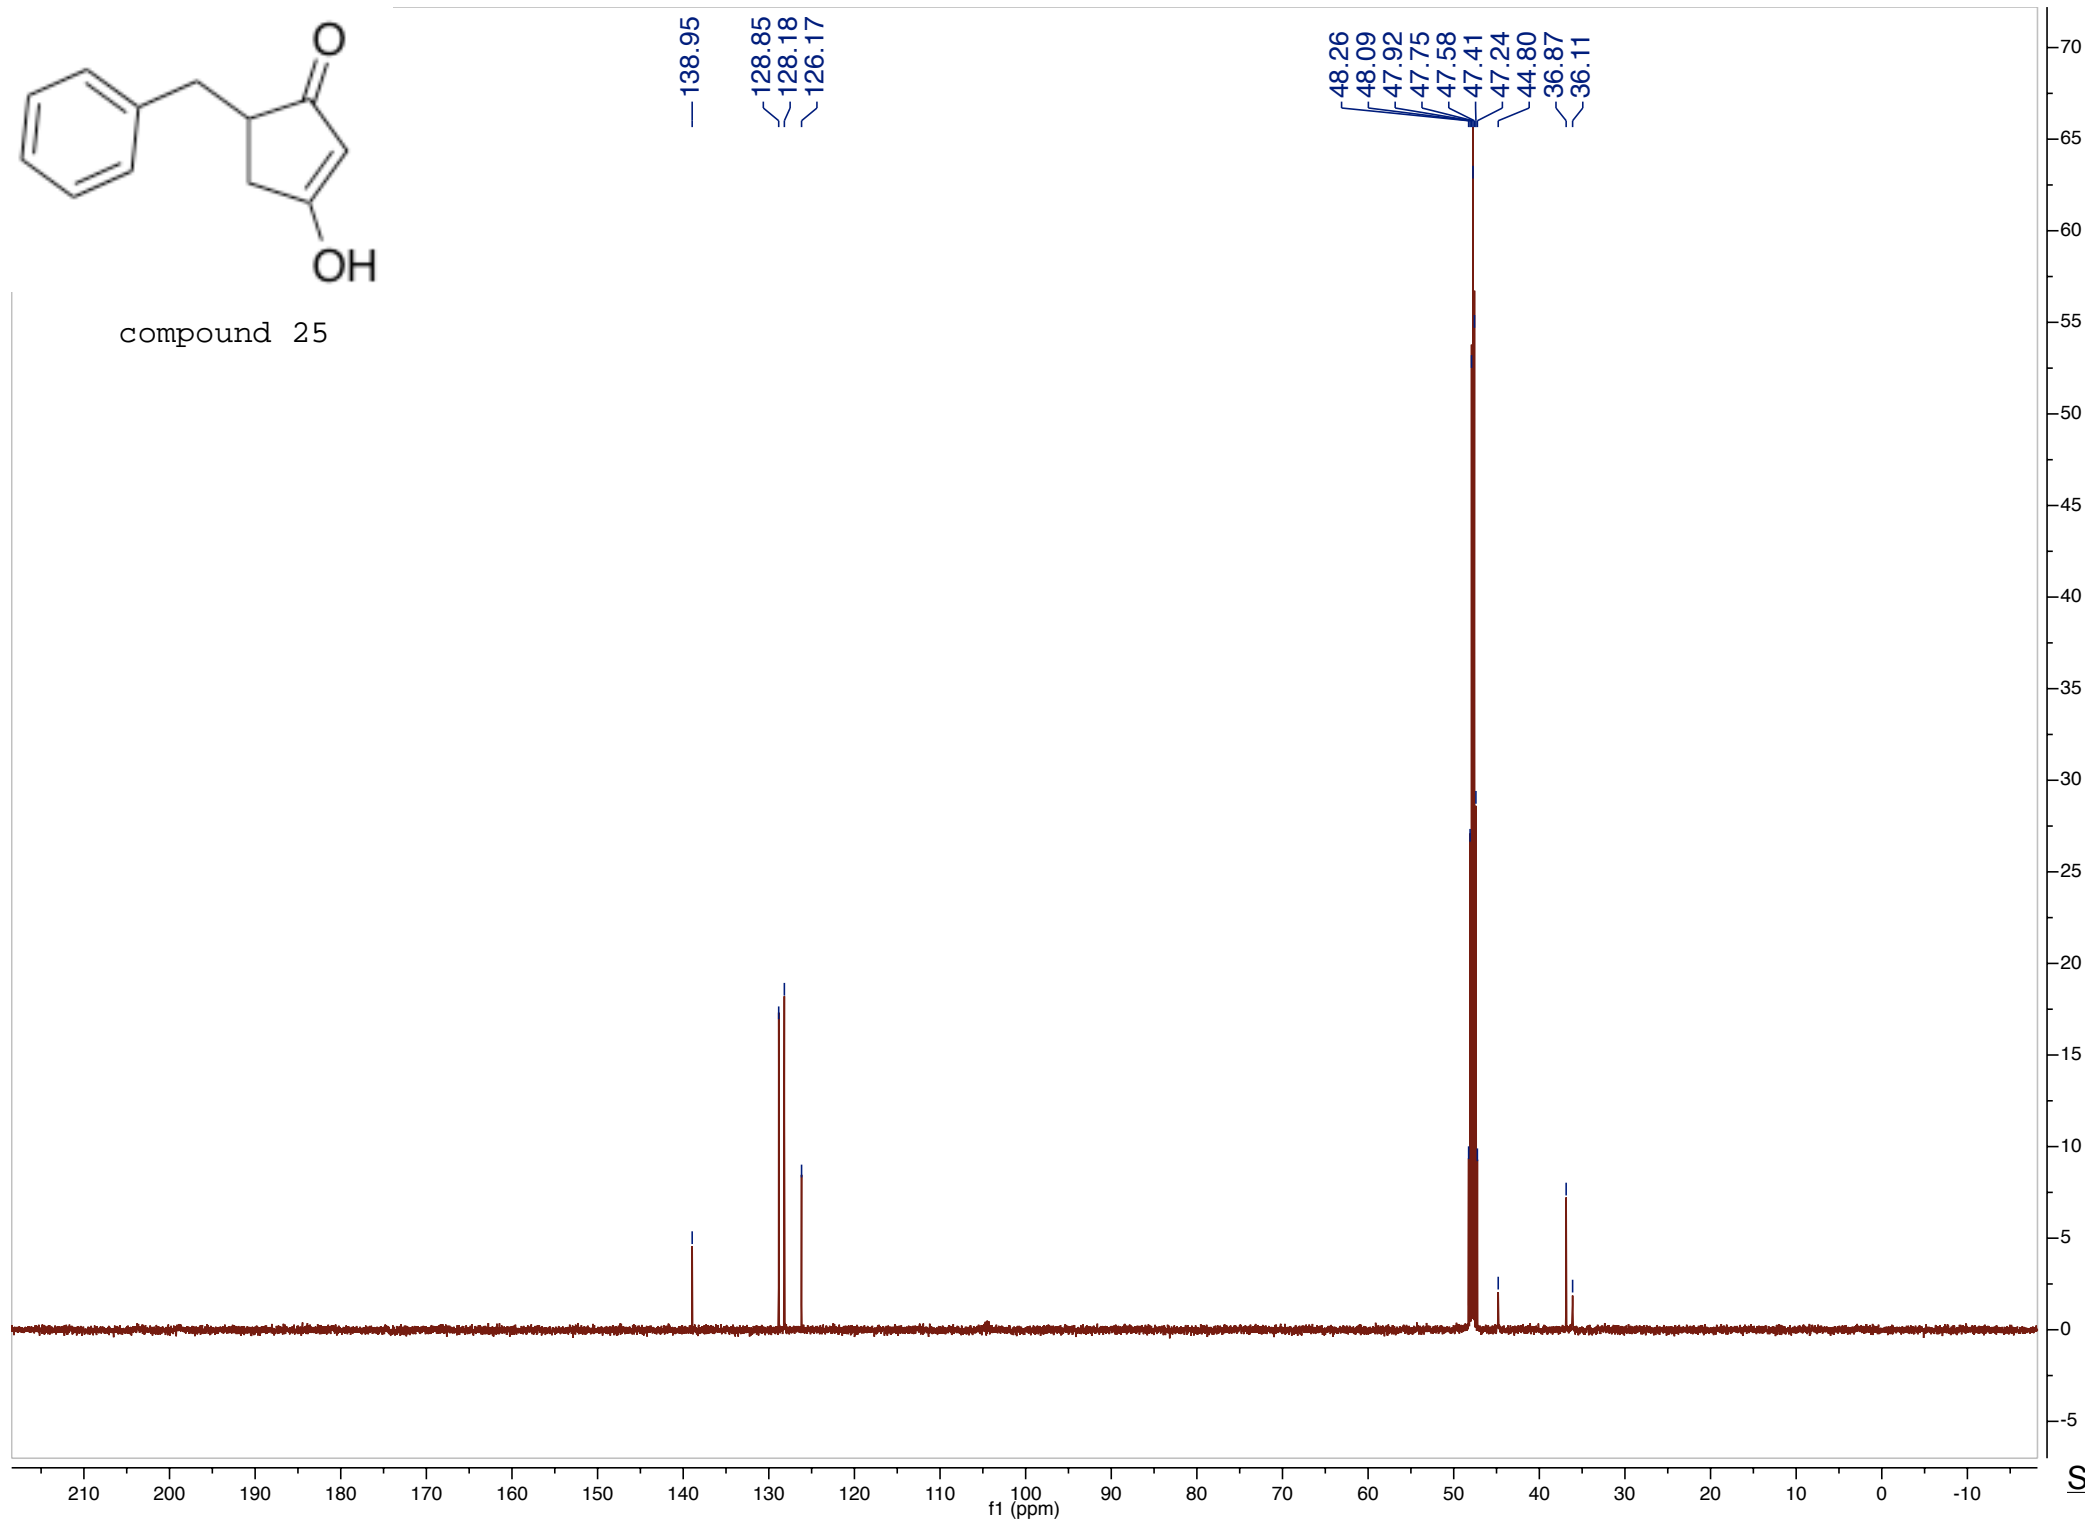

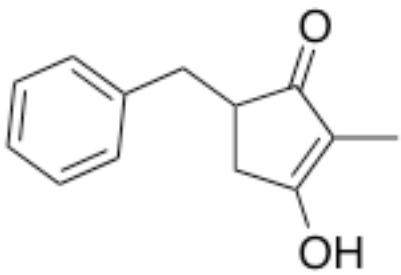

compound 26

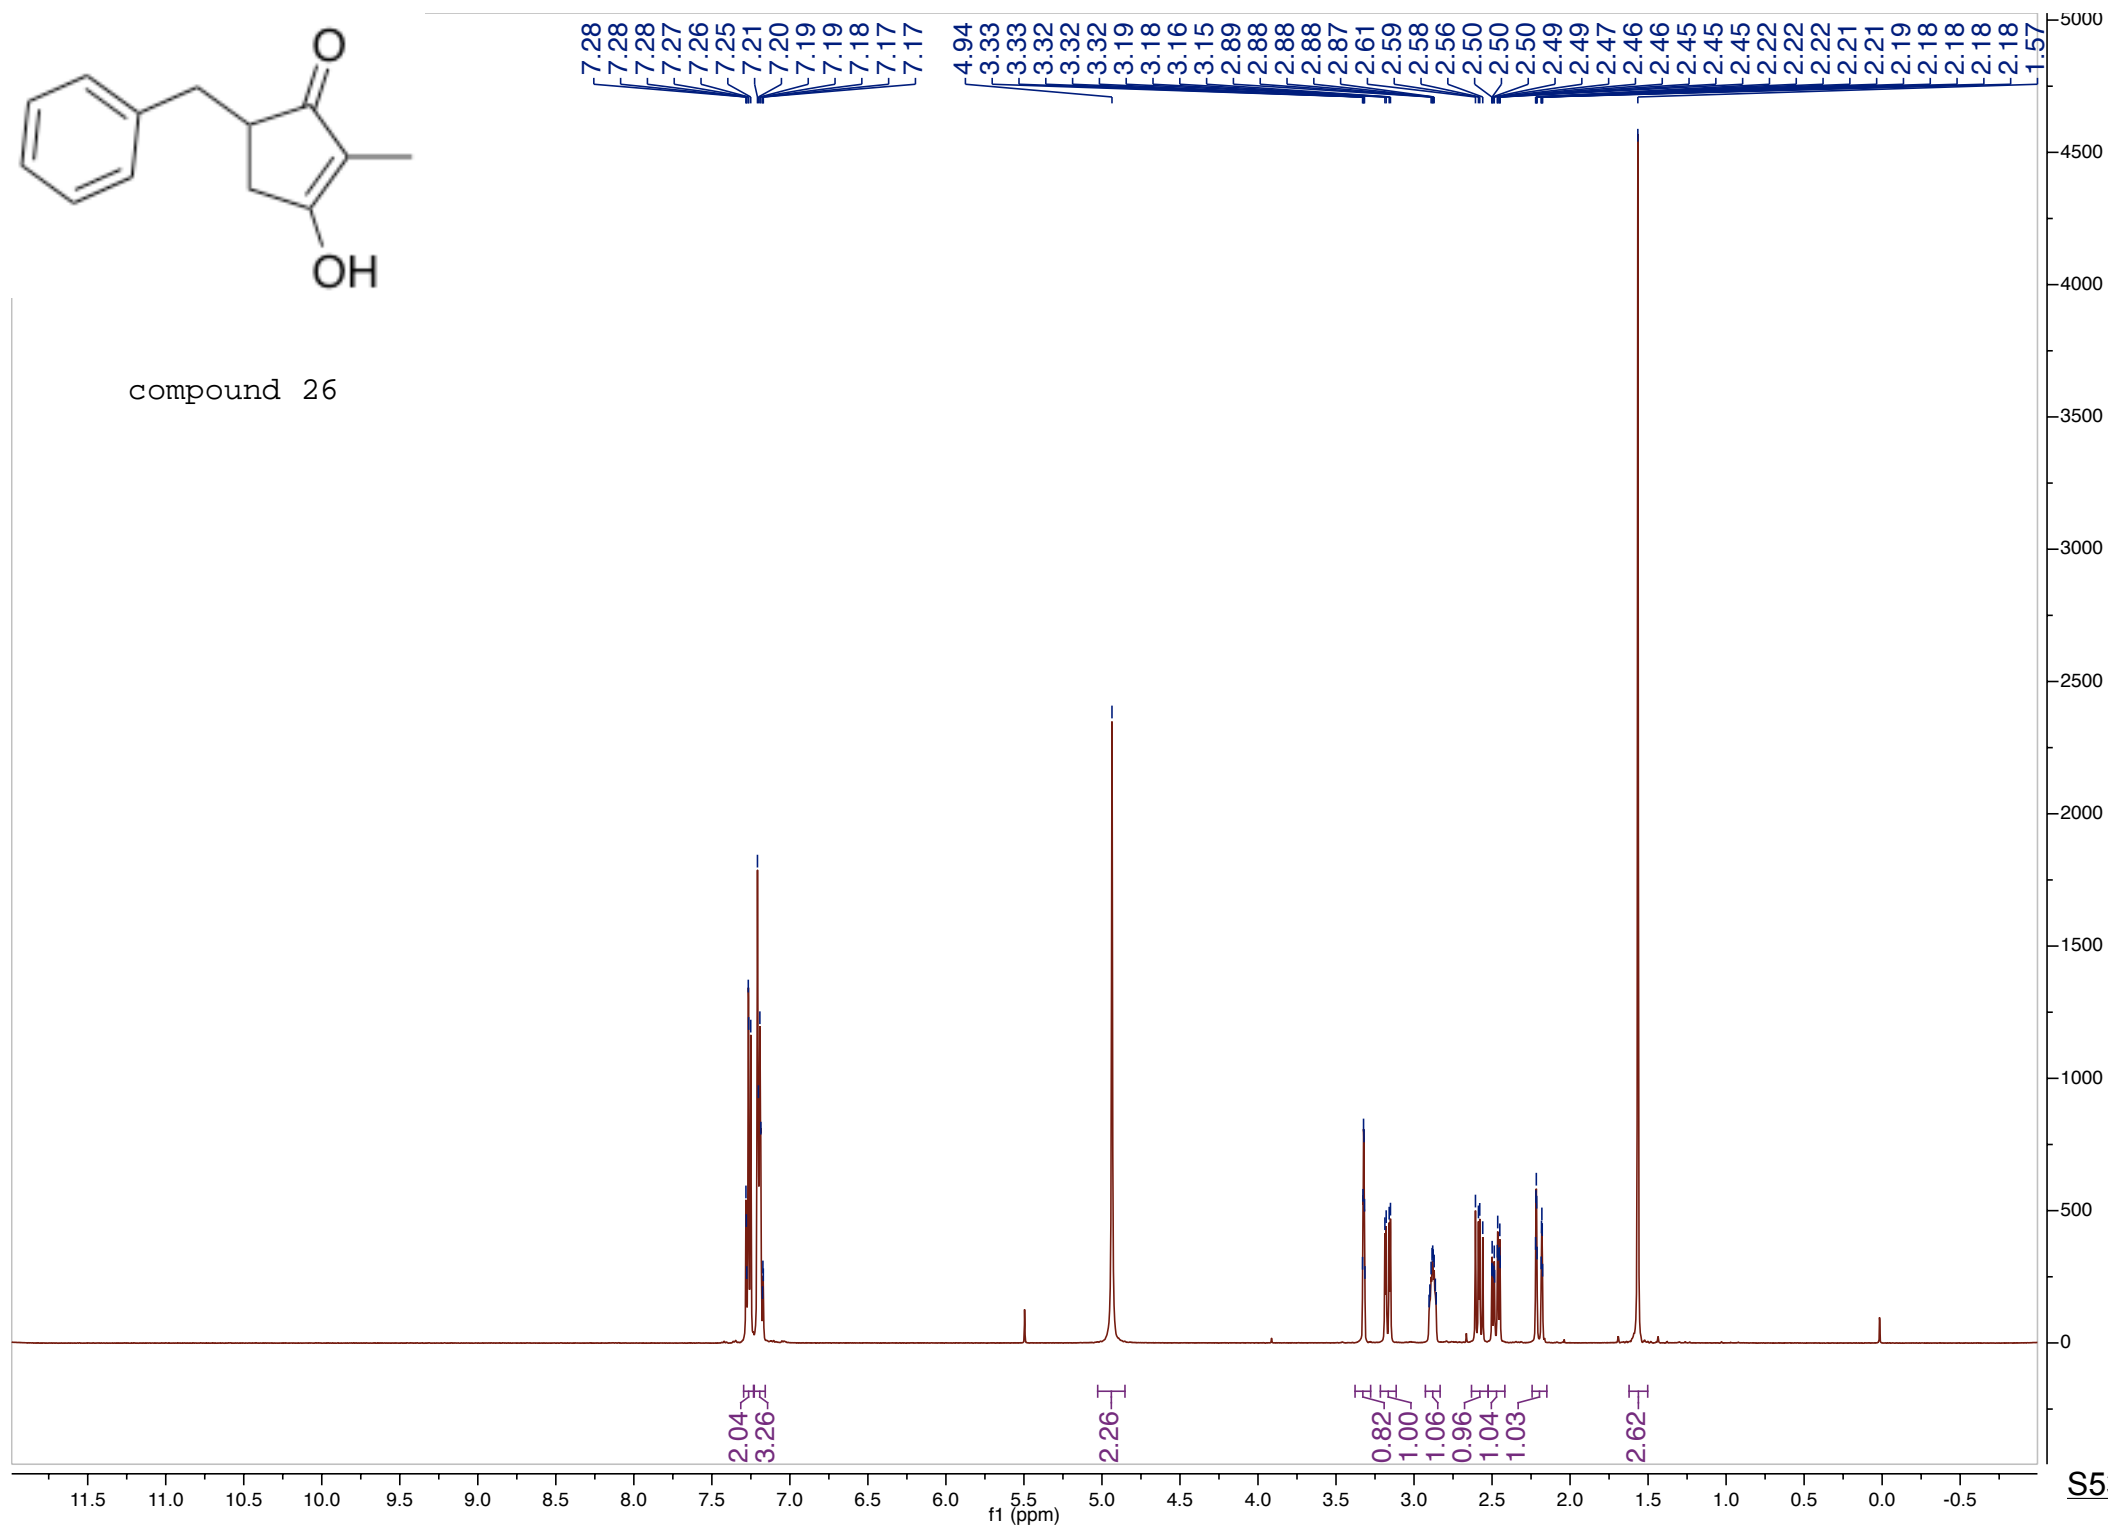



compound 26

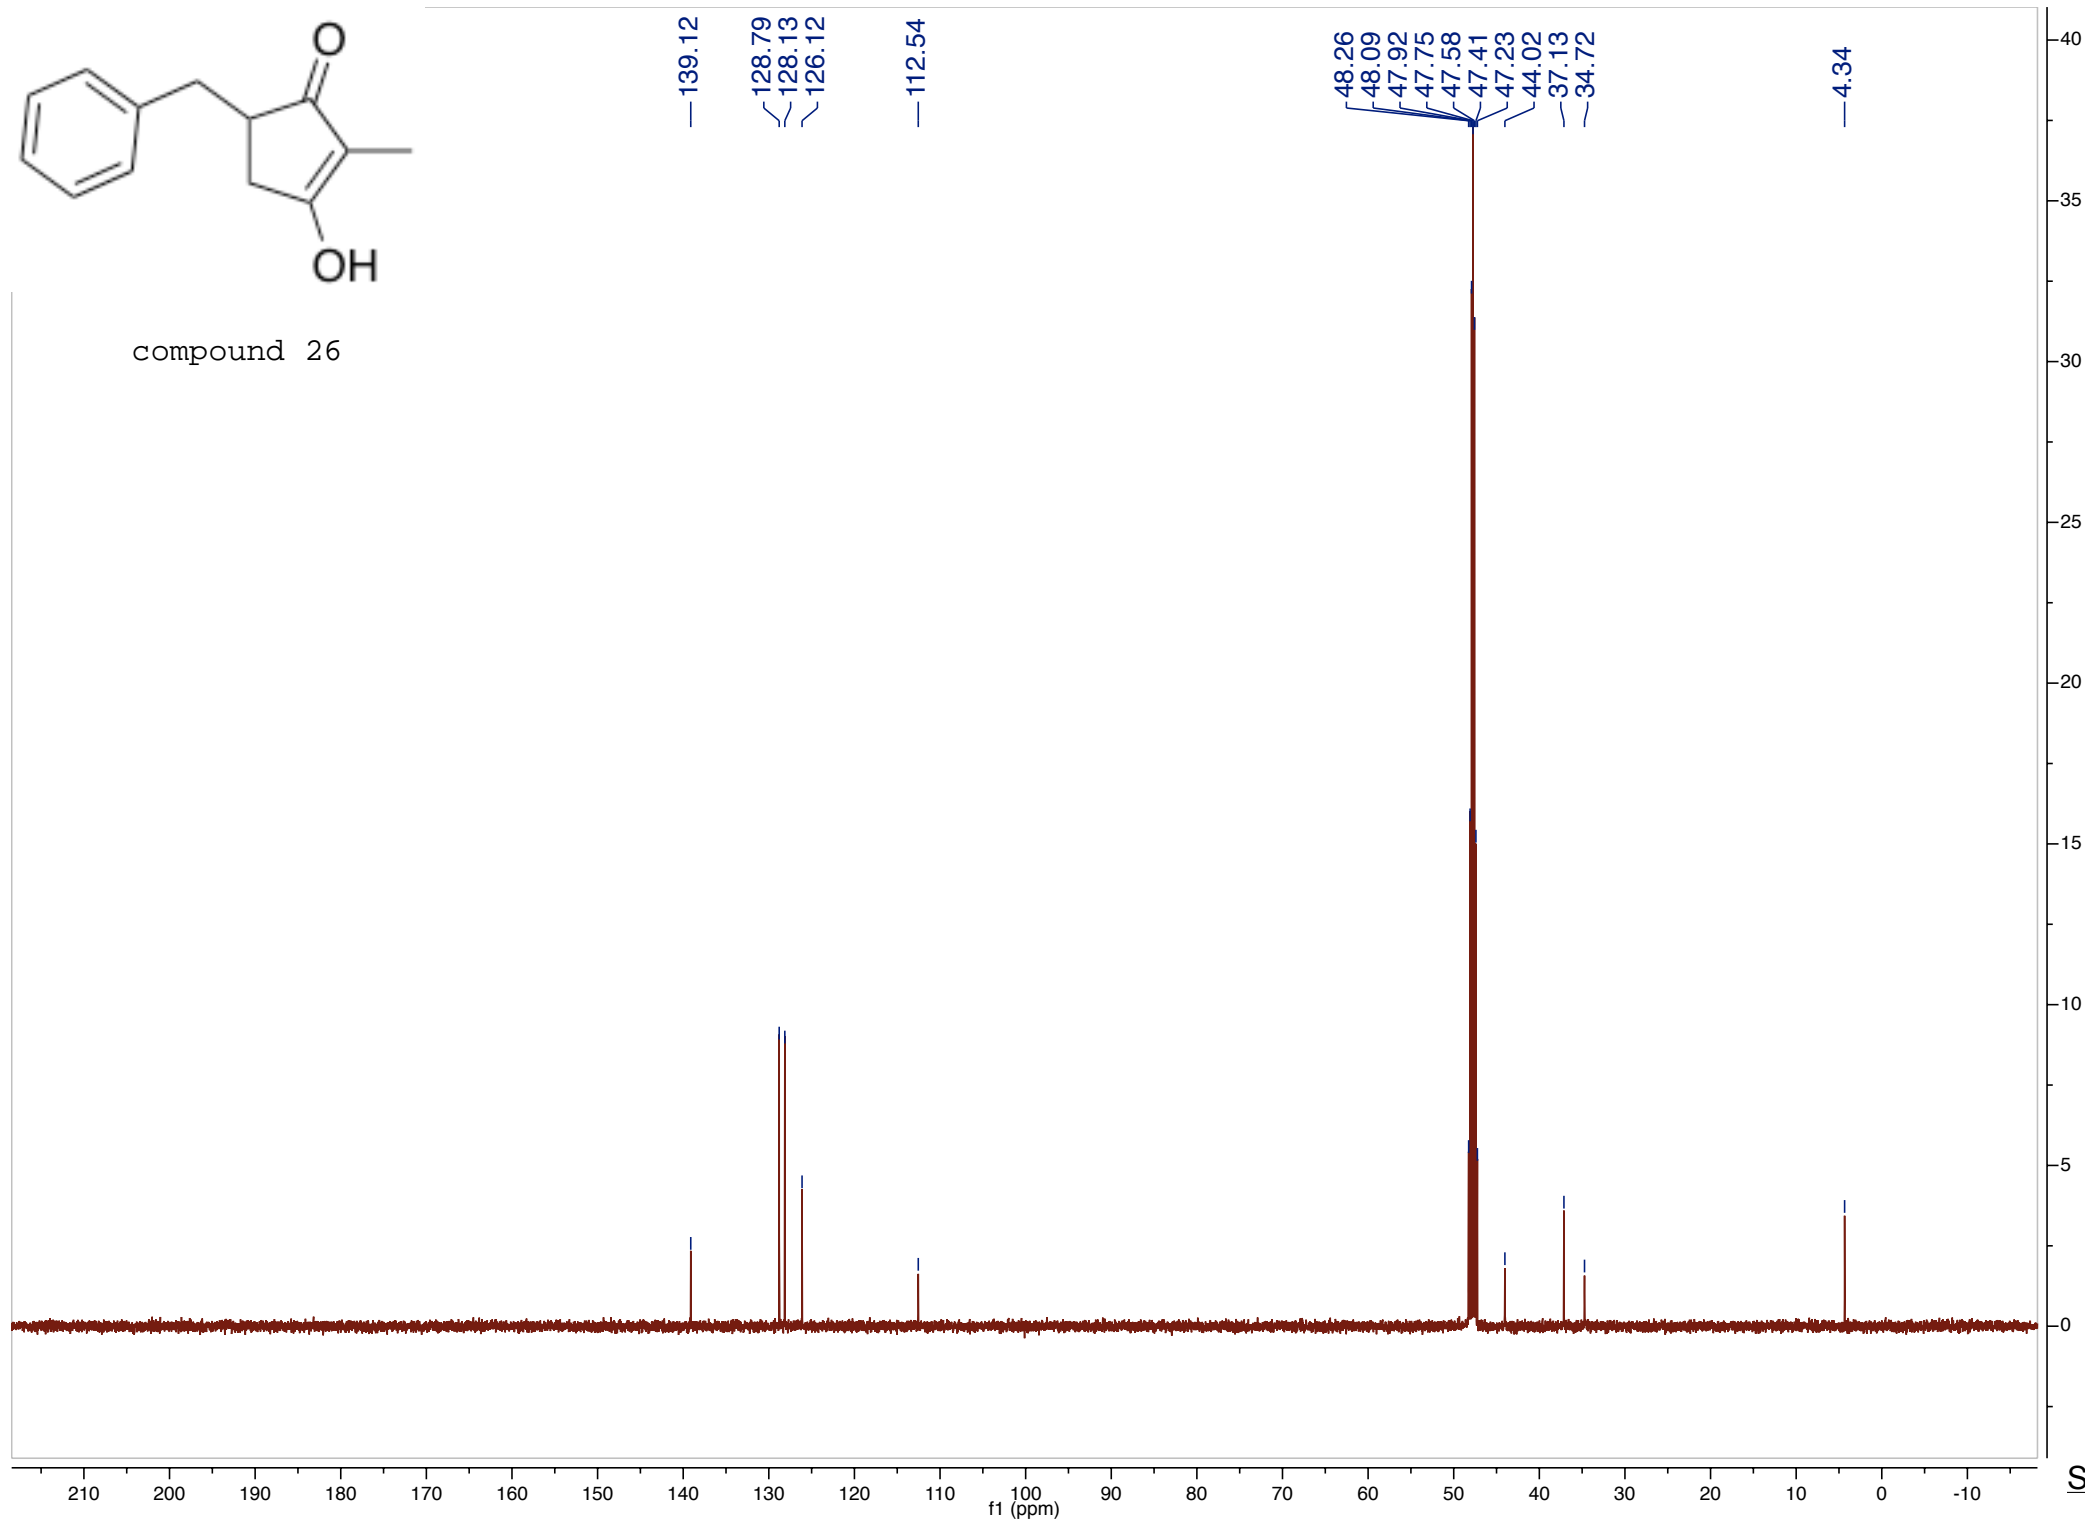

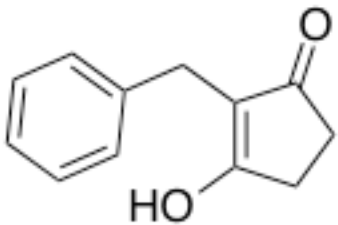

compound 27

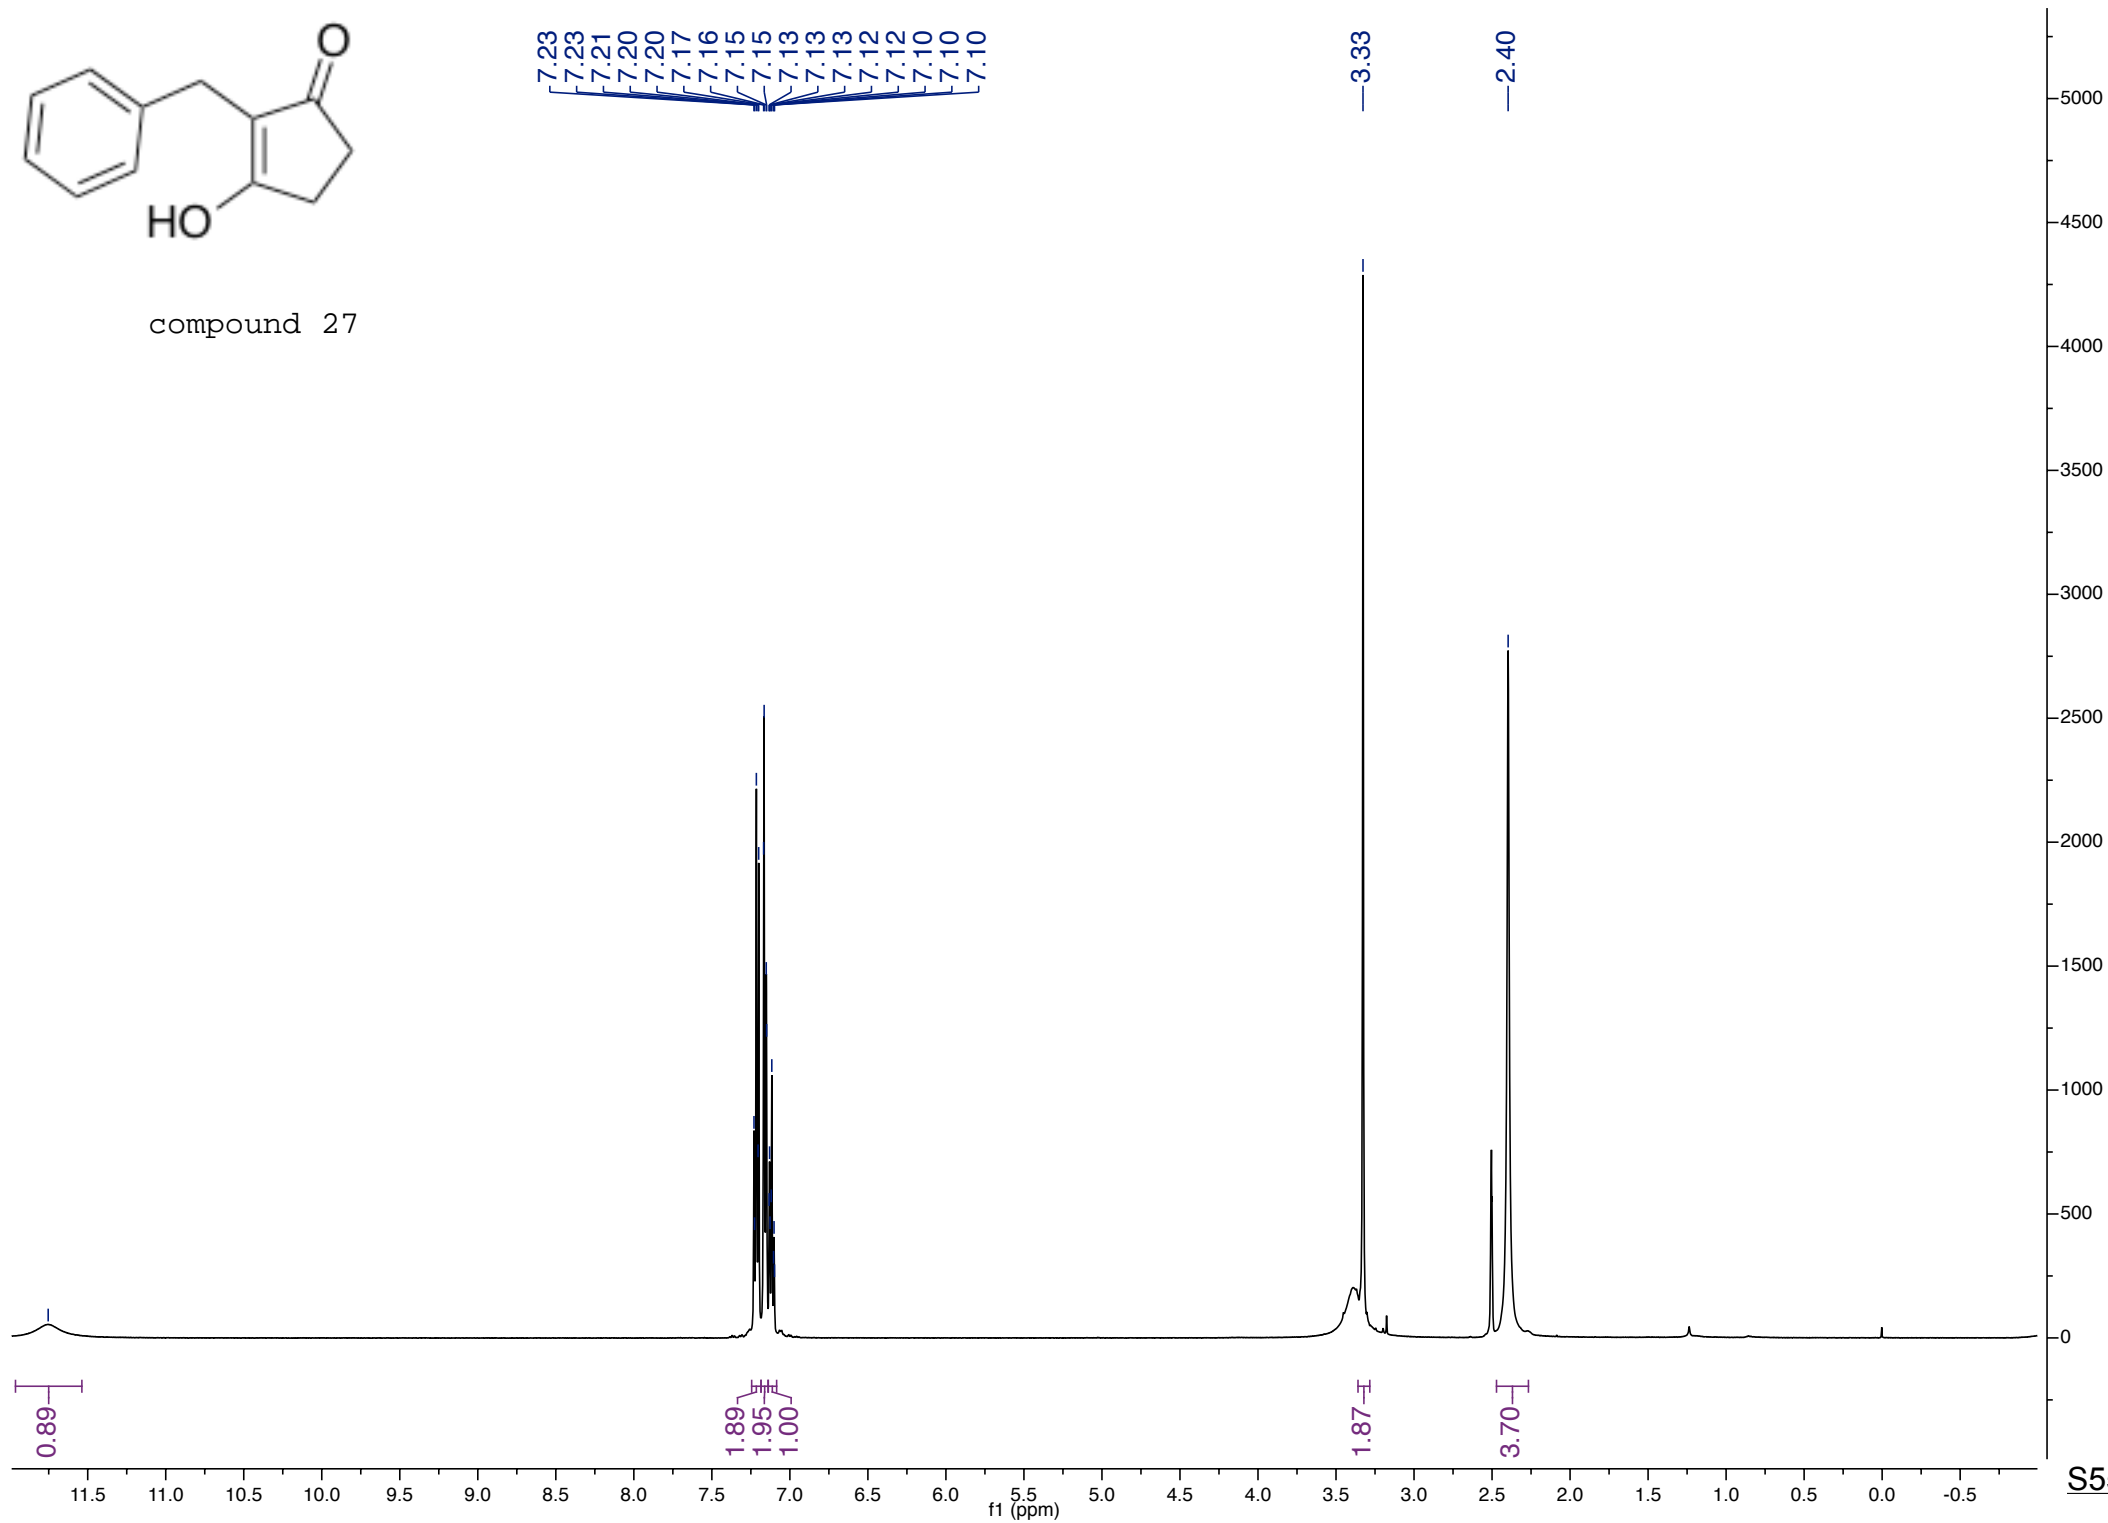

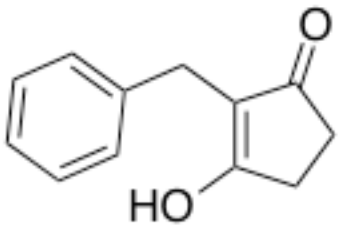

compound 27

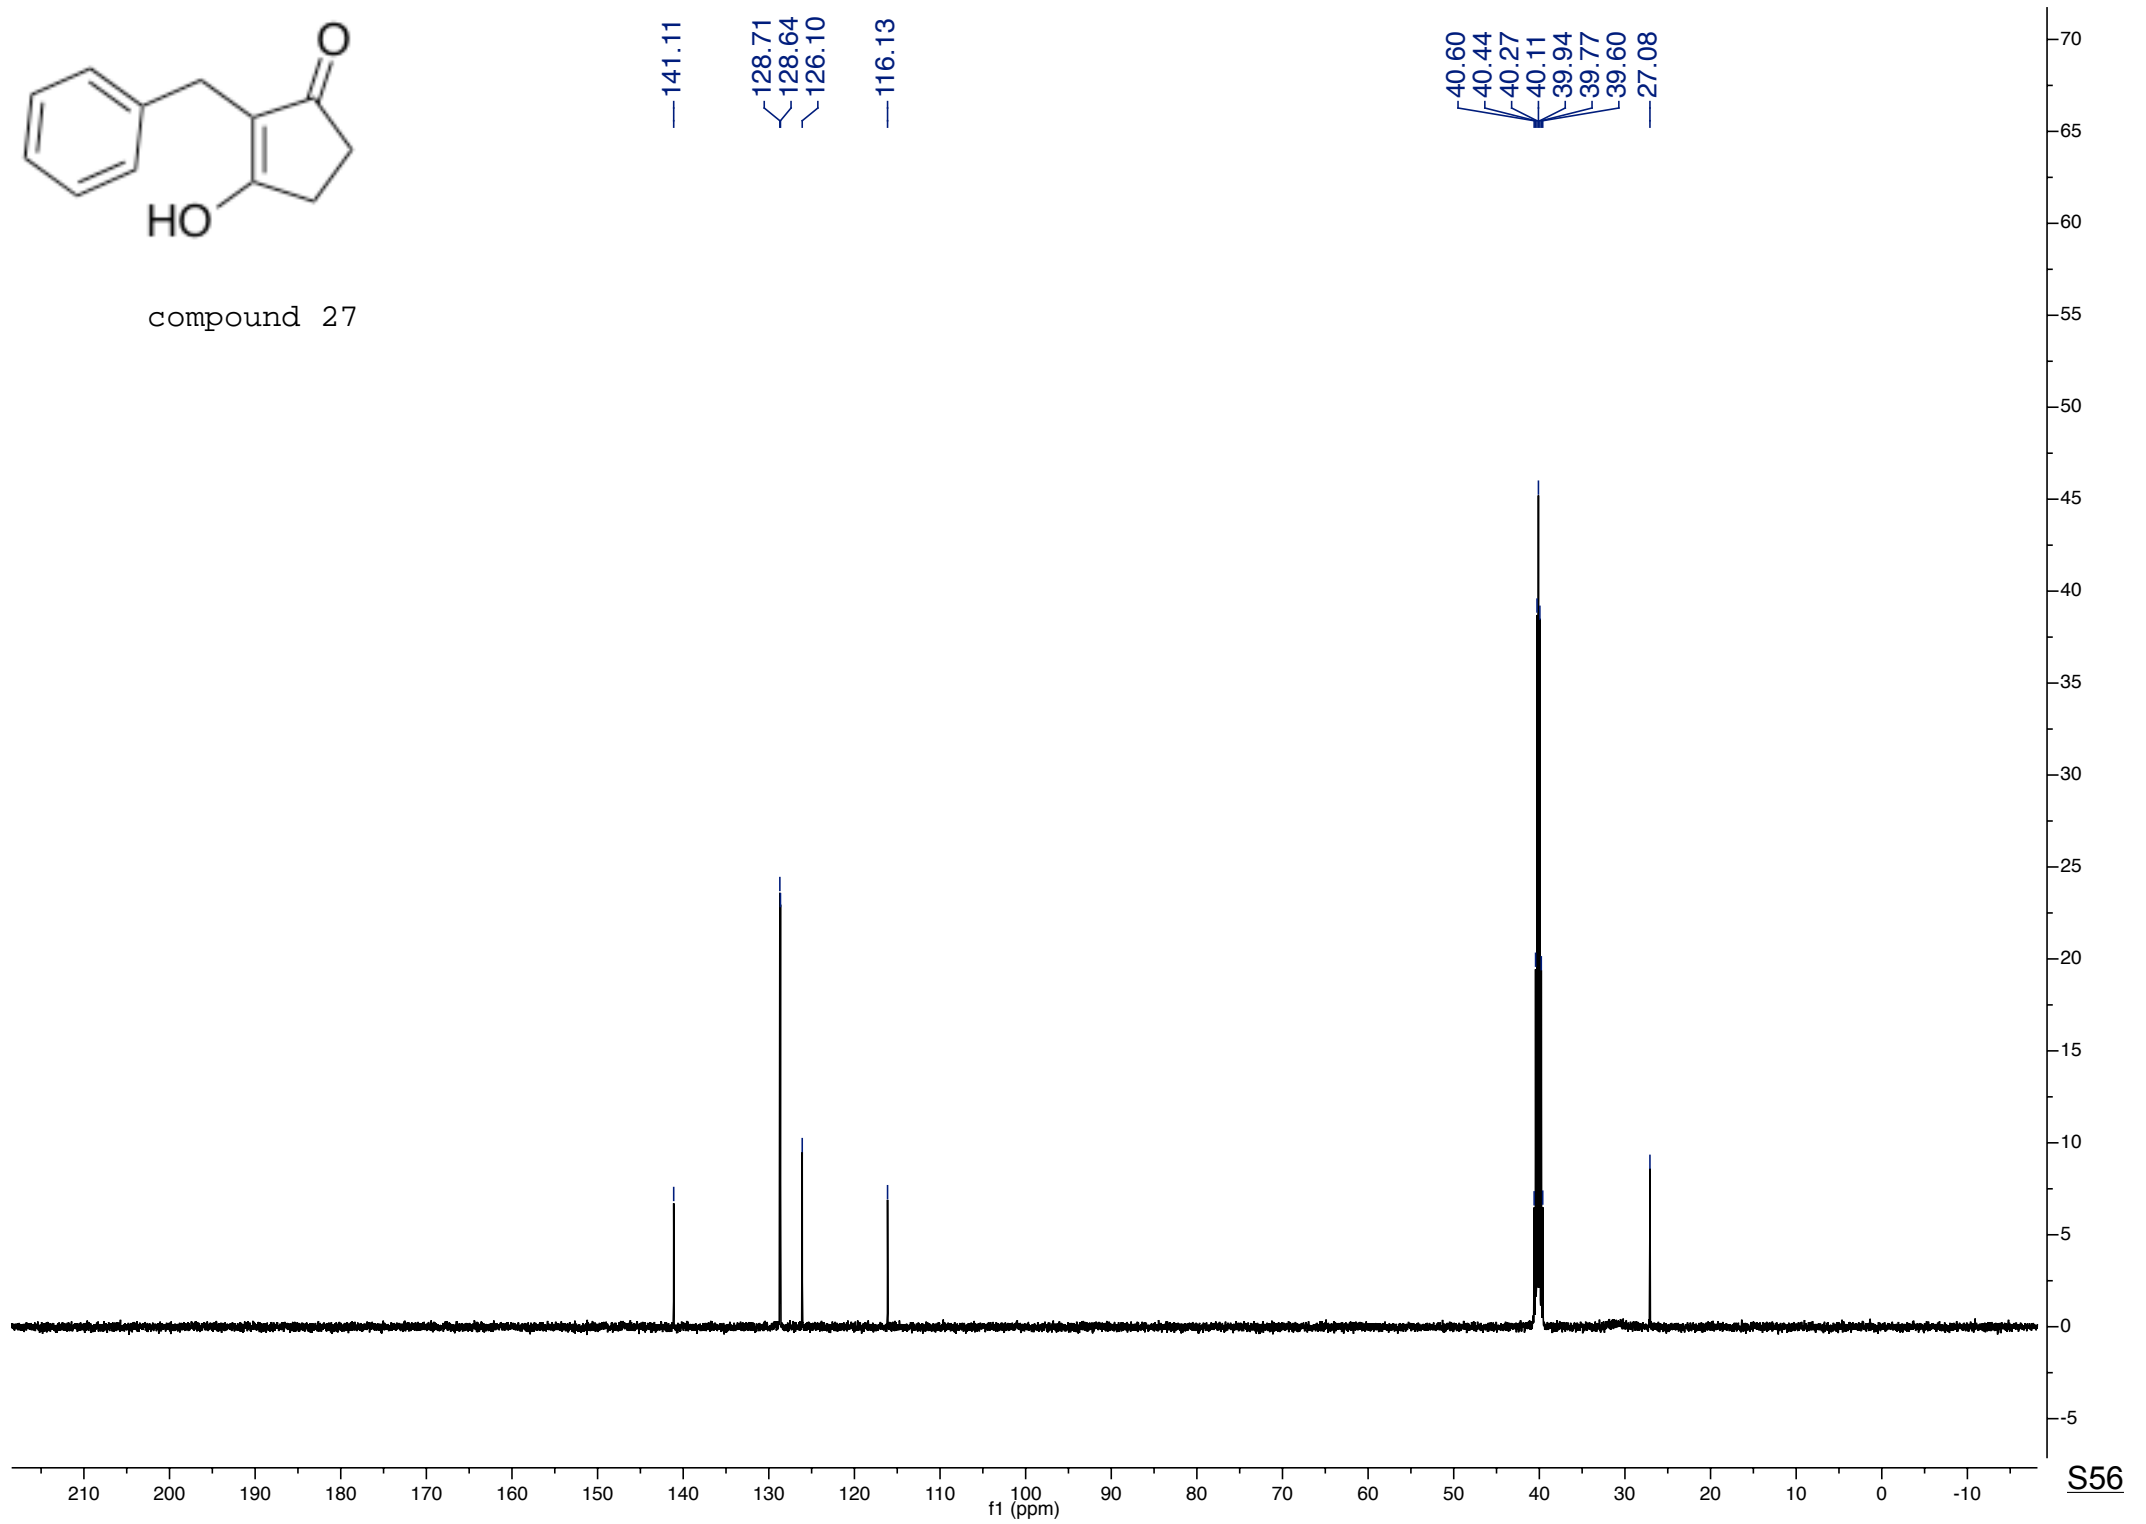



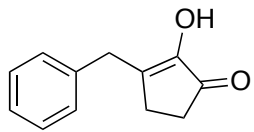

compound 28

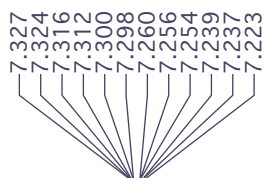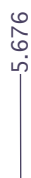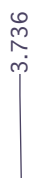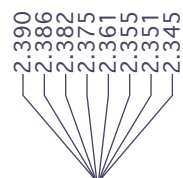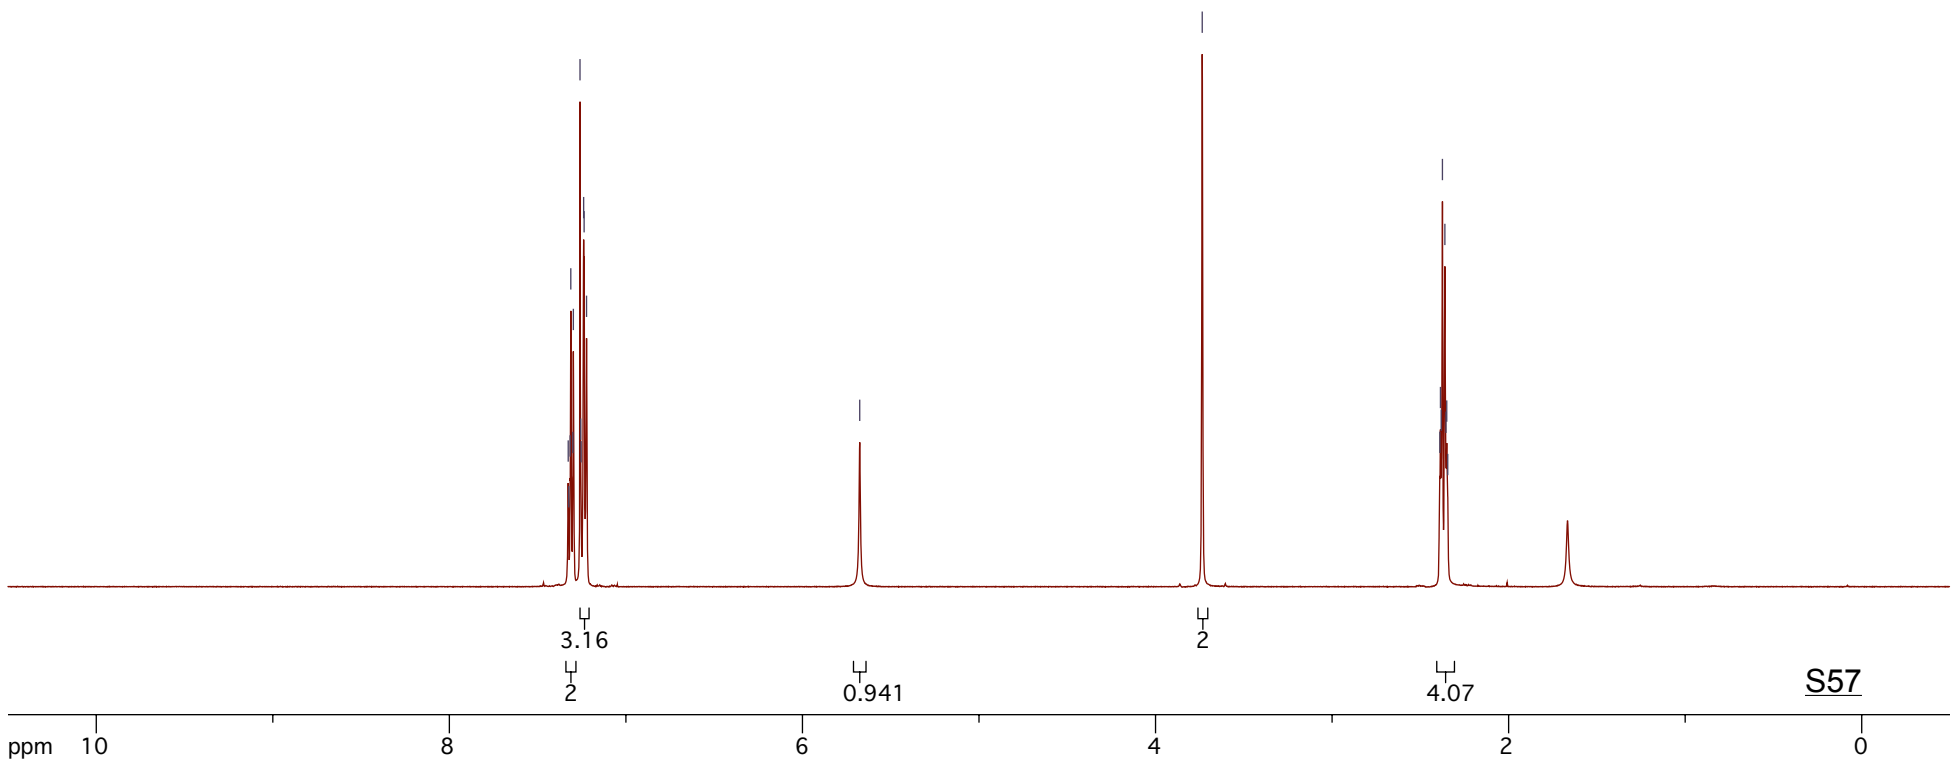

203.727

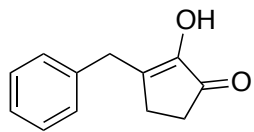

compound 28

148.876

146.268

146.240

137.836

129.046

128.765

126.707

77.414

77.160

76.906

34.983

32.055

24.856

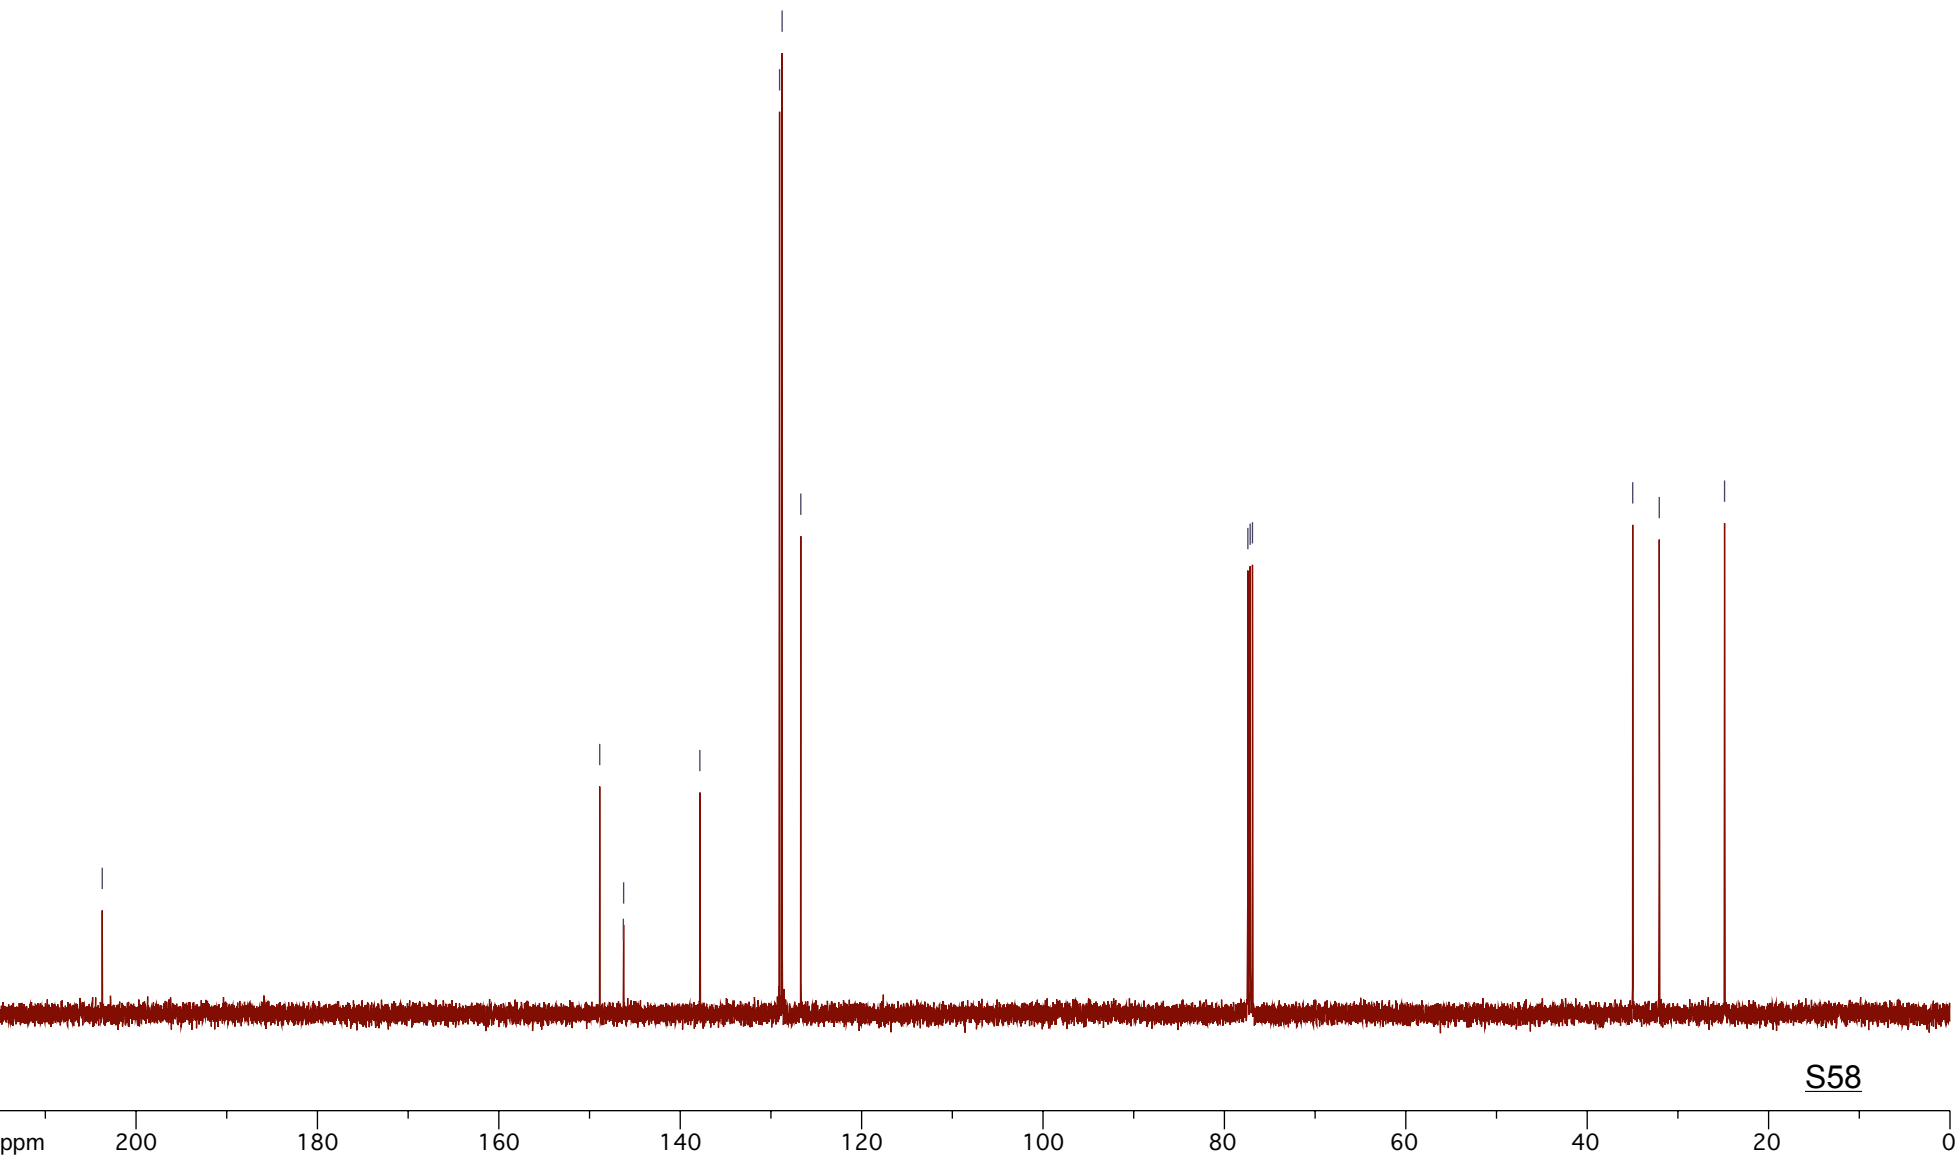

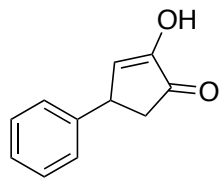

compound 29

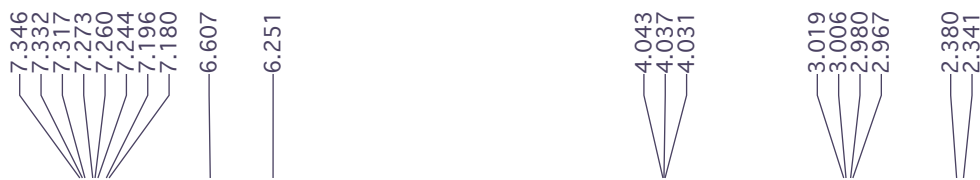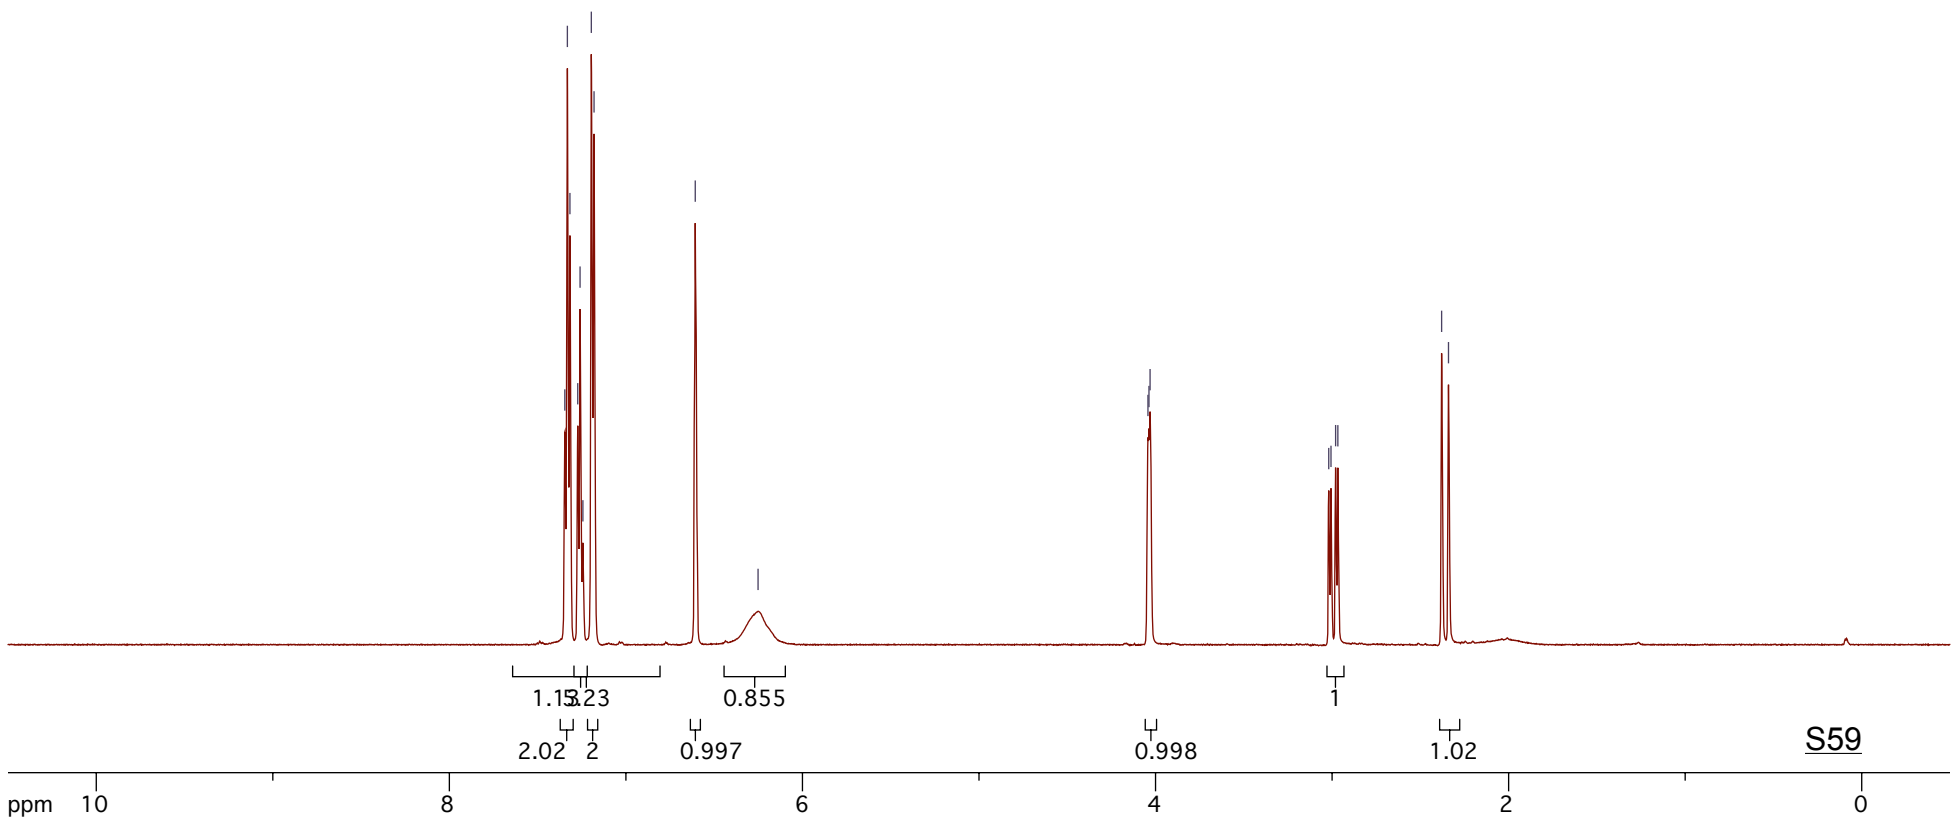

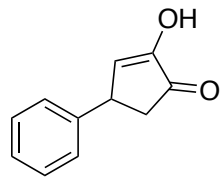

compound 29

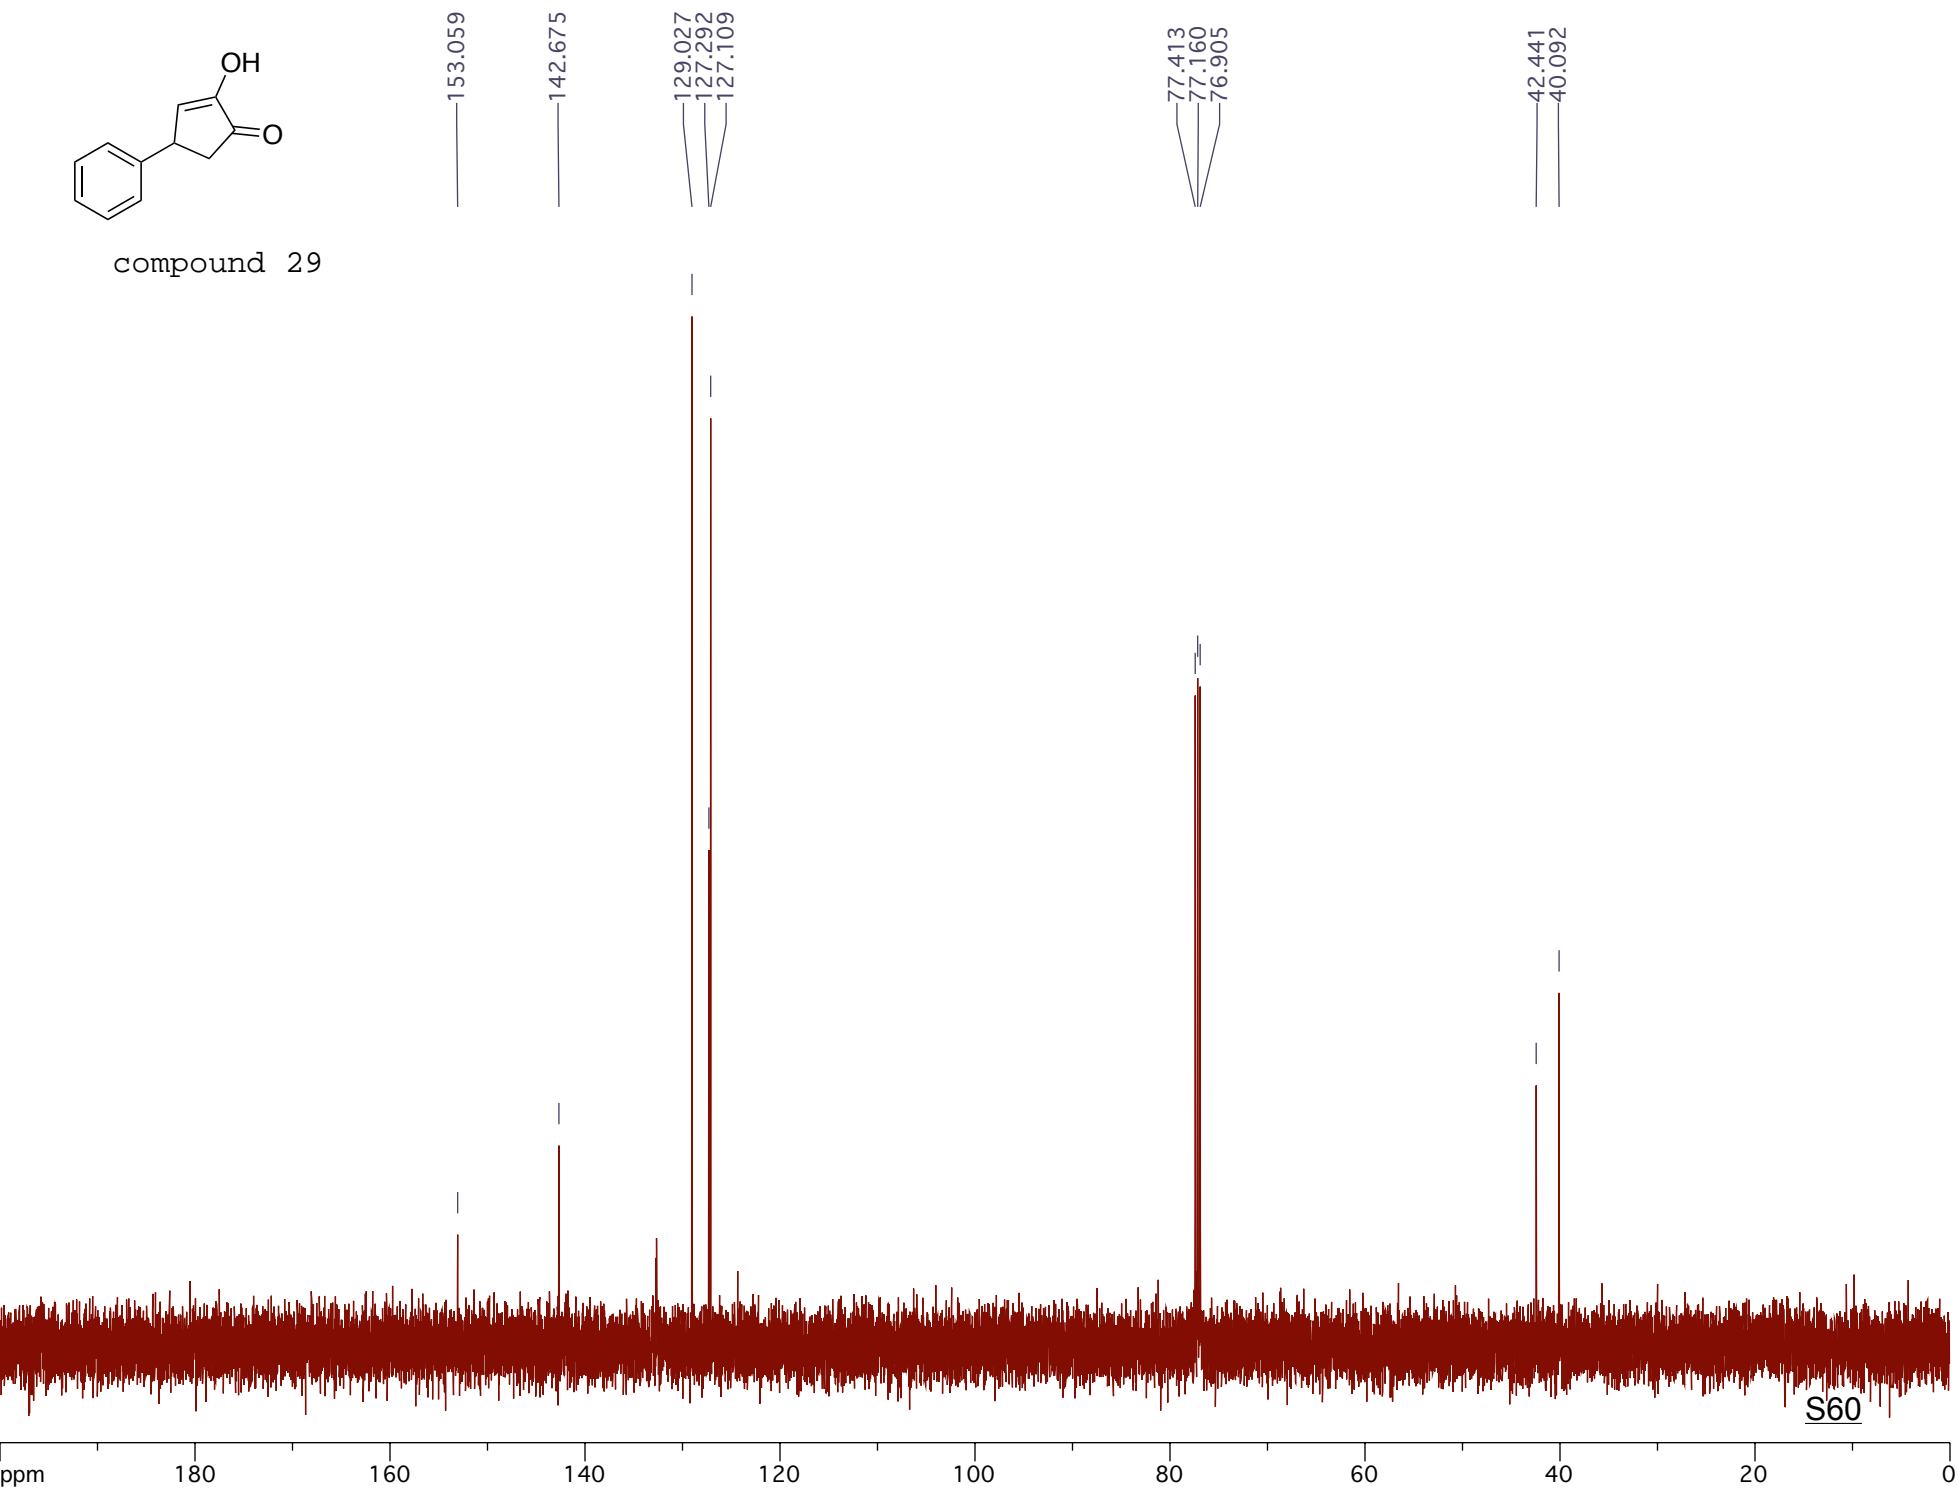

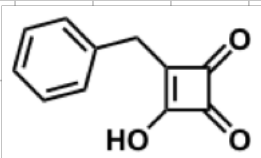

compound 30

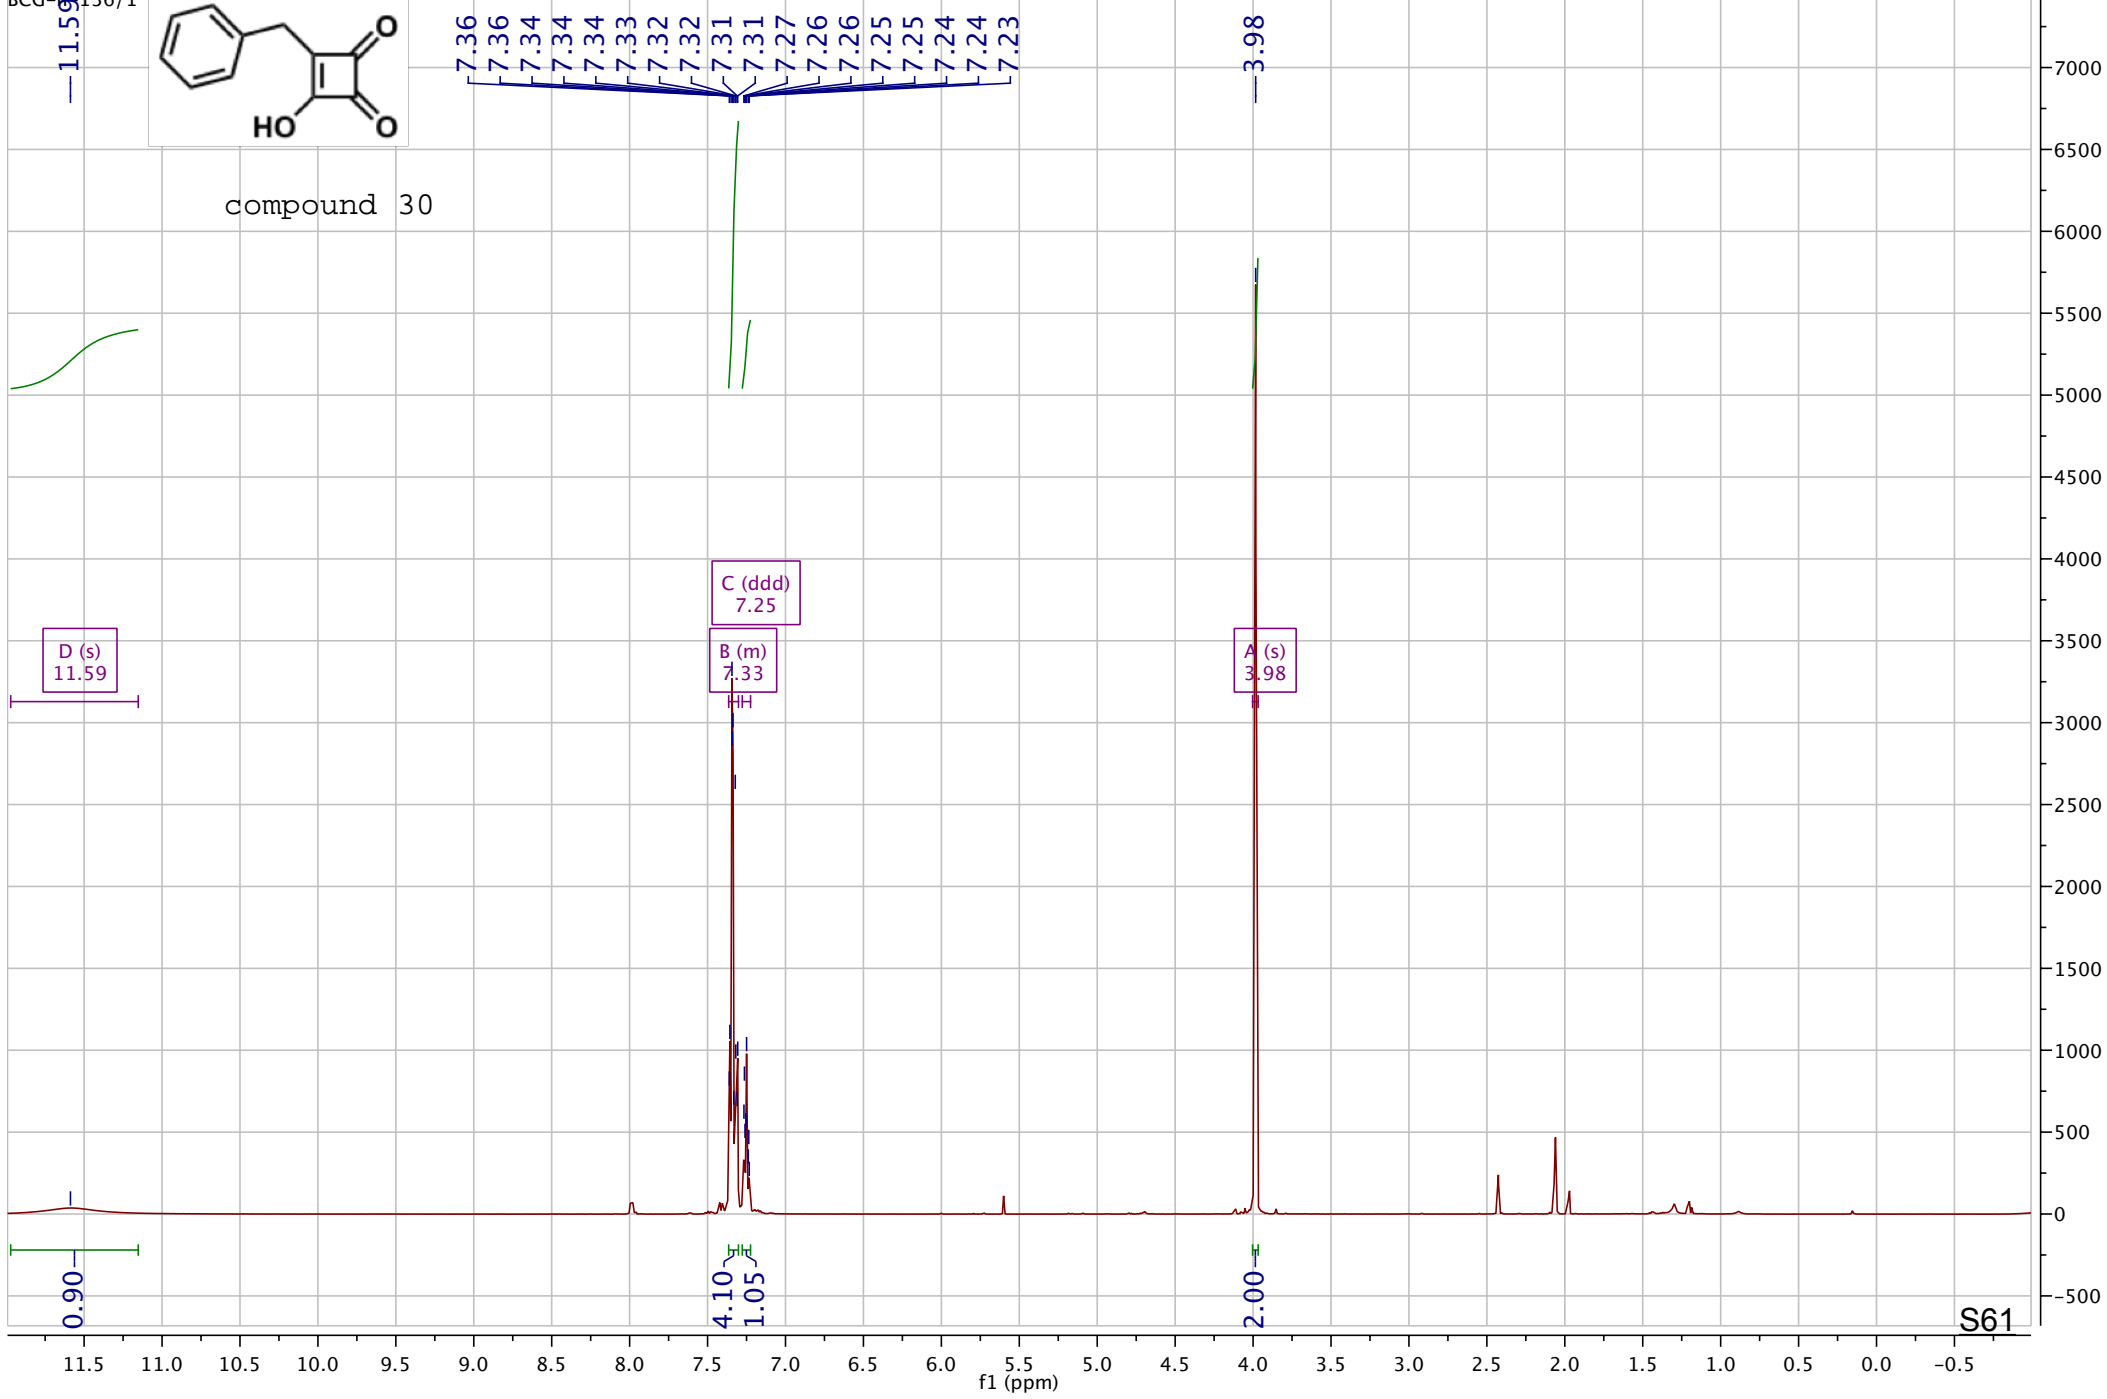

197.62  
196.60

181.33

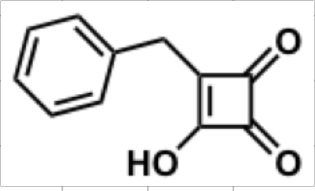

compound 30

136.20  
129.27  
129.20  
127.35

30.40

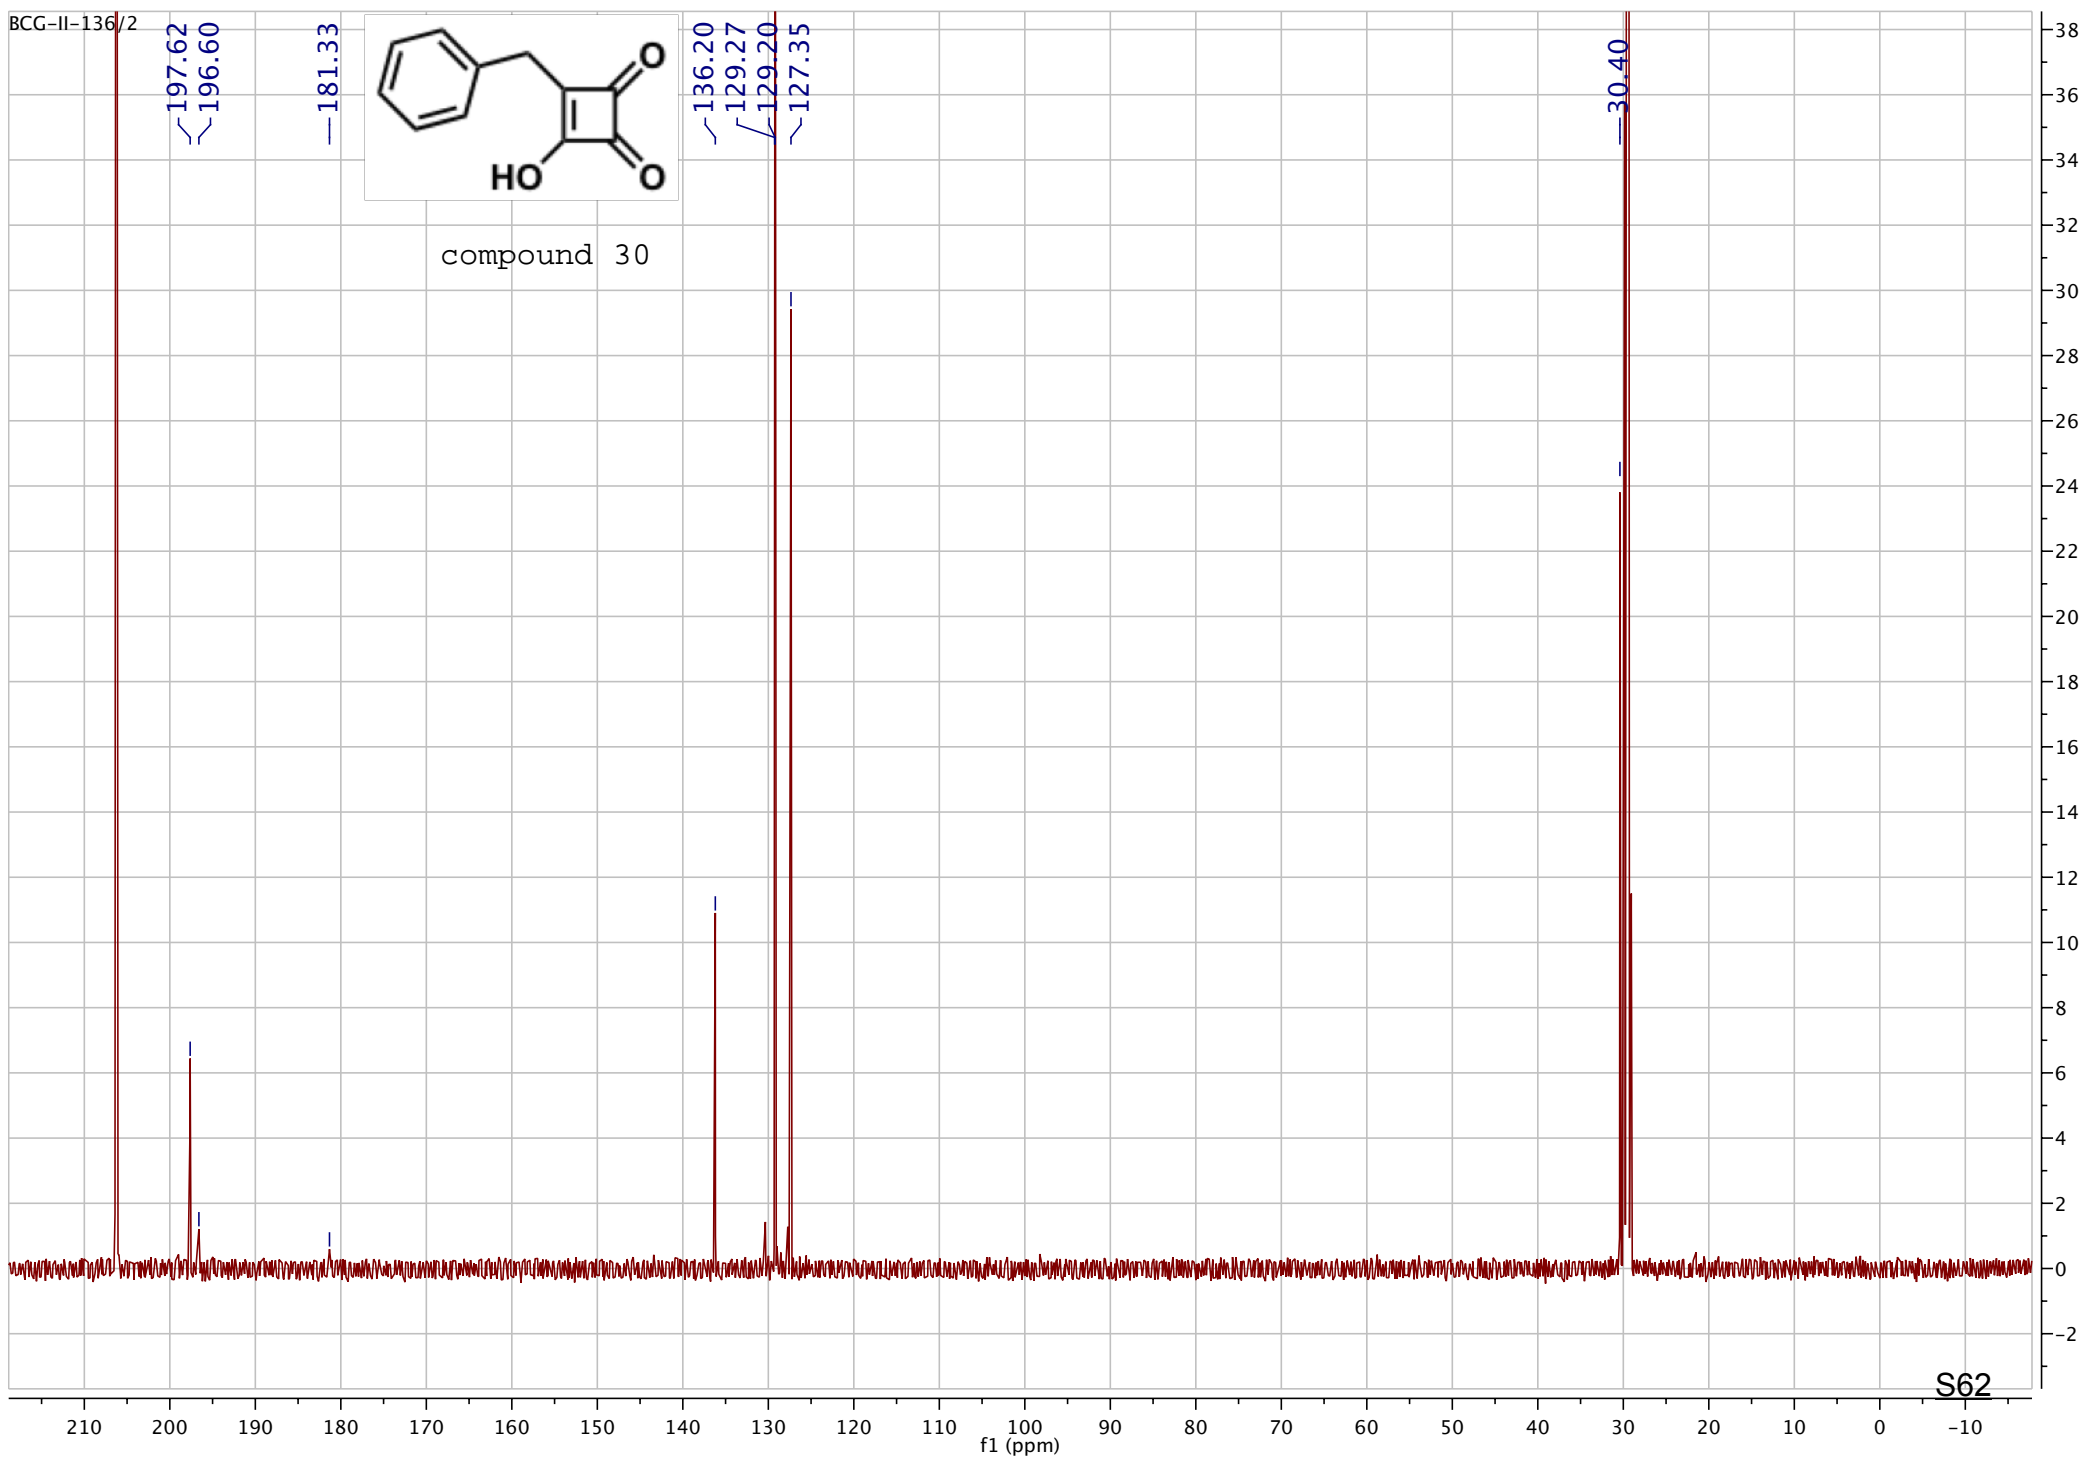

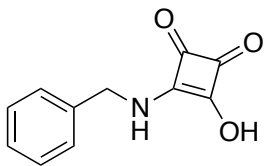

compound 31

8.883  
8.871  
8.859

7.374  
7.359  
7.344  
7.303  
7.297  
7.296  
7.289  
7.280  
7.266

4.592  
4.579

2.500

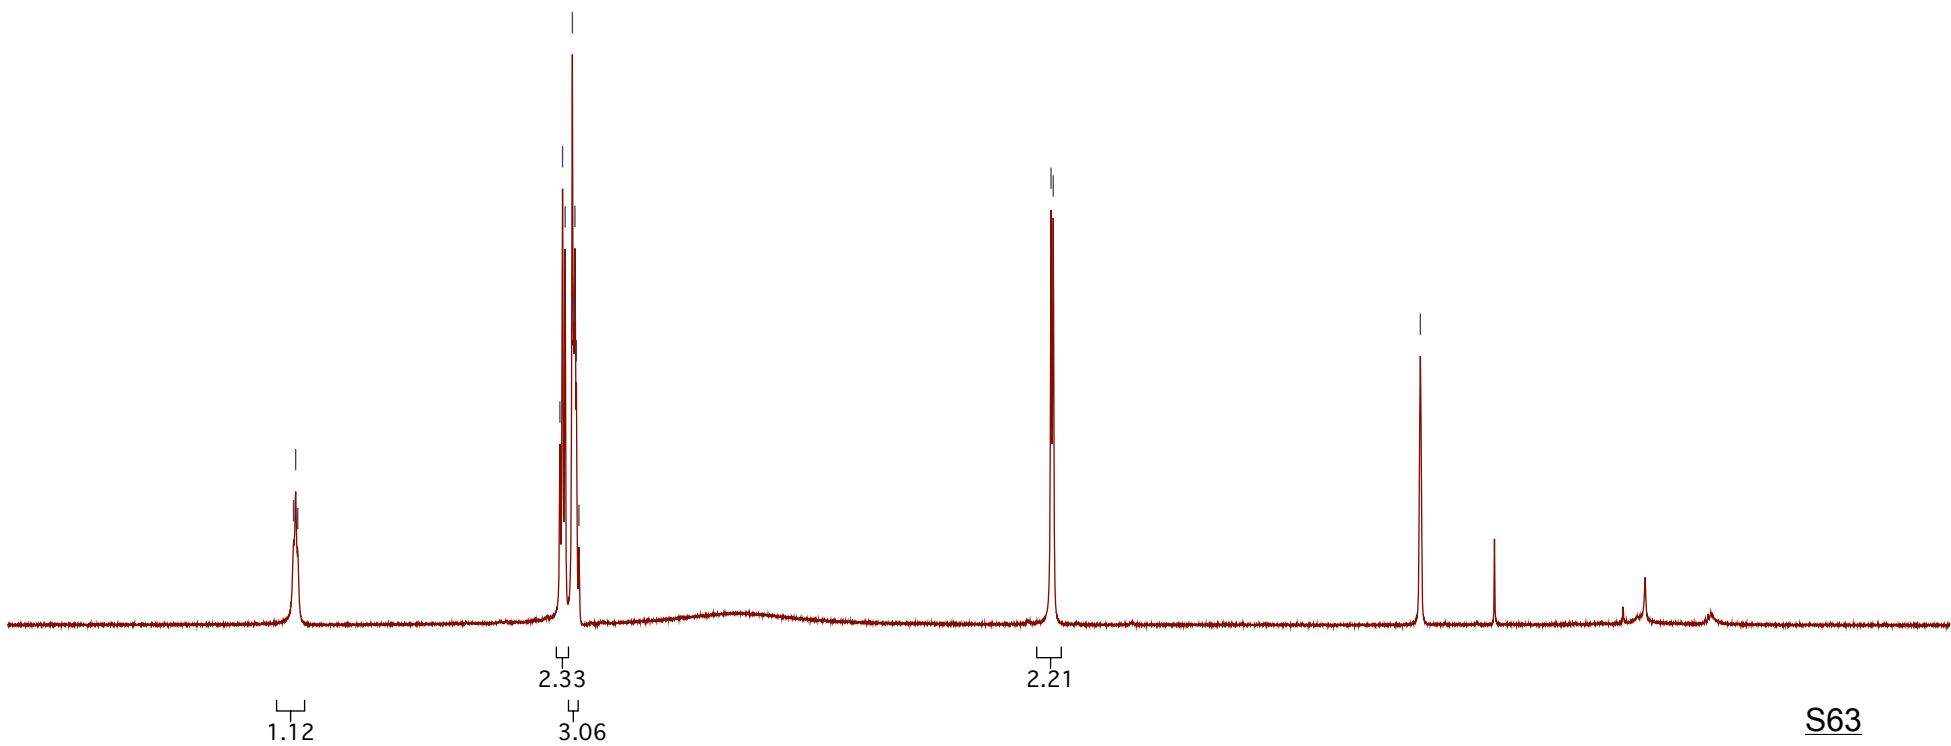

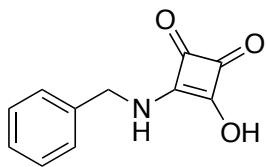

compound 31

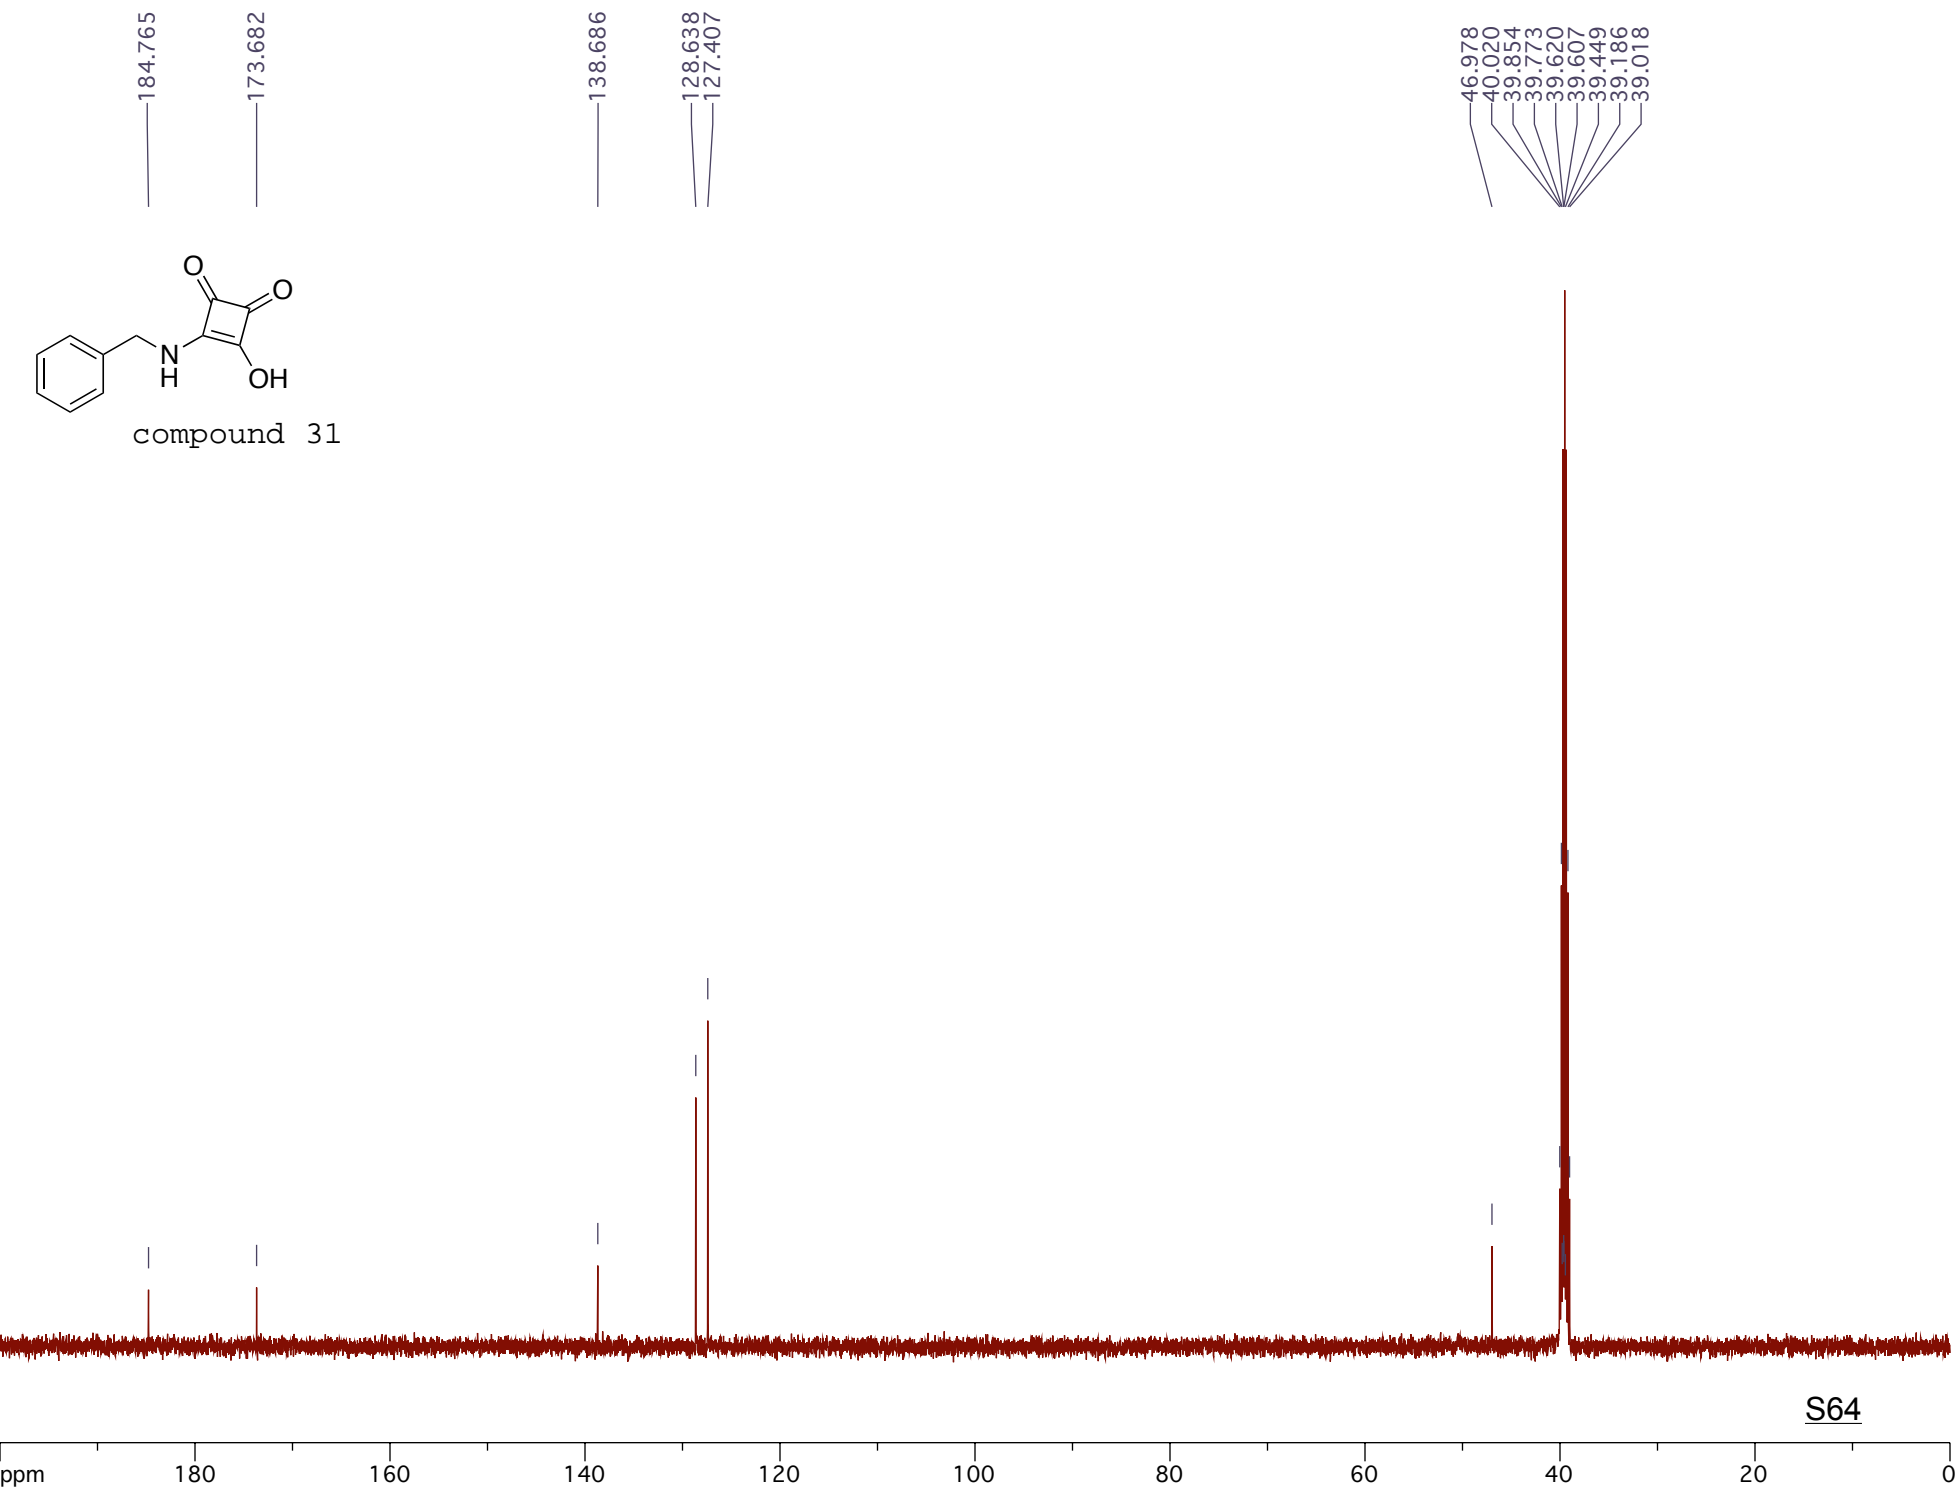



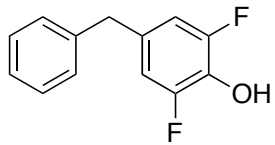

compound 32

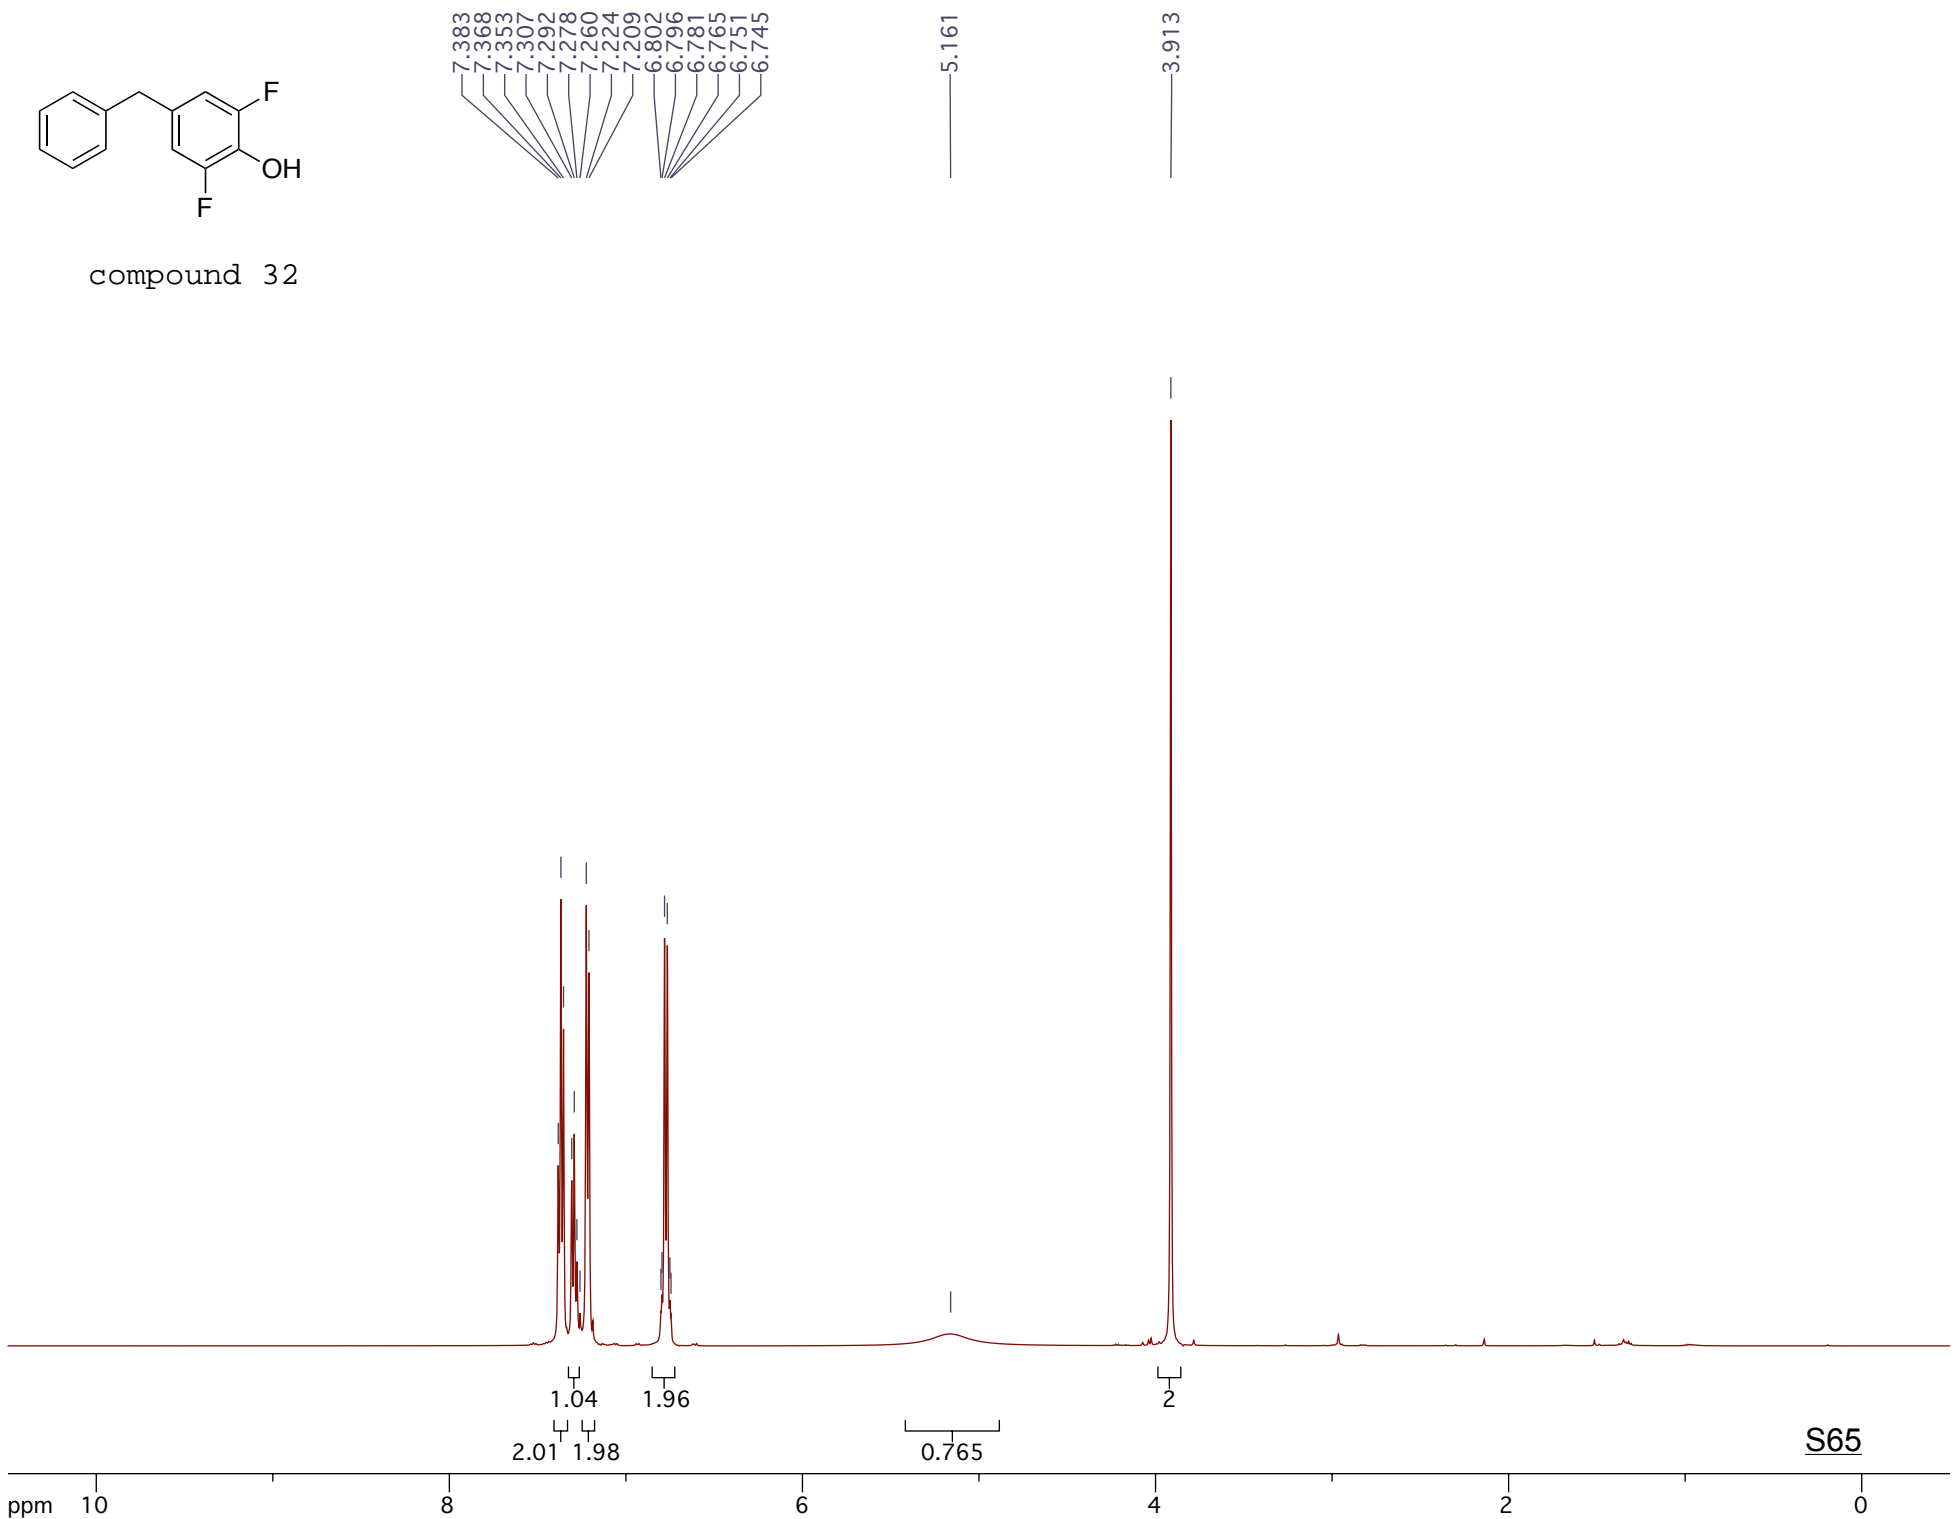

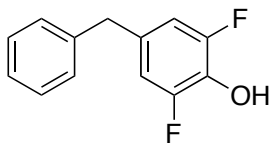

compound 32

152.643  
152.598  
150.715  
150.669

140.003  
133.461  
133.400  
133.340  
131.011  
130.883  
130.754  
128.746  
126.602

112.051  
112.004  
111.927  
111.879  
111.849

77.415  
77.160  
76.906

41.015

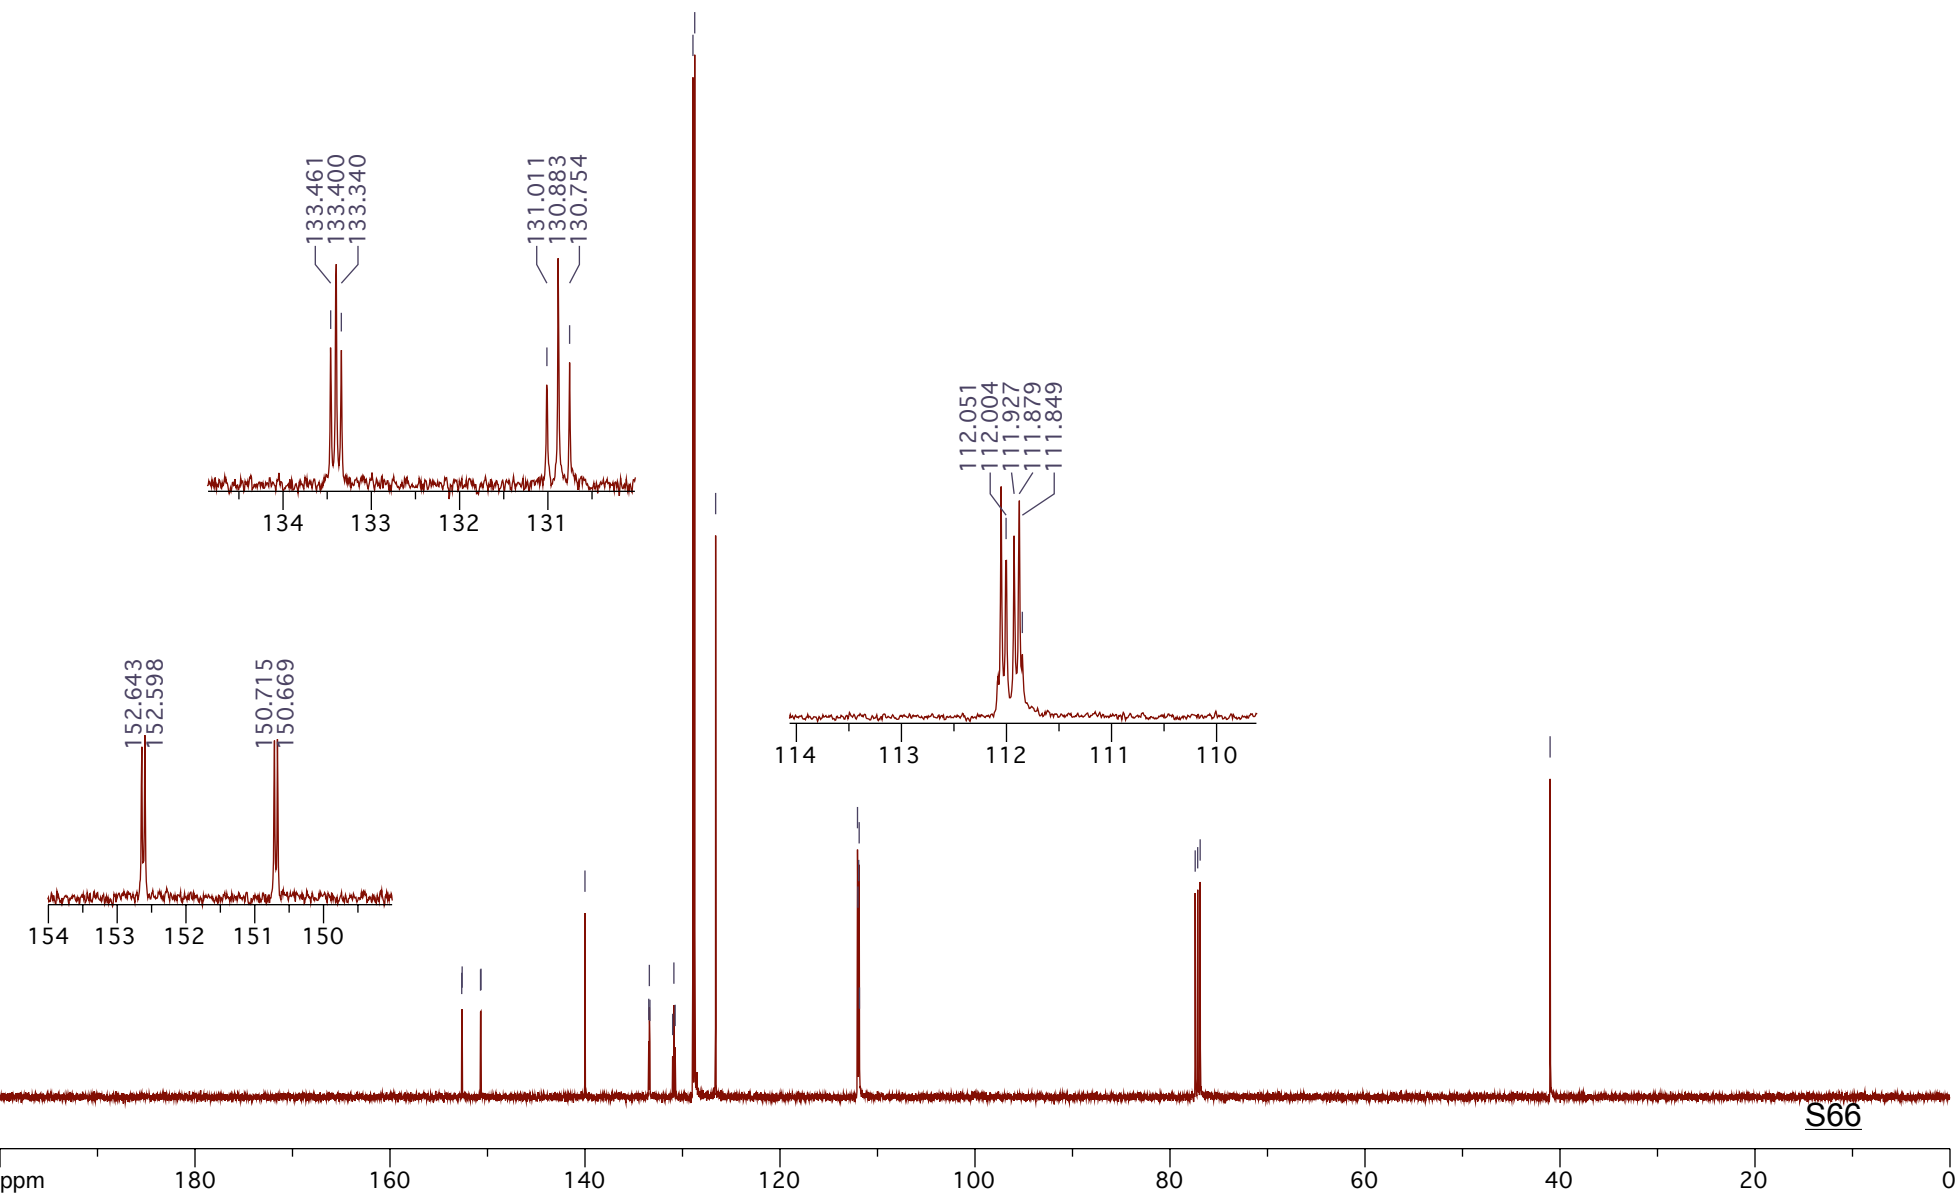

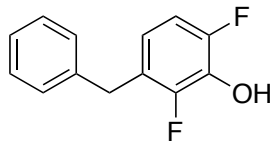

compound 33

7.316  
7.301  
7.286  
7.260  
7.237  
7.222  
7.209  
7.195  
6.838  
6.825  
6.818  
6.801  
6.798  
6.646  
6.634  
6.620  
6.618  
6.601

5.202

3.960

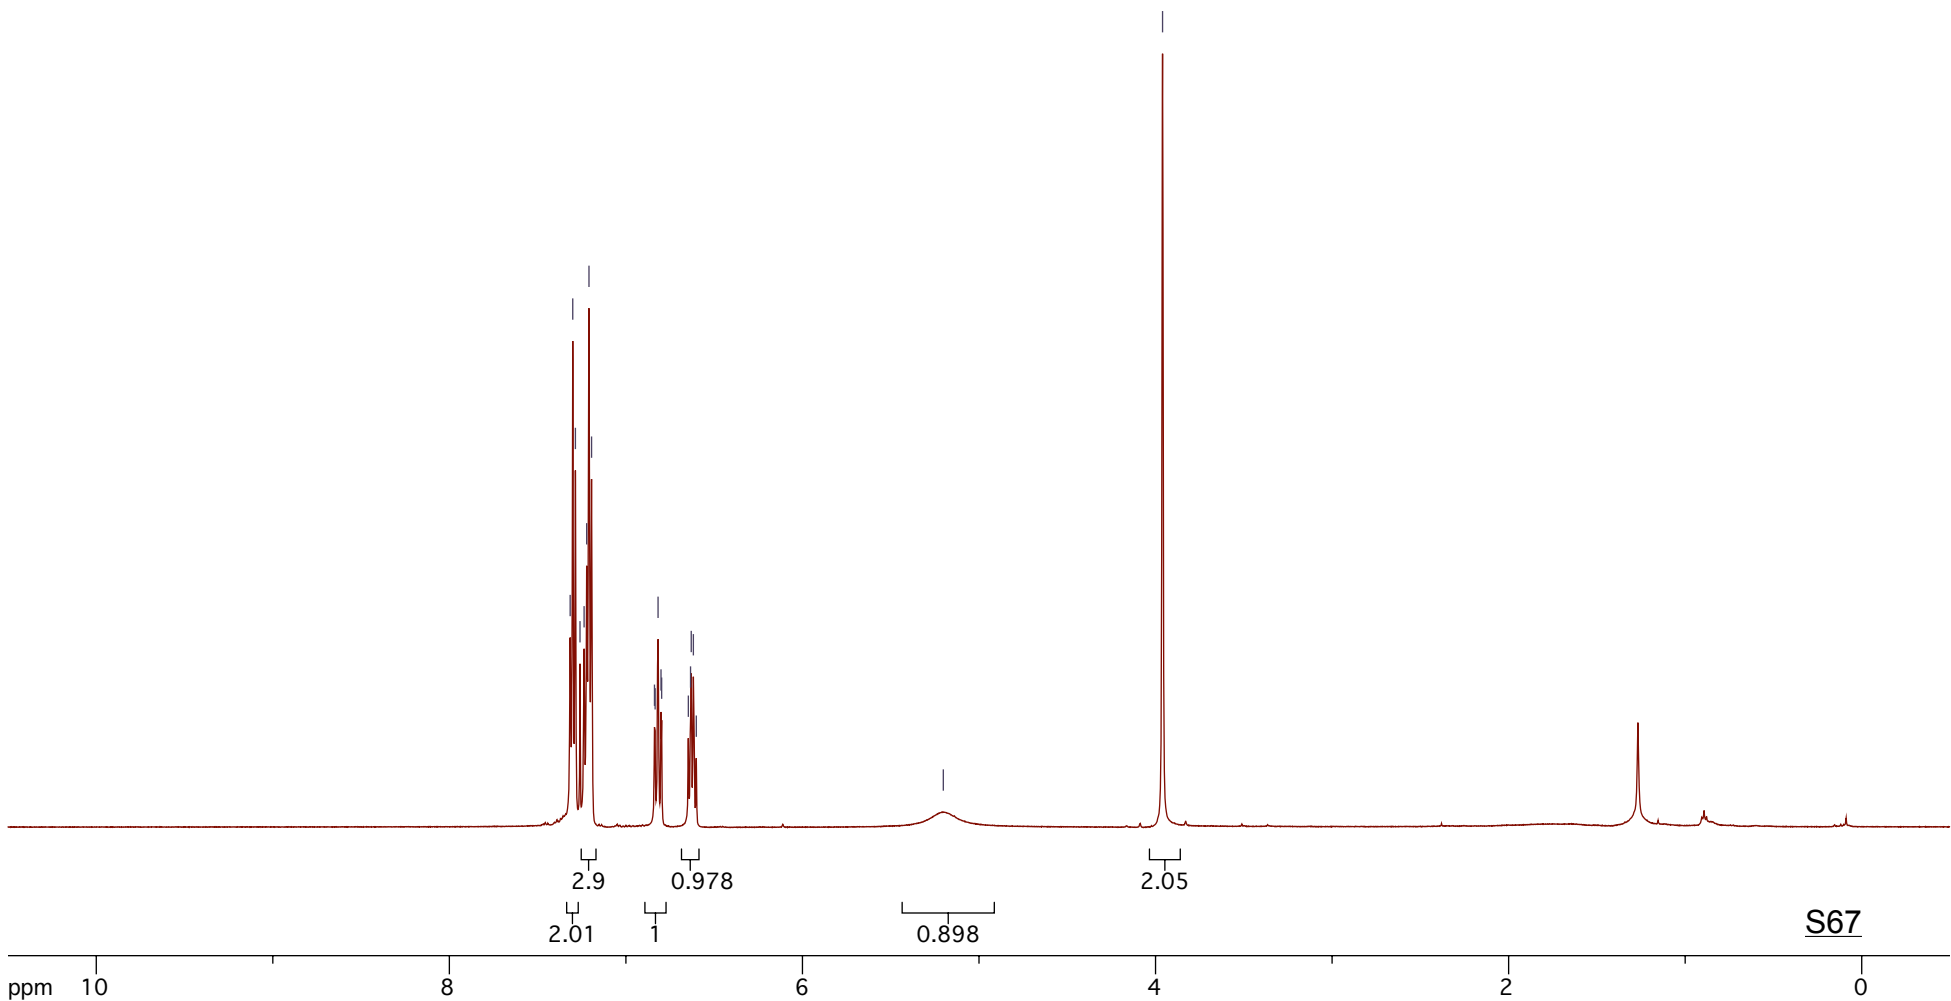

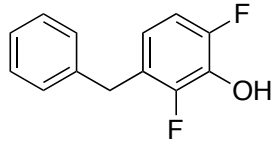

compound 33

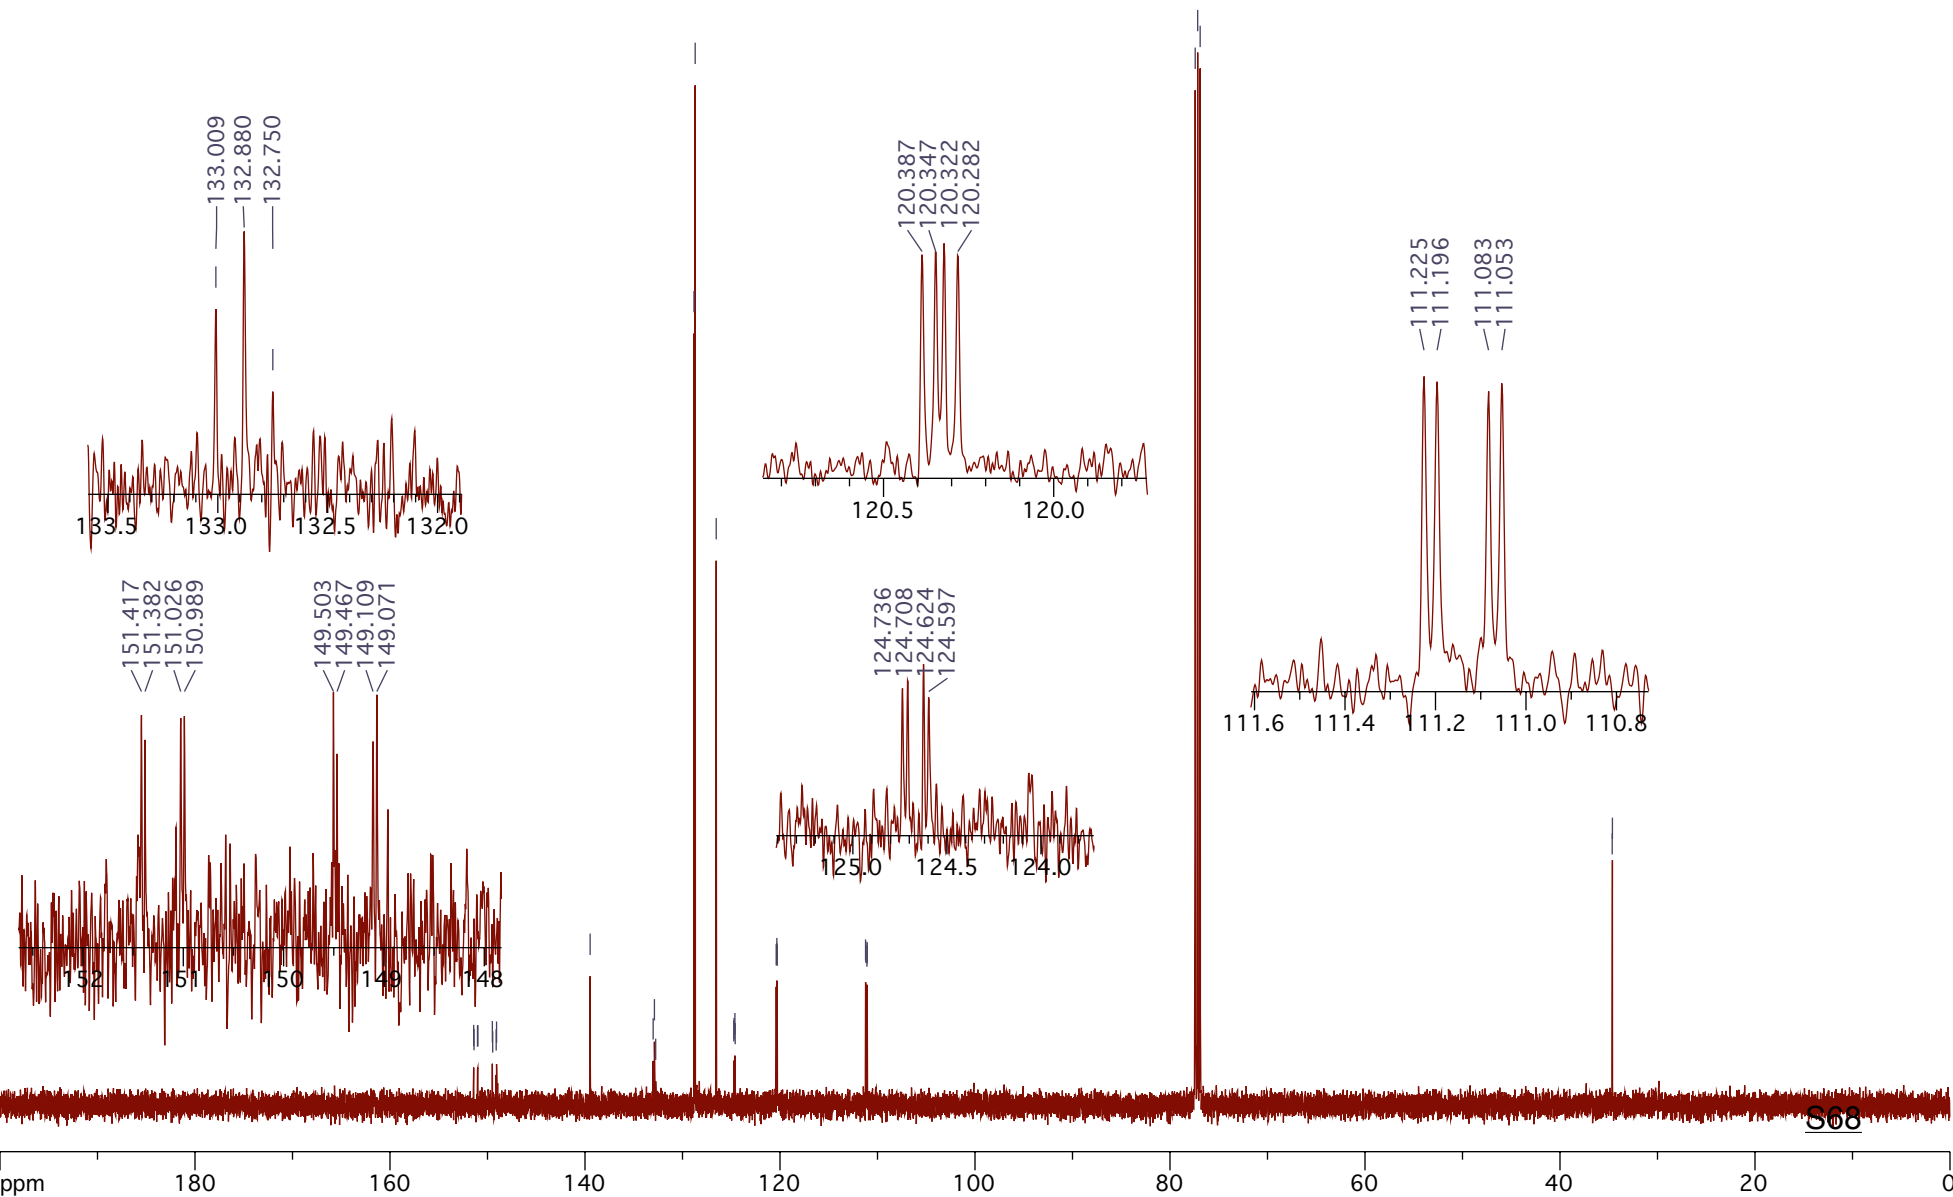

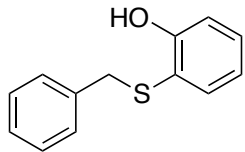

compound 34

7.305  
7.303  
7.290  
7.287  
7.281  
7.277  
7.272  
7.268  
7.263  
7.260  
7.122  
7.115  
7.107  
7.103  
6.976  
6.959  
6.848  
6.846  
6.833  
6.818  
6.816  
6.562

3.873

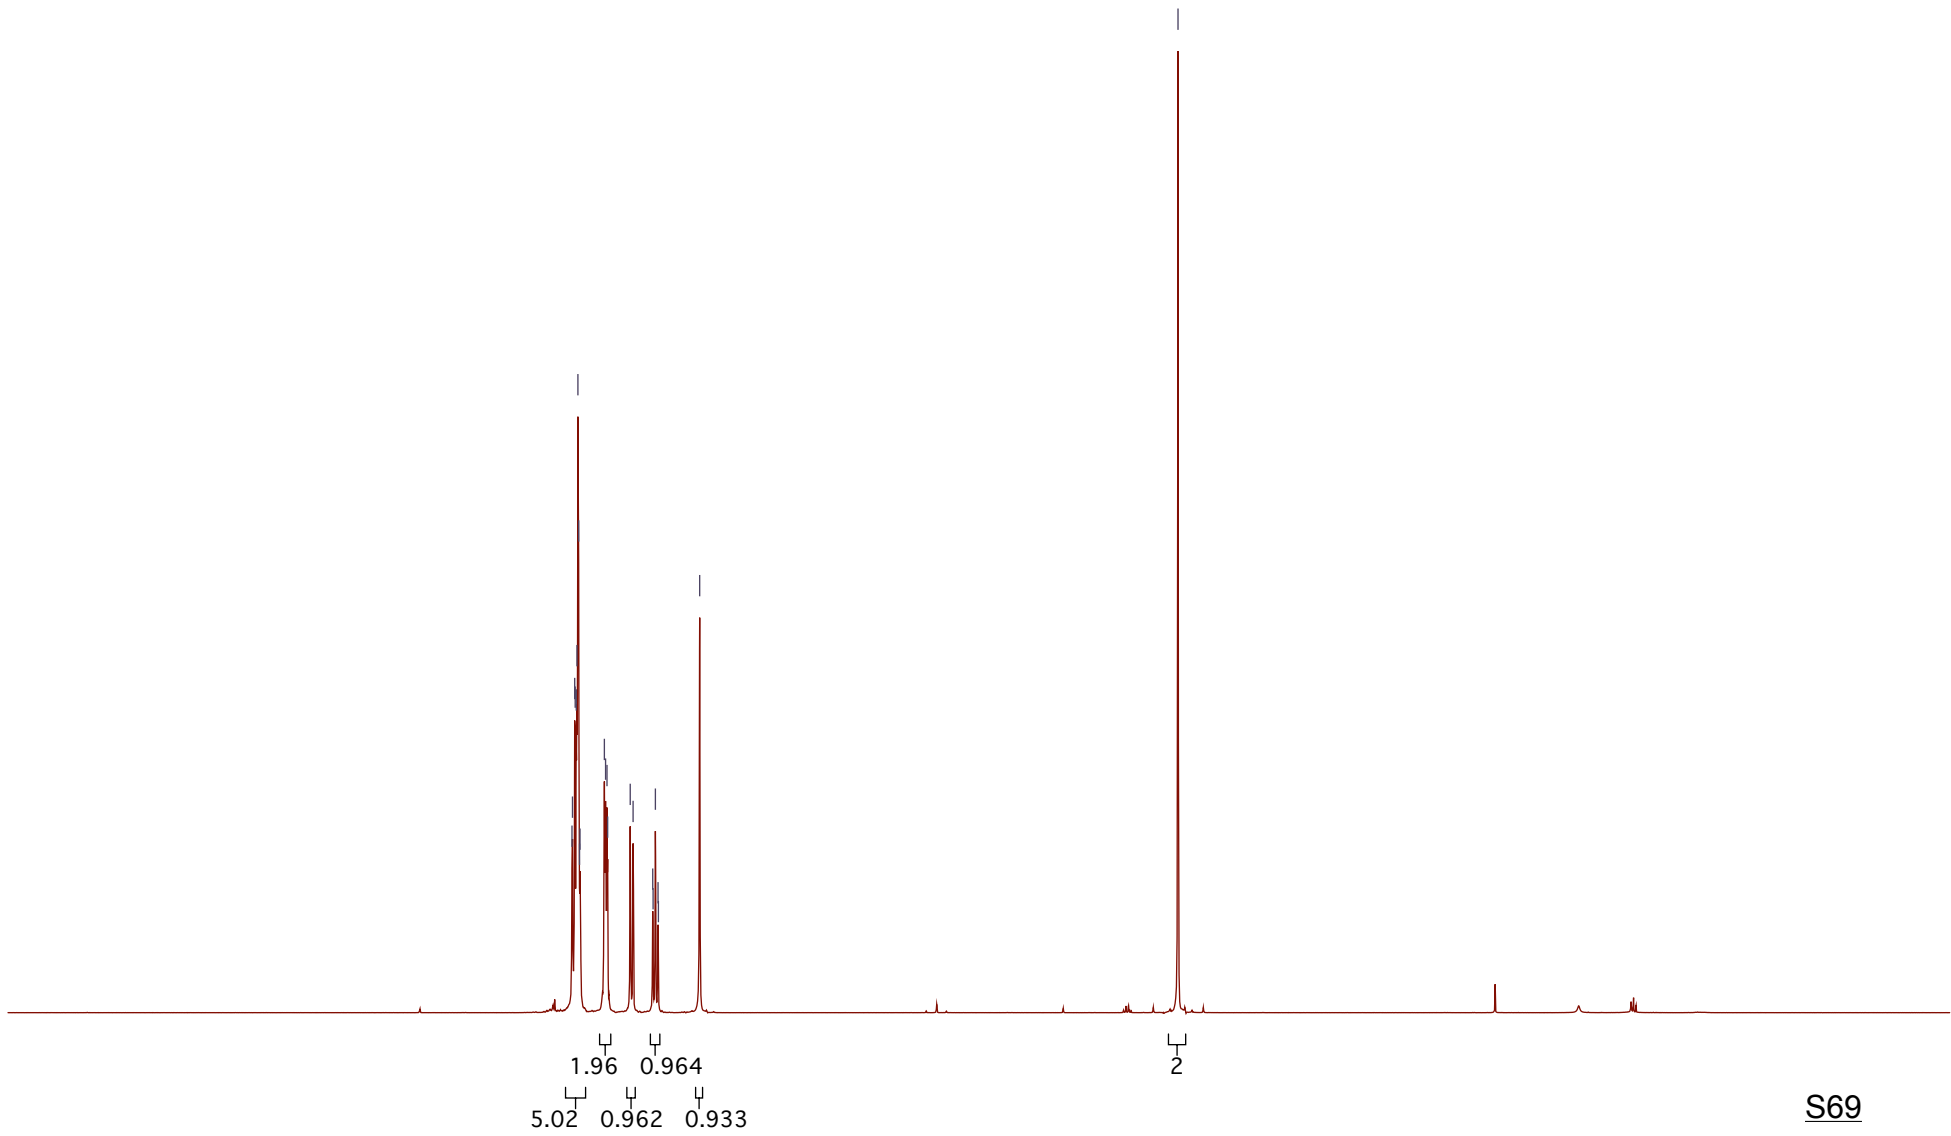

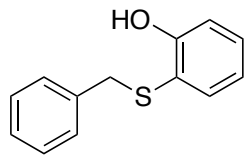

compound 34

157.238

137.682

136.500

131.487

128.881

128.641

127.516

120.727

118.342

114.857

77.414

77.160

76.906

41.458

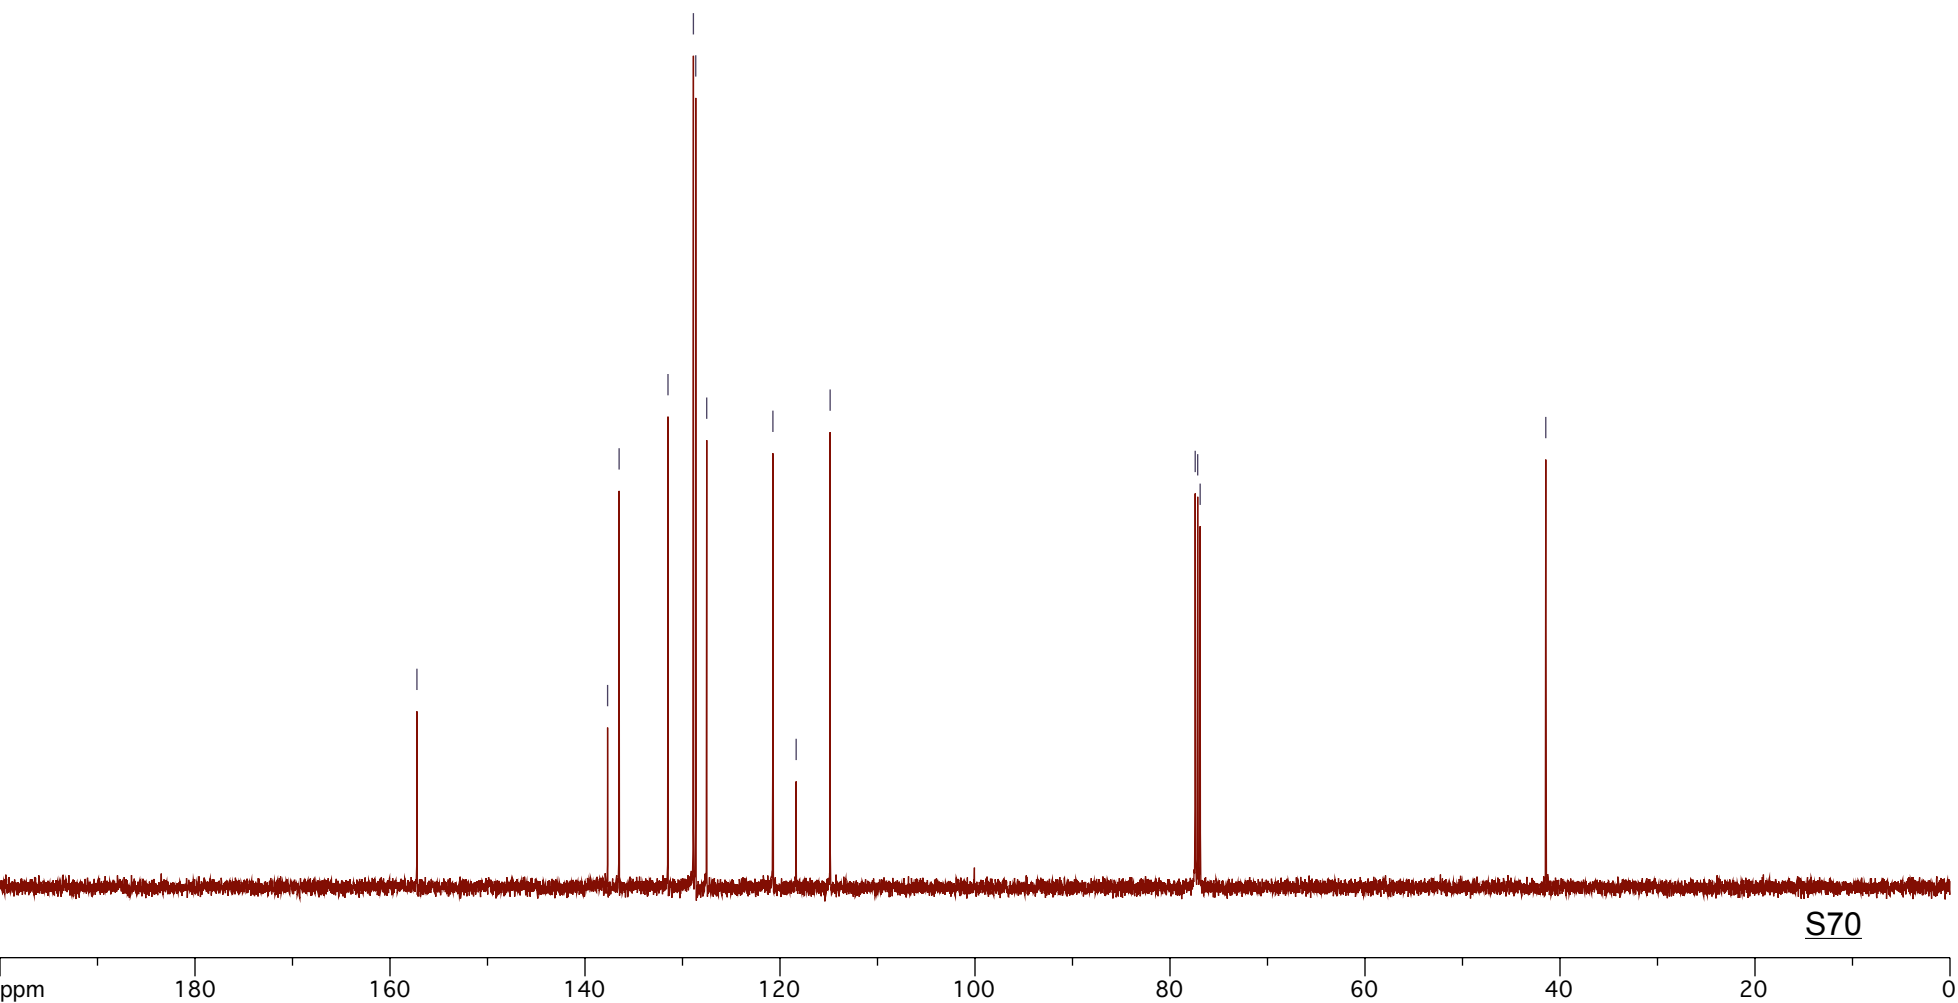

10.067

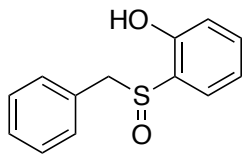

compound 35

7.333  
7.331  
7.318  
7.304  
7.289  
7.274  
7.260  
7.094  
7.080  
6.941  
6.927  
6.925  
6.900  
6.883  
6.849  
6.834  
6.819

4.375  
4.350  
4.280  
4.254

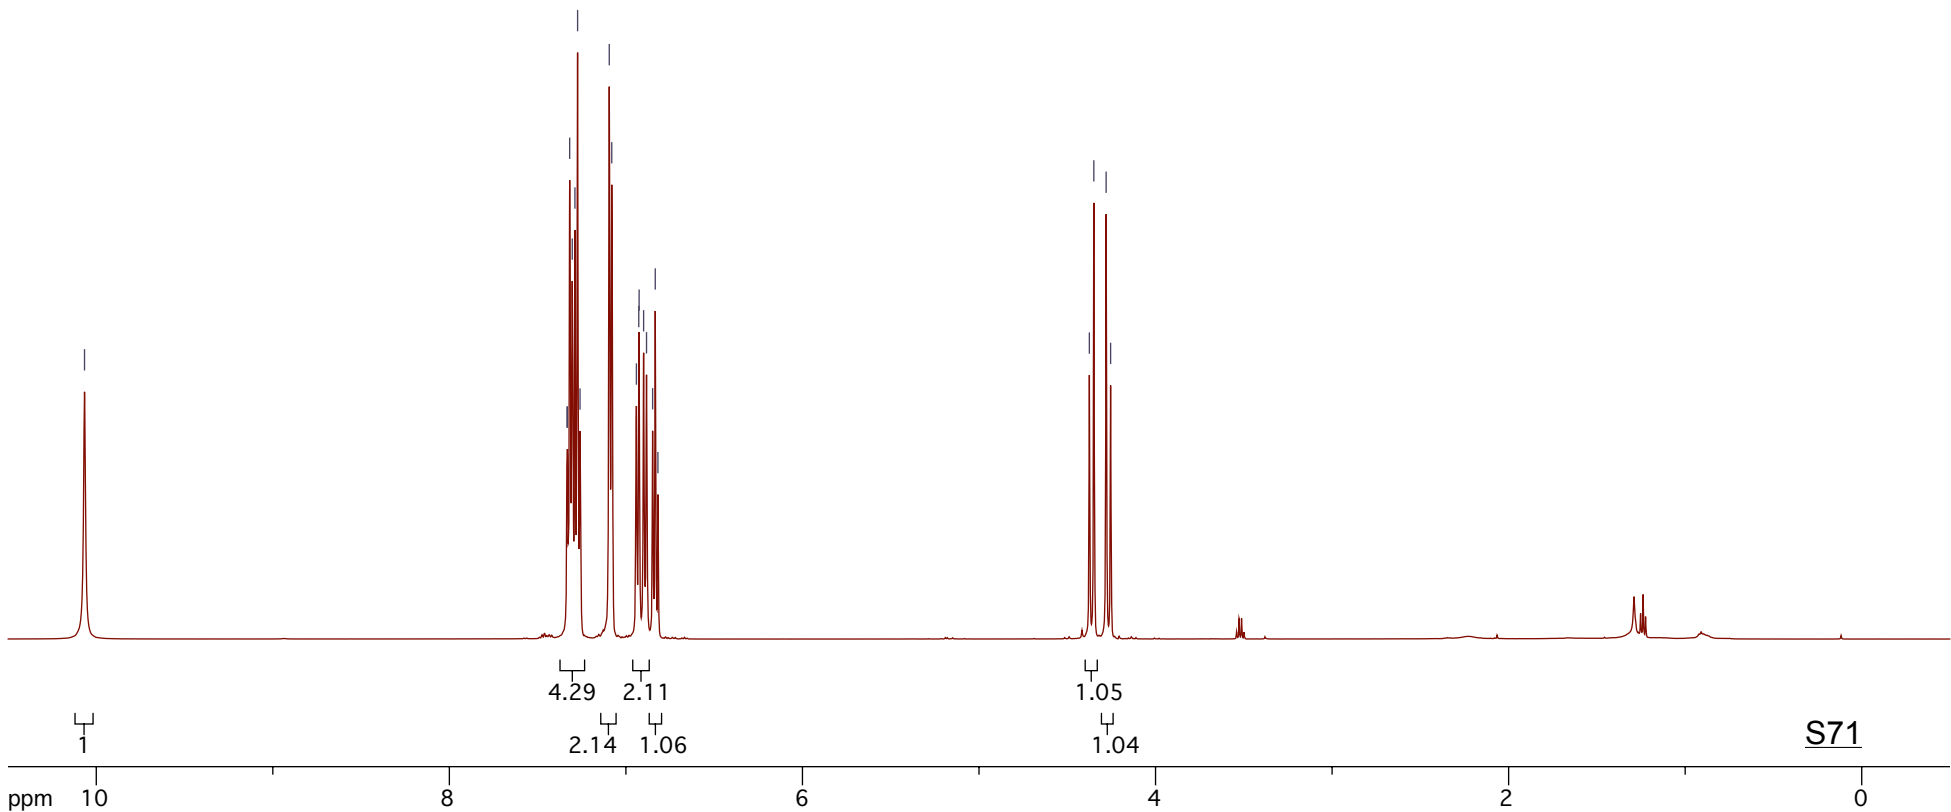

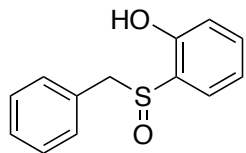

compound 35

158.200

132.922  
130.551  
129.019  
128.606  
128.593  
125.866  
122.037  
119.579  
118.249

77.415  
77.160  
76.906

60.501

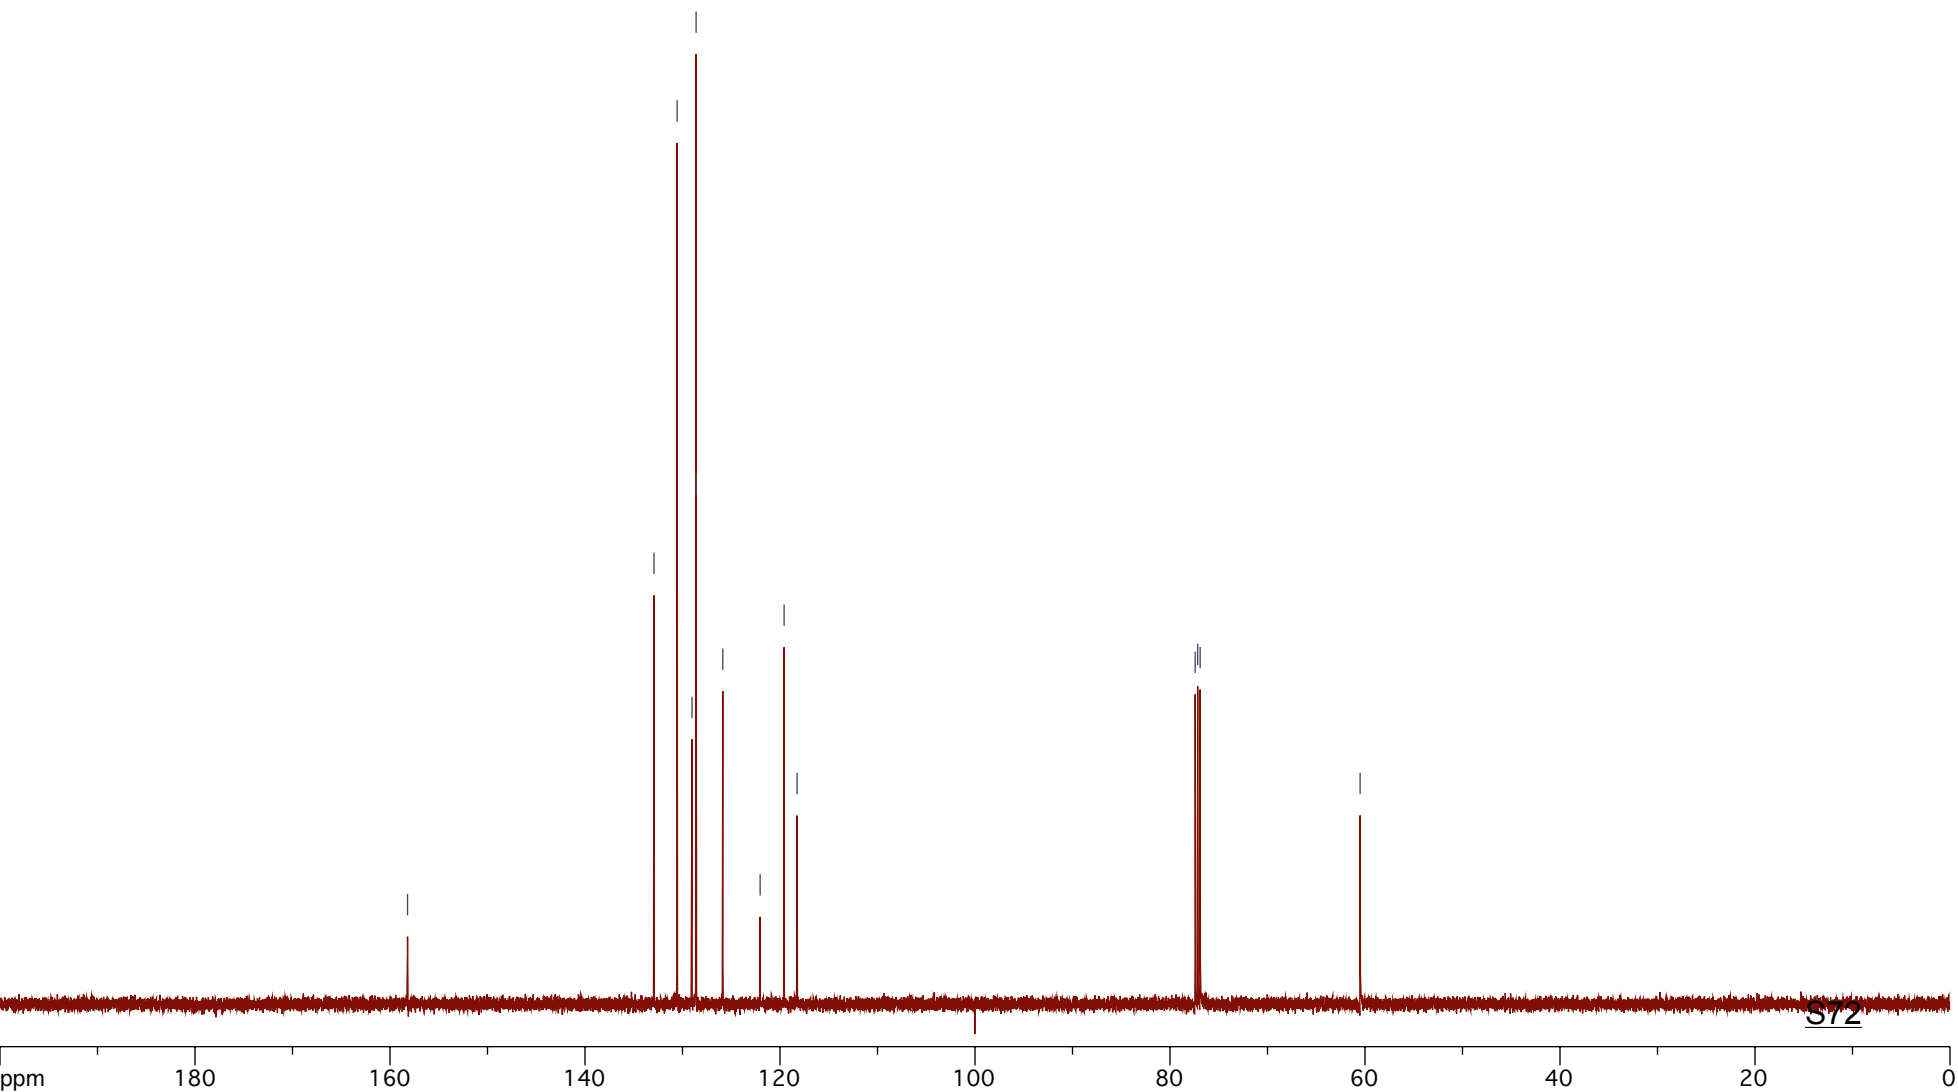



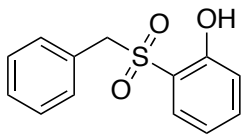

compound 36

8.633  
7.491  
7.488  
7.476  
7.474  
7.460  
7.457  
7.401  
7.398  
7.385  
7.382  
7.360  
7.345  
7.341  
7.330  
7.286  
7.271  
7.260  
7.256  
7.094  
7.079  
6.933  
6.931  
6.916  
6.912  
6.902  
6.901  
6.895

4.362

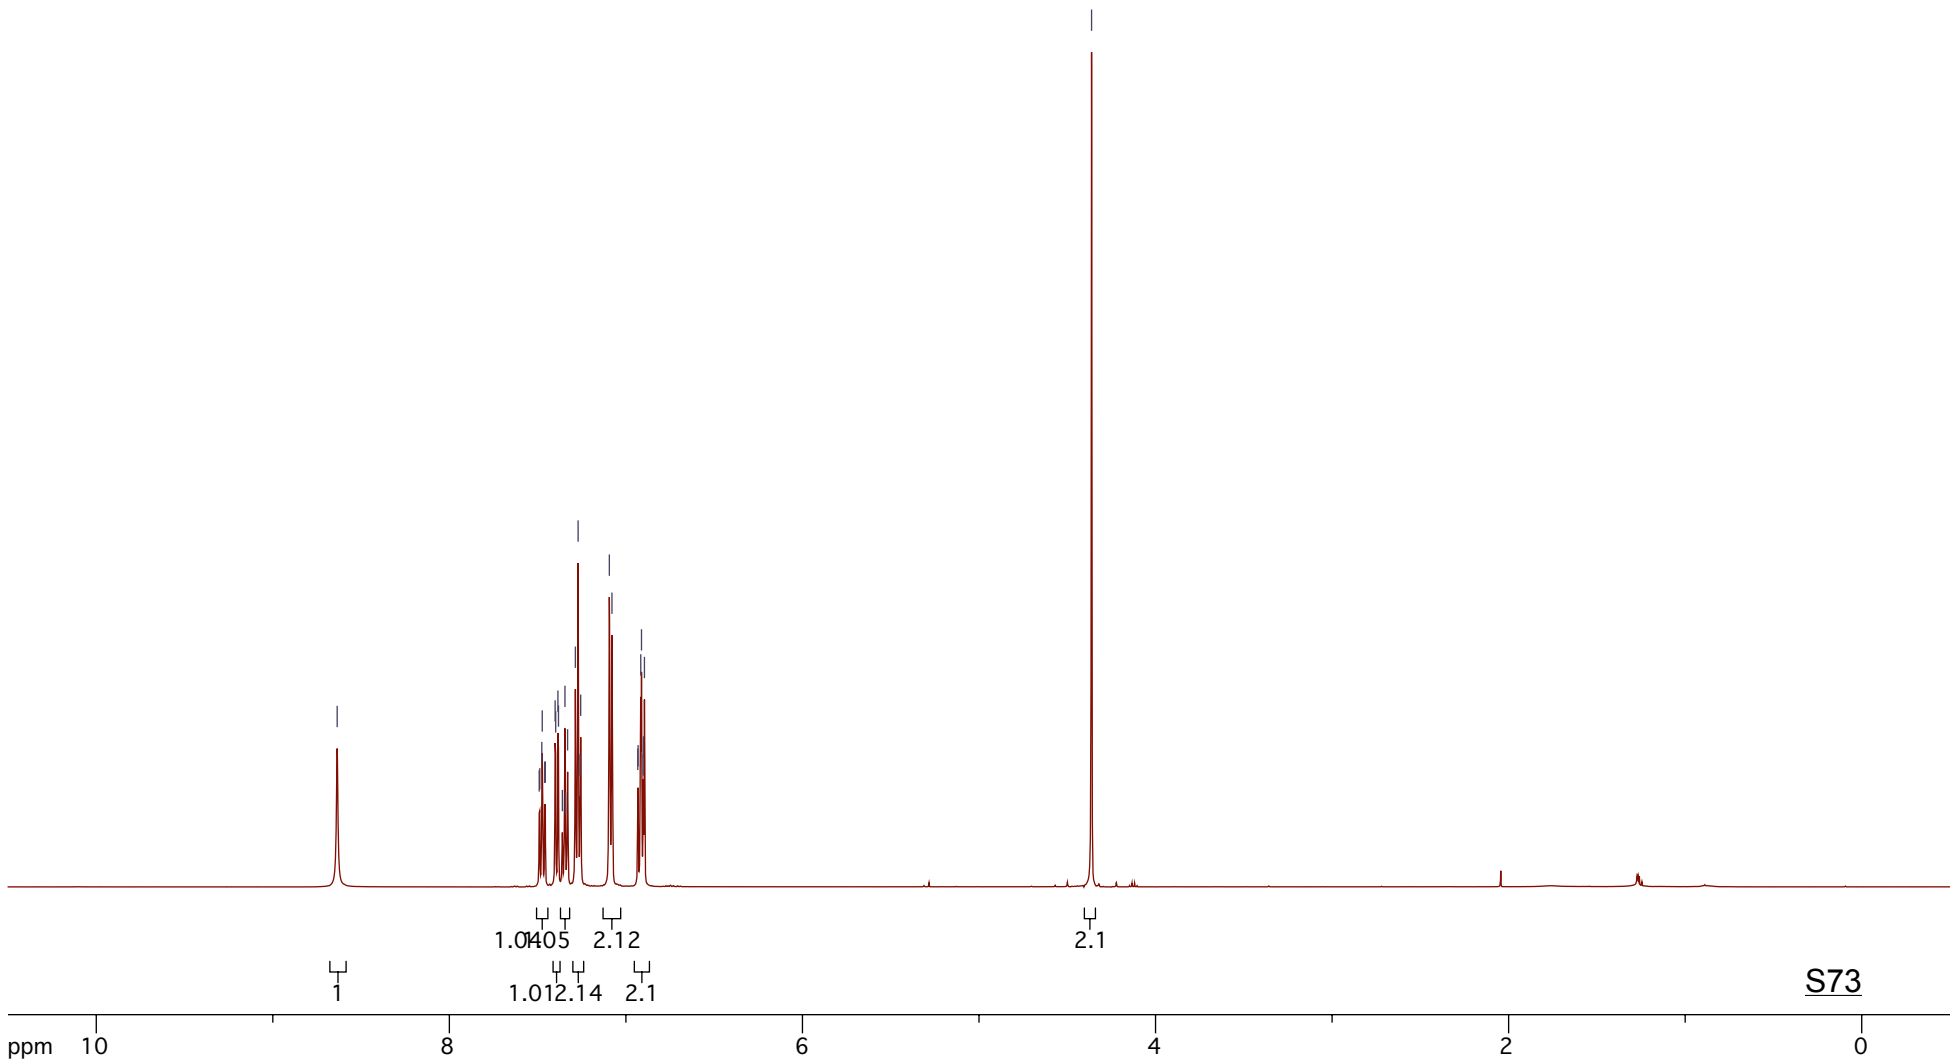

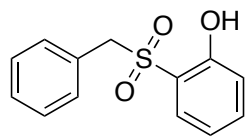

compound 36

156.835

136.725

130.913

129.749

129.238

128.789

127.213

120.325

119.878

118.641

77.414

77.160

76.905

63.352

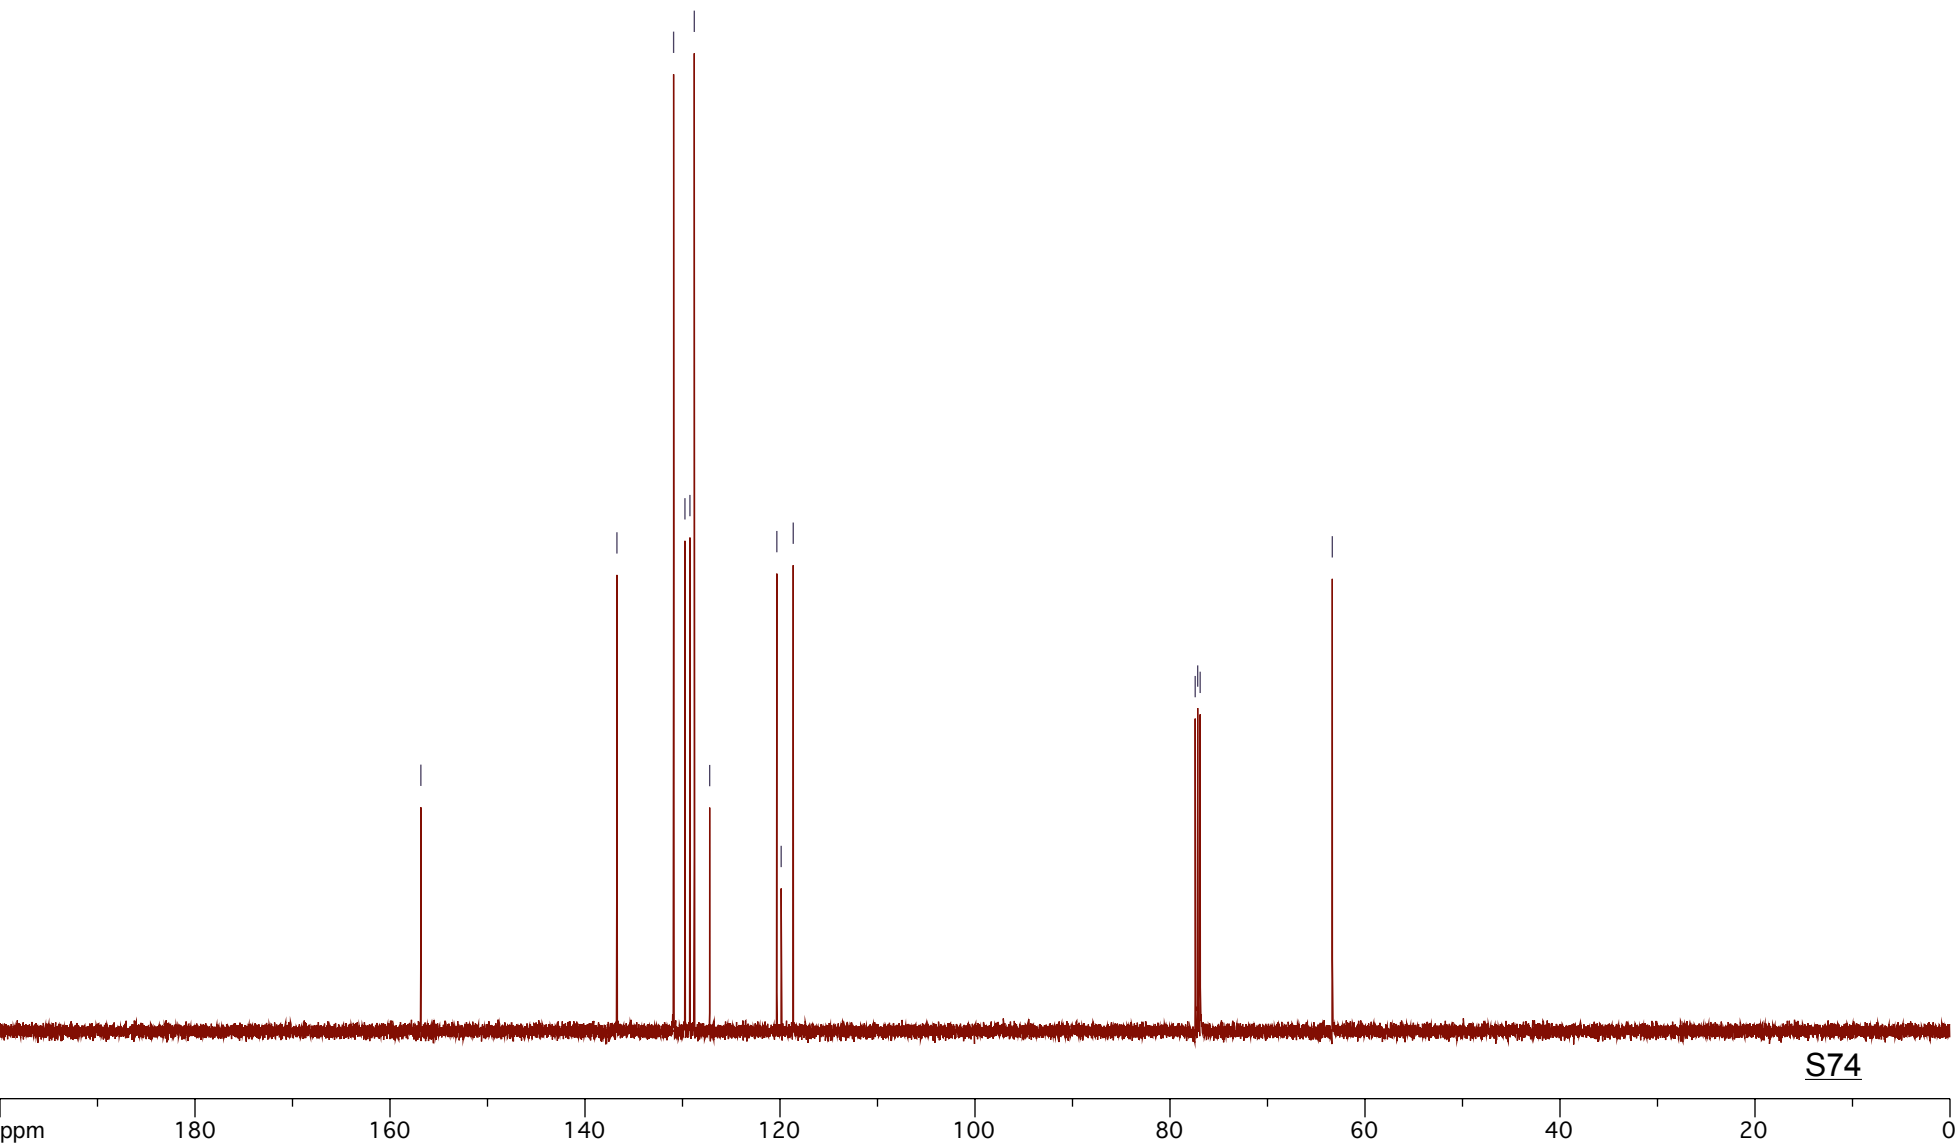

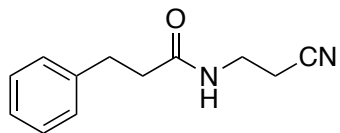

compound 42

7.341  
7.326  
7.311  
7.260  
7.245  
7.234  
7.220  
6.518

3.482  
3.469  
3.457  
3.444  
3.011  
2.996  
2.981  
2.576  
2.564  
2.550  
2.534

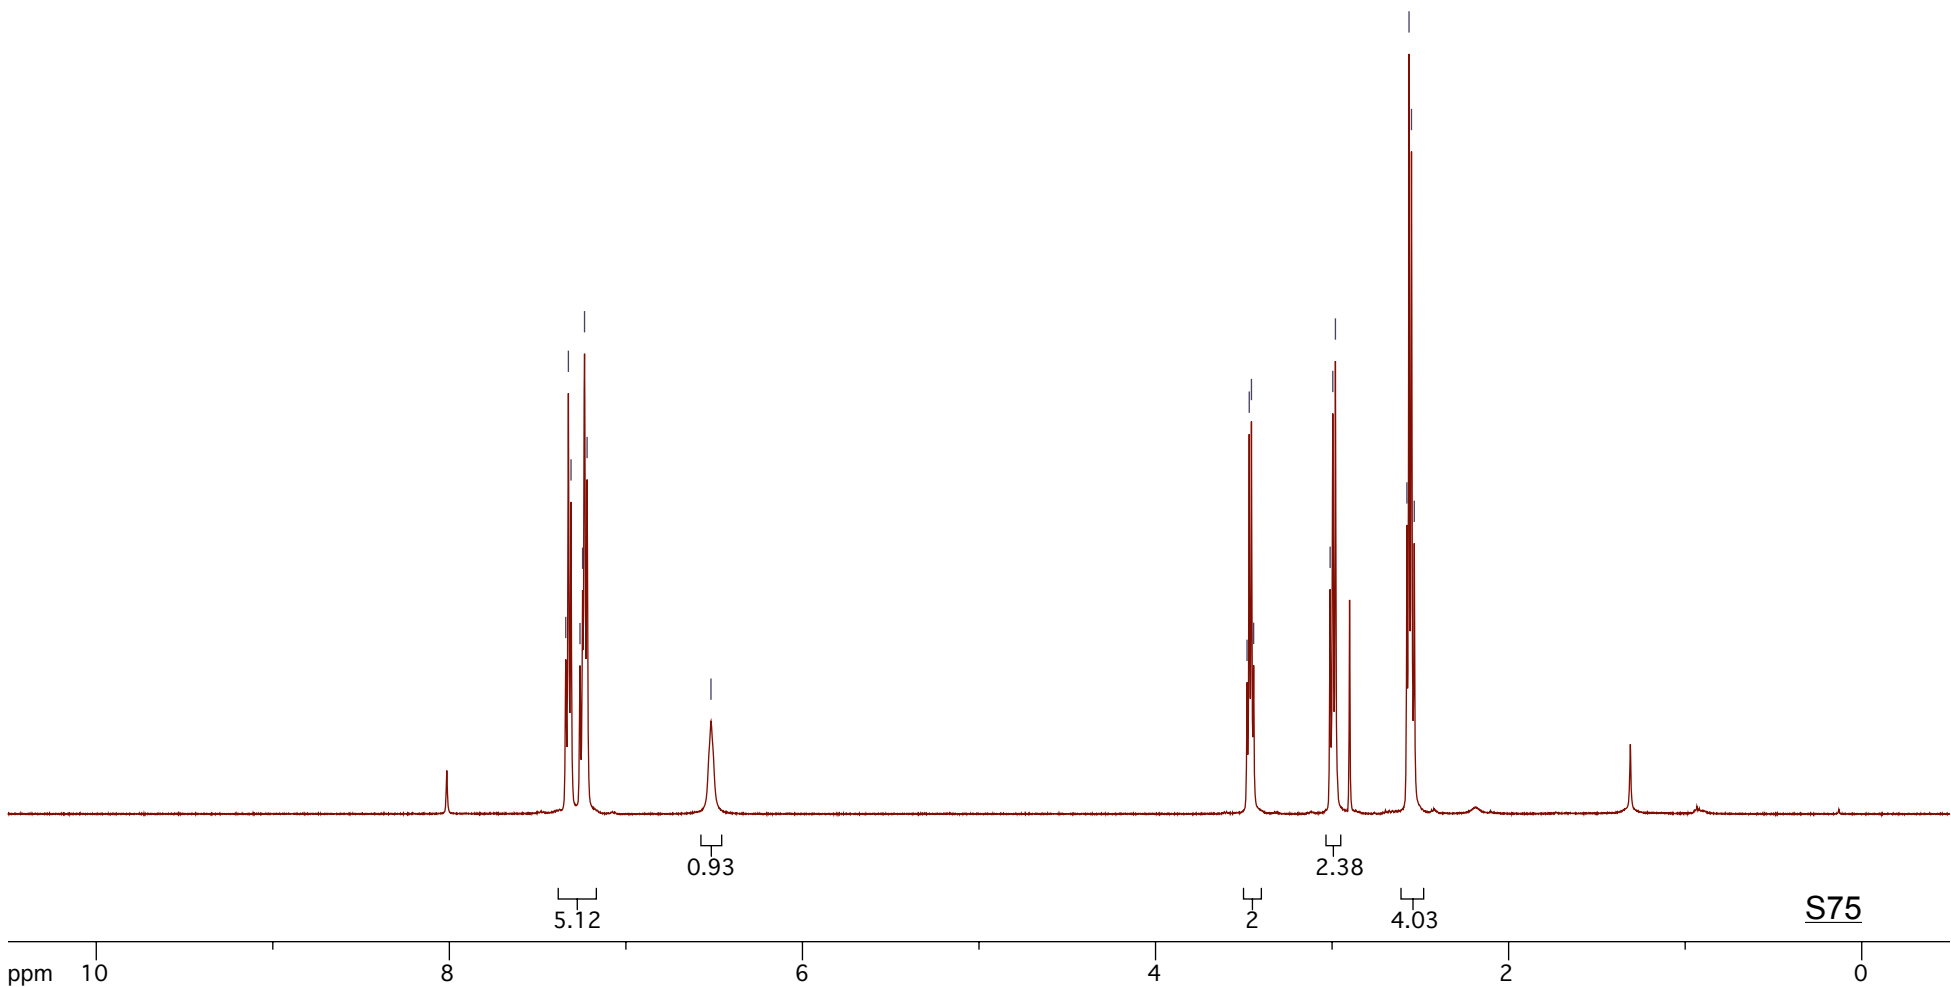

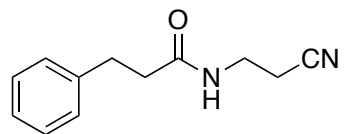

compound 42

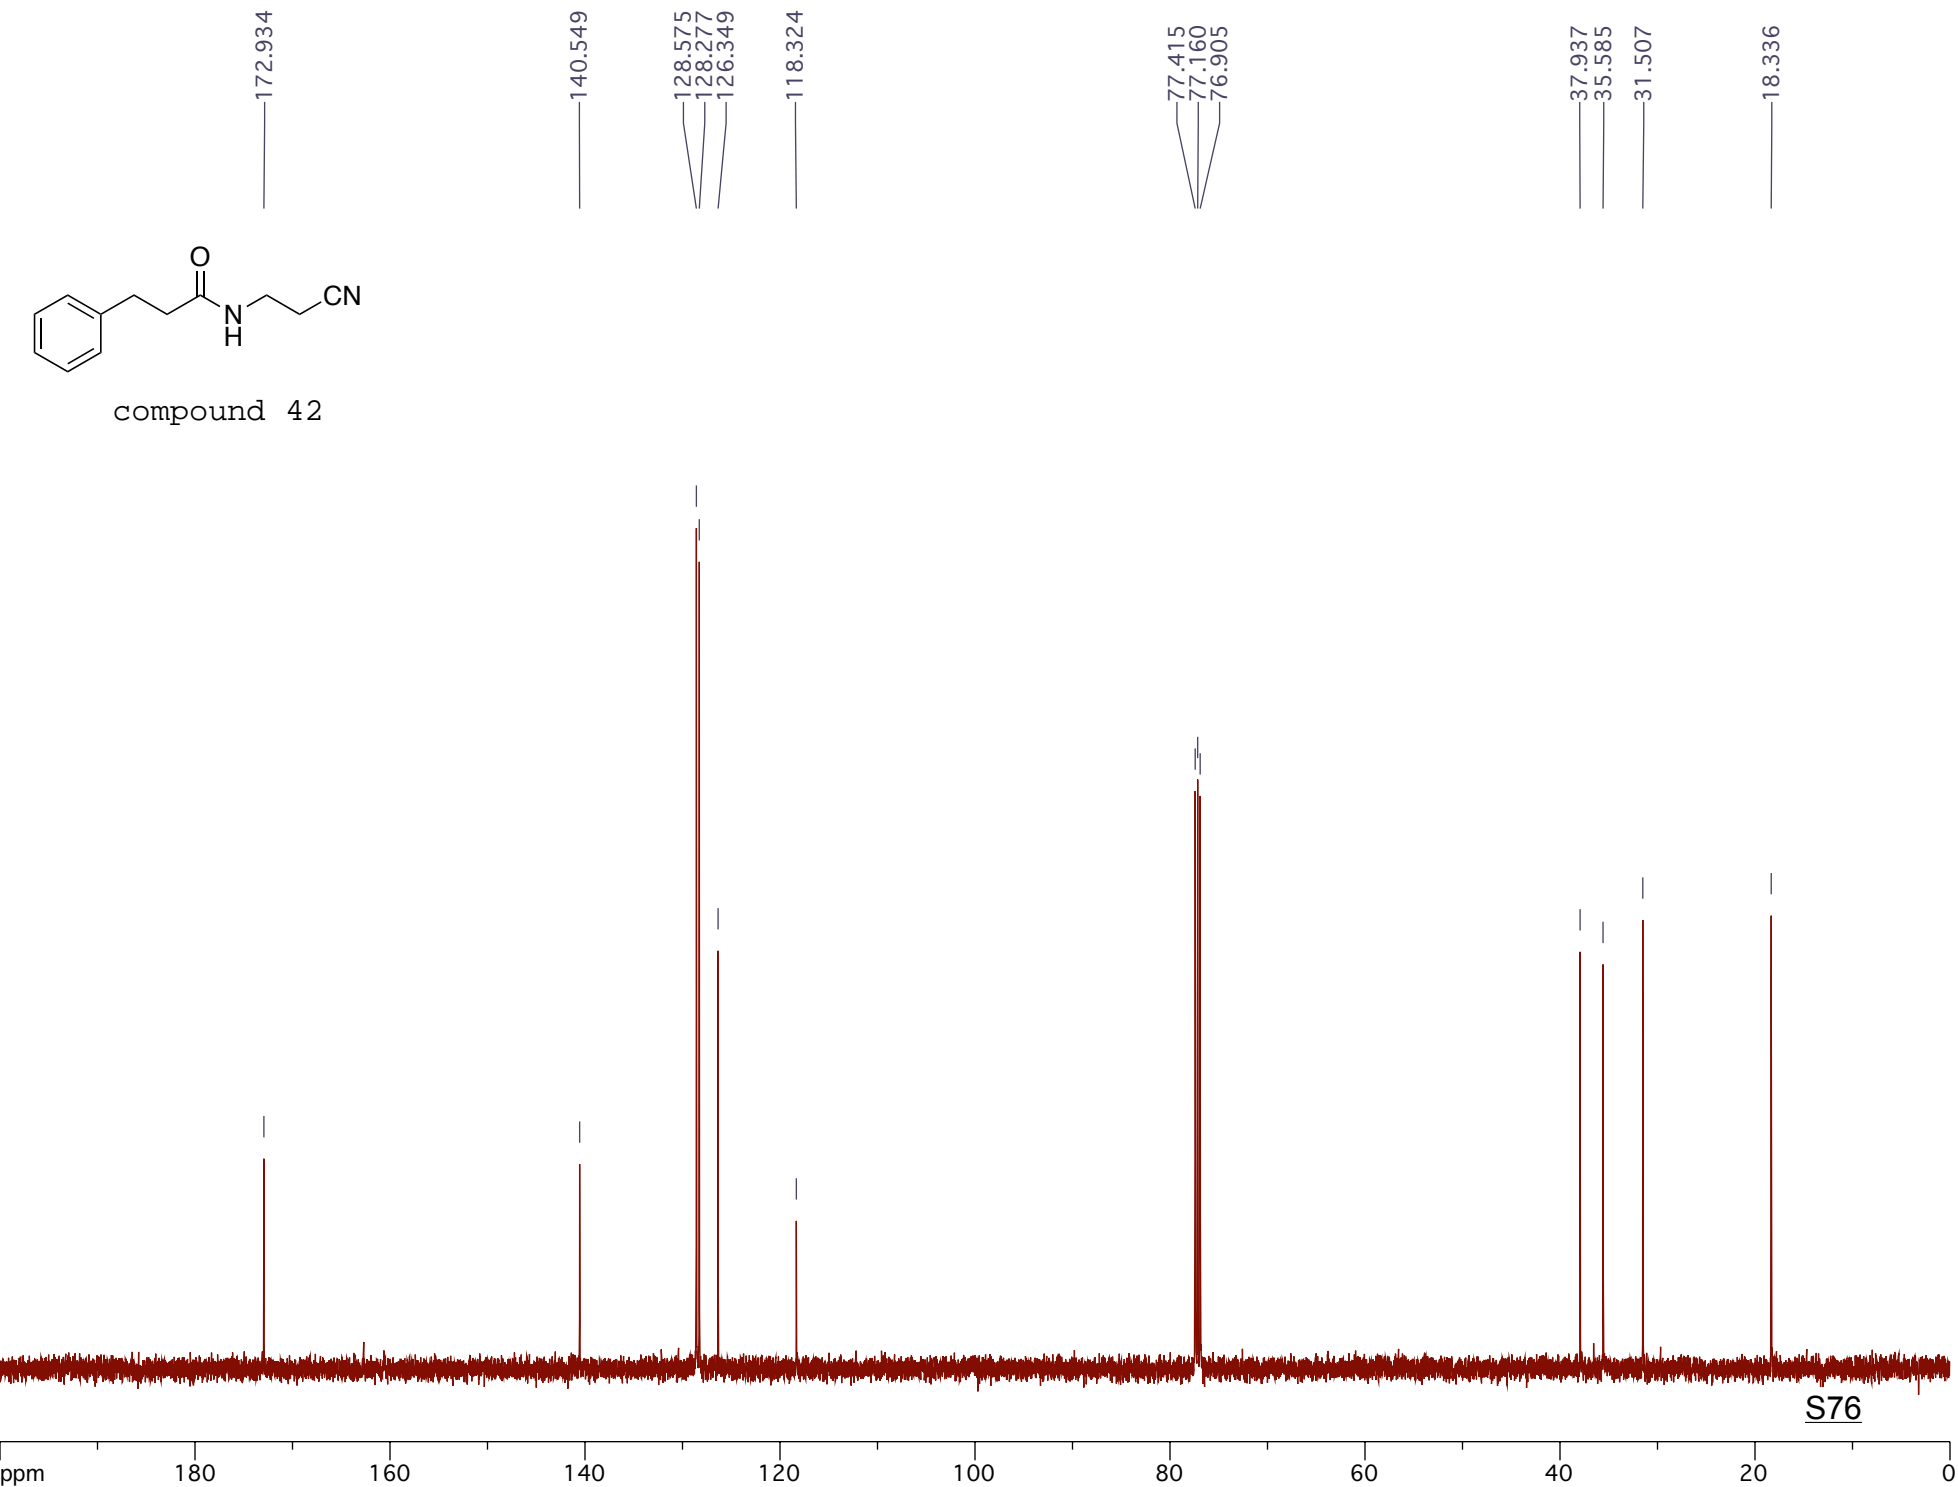

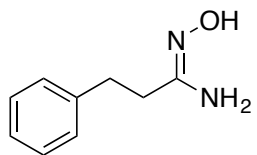

compound 43

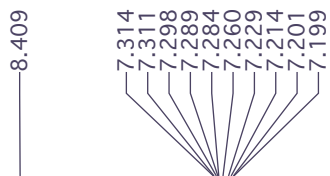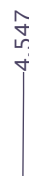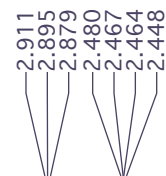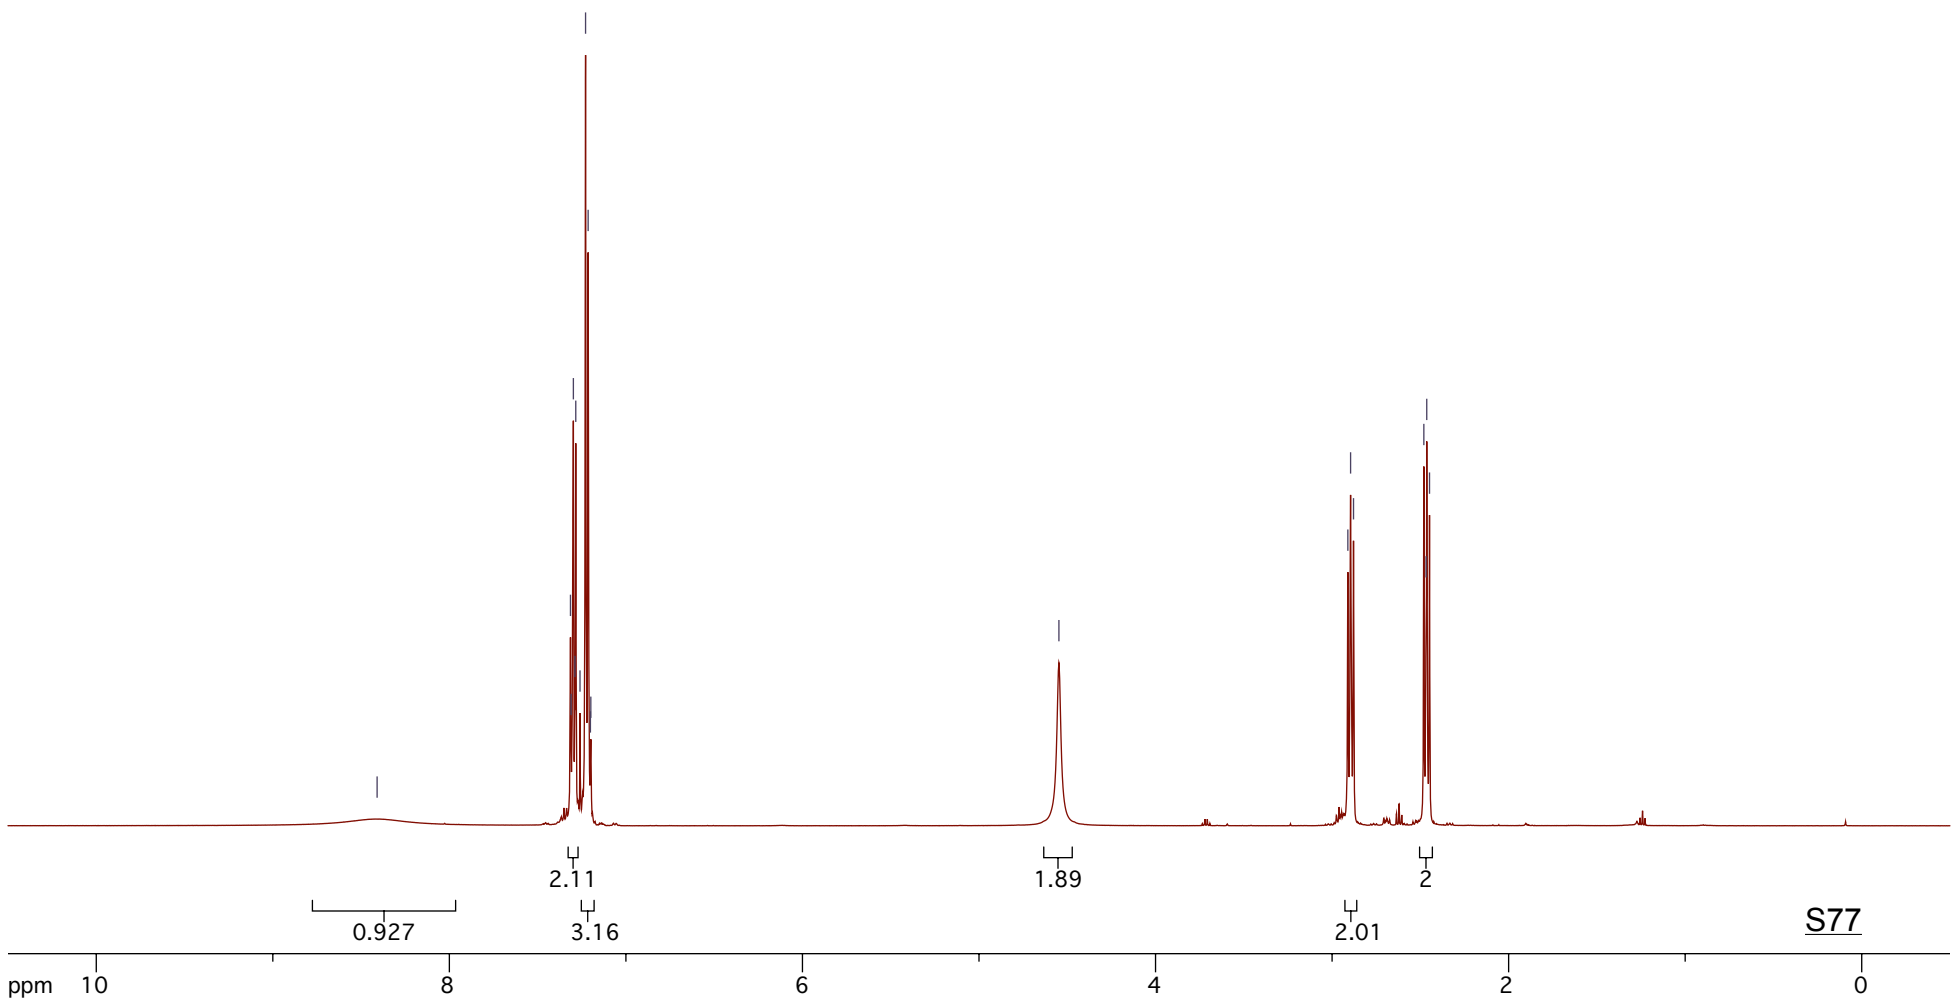

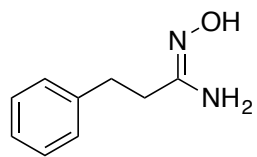

compound 43

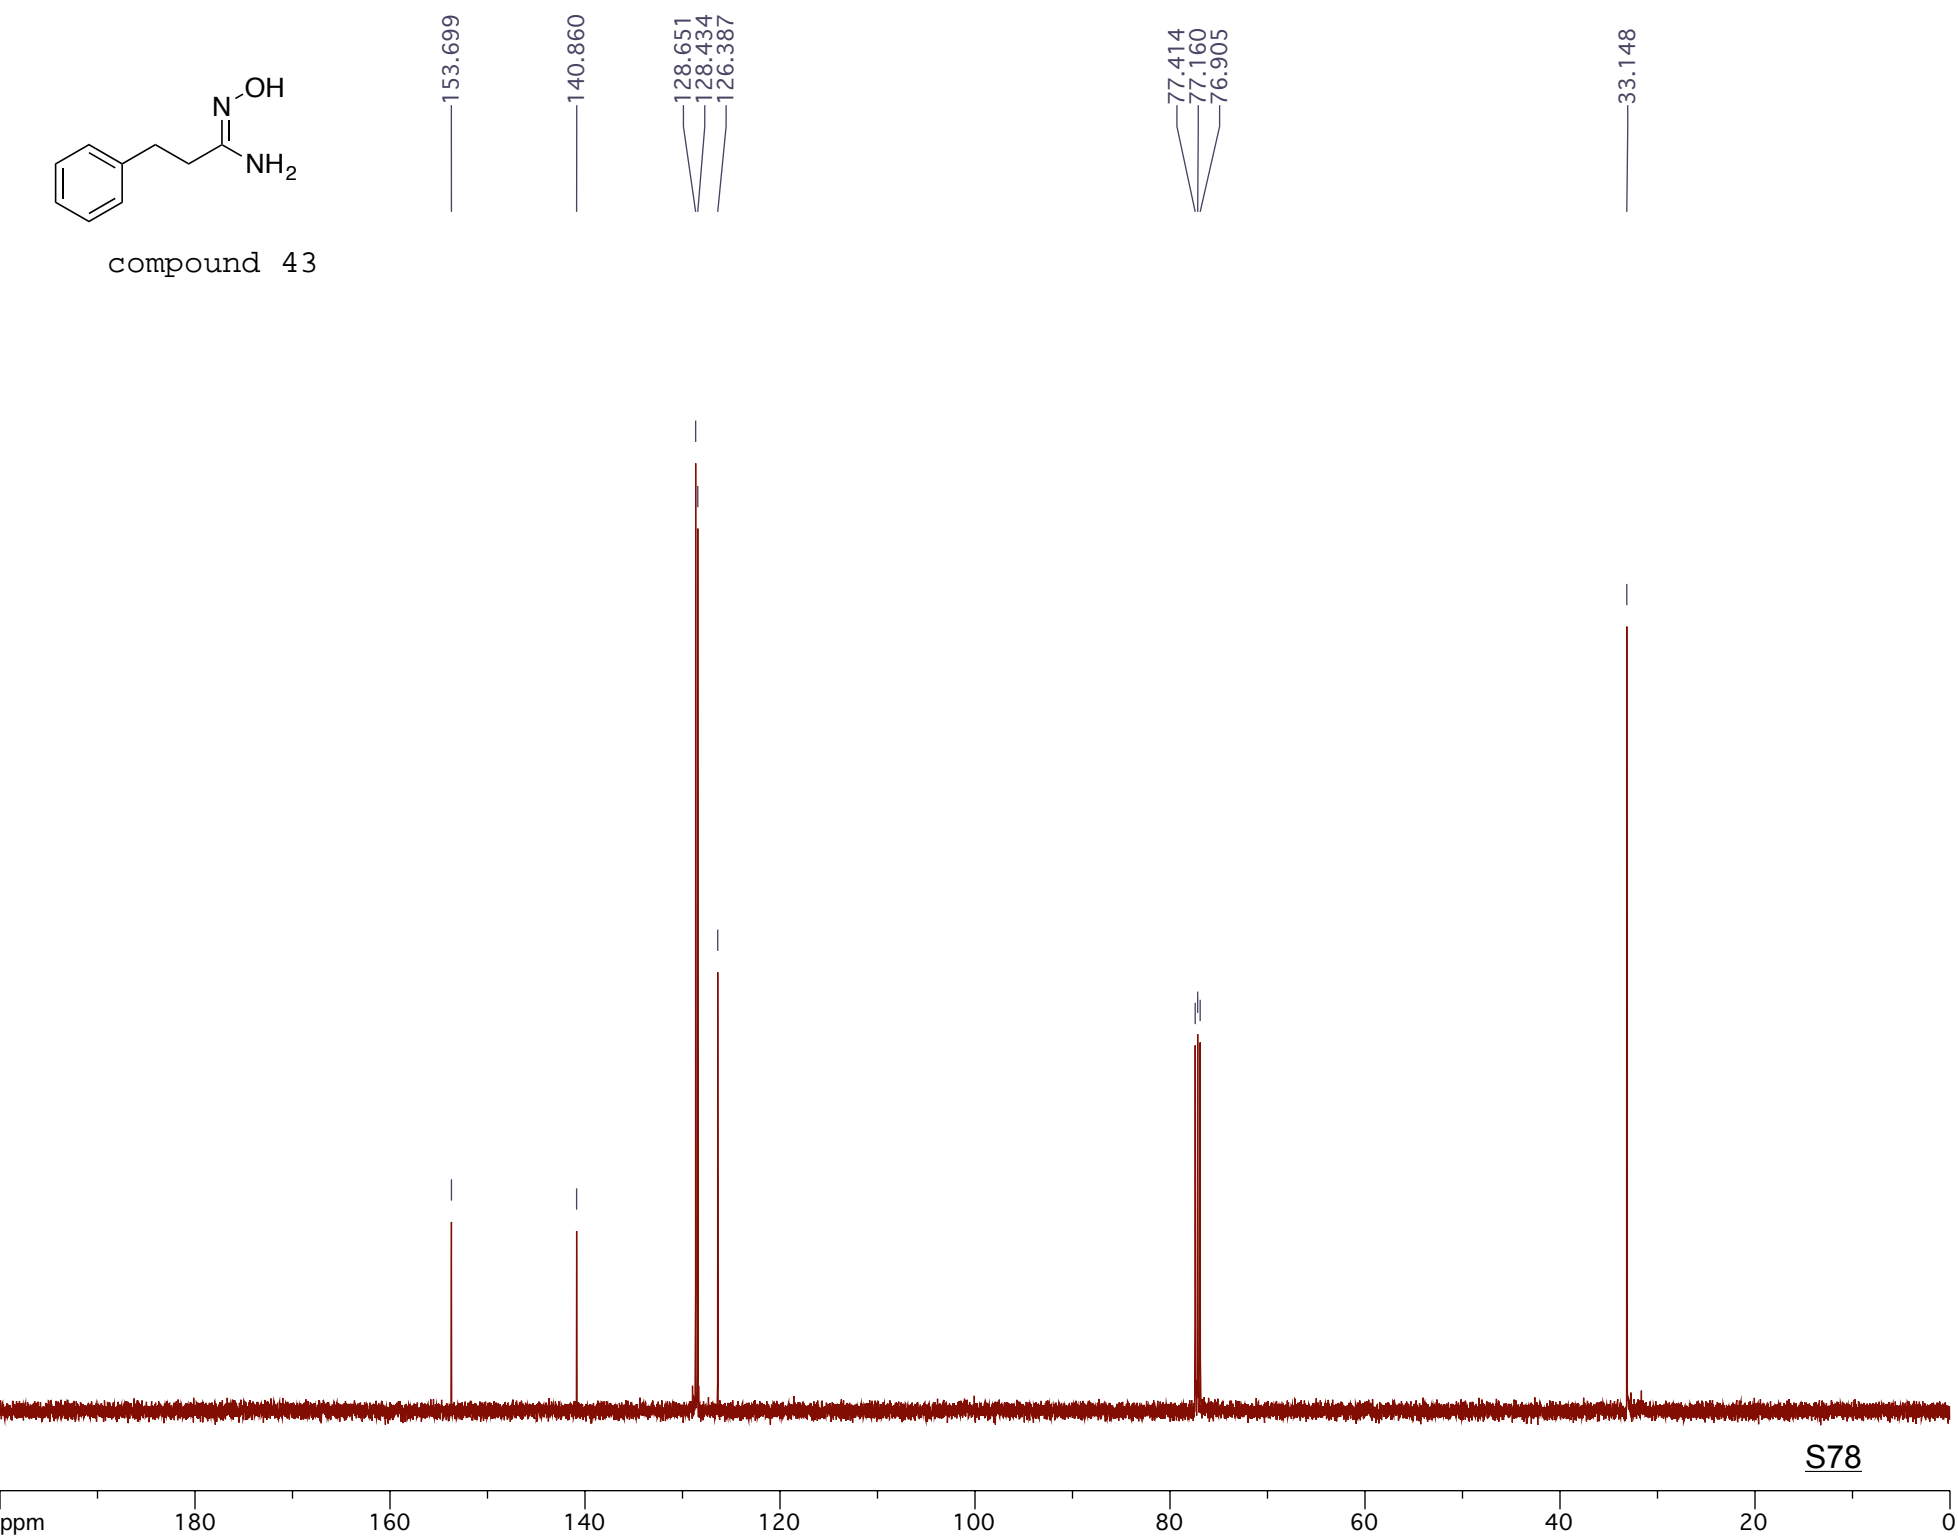

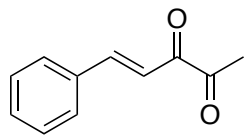

compound 47

7.833  
7.800  
7.621  
7.619  
7.607  
7.603  
7.442  
7.423  
7.421  
7.416  
7.412  
7.410  
7.398  
7.392  
7.380  
7.375

2.434

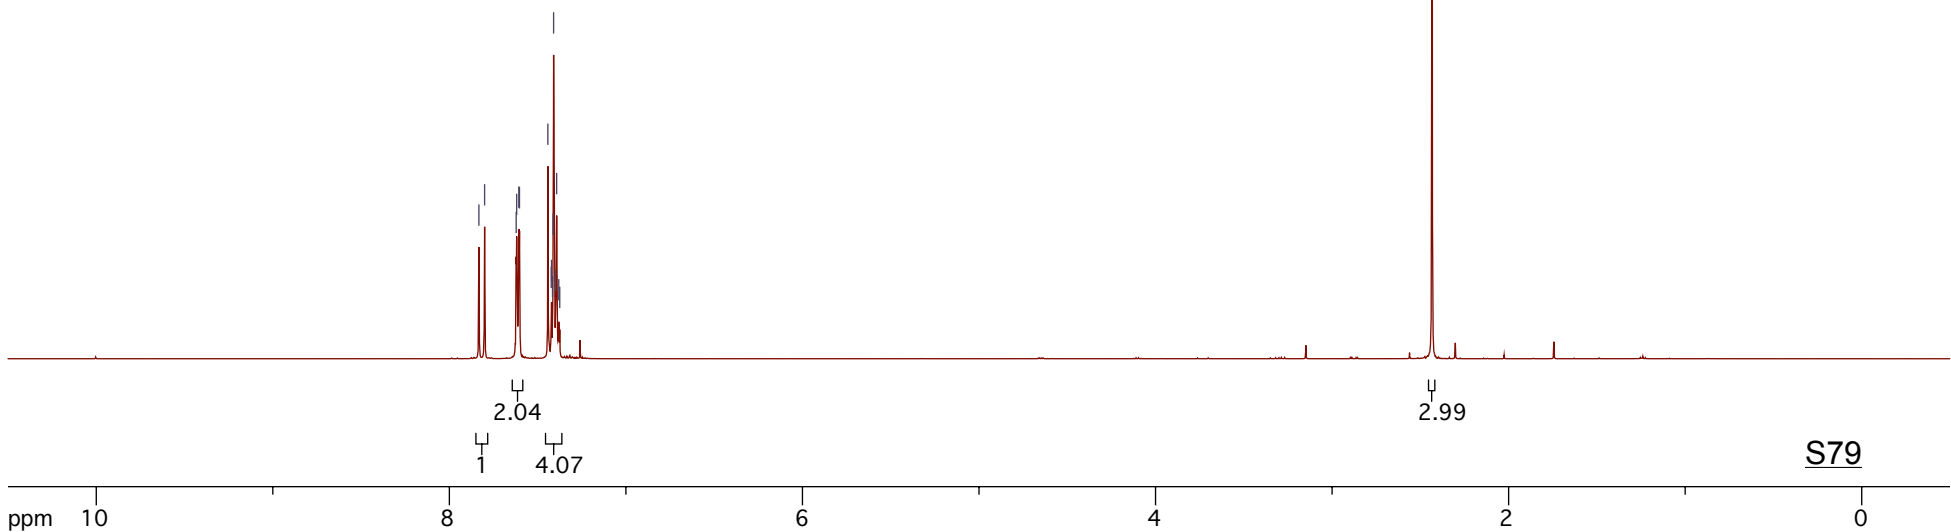

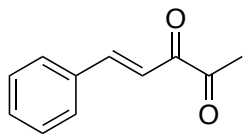

compound 47

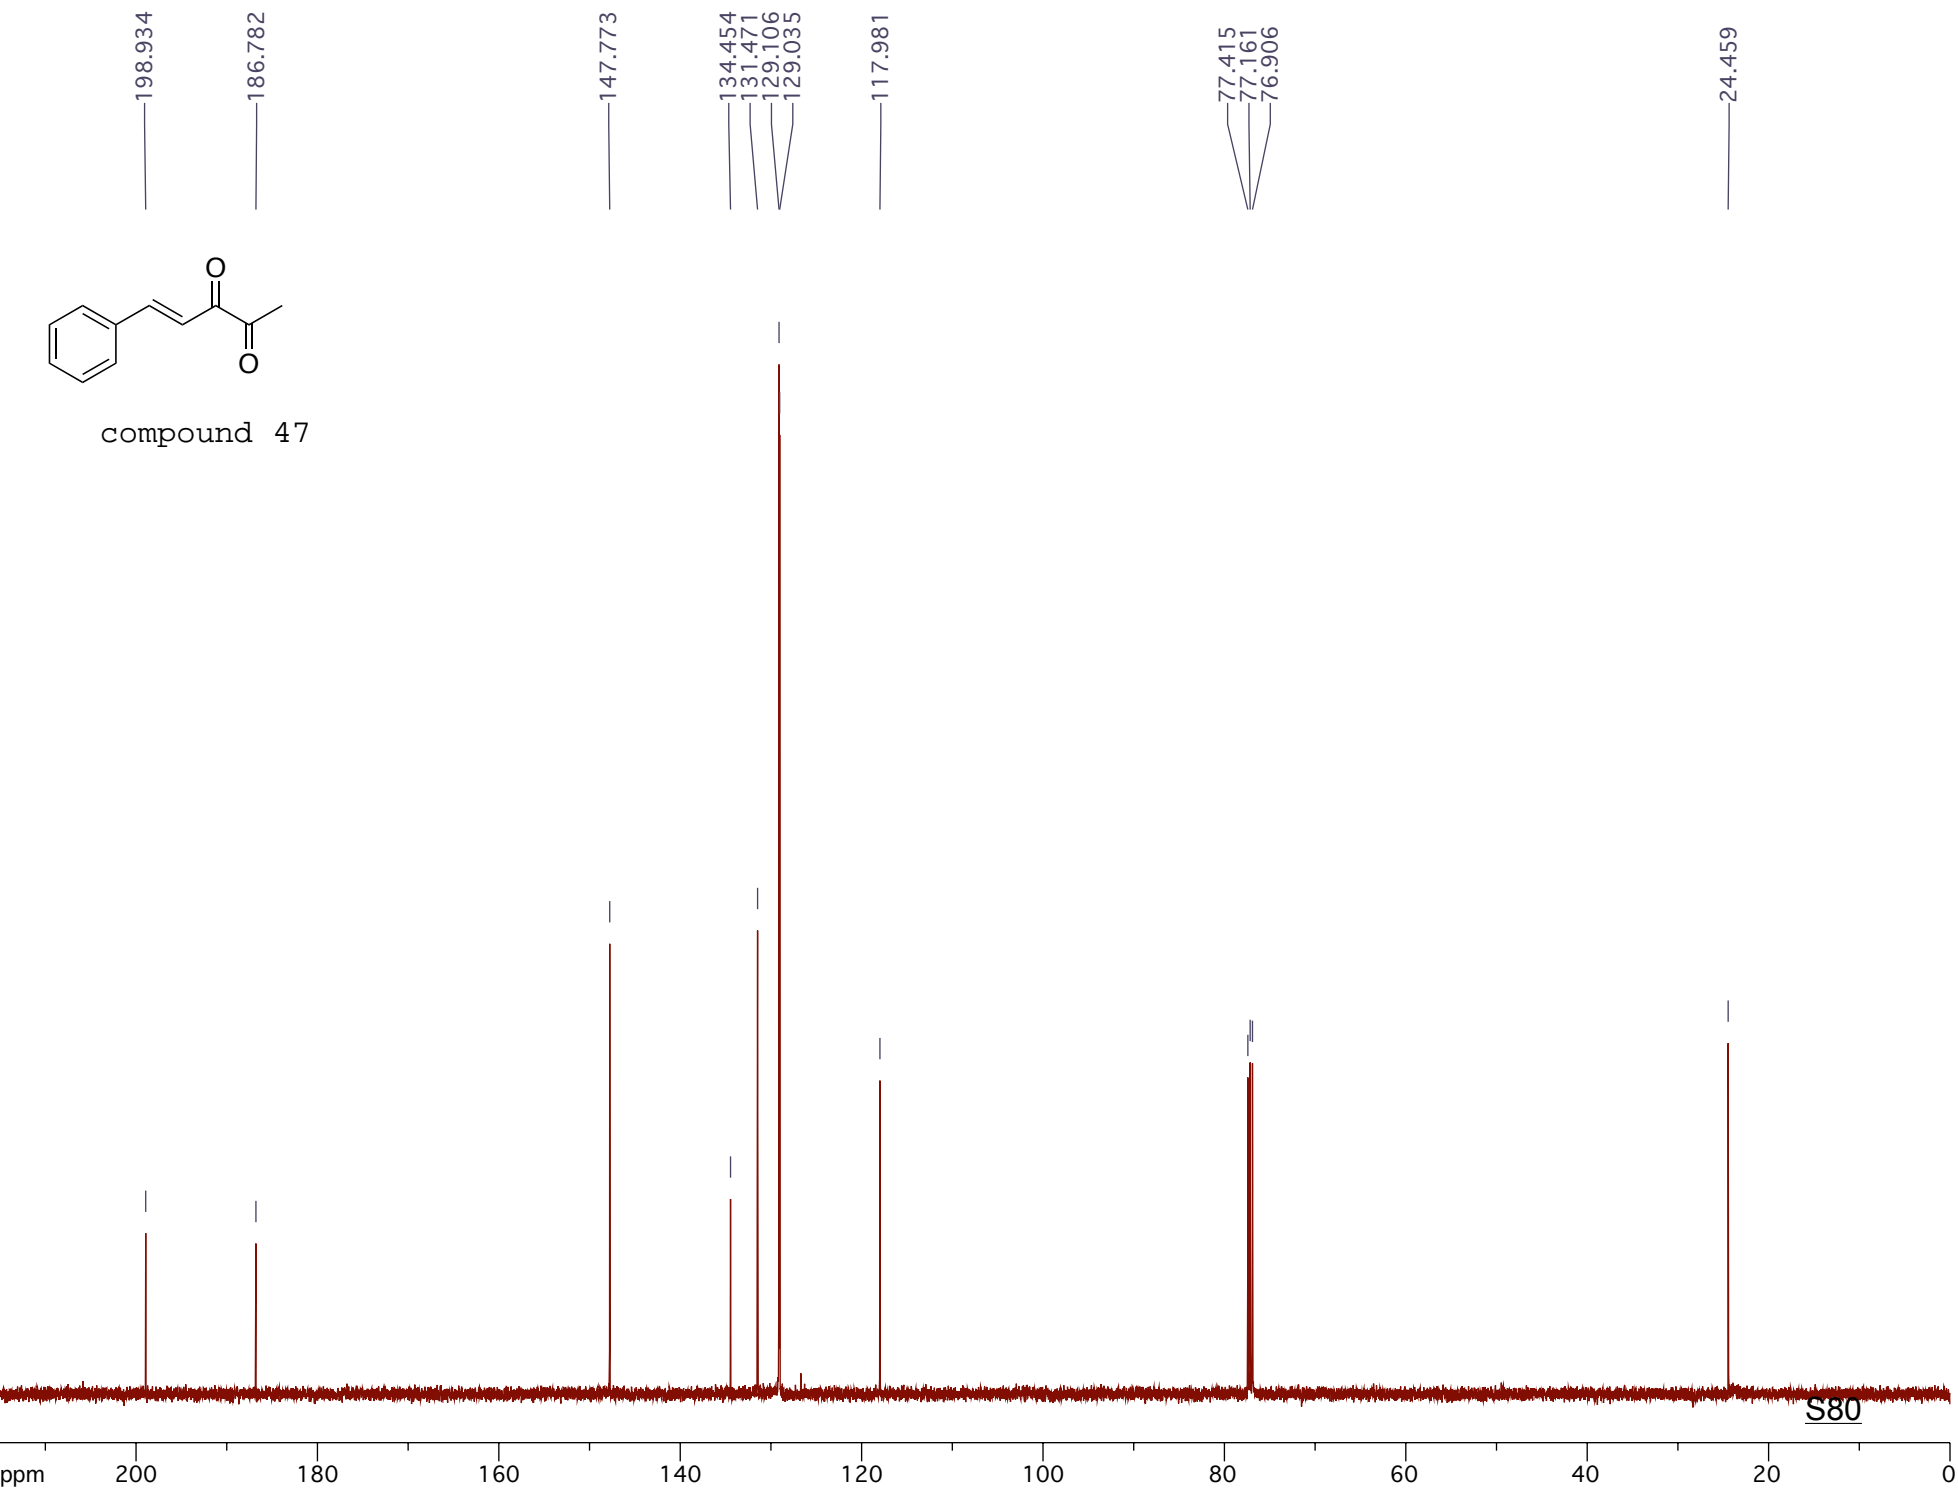



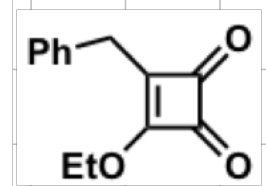

compound 48

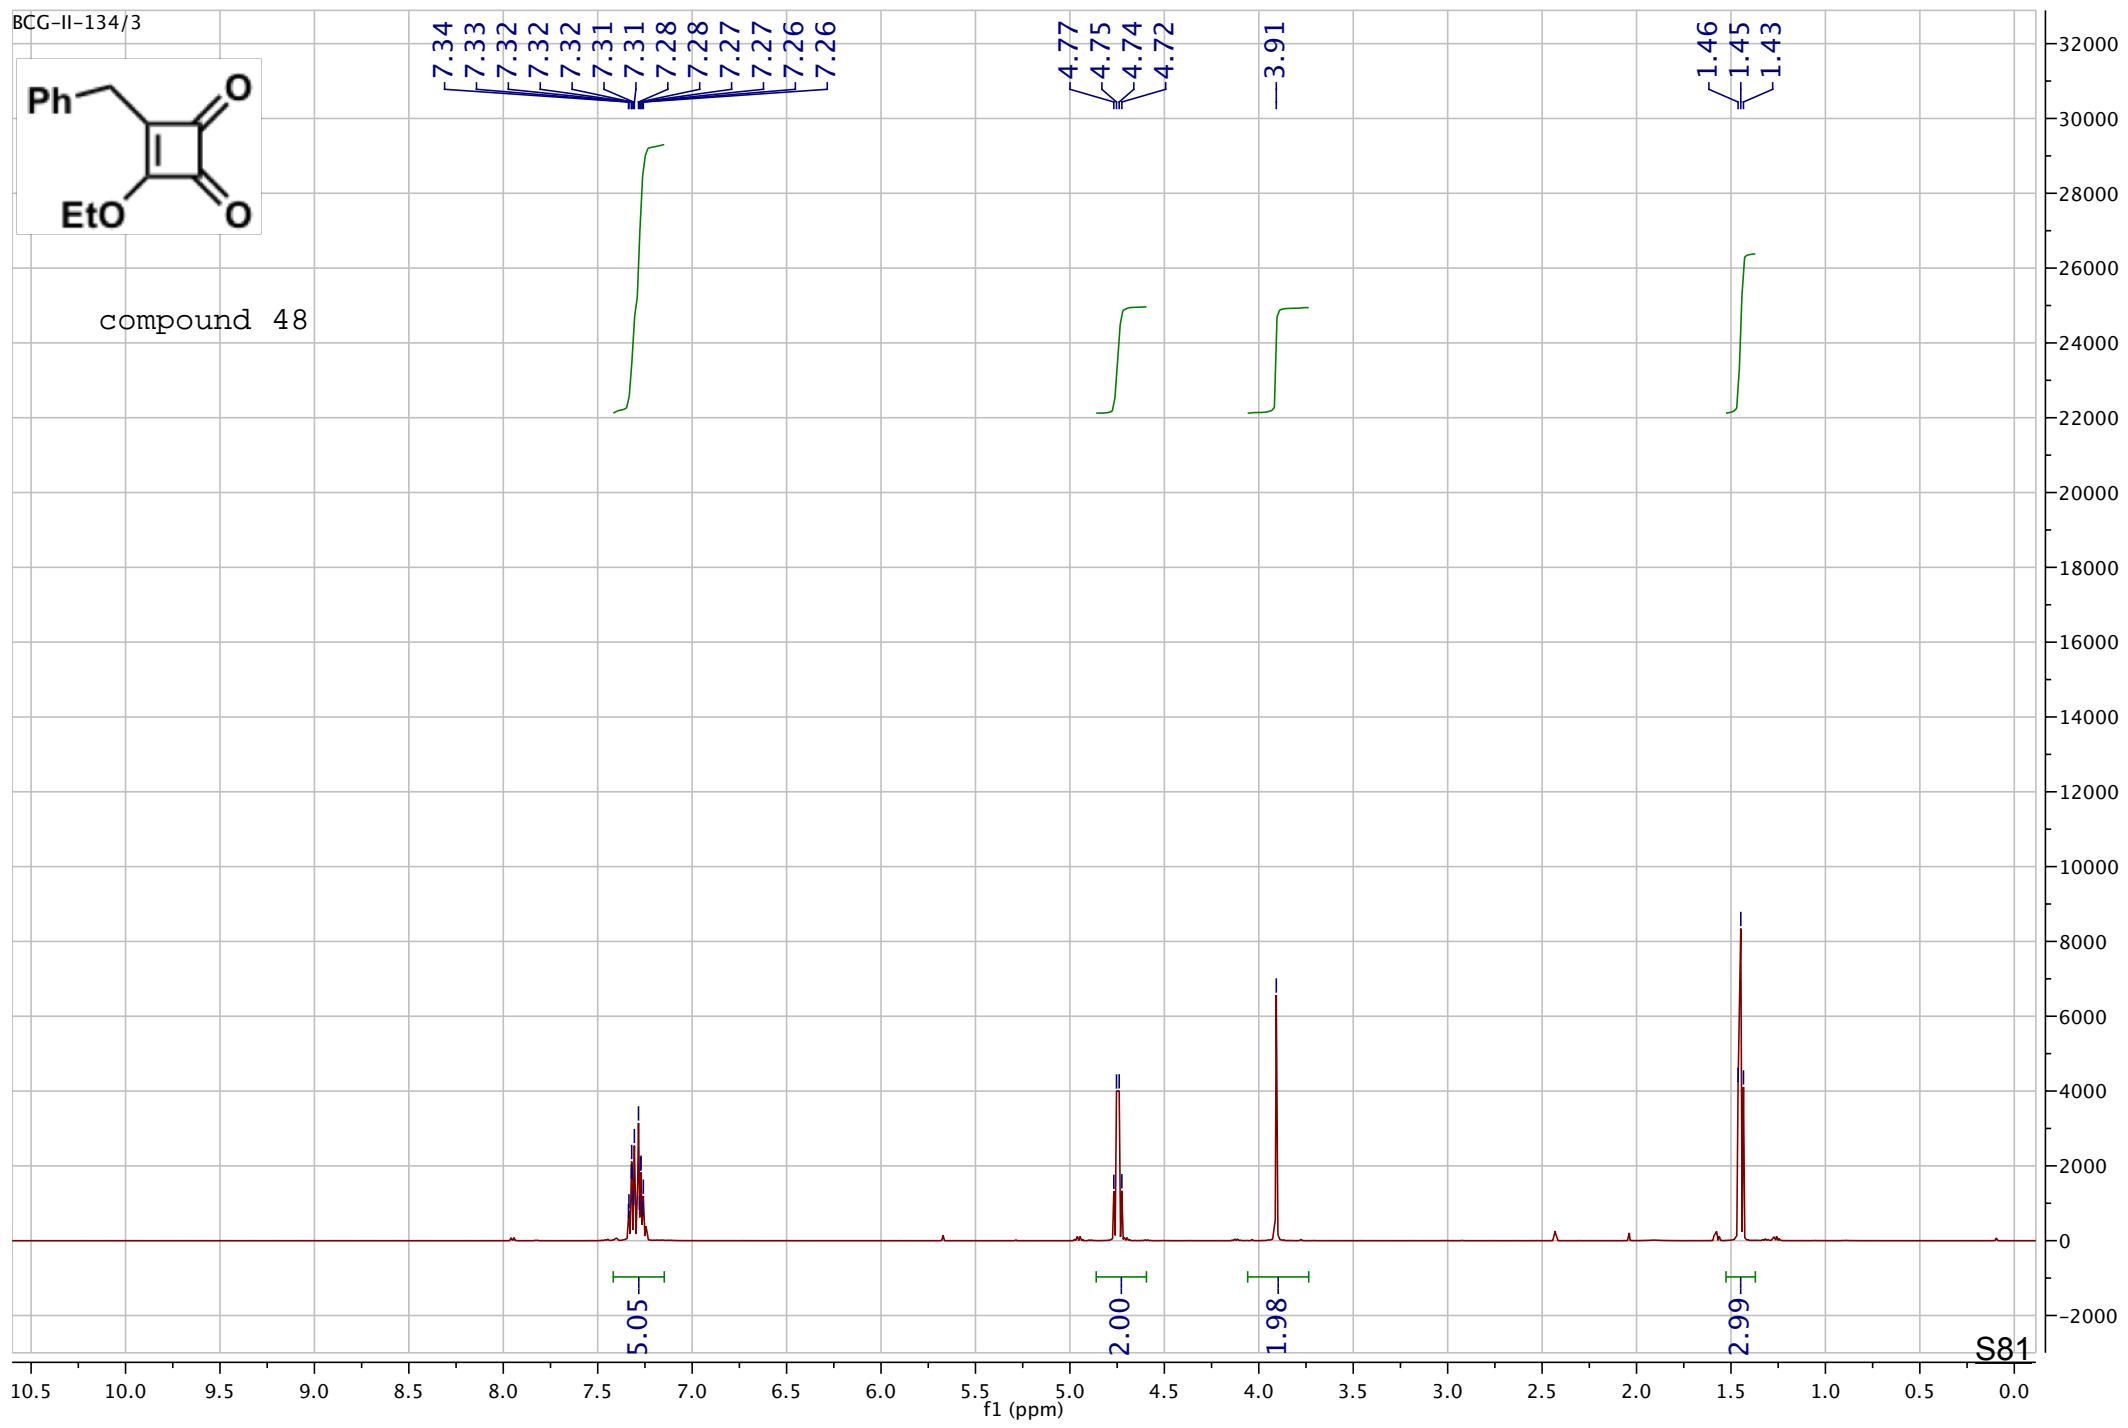

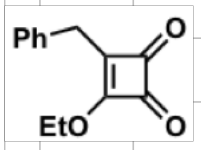

compound 48

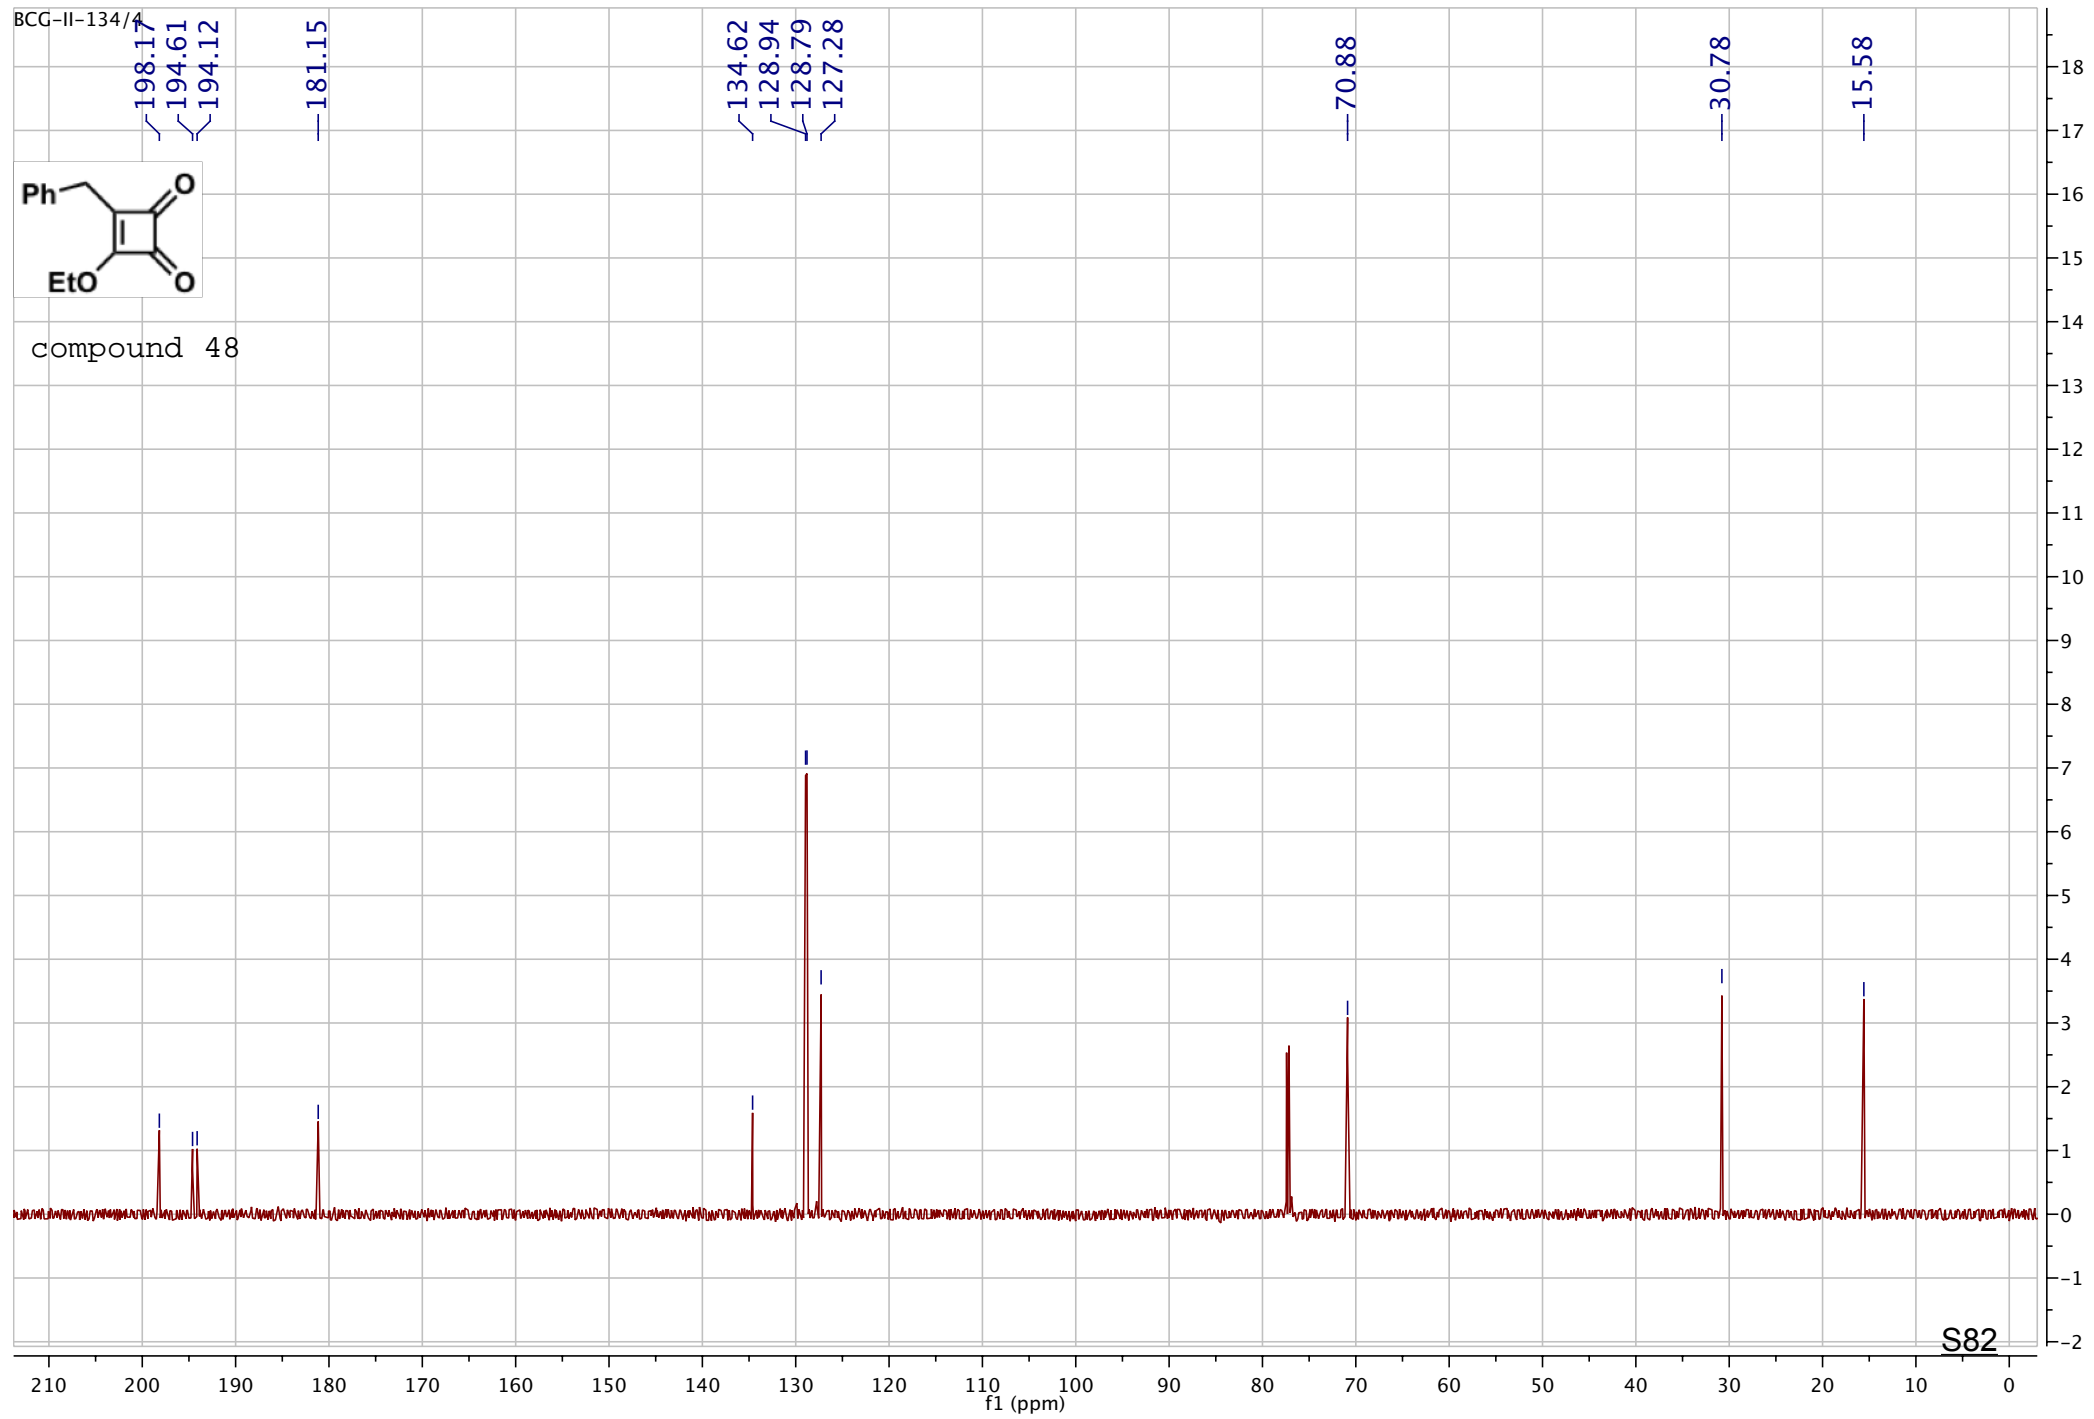

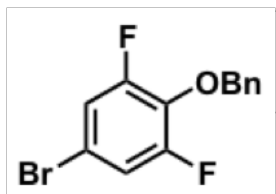

compound 50

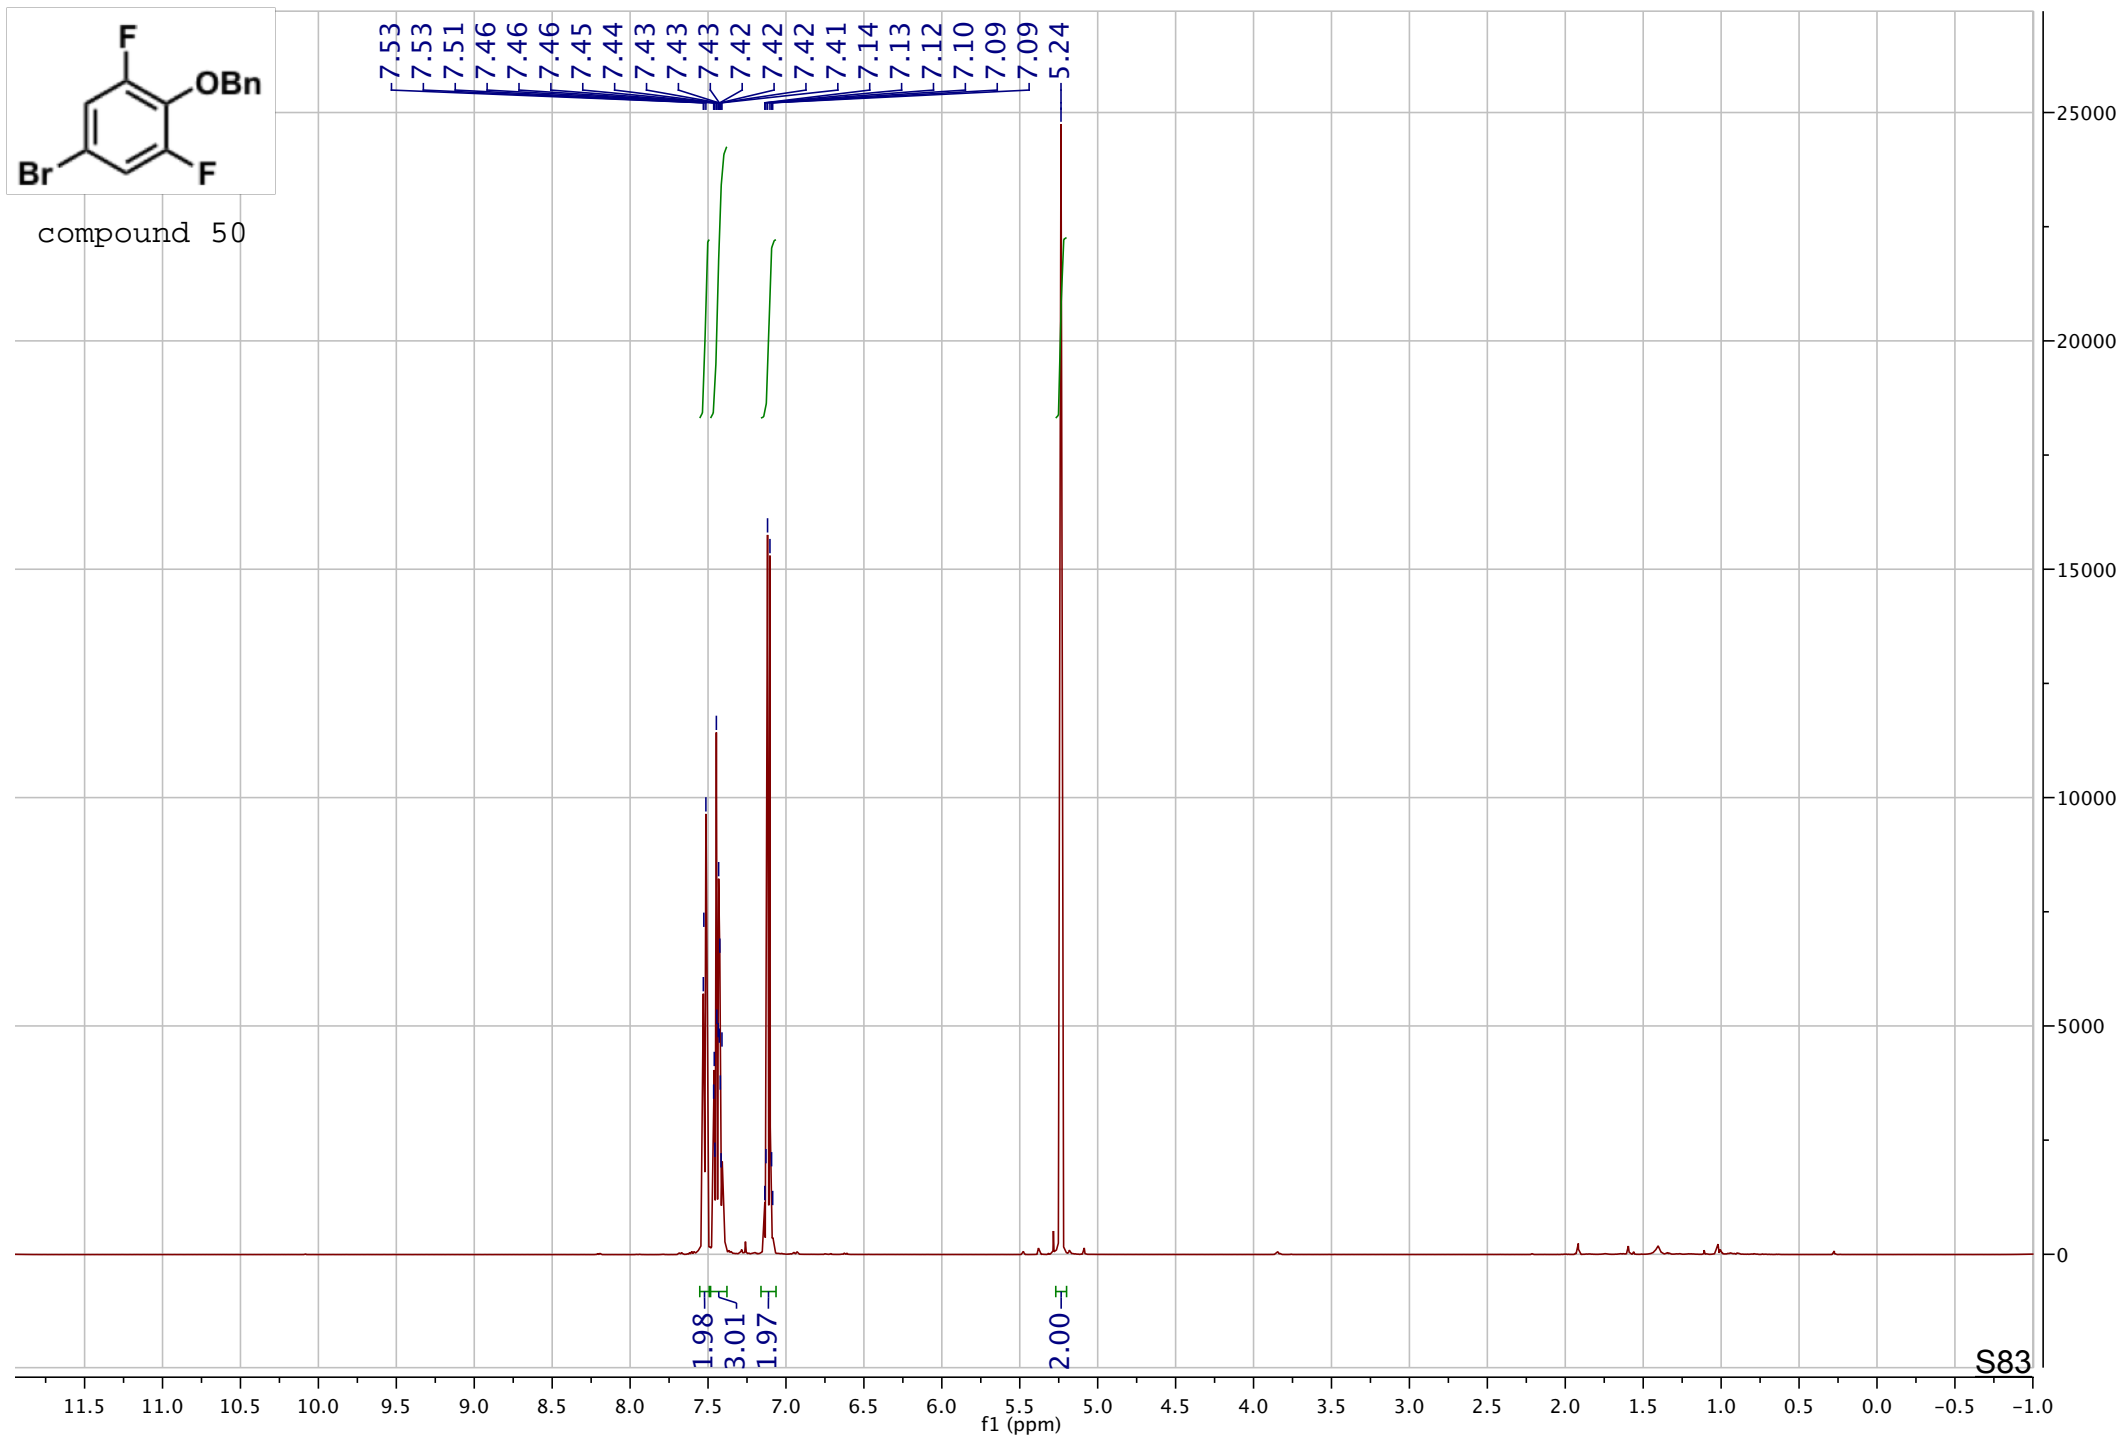

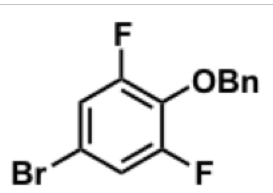

compound 50

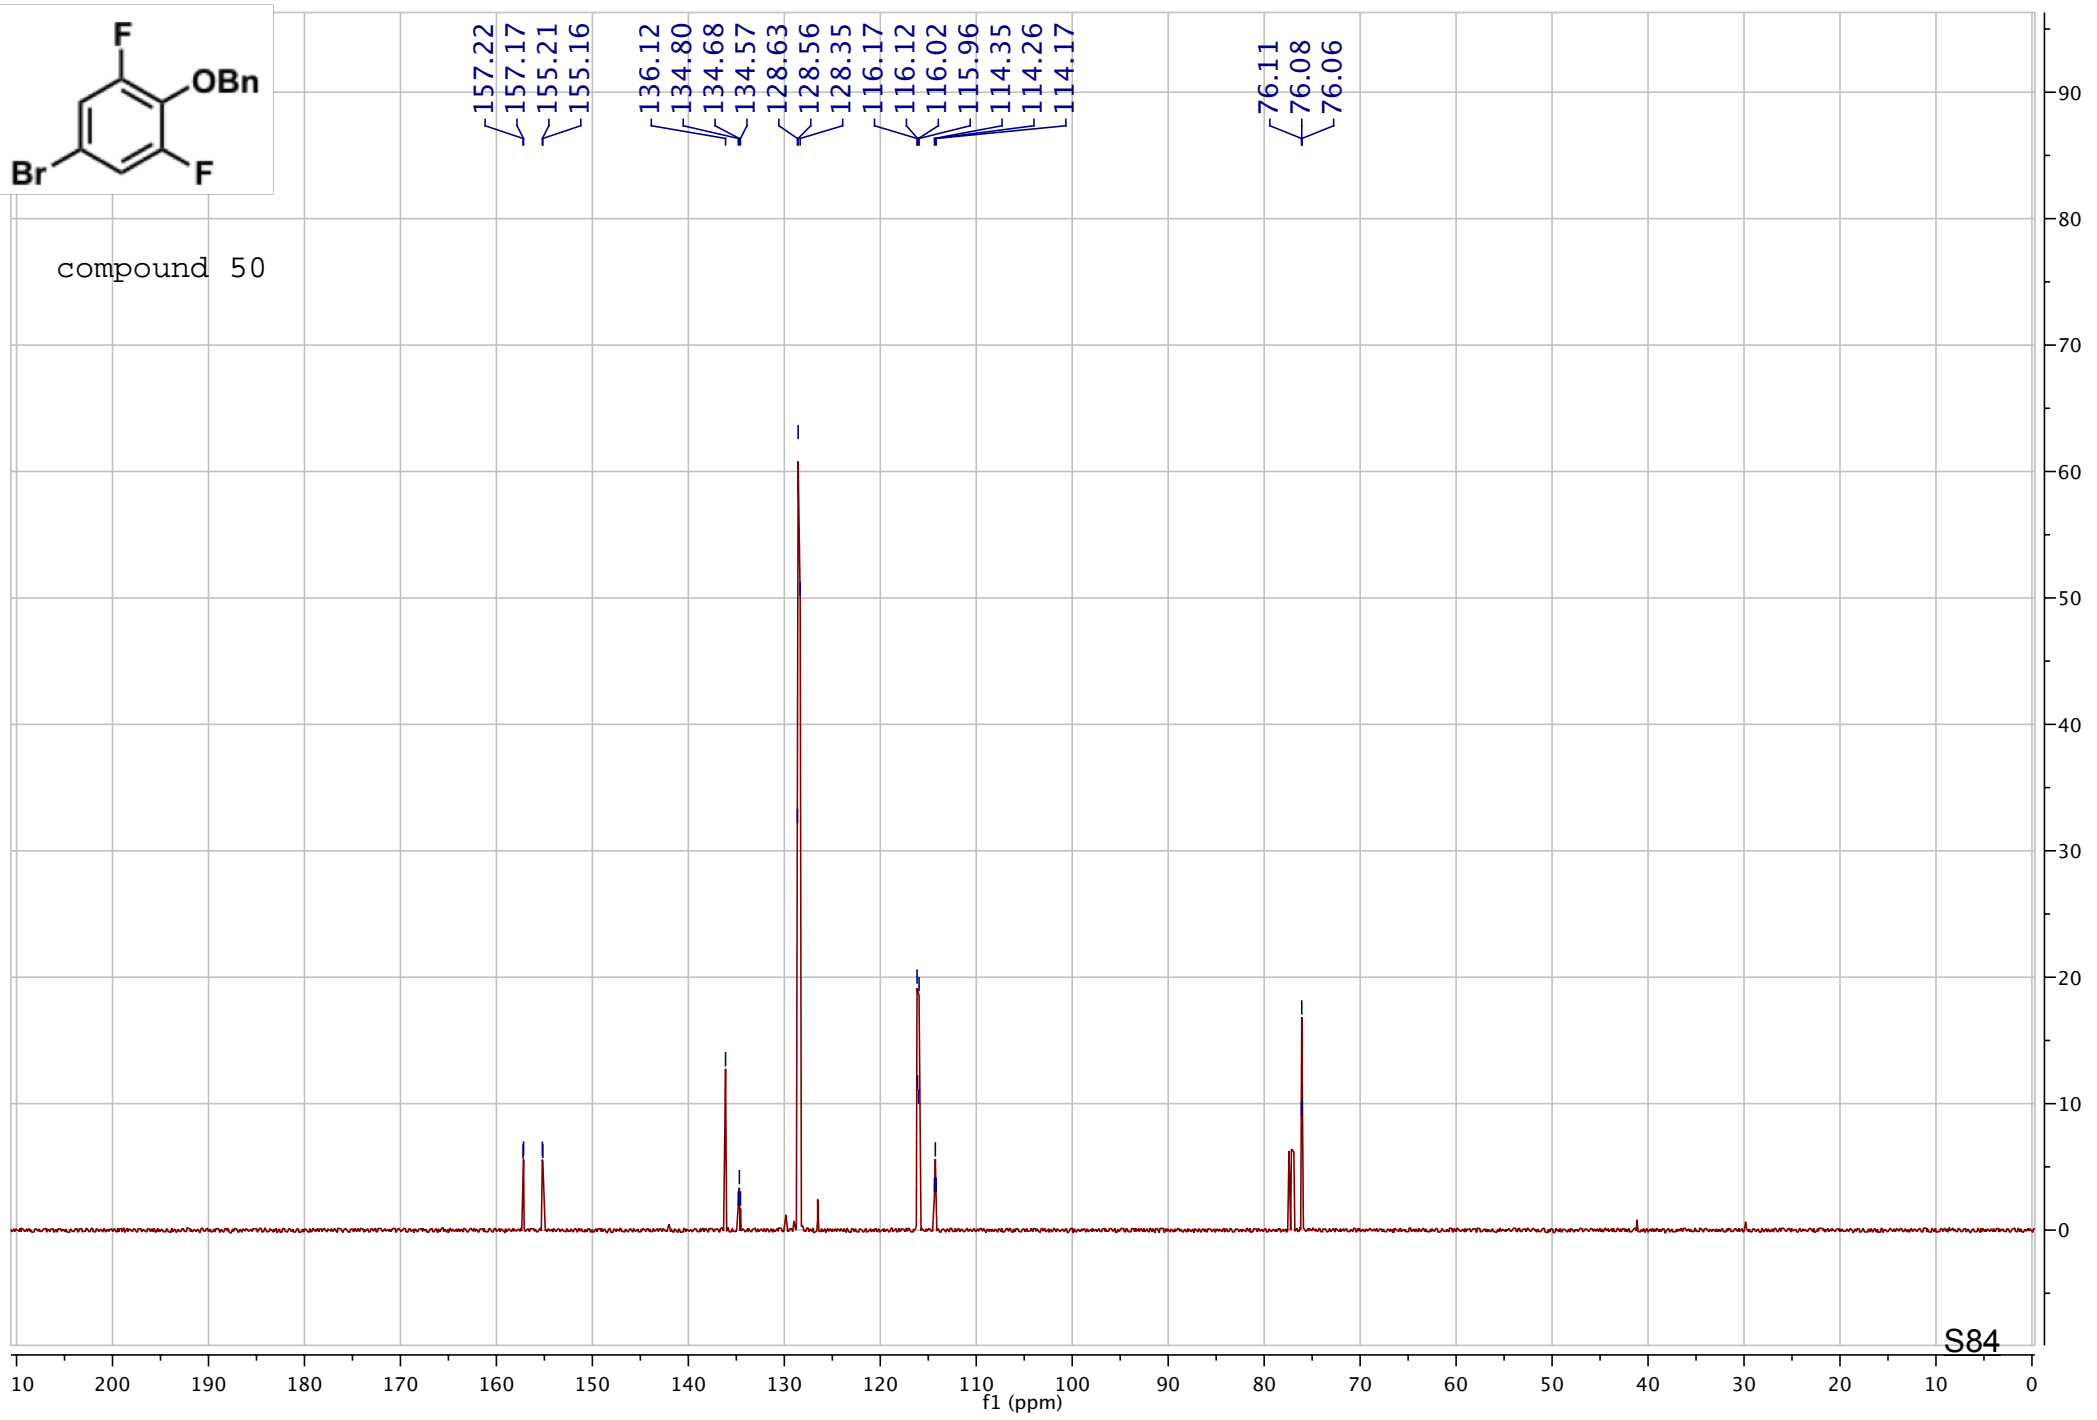

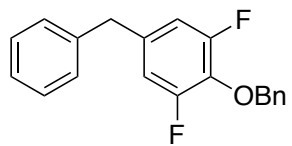

compound 51

7.471  
7.457  
7.396  
7.383  
7.368  
7.356  
7.345  
7.330  
7.315  
7.271  
7.260  
7.256  
7.241  
7.178  
7.163  
6.739  
6.733  
6.723  
6.706  
6.696  
6.690

5.135

3.892

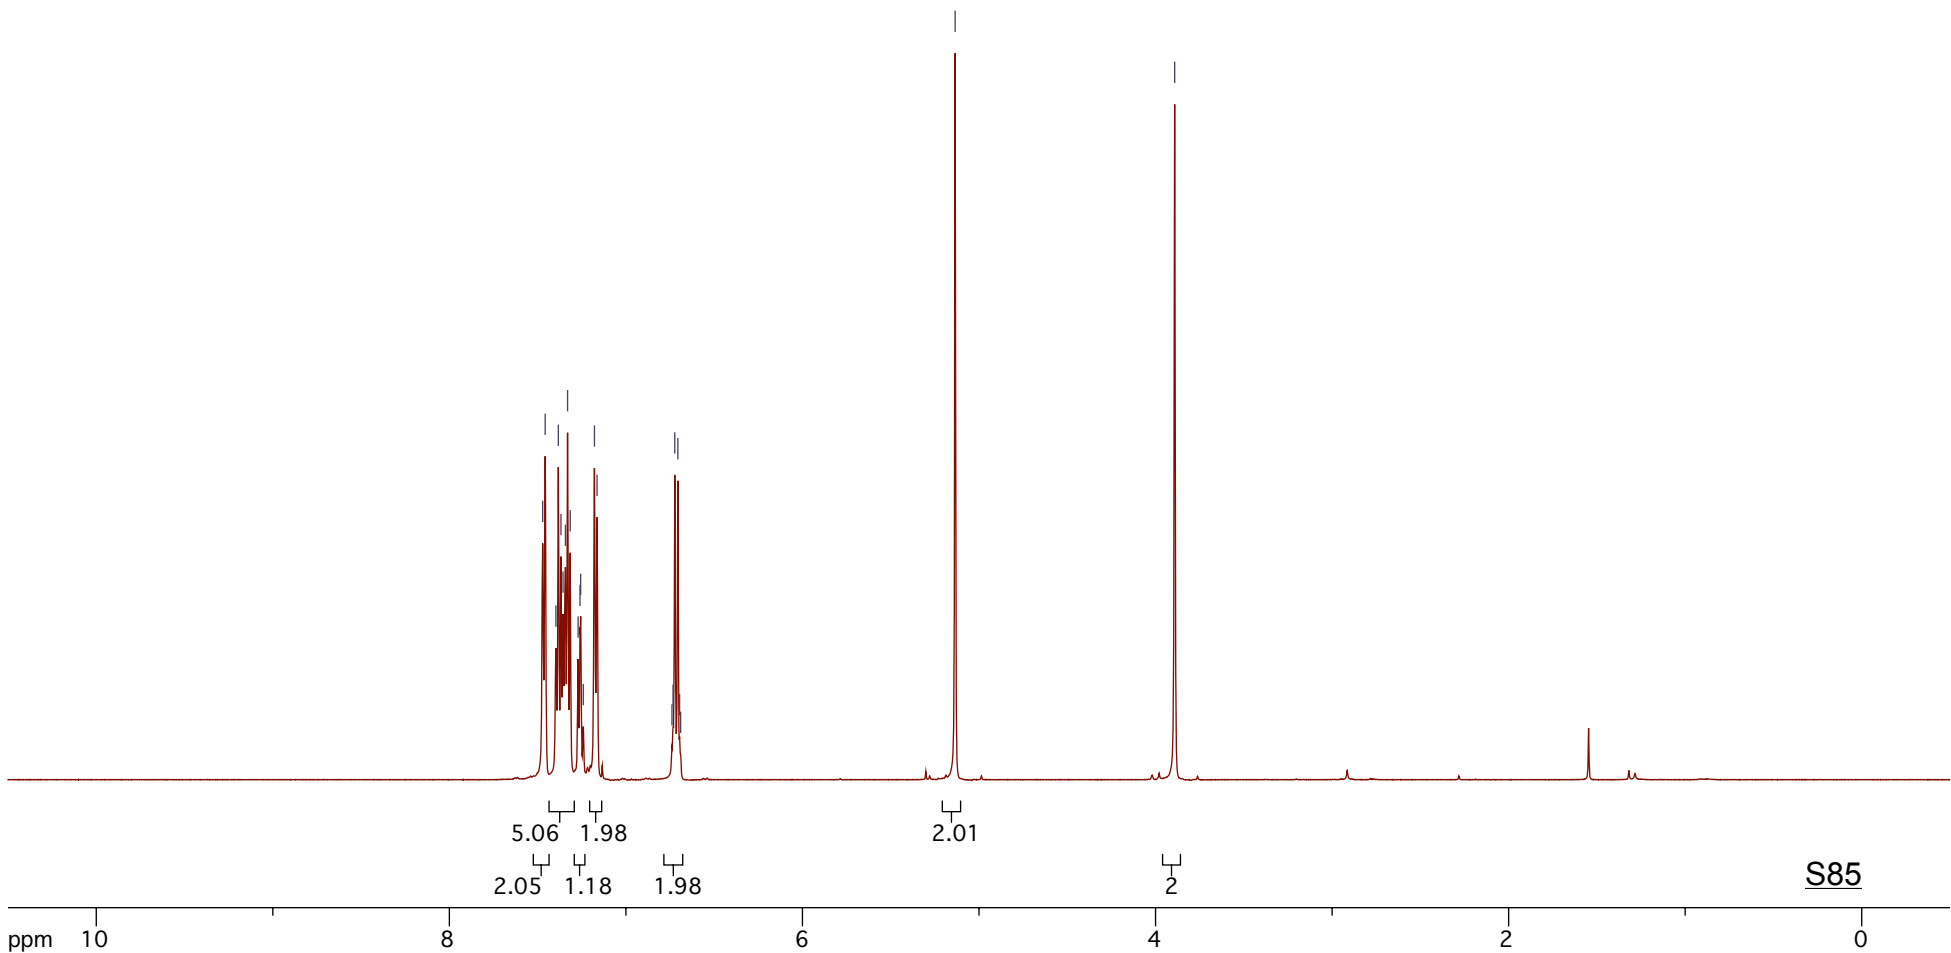



compound 51

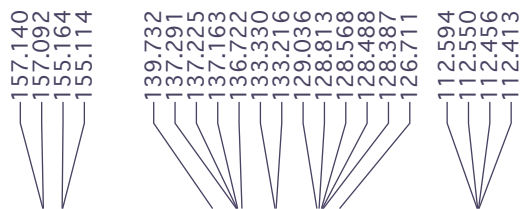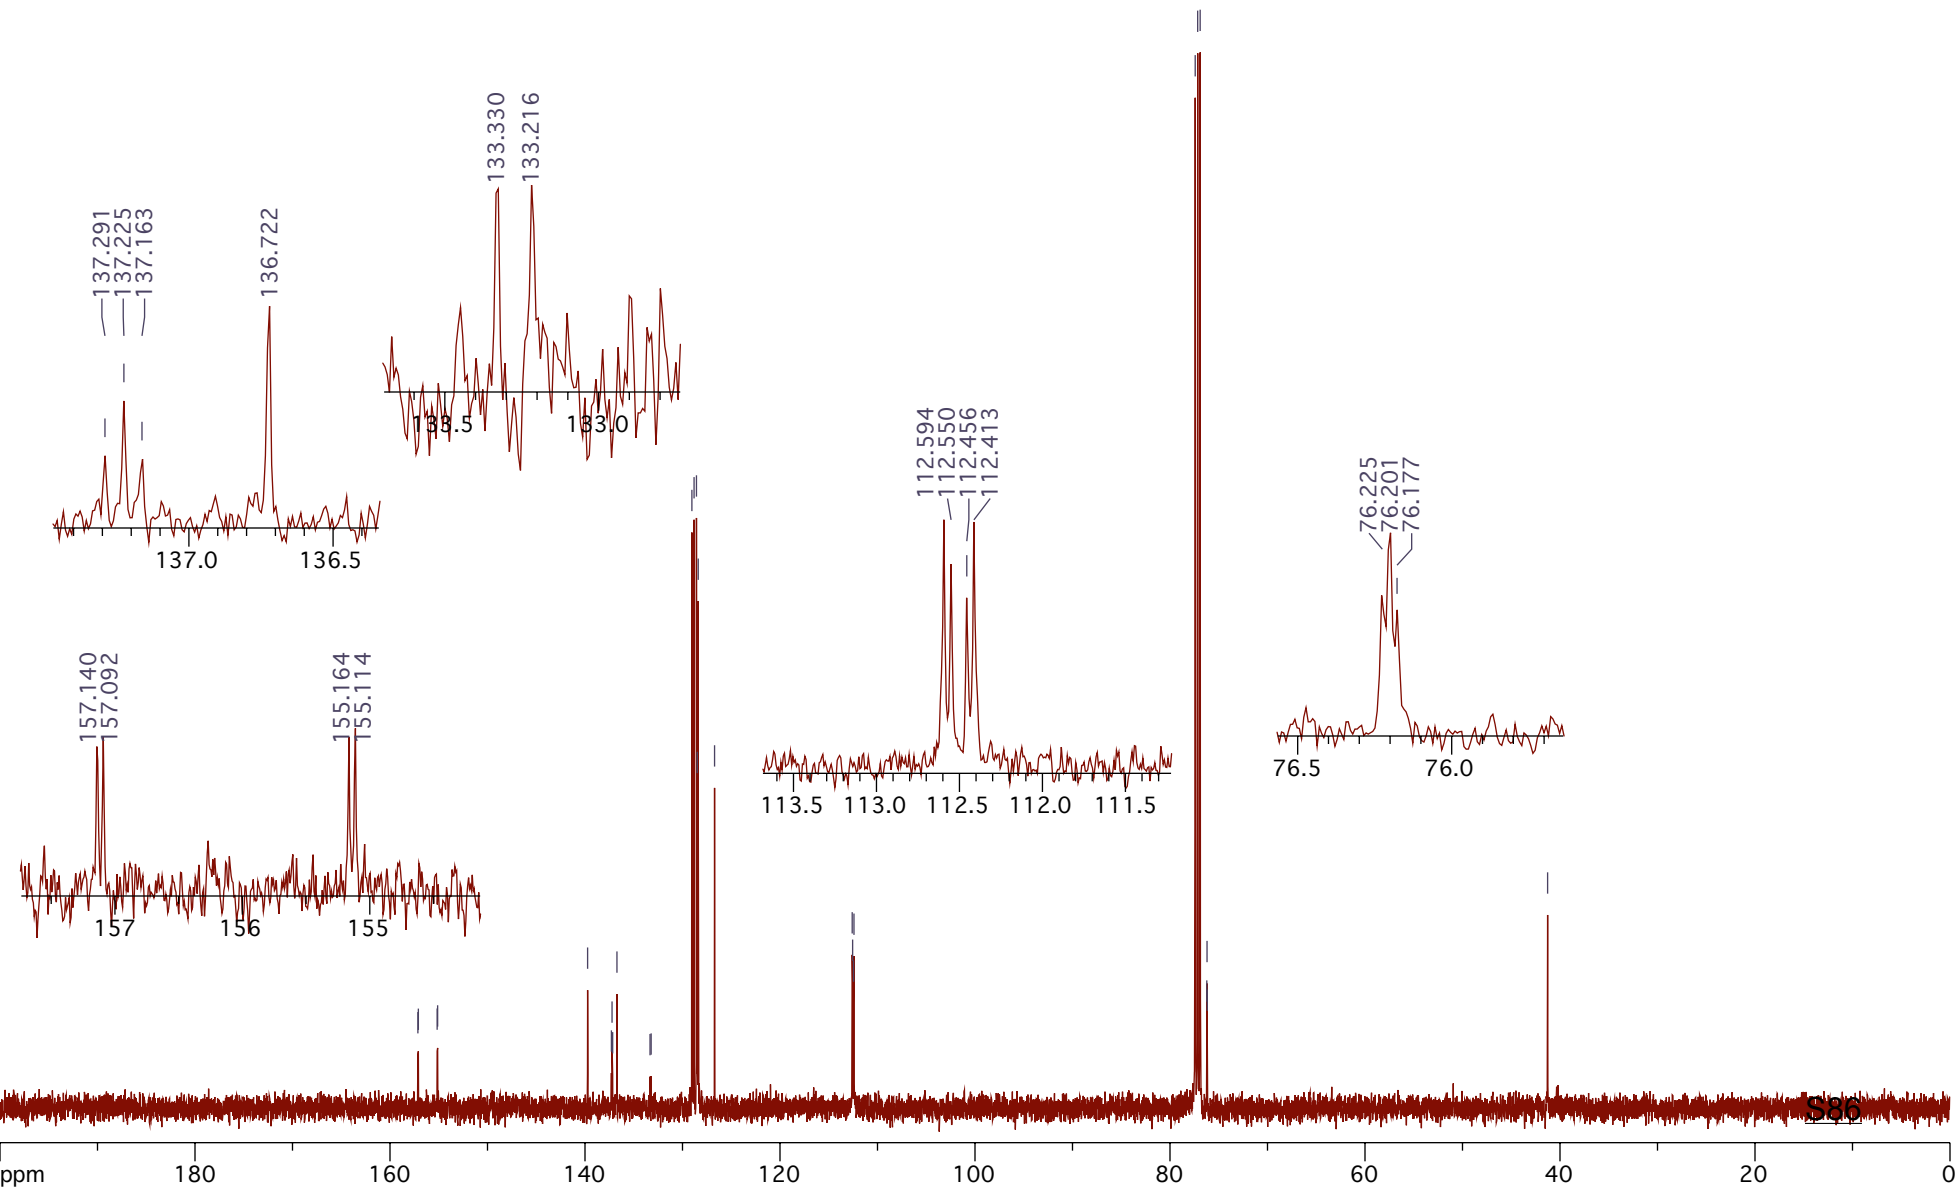

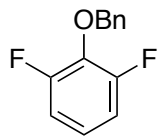

compound 52

7.510  
7.507  
7.493  
7.424  
7.421  
7.418  
7.408  
7.404  
7.392  
7.383  
7.380  
7.377  
7.371  
7.366  
7.359  
7.353  
7.351  
7.260  
6.997  
6.985  
6.982  
6.978  
6.973  
6.968  
6.964  
6.959  
6.952  
6.940  
6.931  
6.920  
6.905  
6.894  
6.889  
6.877  
6.873  
5.209

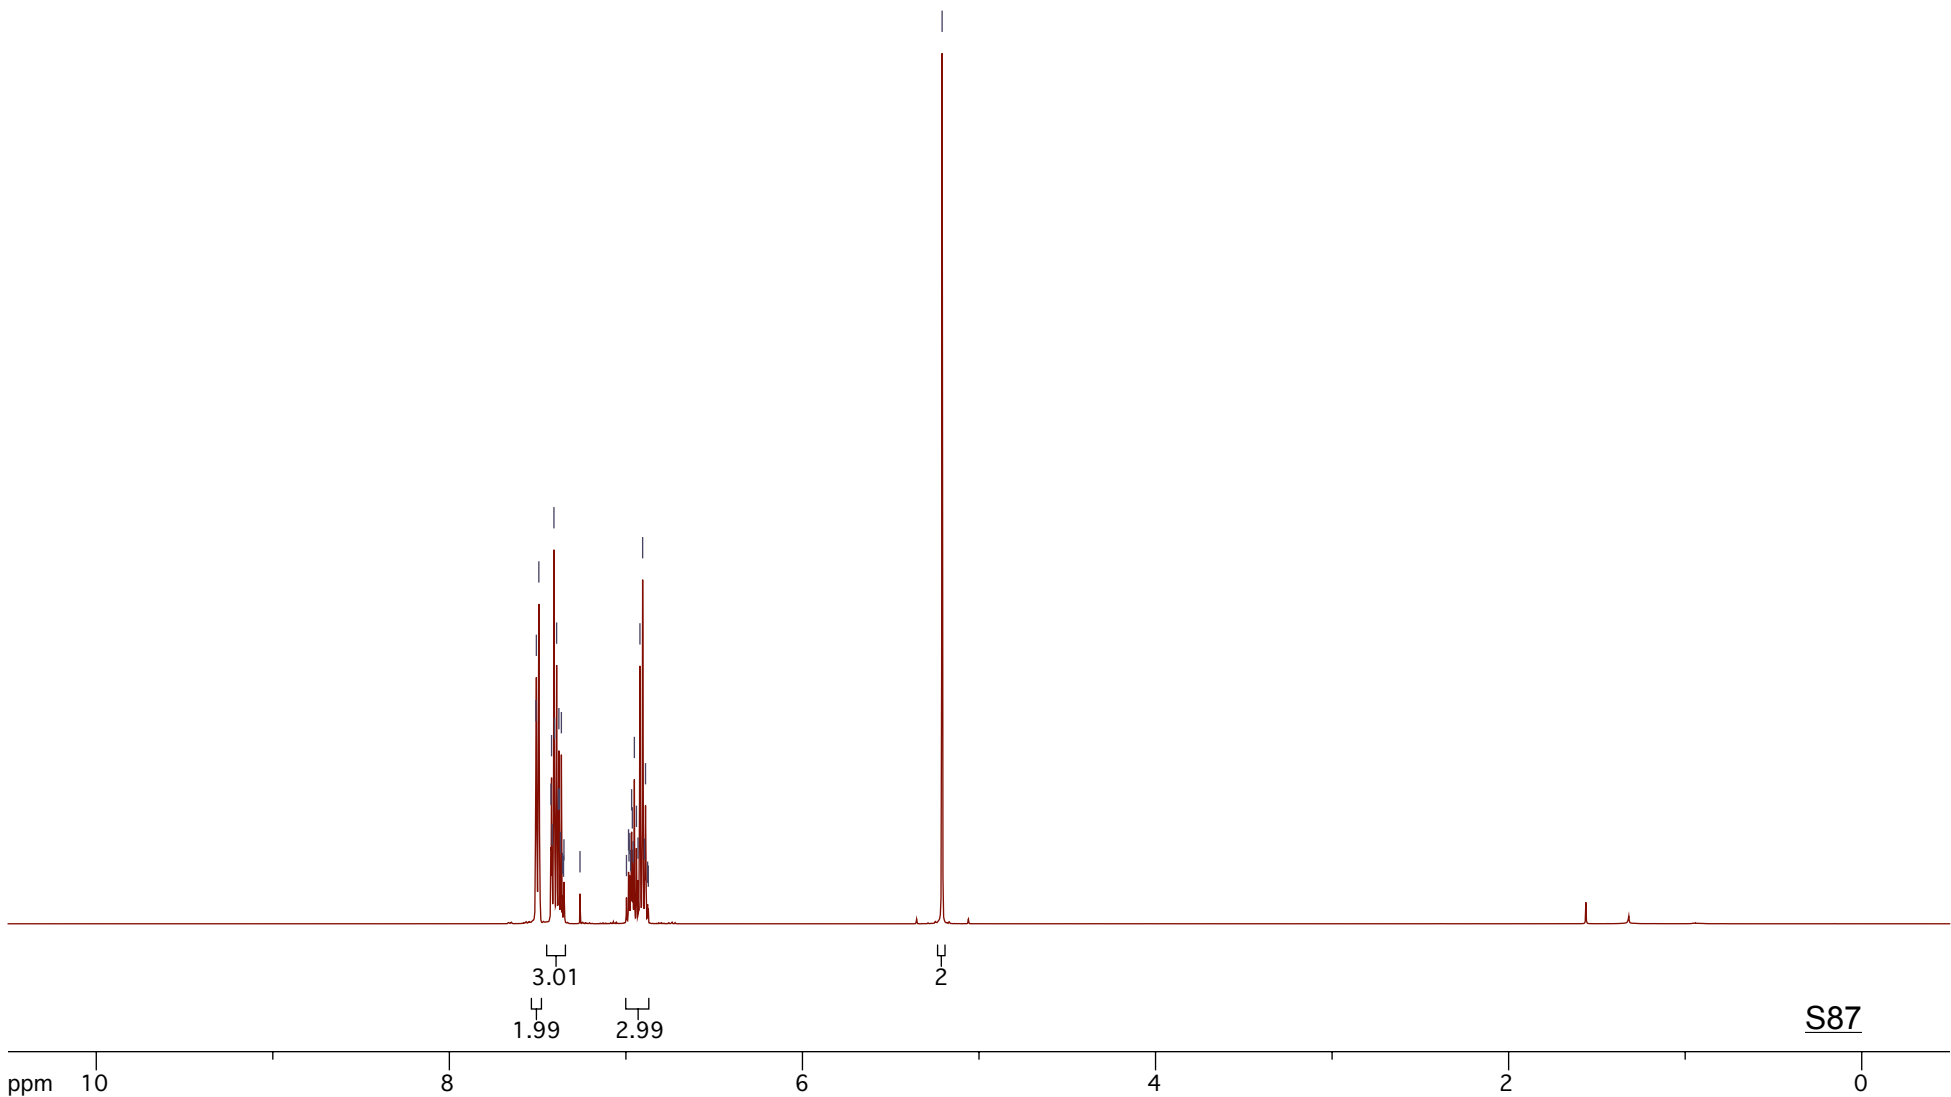

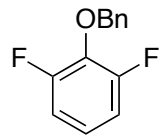

compound 52

157.476  
157.431  
155.502  
155.458

136.619  
135.433  
135.320  
135.209  
128.565  
128.516  
128.384  
123.211  
123.137  
123.064

112.318  
112.275  
112.180  
112.137

77.415  
77.160  
76.906  
76.162  
76.139  
76.113

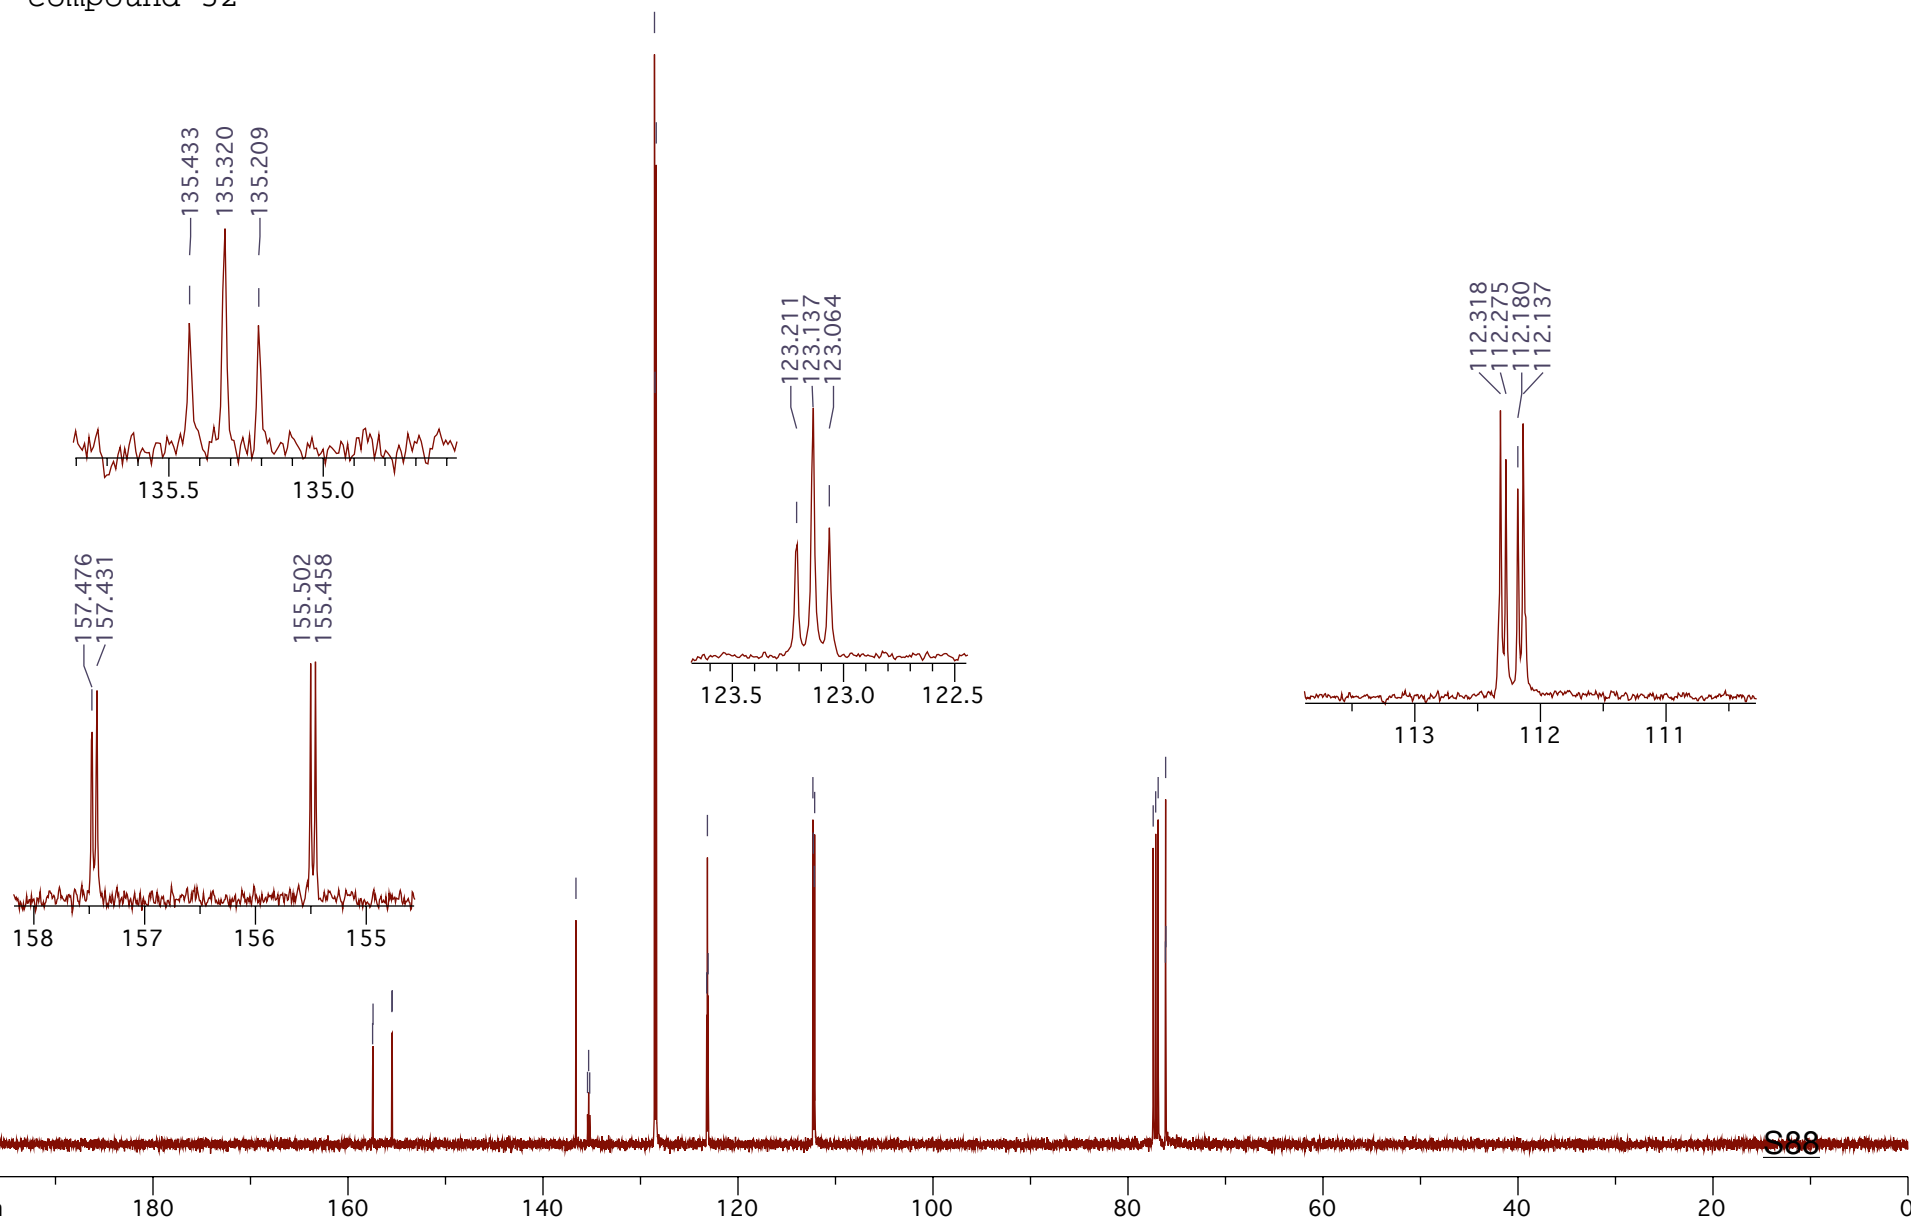



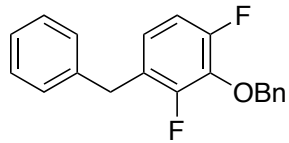

compound 53

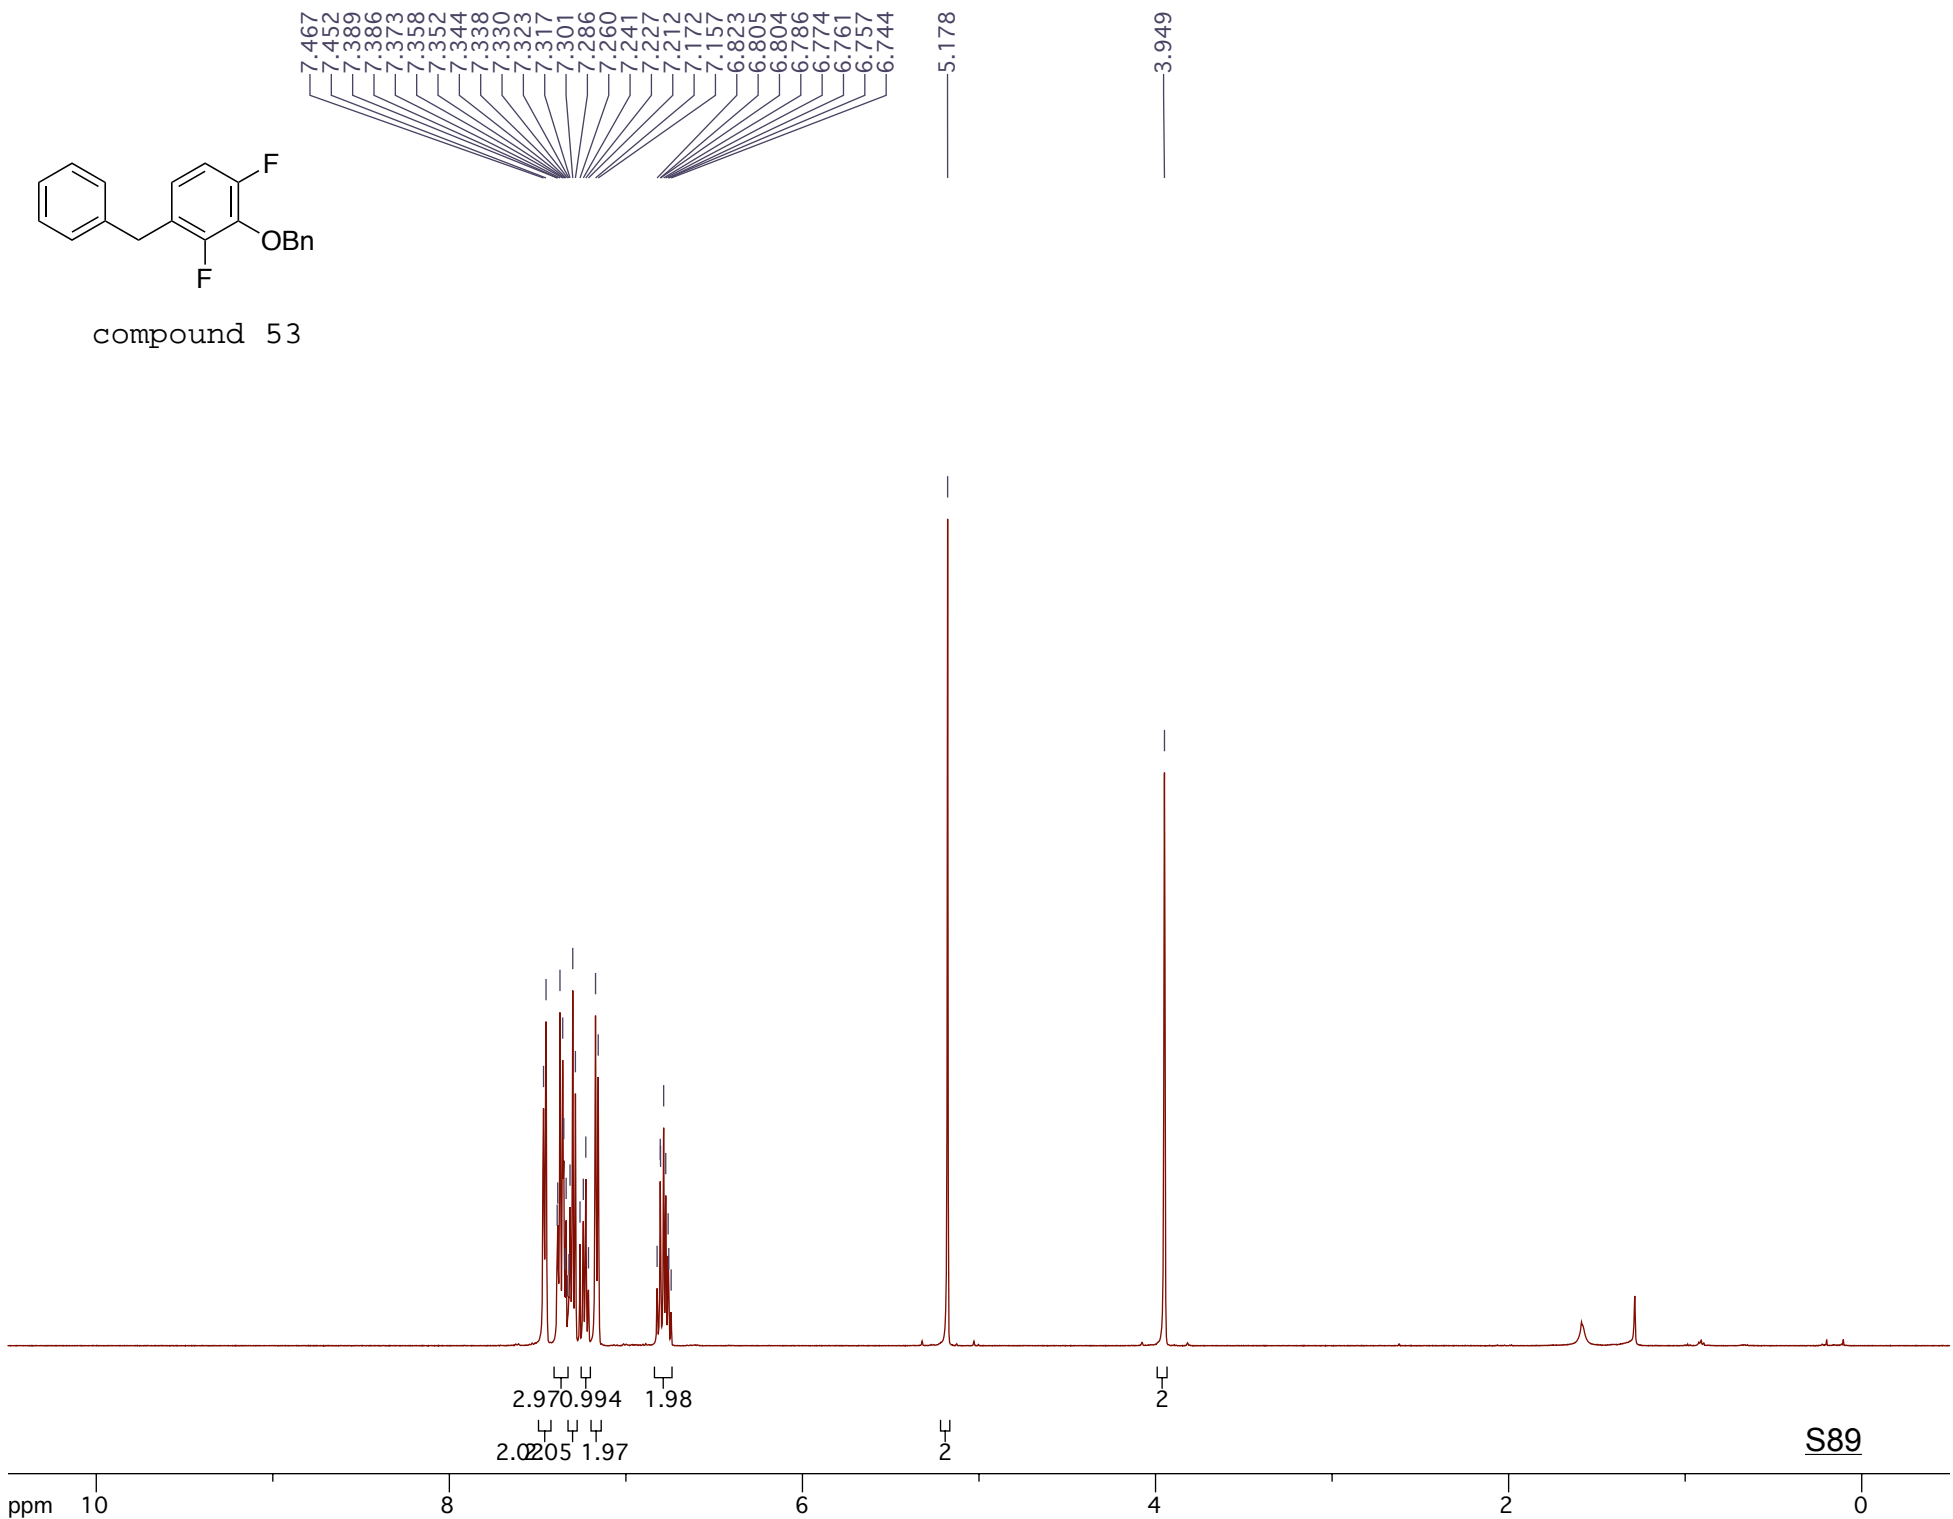

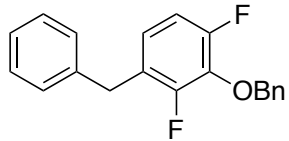

compound 53

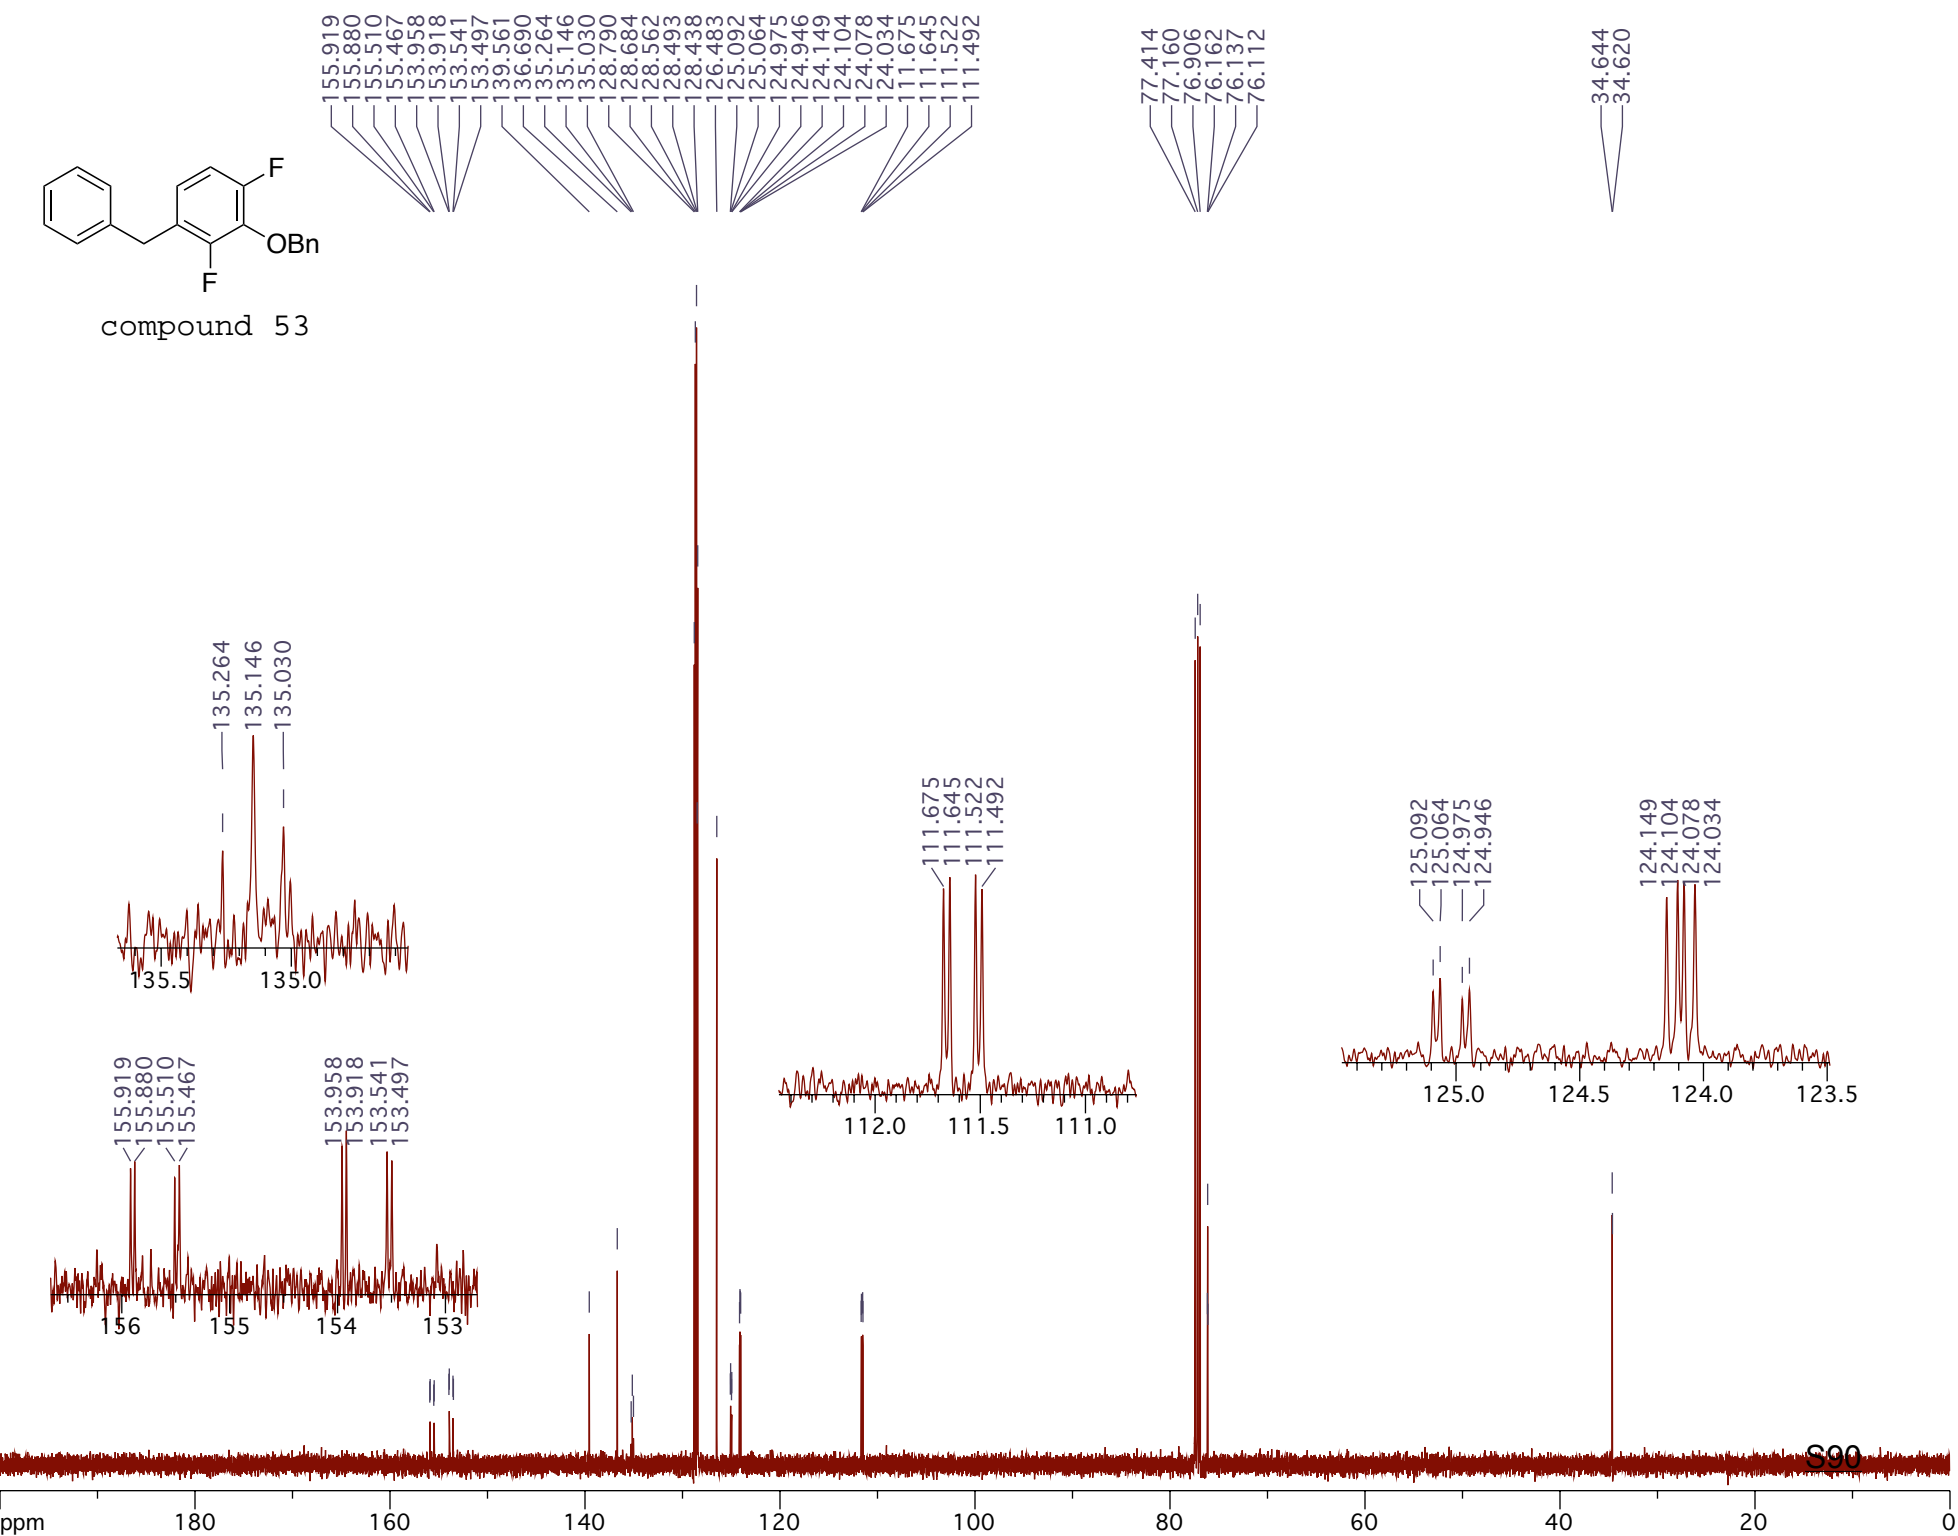

### X-ray Structure Determination of Compound 1359 (i.e., compound 1; CCDC 1428182)

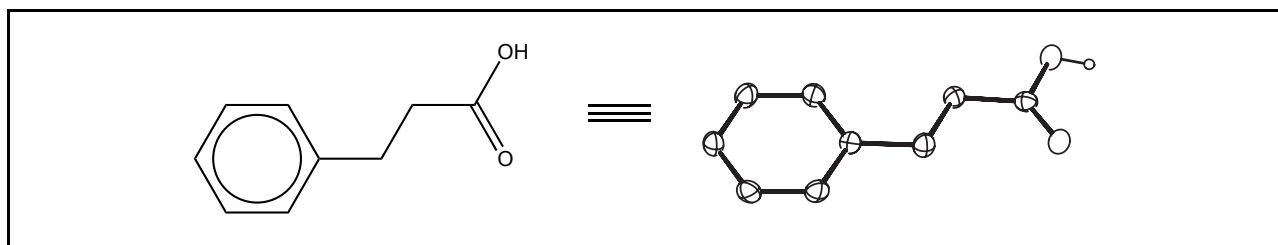

Compound 1359,  $C_9H_{10}O_2$ , crystallizes in the monoclinic space group  $P2_1/n$  (systematic absences  $0k0$ :  $k=\text{odd}$  and  $h0l$ :  $h+l=\text{odd}$ ) with  $a=5.3719(5)\text{\AA}$ ,  $b=9.8005(8)\text{\AA}$ ,  $c=29.865(3)\text{\AA}$ ,  $\beta=93.409(5)^\circ$ ,  $V=1569.5(3)\text{\AA}^3$ ,  $Z=8$ , and  $d_{\text{calc}}=1.271\text{ g/cm}^3$ . X-ray intensity data were collected on a Bruker APEXII CCD area detector employing graphite-monochromated Mo- $K\alpha$  radiation ( $\lambda=0.71073\text{ \AA}$ ) at a temperature of  $100(1)\text{K}$ . Preliminary indexing was performed from a series of thirty-six  $0.5^\circ$  rotation frames with exposures of 10 seconds. A total of 3554 frames were collected with a crystal to detector distance of 45 mm, rotation widths of  $0.5^\circ$  and exposures of 15 seconds:

| scan type | $2\theta$ | $\omega$ | $\phi$ | $\chi$ | frames |
|-----------|-----------|----------|--------|--------|--------|
| $\phi$    | -28.00    | 327.36   | 13.34  | 30.75  | 739    |
| $\omega$  | -28.00    | 317.01   | 106.88 | -35.57 | 241    |
| $\omega$  | 17.00     | 282.37   | 242.48 | 28.88  | 72     |
| $\omega$  | 4.50      | 354.01   | 161.38 | -46.47 | 191    |
| $\phi$    | 17.00     | 262.43   | 153.67 | 52.47  | 207    |
| $\phi$    | 22.00     | 289.31   | 56.37  | 57.63  | 681    |
| $\phi$    | -18.00    | 99.81    | 333.01 | -58.65 | 725    |
| $\omega$  | 19.50     | 127.01   | 144.39 | -96.67 | 106    |
| $\omega$  | 27.00     | 340.80   | 145.93 | 89.24  | 106    |
| $\phi$    | -13.00    | 127.37   | 309.89 | -92.80 | 486    |

Rotation frames were integrated using SAINT<sup>i</sup>, producing a listing of unaveraged  $F^2$  and  $\sigma(F^2)$  values which were then passed to the SHELXTL<sup>ii</sup> program package for further processing and structure solution. A total of 27950 reflections were measured over the ranges  $2.19 \leq \theta \leq 25.42^\circ$ ,  $-6 \leq h \leq 6$ ,  $-11 \leq k \leq 11$ ,  $-35 \leq l \leq 35$  yielding 2894 unique reflections ( $R_{\text{int}} = 0.0392$ ). The intensity data were corrected for Lorentz and polarization effects and for absorption using SADABS<sup>iii</sup> (minimum and maximum transmission 0.6692, 0.7452).

The structure was solved by direct methods (SHELXS-97<sup>iv</sup>). The asymmetric unit consists of two

crystallographically independent molecules. Refinement was by full-matrix least squares based on  $F^2$  using SHELXL-97.<sup>v</sup> All reflections were used during refinement. The weighting scheme used was  $w=1/[\sigma^2(F_o^2) + (0.0421P)^2 + 0.5360P]$  where  $P = (F_o^2 + 2F_c^2)/3$ . Non-hydrogen atoms were refined anisotropically and hydrogen atoms were refined using a riding model. Refinement converged to  $R1=0.0362$  and  $wR2=0.0840$  for 2388 observed reflections for which  $F > 4\sigma(F)$  and  $R1=0.0485$  and  $wR2=0.0899$  and  $GOF = 1.021$  for all 2894 unique, non-zero reflections and 202 variables.<sup>vi</sup> The maximum  $\Delta/\sigma$  in the final cycle of least squares was 0.000 and the two most prominent peaks in the final difference Fourier were  $+0.170$  and  $-0.197 e/\text{\AA}^3$ .

Table 1. lists cell information, data collection parameters, and refinement data. Final positional and equivalent isotropic thermal parameters are given in Tables 2. and 3. Anisotropic thermal parameters are in Table 4. Tables 5. and 6. list bond distances and bond angles. Figure 1. is an ORTEP<sup>vii</sup> representation of the molecule with 50% probability thermal ellipsoids displayed.

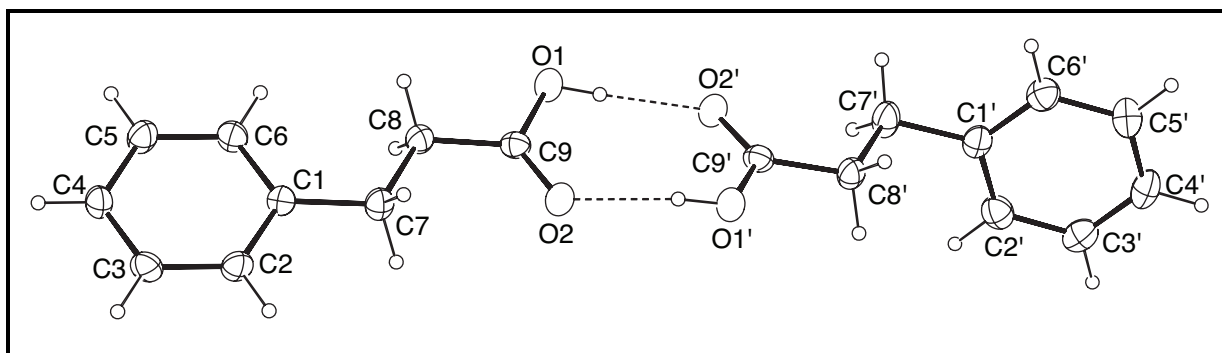

Figure 1. ORTEP drawing of the title compound with 50% probability thermal ellipsoids.

**Table 1. Summary of Structure Determination of Compound 1359**

|                                   |                                               |
|-----------------------------------|-----------------------------------------------|
| Empirical formula                 | C <sub>9</sub> H <sub>10</sub> O <sub>2</sub> |
| Formula weight                    | 150.17                                        |
| Temperature                       | 100(1) K                                      |
| Wavelength                        | 0.71073 Å                                     |
| Crystal system                    | monoclinic                                    |
| Space group                       | P2 <sub>1</sub> /n                            |
| Cell constants:                   |                                               |
| a                                 | 5.3719(5) Å                                   |
| b                                 | 9.8005(8) Å                                   |
| c                                 | 29.865(3) Å                                   |
| β                                 | 93.409(5)°                                    |
| Volume                            | 1569.5(3) Å <sup>3</sup>                      |
| Z                                 | 8                                             |
| Density (calculated)              | 1.271 Mg/m <sup>3</sup>                       |
| Absorption coefficient            | 0.089 mm <sup>-1</sup>                        |
| F(000)                            | 640                                           |
| Crystal size                      | 0.42 x 0.12 x 0.03 mm <sup>3</sup>            |
| Theta range for data collection   | 2.19 to 25.42°                                |
| Index ranges                      | -6 ≤ h ≤ 6, -11 ≤ k ≤ 11, -35 ≤ l ≤ 35        |
| Reflections collected             | 27950                                         |
| Independent reflections           | 2894 [R(int) = 0.0392]                        |
| Completeness to theta = 25.42°    | 99.3 %                                        |
| Absorption correction             | Semi-empirical from equivalents               |
| Max. and min. transmission        | 0.7452 and 0.6692                             |
| Refinement method                 | Full-matrix least-squares on F <sup>2</sup>   |
| Data / restraints / parameters    | 2894 / 0 / 202                                |
| Goodness-of-fit on F <sup>2</sup> | 1.021                                         |
| Final R indices [I > 2σ(I)]       | R1 = 0.0362, wR2 = 0.0840                     |
| R indices (all data)              | R1 = 0.0485, wR2 = 0.0899                     |
| Largest diff. peak and hole       | 0.170 and -0.197 e.Å <sup>-3</sup>            |

**Table 2. Refined Positional Parameters for Compound 1359**

| Atom | x           | y            | z          | $U_{eq}, \text{Å}^2$ |
|------|-------------|--------------|------------|----------------------|
| C1   | 0.1353(2)   | 0.11084(13)  | 0.54973(4) | 0.0195(3)            |
| C2   | 0.1832(3)   | -0.02439(14) | 0.56159(5) | 0.0243(3)            |
| C3   | 0.0446(3)   | -0.09004(14) | 0.59254(4) | 0.0249(3)            |
| C4   | -0.1455(3)  | -0.02247(14) | 0.61232(5) | 0.0241(3)            |
| C5   | -0.1941(3)  | 0.11174(14)  | 0.60119(5) | 0.0268(3)            |
| C6   | -0.0537(3)  | 0.17766(14)  | 0.57020(5) | 0.0244(3)            |
| C7   | 0.2893(3)   | 0.17705(14)  | 0.51510(5) | 0.0232(3)            |
| C8   | 0.1999(3)   | 0.31682(13)  | 0.49922(4) | 0.0219(3)            |
| C9   | 0.3543(3)   | 0.37850(13)  | 0.46460(4) | 0.0209(3)            |
| O1   | 0.28454(19) | 0.50382(10)  | 0.45353(3) | 0.0280(3)            |
| O2   | 0.52771(19) | 0.32158(10)  | 0.44791(3) | 0.0288(3)            |
| C1'  | 0.8639(3)   | 0.76711(14)  | 0.26931(5) | 0.0245(3)            |
| C2'  | 0.8143(3)   | 0.70407(15)  | 0.22799(5) | 0.0289(3)            |
| C3'  | 0.9531(3)   | 0.73432(15)  | 0.19185(5) | 0.0301(3)            |
| C4'  | 1.1441(3)   | 0.82826(16)  | 0.19608(5) | 0.0305(4)            |
| C5'  | 1.1934(3)   | 0.89318(16)  | 0.23672(5) | 0.0314(4)            |
| C6'  | 1.0542(3)   | 0.86245(15)  | 0.27287(5) | 0.0281(3)            |
| C7'  | 0.7237(3)   | 0.72722(15)  | 0.30959(5) | 0.0292(3)            |
| C8'  | 0.8342(3)   | 0.59731(14)  | 0.33096(5) | 0.0247(3)            |
| C9'  | 0.7017(3)   | 0.54585(13)  | 0.37008(5) | 0.0222(3)            |
| O1'  | 0.80900(18) | 0.43700(9)   | 0.38861(3) | 0.0259(2)            |
| O2'  | 0.51387(19) | 0.59721(10)  | 0.38365(3) | 0.0279(2)            |

$U_{eq} = \frac{1}{3}[U_{11}(aa^*)^2 + U_{22}(bb^*)^2 + U_{33}(cc^*)^2 + 2U_{12}aa^*bb^*\cos \gamma + 2U_{13}aa^*cc^*\cos \beta + 2U_{23}bb^*cc^*\cos \alpha]$

**Table 3. Positional Parameters for Hydrogens in Compound 1359**

| Atom | x       | y       | z      | $U_{iso}, \text{Å}^2$ |
|------|---------|---------|--------|-----------------------|
| H2   | 0.3106  | -0.0712 | 0.5485 | 0.032                 |
| H3   | 0.0796  | -0.1804 | 0.6001 | 0.033                 |
| H4   | -0.2400 | -0.0670 | 0.6329 | 0.032                 |
| H5   | -0.3213 | 0.1583  | 0.6145 | 0.036                 |
| H6   | -0.0876 | 0.2684  | 0.5631 | 0.032                 |
| H7a  | 0.2914  | 0.1171  | 0.4893 | 0.031                 |
| H7b  | 0.4596  | 0.1854  | 0.5275 | 0.031                 |
| H8a  | 0.0291  | 0.3091  | 0.4870 | 0.029                 |
| H8b  | 0.2004  | 0.3777  | 0.5248 | 0.029                 |
| H1   | 0.3624  | 0.5299  | 0.4323 | 0.042                 |
| H2'  | 0.6858  | 0.6406  | 0.2247 | 0.038                 |
| H3'  | 0.9175  | 0.6911  | 0.1645 | 0.040                 |
| H4'  | 1.2389  | 0.8478  | 0.1718 | 0.041                 |
| H5'  | 1.3204  | 0.9576  | 0.2398 | 0.042                 |
| H6'  | 1.0890  | 0.9066  | 0.3001 | 0.037                 |
| H7'1 | 0.5495  | 0.7122  | 0.3005 | 0.039                 |
| H7'2 | 0.7330  | 0.8007  | 0.3314 | 0.039                 |
| H8'1 | 0.8326  | 0.5263  | 0.3083 | 0.033                 |
| H8'2 | 1.0069  | 0.6147  | 0.3406 | 0.033                 |
| H1'  | 0.7218  | 0.4068  | 0.4079 | 0.039                 |

**Table 4. Refined Thermal Parameters (U's) for Compound 1359**

| Atom | U <sub>11</sub> | U <sub>22</sub> | U <sub>33</sub> | U <sub>23</sub> | U <sub>13</sub> | U <sub>12</sub> |
|------|-----------------|-----------------|-----------------|-----------------|-----------------|-----------------|
| C1   | 0.0190(7)       | 0.0210(7)       | 0.0184(6)       | 0.0015(5)       | -0.0003(5)      | 0.0007(5)       |
| C2   | 0.0251(8)       | 0.0219(7)       | 0.0263(7)       | 0.0010(6)       | 0.0052(6)       | 0.0069(6)       |
| C3   | 0.0319(8)       | 0.0176(6)       | 0.0254(7)       | 0.0035(5)       | 0.0013(6)       | 0.0032(6)       |
| C4   | 0.0273(8)       | 0.0242(7)       | 0.0210(7)       | 0.0033(6)       | 0.0040(6)       | -0.0027(6)      |
| C5   | 0.0271(8)       | 0.0261(7)       | 0.0279(7)       | 0.0035(6)       | 0.0086(6)       | 0.0066(6)       |
| C6   | 0.0264(8)       | 0.0192(7)       | 0.0278(7)       | 0.0052(6)       | 0.0044(6)       | 0.0058(6)       |
| C7   | 0.0208(7)       | 0.0234(7)       | 0.0258(7)       | 0.0040(6)       | 0.0046(6)       | 0.0043(6)       |
| C8   | 0.0225(7)       | 0.0203(7)       | 0.0232(7)       | 0.0010(5)       | 0.0047(6)       | 0.0017(5)       |
| C9   | 0.0235(7)       | 0.0179(6)       | 0.0210(7)       | -0.0004(5)      | 0.0003(6)       | 0.0019(6)       |
| O1   | 0.0324(6)       | 0.0217(5)       | 0.0312(6)       | 0.0084(4)       | 0.0131(4)       | 0.0080(4)       |
| O2   | 0.0320(6)       | 0.0222(5)       | 0.0336(6)       | 0.0063(4)       | 0.0146(5)       | 0.0079(4)       |
| C1'  | 0.0231(8)       | 0.0228(7)       | 0.0282(7)       | 0.0063(6)       | 0.0060(6)       | 0.0087(6)       |
| C2'  | 0.0257(8)       | 0.0257(7)       | 0.0352(8)       | 0.0028(6)       | 0.0019(6)       | 0.0006(6)       |
| C3'  | 0.0330(9)       | 0.0329(8)       | 0.0245(7)       | -0.0005(6)      | 0.0022(6)       | 0.0068(7)       |
| C4'  | 0.0285(8)       | 0.0386(9)       | 0.0251(8)       | 0.0083(6)       | 0.0081(6)       | 0.0055(7)       |
| C5'  | 0.0271(8)       | 0.0363(8)       | 0.0309(8)       | 0.0061(7)       | 0.0039(6)       | -0.0045(7)      |
| C6'  | 0.0313(8)       | 0.0288(8)       | 0.0241(7)       | 0.0014(6)       | 0.0014(6)       | 0.0025(6)       |
| C7'  | 0.0275(8)       | 0.0275(7)       | 0.0339(8)       | 0.0098(6)       | 0.0122(6)       | 0.0078(6)       |
| C8'  | 0.0240(8)       | 0.0230(7)       | 0.0278(7)       | 0.0038(6)       | 0.0079(6)       | 0.0045(6)       |
| C9'  | 0.0256(8)       | 0.0175(6)       | 0.0235(7)       | -0.0003(5)      | 0.0013(6)       | 0.0010(6)       |
| O1'  | 0.0273(6)       | 0.0232(5)       | 0.0280(5)       | 0.0079(4)       | 0.0082(4)       | 0.0063(4)       |
| O2'  | 0.0309(6)       | 0.0230(5)       | 0.0313(5)       | 0.0064(4)       | 0.0129(4)       | 0.0083(4)       |

The form of the anisotropic displacement parameter is:  
 $\exp[-2\pi(a^2U_{11}h^2+b^2U_{22}k^2+c^2U_{33}l^2+2b^*c^*U_{23}kl+2a^*c^*U_{13}hl+2a^*b^*U_{12}hk)]$

**Table 5. Bond Distances in Compound 1359, Å**

|         |            |         |            |         |            |
|---------|------------|---------|------------|---------|------------|
| C1-C6   | 1.3812(19) | C1-C2   | 1.3919(19) | C1-C7   | 1.5090(19) |
| C2-C3   | 1.380(2)   | C3-C4   | 1.379(2)   | C4-C5   | 1.3778(19) |
| C5-C6   | 1.388(2)   | C7-C8   | 1.5182(18) | C8-C9   | 1.4917(19) |
| C9-O2   | 1.2175(16) | C9-O1   | 1.3204(16) | C1'-C6' | 1.385(2)   |
| C1'-C2' | 1.392(2)   | C1'-C7' | 1.508(2)   | C2'-C3' | 1.380(2)   |
| C3'-C4' | 1.379(2)   | C4'-C5' | 1.382(2)   | C5'-C6' | 1.382(2)   |
| C7'-C8' | 1.5283(18) | C8'-C9' | 1.4918(19) | C9'-O2' | 1.2181(17) |
| C9'-O1' | 1.3187(16) |         |            |         |            |

**Table 6. Bond Angles in Compound 1359, °**

|             |            |             |            |             |            |
|-------------|------------|-------------|------------|-------------|------------|
| C6-C1-C2    | 117.93(13) | C6-C1-C7    | 123.16(12) | C2-C1-C7    | 118.90(12) |
| C3-C2-C1    | 121.02(13) | C4-C3-C2    | 120.38(13) | C5-C4-C3    | 119.32(13) |
| C4-C5-C6    | 120.17(14) | C1-C6-C5    | 121.17(13) | C1-C7-C8    | 115.20(11) |
| C9-C8-C7    | 113.79(11) | O2-C9-O1    | 122.44(12) | O2-C9-C8    | 124.66(12) |
| O1-C9-C8    | 112.90(12) | C6'-C1'-C2' | 117.97(13) | C6'-C1'-C7' | 121.00(13) |
| C2'-C1'-C7' | 120.94(14) | C3'-C2'-C1' | 120.98(14) | C4'-C3'-C2' | 120.35(14) |
| C3'-C4'-C5' | 119.39(14) | C4'-C5'-C6' | 120.07(14) | C5'-C6'-C1' | 121.22(14) |
| C1'-C7'-C8' | 110.42(12) | C9'-C8'-C7' | 114.64(12) | O2'-C9'-O1' | 123.01(13) |
| O2'-C9'-C8' | 124.34(12) | O1'-C9'-C8' | 112.65(12) |             |            |

---

<sup>i</sup>Bruker (2009) SAINT. Bruker AXS Inc., Madison, Wisconsin, USA.

<sup>ii</sup>Bruker (2009) SHELXTL. Bruker AXS Inc., Madison, Wisconsin, USA.

<sup>iii</sup>Sheldrick, G.M. (2007) SADABS. University of Gottingen, Germany.

<sup>iv</sup>Sheldrick, G.M. (2008) Acta Cryst. A64,112-122.

<sup>v</sup>Sheldrick, G.M. (2008) Acta Cryst. A64,112-122.

<sup>vi</sup> $R1 = \sum |F_o| - |F_c| / \sum |F_o|$

$wR2 = [\sum w(F_o^2 - F_c^2)^2 / \sum w(F_o^2)]^{1/2}$

$GOF = [\sum w(F_o^2 - F_c^2)^2 / (n - p)]^{1/2}$

where n = the number of reflections and p = the number of parameters refined.

<sup>vii</sup>“ORTEP-II: A Fortran Thermal Ellipsoid Plot Program for Crystal Structure Illustrations”. C.K. Johnson (1976) ORNL-5138.



### X-ray Structure Determination of Compound 1417 (i.e., compound 2; CCDC 1427573)

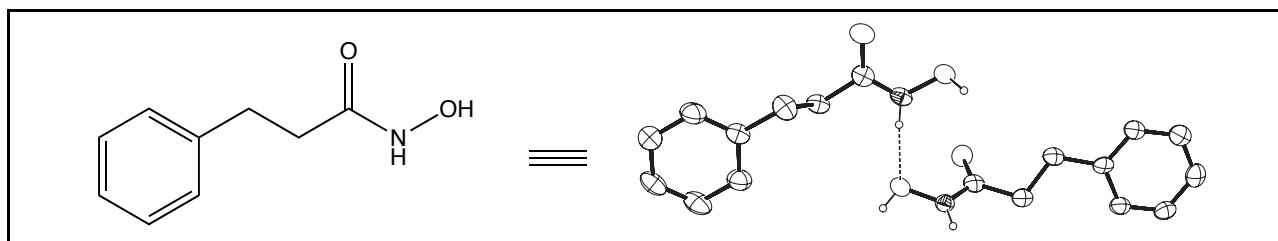

Compound 1417,  $C_9H_{11}NO_2$ , crystallizes in the monoclinic space group  $P2_1/c$  (systematic absences  $0k0$ :  $k=\text{odd}$  and  $h0l$ :  $l=\text{odd}$ ) with  $a=8.5765(7)\text{\AA}$ ,  $b=5.1612(4)\text{\AA}$ ,  $c=37.856(4)\text{\AA}$ ,  $\beta=90.365(4)^\circ$ ,  $V=1675.7(2)\text{\AA}^3$ ,  $Z=8$ , and  $d_{\text{calc}}=1.310\text{ g/cm}^3$ . X-ray intensity data were collected on a Bruker APEXII CCD area detector employing graphite-monochromated Mo- $K\alpha$  radiation ( $\lambda=0.71073\text{ \AA}$ ) at a temperature of 100(1)K. Preliminary indexing was performed from a series of thirty-six  $0.5^\circ$  rotation frames with exposures of 10 seconds. A total of 1371 frames were collected with a crystal to detector distance of 60.8 mm, rotation widths of  $0.5^\circ$  and exposures of 60 seconds:

| scan type | $2\theta$ | $\omega$ | $\phi$ | $\chi$ | frames |
|-----------|-----------|----------|--------|--------|--------|
| $\omega$  | -25.50    | 217.37   | 309.98 | 28.88  | 275    |
| $\omega$  | -25.50    | 202.56   | 341.46 | 55.93  | 305    |
| $\phi$    | -20.50    | 296.79   | 30.48  | 48.96  | 219    |
| $\omega$  | -0.50     | 27.39    | 20.96  | -51.77 | 188    |
| $\phi$    | -23.00    | 334.09   | 1.25   | -33.72 | 265    |
| $\omega$  | 2.00      | 319.34   | 206.86 | 88.14  | 119    |

Rotation frames were integrated using SAINT<sup>i</sup>, producing a listing of unaveraged  $F^2$  and  $\sigma(F^2)$  values which were then passed to the SHELXTL<sup>ii</sup> program package for further processing and structure solution. A total of 10212 reflections were measured over the ranges  $2.15 \leq \theta \leq 25.38^\circ$ ,  $-10 \leq h \leq 10$ ,  $-6 \leq k \leq 4$ ,  $-37 \leq l \leq 45$  yielding 3005 unique reflections ( $R_{\text{int}} = 0.0570$ ). The intensity data were corrected for Lorentz and polarization effects and for absorption using SADABS<sup>iii</sup> (minimum and maximum transmission 0.4563, 0.7452).

The structure was solved by direct methods (SHELXS-97<sup>iv</sup>). Refinement was by full-matrix least squares based on  $F^2$  using SHELXL-97.<sup>v</sup> All reflections were used during refinement. The weighting scheme used was  $w=1/[\sigma^2(F_o^2) + (0.0327P)^2 + 6.0713P]$  where  $P = (F_o^2 + 2F_c^2)/3$ . Non-hydrogen atoms

were refined anisotropically and hydrogen atoms were refined using a riding model. Refinement converged to  $R1=0.0952$  and  $wR2=0.2091$  for 2124 observed reflections for which  $F > 4\sigma(F)$  and  $R1=0.1263$  and  $wR2=0.2202$  and  $GOF = 1.188$  for all 3005 unique, non-zero reflections and 220 variables.<sup>vi</sup> The maximum  $\Delta/\sigma$  in the final cycle of least squares was 0.000 and the two most prominent peaks in the final difference Fourier were  $+0.331$  and  $-0.311 \text{ e}/\text{\AA}^3$ .

Table 1. lists cell information, data collection parameters, and refinement data. Final positional and equivalent isotropic thermal parameters are given in Tables 2. and 3. Anisotropic thermal parameters are in Table 4. Tables 5. and 6. list bond distances and bond angles. Figure 1. is an ORTEP<sup>vii</sup> representation of the molecule with 50% probability thermal ellipsoids displayed.

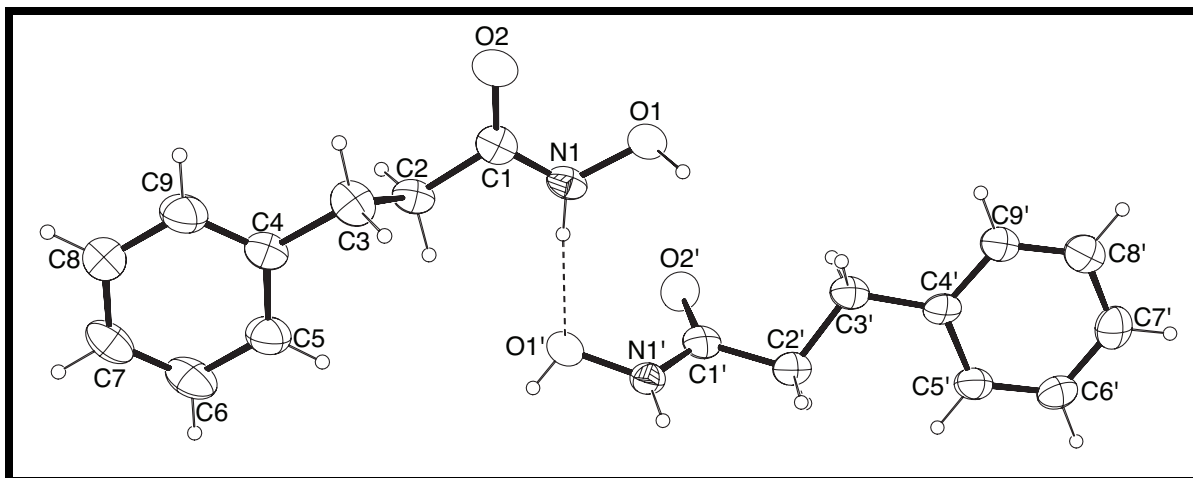

Figure 1. ORTEP drawing of the title compound with 50% probability thermal ellipsoids.

**Table 1. Summary of Structure Determination of Compound 1417**

|                                   |                                                |
|-----------------------------------|------------------------------------------------|
| Empirical formula                 | C <sub>9</sub> H <sub>11</sub> NO <sub>2</sub> |
| Formula weight                    | 165.19                                         |
| Temperature                       | 100(1) K                                       |
| Wavelength                        | 0.71073 Å                                      |
| Crystal system                    | monoclinic                                     |
| Space group                       | P2 <sub>1</sub> /c                             |
| Cell constants:                   |                                                |
| a                                 | 8.5765(7) Å                                    |
| b                                 | 5.1612(4) Å                                    |
| c                                 | 37.856(4) Å                                    |
| β                                 | 90.365(4)°                                     |
| Volume                            | 1675.7(2) Å <sup>3</sup>                       |
| Z                                 | 8                                              |
| Density (calculated)              | 1.310 Mg/m <sup>3</sup>                        |
| Absorption coefficient            | 0.093 mm <sup>-1</sup>                         |
| F(000)                            | 704                                            |
| Crystal size                      | 0.20 x 0.15 x 0.02 mm <sup>3</sup>             |
| Theta range for data collection   | 2.15 to 25.38°                                 |
| Index ranges                      | -10 ≤ h ≤ 10, -6 ≤ k ≤ 4, -37 ≤ l ≤ 45         |
| Reflections collected             | 10212                                          |
| Independent reflections           | 3005 [R(int) = 0.0570]                         |
| Completeness to theta = 25.38°    | 97.6 %                                         |
| Absorption correction             | Semi-empirical from equivalents                |
| Max. and min. transmission        | 0.7452 and 0.4563                              |
| Refinement method                 | Full-matrix least-squares on F <sup>2</sup>    |
| Data / restraints / parameters    | 3005 / 0 / 220                                 |
| Goodness-of-fit on F <sup>2</sup> | 1.188                                          |
| Final R indices [I > 2σ(I)]       | R1 = 0.0952, wR2 = 0.2091                      |
| R indices (all data)              | R1 = 0.1263, wR2 = 0.2202                      |
| Largest diff. peak and hole       | 0.331 and -0.311 e.Å <sup>-3</sup>             |

**Table 2. Refined Positional Parameters for Compound 1417**

| Atom | x         | y          | z           | $U_{eq}, \text{Å}^2$ |
|------|-----------|------------|-------------|----------------------|
| O1   | 0.8944(4) | 0.9256(6)  | 0.23598(9)  | 0.0330(8)            |
| O2   | 0.9621(4) | 1.0867(7)  | 0.30297(9)  | 0.0418(9)            |
| N1   | 0.8318(4) | 0.8159(8)  | 0.26626(10) | 0.0311(9)            |
| C1   | 0.8674(5) | 0.9027(10) | 0.29736(13) | 0.0324(12)           |
| C2   | 0.7830(5) | 0.7735(10) | 0.32740(13) | 0.0324(12)           |
| C3   | 0.8904(5) | 0.6900(12) | 0.35740(13) | 0.0411(13)           |
| C4   | 0.8041(5) | 0.5758(10) | 0.38820(13) | 0.0333(12)           |
| C5   | 0.7035(6) | 0.3669(11) | 0.38329(15) | 0.0458(14)           |
| C6   | 0.6269(6) | 0.2608(12) | 0.41135(16) | 0.0492(15)           |
| C7   | 0.6437(5) | 0.3537(11) | 0.44444(15) | 0.0431(14)           |
| C8   | 0.7417(7) | 0.5584(12) | 0.44991(15) | 0.0535(16)           |
| C9   | 0.8208(6) | 0.6683(12) | 0.42153(15) | 0.0488(15)           |
| O1'  | 0.6217(4) | 0.3952(7)  | 0.25521(9)  | 0.0356(9)            |
| O2'  | 0.5248(4) | 0.6359(7)  | 0.19716(9)  | 0.0385(9)            |
| N1'  | 0.6513(4) | 0.2997(8)  | 0.22191(10) | 0.0310(9)            |
| C1'  | 0.6078(5) | 0.4386(10) | 0.19438(13) | 0.0307(11)           |
| C2'  | 0.6587(5) | 0.3443(9)  | 0.15878(12) | 0.0314(11)           |
| C3'  | 0.7272(5) | 0.5640(10) | 0.13722(13) | 0.0325(11)           |
| C4'  | 0.7611(5) | 0.5105(9)  | 0.09899(13) | 0.0286(11)           |
| C5'  | 0.6948(5) | 0.3035(10) | 0.08032(14) | 0.0355(12)           |
| C6'  | 0.7198(6) | 0.2754(10) | 0.04457(14) | 0.0385(13)           |
| C7'  | 0.8136(6) | 0.4510(11) | 0.02650(14) | 0.0405(13)           |
| C8'  | 0.8813(5) | 0.6516(10) | 0.04486(14) | 0.0390(13)           |
| C9'  | 0.8563(5) | 0.6814(10) | 0.08043(13) | 0.0332(12)           |

$U_{eq} = \frac{1}{3}[U_{11}(aa^*)^2 + U_{22}(bb^*)^2 + U_{33}(cc^*)^2 + 2U_{12}aa^*bb^*\cos\gamma + 2U_{13}aa^*cc^*\cos\beta + 2U_{23}bb^*cc^*\cos\alpha]$

**Table 3. Positional Parameters for Hydrogens in Compound 1417**

| Atom | x      | y      | z      | $U_{iso}, \text{Å}^2$ |
|------|--------|--------|--------|-----------------------|
| H1   | 0.9406 | 0.8140 | 0.2247 | 0.044                 |
| H1a  | 0.7682 | 0.6879 | 0.2643 | 0.041                 |
| H2a  | 0.7283 | 0.6225 | 0.3184 | 0.043                 |
| H2b  | 0.7056 | 0.8924 | 0.3366 | 0.043                 |
| H3a  | 0.9637 | 0.5628 | 0.3486 | 0.055                 |
| H3b  | 0.9497 | 0.8389 | 0.3655 | 0.055                 |
| H5   | 0.6883 | 0.2991 | 0.3608 | 0.061                 |
| H6   | 0.5611 | 0.1202 | 0.4075 | 0.065                 |
| H7   | 0.5897 | 0.2798 | 0.4631 | 0.057                 |
| H8   | 0.7557 | 0.6247 | 0.4726 | 0.071                 |
| H9   | 0.8866 | 0.8086 | 0.4256 | 0.065                 |
| H1'  | 0.5699 | 0.2897 | 0.2663 | 0.047                 |
| H1a' | 0.6971 | 0.1529 | 0.2192 | 0.041                 |
| H2a' | 0.5699 | 0.2712 | 0.1463 | 0.042                 |
| H2b' | 0.7361 | 0.2088 | 0.1617 | 0.042                 |
| H3a' | 0.6558 | 0.7095 | 0.1383 | 0.043                 |
| H3b' | 0.8236 | 0.6180 | 0.1485 | 0.043                 |
| H5'  | 0.6333 | 0.1836 | 0.0922 | 0.047                 |
| H6'  | 0.6737 | 0.1384 | 0.0324 | 0.051                 |
| H7'  | 0.8301 | 0.4326 | 0.0024 | 0.054                 |
| H8'  | 0.9448 | 0.7686 | 0.0331 | 0.052                 |
| H9'  | 0.9038 | 0.8181 | 0.0924 | 0.044                 |

**Table 4. Refined Thermal Parameters (U's) for Compound 1417**

| Atom | U <sub>11</sub> | U <sub>22</sub> | U <sub>33</sub> | U <sub>23</sub> | U <sub>13</sub> | U <sub>12</sub> |
|------|-----------------|-----------------|-----------------|-----------------|-----------------|-----------------|
| O1   | 0.0260(17)      | 0.0298(19)      | 0.043(2)        | 0.0007(16)      | 0.0075(14)      | 0.0014(15)      |
| O2   | 0.0331(18)      | 0.042(2)        | 0.050(2)        | 0.0016(18)      | -0.0014(15)     | -0.0149(17)     |
| N1   | 0.0216(18)      | 0.027(2)        | 0.044(3)        | 0.005(2)        | 0.0039(17)      | 0.0002(17)      |
| C1   | 0.021(2)        | 0.034(3)        | 0.043(3)        | 0.004(2)        | 0.000(2)        | 0.006(2)        |
| C2   | 0.021(2)        | 0.030(3)        | 0.046(3)        | 0.003(2)        | 0.001(2)        | 0.000(2)        |
| C3   | 0.025(2)        | 0.051(3)        | 0.047(3)        | 0.006(3)        | -0.001(2)       | -0.002(2)       |
| C4   | 0.020(2)        | 0.035(3)        | 0.046(3)        | 0.004(2)        | 0.000(2)        | -0.002(2)       |
| C5   | 0.050(3)        | 0.040(3)        | 0.048(3)        | 0.003(3)        | -0.005(3)       | -0.011(3)       |
| C6   | 0.034(3)        | 0.051(4)        | 0.062(4)        | 0.016(3)        | -0.010(3)       | -0.019(3)       |
| C7   | 0.028(3)        | 0.044(3)        | 0.058(4)        | 0.019(3)        | 0.007(2)        | 0.000(2)        |
| C8   | 0.072(4)        | 0.045(4)        | 0.044(4)        | 0.001(3)        | 0.005(3)        | -0.006(3)       |
| C9   | 0.051(3)        | 0.043(3)        | 0.053(4)        | 0.004(3)        | -0.003(3)       | -0.017(3)       |
| O1'  | 0.0324(18)      | 0.035(2)        | 0.040(2)        | 0.0024(17)      | 0.0070(14)      | -0.0090(15)     |
| O2'  | 0.0318(18)      | 0.037(2)        | 0.047(2)        | -0.0005(17)     | 0.0065(15)      | 0.0129(16)      |
| N1'  | 0.030(2)        | 0.026(2)        | 0.037(2)        | -0.0010(19)     | 0.0065(17)      | -0.0007(17)     |
| C1'  | 0.017(2)        | 0.032(3)        | 0.044(3)        | -0.001(2)       | 0.0021(19)      | -0.005(2)       |
| C2'  | 0.021(2)        | 0.028(3)        | 0.045(3)        | -0.002(2)       | 0.0028(19)      | 0.003(2)        |
| C3'  | 0.023(2)        | 0.030(3)        | 0.045(3)        | 0.000(2)        | 0.002(2)        | -0.001(2)       |
| C4'  | 0.022(2)        | 0.020(2)        | 0.043(3)        | 0.000(2)        | 0.001(2)        | 0.0090(19)      |
| C5'  | 0.033(3)        | 0.027(3)        | 0.047(3)        | -0.001(2)       | 0.006(2)        | 0.000(2)        |
| C6'  | 0.041(3)        | 0.028(3)        | 0.046(3)        | -0.005(2)       | 0.000(2)        | 0.005(2)        |
| C7'  | 0.033(3)        | 0.045(3)        | 0.043(3)        | -0.002(3)       | 0.005(2)        | 0.013(3)        |
| C8'  | 0.030(3)        | 0.035(3)        | 0.052(4)        | 0.004(3)        | 0.005(2)        | 0.007(2)        |
| C9'  | 0.023(2)        | 0.030(3)        | 0.047(3)        | 0.001(2)        | 0.004(2)        | 0.002(2)        |

The form of the anisotropic displacement parameter is:

$$\exp[-2\pi(a^2U_{11}h^2+b^2U_{22}k^2+c^2U_{33}l^2+2b^*c^*U_{23}kl+2a^*c^*U_{13}hl+2a^*b^*U_{12}hk)]$$

**Table 5. Bond Distances in Compound 1417, Å**

|         |          |         |          |         |          |
|---------|----------|---------|----------|---------|----------|
| O1-N1   | 1.389(5) | O2-C1   | 1.266(6) | N1-C1   | 1.295(6) |
| C1-C2   | 1.508(7) | C2-C3   | 1.520(6) | C3-C4   | 1.505(7) |
| C4-C9   | 1.356(7) | C4-C5   | 1.393(7) | C5-C6   | 1.367(7) |
| C6-C7   | 1.348(8) | C7-C8   | 1.365(8) | C8-C9   | 1.395(8) |
| O1'-N1' | 1.379(5) | O2'-C1' | 1.248(6) | N1'-C1' | 1.317(6) |
| C1'-C2' | 1.500(7) | C2'-C3' | 1.518(6) | C3'-C4' | 1.503(6) |
| C4'-C9' | 1.395(6) | C4'-C5' | 1.399(7) | C5'-C6' | 1.379(7) |
| C6'-C7' | 1.394(7) | C7'-C8' | 1.373(7) | C8'-C9' | 1.373(7) |

**Table 6. Bond Angles in Compound 1417, °**

|             |          |             |          |             |          |
|-------------|----------|-------------|----------|-------------|----------|
| C1-N1-O1    | 121.3(4) | O2-C1-N1    | 124.0(5) | O2-C1-C2    | 121.1(4) |
| N1-C1-C2    | 114.9(4) | C1-C2-C3    | 113.4(4) | C4-C3-C2    | 113.0(4) |
| C9-C4-C5    | 117.3(5) | C9-C4-C3    | 122.3(5) | C5-C4-C3    | 120.5(5) |
| C6-C5-C4    | 120.4(5) | C7-C6-C5    | 122.0(5) | C6-C7-C8    | 118.6(5) |
| C7-C8-C9    | 120.0(6) | C4-C9-C8    | 121.7(5) | C1'-N1'-O1' | 118.4(4) |
| O2'-C1'-N1' | 122.5(5) | O2'-C1'-C2' | 120.7(4) | N1'-C1'-C2' | 116.9(4) |
| C1'-C2'-C3' | 110.9(4) | C4'-C3'-C2' | 117.3(4) | C9'-C4'-C5' | 117.7(5) |
| C9'-C4'-C3' | 119.1(4) | C5'-C4'-C3' | 123.1(4) | C6'-C5'-C4' | 120.7(5) |
| C5'-C6'-C7' | 120.4(5) | C8'-C7'-C6' | 119.0(5) | C9'-C8'-C7' | 120.8(5) |
| C8'-C9'-C4' | 121.2(5) |             |          |             |          |

---

<sup>i</sup>Bruker (2009) SAINT. Bruker AXS Inc., Madison, Wisconsin, USA.

<sup>ii</sup>Bruker (2009) SHELXTL. Bruker AXS Inc., Madison, Wisconsin, USA.

<sup>iii</sup>Sheldrick, G.M. (2007) SADABS. University of Gottingen, Germany.

<sup>iv</sup>Sheldrick, G.M. (2008) Acta Cryst. A64,112-122.

<sup>v</sup>Sheldrick, G.M. (2008) Acta Cryst. A64,112-122.

<sup>vi</sup> $R1 = \sum |F_o| - |F_c| / \sum |F_o|$

$wR2 = [\sum w(F_o^2 - F_c^2)^2 / \sum w(F_o^2)]^{1/2}$

$GOF = [\sum w(F_o^2 - F_c^2)^2 / (n - p)]^{1/2}$

where n = the number of reflections and p = the number of parameters refined.

<sup>vii</sup>“ORTEP-II: A Fortran Thermal Ellipsoid Plot Program for Crystal Structure Illustrations”. C.K. Johnson (1976) ORNL-5138.

### X-ray Structure Determination of Compound 1423 (i.e., compound 3; CCDC 1427548)

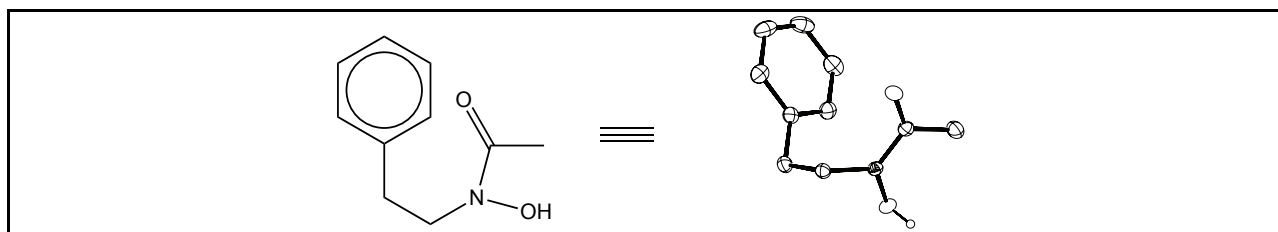

Compound 1423,  $C_{10}H_{13}NO_2$ , crystallizes in the monoclinic space group  $P2_1/c$  (systematic absences  $0k0$ :  $k=\text{odd}$  and  $h0l$ :  $l=\text{odd}$ ) with  $a=8.6640(6)\text{\AA}$ ,  $b=8.3228(6)\text{\AA}$ ,  $c=13.1502(10)\text{\AA}$ ,  $\beta=92.374(3)^\circ$ ,  $V=947.43(12)\text{\AA}^3$ ,  $Z=4$ , and  $d_{\text{calc}}=1.256\text{ g/cm}^3$ . X-ray intensity data were collected on a Bruker APEXII CCD area detector employing graphite-monochromated Mo- $K\alpha$  radiation ( $\lambda=0.71073\text{ \AA}$ ) at a temperature of  $100(1)\text{K}$ . Preliminary indexing was performed from a series of thirty-six  $0.5^\circ$  rotation frames with exposures of 10 seconds. A total of 2440 frames were collected with a crystal to detector distance of 37.4 mm, rotation widths of  $0.5^\circ$  and exposures of 20 seconds:

| scan type | $2\theta$ | $\omega$ | $\phi$ | $\chi$ | frames |
|-----------|-----------|----------|--------|--------|--------|
| $\phi$    | -23.00    | 315.83   | 12.48  | 28.88  | 739    |
| $\phi$    | -23.00    | 334.21   | 38.95  | 73.66  | 739    |
| $\phi$    | 19.50     | 59.55    | 348.86 | -26.26 | 722    |
| $\phi$    | -23.00    | 316.70   | 133.56 | 98.89  | 240    |

Rotation frames were integrated using SAINT<sup>i</sup>, producing a listing of unaveraged  $F^2$  and  $\sigma(F^2)$  values which were then passed to the SHELXTL<sup>ii</sup> program package for further processing and structure solution. A total of 16926 reflections were measured over the ranges  $2.35 \leq \theta \leq 25.42^\circ$ ,  $-10 \leq h \leq 10$ ,  $-10 \leq k \leq 9$ ,  $-15 \leq l \leq 15$  yielding 1748 unique reflections ( $R_{\text{int}} = 0.0166$ ). The intensity data were corrected for Lorentz and polarization effects and for absorption using SADABS<sup>iii</sup> (minimum and maximum transmission 0.7085, 0.7452).

The structure was solved by direct methods (SHELXS-97<sup>iv</sup>). Refinement was by full-matrix least squares based on  $F^2$  using SHELXL-97.<sup>v</sup> All reflections were used during refinement. The weighting scheme used was  $w=1/[\sigma^2(F_o^2) + (0.0343P)^2 + 0.45793P]$  where  $P = (F_o^2 + 2F_c^2)/3$ . Non-hydrogen atoms were refined anisotropically and hydrogen atoms were refined using a riding model. Refinement

converged to  $R1=0.0320$  and  $wR2=0.0792$  for 1607 observed reflections for which  $F > 4\sigma(F)$  and  $R1=0.0349$  and  $wR2=0.0822$  and  $GOF = 1.049$  for all 1748 unique, non-zero reflections and 121 variables.<sup>vi</sup> The maximum  $\Delta/\sigma$  in the final cycle of least squares was 0.000 and the two most prominent peaks in the final difference Fourier were  $+0.238$  and  $-0.276 \text{ e}/\text{\AA}^3$ .

Table 1. lists cell information, data collection parameters, and refinement data. Final positional and equivalent isotropic thermal parameters are given in Tables 2. and 3. Anisotropic thermal parameters are in Table 4. Tables 5. and 6. list bond distances and bond angles. Figure 1. is an ORTEP<sup>vii</sup> representation of the molecule with 50% probability thermal ellipsoids displayed.

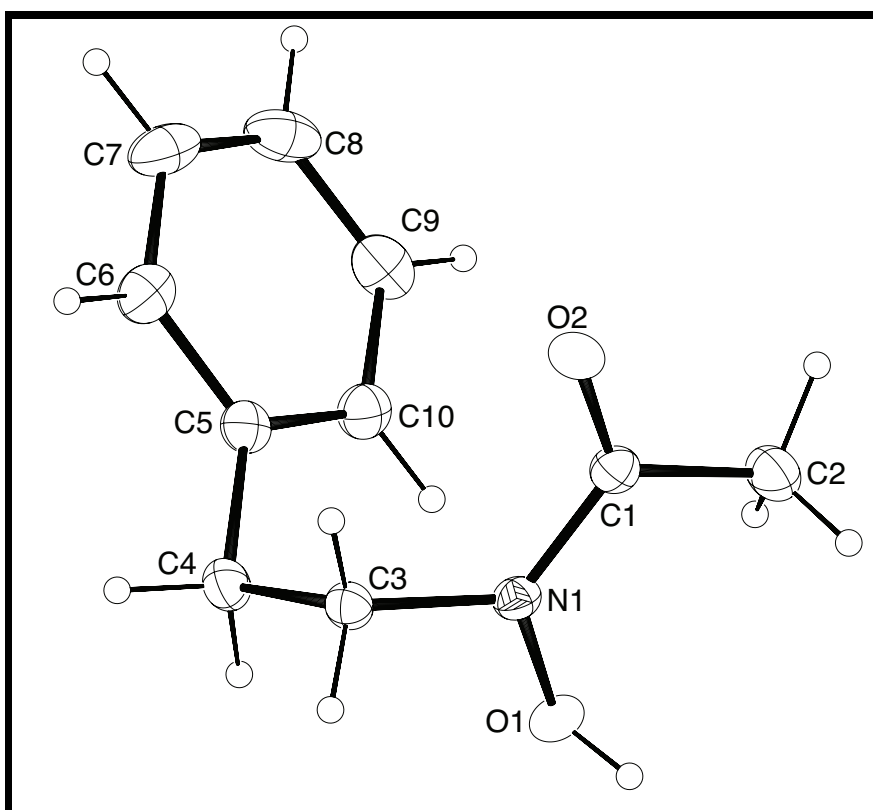

Figure 1. ORTEP drawing of the title compound with 50% probability thermal ellipsoids.



**Table 1. Summary of Structure Determination of Compound 1423**

|                                   |                                                 |
|-----------------------------------|-------------------------------------------------|
| Empirical formula                 | C <sub>10</sub> H <sub>13</sub> NO <sub>2</sub> |
| Formula weight                    | 179.21                                          |
| Temperature                       | 100(1) K                                        |
| Wavelength                        | 0.71073 Å                                       |
| Crystal system                    | monoclinic                                      |
| Space group                       | P2 <sub>1</sub> /c                              |
| Cell constants:                   |                                                 |
| a                                 | 8.6640(6) Å                                     |
| b                                 | 8.3228(6) Å                                     |
| c                                 | 13.1502(10) Å                                   |
| β                                 | 92.374(3)°                                      |
| Volume                            | 947.43(12) Å <sup>3</sup>                       |
| Z                                 | 4                                               |
| Density (calculated)              | 1.256 Mg/m <sup>3</sup>                         |
| Absorption coefficient            | 0.088 mm <sup>-1</sup>                          |
| F(000)                            | 384                                             |
| Crystal size                      | 0.38 x 0.25 x 0.15 mm <sup>3</sup>              |
| Theta range for data collection   | 2.35 to 25.42°                                  |
| Index ranges                      | -10 ≤ h ≤ 10, -10 ≤ k ≤ 9, -15 ≤ l ≤ 15         |
| Reflections collected             | 16926                                           |
| Independent reflections           | 1748 [R(int) = 0.0166]                          |
| Completeness to theta = 25.42°    | 99.9 %                                          |
| Absorption correction             | Semi-empirical from equivalents                 |
| Max. and min. transmission        | 0.7452 and 0.7085                               |
| Refinement method                 | Full-matrix least-squares on F <sup>2</sup>     |
| Data / restraints / parameters    | 1748 / 0 / 121                                  |
| Goodness-of-fit on F <sup>2</sup> | 1.049                                           |
| Final R indices [I > 2σ(I)]       | R1 = 0.0320, wR2 = 0.0792                       |
| R indices (all data)              | R1 = 0.0349, wR2 = 0.0822                       |
| Largest diff. peak and hole       | 0.238 and -0.276 e.Å <sup>-3</sup>              |

**Table 2. Refined Positional Parameters for Compound 1423**

| Atom | x           | y           | z           | $U_{eq}, \text{Å}^2$ |
|------|-------------|-------------|-------------|----------------------|
| O1   | 0.27233(9)  | 0.77609(9)  | 0.71540(6)  | 0.0187(2)            |
| O2   | 0.55728(9)  | 0.48436(10) | 0.68217(6)  | 0.0207(2)            |
| N1   | 0.38336(10) | 0.68293(11) | 0.66821(7)  | 0.0156(2)            |
| C1   | 0.46558(12) | 0.57620(13) | 0.72364(8)  | 0.0168(2)            |
| C2   | 0.44614(14) | 0.57778(15) | 0.83621(9)  | 0.0241(3)            |
| C3   | 0.36688(12) | 0.68271(13) | 0.55799(8)  | 0.0169(2)            |
| C4   | 0.21068(13) | 0.61616(14) | 0.51912(9)  | 0.0194(3)            |
| C5   | 0.18041(12) | 0.44719(14) | 0.55400(9)  | 0.0182(3)            |
| C6   | 0.20457(13) | 0.31584(15) | 0.49118(9)  | 0.0227(3)            |
| C7   | 0.17401(14) | 0.16097(15) | 0.52416(11) | 0.0282(3)            |
| C8   | 0.12057(14) | 0.13446(15) | 0.62032(11) | 0.0292(3)            |
| C9   | 0.09717(14) | 0.26390(16) | 0.68380(10) | 0.0263(3)            |
| C10  | 0.12619(13) | 0.41886(14) | 0.65076(9)  | 0.0212(3)            |

$U_{eq} = \frac{1}{3}[U_{11}(aa^*)^2 + U_{22}(bb^*)^2 + U_{33}(cc^*)^2 + 2U_{12}aa^*bb^*\cos\gamma + 2U_{13}aa^*cc^*\cos\beta + 2U_{23}bb^*cc^*\cos\alpha]$

**Table 3. Positional Parameters for Hydrogens in Compound 1423**

| Atom | x      | y      | z      | $U_{iso}, \text{Å}^2$ |
|------|--------|--------|--------|-----------------------|
| H1   | 0.3153 | 0.8483 | 0.7482 | 0.025                 |
| H2a  | 0.4839 | 0.4786 | 0.8651 | 0.036                 |
| H2b  | 0.3387 | 0.5898 | 0.8497 | 0.036                 |
| H2c  | 0.5034 | 0.6659 | 0.8660 | 0.036                 |
| H3a  | 0.4488 | 0.6183 | 0.5307 | 0.023                 |
| H3b  | 0.3783 | 0.7917 | 0.5332 | 0.023                 |
| H4a  | 0.1294 | 0.6856 | 0.5422 | 0.026                 |
| H4b  | 0.2064 | 0.6184 | 0.4453 | 0.026                 |
| H6   | 0.2415 | 0.3319 | 0.4266 | 0.030                 |
| H7   | 0.1897 | 0.0743 | 0.4812 | 0.037                 |
| H8   | 0.1005 | 0.0305 | 0.6421 | 0.039                 |
| H9   | 0.0619 | 0.2470 | 0.7488 | 0.035                 |
| H10  | 0.1092 | 0.5052 | 0.6938 | 0.028                 |

**Table 4. Refined Thermal Parameters (U's) for Compound 1423**

| Atom | $U_{11}$  | $U_{22}$  | $U_{33}$  | $U_{23}$   | $U_{13}$   | $U_{12}$   |
|------|-----------|-----------|-----------|------------|------------|------------|
| O1   | 0.0172(4) | 0.0162(4) | 0.0228(4) | -0.0052(3) | 0.0015(3)  | 0.0016(3)  |
| O2   | 0.0226(4) | 0.0188(4) | 0.0209(4) | 0.0017(3)  | 0.0021(3)  | 0.0059(3)  |
| N1   | 0.0152(4) | 0.0143(5) | 0.0172(5) | -0.0018(4) | 0.0013(3)  | 0.0015(3)  |
| C1   | 0.0166(5) | 0.0147(5) | 0.0191(6) | 0.0002(4)  | 0.0002(4)  | -0.0026(4) |
| C2   | 0.0289(6) | 0.0247(6) | 0.0187(6) | 0.0030(5)  | 0.0017(5)  | 0.0057(5)  |
| C3   | 0.0184(5) | 0.0156(5) | 0.0168(5) | 0.0016(4)  | -0.0001(4) | -0.0012(4) |
| C4   | 0.0190(5) | 0.0198(6) | 0.0189(5) | 0.0013(4)  | -0.0034(4) | -0.0003(5) |
| C5   | 0.0117(5) | 0.0196(6) | 0.0230(6) | -0.0002(5) | -0.0039(4) | -0.0013(4) |
| C6   | 0.0152(5) | 0.0256(6) | 0.0273(6) | -0.0043(5) | 0.0002(5)  | -0.0010(5) |
| C7   | 0.0189(6) | 0.0204(6) | 0.0450(8) | -0.0091(6) | -0.0006(5) | 0.0015(5)  |
| C8   | 0.0201(6) | 0.0189(6) | 0.0484(8) | 0.0064(6)  | -0.0032(5) | -0.0017(5) |
| C9   | 0.0210(6) | 0.0284(7) | 0.0294(7) | 0.0071(5)  | -0.0011(5) | -0.0040(5) |
| C10  | 0.0183(5) | 0.0216(6) | 0.0236(6) | -0.0016(5) | -0.0016(4) | -0.0015(5) |

The form of the anisotropic displacement parameter is:  
 $\exp[-2\pi(a^2U_{11}h^2 + b^2U_{22}k^2 + c^2U_{33}l^2 + 2b^*c^*U_{23}kl + 2a^*c^*U_{13}hl + 2a^*b^*U_{12}hk)]$

**Table 5. Bond Distances in Compound 1423, Å**

|        |            |       |            |        |            |
|--------|------------|-------|------------|--------|------------|
| O1-N1  | 1.4004(11) | O2-C1 | 1.2446(14) | N1-C1  | 1.3359(15) |
| N1-C3  | 1.4506(14) | C1-C2 | 1.4968(15) | C3-C4  | 1.5305(15) |
| C4-C5  | 1.5056(16) | C5-C6 | 1.3912(17) | C5-C10 | 1.3946(16) |
| C6-C7  | 1.3890(18) | C7-C8 | 1.382(2)   | C8-C9  | 1.3830(19) |
| C9-C10 | 1.3872(17) |       |            |        |            |

**Table 6. Bond Angles in Compound 1423, °**

|           |            |           |            |           |            |
|-----------|------------|-----------|------------|-----------|------------|
| C1-N1-O1  | 119.14(9)  | C1-N1-C3  | 124.93(9)  | O1-N1-C3  | 113.73(8)  |
| O2-C1-N1  | 120.33(10) | O2-C1-C2  | 122.60(10) | N1-C1-C2  | 117.03(10) |
| N1-C3-C4  | 112.53(9)  | C5-C4-C3  | 113.52(9)  | C6-C5-C10 | 118.27(11) |
| C6-C5-C4  | 121.38(10) | C10-C5-C4 | 120.36(10) | C7-C6-C5  | 120.56(12) |
| C8-C7-C6  | 120.61(12) | C7-C8-C9  | 119.40(12) | C8-C9-C10 | 120.14(12) |
| C9-C10-C5 | 121.01(11) |           |            |           |            |

---

<sup>i</sup>Bruker (2009) SAINT. Bruker AXS Inc., Madison, Wisconsin, USA.

<sup>ii</sup>Bruker (2009) SHELXTL. Bruker AXS Inc., Madison, Wisconsin, USA.

<sup>iii</sup>Sheldrick, G.M. (2007) SADABS. University of Gottingen, Germany.

<sup>iv</sup>Sheldrick, G.M. (2008) Acta Cryst. A64,112-122.

<sup>v</sup>Sheldrick, G.M. (2008) Acta Cryst. A64,112-122.

<sup>vi</sup> $R1 = \sum |F_o| - |F_c| / \sum |F_o|$

$wR2 = [\sum w(F_o^2 - F_c^2)^2 / \sum w(F_o^2)]^{1/2}$

$GOF = [\sum w(F_o^2 - F_c^2)^2 / (n - p)]^{1/2}$

where n = the number of reflections and p = the number of parameters refined.

<sup>vii</sup>“ORTEP-II: A Fortran Thermal Ellipsoid Plot Program for Crystal Structure Illustrations”. C.K. Johnson (1976) ORNL-5138.

### X-ray Structure Determination of Compound 1412 (i.e., compound 5; CCDC 1427579)

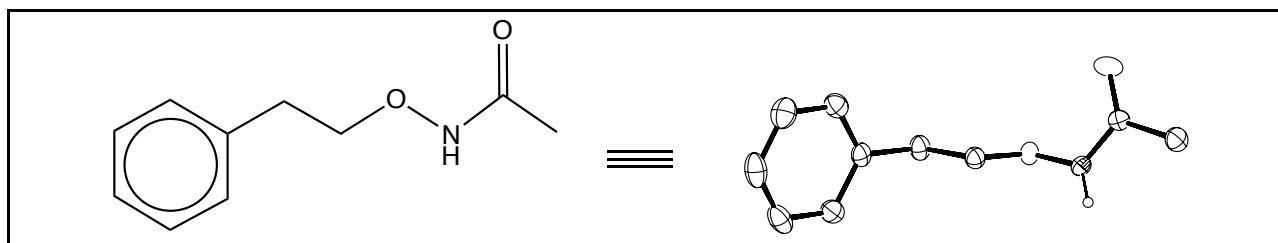

Compound 1412,  $C_{10}H_{13}NO_2$ , crystallizes in the monoclinic space group  $P2_1/c$  (systematic absences  $0k0$ :  $k=\text{odd}$  and  $h0l$ :  $l=\text{odd}$ ) with  $a=10.5867(7)\text{\AA}$ ,  $b=11.7808(9)\text{\AA}$ ,  $c=7.9426(6)\text{\AA}$ ,  $\beta=97.945(3)^\circ$ ,  $V=981.09(12)\text{\AA}^3$ ,  $Z=4$ , and  $d_{\text{calc}}=1.213\text{ g/cm}^3$ . X-ray intensity data were collected on a Bruker APEXII CCD area detector employing graphite-monochromated Mo- $K\alpha$  radiation ( $\lambda=0.71073\text{\AA}$ ) at a temperature of  $100(1)\text{K}$ . Preliminary indexing was performed from a series of thirty-six  $0.5^\circ$  rotation frames with exposures of 10 seconds. A total of 1159 frames were collected with a crystal to detector distance of 37.4 mm, rotation widths of  $0.5^\circ$  and exposures of 5 seconds:

| scan type | $2\theta$ | $\omega$ | $\phi$ | $\chi$ | frames |
|-----------|-----------|----------|--------|--------|--------|
| $\phi$    | 19.50     | 59.55    | 348.71 | -26.26 | 739    |
| $\omega$  | -10.50    | 345.67   | 80.80  | -60.33 | 122    |
| $\omega$  | -23.00    | 333.49   | 158.99 | -70.01 | 69     |
| $\omega$  | 17.00     | 321.08   | 318.36 | 83.36  | 117    |
| $\omega$  | 17.00     | 322.50   | 184.44 | 82.07  | 112    |

Rotation frames were integrated using SAINT<sup>i</sup>, producing a listing of unaveraged  $F^2$  and  $\sigma(F^2)$  values which were then passed to the SHELXTL<sup>ii</sup> program package for further processing and structure solution. A total of 10215 reflections were measured over the ranges  $1.94 \leq \theta \leq 25.42^\circ$ ,  $-12 \leq h \leq 12$ ,  $-14 \leq k \leq 14$ ,  $-9 \leq l \leq 9$  yielding 1800 unique reflections ( $R_{\text{int}} = 0.0186$ ). The intensity data were corrected for Lorentz and polarization effects and for absorption using SADABS<sup>iii</sup> (minimum and maximum transmission 0.7116, 0.7452).

The structure was solved by direct methods (SHELXS-97<sup>iv</sup>). Refinement was by full-matrix least squares based on  $F^2$  using SHELXL-97.<sup>v</sup> All reflections were used during refinement. The weighting scheme used was  $w=1/[\sigma^2(F_o^2) + (0.0501P)^2 + 0.4237P]$  where  $P = (F_o^2 + 2F_c^2)/3$ . Non-hydrogen atoms were refined anisotropically and hydrogen atoms were refined using a riding model. Refinement

converged to  $R1=0.0372$  and  $wR2=0.0992$  for 1613 observed reflections for which  $F > 4\sigma(F)$  and  $R1=0.0416$  and  $wR2=0.1025$  and  $GOF = 1.052$  for all 1800 unique, non-zero reflections and 120 variables.<sup>vi</sup> The maximum  $\Delta/\sigma$  in the final cycle of least squares was 0.000 and the two most prominent peaks in the final difference Fourier were  $+0.300$  and  $-0.288 \text{ e}/\text{\AA}^3$ .

Table 1. lists cell information, data collection parameters, and refinement data. Final positional and equivalent isotropic thermal parameters are given in Tables 2. and 3. Anisotropic thermal parameters are in Table 4. Tables 5. and 6. list bond distances and bond angles. Figure 1. is an ORTEP<sup>vii</sup> representation of the molecule with 50% probability thermal ellipsoids displayed.

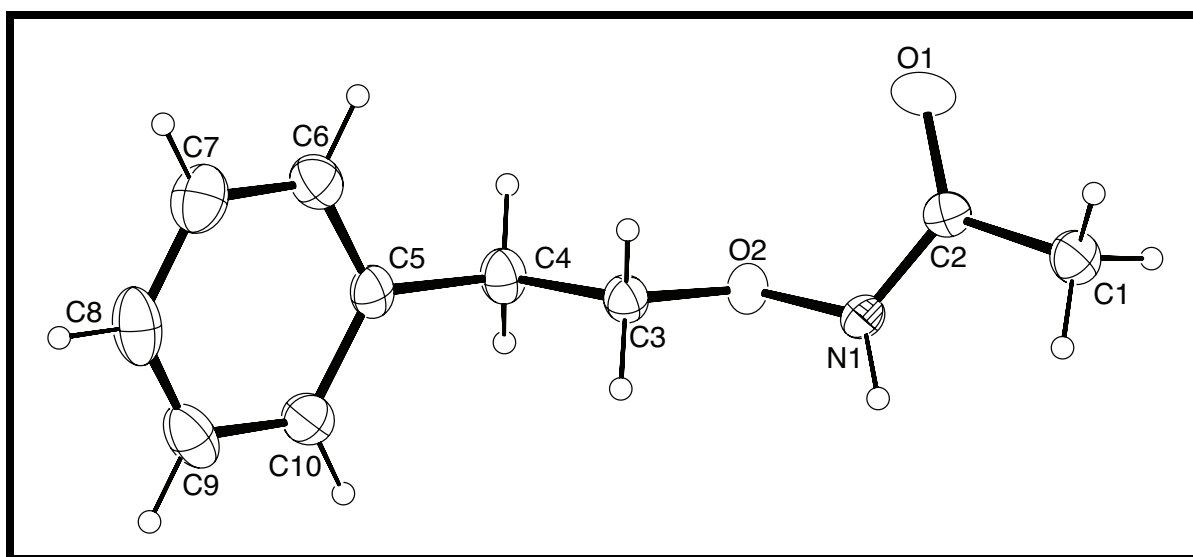

Figure 1. ORTEP drawing of the title compound with 50% probability thermal ellipsoids.

**Table 1. Summary of Structure Determination of Compound 1412**

|                                   |                                                 |
|-----------------------------------|-------------------------------------------------|
| Empirical formula                 | C <sub>10</sub> H <sub>13</sub> NO <sub>2</sub> |
| Formula weight                    | 179.21                                          |
| Temperature                       | 100(1) K                                        |
| Wavelength                        | 0.71073 Å                                       |
| Crystal system                    | monoclinic                                      |
| Space group                       | P2 <sub>1</sub> /c                              |
| Cell constants:                   |                                                 |
| a                                 | 10.5867(7) Å                                    |
| b                                 | 11.7808(9) Å                                    |
| c                                 | 7.9426(6) Å                                     |
| β                                 | 97.945(3)°                                      |
| Volume                            | 981.09(12) Å <sup>3</sup>                       |
| Z                                 | 4                                               |
| Density (calculated)              | 1.213 Mg/m <sup>3</sup>                         |
| Absorption coefficient            | 0.085 mm <sup>-1</sup>                          |
| F(000)                            | 384                                             |
| Crystal size                      | 0.50 x 0.15 x 0.10 mm <sup>3</sup>              |
| Theta range for data collection   | 1.94 to 25.42°                                  |
| Index ranges                      | -12 ≤ h ≤ 12, -14 ≤ k ≤ 14, -9 ≤ l ≤ 9          |
| Reflections collected             | 10215                                           |
| Independent reflections           | 1800 [R(int) = 0.0186]                          |
| Completeness to theta = 25.42°    | 99.8 %                                          |
| Absorption correction             | Semi-empirical from equivalents                 |
| Max. and min. transmission        | 0.7452 and 0.7116                               |
| Refinement method                 | Full-matrix least-squares on F <sup>2</sup>     |
| Data / restraints / parameters    | 1800 / 0 / 120                                  |
| Goodness-of-fit on F <sup>2</sup> | 1.052                                           |
| Final R indices [I > 2σ(I)]       | R1 = 0.0372, wR2 = 0.0992                       |
| R indices (all data)              | R1 = 0.0416, wR2 = 0.1025                       |
| Largest diff. peak and hole       | 0.300 and -0.288 e.Å <sup>-3</sup>              |

**Table 2. Refined Positional Parameters for Compound 1412**

| Atom | x            | y           | z           | $U_{eq}, \text{Å}^2$ |
|------|--------------|-------------|-------------|----------------------|
| O1   | 0.04931(10)  | 0.13263(8)  | 0.02719(12) | 0.0312(3)            |
| O2   | 0.16028(8)   | 0.32363(8)  | 0.15505(11) | 0.0233(2)            |
| N1   | 0.09860(11)  | 0.24769(10) | 0.25225(14) | 0.0262(3)            |
| C1   | -0.03391(14) | 0.08862(12) | 0.28568(17) | 0.0276(3)            |
| C2   | 0.04145(12)  | 0.15783(11) | 0.17563(16) | 0.0200(3)            |
| C3   | 0.29561(12)  | 0.31421(11) | 0.20418(16) | 0.0221(3)            |
| C4   | 0.35920(12)  | 0.40162(12) | 0.10469(17) | 0.0250(3)            |
| C5   | 0.50158(12)  | 0.39843(11) | 0.15748(16) | 0.0227(3)            |
| C6   | 0.57841(14)  | 0.32349(13) | 0.08237(18) | 0.0293(3)            |
| C7   | 0.70832(15)  | 0.31763(14) | 0.1370(2)   | 0.0374(4)            |
| C8   | 0.76343(14)  | 0.38640(14) | 0.2685(2)   | 0.0381(4)            |
| C9   | 0.68831(15)  | 0.46141(13) | 0.34363(19) | 0.0347(4)            |
| C10  | 0.55827(14)  | 0.46772(12) | 0.28837(17) | 0.0273(3)            |

$U_{eq} = \frac{1}{3}[U_{11}(aa^*)^2 + U_{22}(bb^*)^2 + U_{33}(cc^*)^2 + 2U_{12}aa^*bb^*\cos\gamma + 2U_{13}aa^*cc^*\cos\beta + 2U_{23}bb^*cc^*\cos\alpha]$

**Table 3. Positional Parameters for Hydrogens in Compound 1412**

| Atom | x       | y      | z       | $U_{iso}, \text{Å}^2$ |
|------|---------|--------|---------|-----------------------|
| H1   | 0.0978  | 0.2591 | 0.3590  | 0.035                 |
| H1a  | -0.1231 | 0.1045 | 0.2557  | 0.041                 |
| H1b  | -0.0081 | 0.1078 | 0.4029  | 0.041                 |
| H1c  | -0.0186 | 0.0094 | 0.2688  | 0.041                 |
| H3a  | 0.3243  | 0.2386 | 0.1794  | 0.029                 |
| H3b  | 0.3171  | 0.3279 | 0.3252  | 0.029                 |
| H4a  | 0.3398  | 0.3859 | -0.0160 | 0.033                 |
| H4b  | 0.3269  | 0.4766 | 0.1257  | 0.033                 |
| H6   | 0.5422  | 0.2767 | -0.0056 | 0.039                 |
| H7   | 0.7587  | 0.2673 | 0.0853  | 0.050                 |
| H8   | 0.8505  | 0.3820 | 0.3058  | 0.051                 |
| H9   | 0.7249  | 0.5080 | 0.4317  | 0.046                 |
| H10  | 0.5085  | 0.5189 | 0.3395  | 0.036                 |

**Table 4. Refined Thermal Parameters (U's) for Compound 1412**

| Atom | $U_{11}$  | $U_{22}$  | $U_{33}$   | $U_{23}$   | $U_{13}$   | $U_{12}$   |
|------|-----------|-----------|------------|------------|------------|------------|
| O1   | 0.0510(7) | 0.0258(6) | 0.0167(5)  | -0.0013(4) | 0.0045(4)  | -0.0072(4) |
| O2   | 0.0211(5) | 0.0280(5) | 0.0213(5)  | 0.0026(4)  | 0.0047(4)  | -0.0060(4) |
| N1   | 0.0302(6) | 0.0328(7) | 0.0177(6)  | -0.0031(5) | 0.0105(5)  | -0.0113(5) |
| C1   | 0.0312(7) | 0.0272(7) | 0.0242(7)  | 0.0041(6)  | 0.0036(6)  | -0.0051(6) |
| C2   | 0.0205(6) | 0.0209(6) | 0.0180(6)  | 0.0020(5)  | 0.0006(5)  | 0.0026(5)  |
| C3   | 0.0207(7) | 0.0242(7) | 0.0210(6)  | 0.0011(5)  | 0.0018(5)  | -0.0019(5) |
| C4   | 0.0228(7) | 0.0272(7) | 0.0244(7)  | 0.0059(5)  | 0.0014(5)  | -0.0031(5) |
| C5   | 0.0233(7) | 0.0239(7) | 0.0209(7)  | 0.0067(5)  | 0.0029(5)  | -0.0042(5) |
| C6   | 0.0307(8) | 0.0271(8) | 0.0297(8)  | 0.0003(6)  | 0.0024(6)  | -0.0032(6) |
| C7   | 0.0304(8) | 0.0356(9) | 0.0472(10) | 0.0059(7)  | 0.0085(7)  | 0.0061(6)  |
| C8   | 0.0221(7) | 0.0429(9) | 0.0465(10) | 0.0156(7)  | -0.0046(6) | -0.0036(6) |
| C9   | 0.0357(8) | 0.0365(9) | 0.0286(8)  | 0.0066(6)  | -0.0076(6) | -0.0121(7) |
| C10  | 0.0321(8) | 0.0268(7) | 0.0229(7)  | 0.0024(5)  | 0.0033(6)  | -0.0040(6) |

The form of the anisotropic displacement parameter is:  
 $\exp[-2\pi(a^2U_{11}h^2 + b^2U_{22}k^2 + c^2U_{33}l^2 + 2b^*c^*U_{23}kl + 2a^*c^*U_{13}hl + 2a^*b^*U_{12}hk)]$



**Table 5. Bond Distances in Compound 1412, Å**

|        |            |       |            |        |            |
|--------|------------|-------|------------|--------|------------|
| O1-C2  | 1.2297(16) | O2-N1 | 1.4008(14) | O2-C3  | 1.4362(15) |
| N1-C2  | 1.3249(17) | C1-C2 | 1.5026(18) | C3-C4  | 1.5116(18) |
| C4-C5  | 1.5082(18) | C5-C6 | 1.390(2)   | C5-C10 | 1.3910(19) |
| C6-C7  | 1.386(2)   | C7-C8 | 1.385(2)   | C8-C9  | 1.379(2)   |
| C9-C10 | 1.388(2)   |       |            |        |            |

**Table 6. Bond Angles in Compound 1412, °**

|           |            |           |            |           |            |
|-----------|------------|-----------|------------|-----------|------------|
| N1-O2-C3  | 108.93(9)  | C2-N1-O2  | 118.38(10) | O1-C2-N1  | 123.11(12) |
| O1-C2-C1  | 122.57(12) | N1-C2-C1  | 114.32(11) | O2-C3-C4  | 107.75(10) |
| C5-C4-C3  | 109.75(11) | C6-C5-C10 | 118.42(13) | C6-C5-C4  | 121.22(12) |
| C10-C5-C4 | 120.30(13) | C7-C6-C5  | 120.78(14) | C8-C7-C6  | 120.23(15) |
| C9-C8-C7  | 119.55(14) | C8-C9-C10 | 120.25(14) | C9-C10-C5 | 120.77(14) |

---

<sup>i</sup>Bruker (2009) SAINT. Bruker AXS Inc., Madison, Wisconsin, USA.

<sup>ii</sup>Bruker (2009) SHELXTL. Bruker AXS Inc., Madison, Wisconsin, USA.

<sup>iii</sup>Sheldrick, G.M. (2007) SADABS. University of Gottingen, Germany.

<sup>iv</sup>Sheldrick, G.M. (2008) Acta Cryst. A64,112-122.

<sup>v</sup>Sheldrick, G.M. (2008) Acta Cryst. A64,112-122.

<sup>vi</sup> $R1 = \sum |F_o| - |F_c| / \sum |F_o|$

$wR2 = [\sum w(F_o^2 - F_c^2)^2 / \sum w(F_o^2)]^{1/2}$

$GOF = [\sum w(F_o^2 - F_c^2)^2 / (n - p)]^{1/2}$

where n = the number of reflections and p = the number of parameters refined.

<sup>vii</sup>“ORTEP-II: A Fortran Thermal Ellipsoid Plot Program for Crystal Structure Illustrations”. C.K. Johnson (1976) ORNL-5138.

### X-ray Structure Determination of Compound 1392 (i.e., compound 6; CCDC 1427789)

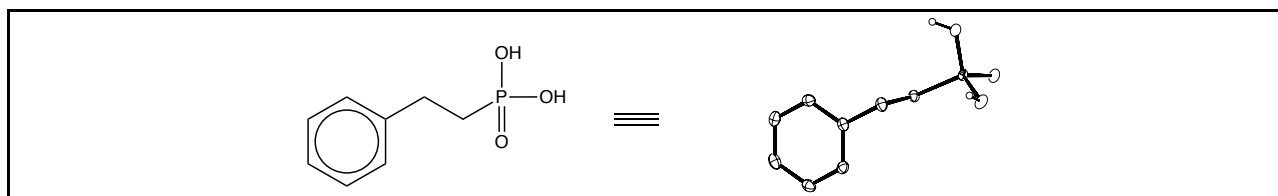

Compound 1392,  $C_8H_{11}PO_3$ , crystallizes in the monoclinic space group  $P2_1$  (systematic absences  $0k0: k=\text{odd}$ ) with  $a=5.5818(3)\text{\AA}$ ,  $b=7.5619(4)\text{\AA}$ ,  $c=10.4572(5)\text{\AA}$ ,  $\beta=103.324(2)^\circ$ ,  $V=429.51(4)\text{\AA}^3$ ,  $Z=2$ , and  $d_{\text{calc}}=1.439\text{ g/cm}^3$ . X-ray intensity data were collected on a Bruker APEXII CCD area detector employing graphite-monochromated Mo- $K\alpha$  radiation ( $\lambda=0.71073\text{ \AA}$ ) at a temperature of  $100(1)\text{K}$ . Preliminary indexing was performed from a series of thirty-six  $0.5^\circ$  rotation frames with exposures of 10 seconds. A total of 2541 frames were collected with a crystal to detector distance of 37.5 mm, rotation widths of  $0.5^\circ$  and exposures of 10 seconds:

| scan type | $2\theta$ | $\omega$ | $\phi$ | $\chi$ | frames |
|-----------|-----------|----------|--------|--------|--------|
| $\phi$    | -23.00    | 315.83   | 12.48  | 28.88  | 704    |
| $\omega$  | -23.00    | 333.49   | 158.99 | -70.01 | 69     |
| $\omega$  | 12.00     | 322.28   | 290.21 | 72.15  | 105    |
| $\omega$  | -20.50    | 19.29    | 178.64 | -31.86 | 105    |
| $\phi$    | 19.50     | 59.55    | 348.71 | -26.26 | 739    |
| $\phi$    | -23.00    | 334.21   | 38.95  | 73.66  | 739    |
| $\omega$  | -10.50    | 306.95   | 272.07 | 99.72  | 80     |

Rotation frames were integrated using SAINT<sup>i</sup>, producing a listing of unaveraged  $F^2$  and  $\sigma(F^2)$  values which were then passed to the SHELXTL<sup>ii</sup> program package for further processing and structure solution. A total of 9150 reflections were measured over the ranges  $2.00 \leq \theta \leq 25.35^\circ$ ,  $-6 \leq h \leq 6$ ,  $-9 \leq k \leq 9$ ,  $-12 \leq l \leq 12$  yielding 1563 unique reflections ( $R_{\text{int}} = 0.0179$ ). The intensity data were corrected for Lorentz and polarization effects and for absorption using SADABS<sup>iii</sup> (minimum and maximum transmission 0.6974, 0.7452).

The structure was solved by direct methods (SHELXS-97<sup>iv</sup>). Refinement was by full-matrix least squares based on  $F^2$  using SHELXL-97.<sup>v</sup> All reflections were used during refinement. The weighting scheme used was  $w=1/[\sigma^2(F_o^2) + (0.0205P)^2 + 0.1314P]$  where  $P = (F_o^2 + 2F_c^2)/3$ . Non-hydrogen atoms

were refined anisotropically and hydrogen atoms were refined using a riding model. Refinement converged to  $R1=0.0171$  and  $wR2=0.0463$  for 1562 observed reflections for which  $F > 4\sigma(F)$  and  $R1=0.0171$  and  $wR2=0.0463$  and  $GOF = 1.129$  for all 1563 unique, non-zero reflections and 112 variables.<sup>vi</sup> The maximum  $\Delta/\sigma$  in the final cycle of least squares was 0.000 and the two most prominent peaks in the final difference Fourier were  $+0.211$  and  $-0.175 e/\text{\AA}^3$ . The molecule is hydrogen-bonded to two neighboring molecules as shown in the drawing below:

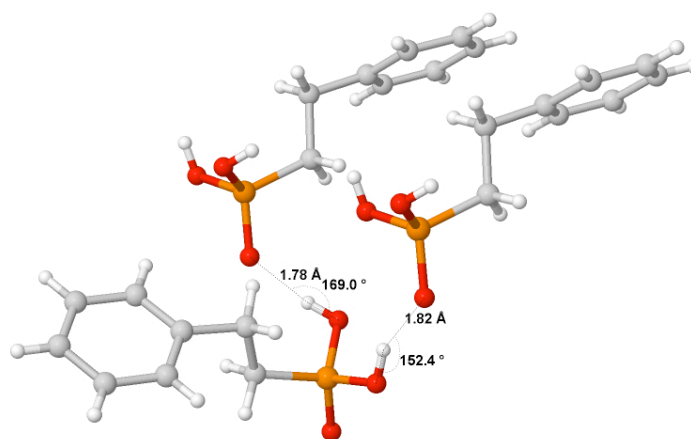

Table 1. lists cell information, data collection parameters, and refinement data. Final positional and equivalent isotropic thermal parameters are given in Tables 2. and 3. Anisotropic thermal parameters are in Table 4. Tables 5. and 6. list bond distances and bond angles. Figure 1. is an ORTEP<sup>vii</sup> representation of the molecule with 50% probability thermal ellipsoids displayed.

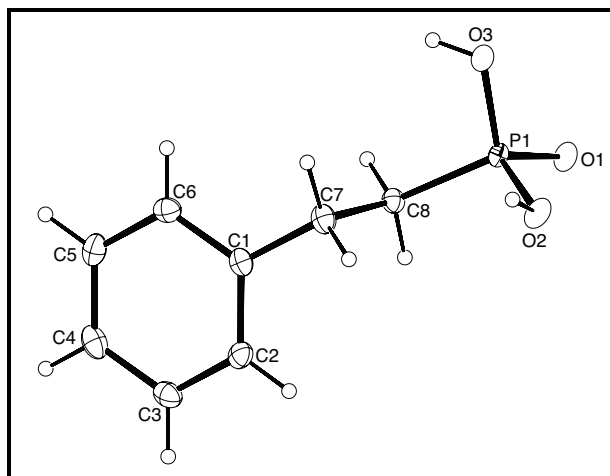

Figure 1. ORTEP drawing of the title compound with 50% probability thermal ellipsoids.

**Table 1. Summary of Structure Determination of Compound 1392**

|                                   |                                                |
|-----------------------------------|------------------------------------------------|
| Empirical formula                 | C <sub>8</sub> H <sub>11</sub> PO <sub>3</sub> |
| Formula weight                    | 186.14                                         |
| Temperature                       | 100(1) K                                       |
| Wavelength                        | 0.71073 Å                                      |
| Crystal system                    | monoclinic                                     |
| Space group                       | P2 <sub>1</sub>                                |
| Cell constants:                   |                                                |
| a                                 | 5.5818(3) Å                                    |
| b                                 | 7.5619(4) Å                                    |
| c                                 | 10.4572(5) Å                                   |
| β                                 | 103.324(2)°                                    |
| Volume                            | 429.51(4) Å <sup>3</sup>                       |
| Z                                 | 2                                              |
| Density (calculated)              | 1.439 Mg/m <sup>3</sup>                        |
| Absorption coefficient            | 0.282 mm <sup>-1</sup>                         |
| F(000)                            | 196                                            |
| Crystal size                      | 0.35 x 0.24 x 0.08 mm <sup>3</sup>             |
| Theta range for data collection   | 2.00 to 25.35°                                 |
| Index ranges                      | -6 ≤ h ≤ 6, -9 ≤ k ≤ 9, -12 ≤ l ≤ 12           |
| Reflections collected             | 9150                                           |
| Independent reflections           | 1563 [R(int) = 0.0179]                         |
| Completeness to theta = 25.35°    | 99.2 %                                         |
| Absorption correction             | Semi-empirical from equivalents                |
| Max. and min. transmission        | 0.7452 and 0.6974                              |
| Refinement method                 | Full-matrix least-squares on F <sup>2</sup>    |
| Data / restraints / parameters    | 1563 / 1 / 112                                 |
| Goodness-of-fit on F <sup>2</sup> | 1.129                                          |
| Final R indices [I > 2σ(I)]       | R1 = 0.0171, wR2 = 0.0463                      |
| R indices (all data)              | R1 = 0.0171, wR2 = 0.0463                      |
| Absolute structure parameter      | 0.05(7)                                        |
| Largest diff. peak and hole       | 0.211 and -0.175 e.Å <sup>-3</sup>             |

**Table 2. Refined Positional Parameters for Compound 1392**

| Atom | x           | y            | z           | $U_{eq}, \text{Å}^2$ |
|------|-------------|--------------|-------------|----------------------|
| C1   | 0.7053(3)   | 0.43808(18)  | 0.62098(13) | 0.0134(3)            |
| C2   | 0.5431(3)   | 0.36236(18)  | 0.51283(14) | 0.0157(3)            |
| C3   | 0.5886(3)   | 0.37566(19)  | 0.38812(14) | 0.0176(3)            |
| C4   | 0.7939(3)   | 0.46620(19)  | 0.36936(14) | 0.0186(3)            |
| C5   | 0.9546(3)   | 0.54277(19)  | 0.47620(14) | 0.0177(3)            |
| C6   | 0.9107(2)   | 0.52866(18)  | 0.60122(14) | 0.0157(3)            |
| C7   | 0.6633(3)   | 0.41141(18)  | 0.75764(14) | 0.0161(3)            |
| C8   | 0.7652(3)   | 0.22973(17)  | 0.80947(13) | 0.0129(3)            |
| O1   | 0.78496(17) | -0.02376(12) | 0.99438(10) | 0.0150(2)            |
| O2   | 0.44370(16) | 0.19093(13)  | 0.97077(9)  | 0.0158(2)            |
| O3   | 0.87027(18) | 0.29459(13)  | 1.07246(9)  | 0.0157(2)            |
| P1   | 0.71895(5)  | 0.16770(4)   | 0.96696(3)  | 0.01080(9)           |

$U_{eq} = \frac{1}{3}[U_{11}(aa^*)^2 + U_{22}(bb^*)^2 + U_{33}(cc^*)^2 + 2U_{12}aa^*bb^*\cos\gamma + 2U_{13}aa^*cc^*\cos\beta + 2U_{23}bb^*cc^*\cos\alpha]$

**Table 3. Positional Parameters for Hydrogens in Compound 1392**

| Atom | x      | y      | z      | $U_{iso}, \text{Å}^2$ |
|------|--------|--------|--------|-----------------------|
| H2   | 0.4040 | 0.3027 | 0.5245 | 0.021                 |
| H3   | 0.4809 | 0.3237 | 0.3169 | 0.023                 |
| H4   | 0.8237 | 0.4755 | 0.2857 | 0.025                 |
| H5   | 1.0923 | 0.6038 | 0.4640 | 0.024                 |
| H6   | 1.0195 | 0.5801 | 0.6723 | 0.021                 |
| H7a  | 0.4887 | 0.4175 | 0.7550 | 0.021                 |
| H7b  | 0.7459 | 0.5039 | 0.8157 | 0.021                 |
| H8a  | 0.9406 | 0.2283 | 0.8137 | 0.017                 |
| H8b  | 0.6897 | 0.1406 | 0.7462 | 0.017                 |
| H2a  | 0.4159 | 0.2955 | 0.9821 | 0.024                 |
| H3a  | 0.9714 | 0.3480 | 1.0413 | 0.024                 |

**Table 4. Refined Thermal Parameters (U's) for Compound 1392**

| Atom | U <sub>11</sub> | U <sub>22</sub> | U <sub>33</sub> | U <sub>23</sub> | U <sub>13</sub> | U <sub>12</sub> |
|------|-----------------|-----------------|-----------------|-----------------|-----------------|-----------------|
| C1   | 0.0156(6)       | 0.0095(6)       | 0.0152(7)       | 0.0023(5)       | 0.0041(5)       | 0.0048(5)       |
| C2   | 0.0153(7)       | 0.0116(6)       | 0.0194(7)       | 0.0020(6)       | 0.0027(6)       | -0.0001(5)      |
| C3   | 0.0217(7)       | 0.0136(7)       | 0.0153(7)       | 0.0000(5)       | -0.0002(6)      | 0.0023(6)       |
| C4   | 0.0265(8)       | 0.0156(8)       | 0.0153(7)       | 0.0019(5)       | 0.0084(6)       | 0.0052(6)       |
| C5   | 0.0160(7)       | 0.0155(7)       | 0.0236(8)       | 0.0039(6)       | 0.0084(6)       | 0.0010(5)       |
| C6   | 0.0148(7)       | 0.0134(7)       | 0.0173(7)       | -0.0001(5)      | 0.0005(5)       | 0.0018(5)       |
| C7   | 0.0202(7)       | 0.0131(7)       | 0.0159(7)       | 0.0009(5)       | 0.0060(5)       | 0.0022(5)       |
| C8   | 0.0144(6)       | 0.0130(6)       | 0.0119(6)       | -0.0003(5)      | 0.0044(5)       | 0.0001(5)       |
| O1   | 0.0130(5)       | 0.0120(5)       | 0.0213(5)       | 0.0023(4)       | 0.0066(4)       | 0.0006(4)       |
| O2   | 0.0138(4)       | 0.0102(5)       | 0.0252(5)       | -0.0015(4)      | 0.0080(4)       | 0.0003(4)       |
| O3   | 0.0181(5)       | 0.0161(5)       | 0.0142(5)       | -0.0009(4)      | 0.0062(4)       | -0.0047(4)      |
| P1   | 0.01088(15)     | 0.00919(15)     | 0.01306(15)     | 0.00027(14)     | 0.00429(10)     | -0.00019(14)    |

The form of the anisotropic displacement parameter is:  
 $\exp[-2\pi(a^2U_{11}h^2+b^2U_{22}k^2+c^2U_{33}l^2+2b^*c^*U_{23}kl+2a^*c^*U_{13}hl+2a^*b^*U_{12}hk)]$

**Table 5. Bond Distances in Compound 1392, Å**

|       |            |       |            |       |            |
|-------|------------|-------|------------|-------|------------|
| C1-C6 | 1.3915(19) | C1-C2 | 1.3978(19) | C1-C7 | 1.5139(18) |
| C2-C3 | 1.388(2)   | C3-C4 | 1.387(2)   | C4-C5 | 1.388(2)   |
| C5-C6 | 1.389(2)   | C7-C8 | 1.5371(18) | C8-P1 | 1.7874(13) |
| O1-P1 | 1.5051(9)  | O2-P1 | 1.5560(9)  | O3-P1 | 1.5562(10) |

**Table 6. Bond Angles in Compound 1392, °**

|          |            |          |            |          |            |
|----------|------------|----------|------------|----------|------------|
| C6-C1-C2 | 118.92(13) | C6-C1-C7 | 121.18(12) | C2-C1-C7 | 119.80(13) |
| C3-C2-C1 | 120.39(13) | C4-C3-C2 | 120.29(13) | C3-C4-C5 | 119.59(13) |
| C4-C5-C6 | 120.28(13) | C5-C6-C1 | 120.53(13) | C1-C7-C8 | 109.08(11) |
| C7-C8-P1 | 116.06(9)  | O1-P1-O2 | 107.67(5)  | O1-P1-O3 | 112.89(6)  |
| O2-P1-O3 | 106.86(5)  | O1-P1-C8 | 110.30(6)  | O2-P1-C8 | 110.31(6)  |
| O3-P1-C8 | 108.74(6)  |          |            |          |            |



---

<sup>i</sup>Bruker (2009) SAINT. Bruker AXS Inc., Madison, Wisconsin, USA.

<sup>ii</sup>Bruker (2009) SHELXTL. Bruker AXS Inc., Madison, Wisconsin, USA.

<sup>iii</sup>Sheldrick, G.M. (2007) SADABS. University of Gottingen, Germany.

<sup>iv</sup>Sheldrick, G.M. (2008) Acta Cryst. A64,112-122.

<sup>v</sup>Sheldrick, G.M. (2008) Acta Cryst. A64,112-122.

<sup>vi</sup> $R1 = \sum |F_o| - |F_c| / \sum |F_o|$

$wR2 = [\sum w(F_o^2 - F_c^2)^2 / \sum w(F_o^2)]^{1/2}$

$GOF = [\sum w(F_o^2 - F_c^2)^2 / (n - p)]^{1/2}$

where n = the number of reflections and p = the number of parameters refined.

<sup>vii</sup>“ORTEP-II: A Fortran Thermal Ellipsoid Plot Program for Crystal Structure Illustrations”. C.K. Johnson (1976) ORNL-5138.

### X-ray Structure Determination of Compound 1401 (i.e., compound 8; CCDC 1427589)

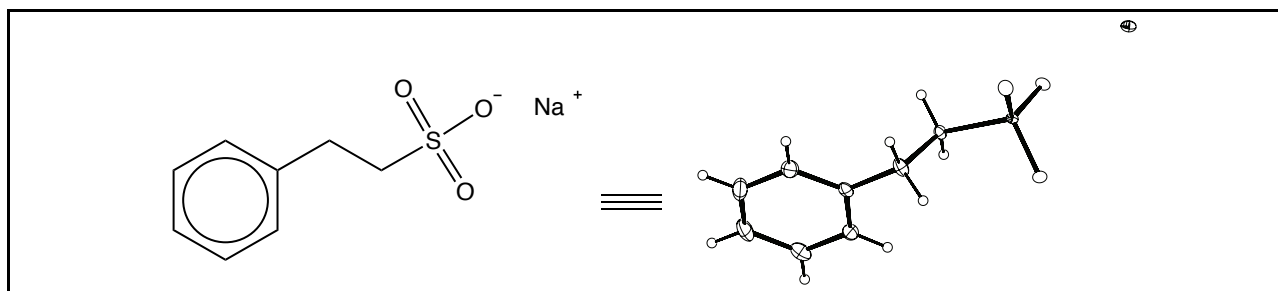

Compound 1401,  $C_8H_{12}SO_4Cl_2Na_2$ , crystallizes in the triclinic space group  $P\bar{1}$  with  $a=6.0118(3)\text{\AA}$ ,  $b=8.0508(4)\text{\AA}$ ,  $c=18.6019(10)\text{\AA}$ ,  $\alpha=82.918(2)^\circ$ ,  $\beta=87.785(2)^\circ$ ,  $\gamma=89.956(2)^\circ$ ,  $V=892.78(8)\text{\AA}^3$ ,  $Z=4$ , and  $d_{\text{calc}}=2.389\text{ g/cm}^3$ . X-ray intensity data were collected on a Bruker APEXII CCD area detector employing graphite-monochromated Mo-K $\alpha$  radiation ( $\lambda=0.71073\text{ \AA}$ ) at a temperature of 100(1)K. Preliminary indexing was performed from a series of thirty-six  $0.5^\circ$  rotation frames with exposures of 10 seconds. A total of 2221 frames were collected with a crystal to detector distance of 37.4 mm, rotation widths of  $0.5^\circ$  and exposures of 5 seconds:

| scan type | $2\theta$ | $\omega$ | $\phi$ | $\chi$ | frames |
|-----------|-----------|----------|--------|--------|--------|
| $\phi$    | -15.50    | 258.48   | 8.28   | 19.46  | 739    |
| $\omega$  | -10.50    | 306.95   | 272.07 | 99.72  | 80     |
| $\phi$    | -20.50    | 342.55   | 321.55 | -73.06 | 496    |
| $\phi$    | -23.00    | 315.83   | 12.48  | 28.88  | 739    |
| $\omega$  | 17.00     | 333.38   | 184.44 | 82.07  | 91     |
| $\omega$  | 17.00     | 341.19   | 318.36 | 83.36  | 76     |

Rotation frames were integrated using SAINT<sup>i</sup>, producing a listing of unaveraged  $F^2$  and  $\sigma(F^2)$  values which were then passed to the SHELXTL<sup>ii</sup> program package for further processing and structure solution. A total of 17811 reflections were measured over the ranges  $2.21 \leq \theta \leq 25.39^\circ$ ,  $-7 \leq h \leq 7$ ,  $-9 \leq k \leq 9$ ,  $-22 \leq l \leq 22$  yielding 3277 unique reflections ( $R_{\text{int}} = 0.0310$ ). The intensity data were corrected for Lorentz and polarization effects and for absorption using SADABS<sup>iii</sup> (minimum and maximum transmission 0.6495, 0.7452).

The structure was solved by direct methods (SHELXS-97<sup>iv</sup>). Refinement was by full-matrix least squares based on  $F^2$  using SHELXL-97.<sup>v</sup> All reflections were used during refinement. The weighting

scheme used was  $w=1/[\sigma^2(F_o^2) + (0.0483P)^2 + 0.8076P]$  where  $P = (F_o^2 + 2F_c^2)/3$ . Non-hydrogen atoms were refined anisotropically and hydrogen atoms were refined using a riding model. Refinement converged to  $R1=0.0313$  and  $wR2=0.0835$  for 3100 observed reflections for which  $F > 4\sigma(F)$  and  $R1=0.0329$  and  $wR2=0.0854$  and  $GOF = 1.053$  for all 3277 unique, non-zero reflections and 236 variables.<sup>vi</sup> The maximum  $\Delta/\sigma$  in the final cycle of least squares was 0.001 and the two most prominent peaks in the final difference Fourier were  $+0.745$  and  $-0.532 \text{ e}/\text{\AA}^3$ .

Table 1. lists cell information, data collection parameters, and refinement data. Final positional and equivalent isotropic thermal parameters are given in Tables 2. and 3. Anisotropic thermal parameters are in Table 4. Tables 5. and 6. list bond distances and bond angles. Figures 1. and 2. are ORTEP<sup>vii</sup> representations of the molecule with 50% probability thermal ellipsoids displayed.

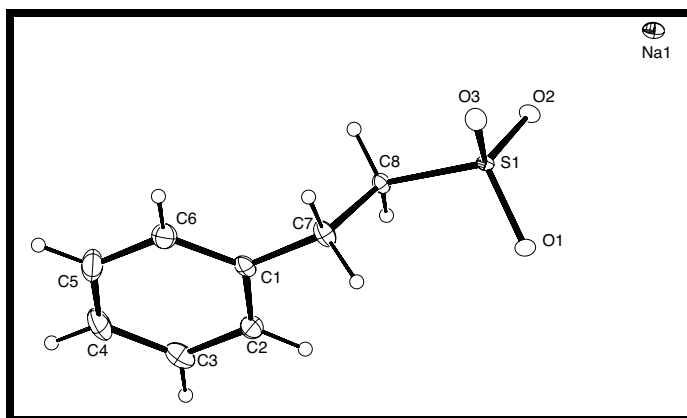

Figure 1. ORTEP drawing of molecule no. 1 of the asymmetric unit with 50% probability thermal ellipsoids.

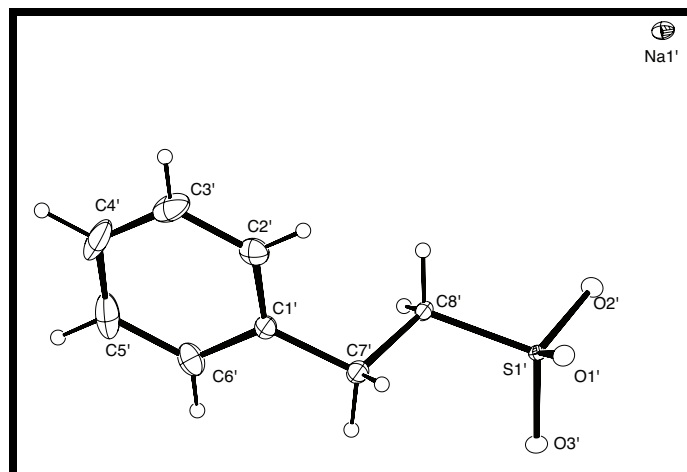

Figure 2. ORTEP drawing of molecule no. 2 of the asymmetric unit with 50% probability thermal ellipsoids.

**Table 1. Summary of Structure Determination of Compound 1401**

|                                   |                                                                                |
|-----------------------------------|--------------------------------------------------------------------------------|
| Empirical formula                 | C <sub>8</sub> H <sub>12</sub> SO <sub>4</sub> Cl <sub>2</sub> Na <sub>2</sub> |
| Formula weight                    | 321.12                                                                         |
| Temperature                       | 100(1) K                                                                       |
| Wavelength                        | 0.71073 Å                                                                      |
| Crystal system                    | triclinic                                                                      |
| Space group                       | P $\bar{1}$                                                                    |
| Cell constants:                   |                                                                                |
| a                                 | 6.0118(3) Å                                                                    |
| b                                 | 8.0508(4) Å                                                                    |
| c                                 | 18.6019(10) Å                                                                  |
| $\alpha$                          | 82.918(2)°                                                                     |
| $\beta$                           | 87.785(2)°                                                                     |
| $\gamma$                          | 89.956(2)°                                                                     |
| Volume                            | 892.78(8) Å <sup>3</sup>                                                       |
| Z                                 | 4                                                                              |
| Density (calculated)              | 2.389 Mg/m <sup>3</sup>                                                        |
| Absorption coefficient            | 1.053 mm <sup>-1</sup>                                                         |
| F(000)                            | 656                                                                            |
| Crystal size                      | 0.32 x 0.28 x 0.04 mm <sup>3</sup>                                             |
| Theta range for data collection   | 2.21 to 25.39°                                                                 |
| Index ranges                      | -7 ≤ h ≤ 7, -9 ≤ k ≤ 9, -22 ≤ l ≤ 22                                           |
| Reflections collected             | 17811                                                                          |
| Independent reflections           | 3277 [R(int) = 0.0310]                                                         |
| Completeness to theta = 25.39°    | 99.7 %                                                                         |
| Absorption correction             | Semi-empirical from equivalents                                                |
| Max. and min. transmission        | 0.7452 and 0.6495                                                              |
| Refinement method                 | Full-matrix least-squares on F <sup>2</sup>                                    |
| Data / restraints / parameters    | 3277 / 0 / 236                                                                 |
| Goodness-of-fit on F <sup>2</sup> | 1.053                                                                          |
| Final R indices [I > 2σ(I)]       | R1 = 0.0313, wR2 = 0.0835                                                      |
| R indices (all data)              | R1 = 0.0329, wR2 = 0.0854                                                      |
| Largest diff. peak and hole       | 0.745 and -0.532 e.Å <sup>-3</sup>                                             |

**Table 2. Refined Positional Parameters for Compound 1401**

| Atom | x           | y            | z           | $U_{eq}, \text{Å}^2$ |
|------|-------------|--------------|-------------|----------------------|
| C1   | 0.0878(3)   | 0.6241(2)    | 0.20965(9)  | 0.0113(3)            |
| C2   | -0.1216(3)  | 0.5478(2)    | 0.21939(10) | 0.0143(4)            |
| C3   | -0.2424(3)  | 0.5164(2)    | 0.16053(10) | 0.0187(4)            |
| C4   | -0.1571(3)  | 0.5639(2)    | 0.09063(10) | 0.0214(4)            |
| C5   | 0.0479(3)   | 0.6430(2)    | 0.08032(10) | 0.0219(4)            |
| C6   | 0.1705(3)   | 0.6727(2)    | 0.13937(10) | 0.0164(4)            |
| C7   | 0.2204(3)   | 0.6504(2)    | 0.27478(9)  | 0.0133(4)            |
| C8   | 0.2881(3)   | 0.4828(2)    | 0.31617(9)  | 0.0091(3)            |
| O1   | 0.20495(18) | 0.56718(14)  | 0.44461(6)  | 0.0092(2)            |
| O2   | 0.45246(18) | 0.33502(14)  | 0.43376(6)  | 0.0095(2)            |
| O3   | 0.57544(19) | 0.62217(14)  | 0.39280(6)  | 0.0108(3)            |
| S1   | 0.39110(6)  | 0.50262(5)   | 0.40280(2)  | 0.00626(12)          |
| Na1  | 0.63621(10) | 0.16907(8)   | 0.52918(3)  | 0.00880(16)          |
| C1'  | 0.5903(3)   | 0.0381(2)    | 0.20953(9)  | 0.0122(3)            |
| C2'  | 0.3812(3)   | 0.1113(2)    | 0.21422(10) | 0.0175(4)            |
| C3'  | 0.2739(3)   | 0.1758(2)    | 0.15260(12) | 0.0266(5)            |
| C4'  | 0.3734(4)   | 0.1654(3)    | 0.08502(12) | 0.0322(5)            |
| C5'  | 0.5798(4)   | 0.0906(3)    | 0.07942(11) | 0.0291(5)            |
| C6'  | 0.6882(3)   | 0.0270(2)    | 0.14139(10) | 0.0188(4)            |
| C7'  | 0.7086(3)   | -0.0253(2)   | 0.27757(10) | 0.0167(4)            |
| C8'  | 0.7862(3)   | 0.1198(2)    | 0.31631(8)  | 0.0092(3)            |
| O1'  | 0.70525(18) | -0.03536(14) | 0.44530(6)  | 0.0094(2)            |
| O2'  | 0.95320(18) | 0.20307(14)  | 0.43332(6)  | 0.0094(2)            |
| O3'  | 1.07490(19) | -0.06170(14) | 0.39286(6)  | 0.0109(3)            |
| S1'  | 0.89072(6)  | 0.05252(5)   | 0.40293(2)  | 0.00638(12)          |
| Na1' | 0.86362(10) | 0.68558(8)   | 0.47097(3)  | 0.00875(16)          |

$U_{eq} = \frac{1}{3}[U_{11}(aa^*)^2 + U_{22}(bb^*)^2 + U_{33}(cc^*)^2 + 2U_{12}aa^*bb^*\cos\gamma + 2U_{13}aa^*cc^*\cos\beta + 2U_{23}bb^*cc^*\cos\alpha]$

**Table 3. Positional Parameters for Hydrogens in Compound 1401**

| Atom | x       | y       | z      | $U_{iso}, \text{Å}^2$ |
|------|---------|---------|--------|-----------------------|
| H2   | -0.1809 | 0.5176  | 0.2661 | 0.019                 |
| H3   | -0.3804 | 0.4636  | 0.1679 | 0.025                 |
| H4   | -0.2372 | 0.5426  | 0.0510 | 0.028                 |
| H5   | 0.1042  | 0.6765  | 0.0335 | 0.029                 |
| H6   | 0.3084  | 0.7255  | 0.1318 | 0.022                 |
| H7a  | 0.1317  | 0.7129  | 0.3068 | 0.018                 |
| H7b  | 0.3528  | 0.7157  | 0.2589 | 0.018                 |
| H8a  | 0.4018  | 0.4320  | 0.2877 | 0.012                 |
| H8b  | 0.1600  | 0.4085  | 0.3220 | 0.012                 |
| H2'  | 0.3127  | 0.1169  | 0.2595 | 0.023                 |
| H3'  | 0.1354  | 0.2260  | 0.1566 | 0.035                 |
| H4'  | 0.3017  | 0.2086  | 0.0434 | 0.043                 |
| H5'  | 0.6462  | 0.0830  | 0.0339 | 0.039                 |
| H6'  | 0.8267  | -0.0232 | 0.1373 | 0.025                 |
| H7a' | 0.8362  | -0.0914 | 0.2651 | 0.022                 |
| H7b' | 0.6089  | -0.0971 | 0.3098 | 0.022                 |
| H8a' | 0.6623  | 0.1950  | 0.3218 | 0.012                 |
| H8b' | 0.9017  | 0.1819  | 0.2865 | 0.012                 |

**Table 4. Refined Thermal Parameters (U's) for Compound 1401**

| Atom | U <sub>11</sub> | U <sub>22</sub> | U <sub>33</sub> | U <sub>23</sub> | U <sub>13</sub> | U <sub>12</sub> |
|------|-----------------|-----------------|-----------------|-----------------|-----------------|-----------------|
| C1   | 0.0139(8)       | 0.0074(8)       | 0.0129(8)       | -0.0013(6)      | -0.0034(7)      | 0.0036(6)       |
| C2   | 0.0151(9)       | 0.0136(8)       | 0.0139(8)       | -0.0004(7)      | -0.0007(7)      | 0.0019(7)       |
| C3   | 0.0152(9)       | 0.0172(9)       | 0.0239(10)      | -0.0017(7)      | -0.0069(7)      | 0.0000(7)       |
| C4   | 0.0270(10)      | 0.0213(10)      | 0.0173(9)       | -0.0048(7)      | -0.0118(8)      | 0.0033(8)       |
| C5   | 0.0296(11)      | 0.0243(10)      | 0.0114(9)       | -0.0004(7)      | -0.0007(8)      | 0.0030(8)       |
| C6   | 0.0159(9)       | 0.0160(9)       | 0.0167(9)       | 0.0001(7)       | -0.0001(7)      | 0.0000(7)       |
| C7   | 0.0179(9)       | 0.0083(8)       | 0.0140(8)       | -0.0010(6)      | -0.0059(7)      | 0.0004(6)       |
| C8   | 0.0106(8)       | 0.0086(8)       | 0.0086(8)       | -0.0022(6)      | -0.0024(6)      | 0.0002(6)       |
| O1   | 0.0084(6)       | 0.0087(6)       | 0.0108(6)       | -0.0027(4)      | 0.0000(4)       | 0.0013(4)       |
| O2   | 0.0090(6)       | 0.0079(6)       | 0.0116(6)       | -0.0007(4)      | -0.0017(4)      | 0.0017(4)       |
| O3   | 0.0097(6)       | 0.0105(6)       | 0.0121(6)       | -0.0011(4)      | -0.0014(4)      | -0.0040(4)      |
| S1   | 0.0056(2)       | 0.0054(2)       | 0.0080(2)       | -0.00129(14)    | -0.00097(14)    | -0.00023(14)    |
| Na1  | 0.0066(3)       | 0.0078(3)       | 0.0123(3)       | -0.0026(2)      | -0.0009(2)      | 0.0002(2)       |
| C1'  | 0.0154(8)       | 0.0081(8)       | 0.0134(8)       | -0.0019(6)      | -0.0046(7)      | -0.0030(6)      |
| C2'  | 0.0163(9)       | 0.0147(9)       | 0.0224(10)      | -0.0052(7)      | -0.0025(7)      | -0.0024(7)      |
| C3'  | 0.0212(10)      | 0.0191(10)      | 0.0409(13)      | -0.0039(9)      | -0.0179(9)      | 0.0027(8)       |
| C4'  | 0.0454(14)      | 0.0233(11)      | 0.0275(11)      | 0.0065(9)       | -0.0257(10)     | -0.0064(9)      |
| C5'  | 0.0408(13)      | 0.0336(12)      | 0.0126(9)       | -0.0019(8)      | -0.0012(9)      | -0.0159(10)     |
| C6'  | 0.0178(9)       | 0.0221(10)      | 0.0178(9)       | -0.0072(7)      | 0.0001(7)       | -0.0053(7)      |
| C7'  | 0.0261(10)      | 0.0093(8)       | 0.0157(9)       | -0.0031(7)      | -0.0099(7)      | 0.0020(7)       |
| C8'  | 0.0109(8)       | 0.0082(8)       | 0.0084(8)       | -0.0001(6)      | -0.0028(6)      | 0.0008(6)       |
| O1'  | 0.0087(6)       | 0.0083(5)       | 0.0110(6)       | -0.0002(4)      | -0.0004(4)      | -0.0016(4)      |
| O2'  | 0.0092(6)       | 0.0073(6)       | 0.0123(6)       | -0.0027(4)      | -0.0019(4)      | -0.0014(4)      |
| O3'  | 0.0098(6)       | 0.0115(6)       | 0.0117(6)       | -0.0025(4)      | -0.0014(4)      | 0.0049(4)       |
| S1'  | 0.0059(2)       | 0.0054(2)       | 0.0079(2)       | -0.00103(14)    | -0.00117(14)    | 0.00043(14)     |
| Na1' | 0.0066(3)       | 0.0075(3)       | 0.0122(3)       | -0.0009(2)      | -0.0008(2)      | 0.0001(2)       |

The form of the anisotropic displacement parameter is:

$$\exp[-2\pi(a^2U_{11}h^2+b^2U_{22}k^2+c^2U_{33}l^2+2b^*c^*U_{23}kl+2a^*c^*U_{13}hl+2a^*b^*U_{12}hk)]$$

Table 5. Bond Distances in Compound 1401, Å

|            |            |            |            |            |            |
|------------|------------|------------|------------|------------|------------|
| C1-C6      | 1.390(2)   | C1-C2      | 1.397(2)   | C1-C7      | 1.512(2)   |
| C2-C3      | 1.386(3)   | C3-C4      | 1.388(3)   | C4-C5      | 1.383(3)   |
| C5-C6      | 1.391(3)   | C7-C8      | 1.532(2)   | C8-S1      | 1.7738(16) |
| O1-S1      | 1.4692(12) | O1-Na1#1   | 2.3226(13) | O1-Na1#2   | 2.4373(13) |
| O1-Na1#2   | 2.4398(12) | O2-S1      | 1.4534(11) | O2-Na1     | 2.3918(13) |
| O2-Na1#2   | 2.5390(13) | O3-S1      | 1.4597(12) | O3-Na1'    | 2.3991(13) |
| O3-Na1#2   | 2.6468(13) | S1-Na1#2   | 3.0003(7)  | S1-Na1#2   | 3.0695(7)  |
| Na1-O1#3   | 2.3239(13) | Na1-O3#4   | 2.3979(13) | Na1-O1'    | 2.4285(13) |
| Na1-O1#2   | 2.4398(12) | Na1-O2'    | 2.5503(13) | Na1-O3#2   | 2.6468(13) |
| Na1-S1'    | 3.0001(7)  | Na1-S1#2   | 3.0695(7)  | Na1-Na1#2  | 3.2238(9)  |
| Na1-Na1#5  | 3.2272(9)  | Na1-Na1#3  | 3.4849(12) | C1'-C6'    | 1.390(3)   |
| C1'-C2'    | 1.392(3)   | C1'-C7'    | 1.509(2)   | C2'-C3'    | 1.382(3)   |
| C3'-C4'    | 1.383(3)   | C4'-C5'    | 1.385(3)   | C5'-C6'    | 1.388(3)   |
| C7'-C8'    | 1.529(2)   | C8'-S1'    | 1.7740(16) | O1'-S1'    | 1.4700(12) |
| O1'-Na1#3  | 2.3239(12) | O1'-Na1#6  | 2.4391(13) | O2'-S1'    | 1.4546(11) |
| O2'-Na1#5  | 2.3943(13) | O3'-S1'    | 1.4600(12) | O3'-Na1#4  | 2.3979(13) |
| O3'-Na1#6  | 2.6451(13) | S1'-Na1#6  | 3.0690(7)  | Na1'-O1#7  | 2.3226(13) |
| Na1'-O2#5  | 2.3943(13) | Na1'-O1#2  | 2.4373(13) | Na1'-O1#8  | 2.4391(13) |
| Na1'-O2#2  | 2.5390(13) | Na1'-O3#8  | 2.6451(13) | Na1'-S1#2  | 3.0003(7)  |
| Na1'-S1#8  | 3.0690(7)  | Na1'-Na1#2 | 3.2238(9)  | Na1'-Na1#5 | 3.2272(9)  |
| Na1'-Na1#5 | 3.4811(12) |            |            |            |            |

Symmetry transformations used to generate equivalent atoms:

#1 x-1,y,z #2 -x+1,-y+1,-z+1 #3 -x+1,-y,-z+1

#4 -x+2,-y,-z+1 #5 -x+2,-y+1,-z+1 #6 x,y-1,z

#7 x+1,y,z #8 x,y+1,z



Table 6. Bond Angles in Compound 1401, °

|                 |            |                 |            |                 |            |
|-----------------|------------|-----------------|------------|-----------------|------------|
| C6-C1-C2        | 118.58(16) | C6-C1-C7        | 121.45(16) | C2-C1-C7        | 119.96(15) |
| C3-C2-C1        | 121.01(17) | C2-C3-C4        | 119.87(17) | C5-C4-C3        | 119.62(17) |
| C4-C5-C6        | 120.55(17) | C1-C6-C5        | 120.35(17) | C1-C7-C8        | 111.05(13) |
| C7-C8-S1        | 113.16(11) | S1-O1-Na1#1     | 160.24(7)  | S1-O1-Na1#2     | 97.24(6)   |
| Na1#1-O1-Na1#2  | 93.97(4)   | S1-O1-Na1#2     | 100.53(6)  | Na1#1-O1-Na1#2  | 85.28(4)   |
| Na1#2-O1-Na1#2  | 127.40(5)  | S1-O2-Na1       | 146.26(7)  | S1-O2-Na1#2     | 93.44(6)   |
| Na1-O2-Na1#2    | 81.60(4)   | S1-O3-Na1'      | 132.22(7)  | S1-O3-Na1#2     | 92.12(6)   |
| Na1'-O3-Na1#2   | 79.25(4)   | O2-S1-O3        | 114.41(7)  | O2-S1-O1        | 111.18(7)  |
| O3-S1-O1        | 110.85(7)  | O2-S1-C8        | 106.24(7)  | O3-S1-C8        | 107.82(7)  |
| O1-S1-C8        | 105.82(7)  | O2-S1-Na1#2     | 57.64(5)   | O3-S1-Na1#2     | 136.37(5)  |
| O1-S1-Na1#2     | 53.69(5)   | C8-S1-Na1#2     | 115.60(6)  | O2-S1-Na1#2     | 130.65(5)  |
| O3-S1-Na1#2     | 59.51(5)   | O1-S1-Na1#2     | 51.39(5)   | C8-S1-Na1#2     | 122.55(6)  |
| Na1#2-S1-Na1#2  | 92.16(2)   | O1#3-Na1-O2     | 85.67(4)   | O1#3-Na1-O3#4   | 114.07(5)  |
| O2-Na1-O3#4     | 160.26(5)  | O1#3-Na1-O1'    | 85.70(4)   | O2-Na1-O1'      | 87.48(4)   |
| O3#4-Na1-O1'    | 93.26(4)   | O1#3-Na1-O1#2   | 134.59(5)  | O2-Na1-O1#2     | 85.63(4)   |
| O3#4-Na1-O1#2   | 80.69(4)   | O1'-Na1-O1#2    | 138.20(5)  | O1#3-Na1-O2'    | 141.31(5)  |
| O2-Na1-O2'      | 80.38(4)   | O3#4-Na1-O2'    | 83.31(4)   | O1'-Na1-O2'     | 57.96(4)   |
| O1#2-Na1-O2'    | 80.24(4)   | O1#3-Na1-O3#2   | 78.20(4)   | O2-Na1-O3#2     | 81.20(4)   |
| O3#4-Na1-O3#2   | 102.58(4)  | O1'-Na1-O3#2    | 160.91(5)  | O1#2-Na1-O3#2   | 56.43(4)   |
| O2'-Na1-O3#2    | 133.85(4)  | O1#3-Na1-S1'    | 113.45(4)  | O2-Na1-S1'      | 81.66(3)   |
| O3#4-Na1-S1'    | 89.44(3)   | O1'-Na1-S1'     | 29.06(3)   | O1#2-Na1-S1'    | 109.17(3)  |
| O2'-Na1-S1'     | 28.96(3)   | O3#2-Na1-S1'    | 158.39(4)  | O1#3-Na1-S1#2   | 106.52(4)  |
| O2-Na1-S1#2     | 81.76(3)   | O3#4-Na1-S1#2   | 92.48(3)   | O1'-Na1-S1#2    | 162.94(4)  |
| O1#2-Na1-S1#2   | 28.07(3)   | O2'-Na1-S1#2    | 106.90(3)  | O3#2-Na1-S1#2   | 28.37(3)   |
| S1'-Na1-S1#2    | 135.09(2)  | O1#3-Na1-Na1#2  | 48.93(3)   | O2-Na1-Na1#2    | 51.18(3)   |
| O3#4-Na1-Na1#2  | 143.20(4)  | O1'-Na1-Na1#2   | 114.19(4)  | O1#2-Na1-Na1#2  | 92.75(3)   |
| O2'-Na1-Na1#2   | 131.52(4)  | O3#2-Na1-Na1#2  | 46.98(3)   | S1'-Na1-Na1#2   | 126.49(2)  |
| S1#2-Na1-Na1#2  | 68.597(18) | O1#3-Na1-Na1#5  | 167.22(4)  | O2-Na1-Na1#5    | 106.67(4)  |
| O3#4-Na1-Na1#5  | 53.67(3)   | O1'-Na1-Na1#5   | 97.94(3)   | O1#2-Na1-Na1#5  | 45.83(3)   |
| O2'-Na1-Na1#5   | 47.19(3)   | O3#2-Na1-Na1#5  | 100.00(3)  | S1'-Na1-Na1#5   | 72.589(19) |
| S1#2-Na1-Na1#5  | 72.794(18) | Na1#2-Na1-Na1#5 | 137.47(3)  | O1#3-Na1-Na1#3  | 44.02(3)   |
| O2-Na1-Na1#3    | 85.35(4)   | O3#4-Na1-Na1#3  | 108.16(4)  | O1'-Na1-Na1#3   | 41.68(3)   |
| O1#2-Na1-Na1#3  | 170.97(4)  | O2'-Na1-Na1#3   | 98.67(4)   | O3#2-Na1-Na1#3  | 121.48(4)  |
| S1'-Na1-Na1#3   | 69.89(2)   | S1#2-Na1-Na1#3  | 148.85(3)  | Na1#2-Na1-Na1#3 | 81.22(2)   |
| Na1#5-Na1-Na1#3 | 138.30(3)  | C6'-C1'-C2'     | 118.80(17) | C6'-C1'-C7'     | 121.01(16) |
| C2'-C1'-C7'     | 120.19(16) | C3'-C2'-C1'     | 121.04(18) | C2'-C3'-C4'     | 119.76(19) |
| C3'-C4'-C5'     | 119.89(18) | C4'-C5'-C6'     | 120.28(19) | C5'-C6'-C1'     | 120.22(18) |
| C1'-C7'-C8'     | 111.00(14) | C7'-C8'-S1'     | 112.81(11) | S1'-O1'-Na1#3   | 159.41(7)  |
| S1'-O1'-Na1     | 97.58(6)   | Na1#3-O1'-Na1   | 94.30(4)   | S1'-O1'-Na1#6   | 100.51(6)  |
| Na1#3-O1'-Na1#6 | 85.16(4)   | Na1-O1'-Na1#6   | 127.81(5)  | S1'-O2'-Na1#5   | 145.98(7)  |
| S1'-O2'-Na1     | 92.94(5)   | Na1#5-O2'-Na1   | 81.42(4)   | S1'-O3'-Na1#4   | 132.15(7)  |
| S1'-O3'-Na1#6   | 92.15(6)   | Na1#4-O3'-Na1#6 | 79.41(4)   | O2'-S1'-O3'     | 114.31(7)  |
| O2'-S1'-O1'     | 111.29(7)  | O3'-S1'-O1'     | 110.81(7)  | O2'-S1'-C8'     | 106.45(7)  |
| O3'-S1'-C8'     | 107.66(7)  | O1'-S1'-C8'     | 105.79(7)  | O2'-S1'-Na1     | 58.10(5)   |
| O3'-S1'-Na1     | 136.39(5)  | O1'-S1'-Na1     | 53.36(5)   | C8'-S1'-Na1     | 115.68(6)  |
| O2'-S1'-Na1#6   | 131.00(5)  | O3'-S1'-Na1#6   | 59.46(5)   | O1'-S1'-Na1#6   | 51.39(5)   |
| C8'-S1'-Na1#6   | 122.01(5)  | Na1-S1'-Na1#6   | 92.15(2)   | O1#7-Na1'-O2#5  | 85.98(4)   |
| O1#7-Na1'-O3    | 113.65(5)  | O2#5-Na1'-O3    | 160.36(5)  | O1#7-Na1'-O1#2  | 86.03(4)   |
| O2#5-Na1'-O1#2  | 87.24(4)   | O3-Na1'-O1#2    | 93.37(4)   | O1#7-Na1'-O1#8  | 134.30(5)  |
| O2#5-Na1'-O1#8  | 85.37(4)   | O3-Na1'-O1#8    | 81.08(4)   | O1#2-Na1'-O1#8  | 138.09(5)  |
| O1#7-Na1'-O2#2  | 141.75(5)  | O2#5-Na1'-O2#2  | 80.37(4)   | O3-Na1'-O2#2    | 83.33(4)   |
| O1#2-Na1'-O2#2  | 57.92(4)   | O1#8-Na1'-O2#2  | 80.17(4)   | O1#7-Na1'-O3#8  | 77.87(4)   |
| O2#5-Na1'-O3#8  | 81.37(4)   | O3-Na1'-O3#8    | 102.53(4)  | O1#2-Na1'-O3#8  | 160.84(4)  |
| O1#8-Na1'-O3#8  | 56.47(4)   | O2#2-Na1'-O3#8  | 133.95(4)  | O1#7-Na1'-S1#2  | 113.87(4)  |
| O2#5-Na1'-S1#2  | 81.56(3)   | O3-Na1'-S1#2    | 89.46(3)   | O1#2-Na1'-S1#2  | 29.06(3)   |
| O1#8-Na1'-S1#2  | 109.04(3)  | O2#2-Na1'-S1#2  | 28.92(3)   | O3#8-Na1'-S1#2  | 158.46(4)  |
| O1#7-Na1'-S1#8  | 106.21(4)  | O2#5-Na1'-S1#8  | 81.84(3)   | O3-Na1'-S1#8    | 92.55(3)   |
| O1#2-Na1'-S1#8  | 162.87(4)  | O1#8-Na1'-S1#8  | 28.10(3)   | O2#2-Na1'-S1#8  | 106.95(3)  |
| O3#8-Na1'-S1#8  | 28.39(3)   | S1#2-Na1'-S1#8  | 135.08(2)  | O1#7-Na1'-Na1#2 | 166.80(4)  |
| O2#5-Na1'-Na1#2 | 106.69(4)  | O3-Na1'-Na1#2   | 53.77(3)   | O1#2-Na1'-Na1#2 | 98.03(3)   |
| O1#8-Na1'-Na1#2 | 45.91(3)   | O2#2-Na1'-Na1#2 | 47.22(3)   | O3#8-Na1'-Na1#2 | 99.98(3)   |

|                  |            |                  |            |                  |           |
|------------------|------------|------------------|------------|------------------|-----------|
| S1#2-Na1'-Na1#2  | 72.612(19) | S1'#8-Na1'-Na1#2 | 72.789(19) | O1#7-Na1'-Na1#5  | 48.89(3)  |
| O2'#5-Na1'-Na1#5 | 51.39(3)   | O3-Na1'-Na1#5    | 143.01(4)  | O1#2-Na1'-Na1#5  | 114.17(4) |
| O1'#8-Na1'-Na1#5 | 92.57(3)   | O2#2-Na1'-Na1#5  | 131.72(4)  | O3'#8-Na1'-Na1#5 | 46.92(3)  |
| S1#2-Na1'-Na1#5  | 126.63(2)  | S1'#8-Na1'-Na1#5 | 68.521(18) | Na1#2-Na1'-Na1#5 | 137.47(3) |
| O1#7-Na1'-Na1#5  | 44.30(3)   | O2'#5-Na1'-Na1#5 | 85.39(4)   | O3-Na1'-Na1#5    | 107.99(4) |
| O1#2-Na1'-Na1#5  | 41.73(3)   | O1'#8-Na1'-Na1#5 | 170.75(4)  | O2#2-Na1'-Na1#5  | 98.75(4)  |
| O3'#8-Na1'-Na1#5 | 121.41(4)  | S1#2-Na1'-Na1#5  | 70.00(2)   | S1'#8-Na1'-Na1#5 | 148.80(3) |
| Na1#2-Na1'-Na1#5 | 138.36(3)  | Na1#5-Na1'-Na1#5 | 81.26(2)   |                  |           |

Symmetry transformations used to generate equivalent atoms:

#1  $x-1, y, z$  #2  $-x+1, -y+1, -z+1$  #3  $-x+1, -y, -z+1$

#4  $-x+2, -y, -z+1$  #5  $-x+2, -y+1, -z+1$  #6  $x, y-1, z$

#7  $x+1, y, z$  #8  $x, y+1, z$

---

<sup>i</sup>Bruker (2009) SAINT. Bruker AXS Inc., Madison, Wisconsin, USA.

<sup>ii</sup>Bruker (2009) SHELXTL. Bruker AXS Inc., Madison, Wisconsin, USA.

<sup>iii</sup>Sheldrick, G.M. (2007) SADABS. University of Gottingen, Germany.

<sup>iv</sup>Sheldrick, G.M. (2008) Acta Cryst. A64,112-122.

<sup>v</sup>Sheldrick, G.M. (2008) Acta Cryst. A64,112-122.

<sup>vi</sup> $R1 = \sum |F_o| - |F_c| / \sum |F_o|$

$wR2 = [\sum w(F_o^2 - F_c^2)^2 / \sum w(F_o^2)]^{1/2}$

$GOF = [\sum w(F_o^2 - F_c^2)^2 / (n - p)]^{1/2}$

where n = the number of reflections and p = the number of parameters refined.

<sup>vii</sup>“ORTEP-II: A Fortran Thermal Ellipsoid Plot Program for Crystal Structure Illustrations”. C.K. Johnson (1976) ORNL-5138.

### X-ray Structure Determination of Compound 1391 (i.e., compound 10; CCDC 1427790)

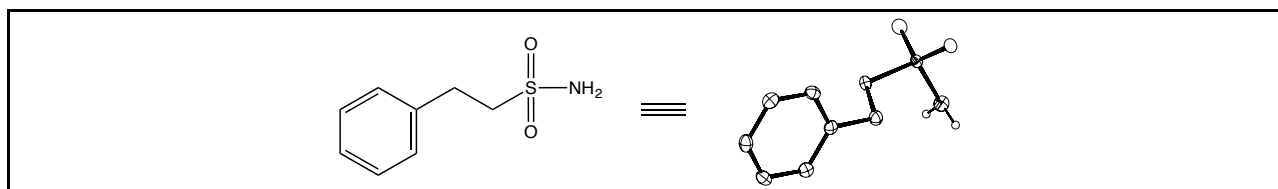

Compound 1391,  $C_8H_9NSO_2$ , crystallizes in the orthorhombic space group  $P2_12_12_1$  (systematic absences  $h00: h=\text{odd}$ ,  $0k0: k=\text{odd}$ , and  $00l: l=\text{odd}$ ) with  $a=5.8429(4)\text{\AA}$ ,  $b=7.5550(6)\text{\AA}$ ,  $c=20.0010(15)\text{\AA}$ ,  $V=882.91(11)\text{\AA}^3$ ,  $Z=4$ , and  $d_{\text{calc}}=1.394\text{ g/cm}^3$ . X-ray intensity data were collected on a Bruker APEXII CCD area detector employing graphite-monochromated Mo- $K\alpha$  radiation ( $\lambda=0.71073\text{ \AA}$ ) at a temperature of  $100(1)\text{K}$ . Preliminary indexing was performed from a series of thirty-six  $0.5^\circ$  rotation frames with exposures of 10 seconds. A total of 1547 frames were collected with a crystal to detector distance of 37.5 mm, rotation widths of  $0.5^\circ$  and exposures of 5 seconds:

| scan type | $2\theta$ | $\omega$ | $\phi$ | $\chi$ | frames |
|-----------|-----------|----------|--------|--------|--------|
| $\phi$    | -23.00    | 315.83   | 12.48  | 28.88  | 739    |
| $\phi$    | -15.50    | 349.33   | 103.59 | -77.44 | 69     |
| $\phi$    | -23.00    | 328.34   | 44.17  | 79.39  | 739    |

Rotation frames were integrated using SAINT<sup>i</sup>, producing a listing of unaveraged  $F^2$  and  $\sigma(F^2)$  values which were then passed to the SHELXTL<sup>ii</sup> program package for further processing and structure solution. A total of 10455 reflections were measured over the ranges  $2.04 \leq \theta \leq 25.36^\circ$ ,  $-6 \leq h \leq 7$ ,  $-9 \leq k \leq 9$ ,  $-24 \leq l \leq 24$  yielding 1608 unique reflections ( $R_{\text{int}} = 0.0159$ ). The intensity data were corrected for Lorentz and polarization effects and for absorption using SADABS<sup>iii</sup> (minimum and maximum transmission 0.6885, 0.7452).

The structure was solved by direct methods (SHELXS-97<sup>iv</sup>). Refinement was by full-matrix least squares based on  $F^2$  using SHELXL-97.<sup>v</sup> All reflections were used during refinement. The weighting scheme used was  $w=1/[\sigma^2(F_o^2) + (0.0332P)^2 + 0.2108P]$  where  $P = (F_o^2 + 2F_c^2)/3$ . Non-hydrogen atoms were refined anisotropically and hydrogen atoms were refined isotropically. Refinement converged to  $R1=0.0195$  and  $wR2=0.0527$  for 1598 observed reflections for which  $F > 4\sigma(F)$  and  $R1=0.0196$  and

wR2=0.0530 and GOF =1.077 for all 1608 unique, non-zero reflections and 155 variables.<sup>vi</sup> The maximum  $\Delta/\sigma$  in the final cycle of least squares was 0.001 and the two most prominent peaks in the final difference Fourier were +0.205 and -0.314 e/Å<sup>3</sup>.

The molecule is hydrogen-bonded to two neighboring molecules as shown in the drawing below:

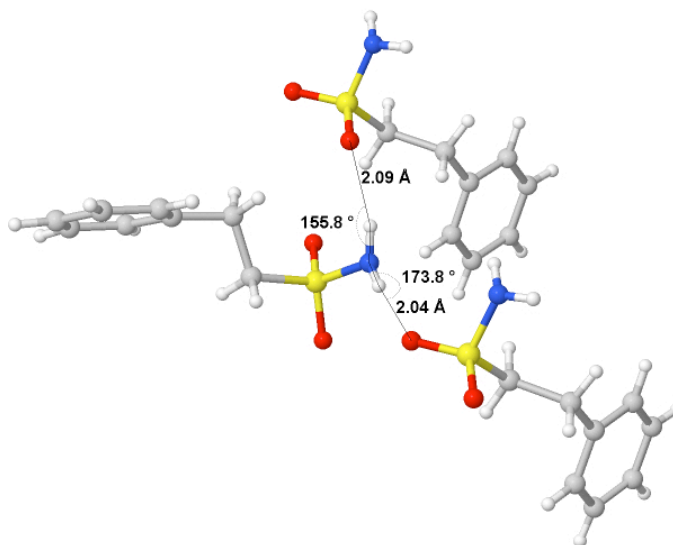

Table 1. lists cell information, data collection parameters, and refinement data. Final positional and equivalent isotropic thermal parameters are given in Tables 2. and 3. Anisotropic thermal parameters are in Table 4. Tables 5. and 6. list bond distances and bond angles. Figure 1. is an ORTEP<sup>vii</sup> representation of the molecule with 50% probability thermal ellipsoids displayed.

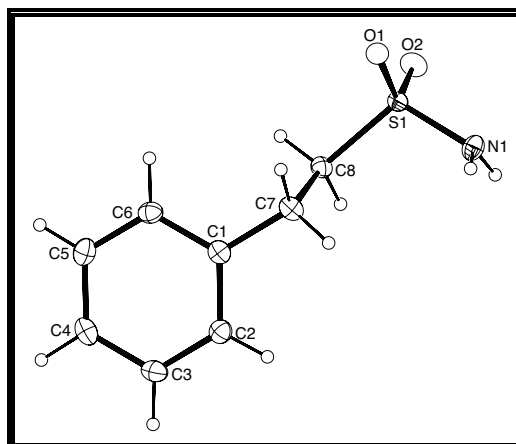

Figure 1. ORTEP drawing of the title compound with 50% probability thermal ellipsoids.

**Table 1. Summary of Structure Determination of Compound 1391**

|                                   |                                                 |
|-----------------------------------|-------------------------------------------------|
| Empirical formula                 | C <sub>8</sub> H <sub>11</sub> NSO <sub>2</sub> |
| Formula weight                    | 185.24                                          |
| Temperature                       | 100(1) K                                        |
| Wavelength                        | 0.71073 Å                                       |
| Crystal system                    | orthorhombic                                    |
| Space group                       | P2 <sub>1</sub> 2 <sub>1</sub> 2 <sub>1</sub>   |
| Cell constants:                   |                                                 |
| a                                 | 5.8429(4) Å                                     |
| b                                 | 7.5550(6) Å                                     |
| c                                 | 20.0010(15) Å                                   |
| Volume                            | 882.91(11) Å <sup>3</sup>                       |
| Z                                 | 4                                               |
| Density (calculated)              | 1.394 Mg/m <sup>3</sup>                         |
| Absorption coefficient            | 0.324 mm <sup>-1</sup>                          |
| F(000)                            | 392                                             |
| Crystal size                      | 0.45 x 0.38 x 0.06 mm <sup>3</sup>              |
| Theta range for data collection   | 2.04 to 25.36°                                  |
| Index ranges                      | -6 ≤ h ≤ 7, -9 ≤ k ≤ 9, -24 ≤ l ≤ 24            |
| Reflections collected             | 10455                                           |
| Independent reflections           | 1608 [R(int) = 0.0159]                          |
| Completeness to theta = 25.36°    | 99.7 %                                          |
| Absorption correction             | Semi-empirical from equivalents                 |
| Max. and min. transmission        | 0.7452 and 0.6885                               |
| Refinement method                 | Full-matrix least-squares on F <sup>2</sup>     |
| Data / restraints / parameters    | 1608 / 0 / 155                                  |
| Goodness-of-fit on F <sup>2</sup> | 1.077                                           |
| Final R indices [I > 2σ(I)]       | R1 = 0.0195, wR2 = 0.0527                       |
| R indices (all data)              | R1 = 0.0196, wR2 = 0.0530                       |
| Absolute structure parameter      | 0.24(6)                                         |
| Largest diff. peak and hole       | 0.205 and -0.314 e.Å <sup>-3</sup>              |

**Table 2. Refined Positional Parameters for Compound 1391**

| Atom | x           | y           | z            | $U_{eq}, \text{Å}^2$ |
|------|-------------|-------------|--------------|----------------------|
| C1   | 0.6505(2)   | 0.72938(16) | 0.30559(7)   | 0.0147(3)            |
| C2   | 0.5428(3)   | 0.66141(19) | 0.24915(7)   | 0.0169(3)            |
| C3   | 0.6416(2)   | 0.67986(18) | 0.18624(7)   | 0.0187(3)            |
| C4   | 0.8494(2)   | 0.76743(18) | 0.17919(7)   | 0.0197(3)            |
| C5   | 0.9581(3)   | 0.8366(2)   | 0.23530(7)   | 0.0194(3)            |
| C6   | 0.8594(2)   | 0.81720(17) | 0.29800(6)   | 0.0167(3)            |
| C7   | 0.5489(2)   | 0.70389(19) | 0.37427(7)   | 0.0173(3)            |
| C8   | 0.6803(2)   | 0.55942(17) | 0.41150(6)   | 0.0143(3)            |
| N1   | 0.35288(19) | 0.46355(15) | 0.50515(5)   | 0.0173(2)            |
| O1   | 0.60947(15) | 0.71092(11) | 0.52756(4)   | 0.0147(2)            |
| O2   | 0.76226(16) | 0.40593(13) | 0.52435(5)   | 0.0186(2)            |
| S1   | 0.60895(5)  | 0.53759(4)  | 0.497628(14) | 0.01228(10)          |

$U_{eq} = \frac{1}{3}[U_{11}(aa^*)^2 + U_{22}(bb^*)^2 + U_{33}(cc^*)^2 + 2U_{12}aa^*bb^*\cos\gamma + 2U_{13}aa^*cc^*\cos\beta + 2U_{23}bb^*cc^*\cos\alpha]$

**Table 3. Positional Parameters for Hydrogens in Compound 1391**

| Atom | x        | y        | z         | $U_{iso}, \text{Å}^2$ |
|------|----------|----------|-----------|-----------------------|
| H1a  | 0.332(3) | 0.355(2) | 0.4936(8) | 0.024(4)              |
| H1b  | 0.246(4) | 0.539(2) | 0.4938(9) | 0.035(5)              |
| H2   | 0.403(3) | 0.603(2) | 0.2556(7) | 0.019(4)              |
| H3   | 0.574(3) | 0.637(2) | 0.1474(8) | 0.023(4)              |
| H4   | 0.920(3) | 0.773(2) | 0.1348(9) | 0.022(4)              |
| H5   | 1.101(3) | 0.889(2) | 0.2310(8) | 0.025(4)              |
| H6   | 0.932(3) | 0.866(2) | 0.3366(8) | 0.023(4)              |
| H7a  | 0.559(3) | 0.814(2) | 0.4004(7) | 0.016(4)              |
| H7b  | 0.390(3) | 0.675(2) | 0.3707(8) | 0.022(4)              |
| H8a  | 0.844(3) | 0.588(2) | 0.4108(8) | 0.025(4)              |
| H8b  | 0.657(3) | 0.440(2) | 0.3910(7) | 0.017(4)              |

**Table 4. Refined Thermal Parameters (U's) for Compound 1391**

| Atom | $U_{11}$    | $U_{22}$    | $U_{33}$    | $U_{23}$     | $U_{13}$     | $U_{12}$    |
|------|-------------|-------------|-------------|--------------|--------------|-------------|
| C1   | 0.0160(6)   | 0.0121(6)   | 0.0160(6)   | 0.0014(5)    | -0.0001(5)   | 0.0038(5)   |
| C2   | 0.0174(7)   | 0.0150(6)   | 0.0183(6)   | 0.0007(5)    | -0.0003(5)   | 0.0002(7)   |
| C3   | 0.0235(7)   | 0.0176(7)   | 0.0151(6)   | -0.0015(5)   | -0.0037(6)   | 0.0008(6)   |
| C4   | 0.0235(7)   | 0.0194(7)   | 0.0162(7)   | 0.0021(5)    | 0.0046(5)    | 0.0023(6)   |
| C5   | 0.0174(7)   | 0.0167(7)   | 0.0240(7)   | 0.0024(6)    | 0.0014(6)    | -0.0008(7)  |
| C6   | 0.0188(6)   | 0.0142(6)   | 0.0173(6)   | -0.0004(5)   | -0.0034(5)   | 0.0003(6)   |
| C7   | 0.0183(6)   | 0.0186(7)   | 0.0151(6)   | 0.0006(5)    | 0.0005(5)    | 0.0033(6)   |
| C8   | 0.0169(7)   | 0.0137(6)   | 0.0124(6)   | -0.0022(5)   | 0.0017(5)    | 0.0002(5)   |
| N1   | 0.0182(5)   | 0.0120(5)   | 0.0217(6)   | -0.0006(5)   | 0.0010(4)    | -0.0019(4)  |
| O1   | 0.0169(4)   | 0.0126(4)   | 0.0147(4)   | -0.0020(3)   | 0.0001(4)    | 0.0005(4)   |
| O2   | 0.0224(5)   | 0.0163(5)   | 0.0171(4)   | 0.0009(4)    | -0.0023(4)   | 0.0047(4)   |
| S1   | 0.01492(16) | 0.01041(16) | 0.01150(15) | -0.00018(12) | -0.00055(12) | 0.00070(10) |

The form of the anisotropic displacement parameter is:  
 $\exp[-2\pi(a^*U_{11}h^2 + b^*U_{22}k^2 + c^*U_{33}l^2 + 2b^*c^*U_{23}kl + 2a^*c^*U_{13}hl + 2a^*b^*U_{12}hk)]$

**Table 5. Bond Distances in Compound 1391, Å**

|       |            |        |            |        |            |
|-------|------------|--------|------------|--------|------------|
| C1-C2 | 1.391(2)   | C1-C6  | 1.3976(18) | C1-C7  | 1.5089(18) |
| C2-C3 | 1.3914(19) | C2-H2  | 0.938(17)  | C3-C4  | 1.390(2)   |
| C3-H3 | 0.930(17)  | C4-C5  | 1.391(2)   | C4-H4  | 0.980(18)  |
| C5-C6 | 1.3880(19) | C5-H5  | 0.928(18)  | C6-H6  | 0.954(17)  |
| C7-C8 | 1.5281(18) | C7-H7a | 0.983(16)  | C7-H7b | 0.954(18)  |
| C8-S1 | 1.7800(13) | C8-H8a | 0.979(18)  | C8-H8b | 1.000(16)  |
| N1-S1 | 1.6044(11) | N1-H1a | 0.864(18)  | N1-H1b | 0.88(2)    |
| O1-S1 | 1.4399(9)  | O2-S1  | 1.4413(10) |        |            |

**Table 6. Bond Angles in Compound 1391, °**

|           |            |           |            |            |            |
|-----------|------------|-----------|------------|------------|------------|
| C2-C1-C6  | 118.85(12) | C2-C1-C7  | 120.91(12) | C6-C1-C7   | 120.21(12) |
| C1-C2-C3  | 120.60(13) | C1-C2-H2  | 117.1(9)   | C3-C2-H2   | 122.3(9)   |
| C4-C3-C2  | 120.14(13) | C4-C3-H3  | 116.9(11)  | C2-C3-H3   | 122.9(11)  |
| C3-C4-C5  | 119.71(13) | C3-C4-H4  | 118.7(10)  | C5-C4-H4   | 121.5(10)  |
| C6-C5-C4  | 119.98(13) | C6-C5-H5  | 120.1(10)  | C4-C5-H5   | 119.8(10)  |
| C5-C6-C1  | 120.72(12) | C5-C6-H6  | 120.3(10)  | C1-C6-H6   | 118.9(10)  |
| C1-C7-C8  | 109.70(11) | C1-C7-H7a | 110.6(9)   | C8-C7-H7a  | 108.2(9)   |
| C1-C7-H7b | 110.1(9)   | C8-C7-H7b | 111.3(10)  | H7a-C7-H7b | 106.9(14)  |
| C7-C8-S1  | 114.84(9)  | C7-C8-H8a | 109.0(10)  | S1-C8-H8a  | 105.3(9)   |
| C7-C8-H8b | 112.2(9)   | S1-C8-H8b | 106.3(9)   | H8a-C8-H8b | 108.9(14)  |
| S1-N1-H1a | 116.1(11)  | S1-N1-H1b | 114.4(13)  | H1a-N1-H1b | 116.9(17)  |
| O1-S1-O2  | 118.18(6)  | O1-S1-N1  | 106.26(6)  | O2-S1-N1   | 107.71(6)  |
| O1-S1-C8  | 108.52(6)  | O2-S1-C8  | 106.10(6)  | N1-S1-C8   | 109.96(6)  |



---

<sup>i</sup>Bruker (2009) SAINT. Bruker AXS Inc., Madison, Wisconsin, USA.

<sup>ii</sup>Bruker (2009) SHELXTL. Bruker AXS Inc., Madison, Wisconsin, USA.

<sup>iii</sup>Sheldrick, G.M. (2007) SADABS. University of Gottingen, Germany.

<sup>iv</sup>Sheldrick, G.M. (2008) Acta Cryst. A64,112-122.

<sup>v</sup>Sheldrick, G.M. (2008) Acta Cryst. A64,112-122.

<sup>vi</sup> $R1 = \sum |F_o| - |F_c| / \sum |F_o|$

$wR2 = [\sum w(F_o^2 - F_c^2)^2 / \sum w(F_o^2)]^{1/2}$

$GOF = [\sum w(F_o^2 - F_c^2)^2 / (n - p)]^{1/2}$

where n = the number of reflections and p = the number of parameters refined.

<sup>vii</sup>“ORTEP-II: A Fortran Thermal Ellipsoid Plot Program for Crystal Structure Illustrations”. C.K. Johnson (1976) ORNL-5138.

### X-ray Structure Determination of Compound 1357 (i.e., compound 11; CCDC 1428190)

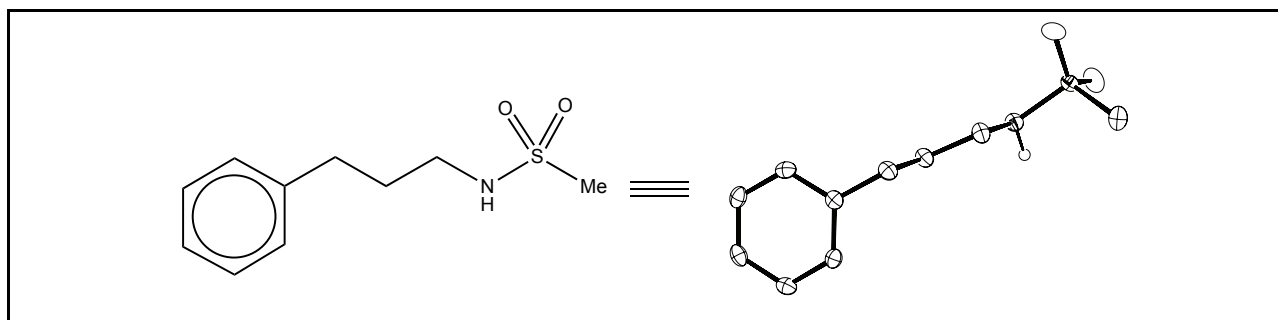

Compound 1357,  $C_{10}H_{15}NSO_2$ , crystallizes in the orthorhombic space group  $Pca2_1$  (systematic absences  $h0l$ :  $h=\text{odd}$  and  $0kl$ :  $l=\text{odd}$ ) with  $a=15.8467(11)\text{\AA}$ ,  $b=20.1022(14)\text{\AA}$ ,  $c=6.8680(5)\text{\AA}$ ,  $V=2187.8(3)\text{\AA}^3$ ,  $Z=8$ , and  $d_{\text{calc}}=1.295\text{ g/cm}^3$ . X-ray intensity data were collected on a Bruker APEXII CCD area detector employing graphite-monochromated Mo- $K\alpha$  radiation ( $\lambda=0.71073\text{ \AA}$ ) at a temperature of 100(1)K. Preliminary indexing was performed from a series of thirty-six  $0.5^\circ$  rotation frames with exposures of 10 seconds. A total of 3591 frames were collected with a crystal to detector distance of 37.6 mm, rotation widths of  $0.5^\circ$  and exposures of 15 seconds:

| scan type | $2\theta$ | $\omega$ | $\phi$ | $\chi$ | frames |
|-----------|-----------|----------|--------|--------|--------|
| $\phi$    | -23.00    | 315.83   | 12.48  | 28.88  | 739    |
| $\omega$  | 14.50     | 306.52   | 54.11  | 21.36  | 103    |
| $\phi$    | -15.50    | 258.48   | 18.97  | 19.46  | 715    |
| $\phi$    | -10.50    | 336.23   | 38.95  | 73.66  | 739    |
| $\phi$    | 19.50     | 59.55    | 353.14 | -26.26 | 727    |
| $\phi$    | -18.00    | 353.69   | 82.73  | -86.54 | 459    |
| $\omega$  | 2.00      | 308.89   | 175.72 | 99.23  | 109    |

Rotation frames were integrated using SAINT<sup>i</sup>, producing a listing of unaveraged  $F^2$  and  $\sigma(F^2)$  values which were then passed to the SHELXTL<sup>ii</sup> program package for further processing and structure solution. A total of 67397 reflections were measured over the ranges  $1.64 \leq \theta \leq 25.38^\circ$ ,  $-19 \leq h \leq 19$ ,  $-24 \leq k \leq 24$ ,  $-8 \leq l \leq 8$  yielding 3989 unique reflections ( $R_{\text{int}} = 0.0216$ ). The intensity data were corrected for Lorentz and polarization effects and for absorption using SADABS<sup>iii</sup> (minimum and maximum transmission 0.6915, 0.7452).

The structure was solved by direct methods (SHELXS-97<sup>iv</sup>). The asymmetric unit consists of two

molecules. Refinement was by full-matrix least squares based on  $F^2$  using SHELXL-97.<sup>v</sup> All reflections were used during refinement. The weighting scheme used was  $w=1/[\sigma^2(F_o^2) + (0.0228P)^2 + 0.7245P]$  where  $P = (F_o^2 + 2F_c^2)/3$ . Non-hydrogen atoms were refined anisotropically and hydrogen atoms were refined using a riding model. Refinement converged to  $R1=0.0228$  and  $wR2=0.0581$  for 3853 observed reflections for which  $F > 4\sigma(F)$  and  $R1=0.0246$  and  $wR2=0.0598$  and  $GOF = 1.134$  for all 3989 unique, non-zero reflections and 256 variables.<sup>vi</sup> The maximum  $\Delta/\sigma$  in the final cycle of least squares was 0.001 and the two most prominent peaks in the final difference Fourier were  $+0.279$  and  $-0.193 \text{ e}/\text{\AA}^3$ .

Table 1. lists cell information, data collection parameters, and refinement data. Final positional and equivalent isotropic thermal parameters are given in Tables 2. and 3. Anisotropic thermal parameters are in Table 4. Tables 5. and 6. list bond distances and bond angles. Figures 1. and 2. are ORTEP<sup>vii</sup> representations of the molecule with 50% probability thermal ellipsoids displayed.

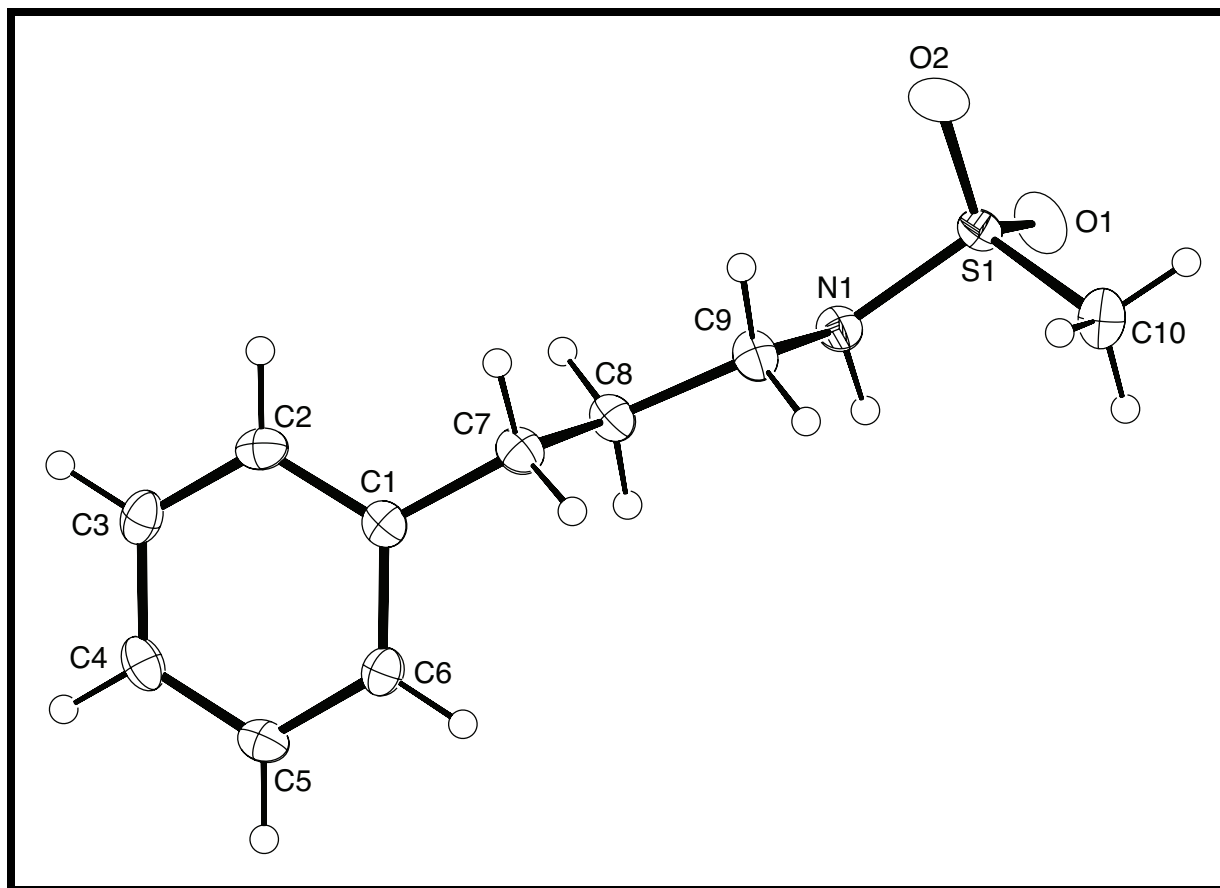

Figure 1. ORTEP drawing of molecule no. 1 of the asymmetric unit with 50% probability thermal ellipsoids.

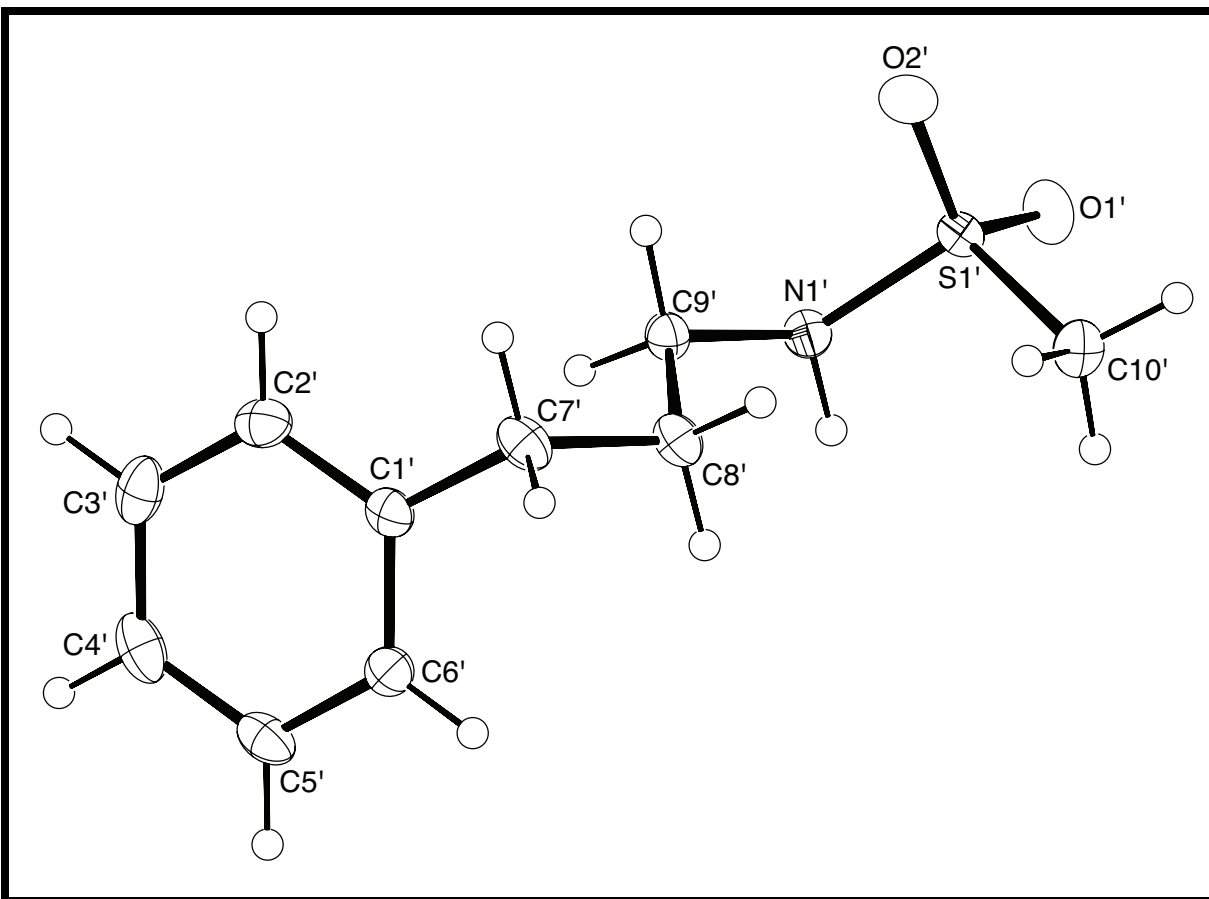

Figure 2. ORTEP drawing of molecule no. 2 of the asymmetric unit with 50% probability thermal ellipsoids.

**Table 1. Summary of Structure Determination of Compound 1357**

|                                   |                                                  |
|-----------------------------------|--------------------------------------------------|
| Empirical formula                 | C <sub>10</sub> H <sub>15</sub> NSO <sub>2</sub> |
| Formula weight                    | 213.29                                           |
| Temperature                       | 100(1) K                                         |
| Wavelength                        | 0.71073 Å                                        |
| Crystal system                    | orthorhombic                                     |
| Space group                       | Pca2 <sub>1</sub>                                |
| Cell constants:                   |                                                  |
| a                                 | 15.8467(11) Å                                    |
| b                                 | 20.1022(14) Å                                    |
| c                                 | 6.8680(5) Å                                      |
| Volume                            | 2187.8(3) Å <sup>3</sup>                         |
| Z                                 | 8                                                |
| Density (calculated)              | 1.295 Mg/m <sup>3</sup>                          |
| Absorption coefficient            | 0.271 mm <sup>-1</sup>                           |
| F(000)                            | 912                                              |
| Crystal size                      | 0.42 x 0.14 x 0.02 mm <sup>3</sup>               |
| Theta range for data collection   | 1.64 to 25.38°                                   |
| Index ranges                      | -19 ≤ h ≤ 19, -24 ≤ k ≤ 24, -8 ≤ l ≤ 8           |
| Reflections collected             | 67397                                            |
| Independent reflections           | 3989 [R(int) = 0.0216]                           |
| Completeness to theta = 25.38°    | 100.0 %                                          |
| Absorption correction             | Semi-empirical from equivalents                  |
| Max. and min. transmission        | 0.7452 and 0.6915                                |
| Refinement method                 | Full-matrix least-squares on F <sup>2</sup>      |
| Data / restraints / parameters    | 3989 / 1 / 256                                   |
| Goodness-of-fit on F <sup>2</sup> | 1.134                                            |
| Final R indices [I > 2σ(I)]       | R1 = 0.0228, wR2 = 0.0581                        |
| R indices (all data)              | R1 = 0.0246, wR2 = 0.0598                        |
| Absolute structure parameter      | 0.01(4)                                          |
| Largest diff. peak and hole       | 0.279 and -0.193 e.Å <sup>-3</sup>               |

Table 2. Refined Positional Parameters for Compound 1357

| Atom | x           | y            | z           | $U_{eq}, \text{Å}^2$ |
|------|-------------|--------------|-------------|----------------------|
| C1   | 0.39833(9)  | 0.25581(8)   | 0.1192(2)   | 0.0166(3)            |
| C2   | 0.40679(10) | 0.19053(8)   | 0.1818(2)   | 0.0199(3)            |
| C3   | 0.36642(10) | 0.13870(8)   | 0.0863(2)   | 0.0210(4)            |
| C4   | 0.31614(10) | 0.15194(8)   | -0.0746(2)  | 0.0203(3)            |
| C5   | 0.30828(9)  | 0.21666(8)   | -0.1421(2)  | 0.0193(3)            |
| C6   | 0.34954(10) | 0.26811(8)   | -0.0462(2)  | 0.0184(3)            |
| C7   | 0.43570(9)  | 0.31344(8)   | 0.2305(2)   | 0.0200(3)            |
| C8   | 0.37189(10) | 0.33989(8)   | 0.3799(2)   | 0.0197(3)            |
| C9   | 0.40363(10) | 0.40137(8)   | 0.4833(3)   | 0.0199(3)            |
| C10  | 0.39419(10) | 0.55223(8)   | 0.6613(3)   | 0.0239(4)            |
| N1   | 0.33869(8)  | 0.42459(7)   | 0.6228(2)   | 0.0185(3)            |
| O1   | 0.29136(7)  | 0.49285(6)   | 0.89793(18) | 0.0261(3)            |
| O2   | 0.43935(8)  | 0.45416(6)   | 0.88299(19) | 0.0306(3)            |
| S1   | 0.36595(2)  | 0.478988(19) | 0.78481(5)  | 0.01713(10)          |
| C1'  | 0.41291(9)  | 0.76803(8)   | 0.1378(2)   | 0.0173(3)            |
| C2'  | 0.42073(10) | 0.70499(8)   | 0.2188(2)   | 0.0222(3)            |
| C3'  | 0.37159(10) | 0.65232(8)   | 0.1519(3)   | 0.0250(4)            |
| C4'  | 0.31405(10) | 0.66226(9)   | 0.0027(3)   | 0.0247(4)            |
| C5'  | 0.30568(10) | 0.72466(8)   | -0.0796(3)  | 0.0226(4)            |
| C6'  | 0.35474(10) | 0.77713(8)   | -0.0127(2)  | 0.0188(3)            |
| C7'  | 0.46608(9)  | 0.82592(8)   | 0.2057(3)   | 0.0215(3)            |
| C8'  | 0.41617(10) | 0.88048(8)   | 0.3099(2)   | 0.0197(3)            |
| C9'  | 0.37677(10) | 0.85521(8)   | 0.4974(2)   | 0.0179(3)            |
| C10' | 0.38580(10) | 1.03121(7)   | 0.5778(3)   | 0.0203(3)            |
| N1'  | 0.32323(7)  | 0.90349(6)   | 0.60128(19) | 0.0168(3)            |
| O1'  | 0.29822(7)  | 0.98428(5)   | 0.86277(17) | 0.0231(3)            |
| O2'  | 0.44100(7)  | 0.93820(6)   | 0.81187(18) | 0.0243(3)            |
| S1'  | 0.36360(2)  | 0.962732(19) | 0.73120(5)  | 0.01536(9)           |

$U_{eq} = \frac{1}{3}[U_{11}(aa^*)^2 + U_{22}(bb^*)^2 + U_{33}(cc^*)^2 + 2U_{12}aa^*bb^*\cos\gamma + 2U_{13}aa^*cc^*\cos\beta + 2U_{23}bb^*cc^*\cos\alpha]$

**Table 3. Positional Parameters for Hydrogens in Compound 1357**

| Atom  | x      | y      | z       | $U_{iso}, \text{\AA}^2$ |
|-------|--------|--------|---------|-------------------------|
| H2    | 0.4402 | 0.1813 | 0.2899  | 0.027                   |
| H3    | 0.3730 | 0.0952 | 0.1299  | 0.028                   |
| H4    | 0.2878 | 0.1175 | -0.1370 | 0.027                   |
| H5    | 0.2755 | 0.2256 | -0.2513 | 0.026                   |
| H6    | 0.3446 | 0.3114 | -0.0928 | 0.024                   |
| H7a   | 0.4509 | 0.3487 | 0.1407  | 0.027                   |
| H7b   | 0.4865 | 0.2991 | 0.2970  | 0.027                   |
| H8a   | 0.3194 | 0.3503 | 0.3141  | 0.026                   |
| H8b   | 0.3604 | 0.3055 | 0.4753  | 0.026                   |
| H9a   | 0.4555 | 0.3912 | 0.5523  | 0.027                   |
| H9b   | 0.4155 | 0.4361 | 0.3891  | 0.027                   |
| H10a  | 0.4107 | 0.5855 | 0.7540  | 0.036                   |
| H10b  | 0.3468 | 0.5680 | 0.5874  | 0.036                   |
| H10c  | 0.4405 | 0.5432 | 0.5751  | 0.036                   |
| H2'   | 0.4592 | 0.6979 | 0.3188  | 0.030                   |
| H3'   | 0.3774 | 0.6104 | 0.2075  | 0.033                   |
| H4'   | 0.2812 | 0.6271 | -0.0419 | 0.033                   |
| H5'   | 0.2672 | 0.7315 | -0.1799 | 0.030                   |
| H6'   | 0.3488 | 0.8190 | -0.0689 | 0.025                   |
| H7a'  | 0.4943 | 0.8453 | 0.0939  | 0.029                   |
| H7b'  | 0.5093 | 0.8094 | 0.2932  | 0.029                   |
| H8a'  | 0.4535 | 0.9174 | 0.3393  | 0.026                   |
| H8b'  | 0.3721 | 0.8967 | 0.2243  | 0.026                   |
| H9a'  | 0.3430 | 0.8163 | 0.4674  | 0.024                   |
| H9b'  | 0.4217 | 0.8412 | 0.5841  | 0.024                   |
| H10a' | 0.4009 | 1.0690 | 0.6557  | 0.030                   |
| H10b' | 0.3368 | 1.0416 | 0.5016  | 0.030                   |
| H10c' | 0.4318 | 1.0202 | 0.4927  | 0.030                   |
| H1    | 0.2881 | 0.4396 | 0.5662  | 0.030                   |
| H1'   | 0.2775 | 0.9171 | 0.5289  | 0.030                   |

**Table 4. Refined Thermal Parameters (U's) for Compound 1357**

| Atom | U <sub>11</sub> | U <sub>22</sub> | U <sub>33</sub> | U <sub>23</sub> | U <sub>13</sub> | U <sub>12</sub> |
|------|-----------------|-----------------|-----------------|-----------------|-----------------|-----------------|
| C1   | 0.0117(7)       | 0.0210(8)       | 0.0171(8)       | -0.0026(6)      | 0.0046(6)       | 0.0016(6)       |
| C2   | 0.0163(7)       | 0.0270(8)       | 0.0165(8)       | 0.0013(6)       | 0.0011(6)       | 0.0051(6)       |
| C3   | 0.0224(8)       | 0.0173(8)       | 0.0233(9)       | 0.0007(7)       | 0.0069(7)       | 0.0036(6)       |
| C4   | 0.0170(7)       | 0.0214(8)       | 0.0226(8)       | -0.0071(7)      | 0.0043(6)       | -0.0030(6)      |
| C5   | 0.0134(7)       | 0.0274(8)       | 0.0171(8)       | -0.0026(6)      | 0.0000(6)       | 0.0021(6)       |
| C6   | 0.0173(8)       | 0.0168(8)       | 0.0209(9)       | 0.0005(6)       | 0.0030(6)       | 0.0011(6)       |
| C7   | 0.0159(7)       | 0.0230(8)       | 0.0211(8)       | -0.0023(7)      | -0.0002(7)      | -0.0009(6)      |
| C8   | 0.0178(8)       | 0.0215(8)       | 0.0198(8)       | -0.0032(7)      | 0.0001(7)       | -0.0006(6)      |
| C9   | 0.0144(7)       | 0.0212(8)       | 0.0242(8)       | -0.0042(7)      | 0.0009(7)       | -0.0009(6)      |
| C10  | 0.0222(8)       | 0.0208(8)       | 0.0288(9)       | -0.0008(7)      | 0.0085(8)       | -0.0012(7)      |
| N1   | 0.0136(6)       | 0.0208(7)       | 0.0211(8)       | -0.0016(6)      | -0.0010(6)      | 0.0001(5)       |
| O1   | 0.0261(6)       | 0.0281(6)       | 0.0240(6)       | -0.0054(5)      | 0.0093(5)       | -0.0072(5)      |
| O2   | 0.0283(6)       | 0.0358(7)       | 0.0278(7)       | -0.0018(6)      | -0.0137(6)      | 0.0004(5)       |
| S1   | 0.01651(18)     | 0.01924(18)     | 0.0156(2)       | -0.00111(15)    | -0.00030(16)    | -0.00209(14)    |
| C1'  | 0.0152(7)       | 0.0214(8)       | 0.0155(8)       | -0.0036(6)      | 0.0033(6)       | 0.0026(6)       |
| C2'  | 0.0194(8)       | 0.0280(8)       | 0.0193(9)       | -0.0008(7)      | -0.0001(7)      | 0.0062(6)       |
| C3'  | 0.0286(9)       | 0.0187(8)       | 0.0278(9)       | 0.0007(7)       | 0.0123(7)       | 0.0046(7)       |
| C4'  | 0.0190(8)       | 0.0257(8)       | 0.0294(9)       | -0.0118(7)      | 0.0087(7)       | -0.0034(7)      |
| C5'  | 0.0164(8)       | 0.0317(9)       | 0.0197(8)       | -0.0083(7)      | -0.0003(6)      | 0.0007(6)       |
| C6'  | 0.0196(8)       | 0.0198(8)       | 0.0168(8)       | -0.0004(6)      | 0.0024(6)       | 0.0014(6)       |
| C7'  | 0.0172(7)       | 0.0262(8)       | 0.0211(9)       | -0.0053(7)      | 0.0012(6)       | -0.0037(6)      |
| C8'  | 0.0184(7)       | 0.0207(7)       | 0.0200(8)       | -0.0037(7)      | 0.0009(7)       | -0.0029(6)      |
| C9'  | 0.0186(8)       | 0.0170(7)       | 0.0181(8)       | -0.0025(6)      | -0.0003(6)      | 0.0017(6)       |
| C10' | 0.0201(8)       | 0.0190(8)       | 0.0218(9)       | 0.0018(7)       | 0.0058(7)       | -0.0028(6)      |
| N1'  | 0.0120(6)       | 0.0186(6)       | 0.0197(7)       | -0.0012(5)      | -0.0001(5)      | -0.0002(5)      |
| O1'  | 0.0245(6)       | 0.0216(6)       | 0.0233(6)       | -0.0036(5)      | 0.0089(5)       | -0.0027(5)      |
| O2'  | 0.0204(6)       | 0.0271(6)       | 0.0254(6)       | -0.0007(5)      | -0.0075(5)      | -0.0012(5)      |
| S1'  | 0.01412(18)     | 0.01772(17)     | 0.0142(2)       | -0.00099(14)    | 0.00104(15)     | -0.00184(13)    |

The form of the anisotropic displacement parameter is:  
 $\exp[-2\pi(a^2U_{11}h^2+b^2U_{22}k^2+c^2U_{33}l^2+2b^*c^*U_{23}kl+2a^*c^*U_{13}hl+2a^*b^*U_{12}hk)]$



**Table 5. Bond Distances in Compound 1357, Å**

|          |            |         |            |         |            |
|----------|------------|---------|------------|---------|------------|
| C1-C2    | 1.387(2)   | C1-C6   | 1.396(2)   | C1-C7   | 1.509(2)   |
| C2-C3    | 1.388(2)   | C3-C4   | 1.388(2)   | C4-C5   | 1.387(2)   |
| C5-C6    | 1.390(2)   | C7-C8   | 1.535(2)   | C8-C9   | 1.512(2)   |
| C9-N1    | 1.481(2)   | C10-S1  | 1.7571(17) | N1-S1   | 1.6190(14) |
| O1-S1    | 1.4416(12) | O2-S1   | 1.4340(12) | C1'-C2' | 1.389(2)   |
| C1'-C6'  | 1.397(2)   | C1'-C7' | 1.511(2)   | C2'-C3' | 1.392(2)   |
| C3'-C4'  | 1.386(3)   | C4'-C5' | 1.382(2)   | C5'-C6' | 1.389(2)   |
| C7'-C8'  | 1.530(2)   | C8'-C9' | 1.519(2)   | C9'-N1' | 1.4735(19) |
| C10'-S1' | 1.7690(16) | N1'-S1' | 1.6198(13) | O1'-S1' | 1.4414(11) |
| O2'-S1'  | 1.4333(11) |         |            |         |            |

**Table 6. Bond Angles in Compound 1357, °**

|              |            |              |            |              |            |
|--------------|------------|--------------|------------|--------------|------------|
| C2-C1-C6     | 118.24(15) | C2-C1-C7     | 122.08(14) | C6-C1-C7     | 119.58(14) |
| C1-C2-C3     | 121.27(15) | C4-C3-C2     | 119.81(15) | C5-C4-C3     | 119.84(15) |
| C4-C5-C6     | 119.84(15) | C5-C6-C1     | 120.96(15) | C1-C7-C8     | 110.23(12) |
| C9-C8-C7     | 112.21(13) | N1-C9-C8     | 109.28(12) | C9-N1-S1     | 118.15(10) |
| O2-S1-O1     | 118.61(8)  | O2-S1-N1     | 107.73(7)  | O1-S1-N1     | 106.40(7)  |
| O2-S1-C10    | 108.18(8)  | O1-S1-C10    | 107.87(8)  | N1-S1-C10    | 107.59(8)  |
| C2'-C1'-C6'  | 118.33(15) | C2'-C1'-C7'  | 121.95(14) | C6'-C1'-C7'  | 119.71(14) |
| C1'-C2'-C3'  | 120.77(16) | C4'-C3'-C2'  | 120.15(16) | C5'-C4'-C3'  | 119.76(16) |
| C4'-C5'-C6'  | 120.01(16) | C5'-C6'-C1'  | 120.98(15) | C1'-C7'-C8'  | 114.10(12) |
| C9'-C8'-C7'  | 111.67(13) | N1'-C9'-C8'  | 115.28(13) | C9'-N1'-S1'  | 121.58(10) |
| O2'-S1'-O1'  | 118.44(8)  | O2'-S1'-N1'  | 107.33(7)  | O1'-S1'-N1'  | 106.40(7)  |
| O2'-S1'-C10' | 109.14(7)  | O1'-S1'-C10' | 106.41(7)  | N1'-S1'-C10' | 108.82(7)  |

---

<sup>i</sup>Bruker (2009) SAINT. Bruker AXS Inc., Madison, Wisconsin, USA.

<sup>ii</sup>Bruker (2009) SHELXTL. Bruker AXS Inc., Madison, Wisconsin, USA.

<sup>iii</sup>Sheldrick, G.M. (2007) SADABS. University of Gottingen, Germany.

<sup>iv</sup>Sheldrick, G.M. (2008) Acta Cryst. A64,112-122.

<sup>v</sup>Sheldrick, G.M. (2008) Acta Cryst. A64,112-122.

<sup>vi</sup> $R1 = \sum |F_o| - |F_c| / \sum |F_o|$

$wR2 = [\sum w(F_o^2 - F_c^2)^2 / \sum w(F_o^2)]^{1/2}$

$GOF = [\sum w(F_o^2 - F_c^2)^2 / (n - p)]^{1/2}$

where n = the number of reflections and p = the number of parameters refined.

<sup>vii</sup>“ORTEP-II: A Fortran Thermal Ellipsoid Plot Program for Crystal Structure Illustrations”. C.K. Johnson (1976) ORNL-5138.

### X-ray Structure Determination of Compound 1363 (i.e., compound 12; CCDC 1428042)

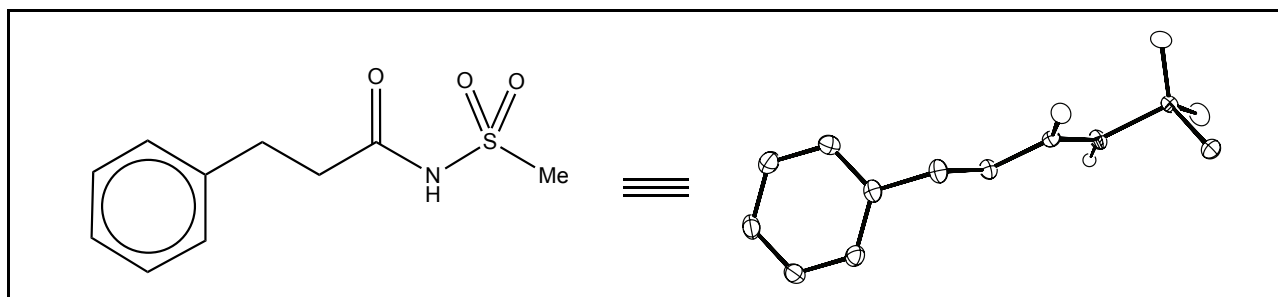

Compound 1363,  $C_{10}H_{13}NSO_3$ , crystallizes in the monoclinic space group  $P2_1/c$  (systematic absences  $0k0$ :  $k=\text{odd}$  and  $h0l$ :  $l=\text{odd}$ ) with  $a=12.5027(6)\text{\AA}$ ,  $b=9.3720(5)\text{\AA}$ ,  $c=9.8492(5)\text{\AA}$ ,  $\beta=112.719(2)^\circ$ ,  $V=1064.54(9)\text{\AA}^3$ ,  $Z=4$ , and  $d_{\text{calc}}=1.418\text{ g/cm}^3$ . X-ray intensity data were collected on a Bruker APEXII CCD area detector employing graphite-monochromated Mo- $K\alpha$  radiation ( $\lambda=0.71073\text{ \AA}$ ) at a temperature of  $100(1)\text{K}$ . Preliminary indexing was performed from a series of thirty-six  $0.5^\circ$  rotation frames with exposures of 10 seconds. A total of 1987 frames were collected with a crystal to detector distance of 37.6 mm, rotation widths of  $0.5^\circ$  and exposures of 5 seconds:

| scan type | $2\theta$ | $\omega$ | $\phi$ | $\chi$ | frames |
|-----------|-----------|----------|--------|--------|--------|
| $\phi$    | -23.00    | 315.83   | 12.48  | 28.88  | 577    |
| $\phi$    | -15.50    | 258.48   | 277.85 | 19.46  | 199    |
| $\phi$    | -20.50    | 342.55   | 354.55 | -73.06 | 588    |
| $\phi$    | 19.50     | 327.79   | 20.94  | 36.30  | 623    |

Rotation frames were integrated using SAINT<sup>i</sup>, producing a listing of unaveraged  $F^2$  and  $\sigma(F^2)$  values which were then passed to the SHELXTL<sup>ii</sup> program package for further processing and structure solution. A total of 17582 reflections were measured over the ranges  $2.80 \leq \theta \leq 25.39^\circ$ ,  $-15 \leq h \leq 15$ ,  $-11 \leq k \leq 11$ ,  $-11 \leq l \leq 11$  yielding 1952 unique reflections ( $R_{\text{int}} = 0.0202$ ). The intensity data were corrected for Lorentz and polarization effects and for absorption using SADABS<sup>iii</sup> (minimum and maximum transmission 0.7035, 0.7452).

The structure was solved by direct methods (SHELXS-97<sup>iv</sup>). Refinement was by full-matrix least squares based on  $F^2$  using SHELXL-97.<sup>v</sup> All reflections were used during refinement. The weighting scheme used was  $w=1/[\sigma^2(F_o^2) + (0.0342P)^2 + 0.6312P]$  where  $P = (F_o^2 + 2F_c^2)/3$ . Non-hydrogen atoms

were refined anisotropically and hydrogen atoms were refined using a riding model. Refinement converged to  $R1=0.0261$  and  $wR2=0.0697$  for 1863 observed reflections for which  $F > 4\sigma(F)$  and  $R1=0.0271$  and  $wR2=0.0709$  and  $GOF = 1.091$  for all 1952 unique, non-zero reflections and 138 variables.<sup>vi</sup> The maximum  $\Delta/\sigma$  in the final cycle of least squares was 0.000 and the two most prominent peaks in the final difference Fourier were  $+0.363$  and  $-0.392 \text{ e}/\text{\AA}^3$ .

Table 1. lists cell information, data collection parameters, and refinement data. Final positional and equivalent isotropic thermal parameters are given in Tables 2. and 3. Anisotropic thermal parameters are in Table 4. Tables 5. and 6. list bond distances and bond angles. Figure 1. is an ORTEP<sup>vii</sup> representation of the molecule with 50% probability thermal ellipsoids displayed.

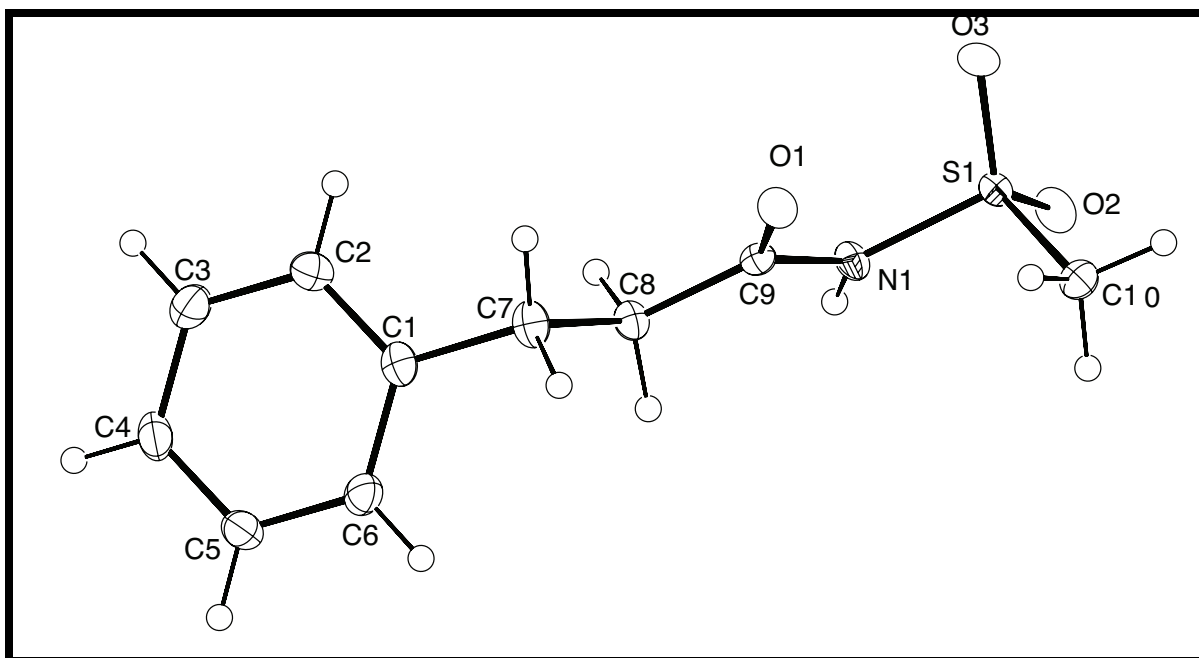

Figure 1. ORTEP drawing of the title compound with 50% probability thermal ellipsoids.

**Table 1. Summary of Structure Determination of Compound 1363**

|                                   |                                                  |
|-----------------------------------|--------------------------------------------------|
| Empirical formula                 | C <sub>10</sub> H <sub>13</sub> NSO <sub>3</sub> |
| Formula weight                    | 227.27                                           |
| Temperature                       | 100(1) K                                         |
| Wavelength                        | 0.71073 Å                                        |
| Crystal system                    | monoclinic                                       |
| Space group                       | P2 <sub>1</sub> /c                               |
| Cell constants:                   |                                                  |
| a                                 | 12.5027(6) Å                                     |
| b                                 | 9.3720(5) Å                                      |
| c                                 | 9.8492(5) Å                                      |
| β                                 | 112.719(2)°                                      |
| Volume                            | 1064.54(9) Å <sup>3</sup>                        |
| Z                                 | 4                                                |
| Density (calculated)              | 1.418 Mg/m <sup>3</sup>                          |
| Absorption coefficient            | 0.290 mm <sup>-1</sup>                           |
| F(000)                            | 480                                              |
| Crystal size                      | 0.42 x 0.22 x 0.08 mm <sup>3</sup>               |
| Theta range for data collection   | 2.80 to 25.39°                                   |
| Index ranges                      | -15 ≤ h ≤ 15, -11 ≤ k ≤ 11, -11 ≤ l ≤ 11         |
| Reflections collected             | 17582                                            |
| Independent reflections           | 1952 [R(int) = 0.0202]                           |
| Completeness to theta = 25.39°    | 99.6 %                                           |
| Absorption correction             | Semi-empirical from equivalents                  |
| Max. and min. transmission        | 0.7452 and 0.7035                                |
| Refinement method                 | Full-matrix least-squares on F <sup>2</sup>      |
| Data / restraints / parameters    | 1952 / 0 / 138                                   |
| Goodness-of-fit on F <sup>2</sup> | 1.091                                            |
| Final R indices [I > 2σ(I)]       | R1 = 0.0261, wR2 = 0.0697                        |
| R indices (all data)              | R1 = 0.0271, wR2 = 0.0709                        |
| Largest diff. peak and hole       | 0.363 and -0.392 e.Å <sup>-3</sup>               |

**Table 2. Refined Positional Parameters for Compound 1363**

| Atom | x            | y           | z           | $U_{eq}, \text{Å}^2$ |
|------|--------------|-------------|-------------|----------------------|
| C1   | 0.18582(12)  | 0.16299(14) | 0.27919(15) | 0.0158(3)            |
| C2   | 0.08499(12)  | 0.16996(15) | 0.15285(16) | 0.0209(3)            |
| C3   | -0.01465(12) | 0.09849(16) | 0.14393(16) | 0.0233(3)            |
| C4   | -0.01462(12) | 0.01702(16) | 0.26092(17) | 0.0221(3)            |
| C5   | 0.08582(12)  | 0.00726(16) | 0.38649(16) | 0.0228(3)            |
| C6   | 0.18538(12)  | 0.07949(15) | 0.39585(15) | 0.0195(3)            |
| C7   | 0.29381(12)  | 0.24077(15) | 0.28712(15) | 0.0181(3)            |
| C8   | 0.36839(11)  | 0.14718(14) | 0.23240(14) | 0.0148(3)            |
| C9   | 0.46572(11)  | 0.22768(14) | 0.21322(13) | 0.0132(3)            |
| C10  | 0.74784(11)  | 0.26593(15) | 0.29316(14) | 0.0178(3)            |
| N1   | 0.53738(9)   | 0.14197(11) | 0.17007(12) | 0.0141(2)            |
| O1   | 0.48010(8)   | 0.35589(10) | 0.22776(10) | 0.0164(2)            |
| O2   | 0.68848(8)   | 0.07822(10) | 0.08100(10) | 0.0192(2)            |
| O3   | 0.60342(8)   | 0.31981(10) | 0.02721(10) | 0.0175(2)            |
| S1   | 0.64434(3)   | 0.20256(3)  | 0.12655(3)  | 0.01275(12)          |

$U_{eq} = \frac{1}{3}[U_{11}(aa^*)^2 + U_{22}(bb^*)^2 + U_{33}(cc^*)^2 + 2U_{12}aa^*bb^*\cos\gamma + 2U_{13}aa^*cc^*\cos\beta + 2U_{23}bb^*cc^*\cos\alpha]$

**Table 3. Positional Parameters for Hydrogens in Compound 1363**

| Atom | x       | y       | z      | $U_{iso}, \text{Å}^2$ |
|------|---------|---------|--------|-----------------------|
| H2   | 0.0843  | 0.2234  | 0.0730 | 0.028                 |
| H3   | -0.0817 | 0.1054  | 0.0590 | 0.031                 |
| H4   | -0.0814 | -0.0307 | 0.2553 | 0.029                 |
| H5   | 0.0866  | -0.0481 | 0.4652 | 0.030                 |
| H6   | 0.2524  | 0.0720  | 0.4808 | 0.026                 |
| H7a  | 0.3383  | 0.2689  | 0.3881 | 0.024                 |
| H7b  | 0.2720  | 0.3266  | 0.2277 | 0.024                 |
| H8a  | 0.4008  | 0.0700  | 0.3019 | 0.020                 |
| H8b  | 0.3198  | 0.1052  | 0.1389 | 0.020                 |
| H10a | 0.8127  | 0.3047  | 0.2763 | 0.027                 |
| H10b | 0.7736  | 0.1888  | 0.3624 | 0.027                 |
| H10c | 0.7138  | 0.3390  | 0.3320 | 0.027                 |
| H1   | 0.5255  | 0.0514  | 0.1656 | 0.019                 |

**Table 4. Refined Thermal Parameters (U's) for Compound 1363**

| Atom | U <sub>11</sub> | U <sub>22</sub> | U <sub>33</sub> | U <sub>23</sub> | U <sub>13</sub> | U <sub>12</sub> |
|------|-----------------|-----------------|-----------------|-----------------|-----------------|-----------------|
| C1   | 0.0169(7)       | 0.0127(6)       | 0.0213(7)       | -0.0038(5)      | 0.0110(5)       | 0.0017(5)       |
| C2   | 0.0221(7)       | 0.0206(7)       | 0.0212(7)       | 0.0044(6)       | 0.0097(6)       | 0.0006(6)       |
| C3   | 0.0169(7)       | 0.0259(8)       | 0.0233(7)       | 0.0030(6)       | 0.0037(6)       | 0.0000(6)       |
| C4   | 0.0160(7)       | 0.0203(7)       | 0.0329(8)       | 0.0029(6)       | 0.0127(6)       | -0.0001(5)      |
| C5   | 0.0226(7)       | 0.0252(7)       | 0.0250(7)       | 0.0085(6)       | 0.0139(6)       | 0.0050(6)       |
| C6   | 0.0166(7)       | 0.0246(7)       | 0.0177(7)       | 0.0003(6)       | 0.0072(5)       | 0.0043(6)       |
| C7   | 0.0175(7)       | 0.0163(6)       | 0.0227(7)       | -0.0046(6)      | 0.0103(6)       | -0.0011(5)      |
| C8   | 0.0152(6)       | 0.0120(6)       | 0.0183(6)       | -0.0011(5)      | 0.0079(5)       | -0.0009(5)      |
| C9   | 0.0135(6)       | 0.0139(6)       | 0.0110(6)       | 0.0003(5)       | 0.0036(5)       | 0.0008(5)       |
| C10  | 0.0155(6)       | 0.0204(7)       | 0.0156(6)       | -0.0002(5)      | 0.0039(5)       | -0.0008(5)      |
| N1   | 0.0159(5)       | 0.0091(5)       | 0.0198(6)       | -0.0004(4)      | 0.0097(5)       | -0.0017(4)      |
| O1   | 0.0187(5)       | 0.0110(5)       | 0.0209(5)       | -0.0007(4)      | 0.0091(4)       | -0.0005(4)      |
| O2   | 0.0223(5)       | 0.0168(5)       | 0.0233(5)       | -0.0024(4)      | 0.0142(4)       | 0.0003(4)       |
| O3   | 0.0202(5)       | 0.0173(5)       | 0.0150(5)       | 0.0033(4)       | 0.0068(4)       | -0.0012(4)      |
| S1   | 0.01385(18)     | 0.01281(18)     | 0.01300(18)     | 0.00004(11)     | 0.00675(13)     | -0.00054(11)    |

The form of the anisotropic displacement parameter is:  
 $\exp[-2\pi(a^2U_{11}h^2+b^2U_{22}k^2+c^2U_{33}l^2+2b*c*U_{23}kl+2a*c*U_{13}hl+2a*b*U_{12}hk)]$

**Table 5. Bond Distances in Compound 1363, Å**

|       |            |       |            |        |            |
|-------|------------|-------|------------|--------|------------|
| C1-C2 | 1.389(2)   | C1-C6 | 1.3920(19) | C1-C7  | 1.5095(18) |
| C2-C3 | 1.387(2)   | C3-C4 | 1.382(2)   | C4-C5  | 1.384(2)   |
| C5-C6 | 1.388(2)   | C7-C8 | 1.5224(17) | C8-C9  | 1.5044(17) |
| C9-O1 | 1.2152(17) | C9-N1 | 1.3867(17) | C10-S1 | 1.7550(13) |
| N1-S1 | 1.6545(11) | O2-S1 | 1.4336(10) | O3-S1  | 1.4282(9)  |

**Table 6. Bond Angles in Compound 1363, °**

|           |            |           |            |           |            |
|-----------|------------|-----------|------------|-----------|------------|
| C2-C1-C6  | 118.31(13) | C2-C1-C7  | 120.51(12) | C6-C1-C7  | 121.15(12) |
| C3-C2-C1  | 121.08(13) | C4-C3-C2  | 120.19(13) | C3-C4-C5  | 119.31(13) |
| C4-C5-C6  | 120.53(13) | C5-C6-C1  | 120.57(13) | C1-C7-C8  | 111.18(11) |
| C9-C8-C7  | 113.03(11) | O1-C9-N1  | 121.68(12) | O1-C9-C8  | 124.83(12) |
| N1-C9-C8  | 113.43(11) | C9-N1-S1  | 124.27(9)  | O3-S1-O2  | 119.36(6)  |
| O3-S1-N1  | 109.27(6)  | O2-S1-N1  | 104.44(6)  | O3-S1-C10 | 108.65(6)  |
| O2-S1-C10 | 109.50(6)  | N1-S1-C10 | 104.58(6)  |           |            |

---

<sup>i</sup>Bruker (2009) SAINT. Bruker AXS Inc., Madison, Wisconsin, USA.

<sup>ii</sup>Bruker (2009) SHELXTL. Bruker AXS Inc., Madison, Wisconsin, USA.

<sup>iii</sup>Sheldrick, G.M. (2007) SADABS. University of Gottingen, Germany.

<sup>iv</sup>Sheldrick, G.M. (2008) Acta Cryst. A64,112-122.

<sup>v</sup>Sheldrick, G.M. (2008) Acta Cryst. A64,112-122.

<sup>vi</sup> $R1 = \sum |F_o| - |F_c| / \sum |F_o|$

$wR2 = [\sum w(F_o^2 - F_c^2)^2 / \sum w(F_o^2)]^{1/2}$

$GOF = [\sum w(F_o^2 - F_c^2)^2 / (n - p)]^{1/2}$

where n = the number of reflections and p = the number of parameters refined.

<sup>vii</sup>“ORTEP-II: A Fortran Thermal Ellipsoid Plot Program for Crystal Structure Illustrations”. C.K. Johnson (1976) ORNL-5138.



### X-ray Structure Determination of Compound 1410 (i.e., compound 13; CCDC 1427584)

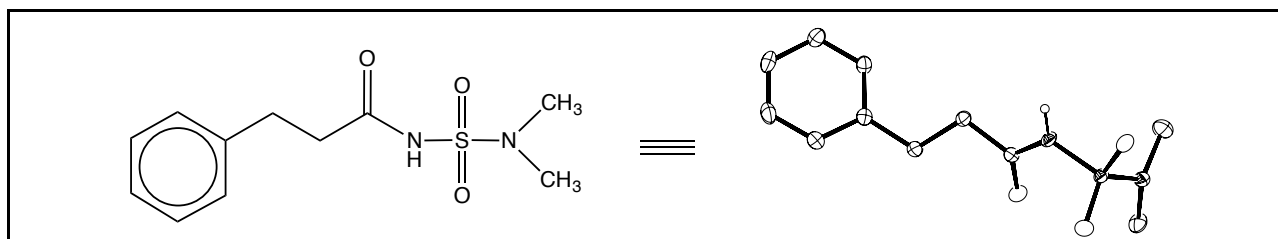

Compound 1410,  $C_{11}H_{16}N_2SO_3$ , crystallizes in the monoclinic space group  $P2_1/n$  (systematic absences  $0k0$ :  $k=\text{odd}$  and  $h0l$ :  $h+l=\text{odd}$ ) with  $a=12.6711(5)\text{\AA}$ ,  $b=6.1568(2)\text{\AA}$ ,  $c=16.4204(6)\text{\AA}$ ,  $\beta=105.324(2)^\circ$ ,  $V=1235.47(8)\text{\AA}^3$ ,  $Z=4$ , and  $d_{\text{calc}}=1.378\text{ g/cm}^3$ . X-ray intensity data were collected on a Bruker APEXII CCD area detector employing graphite-monochromated Mo- $K\alpha$  radiation ( $\lambda=0.71073\text{ \AA}$ ) at a temperature of  $100(1)\text{K}$ . Preliminary indexing was performed from a series of thirty-six  $0.5^\circ$  rotation frames with exposures of 10 seconds. A total of 4133 frames were collected with a crystal to detector distance of 37.4 mm, rotation widths of  $0.5^\circ$  and exposures of 10 seconds:

| scan type | $2\theta$ | $\omega$ | $\phi$ | $\chi$ | frames |
|-----------|-----------|----------|--------|--------|--------|
| $\phi$    | -23.00    | 315.83   | 12.48  | 28.88  | 739    |
| $\omega$  | 12.00     | 323.72   | 290.21 | 72.15  | 101    |
| $\omega$  | -23.00    | 336.19   | 158.99 | -70.01 | 63     |
| $\phi$    | -23.00    | 328.34   | 60.01  | 79.39  | 707    |
| $\phi$    | -23.00    | 334.21   | 38.95  | 73.66  | 739    |
| $\phi$    | 19.50     | 59.55    | 348.71 | -26.26 | 739    |
| $\phi$    | -15.50    | 258.48   | 8.28   | 19.46  | 739    |
| $\phi$    | 19.50     | 327.79   | 15.97  | 36.30  | 306    |

Rotation frames were integrated using SAINT<sup>i</sup>, producing a listing of unaveraged  $F^2$  and  $\sigma(F^2)$  values which were then passed to the SHELXTL<sup>ii</sup> program package for further processing and structure solution. A total of 41272 reflections were measured over the ranges  $1.82 \leq \theta \leq 25.38^\circ$ ,  $-15 \leq h \leq 15$ ,  $-7 \leq k \leq 7$ ,  $-19 \leq l \leq 19$  yielding 2260 unique reflections ( $R_{\text{int}} = 0.0144$ ). The intensity data were corrected for Lorentz and polarization effects and for absorption using SADABS<sup>iii</sup> (minimum and maximum transmission 0.7078, 0.7452).

The structure was solved by direct methods (SHELXS-97<sup>iv</sup>). Refinement was by full-matrix least squares based on  $F^2$  using SHELXL-97.<sup>v</sup> All reflections were used during refinement. The weighting

scheme used was  $w=1/[\sigma^2(F_o^2) + (0.0315P)^2 + 0.7513P]$  where  $P = (F_o^2 + 2F_c^2)/3$ . Non-hydrogen atoms were refined anisotropically and hydrogen atoms were refined using a riding model. Refinement converged to  $R1=0.0262$  and  $wR2=0.0698$  for 2179 observed reflections for which  $F > 4\sigma(F)$  and  $R1=0.0271$  and  $wR2=0.0706$  and  $GOF = 1.096$  for all 2260 unique, non-zero reflections and 157 variables.<sup>vi</sup> The maximum  $\Delta/\sigma$  in the final cycle of least squares was 0.002 and the two most prominent peaks in the final difference Fourier were  $+0.252$  and  $-0.374 \text{ e}/\text{\AA}^3$ .

Table 1. lists cell information, data collection parameters, and refinement data. Final positional and equivalent isotropic thermal parameters are given in Tables 2. and 3. Anisotropic thermal parameters are in Table 4. Tables 5. and 6. list bond distances and bond angles. Figure 1. is an ORTEP<sup>vii</sup> representation of the molecule with 50% probability thermal ellipsoids displayed.

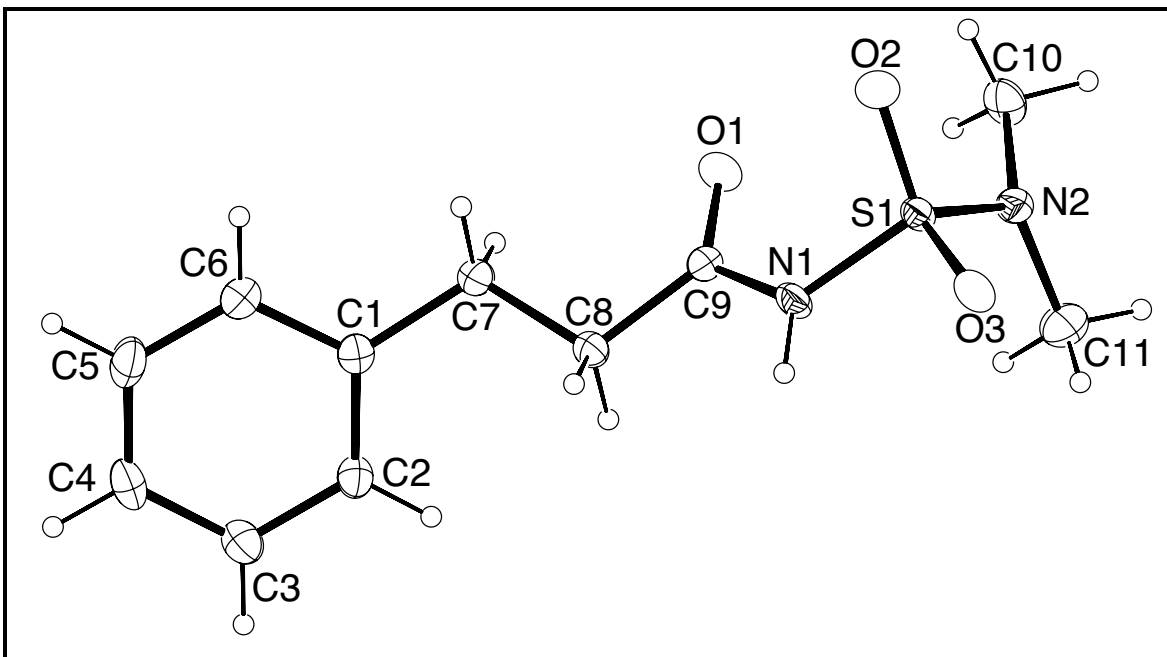

Figure 1. ORTEP drawing of the title compound with 50% probability thermal ellipsoids.

**Table 1. Summary of Structure Determination of Compound 1410**

|                                   |                                                                |
|-----------------------------------|----------------------------------------------------------------|
| Empirical formula                 | C <sub>11</sub> H <sub>16</sub> N <sub>2</sub> SO <sub>3</sub> |
| Formula weight                    | 256.32                                                         |
| Temperature                       | 100(1) K                                                       |
| Wavelength                        | 0.71073 Å                                                      |
| Crystal system                    | monoclinic                                                     |
| Space group                       | P2 <sub>1</sub> /n                                             |
| Cell constants:                   |                                                                |
| a                                 | 12.6711(5) Å                                                   |
| b                                 | 6.1568(2) Å                                                    |
| c                                 | 16.4204(6) Å                                                   |
| β                                 | 105.324(2)°                                                    |
| Volume                            | 1235.47(8) Å <sup>3</sup>                                      |
| Z                                 | 4                                                              |
| Density (calculated)              | 1.378 Mg/m <sup>3</sup>                                        |
| Absorption coefficient            | 0.261 mm <sup>-1</sup>                                         |
| F(000)                            | 544                                                            |
| Crystal size                      | 0.35 x 0.25 x 0.12 mm <sup>3</sup>                             |
| Theta range for data collection   | 1.82 to 25.38°                                                 |
| Index ranges                      | -15 ≤ h ≤ 15, -7 ≤ k ≤ 7, -19 ≤ l ≤ 19                         |
| Reflections collected             | 41272                                                          |
| Independent reflections           | 2260 [R(int) = 0.0144]                                         |
| Completeness to theta = 25.38°    | 99.5 %                                                         |
| Absorption correction             | Semi-empirical from equivalents                                |
| Max. and min. transmission        | 0.7452 and 0.7078                                              |
| Refinement method                 | Full-matrix least-squares on F <sup>2</sup>                    |
| Data / restraints / parameters    | 2260 / 0 / 157                                                 |
| Goodness-of-fit on F <sup>2</sup> | 1.096                                                          |
| Final R indices [I > 2σ(I)]       | R1 = 0.0262, wR2 = 0.0698                                      |
| R indices (all data)              | R1 = 0.0271, wR2 = 0.0706                                      |
| Largest diff. peak and hole       | 0.252 and -0.374 e.Å <sup>-3</sup>                             |

**Table 2. Refined Positional Parameters for Compound 1410**

| Atom | x           | y           | z            | $U_{eq}, \text{Å}^2$ |
|------|-------------|-------------|--------------|----------------------|
| C1   | 0.12155(10) | 0.6376(2)   | 0.24988(8)   | 0.0158(3)            |
| C2   | 0.13900(10) | 0.4780(2)   | 0.19494(8)   | 0.0186(3)            |
| C3   | 0.11527(11) | 0.5156(2)   | 0.10846(8)   | 0.0222(3)            |
| C4   | 0.07363(11) | 0.7144(2)   | 0.07569(9)   | 0.0232(3)            |
| C5   | 0.05388(12) | 0.8733(2)   | 0.12956(9)   | 0.0252(3)            |
| C6   | 0.07713(11) | 0.8350(2)   | 0.21566(9)   | 0.0215(3)            |
| C7   | 0.15588(11) | 0.6079(2)   | 0.34458(8)   | 0.0177(3)            |
| C8   | 0.13508(11) | 0.3835(2)   | 0.37566(8)   | 0.0171(3)            |
| C9   | 0.17193(10) | 0.3733(2)   | 0.47104(8)   | 0.0156(3)            |
| C10  | 0.33601(11) | 0.2670(2)   | 0.69001(9)   | 0.0230(3)            |
| C11  | 0.28081(13) | -0.0970(2)  | 0.62808(10)  | 0.0284(3)            |
| N1   | 0.11631(9)  | 0.22107(18) | 0.50568(7)   | 0.0180(2)            |
| N2   | 0.24696(9)  | 0.11219(18) | 0.65582(7)   | 0.0171(2)            |
| O1   | 0.24451(8)  | 0.48342(16) | 0.51446(6)   | 0.0218(2)            |
| O2   | 0.11203(8)  | 0.40520(15) | 0.64190(6)   | 0.0212(2)            |
| O3   | 0.05061(7)  | 0.02713(16) | 0.60994(6)   | 0.0208(2)            |
| S1   | 0.12733(2)  | 0.19795(5)  | 0.608494(18) | 0.01450(11)          |

$U_{eq} = \frac{1}{3}[U_{11}(aa^*)^2 + U_{22}(bb^*)^2 + U_{33}(cc^*)^2 + 2U_{12}aa^*bb^*\cos \gamma + 2U_{13}aa^*cc^*\cos \beta + 2U_{23}bb^*cc^*\cos \alpha]$

**Table 3. Positional Parameters for Hydrogens in Compound 1410**

| Atom | x      | y       | z      | $U_{iso}, \text{Å}^2$ |
|------|--------|---------|--------|-----------------------|
| H2   | 0.1670 | 0.3439  | 0.2164 | 0.025                 |
| H3   | 0.1274 | 0.4070  | 0.0726 | 0.030                 |
| H4   | 0.0590 | 0.7410  | 0.0180 | 0.031                 |
| H5   | 0.0249 | 1.0065  | 0.1078 | 0.034                 |
| H6   | 0.0629 | 0.9425  | 0.2511 | 0.029                 |
| H7a  | 0.1173 | 0.7138  | 0.3697 | 0.024                 |
| H7b  | 0.2335 | 0.6393  | 0.3647 | 0.024                 |
| H8a  | 0.0576 | 0.3503  | 0.3566 | 0.023                 |
| H8b  | 0.1745 | 0.2758  | 0.3521 | 0.023                 |
| H10a | 0.3848 | 0.2072  | 0.7399 | 0.034                 |
| H10b | 0.3059 | 0.4008  | 0.7038 | 0.034                 |
| H10c | 0.3755 | 0.2941  | 0.6486 | 0.034                 |
| H11a | 0.3056 | -0.0758 | 0.5782 | 0.043                 |
| H11b | 0.2198 | -0.1953 | 0.6158 | 0.043                 |
| H11c | 0.3392 | -0.1568 | 0.6721 | 0.043                 |
| H1   | 0.0733 | 0.1328  | 0.4719 | 0.024                 |

**Table 4. Refined Thermal Parameters (U's) for Compound 1410**

| Atom | U <sub>11</sub> | U <sub>22</sub> | U <sub>33</sub> | U <sub>23</sub> | U <sub>13</sub> | U <sub>12</sub> |
|------|-----------------|-----------------|-----------------|-----------------|-----------------|-----------------|
| C1   | 0.0125(6)       | 0.0176(6)       | 0.0173(6)       | 0.0017(5)       | 0.0042(5)       | -0.0025(5)      |
| C2   | 0.0191(6)       | 0.0188(6)       | 0.0179(6)       | 0.0030(5)       | 0.0045(5)       | 0.0025(5)       |
| C3   | 0.0228(7)       | 0.0261(7)       | 0.0178(7)       | 0.0000(5)       | 0.0055(5)       | 0.0014(6)       |
| C4   | 0.0207(7)       | 0.0312(8)       | 0.0158(6)       | 0.0062(6)       | 0.0013(5)       | -0.0009(6)      |
| C5   | 0.0259(7)       | 0.0212(7)       | 0.0261(7)       | 0.0082(6)       | 0.0024(6)       | 0.0037(6)       |
| C6   | 0.0239(7)       | 0.0177(7)       | 0.0225(7)       | 0.0008(5)       | 0.0054(6)       | 0.0013(5)       |
| C7   | 0.0217(6)       | 0.0156(6)       | 0.0161(6)       | -0.0001(5)      | 0.0055(5)       | -0.0017(5)      |
| C8   | 0.0194(6)       | 0.0167(6)       | 0.0141(6)       | 0.0000(5)       | 0.0023(5)       | -0.0026(5)      |
| C9   | 0.0165(6)       | 0.0139(6)       | 0.0160(6)       | -0.0003(5)      | 0.0039(5)       | 0.0004(5)       |
| C10  | 0.0173(6)       | 0.0280(7)       | 0.0200(7)       | 0.0012(6)       | -0.0017(5)      | -0.0054(6)      |
| C11  | 0.0327(8)       | 0.0222(7)       | 0.0297(8)       | -0.0028(6)      | 0.0068(6)       | 0.0081(6)       |
| N1   | 0.0215(6)       | 0.0196(6)       | 0.0109(5)       | -0.0010(4)      | 0.0005(4)       | -0.0072(4)      |
| N2   | 0.0176(5)       | 0.0159(5)       | 0.0162(5)       | -0.0011(4)      | 0.0016(4)       | 0.0003(4)       |
| O1   | 0.0241(5)       | 0.0228(5)       | 0.0167(5)       | -0.0023(4)      | 0.0025(4)       | -0.0090(4)      |
| O2   | 0.0227(5)       | 0.0199(5)       | 0.0211(5)       | -0.0035(4)      | 0.0059(4)       | 0.0026(4)       |
| O3   | 0.0214(5)       | 0.0256(5)       | 0.0149(5)       | 0.0000(4)       | 0.0038(4)       | -0.0084(4)      |
| S1   | 0.01500(17)     | 0.01621(18)     | 0.01173(17)     | -0.00085(11)    | 0.00251(12)     | -0.00200(11)    |

The form of the anisotropic displacement parameter is:

$$\exp[-2\pi(a^2U_{11}h^2+b^2U_{22}k^2+c^2U_{33}l^2+2b*c*U_{23}kl+2a*c*U_{13}hl+2a*b*U_{12}hk)]$$

**Table 5. Bond Distances in Compound 1410, Å**

|        |            |       |            |        |            |
|--------|------------|-------|------------|--------|------------|
| C1-C2  | 1.3905(18) | C1-C6 | 1.3940(18) | C1-C7  | 1.5110(17) |
| C2-C3  | 1.3911(18) | C3-C4 | 1.384(2)   | C4-C5  | 1.386(2)   |
| C5-C6  | 1.386(2)   | C7-C8 | 1.5198(17) | C8-C9  | 1.5126(17) |
| C9-O1  | 1.2114(16) | C9-N1 | 1.3821(17) | C10-N2 | 1.4704(17) |
| C11-N2 | 1.4675(17) | N1-S1 | 1.6629(11) | N2-S1  | 1.5994(11) |
| O2-S1  | 1.4222(10) | O3-S1 | 1.4366(9)  |        |            |

**Table 6. Bond Angles in Compound 1410, °**

|           |            |           |            |            |            |
|-----------|------------|-----------|------------|------------|------------|
| C2-C1-C6  | 118.12(12) | C2-C1-C7  | 122.03(12) | C6-C1-C7   | 119.73(12) |
| C1-C2-C3  | 121.06(13) | C4-C3-C2  | 120.10(13) | C3-C4-C5   | 119.40(13) |
| C4-C5-C6  | 120.36(13) | C5-C6-C1  | 120.92(13) | C1-C7-C8   | 115.28(11) |
| C9-C8-C7  | 110.63(10) | O1-C9-N1  | 121.85(12) | O1-C9-C8   | 124.37(11) |
| N1-C9-C8  | 113.77(11) | C9-N1-S1  | 124.11(9)  | C11-N2-C10 | 115.45(11) |
| C11-N2-S1 | 117.14(9)  | C10-N2-S1 | 120.31(9)  | O2-S1-O3   | 119.25(6)  |
| O2-S1-N2  | 108.49(6)  | O3-S1-N2  | 107.99(6)  | O2-S1-N1   | 109.35(6)  |
| O3-S1-N1  | 101.76(5)  | N2-S1-N1  | 109.63(6)  |            |            |



---

<sup>i</sup>Bruker (2009) SAINT. Bruker AXS Inc., Madison, Wisconsin, USA.

<sup>ii</sup>Bruker (2009) SHELXTL. Bruker AXS Inc., Madison, Wisconsin, USA.

<sup>iii</sup>Sheldrick, G.M. (2007) SADABS. University of Gottingen, Germany.

<sup>iv</sup>Sheldrick, G.M. (2008) Acta Cryst. A64,112-122.

<sup>v</sup>Sheldrick, G.M. (2008) Acta Cryst. A64,112-122.

<sup>vi</sup> $R1 = \sum |F_o| - |F_c| / \sum |F_o|$

$wR2 = [\sum w(F_o^2 - F_c^2)^2 / \sum w(F_o^2)]^{1/2}$

$GOF = [\sum w(F_o^2 - F_c^2)^2 / (n - p)]^{1/2}$

where n = the number of reflections and p = the number of parameters refined.

<sup>vii</sup>“ORTEP-II: A Fortran Thermal Ellipsoid Plot Program for Crystal Structure Illustrations”. C.K. Johnson (1976) ORNL-5138.

### X-ray Structure Determination of Compound 1390 (i.e., compound 14; CCDC 1427791)

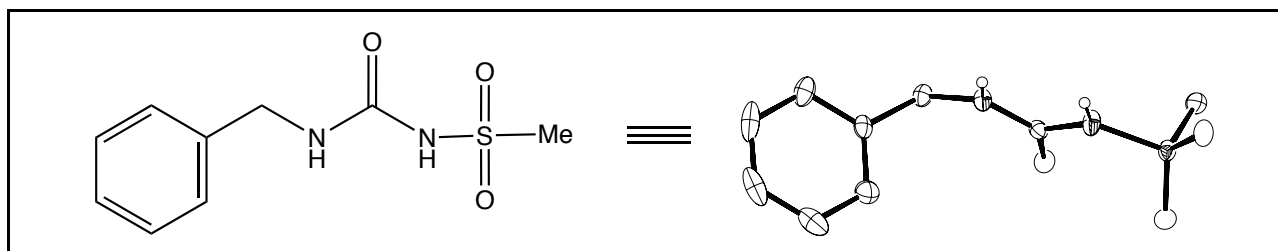

Compound 1390,  $C_9H_{12}N_2SO_3$ , crystallizes in the monoclinic space group  $P2_1/c$  (systematic absences  $0k0$ :  $k=\text{odd}$  and  $h0l$ :  $l=\text{odd}$ ) with  $a=12.2842(6)\text{\AA}$ ,  $b=9.0172(5)\text{\AA}$ ,  $c=9.8657(5)\text{\AA}$ ,  $\beta=105.348(2)^\circ$ ,  $V=1053.84(9)\text{\AA}^3$ ,  $Z=4$ , and  $d_{\text{calc}}=1.439\text{ g/cm}^3$ . X-ray intensity data were collected on a Bruker APEXII CCD area detector employing graphite-monochromated Mo- $K\alpha$  radiation ( $\lambda=0.71073\text{ \AA}$ ) at a temperature of  $100(1)\text{K}$ . Preliminary indexing was performed from a series of thirty-six  $0.5^\circ$  rotation frames with exposures of 10 seconds. A total of 1608 frames were collected with a crystal to detector distance of 37.3 mm, rotation widths of  $0.5^\circ$  and exposures of 5 seconds:

| scan type | $2\theta$ | $\omega$ | $\phi$ | $\chi$ | frames |
|-----------|-----------|----------|--------|--------|--------|
| $\phi$    | -23.00    | 315.83   | 12.48  | 28.88  | 739    |
| $\omega$  | -3.00     | 49.59    | 217.86 | -28.13 | 63     |
| $\omega$  | -20.50    | 332.84   | 178.64 | -31.86 | 205    |
| $\omega$  | -10.50    | 306.95   | 272.07 | 99.72  | 80     |
| $\omega$  | 17.00     | 321.08   | 318.36 | 83.36  | 117    |
| $\phi$    | 22.00     | 14.84    | 240.01 | 97.50  | 404    |

Rotation frames were integrated using SAINT<sup>i</sup>, producing a listing of unaveraged  $F^2$  and  $\sigma(F^2)$  values which were then passed to the SHELXTL<sup>ii</sup> program package for further processing and structure solution. A total of 14270 reflections were measured over the ranges  $1.72 \leq \theta \leq 25.44^\circ$ ,  $-14 \leq h \leq 14$ ,  $-10 \leq k \leq 10$ ,  $-11 \leq l \leq 11$  yielding 1944 unique reflections ( $R_{\text{int}} = 0.0183$ ). The intensity data were corrected for Lorentz and polarization effects and for absorption using SADABS<sup>iii</sup> (minimum and maximum transmission 0.6856, 0.7452).

The structure was solved by direct methods (SHELXS-97<sup>iv</sup>). Refinement was by full-matrix least squares based on  $F^2$  using SHELXL-97.<sup>v</sup> All reflections were used during refinement. The weighting scheme used was  $w=1/[\sigma^2(F_o^2) + (0.0386P)^2 + 0.6825P]$  where  $P = (F_o^2 + 2F_c^2)/3$ . Non-hydrogen atoms

were refined anisotropically and hydrogen atoms were refined using a riding model. Refinement converged to  $R1=0.0271$  and  $wR2=0.0715$  for 1762 observed reflections for which  $F > 4\sigma(F)$  and  $R1=0.0306$  and  $wR2=0.0746$  and  $GOF = 1.019$  for all 1944 unique, non-zero reflections and 138 variables.<sup>vi</sup> The maximum  $\Delta/\sigma$  in the final cycle of least squares was 0.000 and the two most prominent peaks in the final difference Fourier were  $+0.310$  and  $-0.378 \text{ e}/\text{\AA}^3$ .

Table 1. lists cell information, data collection parameters, and refinement data. Final positional and equivalent isotropic thermal parameters are given in Tables 2. and 3. Anisotropic thermal parameters are in Table 4. Tables 5. and 6. list bond distances and bond angles. Figure 1. is an ORTEP<sup>vii</sup> representation of the molecule with 50% probability thermal ellipsoids displayed.

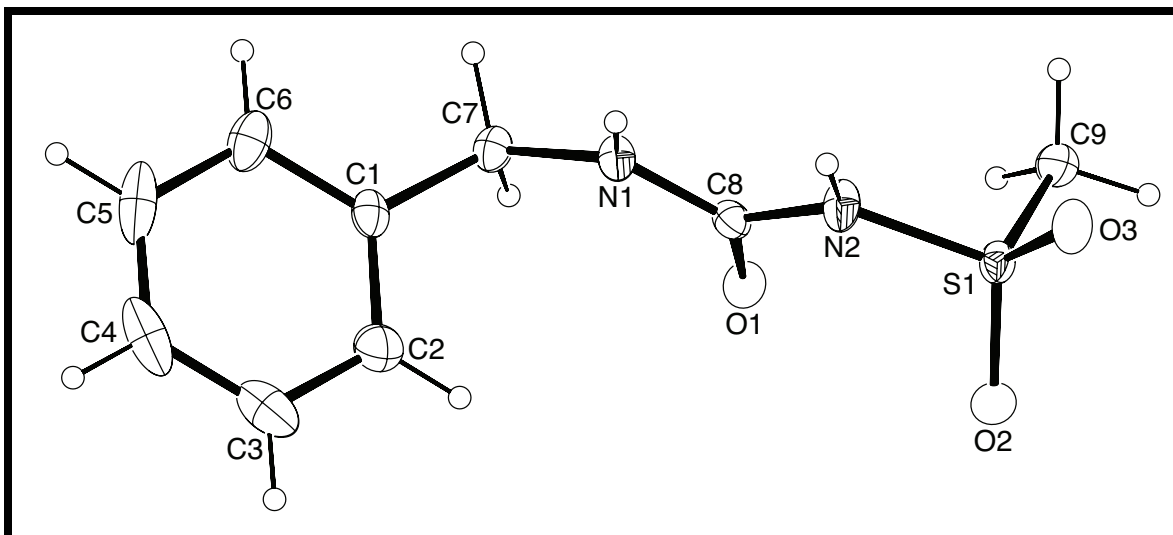

Figure 1. ORTEP drawing of the title compound with 50% probability thermal ellipsoids.

**Table 1. Summary of Structure Determination of Compound 1390**

|                                   |                                                               |
|-----------------------------------|---------------------------------------------------------------|
| Empirical formula                 | C <sub>9</sub> H <sub>12</sub> N <sub>2</sub> SO <sub>3</sub> |
| Formula weight                    | 228.27                                                        |
| Temperature                       | 100(1) K                                                      |
| Wavelength                        | 0.71073 Å                                                     |
| Crystal system                    | monoclinic                                                    |
| Space group                       | P2 <sub>1</sub> /c                                            |
| Cell constants:                   |                                                               |
| a                                 | 12.2842(6) Å                                                  |
| b                                 | 9.0172(5) Å                                                   |
| c                                 | 9.8657(5) Å                                                   |
| β                                 | 105.348(2)°                                                   |
| Volume                            | 1053.84(9) Å <sup>3</sup>                                     |
| Z                                 | 4                                                             |
| Density (calculated)              | 1.439 Mg/m <sup>3</sup>                                       |
| Absorption coefficient            | 0.296 mm <sup>-1</sup>                                        |
| F(000)                            | 480                                                           |
| Crystal size                      | 0.38 x 0.20 x 0.04 mm <sup>3</sup>                            |
| Theta range for data collection   | 1.72 to 25.44°                                                |
| Index ranges                      | -14 ≤ h ≤ 14, -10 ≤ k ≤ 10, -11 ≤ l ≤ 11                      |
| Reflections collected             | 14270                                                         |
| Independent reflections           | 1944 [R(int) = 0.0183]                                        |
| Completeness to theta = 25.44°    | 99.9 %                                                        |
| Absorption correction             | Semi-empirical from equivalents                               |
| Max. and min. transmission        | 0.7452 and 0.6856                                             |
| Refinement method                 | Full-matrix least-squares on F <sup>2</sup>                   |
| Data / restraints / parameters    | 1944 / 0 / 138                                                |
| Goodness-of-fit on F <sup>2</sup> | 1.019                                                         |
| Final R indices [I > 2σ(I)]       | R1 = 0.0271, wR2 = 0.0715                                     |
| R indices (all data)              | R1 = 0.0306, wR2 = 0.0746                                     |
| Largest diff. peak and hole       | 0.310 and -0.378 e.Å <sup>-3</sup>                            |

**Table 2. Refined Positional Parameters for Compound 1390**

| Atom | x           | y           | z           | $U_{eq}, \text{Å}^2$ |
|------|-------------|-------------|-------------|----------------------|
| C1   | 0.22648(12) | 0.14280(15) | 0.32580(16) | 0.0177(3)            |
| C2   | 0.18355(13) | 0.18325(18) | 0.18633(17) | 0.0269(4)            |
| C3   | 0.07277(14) | 0.1534(2)   | 0.1159(2)   | 0.0362(4)            |
| C4   | 0.00343(14) | 0.0819(2)   | 0.1834(2)   | 0.0384(5)            |
| C5   | 0.04478(15) | 0.0403(2)   | 0.3215(2)   | 0.0359(4)            |
| C6   | 0.15646(13) | 0.07055(17) | 0.39320(17) | 0.0251(3)            |
| C7   | 0.34784(12) | 0.17625(16) | 0.40038(15) | 0.0178(3)            |
| C8   | 0.49693(11) | 0.20341(15) | 0.27977(14) | 0.0155(3)            |
| C9   | 0.76732(12) | 0.26864(17) | 0.31896(15) | 0.0210(3)            |
| N1   | 0.42484(9)  | 0.11844(13) | 0.32387(12) | 0.0162(3)            |
| N2   | 0.57010(10) | 0.12481(13) | 0.22080(13) | 0.0193(3)            |
| O1   | 0.50180(8)  | 0.33956(11) | 0.28765(11) | 0.0191(2)            |
| O2   | 0.63144(8)  | 0.32269(11) | 0.07654(10) | 0.0188(2)            |
| O3   | 0.72156(9)  | 0.07673(11) | 0.11313(11) | 0.0225(2)            |
| S1   | 0.67231(3)  | 0.19962(4)  | 0.16686(4)  | 0.01571(12)          |

$U_{eq} = \frac{1}{3}[U_{11}(aa^*)^2 + U_{22}(bb^*)^2 + U_{33}(cc^*)^2 + 2U_{12}aa^*bb^*\cos\gamma + 2U_{13}aa^*cc^*\cos\beta + 2U_{23}bb^*cc^*\cos\alpha]$

**Table 3. Positional Parameters for Hydrogens in Compound 1390**

| Atom | x       | y       | z      | $U_{iso}, \text{Å}^2$ |
|------|---------|---------|--------|-----------------------|
| H2   | 0.2300  | 0.2311  | 0.1395 | 0.036                 |
| H3   | 0.0451  | 0.1818  | 0.0225 | 0.048                 |
| H4   | -0.0712 | 0.0618  | 0.1360 | 0.051                 |
| H5   | -0.0020 | -0.0083 | 0.3673 | 0.048                 |
| H6   | 0.1839  | 0.0420  | 0.4866 | 0.033                 |
| H7a  | 0.3578  | 0.2827  | 0.4109 | 0.024                 |
| H7b  | 0.3659  | 0.1327  | 0.4936 | 0.024                 |
| H9a  | 0.8294  | 0.3159  | 0.2942 | 0.031                 |
| H9b  | 0.7951  | 0.1884  | 0.3827 | 0.031                 |
| H9c  | 0.7295  | 0.3394  | 0.3633 | 0.031                 |
| H1a  | 0.4237  | 0.0249  | 0.3064 | 0.022                 |
| H2a  | 0.5610  | 0.0304  | 0.2121 | 0.026                 |

**Table 4. Refined Thermal Parameters (U's) for Compound 1390**

| Atom | U <sub>11</sub> | U <sub>22</sub> | U <sub>33</sub> | U <sub>23</sub> | U <sub>13</sub> | U <sub>12</sub> |
|------|-----------------|-----------------|-----------------|-----------------|-----------------|-----------------|
| C1   | 0.0160(7)       | 0.0123(7)       | 0.0267(7)       | -0.0017(6)      | 0.0091(6)       | 0.0019(5)       |
| C2   | 0.0230(8)       | 0.0250(8)       | 0.0319(9)       | 0.0068(7)       | 0.0059(7)       | 0.0012(6)       |
| C3   | 0.0257(9)       | 0.0352(10)      | 0.0406(10)      | 0.0011(8)       | -0.0035(7)      | 0.0064(7)       |
| C4   | 0.0158(8)       | 0.0384(10)      | 0.0582(12)      | -0.0168(9)      | 0.0049(8)       | 0.0029(7)       |
| C5   | 0.0274(9)       | 0.0307(9)       | 0.0594(12)      | -0.0164(9)      | 0.0289(9)       | -0.0098(7)      |
| C6   | 0.0281(8)       | 0.0210(8)       | 0.0317(8)       | -0.0062(6)      | 0.0175(7)       | -0.0043(6)      |
| C7   | 0.0181(7)       | 0.0167(7)       | 0.0205(7)       | -0.0012(6)      | 0.0084(6)       | -0.0005(6)      |
| C8   | 0.0132(6)       | 0.0138(7)       | 0.0187(7)       | 0.0010(5)       | 0.0030(5)       | 0.0014(5)       |
| C9   | 0.0182(7)       | 0.0233(8)       | 0.0209(7)       | 0.0036(6)       | 0.0042(6)       | -0.0023(6)      |
| N1   | 0.0149(6)       | 0.0117(6)       | 0.0233(6)       | -0.0020(5)      | 0.0071(5)       | -0.0007(4)      |
| N2   | 0.0181(6)       | 0.0094(6)       | 0.0338(7)       | -0.0010(5)      | 0.0129(5)       | -0.0017(5)      |
| O1   | 0.0210(5)       | 0.0110(5)       | 0.0277(6)       | 0.0011(4)       | 0.0106(4)       | 0.0012(4)       |
| O2   | 0.0210(5)       | 0.0160(5)       | 0.0197(5)       | 0.0013(4)       | 0.0057(4)       | -0.0001(4)      |
| O3   | 0.0212(5)       | 0.0173(5)       | 0.0331(6)       | -0.0013(4)      | 0.0142(4)       | 0.0014(4)       |
| S1   | 0.01455(19)     | 0.01281(19)     | 0.0212(2)       | 0.00039(13)     | 0.00724(14)     | -0.00045(12)    |

The form of the anisotropic displacement parameter is:  
 $\exp[-2\pi(a^2U_{11}h^2+b^2U_{22}k^2+c^2U_{33}l^2+2b^*c^*U_{23}kl+2a^*c^*U_{13}hl+2a^*b^*U_{12}hk)]$

**Table 5. Bond Distances in Compound 1390, Å**

|       |            |       |            |       |            |
|-------|------------|-------|------------|-------|------------|
| C1-C6 | 1.382(2)   | C1-C2 | 1.386(2)   | C1-C7 | 1.508(2)   |
| C2-C3 | 1.381(2)   | C3-C4 | 1.373(3)   | C4-C5 | 1.374(3)   |
| C5-C6 | 1.394(2)   | C7-N1 | 1.4540(17) | C8-O1 | 1.2305(17) |
| C8-N1 | 1.3284(18) | C8-N2 | 1.3877(18) | C9-S1 | 1.7534(15) |
| N2-S1 | 1.6335(12) | O2-S1 | 1.4286(10) | O3-S1 | 1.4299(11) |

**Table 6. Bond Angles in Compound 1390, °**

|          |            |          |            |          |            |
|----------|------------|----------|------------|----------|------------|
| C6-C1-C2 | 118.69(14) | C6-C1-C7 | 121.36(14) | C2-C1-C7 | 119.94(13) |
| C3-C2-C1 | 120.92(16) | C4-C3-C2 | 120.17(17) | C3-C4-C5 | 119.68(16) |
| C4-C5-C6 | 120.39(16) | C1-C6-C5 | 120.15(16) | N1-C7-C1 | 111.71(11) |
| O1-C8-N1 | 125.47(13) | O1-C8-N2 | 120.66(13) | N1-C8-N2 | 113.87(12) |
| C8-N1-C7 | 123.02(12) | C8-N2-S1 | 124.38(10) | O2-S1-O3 | 118.95(6)  |
| O2-S1-N2 | 110.52(6)  | O3-S1-N2 | 103.76(6)  | O2-S1-C9 | 107.61(7)  |
| O3-S1-C9 | 109.95(7)  | N2-S1-C9 | 105.23(7)  |          |            |

---

<sup>i</sup>Bruker (2009) SAINT. Bruker AXS Inc., Madison, Wisconsin, USA.

<sup>ii</sup>Bruker (2009) SHELXTL. Bruker AXS Inc., Madison, Wisconsin, USA.

<sup>iii</sup>Sheldrick, G.M. (2007) SADABS. University of Gottingen, Germany.

<sup>iv</sup>Sheldrick, G.M. (2008) Acta Cryst. A64,112-122.

<sup>v</sup>Sheldrick, G.M. (2008) Acta Cryst. A64,112-122.

<sup>vi</sup> $R1 = \sum |F_o| - |F_c| / \sum |F_o|$

$wR2 = [\sum w(F_o^2 - F_c^2)^2 / \sum w(F_o^2)]^{1/2}$

$GOF = [\sum w(F_o^2 - F_c^2)^2 / (n - p)]^{1/2}$

where n = the number of reflections and p = the number of parameters refined.

<sup>vii</sup>“ORTEP-II: A Fortran Thermal Ellipsoid Plot Program for Crystal Structure Illustrations”. C.K. Johnson (1976) ORNL-5138.

### X-ray Structure Determination of Compound 1356 (i.e., compound 15; CCDC 1428191)

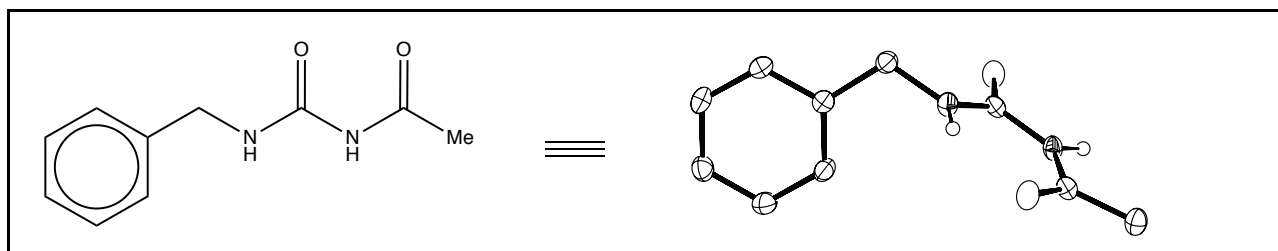

Compound 1356,  $C_{10}H_{12}N_2O_2$ , crystallizes in the triclinic space group  $P\bar{1}$  with  $a=9.8278(3)\text{\AA}$ ,  $b=9.9383(2)\text{\AA}$ ,  $c=10.3889(3)\text{\AA}$ ,  $\alpha=77.6710(10)^\circ$ ,  $\beta=86.2200(10)^\circ$ ,  $\gamma=80.5480(10)^\circ$ ,  $V=977.34(5)\text{\AA}^3$ ,  $Z=4$ , and  $d_{\text{calc}}=1.306\text{ g/cm}^3$ . X-ray intensity data were collected on a Bruker APEXII CCD area detector employing graphite-monochromated Mo-K $\alpha$  radiation ( $\lambda=0.71073\text{ \AA}$ ) at a temperature of 100(1)K. Preliminary indexing was performed from a series of thirty-six  $0.5^\circ$  rotation frames with exposures of 10 seconds. A total of 1498 frames were collected with a crystal to detector distance of 37.6 mm, rotation widths of  $0.5^\circ$  and exposures of 5 seconds:

| scan type | $2\theta$ | $\omega$ | $\phi$ | $\chi$ | frames |
|-----------|-----------|----------|--------|--------|--------|
| $\phi$    | -23.00    | 315.83   | 12.48  | 28.88  | 739    |
| $\omega$  | -23.00    | 333.59   | 158.99 | -70.01 | 68     |
| $\omega$  | -5.50     | 322.57   | 133.99 | 70.63  | 68     |
| $\phi$    | -10.50    | 300.13   | 74.42  | 39.97  | 623    |

Rotation frames were integrated using SAINT<sup>i</sup>, producing a listing of unaveraged  $F^2$  and  $\sigma(F^2)$  values which were then passed to the SHELXTL<sup>ii</sup> program package for further processing and structure solution. A total of 12642 reflections were measured over the ranges  $2.01 \leq \theta \leq 25.40^\circ$ ,  $-11 \leq h \leq 11$ ,  $-11 \leq k \leq 11$ ,  $-12 \leq l \leq 12$  yielding 3571 unique reflections ( $R_{\text{int}} = 0.0161$ ). The intensity data were corrected for Lorentz and polarization effects and for absorption using SADABS<sup>iii</sup> (minimum and maximum transmission 0.7007, 0.7452).

The structure was solved by direct methods (SHELXS-97<sup>iv</sup>). The asymmetric unit consists of two molecules which exhibit hydrogen-bonding with each other (see Figure 1.). Refinement was by full-matrix least squares based on  $F^2$  using SHELXL-97.<sup>v</sup> All reflections were used during refinement. The weighting scheme used was  $w=1/[\sigma^2(F_o^2) + (0.0401P)^2 + 0.3392P]$  where  $P = (F_o^2 + 2F_c^2)/3$ . Non-hydrogen atoms



were refined anisotropically and hydrogen atoms were refined using a riding model. Refinement converged to  $R1=0.0311$  and  $wR2=0.0815$  for 3331 observed reflections for which  $F > 4\sigma(F)$  and  $R1=0.0334$  and  $wR2=0.0835$  and  $GOF = 1.055$  for all 3571 unique, non-zero reflections and 256 variables.<sup>vi</sup> The maximum  $\Delta/\sigma$  in the final cycle of least squares was 0.001 and the two most prominent peaks in the final difference Fourier were  $+0.247$  and  $-0.243 \text{ e}/\text{\AA}^3$ .

Table 1. lists cell information, data collection parameters, and refinement data. Final positional and equivalent isotropic thermal parameters are given in Tables 2. and 3. Anisotropic thermal parameters are in Table 4. Tables 5. and 6. list bond distances and bond angles. Figure 1. is an ORTEP<sup>vii</sup> representation of the molecule with 50% probability thermal ellipsoids displayed.

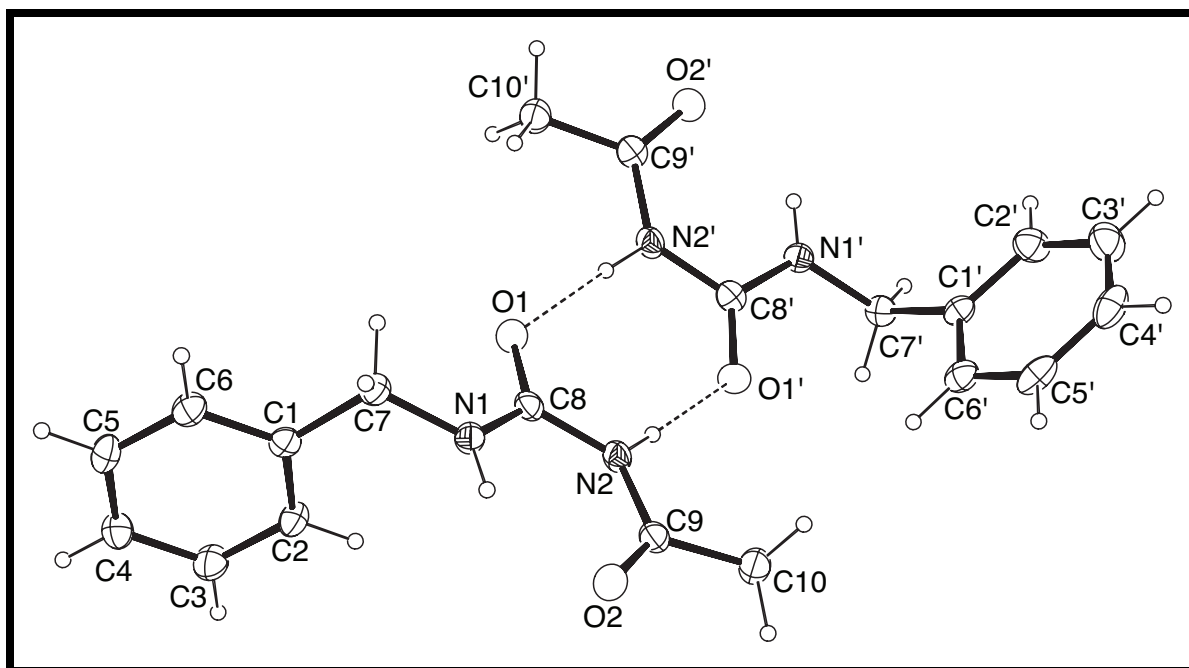

Figure 1. ORTEP drawing of the two molecules in the asymmetric unit with 50% probability thermal ellipsoids.

**Table 1. Summary of Structure Determination of Compound 1356**

|                                   |                                                               |
|-----------------------------------|---------------------------------------------------------------|
| Empirical formula                 | C <sub>10</sub> H <sub>12</sub> N <sub>2</sub> O <sub>2</sub> |
| Formula weight                    | 192.22                                                        |
| Temperature                       | 100(1) K                                                      |
| Wavelength                        | 0.71073 Å                                                     |
| Crystal system                    | triclinic                                                     |
| Space group                       | P $\bar{1}$                                                   |
| Cell constants:                   |                                                               |
| a                                 | 9.8278(3) Å                                                   |
| b                                 | 9.9383(2) Å                                                   |
| c                                 | 10.3889(3) Å                                                  |
| $\alpha$                          | 77.6710(10)°                                                  |
| $\beta$                           | 86.2200(10)°                                                  |
| $\gamma$                          | 80.5480(10)°                                                  |
| Volume                            | 977.34(5) Å <sup>3</sup>                                      |
| Z                                 | 4                                                             |
| Density (calculated)              | 1.306 Mg/m <sup>3</sup>                                       |
| Absorption coefficient            | 0.093 mm <sup>-1</sup>                                        |
| F(000)                            | 408                                                           |
| Crystal size                      | 0.35 x 0.25 x 0.20 mm <sup>3</sup>                            |
| Theta range for data collection   | 2.01 to 25.40°                                                |
| Index ranges                      | -11 ≤ h ≤ 11, -11 ≤ k ≤ 11, -12 ≤ l ≤ 12                      |
| Reflections collected             | 12642                                                         |
| Independent reflections           | 3571 [R(int) = 0.0161]                                        |
| Completeness to theta = 25.40°    | 99.4 %                                                        |
| Absorption correction             | Semi-empirical from equivalents                               |
| Max. and min. transmission        | 0.7452 and 0.7007                                             |
| Refinement method                 | Full-matrix least-squares on F <sup>2</sup>                   |
| Data / restraints / parameters    | 3571 / 0 / 256                                                |
| Goodness-of-fit on F <sup>2</sup> | 1.055                                                         |
| Final R indices [I > 2σ(I)]       | R1 = 0.0311, wR2 = 0.0815                                     |
| R indices (all data)              | R1 = 0.0334, wR2 = 0.0835                                     |
| Largest diff. peak and hole       | 0.247 and -0.243 e.Å <sup>-3</sup>                            |

Table 2. Refined Positional Parameters for Compound 1356

| Atom | x           | y           | z            | U <sub>eq</sub> , Å <sup>2</sup> |
|------|-------------|-------------|--------------|----------------------------------|
| C1   | 0.56909(11) | 0.34331(11) | 0.17531(11)  | 0.0176(2)                        |
| C2   | 0.70809(11) | 0.31055(12) | 0.14385(11)  | 0.0216(2)                        |
| C3   | 0.74993(12) | 0.26950(13) | 0.02598(12)  | 0.0256(3)                        |
| C4   | 0.65303(12) | 0.26125(12) | -0.06180(11) | 0.0237(3)                        |
| C5   | 0.51408(12) | 0.29456(12) | -0.03129(11) | 0.0238(3)                        |
| C6   | 0.47277(11) | 0.33483(12) | 0.08631(11)  | 0.0223(2)                        |
| C7   | 0.51669(11) | 0.38989(12) | 0.30143(11)  | 0.0199(2)                        |
| C8   | 0.67682(11) | 0.48286(11) | 0.41500(10)  | 0.0177(2)                        |
| C9   | 0.82641(11) | 0.33424(11) | 0.59323(11)  | 0.0191(2)                        |
| C10  | 0.92519(12) | 0.34907(12) | 0.69184(11)  | 0.0238(3)                        |
| N1   | 0.62175(10) | 0.37503(9)  | 0.39762(9)   | 0.0190(2)                        |
| N2   | 0.77610(10) | 0.45701(9)  | 0.51188(9)   | 0.0186(2)                        |
| O1   | 0.64643(8)  | 0.60370(8)  | 0.35261(8)   | 0.02305(19)                      |
| O2   | 0.79275(9)  | 0.22209(8)  | 0.58883(8)   | 0.0253(2)                        |
| C1'  | 0.91260(10) | 0.84249(11) | 0.80654(11)  | 0.0188(2)                        |
| C2'  | 0.87270(12) | 0.93585(13) | 0.88914(12)  | 0.0263(3)                        |
| C3'  | 0.83257(13) | 0.88955(14) | 1.01943(13)  | 0.0316(3)                        |
| C4'  | 0.83164(12) | 0.74924(14) | 1.06875(12)  | 0.0286(3)                        |
| C5'  | 0.87246(12) | 0.65506(13) | 0.98771(12)  | 0.0266(3)                        |
| C6'  | 0.91317(11) | 0.70116(12) | 0.85747(12)  | 0.0221(2)                        |
| C7'  | 0.95469(11) | 0.89478(11) | 0.66439(11)  | 0.0196(2)                        |
| C8'  | 0.81147(11) | 0.81357(11) | 0.52421(11)  | 0.0187(2)                        |
| C9'  | 0.62386(11) | 0.96747(11) | 0.38765(11)  | 0.0197(2)                        |
| C10' | 0.52430(13) | 0.96314(12) | 0.28532(12)  | 0.0250(3)                        |
| N1'  | 0.84159(9)  | 0.91778(9)  | 0.57351(9)   | 0.0187(2)                        |
| N2'  | 0.70588(10) | 0.84279(9)  | 0.43334(9)   | 0.0199(2)                        |
| O1'  | 0.87301(8)  | 0.69286(8)  | 0.55306(8)   | 0.02338(19)                      |
| O2'  | 0.63232(8)  | 1.07367(8)  | 0.42606(8)   | 0.02349(19)                      |

U<sub>eq</sub> =  $\frac{1}{3}[U_{11}(aa^*)^2 + U_{22}(bb^*)^2 + U_{33}(cc^*)^2 + 2U_{12}aa^*bb^*\cos\gamma + 2U_{13}aa^*cc^*\cos\beta + 2U_{23}bb^*cc^*\cos\alpha]$

**Table 3. Positional Parameters for Hydrogens in Compound 1356**

| Atom  | x      | y      | z       | $U_{iso}, \text{Å}^2$ |
|-------|--------|--------|---------|-----------------------|
| H2    | 0.7738 | 0.3161 | 0.2021  | 0.029                 |
| H3    | 0.8435 | 0.2474 | 0.0059  | 0.034                 |
| H4    | 0.6811 | 0.2335 | -0.1407 | 0.032                 |
| H5    | 0.4484 | 0.2898 | -0.0900 | 0.032                 |
| H6    | 0.3792 | 0.3566 | 0.1063  | 0.030                 |
| H7a   | 0.4748 | 0.4870 | 0.2796  | 0.026                 |
| H7b   | 0.4452 | 0.3363 | 0.3414  | 0.026                 |
| H10a  | 0.8744 | 0.3836 | 0.7633  | 0.036                 |
| H10b  | 0.9857 | 0.4132 | 0.6500  | 0.036                 |
| H10c  | 0.9786 | 0.2599 | 0.7253  | 0.036                 |
| H1    | 0.6491 | 0.2939 | 0.4447  | 0.025                 |
| H2a   | 0.8101 | 0.5286 | 0.5214  | 0.025                 |
| H2'   | 0.8729 | 1.0306 | 0.8567  | 0.035                 |
| H3'   | 0.8062 | 0.9532 | 1.0737  | 0.042                 |
| H4'   | 0.8038 | 0.7182 | 1.1559  | 0.038                 |
| H5'   | 0.8726 | 0.5604 | 1.0207  | 0.035                 |
| H6'   | 0.9410 | 0.6371 | 0.8039  | 0.029                 |
| H7a'  | 0.9902 | 0.9816 | 0.6573  | 0.026                 |
| H7b'  | 1.0287 | 0.8276 | 0.6382  | 0.026                 |
| H10a' | 0.4459 | 1.0344 | 0.2877  | 0.038                 |
| H10b' | 0.4944 | 0.8735 | 0.3033  | 0.038                 |
| H10c' | 0.5690 | 0.9788 | 0.1996  | 0.038                 |
| H1'   | 0.7941 | 0.9995 | 0.5517  | 0.025                 |
| H2a'  | 0.6905 | 0.7734 | 0.4021  | 0.026                 |

**Table 4. Refined Thermal Parameters (U's) for Compound 1356**

| Atom | U <sub>11</sub> | U <sub>22</sub> | U <sub>33</sub> | U <sub>23</sub> | U <sub>13</sub> | U <sub>12</sub> |
|------|-----------------|-----------------|-----------------|-----------------|-----------------|-----------------|
| C1   | 0.0201(5)       | 0.0127(5)       | 0.0192(5)       | -0.0005(4)      | -0.0022(4)      | -0.0037(4)      |
| C2   | 0.0185(5)       | 0.0263(6)       | 0.0203(6)       | -0.0042(5)      | -0.0051(4)      | -0.0037(4)      |
| C3   | 0.0181(5)       | 0.0343(7)       | 0.0244(6)       | -0.0077(5)      | -0.0004(4)      | -0.0015(5)      |
| C4   | 0.0268(6)       | 0.0263(6)       | 0.0187(5)       | -0.0061(5)      | -0.0008(4)      | -0.0038(5)      |
| C5   | 0.0232(6)       | 0.0278(6)       | 0.0224(6)       | -0.0057(5)      | -0.0068(4)      | -0.0070(5)      |
| C6   | 0.0163(5)       | 0.0261(6)       | 0.0253(6)       | -0.0059(5)      | -0.0023(4)      | -0.0037(4)      |
| C7   | 0.0184(5)       | 0.0202(6)       | 0.0213(6)       | -0.0044(4)      | -0.0023(4)      | -0.0029(4)      |
| C8   | 0.0214(5)       | 0.0171(5)       | 0.0146(5)       | -0.0049(4)      | 0.0018(4)       | -0.0015(4)      |
| C9   | 0.0229(6)       | 0.0175(5)       | 0.0170(5)       | -0.0046(4)      | 0.0006(4)       | -0.0024(4)      |
| C10  | 0.0289(6)       | 0.0215(6)       | 0.0213(6)       | -0.0031(5)      | -0.0051(5)      | -0.0051(5)      |
| N1   | 0.0242(5)       | 0.0151(4)       | 0.0178(5)       | -0.0024(4)      | -0.0039(4)      | -0.0029(4)      |
| N2   | 0.0244(5)       | 0.0146(4)       | 0.0184(5)       | -0.0048(4)      | -0.0028(4)      | -0.0046(4)      |
| O1   | 0.0321(4)       | 0.0151(4)       | 0.0216(4)       | -0.0023(3)      | -0.0065(3)      | -0.0024(3)      |
| O2   | 0.0345(5)       | 0.0163(4)       | 0.0257(4)       | -0.0023(3)      | -0.0089(3)      | -0.0050(3)      |
| C1'  | 0.0134(5)       | 0.0212(6)       | 0.0219(6)       | -0.0030(4)      | -0.0033(4)      | -0.0035(4)      |
| C2'  | 0.0283(6)       | 0.0227(6)       | 0.0274(6)       | -0.0052(5)      | 0.0016(5)       | -0.0035(5)      |
| C3'  | 0.0301(7)       | 0.0396(7)       | 0.0263(6)       | -0.0113(6)      | 0.0034(5)       | -0.0041(5)      |
| C4'  | 0.0189(6)       | 0.0446(8)       | 0.0202(6)       | 0.0015(5)       | -0.0027(4)      | -0.0088(5)      |
| C5'  | 0.0208(6)       | 0.0268(6)       | 0.0294(6)       | 0.0063(5)       | -0.0091(5)      | -0.0083(5)      |
| C6'  | 0.0188(5)       | 0.0209(6)       | 0.0269(6)       | -0.0034(5)      | -0.0064(4)      | -0.0041(4)      |
| C7'  | 0.0192(5)       | 0.0183(5)       | 0.0223(6)       | -0.0045(4)      | -0.0005(4)      | -0.0052(4)      |
| C8'  | 0.0213(5)       | 0.0176(5)       | 0.0172(5)       | -0.0032(4)      | 0.0022(4)       | -0.0048(4)      |
| C9'  | 0.0239(6)       | 0.0174(5)       | 0.0173(5)       | -0.0020(4)      | 0.0017(4)       | -0.0049(4)      |
| C10' | 0.0305(6)       | 0.0222(6)       | 0.0225(6)       | -0.0047(5)      | -0.0056(5)      | -0.0024(5)      |
| N1'  | 0.0227(5)       | 0.0139(4)       | 0.0198(5)       | -0.0032(4)      | -0.0023(4)      | -0.0032(4)      |
| N2'  | 0.0268(5)       | 0.0151(5)       | 0.0194(5)       | -0.0056(4)      | -0.0031(4)      | -0.0042(4)      |
| O1'  | 0.0274(4)       | 0.0159(4)       | 0.0273(4)       | -0.0057(3)      | -0.0059(3)      | -0.0009(3)      |
| O2'  | 0.0309(4)       | 0.0152(4)       | 0.0248(4)       | -0.0041(3)      | -0.0044(3)      | -0.0037(3)      |

The form of the anisotropic displacement parameter is:  
 $\exp[-2\pi(a^2U_{11}h^2+b^2U_{22}k^2+c^2U_{33}l^2+2b^*c^*U_{23}kl+2a^*c^*U_{13}hl+2a^*b^*U_{12}hk)]$

**Table 5. Bond Distances in Compound 1356, Å**

|          |            |         |            |         |            |
|----------|------------|---------|------------|---------|------------|
| C1-C2    | 1.3854(16) | C1-C6   | 1.3903(15) | C1-C7   | 1.5126(15) |
| C2-C3    | 1.3881(16) | C3-C4   | 1.3846(16) | C4-C5   | 1.3835(17) |
| C5-C6    | 1.3812(17) | C7-N1   | 1.4523(13) | C8-O1   | 1.2356(13) |
| C8-N1    | 1.3267(14) | C8-N2   | 1.4028(14) | C9-O2   | 1.2242(14) |
| C9-N2    | 1.3653(14) | C9-C10  | 1.5021(15) | C1'-C2' | 1.3882(17) |
| C1'-C6'  | 1.3904(16) | C1'-C7' | 1.5114(15) | C2'-C3' | 1.3866(17) |
| C3'-C4'  | 1.3804(19) | C4'-C5' | 1.3837(19) | C5'-C6' | 1.3874(17) |
| C7'-N1'  | 1.4635(14) | C8'-O1' | 1.2357(13) | C8'-N1' | 1.3303(14) |
| C8'-N2'  | 1.4019(14) | C9'-O2' | 1.2219(14) | C9'-N2' | 1.3717(15) |
| C9'-C10' | 1.5033(15) |         |            |         |            |

**Table 6. Bond Angles in Compound 1356, °**

|              |            |              |            |             |            |
|--------------|------------|--------------|------------|-------------|------------|
| C2-C1-C6     | 118.68(10) | C2-C1-C7     | 123.13(10) | C6-C1-C7    | 118.18(10) |
| C1-C2-C3     | 120.49(10) | C4-C3-C2     | 120.31(11) | C5-C4-C3    | 119.49(11) |
| C6-C5-C4     | 120.06(10) | C5-C6-C1     | 120.97(10) | N1-C7-C1    | 114.56(9)  |
| O1-C8-N1     | 124.72(10) | O1-C8-N2     | 118.05(9)  | N1-C8-N2    | 117.22(9)  |
| O2-C9-N2     | 123.58(10) | O2-C9-C10    | 122.52(10) | N2-C9-C10   | 113.89(9)  |
| C8-N1-C7     | 121.98(9)  | C9-N2-C8     | 129.14(9)  | C2'-C1'-C6' | 118.67(11) |
| C2'-C1'-C7'  | 120.14(10) | C6'-C1'-C7'  | 121.19(10) | C3'-C2'-C1' | 120.79(11) |
| C4'-C3'-C2'  | 120.18(12) | C3'-C4'-C5'  | 119.56(11) | C4'-C5'-C6' | 120.33(11) |
| C5'-C6'-C1'  | 120.47(11) | N1'-C7'-C1'  | 113.44(9)  | O1'-C8'-N1' | 123.36(10) |
| O1'-C8'-N2'  | 118.38(9)  | N1'-C8'-N2'  | 118.25(10) | O2'-C9'-N2' | 122.62(10) |
| O2'-C9'-C10' | 122.83(10) | N2'-C9'-C10' | 114.55(9)  | C8'-N1'-C7' | 120.68(9)  |
| C9'-N2'-C8'  | 128.54(9)  |              |            |             |            |

---

<sup>i</sup>Bruker (2009) SAINT. Bruker AXS Inc., Madison, Wisconsin, USA.

<sup>ii</sup>Bruker (2009) SHELXTL. Bruker AXS Inc., Madison, Wisconsin, USA.

<sup>iii</sup>Sheldrick, G.M. (2007) SADABS. University of Gottingen, Germany.

<sup>iv</sup>Sheldrick, G.M. (2008) Acta Cryst. A64,112-122.

<sup>v</sup>Sheldrick, G.M. (2008) Acta Cryst. A64,112-122.

<sup>vi</sup> $R1 = \sum |F_o| - |F_c| / \sum |F_o|$

$wR2 = [\sum w(F_o^2 - F_c^2)^2 / \sum w(F_o^2)]^{1/2}$

$GOF = [\sum w(F_o^2 - F_c^2)^2 / (n - p)]^{1/2}$

where n = the number of reflections and p = the number of parameters refined.

<sup>vii</sup>“ORTEP-II: A Fortran Thermal Ellipsoid Plot Program for Crystal Structure Illustrations”. C.K. Johnson (1976) ORNL-5138.

### X-ray Structure Determination of Compound 1352 (i.e., compound 16; CCDC 1428195)

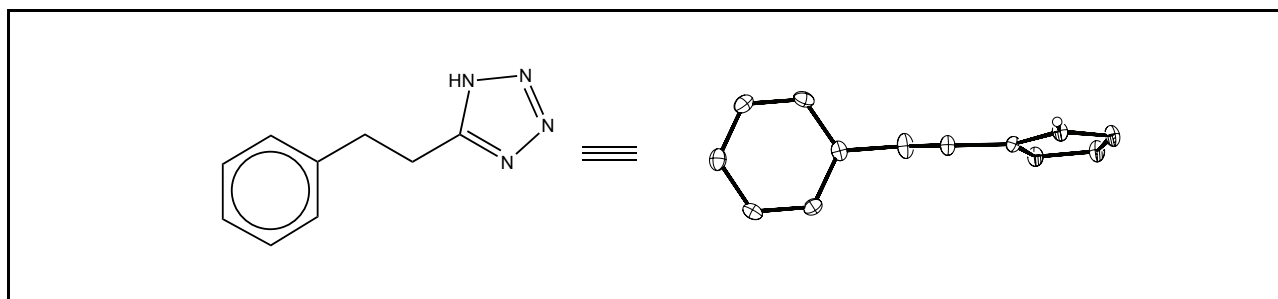

Compound 1352,  $C_9H_{10}N_4$ , crystallizes in the triclinic space group  $P\bar{1}$  with  $a=9.7468(5)\text{\AA}$ ,  $b=16.6468(8)\text{\AA}$ ,  $c=22.8910(10)\text{\AA}$ ,  $\alpha=91.652(2)^\circ$ ,  $\beta=90.027(2)^\circ$ ,  $\gamma=103.810(2)^\circ$ ,  $V=3605.2(3)\text{\AA}^3$ ,  $Z=16$ , and  $d_{\text{calc}}=1.284\text{ g/cm}^3$ . X-ray intensity data were collected on a Bruker APEXII CCD area detector employing graphite-monochromated Mo- $K\alpha$  radiation ( $\lambda=0.71073\text{ \AA}$ ) at a temperature of 100(1)K. Preliminary indexing was performed from a series of thirty-six  $0.5^\circ$  rotation frames with exposures of 10 seconds. A total of 3624 frames were collected with a crystal to detector distance of 37.6 mm, rotation widths of  $0.5^\circ$  and exposures of 20 seconds:

| scan type | $2\theta$ | $\omega$ | $\phi$ | $\chi$ | frames |
|-----------|-----------|----------|--------|--------|--------|
| $\phi$    | -15.50    | 258.48   | 16.03  | 19.46  | 721    |
| $\phi$    | -5.50     | 86.60    | 310.32 | -30.00 | 92     |
| $\omega$  | 12.00     | 322.28   | 290.21 | 72.15  | 85     |
| $\omega$  | -5.50     | 350.73   | 18.26  | -42.87 | 210    |
| $\phi$    | -23.00    | 334.21   | 67.29  | 73.66  | 669    |
| $\phi$    | 19.50     | 59.55    | 9.15   | -26.26 | 681    |
| $\phi$    | -23.00    | 315.83   | 18.32  | 28.88  | 684    |
| $\omega$  | -10.50    | 307.73   | 272.07 | 99.72  | 67     |
| $\phi$    | -23.00    | 316.70   | 113.43 | 98.89  | 415    |

The crystal grew as a non-merohedral twin; the program CELL\_NOW<sup>i</sup> was used to index the diffraction images and to determine the twinning mechanism. The crystal was twinned by a rotation of  $180^\circ$  about the 001 real direction. Rotation frames were integrated using SAINT<sup>ii</sup>, producing a listing of unaveraged  $F^2$  and  $\sigma(F^2)$  values which were then passed to the SHELXTL<sup>iii</sup> program package for further processing and structure solution. A total of 152538 reflections were measured over the ranges  $1.52 \leq \theta \leq 25.40^\circ$ ,  $-11 \leq h \leq 11$ ,  $-20 \leq k \leq 20$ ,  $0 \leq l \leq 27$  yielding 13079 unique reflections ( $R_{\text{int}} = 0.0477$ ). The intensity data were corrected for Lorentz and polarization effects and for absorption using TWINABS<sup>iv</sup>



(minimum and maximum transmission 0.6307, 0.7452).

The structure was solved by direct methods (SHELXS-97<sup>v</sup>). The asymmetric unit consists of eight molecules of the title compound. Refinement was by full-matrix least squares based on  $F^2$  using SHELXL-97.<sup>vi</sup> All reflections were used during refinement. The weighting scheme used was  $w=1/[\sigma^2(F_o^2) + (0.0500P)^2 + 2.0654P]$  where  $P = (F_o^2 + 2F_c^2)/3$ . Non-hydrogen atoms were refined anisotropically and hydrogen atoms were refined using a riding model. Refinement converged to  $R1=0.0466$  and  $wR2=0.1251$  for 11471 observed reflections for which  $F > 4\sigma(F)$  and  $R1=0.0565$  and  $wR2=0.1332$  and  $GOF = 1.165$  for all 13079 unique, non-zero reflections and 939 variables.<sup>vii</sup> The maximum  $\Delta/\sigma$  in the final cycle of least squares was 0.001 and the two most prominent peaks in the final difference Fourier were +0.247 and -0.245  $e/\text{\AA}^3$ . The twinning parameter refined to a value of 0.490(1).

Table 1. lists cell information, data collection parameters, and refinement data. Final positional and equivalent isotropic thermal parameters are given in Tables 2. and 3. Anisotropic thermal parameters are in Table 4. Tables 5. and 6. list bond distances and bond angles. Figure 2. is an ORTEP<sup>viii</sup> representation of the eight molecules in the asymmetric unit with 30% probability thermal ellipsoids displayed (the numbering scheme is as shown below)

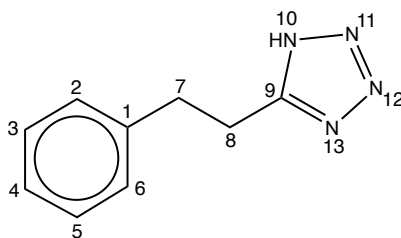

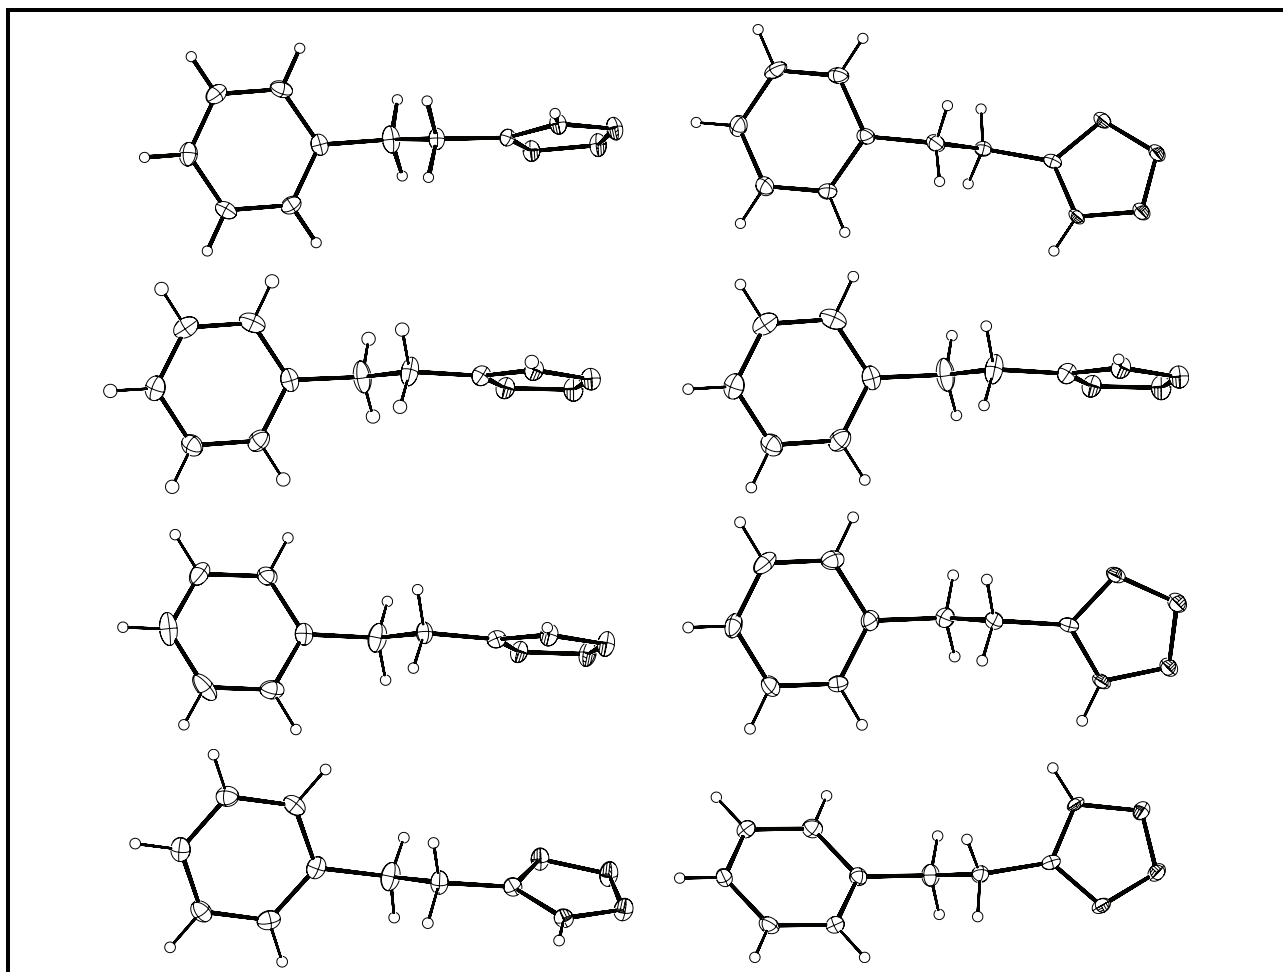

Figure 2. ORTEP drawings of the eight molecules in the asymmetric unit with 30% probability thermal ellipsoids.

**Table 1. Summary of Structure Determination of Compound 1352**

|                                   |                                               |
|-----------------------------------|-----------------------------------------------|
| Empirical formula                 | C <sub>9</sub> H <sub>10</sub> N <sub>4</sub> |
| Formula weight                    | 174.21                                        |
| Temperature                       | 100(1) K                                      |
| Wavelength                        | 0.71073 Å                                     |
| Crystal system                    | triclinic                                     |
| Space group                       | P $\bar{1}$                                   |
| Cell constants:                   |                                               |
| a                                 | 9.7468(5) Å                                   |
| b                                 | 16.6468(8) Å                                  |
| c                                 | 22.8910(10) Å                                 |
| $\alpha$                          | 91.652(2)°                                    |
| $\beta$                           | 90.027(2)°                                    |
| $\gamma$                          | 103.810(2)°                                   |
| Volume                            | 3605.2(3) Å <sup>3</sup>                      |
| Z                                 | 16                                            |
| Density (calculated)              | 1.284 Mg/m <sup>3</sup>                       |
| Absorption coefficient            | 0.083 mm <sup>-1</sup>                        |
| F(000)                            | 1472                                          |
| Crystal size                      | 0.32 x 0.22 x 0.06 mm <sup>3</sup>            |
| Theta range for data collection   | 1.52 to 25.40°                                |
| Index ranges                      | -11 ≤ h ≤ 11, -20 ≤ k ≤ 20, 0 ≤ l ≤ 27        |
| Reflections collected             | 152538                                        |
| Independent reflections           | 13079 [R(int) = 0.0477]                       |
| Completeness to theta = 25.40°    | 98.5 %                                        |
| Absorption correction             | Semi-empirical from equivalents               |
| Max. and min. transmission        | 0.7452 and 0.6307                             |
| Refinement method                 | Full-matrix least-squares on F <sup>2</sup>   |
| Data / restraints / parameters    | 13079 / 0 / 939                               |
| Goodness-of-fit on F <sup>2</sup> | 1.165                                         |
| Final R indices [I > 2σ(I)]       | R1 = 0.0466, wR2 = 0.1251                     |
| R indices (all data)              | R1 = 0.0565, wR2 = 0.1332                     |
| Largest diff. peak and hole       | 0.247 and -0.245 e.Å <sup>-3</sup>            |

**Table 2. Refined Positional Parameters for Compound 1352**

| Atom           | x         | y           | z           | $U_{eq}, \text{Å}^2$ |
|----------------|-----------|-------------|-------------|----------------------|
| Molecule No. 1 |           |             |             |                      |
| C1             | 0.4740(3) | 0.89734(17) | 0.21991(11) | 0.0221(6)            |
| C2             | 0.4851(3) | 0.83397(18) | 0.18063(13) | 0.0278(6)            |
| C3             | 0.5150(3) | 0.85010(18) | 0.12257(12) | 0.0291(6)            |
| C4             | 0.5339(3) | 0.92903(19) | 0.10275(12) | 0.0294(6)            |
| C5             | 0.5227(3) | 0.99292(18) | 0.14153(12) | 0.0273(6)            |
| C6             | 0.4936(3) | 0.97683(17) | 0.19961(12) | 0.0246(6)            |
| C7             | 0.4434(3) | 0.8802(2)   | 0.28359(12) | 0.0315(7)            |
| C8             | 0.5768(3) | 0.89416(18) | 0.32053(11) | 0.0215(6)            |
| C9             | 0.5471(3) | 0.88207(16) | 0.38394(11) | 0.0180(5)            |
| N10            | 0.6385(2) | 0.87353(14) | 0.42517(9)  | 0.0206(5)            |
| N11            | 0.5751(2) | 0.86550(16) | 0.47743(9)  | 0.0256(5)            |
| N12            | 0.4460(2) | 0.86914(15) | 0.46771(9)  | 0.0255(5)            |
| N13            | 0.4252(2) | 0.87945(14) | 0.40978(9)  | 0.0223(5)            |
| Molecule No. 2 |           |             |             |                      |
| C1             | 1.2005(3) | 0.91309(17) | 0.59873(11) | 0.0221(6)            |
| C2             | 1.3205(3) | 0.88377(18) | 0.61026(12) | 0.0266(6)            |
| C3             | 1.3495(3) | 0.8618(2)   | 0.66582(12) | 0.0318(7)            |
| C4             | 1.2603(3) | 0.86905(19) | 0.71142(12) | 0.0295(7)            |
| C5             | 1.1404(3) | 0.89887(18) | 0.70082(12) | 0.0293(7)            |
| C6             | 1.1112(3) | 0.92016(17) | 0.64533(12) | 0.0258(6)            |
| C7             | 1.1658(3) | 0.93197(17) | 0.53710(12) | 0.0249(6)            |
| C8             | 1.0759(3) | 0.85422(17) | 0.50571(11) | 0.0205(6)            |
| C9             | 1.0465(3) | 0.86515(16) | 0.44292(11) | 0.0186(5)            |
| N10            | 1.1387(2) | 0.87168(14) | 0.39962(9)  | 0.0204(5)            |
| N11            | 1.0761(2) | 0.87852(15) | 0.34853(10) | 0.0253(5)            |
| N12            | 0.9456(2) | 0.87627(15) | 0.36055(9)  | 0.0255(5)            |
| N13            | 0.9238(2) | 0.86817(14) | 0.41927(9)  | 0.0233(5)            |
| Molecule No. 3 |           |             |             |                      |
| C1             | 0.7376(3) | 0.65312(18) | 0.23743(11) | 0.0249(6)            |
| C2             | 0.7467(3) | 0.58326(19) | 0.20430(14) | 0.0315(7)            |
| C3             | 0.7751(3) | 0.58907(19) | 0.14535(14) | 0.0324(7)            |
| C4             | 0.7934(3) | 0.66330(19) | 0.11805(13) | 0.0306(7)            |
| C5             | 0.7853(3) | 0.73317(19) | 0.15066(12) | 0.0309(7)            |
| C6             | 0.7583(3) | 0.72759(19) | 0.20975(12) | 0.0314(7)            |
| C7             | 0.7059(3) | 0.6491(2)   | 0.30193(12) | 0.0398(8)            |
| C8             | 0.8334(3) | 0.6573(2)   | 0.33968(12) | 0.0341(7)            |
| C9             | 0.8062(3) | 0.66253(17) | 0.40313(11) | 0.0228(6)            |
| N10            | 0.9004(2) | 0.66713(14) | 0.44648(9)  | 0.0225(5)            |
| N11            | 0.8391(2) | 0.67423(15) | 0.49802(10) | 0.0253(5)            |
| N12            | 0.7089(2) | 0.67333(16) | 0.48675(10) | 0.0268(5)            |
| N13            | 0.6846(2) | 0.66645(15) | 0.42786(10) | 0.0246(5)            |
| Molecule No. 4 |           |             |             |                      |
| C1             | 0.4237(3) | 0.57702(17) | 0.60061(11) | 0.0226(6)            |
| C2             | 0.3613(3) | 0.60578(18) | 0.64907(11) | 0.0260(6)            |
| C3             | 0.4155(3) | 0.60383(19) | 0.70486(11) | 0.0273(6)            |
| C4             | 0.5338(3) | 0.57308(18) | 0.71322(12) | 0.0272(6)            |
| C5             | 0.5976(3) | 0.54483(18) | 0.66579(12) | 0.0275(6)            |
| C6             | 0.5430(3) | 0.54714(17) | 0.60983(12) | 0.0252(6)            |
| C7             | 0.3655(3) | 0.57974(17) | 0.53954(11) | 0.0265(6)            |
| C8             | 0.3547(3) | 0.66675(17) | 0.52358(11) | 0.0224(6)            |
| C9             | 0.3171(3) | 0.67193(16) | 0.46096(11) | 0.0195(5)            |
| N10            | 0.4045(2) | 0.67201(14) | 0.41591(9)  | 0.0213(5)            |
| N11            | 0.3393(2) | 0.67893(15) | 0.36542(9)  | 0.0240(5)            |
| N12            | 0.2125(2) | 0.68267(15) | 0.37939(10) | 0.0254(5)            |
| N13            | 0.1943(2) | 0.67847(14) | 0.43841(9)  | 0.0224(5)            |

| Molecule No. 5 |            |             |              |           |
|----------------|------------|-------------|--------------|-----------|
| C1             | -0.0215(3) | 0.40451(17) | 0.27429(11)  | 0.0228(6) |
| C2             | 0.0052(3)  | 0.47838(17) | 0.30578(12)  | 0.0274(6) |
| C3             | 0.0244(3)  | 0.4804(2)   | 0.36575(13)  | 0.0337(7) |
| C4             | 0.0196(3)  | 0.4096(2)   | 0.39472(13)  | 0.0399(8) |
| C5             | -0.0047(4) | 0.3353(2)   | 0.36389(14)  | 0.0406(8) |
| C6             | -0.0262(3) | 0.33294(18) | 0.30411(14)  | 0.0318(7) |
| C7             | -0.0463(3) | 0.4011(2)   | 0.20912(12)  | 0.0339(7) |
| C8             | 0.0821(3)  | 0.39059(18) | 0.17435(11)  | 0.0229(6) |
| C9             | 0.0535(3)  | 0.38387(16) | 0.11010(11)  | 0.0183(5) |
| N10            | 0.1453(2)  | 0.37676(14) | 0.06871(9)   | 0.0226(5) |
| N11            | 0.0810(2)  | 0.37156(16) | 0.01603(9)   | 0.0271(5) |
| N12            | -0.0478(2) | 0.37478(16) | 0.02595(10)  | 0.0274(5) |
| N13            | -0.0692(2) | 0.38190(14) | 0.08459(9)   | 0.0229(5) |
| Molecule No. 6 |            |             |              |           |
| C1             | 0.7020(3)  | 0.40702(17) | -0.10524(12) | 0.0254(6) |
| C2             | 0.6160(3)  | 0.41506(18) | -0.15223(12) | 0.0283(6) |
| C3             | 0.6481(3)  | 0.39301(19) | -0.20852(12) | 0.0312(7) |
| C4             | 0.7643(3)  | 0.3615(2)   | -0.21905(12) | 0.0326(7) |
| C5             | 0.8500(3)  | 0.3528(2)   | -0.17267(12) | 0.0371(8) |
| C6             | 0.8199(3)  | 0.3757(2)   | -0.11648(12) | 0.0328(7) |
| C7             | 0.6652(3)  | 0.42864(18) | -0.04322(11) | 0.0257(6) |
| C8             | 0.5799(3)  | 0.35162(17) | -0.01311(11) | 0.0220(6) |
| C9             | 0.5518(3)  | 0.36658(16) | 0.05013(11)  | 0.0191(5) |
| N10            | 0.6449(2)  | 0.37389(13) | 0.09374(9)   | 0.0201(5) |
| N11            | 0.5832(2)  | 0.38472(14) | 0.14492(9)   | 0.0231(5) |
| N12            | 0.4530(2)  | 0.38374(14) | 0.13240(10)  | 0.0251(5) |
| N13            | 0.4302(2)  | 0.37243(14) | 0.07370(9)   | 0.0218(5) |
| Molecule No. 7 |            |             |              |           |
| C1             | 0.2433(3)  | 0.14545(18) | 0.27053(12)  | 0.0237(6) |
| C2             | 0.2551(3)  | 0.22196(18) | 0.29920(12)  | 0.0274(6) |
| C3             | 0.2786(3)  | 0.23129(18) | 0.35858(13)  | 0.0292(6) |
| C4             | 0.2908(3)  | 0.16412(19) | 0.39071(12)  | 0.0283(6) |
| C5             | 0.2791(3)  | 0.08801(19) | 0.36294(12)  | 0.0282(6) |
| C6             | 0.2544(3)  | 0.07870(18) | 0.30322(12)  | 0.0268(6) |
| C7             | 0.2188(3)  | 0.1370(2)   | 0.20500(12)  | 0.0326(7) |
| C8             | 0.3485(3)  | 0.17703(19) | 0.17073(11)  | 0.0255(6) |
| C9             | 0.3223(3)  | 0.17343(17) | 0.10654(11)  | 0.0206(5) |
| N10            | 0.4170(2)  | 0.17190(14) | 0.06454(9)   | 0.0217(5) |
| N11            | 0.3561(2)  | 0.17146(16) | 0.01176(10)  | 0.0266(5) |
| N12            | 0.2256(2)  | 0.17182(16) | 0.02163(10)  | 0.0290(6) |
| N13            | 0.2012(2)  | 0.17304(15) | 0.08037(10)  | 0.0250(5) |
| Molecule No. 8 |            |             |              |           |
| C1             | 0.9263(3)  | 0.07639(16) | -0.09633(11) | 0.0220(6) |
| C2             | 1.0448(3)  | 0.04445(17) | -0.10804(12) | 0.0253(6) |
| C3             | 1.0945(3)  | 0.04133(17) | -0.16459(12) | 0.0254(6) |
| C4             | 1.0284(3)  | 0.06981(17) | -0.21045(11) | 0.0240(6) |
| C5             | 0.9118(3)  | 0.10211(18) | -0.19945(12) | 0.0263(6) |
| C6             | 0.8611(3)  | 0.10451(17) | -0.14302(12) | 0.0243(6) |
| C7             | 0.8731(3)  | 0.08028(18) | -0.03454(11) | 0.0266(6) |
| C8             | 0.8609(3)  | 0.16724(17) | -0.01579(11) | 0.0225(6) |
| C9             | 0.8299(3)  | 0.17565(16) | 0.04760(11)  | 0.0199(5) |
| N10            | 0.9215(2)  | 0.17726(14) | 0.09115(9)   | 0.0205(5) |
| N11            | 0.8601(2)  | 0.18719(15) | 0.14255(9)   | 0.0246(5) |
| N12            | 0.7320(2)  | 0.19118(14) | 0.13040(10)  | 0.0236(5) |
| N13            | 0.7100(2)  | 0.18388(14) | 0.07165(9)   | 0.0218(5) |

$$U_{eq} = \frac{1}{3}[U_{11}(aa^*)^2 + U_{22}(bb^*)^2 + U_{33}(cc^*)^2 + 2U_{12}aa^*bb^*\cos\gamma + 2U_{13}aa^*cc^*\cos\beta + 2U_{23}bb^*cc^*\cos\alpha]$$

**Table 3. Positional Parameters for Hydrogens in Compound 1352**

| Atom           | x       | y      | z      | $U_{iso}, \text{Å}^2$ |
|----------------|---------|--------|--------|-----------------------|
| Molecule No. 1 |         |        |        |                       |
| H2             | 0.4723  | 0.7802 | 0.1936 | 0.037                 |
| H3             | 0.5224  | 0.8072 | 0.0967 | 0.039                 |
| H4             | 0.5540  | 0.9397 | 0.0636 | 0.039                 |
| H5             | 0.5348  | 1.0465 | 0.1283 | 0.036                 |
| H6             | 0.4871  | 1.0199 | 0.2254 | 0.033                 |
| H7a            | 0.3902  | 0.8233 | 0.2871 | 0.042                 |
| H7b            | 0.3851  | 0.9159 | 0.2985 | 0.042                 |
| H8a            | 0.6323  | 0.8562 | 0.3070 | 0.029                 |
| H8b            | 0.6326  | 0.9500 | 0.3152 | 0.029                 |
| H10            | 0.7254  | 0.8732 | 0.4192 | 0.027                 |
| Molecule No. 2 |         |        |        |                       |
| H2             | 1.3819  | 0.8790 | 0.5800 | 0.035                 |
| H3             | 1.4294  | 0.8420 | 0.6725 | 0.042                 |
| H4             | 1.2798  | 0.8543 | 0.7488 | 0.039                 |
| H5             | 1.0802  | 0.9043 | 0.7314 | 0.039                 |
| H6             | 1.0307  | 0.9396 | 0.6388 | 0.034                 |
| H7a            | 1.2526  | 0.9518 | 0.5157 | 0.033                 |
| H7b            | 1.1145  | 0.9753 | 0.5380 | 0.033                 |
| H8a            | 1.1241  | 0.8098 | 0.5085 | 0.027                 |
| H8b            | 0.9866  | 0.8374 | 0.5259 | 0.027                 |
| H10            | 1.2263  | 0.8715 | 0.4038 | 0.027                 |
| Molecule No. 3 |         |        |        |                       |
| H2             | 0.7336  | 0.5324 | 0.2220 | 0.042                 |
| H3             | 0.7819  | 0.5420 | 0.1237 | 0.043                 |
| H4             | 0.8111  | 0.6665 | 0.0782 | 0.041                 |
| H5             | 0.7980  | 0.7839 | 0.1328 | 0.041                 |
| H6             | 0.7540  | 0.7750 | 0.2314 | 0.042                 |
| H7a            | 0.6599  | 0.6930 | 0.3127 | 0.053                 |
| H7b            | 0.6402  | 0.5968 | 0.3094 | 0.053                 |
| H8a            | 0.8734  | 0.6100 | 0.3318 | 0.045                 |
| H8b            | 0.9034  | 0.7065 | 0.3290 | 0.045                 |
| H10            | 0.9873  | 0.6657 | 0.4419 | 0.030                 |
| Molecule No. 4 |         |        |        |                       |
| H2             | 0.2819  | 0.6267 | 0.6439 | 0.035                 |
| H3             | 0.3722  | 0.6232 | 0.7367 | 0.036                 |
| H4             | 0.5701  | 0.5715 | 0.7507 | 0.036                 |
| H5             | 0.6772  | 0.5242 | 0.6712 | 0.037                 |
| H6             | 0.5872  | 0.5283 | 0.5781 | 0.034                 |
| H7a            | 0.2724  | 0.5424 | 0.5366 | 0.035                 |
| H7b            | 0.4261  | 0.5604 | 0.5116 | 0.035                 |
| H8a            | 0.2836  | 0.6829 | 0.5478 | 0.030                 |
| H8b            | 0.4444  | 0.7055 | 0.5319 | 0.030                 |
| H10            | 0.4906  | 0.6681 | 0.4189 | 0.028                 |
| Molecule No. 5 |         |        |        |                       |
| H2             | 0.0104  | 0.5275 | 0.2865 | 0.036                 |
| H3             | 0.0407  | 0.5307 | 0.3865 | 0.045                 |
| H4             | 0.0327  | 0.4114 | 0.4350 | 0.053                 |
| H5             | -0.0067 | 0.2867 | 0.3833 | 0.054                 |
| H6             | -0.0441 | 0.2824 | 0.2837 | 0.042                 |
| H7a            | -0.0707 | 0.4517 | 0.1978 | 0.045                 |
| H7b            | -0.1259 | 0.3553 | 0.1993 | 0.045                 |
| H8a            | 0.1607  | 0.4376 | 0.1827 | 0.030                 |
| H8b            | 0.1089  | 0.3412 | 0.1866 | 0.030                 |
| H10            | 0.2320  | 0.3756 | 0.0745 | 0.030                 |

| Molecule No. 6 |        |        |         |       |
|----------------|--------|--------|---------|-------|
| H2             | 0.5362 | 0.4354 | -0.1458 | 0.038 |
| H3             | 0.5904 | 0.3996 | -0.2395 | 0.042 |
| H4             | 0.7850 | 0.3464 | -0.2568 | 0.043 |
| H5             | 0.9285 | 0.3314 | -0.1793 | 0.049 |
| H6             | 0.8791 | 0.3700 | -0.0858 | 0.044 |
| H7a            | 0.6105 | 0.4702 | -0.0440 | 0.034 |
| H7b            | 0.7514 | 0.4516 | -0.0212 | 0.034 |
| H8a            | 0.4904 | 0.3320 | -0.0335 | 0.029 |
| H8b            | 0.6310 | 0.3083 | -0.0163 | 0.029 |
| H10            | 0.7318 | 0.3720 | 0.0897  | 0.027 |
| Molecule No. 7 |        |        |         |       |
| H2             | 0.2468 | 0.2673 | 0.2779  | 0.037 |
| H3             | 0.2864 | 0.2827 | 0.3771  | 0.039 |
| H4             | 0.3067 | 0.1702 | 0.4308  | 0.038 |
| H5             | 0.2880 | 0.0429 | 0.3844  | 0.037 |
| H6             | 0.2451 | 0.0270 | 0.2850  | 0.036 |
| H7a            | 0.1902 | 0.0787 | 0.1938  | 0.043 |
| H7b            | 0.1422 | 0.1621 | 0.1950  | 0.043 |
| H8a            | 0.3807 | 0.2345 | 0.1837  | 0.034 |
| H8b            | 0.4233 | 0.1495 | 0.1789  | 0.034 |
| H10            | 0.5039 | 0.1713 | 0.0704  | 0.029 |
| Molecule No. 8 |        |        |         |       |
| H2             | 1.0903 | 0.0252 | -0.0776 | 0.034 |
| H3             | 1.1730 | 0.0199 | -0.1718 | 0.034 |
| H4             | 1.0617 | 0.0673 | -0.2483 | 0.032 |
| H5             | 0.8677 | 0.1221 | -0.2300 | 0.035 |
| H6             | 0.7820 | 0.1254 | -0.1362 | 0.032 |
| H7a            | 0.9370 | 0.0626 | -0.0080 | 0.035 |
| H7b            | 0.7811 | 0.0422 | -0.0316 | 0.035 |
| H8a            | 0.9487 | 0.2065 | -0.0246 | 0.030 |
| H8b            | 0.7863 | 0.1814 | -0.0385 | 0.030 |
| H10            | 1.0070 | 0.1726 | 0.0870  | 0.027 |

**Table 4. Refined Thermal Parameters (U's) for Compound 1352**

| Atom           | $U_{11}$   | $U_{22}$   | $U_{33}$   | $U_{23}$    | $U_{13}$    | $U_{12}$    |
|----------------|------------|------------|------------|-------------|-------------|-------------|
| Molecule No. 1 |            |            |            |             |             |             |
| C1             | 0.0115(12) | 0.0316(15) | 0.0224(13) | 0.0048(11)  | -0.0003(10) | 0.0031(11)  |
| C2             | 0.0257(15) | 0.0222(14) | 0.0377(16) | 0.0043(12)  | -0.0040(12) | 0.0096(12)  |
| C3             | 0.0275(15) | 0.0307(15) | 0.0301(15) | -0.0080(12) | -0.0020(12) | 0.0099(12)  |
| C4             | 0.0235(14) | 0.0424(17) | 0.0230(14) | 0.0010(12)  | 0.0029(11)  | 0.0094(12)  |
| C5             | 0.0271(15) | 0.0216(14) | 0.0338(15) | 0.0083(12)  | 0.0024(12)  | 0.0061(11)  |
| C6             | 0.0216(14) | 0.0246(15) | 0.0275(14) | -0.0046(11) | 0.0014(11)  | 0.0059(11)  |
| C7             | 0.0177(14) | 0.0521(19) | 0.0236(14) | 0.0068(13)  | -0.0008(11) | 0.0053(13)  |
| C8             | 0.0124(13) | 0.0343(16) | 0.0182(13) | 0.0022(11)  | 0.0001(10)  | 0.0062(11)  |
| C9             | 0.0155(13) | 0.0208(13) | 0.0174(12) | -0.0005(10) | -0.0008(10) | 0.0042(10)  |
| N10            | 0.0106(11) | 0.0319(13) | 0.0205(11) | 0.0042(9)   | 0.0017(8)   | 0.0069(9)   |
| N11            | 0.0195(13) | 0.0392(14) | 0.0205(11) | 0.0067(10)  | 0.0016(9)   | 0.0106(10)  |
| N12            | 0.0179(12) | 0.0406(14) | 0.0200(11) | 0.0035(10)  | 0.0025(9)   | 0.0104(10)  |
| N13            | 0.0150(11) | 0.0338(13) | 0.0200(11) | 0.0025(9)   | 0.0031(9)   | 0.0094(9)   |
| Molecule No. 2 |            |            |            |             |             |             |
| C1             | 0.0147(13) | 0.0245(14) | 0.0258(14) | -0.0048(11) | -0.0008(11) | 0.0026(11)  |
| C2             | 0.0172(14) | 0.0392(16) | 0.0234(14) | -0.0016(12) | 0.0032(11)  | 0.0069(12)  |
| C3             | 0.0198(15) | 0.0484(19) | 0.0261(15) | 0.0009(13)  | -0.0010(12) | 0.0062(13)  |
| C4             | 0.0230(15) | 0.0383(17) | 0.0225(14) | 0.0000(12)  | -0.0006(11) | -0.0021(12) |
| C5             | 0.0230(15) | 0.0330(16) | 0.0268(15) | -0.0089(12) | 0.0105(12)  | -0.0026(12) |
| C6             | 0.0174(14) | 0.0254(14) | 0.0332(15) | -0.0063(12) | 0.0014(11)  | 0.0035(11)  |
| C7             | 0.0200(14) | 0.0259(15) | 0.0295(14) | -0.0028(11) | -0.0031(11) | 0.0075(12)  |
| C8             | 0.0150(13) | 0.0259(14) | 0.0203(13) | 0.0003(10)  | 0.0020(10)  | 0.0040(11)  |
| C9             | 0.0131(13) | 0.0178(13) | 0.0252(13) | 0.0009(10)  | 0.0010(10)  | 0.0041(10)  |
| N10            | 0.0119(11) | 0.0293(13) | 0.0215(11) | 0.0041(9)   | -0.0016(9)  | 0.0077(9)   |
| N11            | 0.0198(12) | 0.0351(13) | 0.0238(12) | 0.0058(10)  | -0.0010(9)  | 0.0114(10)  |
| N12            | 0.0192(12) | 0.0383(14) | 0.0224(11) | 0.0072(10)  | -0.0014(9)  | 0.0127(10)  |
| N13            | 0.0161(11) | 0.0307(13) | 0.0248(12) | 0.0027(9)   | -0.0016(9)  | 0.0087(9)   |
| Molecule No. 3 |            |            |            |             |             |             |
| C1             | 0.0129(13) | 0.0367(16) | 0.0233(14) | 0.0043(12)  | -0.0021(10) | 0.0019(11)  |
| C2             | 0.0204(15) | 0.0285(16) | 0.0465(18) | 0.0113(13)  | 0.0011(13)  | 0.0064(12)  |
| C3             | 0.0222(15) | 0.0306(16) | 0.0417(17) | -0.0085(13) | 0.0049(13)  | 0.0023(12)  |
| C4             | 0.0206(14) | 0.0412(18) | 0.0275(15) | -0.0012(13) | 0.0079(12)  | 0.0027(13)  |
| C5             | 0.0293(16) | 0.0328(16) | 0.0304(15) | 0.0071(12)  | 0.0079(12)  | 0.0067(13)  |
| C6             | 0.0292(16) | 0.0317(16) | 0.0319(15) | -0.0055(13) | 0.0057(13)  | 0.0051(13)  |
| C7             | 0.0226(16) | 0.070(2)   | 0.0230(15) | 0.0078(14)  | -0.0015(12) | 0.0027(15)  |
| C8             | 0.0228(15) | 0.062(2)   | 0.0224(14) | -0.0084(14) | -0.0037(12) | 0.0217(14)  |
| C9             | 0.0155(13) | 0.0290(15) | 0.0254(14) | -0.0023(11) | -0.0035(11) | 0.0085(11)  |
| N10            | 0.0127(11) | 0.0314(13) | 0.0252(12) | -0.0027(9)  | -0.0008(9)  | 0.0092(9)   |
| N11            | 0.0169(12) | 0.0335(13) | 0.0260(12) | 0.0013(10)  | -0.0005(9)  | 0.0072(10)  |
| N12            | 0.0171(12) | 0.0398(14) | 0.0253(12) | 0.0006(10)  | 0.0007(9)   | 0.0103(10)  |
| N13            | 0.0180(12) | 0.0326(13) | 0.0243(12) | -0.0020(10) | 0.0007(9)   | 0.0087(10)  |
| Molecule No. 4 |            |            |            |             |             |             |
| C1             | 0.0213(14) | 0.0228(14) | 0.0222(13) | 0.0026(10)  | 0.0024(11)  | 0.0019(11)  |
| C2             | 0.0197(14) | 0.0333(16) | 0.0255(14) | 0.0037(12)  | 0.0028(11)  | 0.0069(12)  |
| C3             | 0.0226(15) | 0.0390(17) | 0.0199(13) | 0.0042(12)  | 0.0051(11)  | 0.0060(13)  |
| C4             | 0.0279(15) | 0.0285(15) | 0.0234(14) | 0.0050(11)  | -0.0026(11) | 0.0027(12)  |
| C5             | 0.0263(15) | 0.0277(15) | 0.0293(14) | 0.0064(12)  | -0.0018(12) | 0.0075(12)  |
| C6             | 0.0283(15) | 0.0261(15) | 0.0229(13) | 0.0013(11)  | 0.0054(11)  | 0.0097(12)  |
| C7             | 0.0303(16) | 0.0249(15) | 0.0225(14) | -0.0007(11) | -0.0036(11) | 0.0034(12)  |
| C8             | 0.0221(14) | 0.0279(15) | 0.0185(13) | 0.0015(10)  | 0.0017(10)  | 0.0082(11)  |
| C9             | 0.0144(13) | 0.0202(13) | 0.0239(13) | 0.0006(10)  | 0.0023(10)  | 0.0041(10)  |
| N10            | 0.0154(11) | 0.0324(13) | 0.0181(11) | 0.0009(9)   | -0.0013(9)  | 0.0098(9)   |
| N11            | 0.0193(12) | 0.0355(13) | 0.0193(11) | 0.0001(9)   | -0.0028(9)  | 0.0110(10)  |
| N12            | 0.0180(12) | 0.0351(13) | 0.0242(12) | -0.0010(10) | -0.0038(9)  | 0.0087(10)  |
| N13            | 0.0138(11) | 0.0295(13) | 0.0243(11) | -0.0020(9)  | -0.0015(9)  | 0.0063(9)   |



| Molecule No. 5 |            |            |            |             |             |             |
|----------------|------------|------------|------------|-------------|-------------|-------------|
| C1             | 0.0138(13) | 0.0334(15) | 0.0229(13) | 0.0004(11)  | 0.0032(10)  | 0.0091(11)  |
| C2             | 0.0300(16) | 0.0227(15) | 0.0292(15) | 0.0027(11)  | 0.0091(12)  | 0.0056(12)  |
| C3             | 0.0283(16) | 0.0391(18) | 0.0301(15) | -0.0120(13) | 0.0003(12)  | 0.0022(13)  |
| C4             | 0.0300(17) | 0.074(3)   | 0.0221(14) | 0.0063(15)  | 0.0023(12)  | 0.0252(16)  |
| C5             | 0.0444(19) | 0.0441(19) | 0.0428(18) | 0.0260(16)  | 0.0188(15)  | 0.0260(16)  |
| C6             | 0.0297(16) | 0.0224(15) | 0.0438(17) | 0.0000(13)  | 0.0122(13)  | 0.0072(12)  |
| C7             | 0.0260(16) | 0.056(2)   | 0.0252(15) | -0.0059(13) | 0.0001(12)  | 0.0208(14)  |
| C8             | 0.0179(14) | 0.0329(16) | 0.0191(13) | 0.0012(11)  | 0.0018(10)  | 0.0081(12)  |
| C9             | 0.0087(12) | 0.0213(13) | 0.0252(13) | -0.0011(10) | -0.0006(10) | 0.0045(10)  |
| N10            | 0.0137(11) | 0.0334(13) | 0.0221(11) | -0.0024(9)  | -0.0012(9)  | 0.0086(10)  |
| N11            | 0.0183(12) | 0.0437(15) | 0.0206(11) | -0.0038(10) | -0.0009(9)  | 0.0105(11)  |
| N12            | 0.0194(13) | 0.0434(15) | 0.0202(11) | -0.0046(10) | -0.0035(9)  | 0.0100(11)  |
| N13            | 0.0168(11) | 0.0319(13) | 0.0205(11) | -0.0037(9)  | -0.0019(9)  | 0.0073(9)   |
| Molecule No. 6 |            |            |            |             |             |             |
| C1             | 0.0211(14) | 0.0294(15) | 0.0232(14) | 0.0077(11)  | 0.0025(11)  | 0.0003(12)  |
| C2             | 0.0215(15) | 0.0274(15) | 0.0345(16) | 0.0079(12)  | -0.0025(12) | 0.0025(12)  |
| C3             | 0.0271(16) | 0.0331(16) | 0.0273(14) | 0.0121(12)  | -0.0097(12) | -0.0063(13) |
| C4             | 0.0245(16) | 0.0465(18) | 0.0197(14) | 0.0061(12)  | 0.0005(11)  | -0.0061(13) |
| C5             | 0.0196(15) | 0.066(2)   | 0.0256(15) | 0.0011(14)  | 0.0041(12)  | 0.0108(15)  |
| C6             | 0.0191(15) | 0.058(2)   | 0.0237(14) | 0.0036(13)  | -0.0039(11) | 0.0136(14)  |
| C7             | 0.0258(15) | 0.0274(15) | 0.0245(14) | 0.0044(11)  | 0.0014(11)  | 0.0070(12)  |
| C8             | 0.0178(13) | 0.0258(14) | 0.0223(13) | 0.0013(11)  | 0.0008(10)  | 0.0047(11)  |
| C9             | 0.0128(13) | 0.0197(13) | 0.0253(13) | 0.0005(10)  | -0.0008(10) | 0.0048(10)  |
| N10            | 0.0126(11) | 0.0256(12) | 0.0231(11) | -0.0019(9)  | 0.0021(9)   | 0.0069(9)   |
| N11            | 0.0176(12) | 0.0290(13) | 0.0225(11) | -0.0022(9)  | 0.0022(9)   | 0.0055(10)  |
| N12            | 0.0206(12) | 0.0287(12) | 0.0262(12) | -0.0015(10) | 0.0032(9)   | 0.0064(10)  |
| N13            | 0.0144(11) | 0.0267(12) | 0.0254(11) | 0.0000(9)   | 0.0014(9)   | 0.0072(9)   |
| Molecule No. 7 |            |            |            |             |             |             |
| C1             | 0.0125(13) | 0.0318(15) | 0.0245(14) | -0.0005(11) | 0.0029(10)  | 0.0008(11)  |
| C2             | 0.0243(15) | 0.0252(15) | 0.0332(15) | 0.0069(12)  | -0.0034(12) | 0.0060(12)  |
| C3             | 0.0287(15) | 0.0263(15) | 0.0322(15) | -0.0029(12) | -0.0035(12) | 0.0060(12)  |
| C4             | 0.0185(14) | 0.0411(17) | 0.0249(14) | 0.0023(12)  | -0.0018(11) | 0.0059(12)  |
| C5             | 0.0218(15) | 0.0318(16) | 0.0323(15) | 0.0082(12)  | -0.0010(12) | 0.0082(12)  |
| C6             | 0.0178(14) | 0.0255(15) | 0.0362(15) | -0.0016(12) | 0.0045(12)  | 0.0040(11)  |
| C7             | 0.0214(15) | 0.0449(18) | 0.0248(15) | 0.0003(13)  | 0.0034(12)  | -0.0049(13) |
| C8             | 0.0138(13) | 0.0433(17) | 0.0204(13) | 0.0040(12)  | 0.0002(10)  | 0.0083(11)  |
| C9             | 0.0126(12) | 0.0266(14) | 0.0236(13) | 0.0044(11)  | 0.0037(10)  | 0.0064(10)  |
| N10            | 0.0127(11) | 0.0287(12) | 0.0254(12) | 0.0041(9)   | 0.0022(9)   | 0.0078(9)   |
| N11            | 0.0166(12) | 0.0405(14) | 0.0239(12) | 0.0008(10)  | 0.0012(9)   | 0.0090(10)  |
| N12            | 0.0182(12) | 0.0473(16) | 0.0219(12) | 0.0030(10)  | 0.0017(9)   | 0.0086(11)  |
| N13            | 0.0148(11) | 0.0404(14) | 0.0216(11) | 0.0043(10)  | 0.0017(9)   | 0.0097(10)  |
| Molecule No. 8 |            |            |            |             |             |             |
| C1             | 0.0225(14) | 0.0205(14) | 0.0213(13) | -0.0012(10) | 0.0005(11)  | 0.0021(11)  |
| C2             | 0.0265(15) | 0.0253(14) | 0.0257(14) | 0.0034(11)  | -0.0027(11) | 0.0092(12)  |
| C3             | 0.0196(14) | 0.0294(15) | 0.0278(14) | -0.0020(11) | 0.0013(11)  | 0.0075(11)  |
| C4             | 0.0236(14) | 0.0279(15) | 0.0188(13) | -0.0041(11) | 0.0002(11)  | 0.0035(11)  |
| C5             | 0.0255(15) | 0.0326(16) | 0.0202(14) | 0.0008(11)  | -0.0065(11) | 0.0058(12)  |
| C6             | 0.0191(14) | 0.0285(15) | 0.0253(14) | -0.0020(11) | -0.0001(11) | 0.0061(11)  |
| C7             | 0.0319(16) | 0.0267(15) | 0.0213(14) | 0.0031(11)  | 0.0051(12)  | 0.0069(12)  |
| C8             | 0.0205(14) | 0.0297(15) | 0.0191(13) | 0.0019(11)  | 0.0002(10)  | 0.0095(11)  |
| C9             | 0.0139(13) | 0.0213(13) | 0.0252(13) | 0.0018(10)  | -0.0009(10) | 0.0053(10)  |
| N10            | 0.0103(10) | 0.0312(13) | 0.0214(11) | 0.0017(9)   | 0.0024(8)   | 0.0076(9)   |
| N11            | 0.0206(12) | 0.0319(13) | 0.0224(12) | 0.0005(10)  | 0.0039(9)   | 0.0084(10)  |
| N12            | 0.0181(12) | 0.0287(12) | 0.0248(11) | 0.0022(9)   | 0.0047(9)   | 0.0072(9)   |
| N13            | 0.0140(11) | 0.0270(12) | 0.0252(12) | 0.0023(9)   | 0.0018(9)   | 0.0066(9)   |

The form of the anisotropic displacement parameter is:  
 $\exp[-2\pi(a^2U_{11}h^2+b^2U_{22}k^2+c^2U_{33}l^2+2b^*c^*U_{23}kl+2a^*c^*U_{13}hl+2a^*b^*U_{12}hk)]$

**Table 5. Bond Distances in Compound 1352, Å**

| Molecule No. 1 |          |         |          |         |          |
|----------------|----------|---------|----------|---------|----------|
| C1-C6          | 1.385(4) | C1-C2   | 1.390(4) | C1-C7   | 1.510(4) |
| C2-C3          | 1.381(4) | C3-C4   | 1.373(4) | C4-C5   | 1.390(4) |
| C5-C6          | 1.380(4) | C7-C8   | 1.518(4) | C8-C9   | 1.490(3) |
| C9-N13         | 1.319(3) | C9-N10  | 1.331(3) | N10-N11 | 1.342(3) |
| N11-N12        | 1.294(3) | N12-N13 | 1.363(3) |         |          |
| Molecule No. 2 |          |         |          |         |          |
| C1-C6          | 1.397(4) | C1-C2   | 1.398(4) | C1-C7   | 1.510(4) |
| C2-C3          | 1.381(4) | C3-C4   | 1.379(4) | C4-C5   | 1.398(4) |
| C5-C6          | 1.377(4) | C7-C8   | 1.538(4) | C8-C9   | 1.490(3) |
| C9-N13         | 1.325(3) | C9-N10  | 1.327(3) | N10-N11 | 1.339(3) |
| N11-N12        | 1.293(3) | N12-N13 | 1.367(3) |         |          |
| Molecule No. 3 |          |         |          |         |          |
| C1-C6          | 1.380(4) | C1-C2   | 1.391(4) | C1-C7   | 1.509(4) |
| C2-C3          | 1.379(4) | C3-C4   | 1.374(4) | C4-C5   | 1.382(4) |
| C5-C6          | 1.380(4) | C7-C8   | 1.491(4) | C8-C9   | 1.480(4) |
| C9-N13         | 1.328(4) | C9-N10  | 1.339(3) | N10-N11 | 1.337(3) |
| N11-N12        | 1.292(3) | N12-N13 | 1.365(3) |         |          |
| Molecule No. 4 |          |         |          |         |          |
| C1-C6          | 1.387(4) | C1-C2   | 1.392(4) | C1-C7   | 1.515(4) |
| C2-C3          | 1.386(4) | C3-C4   | 1.385(4) | C4-C5   | 1.377(4) |
| C5-C6          | 1.392(4) | C7-C8   | 1.532(4) | C8-C9   | 1.489(3) |
| C9-N13         | 1.333(3) | C9-N10  | 1.338(3) | N10-N11 | 1.339(3) |
| N11-N12        | 1.292(3) | N12-N13 | 1.364(3) |         |          |
| Molecule No. 5 |          |         |          |         |          |
| C1-C2          | 1.377(4) | C1-C6   | 1.381(4) | C1-C7   | 1.508(4) |
| C2-C3          | 1.384(4) | C3-C4   | 1.360(5) | C4-C5   | 1.376(5) |
| C5-C6          | 1.382(4) | C7-C8   | 1.525(4) | C8-C9   | 1.493(3) |
| C9-N13         | 1.324(3) | C9-N10  | 1.325(3) | N10-N11 | 1.350(3) |
| N11-N12        | 1.290(3) | N12-N13 | 1.365(3) |         |          |
| Molecule No. 6 |          |         |          |         |          |
| C1-C6          | 1.392(4) | C1-C2   | 1.393(4) | C1-C7   | 1.518(4) |
| C2-C3          | 1.386(4) | C3-C4   | 1.375(5) | C4-C5   | 1.382(4) |
| C5-C6          | 1.382(4) | C7-C8   | 1.534(4) | C8-C9   | 1.498(3) |
| C9-N13         | 1.326(3) | C9-N10  | 1.332(3) | N10-N11 | 1.344(3) |
| N11-N12        | 1.297(3) | N12-N13 | 1.362(3) |         |          |
| Molecule No. 7 |          |         |          |         |          |
| C1-C6          | 1.383(4) | C1-C2   | 1.396(4) | C1-C7   | 1.516(4) |
| C2-C3          | 1.377(4) | C3-C4   | 1.384(4) | C4-C5   | 1.381(4) |
| C5-C6          | 1.386(4) | C7-C8   | 1.513(4) | C8-C9   | 1.488(4) |
| C9-N13         | 1.322(3) | C9-N10  | 1.337(3) | N10-N11 | 1.345(3) |
| N11-N12        | 1.293(3) | N12-N13 | 1.366(3) |         |          |
| Molecule No. 8 |          |         |          |         |          |
| C1-C6          | 1.391(4) | C1-C2   | 1.405(4) | C1-C7   | 1.512(4) |
| C2-C3          | 1.386(4) | C3-C4   | 1.385(4) | C4-C5   | 1.388(4) |
| C5-C6          | 1.386(4) | C7-C8   | 1.530(4) | C8-C9   | 1.492(3) |
| C9-N13         | 1.326(3) | C9-N10  | 1.333(3) | N10-N11 | 1.344(3) |
| N11-N12        | 1.296(3) | N12-N13 | 1.359(3) |         |          |

**Table 6. Bond Angles in Compound 1352, °**

| Molecule No. 1 |          |            |          |             |          |
|----------------|----------|------------|----------|-------------|----------|
| C6-C1-C2       | 118.6(2) | C6-C1-C7   | 120.6(3) | C2-C1-C7    | 120.8(3) |
| C3-C2-C1       | 120.6(3) | C4-C3-C2   | 120.4(3) | C3-C4-C5    | 119.6(3) |
| C6-C5-C4       | 119.9(3) | C5-C6-C1   | 120.8(3) | C1-C7-C8    | 112.6(2) |
| C9-C8-C7       | 112.8(2) | N13-C9-N10 | 107.3(2) | N13-C9-C8   | 126.1(2) |
| N10-C9-C8      | 126.7(2) | C9-N10-N11 | 110.1(2) | N12-N11-N10 | 105.7(2) |
| N11-N12-N13    | 110.5(2) | C9-N13-N12 | 106.5(2) |             |          |
| Molecule No. 2 |          |            |          |             |          |
| C6-C1-C2       | 117.9(3) | C6-C1-C7   | 121.6(2) | C2-C1-C7    | 120.4(2) |
| C3-C2-C1       | 121.2(3) | C4-C3-C2   | 120.3(3) | C3-C4-C5    | 119.4(3) |
| C6-C5-C4       | 120.3(3) | C5-C6-C1   | 121.0(3) | C1-C7-C8    | 110.6(2) |
| C9-C8-C7       | 114.4(2) | N13-C9-N10 | 106.8(2) | N13-C9-C8   | 127.0(2) |
| N10-C9-C8      | 126.1(2) | C9-N10-N11 | 110.5(2) | N12-N11-N10 | 106.0(2) |
| N11-N12-N13    | 110.0(2) | C9-N13-N12 | 106.7(2) |             |          |
| Molecule No. 3 |          |            |          |             |          |
| C6-C1-C2       | 118.2(3) | C6-C1-C7   | 120.0(3) | C2-C1-C7    | 121.8(3) |
| C3-C2-C1       | 120.3(3) | C4-C3-C2   | 121.0(3) | C3-C4-C5    | 119.1(3) |
| C6-C5-C4       | 119.9(3) | C5-C6-C1   | 121.5(3) | C8-C7-C1    | 113.8(3) |
| C9-C8-C7       | 114.4(2) | N13-C9-N10 | 106.9(2) | N13-C9-C8   | 126.4(2) |
| N10-C9-C8      | 126.7(2) | N11-N10-C9 | 109.9(2) | N12-N11-N10 | 106.4(2) |
| N11-N12-N13    | 110.3(2) | C9-N13-N12 | 106.5(2) |             |          |
| Molecule No. 4 |          |            |          |             |          |
| C6-C1-C2       | 117.9(2) | C6-C1-C7   | 120.8(2) | C2-C1-C7    | 121.2(3) |
| C3-C2-C1       | 121.2(3) | C4-C3-C2   | 120.1(3) | C5-C4-C3    | 119.6(3) |
| C4-C5-C6       | 120.1(3) | C1-C6-C5   | 121.2(3) | C1-C7-C8    | 112.6(2) |
| C9-C8-C7       | 112.6(2) | N13-C9-N10 | 106.5(2) | N13-C9-C8   | 128.2(2) |
| N10-C9-C8      | 125.3(2) | C9-N10-N11 | 110.6(2) | N12-N11-N10 | 105.6(2) |
| N11-N12-N13    | 110.9(2) | C9-N13-N12 | 106.4(2) |             |          |
| Molecule No. 5 |          |            |          |             |          |
| C2-C1-C6       | 118.1(3) | C2-C1-C7   | 121.3(3) | C6-C1-C7    | 120.5(3) |
| C1-C2-C3       | 120.7(3) | C4-C3-C2   | 120.7(3) | C3-C4-C5    | 119.4(3) |
| C4-C5-C6       | 119.9(3) | C1-C6-C5   | 121.0(3) | C1-C7-C8    | 112.9(2) |
| C9-C8-C7       | 112.1(2) | N13-C9-N10 | 108.0(2) | N13-C9-C8   | 125.8(2) |
| N10-C9-C8      | 126.1(2) | C9-N10-N11 | 109.2(2) | N12-N11-N10 | 106.4(2) |
| N11-N12-N13    | 110.3(2) | C9-N13-N12 | 106.1(2) |             |          |
| Molecule No. 6 |          |            |          |             |          |
| C6-C1-C2       | 118.1(3) | C6-C1-C7   | 120.9(2) | C2-C1-C7    | 121.0(3) |
| C3-C2-C1       | 120.7(3) | C4-C3-C2   | 120.7(3) | C3-C4-C5    | 119.1(3) |
| C4-C5-C6       | 120.6(3) | C5-C6-C1   | 120.8(3) | C1-C7-C8    | 110.7(2) |
| C9-C8-C7       | 113.6(2) | N13-C9-N10 | 107.0(2) | N13-C9-C8   | 127.2(2) |
| N10-C9-C8      | 125.8(2) | C9-N10-N11 | 110.1(2) | N12-N11-N10 | 105.9(2) |
| N11-N12-N13    | 110.2(2) | C9-N13-N12 | 106.8(2) |             |          |
| Molecule No. 7 |          |            |          |             |          |
| C6-C1-C2       | 118.5(3) | C6-C1-C7   | 121.5(3) | C2-C1-C7    | 120.0(3) |
| C3-C2-C1       | 121.0(3) | C2-C3-C4   | 119.9(3) | C5-C4-C3    | 119.7(3) |
| C4-C5-C6       | 120.2(3) | C1-C6-C5   | 120.7(3) | C8-C7-C1    | 112.8(2) |
| C9-C8-C7       | 112.9(2) | N13-C9-N10 | 107.1(2) | N13-C9-C8   | 126.3(2) |
| N10-C9-C8      | 126.6(2) | C9-N10-N11 | 109.9(2) | N12-N11-N10 | 106.0(2) |
| N11-N12-N13    | 110.3(2) | C9-N13-N12 | 106.7(2) |             |          |
| Molecule No. 8 |          |            |          |             |          |
| C6-C1-C2       | 118.0(2) | C6-C1-C7   | 121.6(2) | C2-C1-C7    | 120.4(2) |
| C3-C2-C1       | 120.6(3) | C4-C3-C2   | 120.5(3) | C3-C4-C5    | 119.5(2) |
| C6-C5-C4       | 120.0(3) | C5-C6-C1   | 121.4(3) | C1-C7-C8    | 112.5(2) |
| C9-C8-C7       | 113.4(2) | N13-C9-N10 | 107.0(2) | N13-C9-C8   | 127.8(2) |
| N10-C9-C8      | 125.3(2) | C9-N10-N11 | 109.8(2) | N12-N11-N10 | 106.3(2) |
| N11-N12-N13    | 110.0(2) | C9-N13-N12 | 107.0(2) |             |          |

---

<sup>i</sup>. Sheldrick, G.M. (2008) CELL\_NOW. University of Gottingen, Germany.

<sup>ii</sup>Bruker (2009) SAINT. Bruker AXS Inc., Madison, Wisconsin, USA.

<sup>iii</sup>Bruker (2009) SHELXTL. Bruker AXS Inc., Madison, Wisconsin, USA.

<sup>iv</sup>Sheldrick, G.M. (2008) TWINABS. University of Gottingen, Germany.

<sup>v</sup>Sheldrick, G.M. (2008) Acta Cryst. A64,112-122.

<sup>vi</sup>Sheldrick, G.M. (2008) Acta Cryst. A64,112-122.

<sup>vii</sup> $R1 = \sum |F_o| - |F_c| / \sum |F_o|$

$wR2 = [\sum w(F_o^2 - F_c^2)^2 / \sum w(F_o^2)]^{1/2}$

$GOF = [\sum w(F_o^2 - F_c^2)^2 / (n - p)]^{1/2}$

where n = the number of reflections and p = the number of parameters refined.

<sup>viii</sup>“ORTEP-II: A Fortran Thermal Ellipsoid Plot Program for Crystal Structure Illustrations”. C.K. Johnson (1976) ORNL-5138.

### X-ray Structure Determination of Compound 1411 (i.e., compound 17; CCDC 1427583)

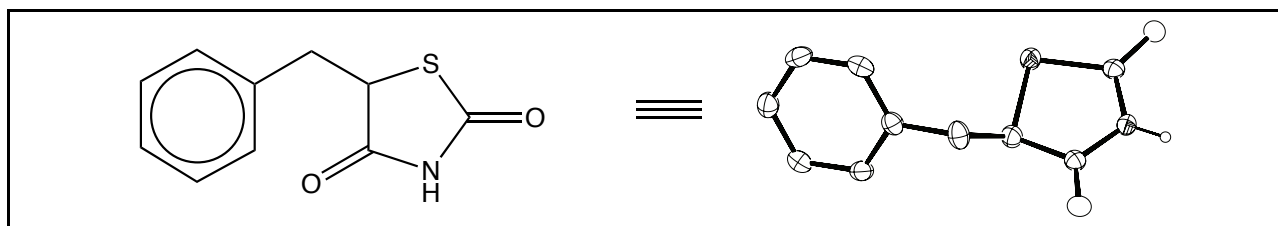

Compound 1411,  $C_{10}H_8NSO_2$ , crystallizes in the monoclinic space group  $P2_1/c$  (systematic absences  $0k0$ :  $k=\text{odd}$  and  $h0l$ :  $l=\text{odd}$ ) with  $a=13.0321(5)\text{\AA}$ ,  $b=5.7266(2)\text{\AA}$ ,  $c=12.9853(5)\text{\AA}$ ,  $\beta=104.646(2)^\circ$ ,  $V=937.60(6)\text{\AA}^3$ ,  $Z=4$ , and  $d_{\text{calc}}=1.461\text{ g/cm}^3$ . X-ray intensity data were collected on a Bruker APEXII CCD area detector employing graphite-monochromated Mo- $K\alpha$  radiation ( $\lambda=0.71073\text{ \AA}$ ) at a temperature of  $100(1)\text{K}$ . Preliminary indexing was performed from a series of thirty-six  $0.5^\circ$  rotation frames with exposures of 10 seconds. A total of 3299 frames were collected with a crystal to detector distance of 41.8 mm, rotation widths of  $0.5^\circ$  and exposures of 20 seconds:

| scan type | $2\theta$ | $\omega$ | $\phi$ | $\chi$ | frames |
|-----------|-----------|----------|--------|--------|--------|
| $\phi$    | 24.50     | 12.92    | 9.41   | 19.46  | 733    |
| $\omega$  | -25.50    | 1.98     | 240.26 | -33.72 | 69     |
| $\omega$  | 22.00     | 329.15   | 145.44 | 54.21  | 121    |
| $\phi$    | 14.50     | 10.63    | 50.08  | 50.72  | 664    |
| $\phi$    | -20.50    | 295.58   | 14.27  | 30.75  | 737    |
| $\phi$    | -25.50    | 286.57   | 24.44  | 52.47  | 739    |
| $\omega$  | -23.00    | 330.21   | 13.70  | -96.00 | 92     |
| $\omega$  | 22.00     | 315.82   | 285.01 | 93.16  | 144    |

The crystal grew as a non-merohedral twin; the program CELL\_NOW<sup>1</sup> was used to index the diffraction images and to determine the twinning mechanism. The crystal was twinned by a rotation of  $180^\circ$  about the 001 real direction. Rotation frames were integrated using SAINT<sup>2</sup>, producing a listing of unaveraged  $F^2$  and  $\sigma(F^2)$  values which were then passed to the SHELXTL<sup>3</sup> program package for further processing and structure solution. A total of 33628 reflections were measured over the ranges  $1.62 \leq \theta \leq 25.40^\circ$ ,  $-15 \leq h \leq 15$ ,  $0 \leq k \leq 6$ ,  $0 \leq l \leq 15$  yielding 1759 unique reflections ( $R_{\text{int}} = 0.0609$ ). The intensity data were corrected for Lorentz and polarization effects and for absorption using TWINABS<sup>4</sup> (minimum and maximum transmission 0.5304, 0.7452).

The structure was solved by direct methods (SHELXS-97<sup>5</sup>). Refinement was by full-matrix least squares based on  $F^2$  using SHELXL-97.<sup>6</sup> All reflections were used during refinement. The weighting scheme used was  $w=1/[\sigma^2(F_o^2) + (0.0674P)^2 + 0.4014P]$  where  $P = (F_o^2 + 2F_c^2)/3$ . Non-hydrogen atoms were refined anisotropically and hydrogen atoms were refined using a riding model. Refinement converged to  $R1=0.0373$  and  $wR2=0.1039$  for 1643 observed reflections for which  $F > 4\sigma(F)$  and  $R1=0.0406$  and  $wR2=0.1070$  and  $GOF = 1.086$  for all 1759 unique, non-zero reflections and 129 variables.<sup>7</sup> The maximum  $\Delta/\sigma$  in the final cycle of least squares was 0.000 and the two most prominent peaks in the final difference Fourier were +0.802 and -0.303  $e/\text{\AA}^3$ . The twinning parameter refined to a value of 0.386(2).

Table 1. lists cell information, data collection parameters, and refinement data. Final positional and equivalent isotropic thermal parameters are given in Tables 2. and 3. Anisotropic thermal parameters are in Table 4. Tables 5. and 6. list bond distances and bond angles. Figure 1. is an ORTEP<sup>8</sup> representation of the molecule with 50% probability thermal ellipsoids displayed.

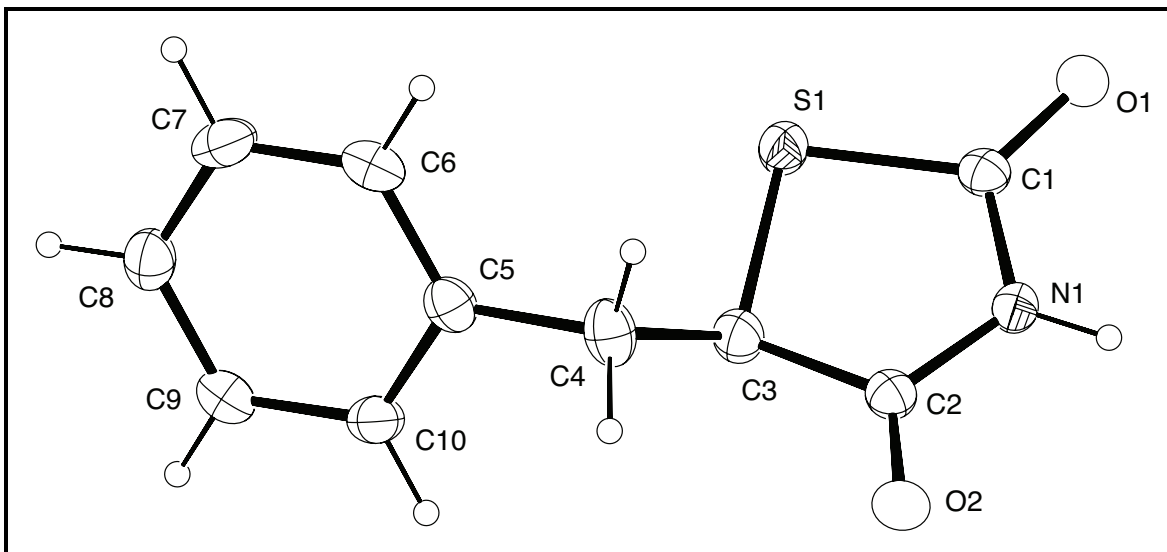

Figure 1. ORTEP drawing of the title compound with 50% probability thermal ellipsoids.

**Table 1. Summary of Structure Determination of Compound 1411**

|                                   |                                                 |
|-----------------------------------|-------------------------------------------------|
| Empirical formula                 | C <sub>10</sub> H <sub>8</sub> NSO <sub>2</sub> |
| Formula weight                    | 206.23                                          |
| Temperature                       | 100(1) K                                        |
| Wavelength                        | 0.71073 Å                                       |
| Crystal system                    | monoclinic                                      |
| Space group                       | P2 <sub>1</sub> /c                              |
| Cell constants:                   |                                                 |
| a                                 | 13.0321(5) Å                                    |
| b                                 | 5.7266(2) Å                                     |
| c                                 | 12.9853(5) Å                                    |
| β                                 | 104.646(2)°                                     |
| Volume                            | 937.60(6) Å <sup>3</sup>                        |
| Z                                 | 4                                               |
| Density (calculated)              | 1.461 Mg/m <sup>3</sup>                         |
| Absorption coefficient            | 0.314 mm <sup>-1</sup>                          |
| F(000)                            | 428                                             |
| Crystal size                      | 0.25 x 0.18 x 0.03 mm <sup>3</sup>              |
| Theta range for data collection   | 1.62 to 25.40°                                  |
| Index ranges                      | -15 ≤ h ≤ 15, 0 ≤ k ≤ 6, 0 ≤ l ≤ 15             |
| Reflections collected             | 33628                                           |
| Independent reflections           | 1759 [R(int) = 0.0609]                          |
| Completeness to theta = 25.40°    | 99.9 %                                          |
| Absorption correction             | Semi-empirical from equivalents                 |
| Max. and min. transmission        | 0.7452 and 0.5304                               |
| Refinement method                 | Full-matrix least-squares on F <sup>2</sup>     |
| Data / restraints / parameters    | 1759 / 0 / 129                                  |
| Goodness-of-fit on F <sup>2</sup> | 1.086                                           |
| Final R indices [I > 2σ(I)]       | R1 = 0.0373, wR2 = 0.1039                       |
| R indices (all data)              | R1 = 0.0406, wR2 = 0.1070                       |
| Largest diff. peak and hole       | 0.802 and -0.303 e.Å <sup>-3</sup>              |

**Table 2. Refined Positional Parameters for Compound 1411**

| Atom | x           | y          | z           | $U_{eq}, \text{Å}^2$ |
|------|-------------|------------|-------------|----------------------|
| S1   | 0.72871(4)  | 1.01301(9) | 0.36873(5)  | 0.02286(19)          |
| O1   | 0.61652(12) | 1.1808(3)  | 0.49601(13) | 0.0231(4)            |
| O2   | 0.53075(13) | 0.5020(2)  | 0.31211(14) | 0.0244(4)            |
| N1   | 0.56672(14) | 0.8250(3)  | 0.41840(14) | 0.0198(4)            |
| C1   | 0.62877(18) | 1.0216(4)  | 0.43811(17) | 0.0193(5)            |
| C2   | 0.58659(17) | 0.6669(4)  | 0.34594(16) | 0.0199(5)            |
| C3   | 0.69046(19) | 0.7211(4)  | 0.3164(2)   | 0.0234(5)            |
| C4   | 0.67844(18) | 0.6939(5)  | 0.19728(19) | 0.0266(5)            |
| C5   | 0.78182(19) | 0.7014(4)  | 0.16524(19) | 0.0224(5)            |
| C6   | 0.80636(19) | 0.8893(4)  | 0.10833(19) | 0.0254(5)            |
| C7   | 0.89948(19) | 0.8914(4)  | 0.07532(19) | 0.0281(5)            |
| C8   | 0.96903(19) | 0.7040(4)  | 0.0981(2)   | 0.0261(5)            |
| C9   | 0.94660(19) | 0.5176(4)  | 0.1559(2)   | 0.0245(5)            |
| C10  | 0.85309(19) | 0.5158(4)  | 0.1891(2)   | 0.0233(5)            |

$U_{eq} = \frac{1}{3}[U_{11}(aa^*)^2 + U_{22}(bb^*)^2 + U_{33}(cc^*)^2 + 2U_{12}aa^*bb^*\cos\gamma + 2U_{13}aa^*cc^*\cos\beta + 2U_{23}bb^*cc^*\cos\alpha]$

**Table 3. Positional Parameters for Hydrogens in Compound 1411**

| Atom | x      | y      | z      | $U_{iso}, \text{Å}^2$ |
|------|--------|--------|--------|-----------------------|
| H1   | 0.5172 | 0.8014 | 0.4502 | 0.026                 |
| H4a  | 0.6436 | 0.5463 | 0.1743 | 0.035                 |
| H4b  | 0.6328 | 0.8175 | 0.1603 | 0.035                 |
| H6   | 0.7599 | 1.0150 | 0.0922 | 0.034                 |
| H7   | 0.9154 | 1.0189 | 0.0378 | 0.037                 |
| H8   | 1.0306 | 0.7042 | 0.0743 | 0.035                 |
| H9   | 0.9938 | 0.3933 | 0.1728 | 0.033                 |
| H10  | 0.8379 | 0.3893 | 0.2276 | 0.031                 |

**Table 4. Refined Thermal Parameters (U's) for Compound 1411**

| Atom | $U_{11}$   | $U_{22}$   | $U_{33}$   | $U_{23}$    | $U_{13}$   | $U_{12}$    |
|------|------------|------------|------------|-------------|------------|-------------|
| S1   | 0.0233(3)  | 0.0227(3)  | 0.0246(3)  | -0.0034(2)  | 0.0098(3)  | -0.0042(2)  |
| O1   | 0.0272(8)  | 0.0204(8)  | 0.0234(8)  | -0.0019(6)  | 0.0091(7)  | -0.0009(6)  |
| O2   | 0.0272(8)  | 0.0192(9)  | 0.0269(9)  | -0.0034(6)  | 0.0070(7)  | -0.0033(6)  |
| N1   | 0.0201(9)  | 0.0205(9)  | 0.0203(10) | -0.0005(8)  | 0.0078(7)  | -0.0013(7)  |
| C1   | 0.0212(10) | 0.0181(11) | 0.0177(11) | 0.0020(8)   | 0.0030(9)  | 0.0019(8)   |
| C2   | 0.0214(10) | 0.0194(10) | 0.0184(11) | 0.0015(8)   | 0.0041(8)  | 0.0024(9)   |
| C3   | 0.0242(12) | 0.0229(12) | 0.0246(12) | -0.0046(9)  | 0.0089(10) | -0.0035(9)  |
| C4   | 0.0221(11) | 0.0349(14) | 0.0225(12) | -0.0067(10) | 0.0049(9)  | 0.0000(10)  |
| C5   | 0.0238(11) | 0.0230(12) | 0.0197(11) | -0.0053(9)  | 0.0041(9)  | -0.0009(9)  |
| C6   | 0.0291(11) | 0.0187(12) | 0.0260(12) | -0.0027(9)  | 0.0024(9)  | 0.0031(9)   |
| C7   | 0.0361(13) | 0.0215(13) | 0.0268(12) | 0.0039(9)   | 0.0080(11) | -0.0059(10) |
| C8   | 0.0237(11) | 0.0298(13) | 0.0264(12) | -0.0055(10) | 0.0092(10) | -0.0043(9)  |
| C9   | 0.0258(12) | 0.0207(12) | 0.0256(13) | -0.0021(9)  | 0.0042(9)  | 0.0040(9)   |
| C10  | 0.0306(12) | 0.0179(12) | 0.0216(12) | 0.0007(9)   | 0.0067(10) | -0.0012(8)  |

The form of the anisotropic displacement parameter is:

$$\exp[-2\pi(a^*U_{11}h^2 + b^*U_{22}k^2 + c^*U_{33}l^2 + 2b^*c^*U_{23}kl + 2a^*c^*U_{13}hl + 2a^*b^*U_{12}hk)]$$



**Table 5. Bond Distances in Compound 1411, Å**

|       |          |        |          |        |          |
|-------|----------|--------|----------|--------|----------|
| S1-C1 | 1.762(2) | S1-C3  | 1.826(2) | O1-C1  | 1.218(3) |
| O2-C2 | 1.206(3) | N1-C1  | 1.372(3) | N1-C2  | 1.377(3) |
| C2-C3 | 1.529(3) | C3-C4  | 1.523(3) | C4-C5  | 1.508(3) |
| C5-C6 | 1.387(3) | C5-C10 | 1.394(3) | C6-C7  | 1.386(3) |
| C7-C8 | 1.387(3) | C8-C9  | 1.379(3) | C9-C10 | 1.391(3) |

**Table 6. Bond Angles in Compound 1411, °**

|           |            |           |            |           |          |
|-----------|------------|-----------|------------|-----------|----------|
| C1-S1-C3  | 92.76(10)  | C1-N1-C2  | 117.60(18) | O1-C1-N1  | 124.5(2) |
| O1-C1-S1  | 124.46(17) | N1-C1-S1  | 111.03(16) | O2-C2-N1  | 124.3(2) |
| O2-C2-C3  | 124.0(2)   | N1-C2-C3  | 111.68(19) | C4-C3-C2  | 111.3(2) |
| C4-C3-S1  | 114.82(17) | C2-C3-S1  | 105.55(15) | C5-C4-C3  | 114.1(2) |
| C6-C5-C10 | 118.6(2)   | C6-C5-C4  | 120.8(2)   | C10-C5-C4 | 120.6(2) |
| C7-C6-C5  | 120.6(2)   | C6-C7-C8  | 120.2(2)   | C9-C8-C7  | 119.8(2) |
| C8-C9-C10 | 119.8(2)   | C9-C10-C5 | 120.8(2)   |           |          |

---

<sup>1</sup> Sheldrick, G.M. (2008) CELL\_NOW. University of Gottingen, Germany.

<sup>2</sup> Bruker (2009) SAINT. Bruker AXS Inc., Madison, Wisconsin, USA.

<sup>3</sup> Bruker (2009) SHELXTL. Bruker AXS Inc., Madison, Wisconsin, USA.

<sup>4</sup> Sheldrick, G.M. (2007) TWINABS. University of Gottingen, Germany.

<sup>5</sup> Sheldrick, G.M. (2008) Acta Cryst. A64,112-122.

<sup>6</sup> Sheldrick, G.M. (2008) Acta Cryst. A64,112-122.

<sup>7</sup>  $R1 = \sum |F_o| - |F_c| / \sum |F_o|$

$wR2 = [\sum w(F_o^2 - F_c^2)^2 / \sum w(F_o^2)^2]^{1/2}$

$GOF = [\sum w(F_o^2 - F_c^2)^2 / (n - p)]^{1/2}$

where n = the number of reflections and p = the number of parameters refined.

<sup>8</sup> "ORTEP-II: A Fortran Thermal Ellipsoid Plot Program for Crystal Structure Illustrations". C.K. Johnson (1976) ORNL-5138.

## X-ray Structure Determination of Compound 1373 (i.e., compound 18; CCDC 1427834)

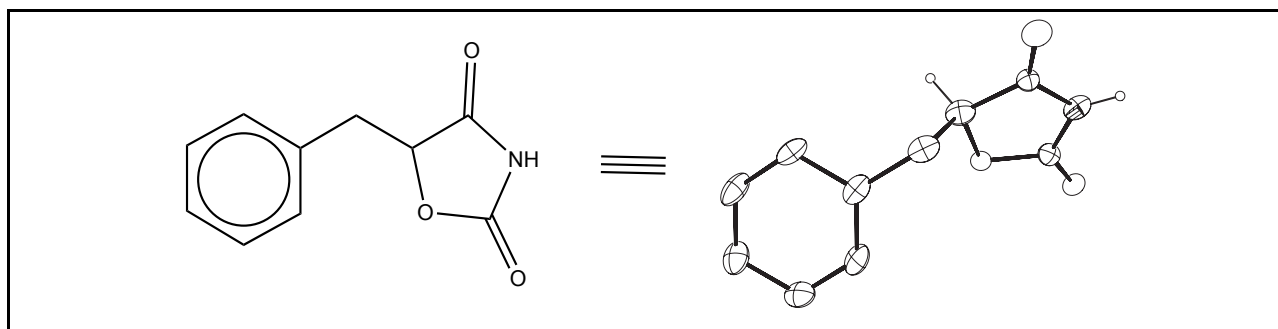

Compound 1373,  $C_{10}H_9NO_3$ , crystallizes in the orthorhombic space group  $Pca2_1$  (systematic absences  $h0l$ :  $h=odd$  and  $0kl$ :  $l=odd$ ) with  $a=7.3827(4)\text{\AA}$ ,  $b=6.3470(4)\text{\AA}$ ,  $c=38.163(2)\text{\AA}$ ,  $V=1788.24(18)\text{\AA}^3$ ,  $Z=8$ , and  $d_{calc}=1.420\text{ g/cm}^3$ . X-ray intensity data were collected on a Bruker APEXII CCD area detector employing graphite-monochromated Mo- $K\alpha$  radiation ( $\lambda=0.71073\text{ \AA}$ ) at a temperature of  $100(1)\text{K}$ . Preliminary indexing was performed from a series of thirty-six  $0.5^\circ$  rotation frames with exposures of 10 seconds. A total of 2217 frames were collected with a crystal to detector distance of 59.9 mm, rotation widths of  $0.5^\circ$  and exposures of 30 seconds:

| scan type | $2\theta$ | $\omega$ | $\phi$ | $\chi$ | frames |
|-----------|-----------|----------|--------|--------|--------|
| $\phi$    | -23.00    | 334.99   | 345.26 | -33.72 | 738    |
| $\phi$    | 32.00     | 44.52    | 349.55 | -24.38 | 739    |
| $\phi$    | 32.00     | 13.64    | 198.15 | 70.63  | 93     |
| $\omega$  | -25.50    | 217.37   | 309.98 | 28.88  | 309    |
| $\omega$  | 24.50     | 174.25   | 220.05 | -99.10 | 69     |
| $\omega$  | 17.00     | 321.50   | 294.44 | 82.07  | 145    |
| $\omega$  | 19.50     | 122.35   | 279.85 | -91.87 | 124    |

Rotation frames were integrated using SAINT<sup>i</sup>, producing a listing of unaveraged  $F^2$  and  $\sigma(F^2)$  values which were then passed to the SHELXTL<sup>ii</sup> program package for further processing and structure solution. A total of 19655 reflections were measured over the ranges  $2.13 \leq \theta \leq 25.37^\circ$ ,  $-8 \leq h \leq 8$ ,  $-7 \leq k \leq 7$ ,  $-45 \leq l \leq 46$  yielding 3273 unique reflections ( $R_{int} = 0.0557$ ). The intensity data were corrected for Lorentz and polarization effects and for absorption using SADABS<sup>iii</sup> (minimum and maximum transmission 0.6290, 0.7452).

The structure was solved by direct methods (SHELXS-97<sup>iv</sup>). The asymmetric unit consists of two

molecules, which form a hydrogen-bonded dimer. Refinement was by full-matrix least squares based on  $F^2$  using SHELXL-97.<sup>v</sup> All reflections were used during refinement. The weighting scheme used was  $w=1/[\sigma^2(F_o^2) + (0.0000P)^2 + 14.6871P]$  where  $P = (F_o^2 + 2F_c^2)/3$ . Non-hydrogen atoms were refined anisotropically and hydrogen atoms were refined using a riding model. Refinement converged to  $R1=0.0948$  and  $wR2=0.2086$  for 2824 observed reflections for which  $F > 4\sigma(F)$  and  $R1=0.1067$  and  $wR2=0.2142$  and  $GOF = 1.153$  for all 3273 unique, non-zero reflections and 254 variables.<sup>vi</sup> The maximum  $\Delta/\sigma$  in the final cycle of least squares was 0.000 and the two most prominent peaks in the final difference Fourier were  $+0.516$  and  $-0.654 e/\text{\AA}^3$ .

Table 1. lists cell information, data collection parameters, and refinement data. Final positional and equivalent isotropic thermal parameters are given in Tables 2. and 3. Anisotropic thermal parameters are in Table 4. Tables 5. and 6. list bond distances and bond angles. Figure 1. is an ORTEP<sup>vii</sup> representation of the molecule with 50% probability thermal ellipsoids displayed.

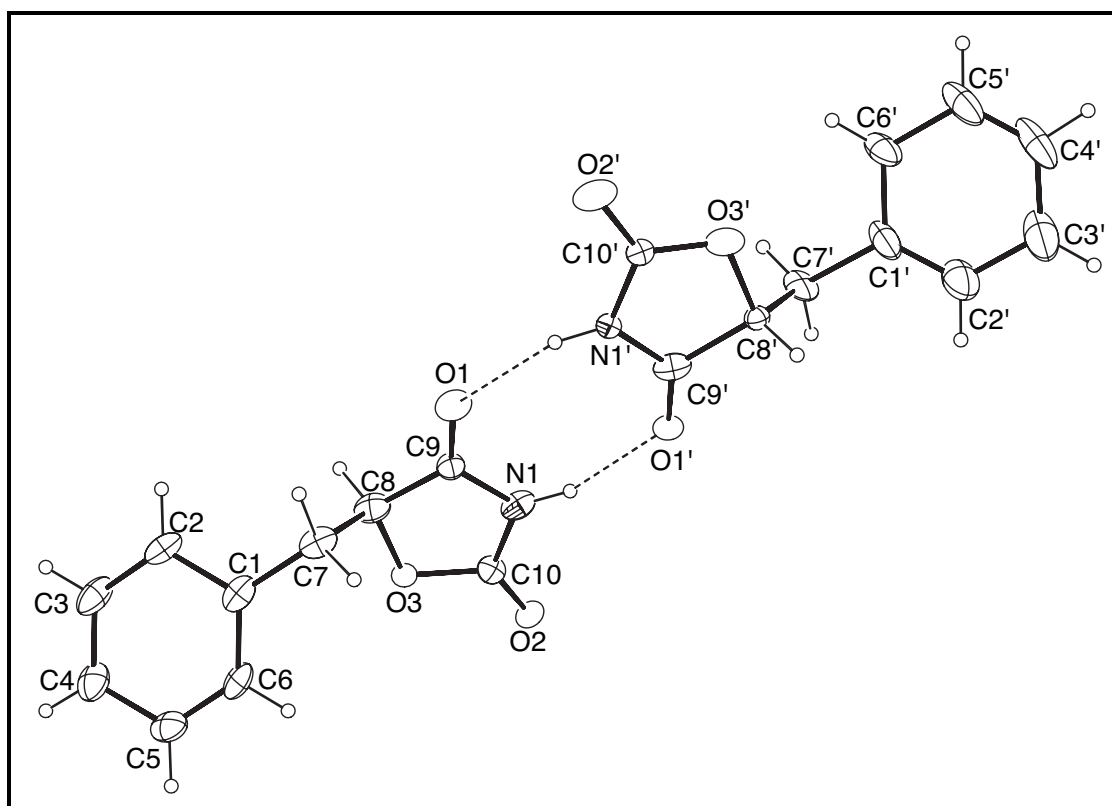

Figure 1. ORTEP drawing of the two molecules in the asymmetric unit, showing the hydrogen bonding.

**Table 1. Summary of Structure Determination of Compound 1373**

|                                   |                                                |
|-----------------------------------|------------------------------------------------|
| Empirical formula                 | C <sub>10</sub> H <sub>9</sub> NO <sub>3</sub> |
| Formula weight                    | 191.18                                         |
| Temperature                       | 100(1) K                                       |
| Wavelength                        | 0.71073 Å                                      |
| Crystal system                    | orthorhombic                                   |
| Space group                       | Pca2 <sub>1</sub>                              |
| Cell constants:                   |                                                |
| a                                 | 7.3827(4) Å                                    |
| b                                 | 6.3470(4) Å                                    |
| c                                 | 38.163(2) Å                                    |
| Volume                            | 1788.24(18) Å <sup>3</sup>                     |
| Z                                 | 8                                              |
| Density (calculated)              | 1.420 Mg/m <sup>3</sup>                        |
| Absorption coefficient            | 0.106 mm <sup>-1</sup>                         |
| F(000)                            | 800                                            |
| Crystal size                      | 0.18 x 0.12 x 0.06 mm <sup>3</sup>             |
| Theta range for data collection   | 2.13 to 25.37°                                 |
| Index ranges                      | -8 ≤ h ≤ 8, -7 ≤ k ≤ 7, -45 ≤ l ≤ 46           |
| Reflections collected             | 19655                                          |
| Independent reflections           | 3273 [R(int) = 0.0557]                         |
| Completeness to theta = 25.37°    | 99.8 %                                         |
| Absorption correction             | Semi-empirical from equivalents                |
| Max. and min. transmission        | 0.7452 and 0.6290                              |
| Refinement method                 | Full-matrix least-squares on F <sup>2</sup>    |
| Data / restraints / parameters    | 3273 / 299 / 254                               |
| Goodness-of-fit on F <sup>2</sup> | 1.153                                          |
| Final R indices [I > 2σ(I)]       | R1 = 0.0948, wR2 = 0.2086                      |
| R indices (all data)              | R1 = 0.1067, wR2 = 0.2142                      |
| Absolute structure parameter      | 0(4)                                           |
| Largest diff. peak and hole       | 0.516 and -0.654 e.Å <sup>-3</sup>             |

**Table 2. Refined Positional Parameters for Compound 1373**

| Atom | x          | y          | z           | $U_{eq}, \text{Å}^2$ |
|------|------------|------------|-------------|----------------------|
| C1   | 0.5970(10) | 0.2342(13) | 0.4534(2)   | 0.0232(15)           |
| C2   | 0.5484(10) | 0.4118(14) | 0.4321(2)   | 0.0283(17)           |
| C3   | 0.6107(11) | 0.4151(16) | 0.3984(3)   | 0.033(2)             |
| C4   | 0.7184(10) | 0.2659(15) | 0.3840(3)   | 0.0323(19)           |
| C5   | 0.7689(11) | 0.0922(15) | 0.4056(3)   | 0.0303(19)           |
| C6   | 0.7073(10) | 0.0854(15) | 0.4391(2)   | 0.0295(18)           |
| C7   | 0.5270(9)  | 0.2218(14) | 0.4911(2)   | 0.0235(15)           |
| C8   | 0.6344(9)  | 0.3474(15) | 0.5177(2)   | 0.0274(16)           |
| C9   | 0.5637(9)  | 0.3084(13) | 0.5536(2)   | 0.0188(14)           |
| C10  | 0.8614(10) | 0.2189(13) | 0.5541(2)   | 0.0207(15)           |
| N1   | 0.7046(8)  | 0.2375(10) | 0.5737(2)   | 0.0228(14)           |
| O1   | 0.4063(6)  | 0.3381(9)  | 0.56326(15) | 0.0219(11)           |
| O2   | 1.0049(6)  | 0.1625(9)  | 0.56248(15) | 0.0205(10)           |
| O3   | 0.8191(6)  | 0.2753(8)  | 0.51958(13) | 0.0164(10)           |
| C1'  | 0.3797(11) | 0.2592(19) | 0.7507(2)   | 0.036(2)             |
| C2'  | 0.4295(12) | 0.101(2)   | 0.7713(3)   | 0.047(2)             |
| C3'  | 0.3721(13) | 0.078(2)   | 0.8066(3)   | 0.051(3)             |
| C4'  | 0.2580(11) | 0.241(2)   | 0.8194(3)   | 0.045(2)             |
| C5'  | 0.2022(12) | 0.391(2)   | 0.7995(2)   | 0.045(2)             |
| C6'  | 0.2643(10) | 0.4154(17) | 0.7642(2)   | 0.035(2)             |
| C7'  | 0.4422(9)  | 0.2882(17) | 0.7135(2)   | 0.0304(19)           |
| C8'  | 0.3366(8)  | 0.1567(12) | 0.68767(19) | 0.0158(13)           |
| C9'  | 0.4059(9)  | 0.1826(13) | 0.6499(2)   | 0.0226(15)           |
| C10' | 0.1120(9)  | 0.2750(12) | 0.6521(2)   | 0.0180(14)           |
| N1'  | 0.2639(8)  | 0.2461(9)  | 0.63116(18) | 0.0148(12)           |
| O1'  | 0.5606(6)  | 0.1518(9)  | 0.64081(14) | 0.0202(11)           |
| O2'  | -0.0419(6) | 0.3427(10) | 0.64264(18) | 0.0316(13)           |
| O3'  | 0.1467(6)  | 0.2357(9)  | 0.68492(15) | 0.0239(12)           |

$U_{eq} = \frac{1}{3}[U_{11}(aa^*)^2 + U_{22}(bb^*)^2 + U_{33}(cc^*)^2 + 2U_{12}aa^*bb^*\cos\gamma + 2U_{13}aa^*cc^*\cos\beta + 2U_{23}bb^*cc^*\cos\alpha]$

**Table 3. Positional Parameters for Hydrogens in Compound 1373**

| Atom | x      | y       | z      | $U_{iso}, \text{Å}^2$ |
|------|--------|---------|--------|-----------------------|
| H2   | 0.4772 | 0.5204  | 0.4410 | 0.038                 |
| H3   | 0.5765 | 0.5279  | 0.3843 | 0.044                 |
| H4   | 0.7581 | 0.2763  | 0.3610 | 0.043                 |
| H5   | 0.8427 | -0.0144 | 0.3969 | 0.040                 |
| H6   | 0.7424 | -0.0275 | 0.4531 | 0.039                 |
| H7a  | 0.4026 | 0.2710  | 0.4915 | 0.031                 |
| H7b  | 0.5265 | 0.0753  | 0.4983 | 0.031                 |
| H8   | 0.6302 | 0.4981  | 0.5121 | 0.037                 |
| H1   | 0.6967 | 0.2081  | 0.5956 | 0.030                 |
| H2'  | 0.5069 | 0.0001  | 0.7621 | 0.062                 |
| H3'  | 0.4065 | -0.0365 | 0.8204 | 0.068                 |
| H4'  | 0.2229 | 0.2396  | 0.8428 | 0.060                 |
| H5'  | 0.1188 | 0.4872  | 0.8084 | 0.060                 |
| H6'  | 0.2294 | 0.5303  | 0.7507 | 0.047                 |
| H7a' | 0.5694 | 0.2510  | 0.7119 | 0.040                 |
| H7b' | 0.4306 | 0.4356  | 0.7072 | 0.040                 |
| H8'  | 0.3379 | 0.0081  | 0.6946 | 0.021                 |
| H1'  | 0.2659 | 0.2667  | 0.6089 | 0.020                 |

**Table 4. Refined Thermal Parameters (U's) for Compound 1373**

| Atom | U <sub>11</sub> | U <sub>22</sub> | U <sub>33</sub> | U <sub>23</sub> | U <sub>13</sub> | U <sub>12</sub> |
|------|-----------------|-----------------|-----------------|-----------------|-----------------|-----------------|
| C1   | 0.014(3)        | 0.020(4)        | 0.036(4)        | 0.004(3)        | -0.010(3)       | -0.007(3)       |
| C2   | 0.020(4)        | 0.021(4)        | 0.044(4)        | 0.005(3)        | -0.004(3)       | 0.004(3)        |
| C3   | 0.024(4)        | 0.028(4)        | 0.046(5)        | 0.020(4)        | 0.004(3)        | 0.001(3)        |
| C4   | 0.020(4)        | 0.044(5)        | 0.033(5)        | 0.009(4)        | -0.003(3)       | 0.004(3)        |
| C5   | 0.021(4)        | 0.032(4)        | 0.038(5)        | -0.007(3)       | -0.009(3)       | 0.007(3)        |
| C6   | 0.020(4)        | 0.035(4)        | 0.033(4)        | 0.006(4)        | -0.013(3)       | 0.007(3)        |
| C7   | 0.011(3)        | 0.021(4)        | 0.039(4)        | -0.002(3)       | -0.005(3)       | -0.005(3)       |
| C8   | 0.015(3)        | 0.032(4)        | 0.036(3)        | -0.001(3)       | 0.000(3)        | 0.004(3)        |
| C9   | 0.0178(16)      | 0.0187(17)      | 0.0200(17)      | -0.0001(10)     | 0.0003(9)       | -0.0001(10)     |
| C10  | 0.0203(16)      | 0.0205(17)      | 0.0212(17)      | -0.0002(10)     | 0.0014(9)       | -0.0017(9)      |
| N1   | 0.014(3)        | 0.020(3)        | 0.035(3)        | 0.003(3)        | 0.000(2)        | -0.001(2)       |
| O1   | 0.0070(19)      | 0.023(3)        | 0.036(3)        | 0.001(2)        | 0.001(2)        | -0.006(2)       |
| O2   | 0.0145(15)      | 0.0220(18)      | 0.0250(17)      | 0.0022(16)      | -0.0018(14)     | 0.0030(15)      |
| O3   | 0.0140(12)      | 0.0172(13)      | 0.0180(12)      | -0.0005(9)      | 0.0007(9)       | 0.0008(9)       |
| C1'  | 0.028(4)        | 0.064(6)        | 0.017(3)        | -0.002(4)       | 0.002(3)        | 0.004(4)        |
| C2'  | 0.031(4)        | 0.078(7)        | 0.032(4)        | 0.005(4)        | 0.005(4)        | 0.015(5)        |
| C3'  | 0.039(5)        | 0.085(7)        | 0.030(5)        | 0.012(5)        | 0.001(4)        | 0.001(5)        |
| C4'  | 0.025(4)        | 0.092(7)        | 0.018(4)        | -0.011(4)       | 0.003(3)        | -0.020(4)       |
| C5'  | 0.032(4)        | 0.084(7)        | 0.020(4)        | -0.015(4)       | 0.001(3)        | -0.002(4)       |
| C6'  | 0.019(4)        | 0.063(6)        | 0.024(4)        | -0.008(4)       | 0.002(3)        | 0.008(4)        |
| C7'  | 0.011(3)        | 0.055(6)        | 0.025(3)        | -0.002(4)       | 0.006(3)        | 0.008(3)        |
| C8'  | 0.0147(15)      | 0.0155(16)      | 0.0172(15)      | 0.0006(10)      | 0.0008(9)       | 0.0010(9)       |
| C9'  | 0.017(3)        | 0.015(3)        | 0.036(4)        | -0.005(3)       | 0.000(3)        | -0.003(3)       |
| C10' | 0.0173(16)      | 0.0169(16)      | 0.0196(16)      | 0.0000(9)       | 0.0002(9)       | 0.0009(9)       |
| N1'  | 0.0143(14)      | 0.0144(15)      | 0.0157(14)      | -0.0003(9)      | 0.0007(9)       | -0.0014(9)      |
| O1'  | 0.0144(16)      | 0.0222(18)      | 0.0239(18)      | -0.0007(16)     | 0.0026(14)      | 0.0030(14)      |
| O2'  | 0.011(2)        | 0.036(3)        | 0.049(3)        | -0.002(3)       | -0.001(2)       | 0.006(2)        |
| O3'  | 0.007(2)        | 0.028(3)        | 0.037(3)        | -0.003(2)       | 0.003(2)        | 0.000(2)        |

The form of the anisotropic displacement parameter is:  
 $\exp[-2\pi(a^2U_{11}h^2+b^2U_{22}k^2+c^2U_{33}l^2+2b^*c^*U_{23}kl+2a^*c^*U_{13}hl+2a^*b^*U_{12}hk)]$

**Table 5. Bond Distances in Compound 1373, Å**

|          |           |          |           |          |           |
|----------|-----------|----------|-----------|----------|-----------|
| C1-C6    | 1.361(12) | C1-C2    | 1.435(12) | C1-C7    | 1.531(12) |
| C2-C3    | 1.367(13) | C3-C4    | 1.353(14) | C4-C5    | 1.425(13) |
| C5-C6    | 1.357(14) | C7-C8    | 1.514(11) | C8-O3    | 1.440(8)  |
| C8-C9    | 1.488(12) | C9-O1    | 1.233(9)  | C9-N1    | 1.368(10) |
| C10-O2   | 1.163(9)  | C10-N1   | 1.382(10) | C10-O3   | 1.401(9)  |
| C1'-C2'  | 1.324(15) | C1'-C6'  | 1.405(13) | C1'-C7'  | 1.506(12) |
| C2'-C3'  | 1.421(14) | C3'-C4'  | 1.423(17) | C4'-C5'  | 1.284(16) |
| C5'-C6'  | 1.432(13) | C7'-C8'  | 1.508(11) | C8'-O3'  | 1.492(8)  |
| C8'-C9'  | 1.540(11) | C9'-O1'  | 1.210(9)  | C9'-N1'  | 1.331(10) |
| C10'-O2' | 1.267(9)  | C10'-O3' | 1.302(10) | C10'-N1' | 1.389(10) |

**Table 6. Bond Angles in Compound 1373, °**

|              |           |              |           |              |           |
|--------------|-----------|--------------|-----------|--------------|-----------|
| C6-C1-C2     | 117.9(8)  | C6-C1-C7     | 123.0(8)  | C2-C1-C7     | 119.2(8)  |
| C3-C2-C1     | 117.4(8)  | C4-C3-C2     | 124.6(9)  | C3-C4-C5     | 117.5(10) |
| C6-C5-C4     | 118.7(9)  | C5-C6-C1     | 123.8(9)  | C8-C7-C1     | 115.2(6)  |
| O3-C8-C9     | 103.5(6)  | O3-C8-C7     | 111.2(7)  | C9-C8-C7     | 110.2(7)  |
| O1-C9-N1     | 126.9(7)  | O1-C9-C8     | 125.5(7)  | N1-C9-C8     | 107.7(6)  |
| O2-C10-N1    | 129.9(8)  | O2-C10-O3    | 122.6(7)  | N1-C10-O3    | 107.5(6)  |
| C9-N1-C10    | 111.3(7)  | C10-O3-C8    | 109.8(6)  | C2'-C1'-C6'  | 119.0(9)  |
| C2'-C1'-C7'  | 124.5(9)  | C6'-C1'-C7'  | 116.4(9)  | C1'-C2'-C3'  | 124.0(10) |
| C2'-C3'-C4'  | 115.1(11) | C5'-C4'-C3'  | 121.9(10) | C4'-C5'-C6'  | 122.2(10) |
| C1'-C6'-C5'  | 117.6(10) | C1'-C7'-C8'  | 113.0(8)  | O3'-C8'-C7'  | 110.2(6)  |
| O3'-C8'-C9'  | 102.1(6)  | C7'-C8'-C9'  | 112.4(6)  | O1'-C9'-N1'  | 129.8(8)  |
| O1'-C9'-C8'  | 124.3(7)  | N1'-C9'-C8'  | 105.9(6)  | O2'-C10'-O3' | 121.0(7)  |
| O2'-C10'-N1' | 127.2(7)  | O3'-C10'-N1' | 111.7(6)  | C9'-N1'-C10' | 111.5(7)  |
| C10'-O3'-C8' | 108.5(5)  |              |           |              |           |



---

<sup>i</sup>Bruker (2009) SAINT. Bruker AXS Inc., Madison, Wisconsin, USA.

<sup>ii</sup>Bruker (2009) SHELXTL. Bruker AXS Inc., Madison, Wisconsin, USA.

<sup>iii</sup>Sheldrick, G.M. (2007) SADABS. University of Gottingen, Germany.

<sup>iv</sup>Sheldrick, G.M. (2008) Acta Cryst. A64,112-122.

<sup>v</sup>Sheldrick, G.M. (2008) Acta Cryst. A64,112-122.

<sup>vi</sup> $R1 = \sum |F_o| - |F_c| / \sum |F_o|$

$wR2 = [\sum w(F_o^2 - F_c^2)^2 / \sum w(F_o^2)]^{1/2}$

$GOF = [\sum w(F_o^2 - F_c^2)^2 / (n - p)]^{1/2}$

where n = the number of reflections and p = the number of parameters refined.

<sup>vii</sup>“ORTEP-II: A Fortran Thermal Ellipsoid Plot Program for Crystal Structure Illustrations”. C.K. Johnson (1976) ORNL-5138.

### X-ray Structure Determination of Compound 1369 (i.e., compound 19; CCDC 1428038)

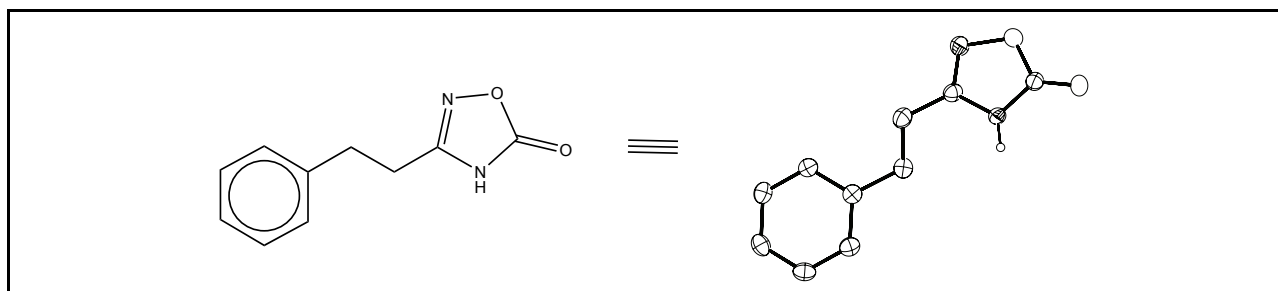

Compound 1369,  $C_{10}H_{10}N_2O_2$ , crystallizes in the monoclinic space group  $P2_1/n$  (systematic absences  $0k0$ :  $k=\text{odd}$  and  $h0l$ :  $h+l=\text{odd}$ ) with  $a=7.9823(4)\text{\AA}$ ,  $b=5.9450(3)\text{\AA}$ ,  $c=38.598(2)\text{\AA}$ ,  $\beta=91.058(3)^\circ$ ,  $V=1831.35(16)\text{\AA}^3$ ,  $Z=8$ , and  $d_{\text{calc}}=1.380\text{ g/cm}^3$ . X-ray intensity data were collected on a Bruker APEXII CCD area detector employing graphite-monochromated Mo- $K\alpha$  radiation ( $\lambda=0.71073\text{ \AA}$ ) at a temperature of  $100(1)\text{K}$ . Preliminary indexing was performed from a series of thirty-six  $0.5^\circ$  rotation frames with exposures of 10 seconds. A total of 3244 frames were collected with a crystal to detector distance of 79.8 mm, rotation widths of  $0.5^\circ$  and exposures of 20 seconds:

| scan type | $2\theta$ | $\omega$ | $\phi$ | $\chi$ | frames |
|-----------|-----------|----------|--------|--------|--------|
| $\phi$    | 39.50     | 355.75   | 347.00 | -30.00 | 739    |
| $\omega$  | -23.00    | 303.71   | 117.92 | -48.25 | 346    |
| $\omega$  | -30.50    | 29.67    | 15.80  | -60.33 | 200    |
| $\phi$    | -35.50    | 205.24   | 89.28  | 23.24  | 576    |
| $\omega$  | 17.00     | 322.28   | 227.71 | 72.15  | 112    |
| $\omega$  | 29.50     | 97.30    | 147.59 | -39.24 | 142    |
| $\omega$  | 39.50     | 104.83   | 178.30 | -60.33 | 161    |
| $\omega$  | 39.50     | 332.96   | 301.50 | 47.18  | 201    |
| $\phi$    | 29.50     | 49.84    | 268.29 | 41.79  | 232    |
| $\omega$  | 32.00     | 249.79   | 81.50  | 47.18  | 285    |
| $\phi$    | -28.00    | 351.96   | 197.71 | -24.38 | 250    |

Rotation frames were integrated using SAINT<sup>i</sup>, producing a listing of unaveraged  $F^2$  and  $\sigma(F^2)$  values which were then passed to the SHELXTL<sup>ii</sup> program package for further processing and structure solution. A total of 23805 reflections were measured over the ranges  $2.11 \leq \theta \leq 25.37^\circ$ ,  $-9 \leq h \leq 9$ ,  $-7 \leq k \leq 7$ ,  $-46 \leq l \leq 46$  yielding 3333 unique reflections ( $R_{\text{int}} = 0.0581$ ). The intensity data were corrected for Lorentz and polarization effects and for absorption using SADABS<sup>iii</sup> (minimum and maximum transmission 0.5306, 0.7452).

The structure was solved by direct methods (SHELXS-97<sup>iv</sup>). The asymmetric unit consists of two crystallographically-independent molecules. Refinement was by full-matrix least squares based on  $F^2$  using SHELXL-97.<sup>v</sup> All reflections were used during refinement. The weighting scheme used was  $w=1/[\sigma^2(F_o^2) + (0.0068P)^2 + 2.4019P]$  where  $P = (F_o^2 + 2F_c^2)/3$ . Non-hydrogen atoms were refined anisotropically and hydrogen atoms were refined using a riding model. Refinement converged to  $R1=0.0560$  and  $wR2=0.1183$  for 2887 observed reflections for which  $F > 4\sigma(F)$  and  $R1=0.0650$  and  $wR2=0.1218$  and  $GOF = 1.206$  for all 3333 unique, non-zero reflections and 254 variables.<sup>vi</sup> The maximum  $\Delta/\sigma$  in the final cycle of least squares was 0.001 and the two most prominent peaks in the final difference Fourier were  $+0.407$  and  $-0.258 e/\text{\AA}^3$ .

Table 1. lists cell information, data collection parameters, and refinement data. Final positional and equivalent isotropic thermal parameters are given in Tables 2. and 3. Anisotropic thermal parameters are in Table 4. Tables 5. and 6. list bond distances and bond angles. Figure 1. is an ORTEP<sup>vii</sup> representation of the two molecules in the asymmetric unit with 50% probability thermal ellipsoids displayed.

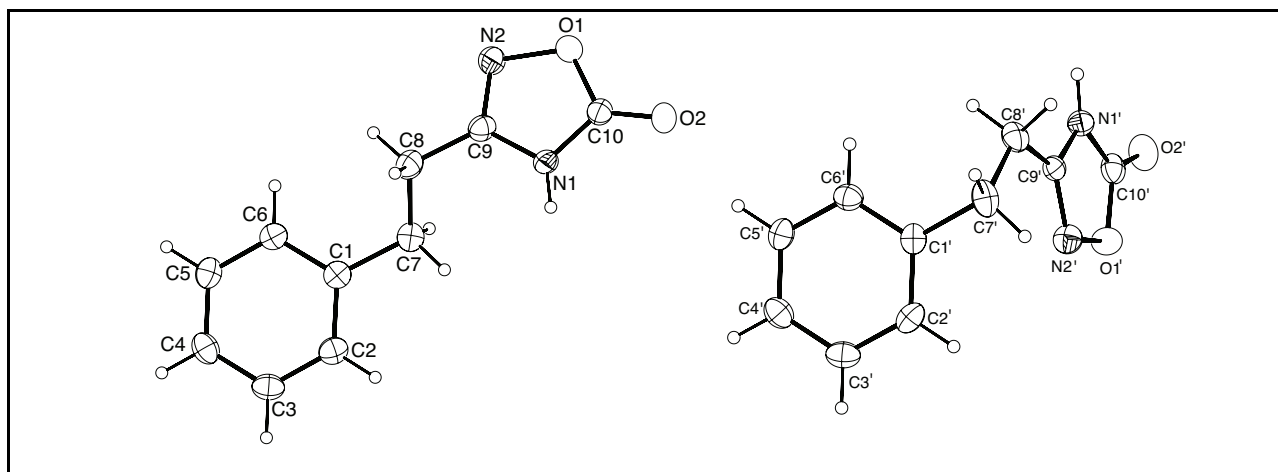

Figure 1. ORTEP drawings of the two molecules in the asymmetric unit with 50% probability thermal ellipsoids.

The two molecules in the asymmetric unit form a hydrogen bonded tetramer (see Fig. 2).

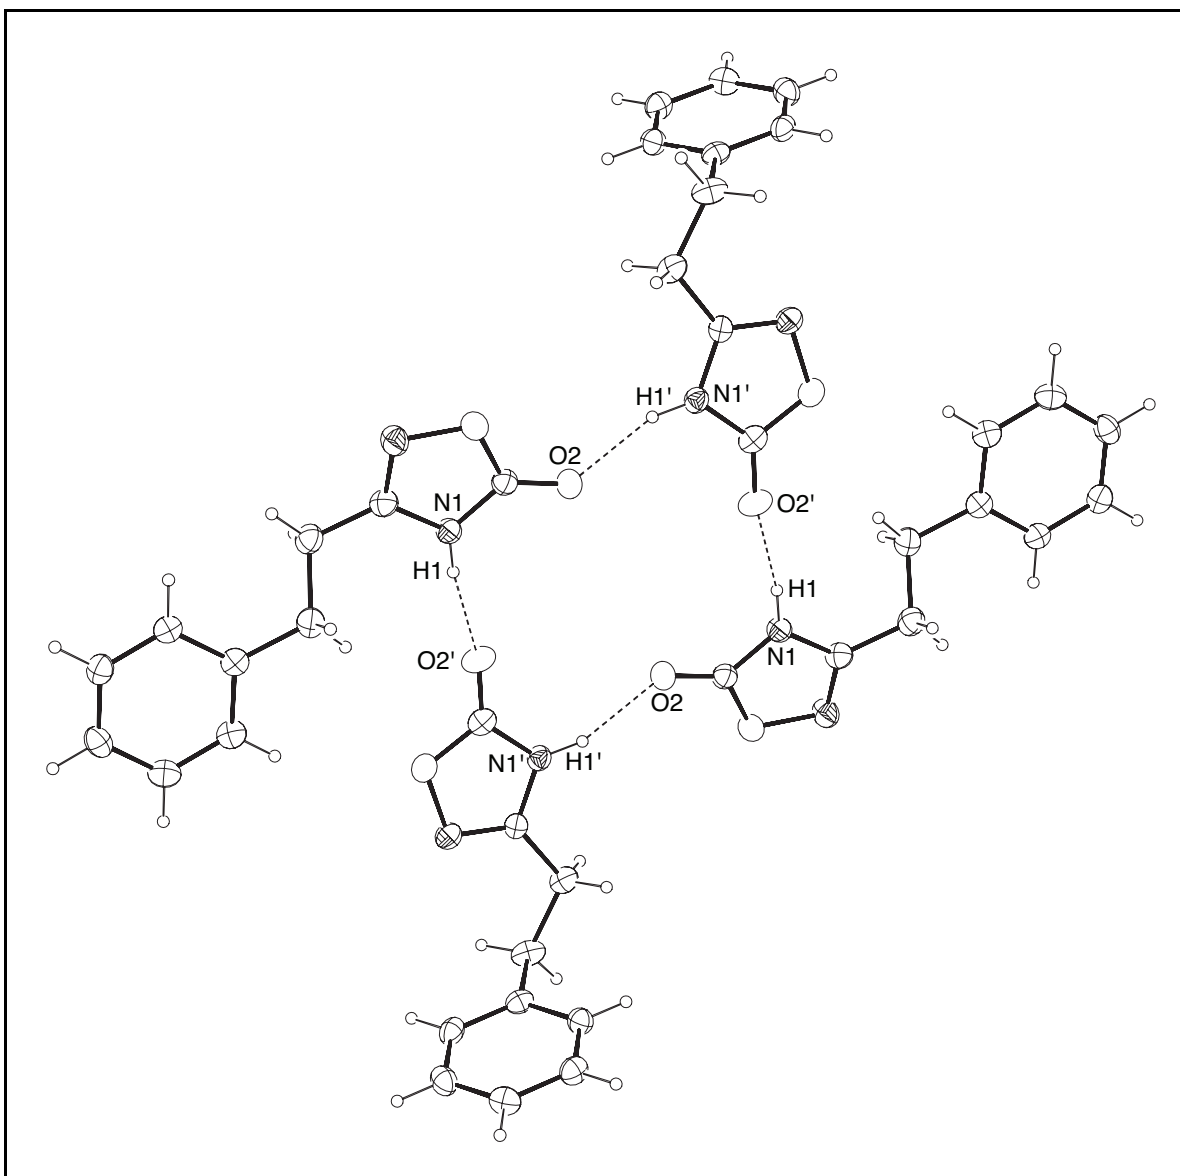

Figure 2. ORTEP drawing of the hydrogen bonding.

Table 1. lists the hydrogen bonding parameters (“D” is the donor atom; “A” is the acceptor atom).

| D   | A   | H...D | A...D | $\angle$ D-H...A |
|-----|-----|-------|-------|------------------|
| N1  | O2' | 1.91  | 2.76  | 171.2            |
| N1' | O2  | 1.92  | 2.76  | 161.8            |

**Table 1. Summary of Structure Determination of Compound 1369**

|                                   |                                                               |
|-----------------------------------|---------------------------------------------------------------|
| Empirical formula                 | C <sub>10</sub> H <sub>10</sub> N <sub>2</sub> O <sub>2</sub> |
| Formula weight                    | 190.20                                                        |
| Temperature                       | 100(1) K                                                      |
| Wavelength                        | 0.71073 Å                                                     |
| Crystal system                    | monoclinic                                                    |
| Space group                       | P2 <sub>1</sub> /n                                            |
| Cell constants:                   |                                                               |
| a                                 | 7.9823(4) Å                                                   |
| b                                 | 5.9450(3) Å                                                   |
| c                                 | 38.598(2) Å                                                   |
| β                                 | 91.058(3)°                                                    |
| Volume                            | 1831.35(16) Å <sup>3</sup>                                    |
| Z                                 | 8                                                             |
| Density (calculated)              | 1.380 Mg/m <sup>3</sup>                                       |
| Absorption coefficient            | 0.098 mm <sup>-1</sup>                                        |
| F(000)                            | 800                                                           |
| Crystal size                      | 0.25 x 0.20 x 0.03 mm <sup>3</sup>                            |
| Theta range for data collection   | 2.11 to 25.37°                                                |
| Index ranges                      | -9 ≤ h ≤ 9, -7 ≤ k ≤ 7, -46 ≤ l ≤ 46                          |
| Reflections collected             | 23805                                                         |
| Independent reflections           | 3333 [R(int) = 0.0581]                                        |
| Completeness to theta = 25.37°    | 99.5 %                                                        |
| Absorption correction             | Semi-empirical from equivalents                               |
| Max. and min. transmission        | 0.7452 and 0.5306                                             |
| Refinement method                 | Full-matrix least-squares on F <sup>2</sup>                   |
| Data / restraints / parameters    | 3333 / 0 / 254                                                |
| Goodness-of-fit on F <sup>2</sup> | 1.206                                                         |
| Final R indices [I > 2σ(I)]       | R1 = 0.0560, wR2 = 0.1183                                     |
| R indices (all data)              | R1 = 0.0650, wR2 = 0.1218                                     |
| Largest diff. peak and hole       | 0.407 and -0.258 e.Å <sup>-3</sup>                            |

**Table 2. Refined Positional Parameters for Compound 1369**

| Atom | x         | y          | z          | $U_{eq}, \text{Å}^2$ |
|------|-----------|------------|------------|----------------------|
| C1   | 0.7902(3) | 0.9573(4)  | 0.40116(6) | 0.0240(5)            |
| C2   | 0.7096(3) | 0.9073(4)  | 0.36968(6) | 0.0257(5)            |
| C3   | 0.7168(3) | 1.0545(5)  | 0.34212(6) | 0.0282(6)            |
| C4   | 0.8028(3) | 1.2547(5)  | 0.34541(6) | 0.0285(6)            |
| C5   | 0.8819(3) | 1.3073(4)  | 0.37656(6) | 0.0266(6)            |
| C6   | 0.8751(3) | 1.1610(4)  | 0.40422(6) | 0.0258(5)            |
| C7   | 0.7926(3) | 0.7846(4)  | 0.42994(6) | 0.0297(6)            |
| C8   | 0.7734(3) | 0.8806(4)  | 0.46617(6) | 0.0287(6)            |
| C9   | 0.7897(3) | 0.7037(4)  | 0.49325(6) | 0.0251(5)            |
| C10  | 0.7400(3) | 0.3924(4)  | 0.52199(6) | 0.0239(5)            |
| N1   | 0.7032(2) | 0.5057(3)  | 0.49255(5) | 0.0233(5)            |
| N2   | 0.8861(3) | 0.7208(4)  | 0.52034(5) | 0.0293(5)            |
| O1   | 0.8550(2) | 0.5172(3)  | 0.53962(4) | 0.0271(4)            |
| O2   | 0.6862(2) | 0.2151(3)  | 0.53236(4) | 0.0346(5)            |
| C1'  | 0.6895(3) | 0.1424(4)  | 0.70174(6) | 0.0224(5)            |
| C2'  | 0.6397(3) | -0.0174(4) | 0.72552(6) | 0.0254(5)            |
| C3'  | 0.5081(3) | 0.0263(5)  | 0.74769(6) | 0.0284(6)            |
| C4'  | 0.4250(3) | 0.2293(5)  | 0.74602(6) | 0.0276(6)            |
| C5'  | 0.4732(3) | 0.3891(4)  | 0.72234(6) | 0.0266(6)            |
| C6'  | 0.6051(3) | 0.3463(4)  | 0.70027(6) | 0.0248(5)            |
| C7'  | 0.8391(3) | 0.1015(5)  | 0.67895(6) | 0.0295(6)            |
| C8'  | 0.8049(3) | 0.1316(4)  | 0.64002(6) | 0.0259(6)            |
| C9'  | 0.7100(3) | -0.0570(4) | 0.62375(6) | 0.0198(5)            |
| C10' | 0.5762(3) | -0.2503(4) | 0.58335(6) | 0.0242(5)            |
| N1'  | 0.6571(2) | -0.0560(3) | 0.58981(5) | 0.0220(4)            |
| N2'  | 0.6686(2) | -0.2387(4) | 0.63933(5) | 0.0256(5)            |
| O1'  | 0.5805(2) | -0.3695(3) | 0.61321(4) | 0.0274(4)            |
| O2'  | 0.5095(2) | -0.3176(3) | 0.55678(4) | 0.0307(4)            |

$U_{eq} = \frac{1}{3}[U_{11}(aa^*)^2 + U_{22}(bb^*)^2 + U_{33}(cc^*)^2 + 2U_{12}aa^*bb^*\cos\gamma + 2U_{13}aa^*cc^*\cos\beta + 2U_{23}bb^*cc^*\cos\alpha]$

**Table 3. Positional Parameters for Hydrogens in Compound 1369**

| Atom | x      | y       | z      | $U_{iso}, \text{Å}^2$ |
|------|--------|---------|--------|-----------------------|
| H2   | 0.6505 | 0.7733  | 0.3673 | 0.034                 |
| H3   | 0.6634 | 1.0185  | 0.3212 | 0.037                 |
| H4   | 0.8075 | 1.3539  | 0.3268 | 0.038                 |
| H5   | 0.9401 | 1.4422  | 0.3789 | 0.035                 |
| H6   | 0.9278 | 1.1988  | 0.4251 | 0.034                 |
| H7a  | 0.8975 | 0.7026  | 0.4292 | 0.039                 |
| H7b  | 0.7028 | 0.6777  | 0.4256 | 0.039                 |
| H8a  | 0.8583 | 0.9948  | 0.4702 | 0.038                 |
| H8b  | 0.6645 | 0.9518  | 0.4678 | 0.038                 |
| H1   | 0.6367 | 0.4610  | 0.4762 | 0.031                 |
| H2'  | 0.6946 | -0.1552 | 0.7267 | 0.034                 |
| H3'  | 0.4762 | -0.0818 | 0.7637 | 0.038                 |
| H4'  | 0.3368 | 0.2583  | 0.7608 | 0.037                 |
| H5'  | 0.4172 | 0.5262  | 0.7211 | 0.035                 |
| H6'  | 0.6370 | 0.4552  | 0.6844 | 0.033                 |
| H7a' | 0.8791 | -0.0505 | 0.6830 | 0.039                 |
| H7b' | 0.9281 | 0.2037  | 0.6860 | 0.039                 |
| H8a' | 0.7424 | 0.2698  | 0.6364 | 0.034                 |
| H8b' | 0.9111 | 0.1474  | 0.6284 | 0.034                 |
| H1'  | 0.6730 | 0.0505  | 0.5752 | 0.029                 |

**Table 4. Refined Thermal Parameters (U's) for Compound 1369**

| Atom | U <sub>11</sub> | U <sub>22</sub> | U <sub>33</sub> | U <sub>23</sub> | U <sub>13</sub> | U <sub>12</sub> |
|------|-----------------|-----------------|-----------------|-----------------|-----------------|-----------------|
| C1   | 0.0200(12)      | 0.0257(13)      | 0.0263(12)      | -0.0009(10)     | 0.0021(9)       | 0.0015(10)      |
| C2   | 0.0183(12)      | 0.0298(14)      | 0.0290(12)      | -0.0019(11)     | 0.0006(9)       | -0.0026(11)     |
| C3   | 0.0213(12)      | 0.0369(16)      | 0.0262(12)      | -0.0030(11)     | -0.0021(10)     | 0.0011(11)      |
| C4   | 0.0275(13)      | 0.0311(15)      | 0.0272(12)      | 0.0060(11)      | 0.0055(10)      | 0.0035(12)      |
| C5   | 0.0244(13)      | 0.0240(13)      | 0.0316(13)      | -0.0002(11)     | 0.0062(10)      | -0.0007(11)     |
| C6   | 0.0257(13)      | 0.0257(14)      | 0.0261(12)      | -0.0022(10)     | -0.0003(10)     | -0.0002(11)     |
| C7   | 0.0325(14)      | 0.0261(14)      | 0.0303(13)      | 0.0013(11)      | -0.0007(11)     | -0.0015(12)     |
| C8   | 0.0282(13)      | 0.0261(14)      | 0.0317(13)      | -0.0004(11)     | 0.0015(10)      | -0.0045(11)     |
| C9   | 0.0217(12)      | 0.0276(14)      | 0.0261(12)      | -0.0016(10)     | 0.0010(10)      | -0.0047(11)     |
| C10  | 0.0255(13)      | 0.0228(13)      | 0.0234(12)      | -0.0008(10)     | 0.0026(10)      | -0.0012(11)     |
| N1   | 0.0233(10)      | 0.0241(11)      | 0.0224(10)      | 0.0008(8)       | -0.0021(8)      | -0.0069(9)      |
| N2   | 0.0280(11)      | 0.0306(13)      | 0.0292(11)      | 0.0046(9)       | -0.0022(9)      | -0.0097(10)     |
| O1   | 0.0269(9)       | 0.0281(10)      | 0.0262(8)       | 0.0029(7)       | -0.0028(7)      | -0.0027(8)      |
| O2   | 0.0510(12)      | 0.0247(10)      | 0.0281(9)       | 0.0035(8)       | 0.0017(8)       | -0.0067(9)      |
| C1'  | 0.0177(12)      | 0.0250(13)      | 0.0242(11)      | -0.0052(10)     | -0.0031(9)      | -0.0003(10)     |
| C2'  | 0.0266(13)      | 0.0196(13)      | 0.0297(12)      | -0.0012(10)     | -0.0077(10)     | 0.0018(11)      |
| C3'  | 0.0281(13)      | 0.0300(15)      | 0.0271(12)      | 0.0052(11)      | -0.0020(10)     | -0.0075(11)     |
| C4'  | 0.0204(12)      | 0.0357(15)      | 0.0268(12)      | -0.0010(11)     | 0.0022(10)      | -0.0017(11)     |
| C5'  | 0.0243(13)      | 0.0249(14)      | 0.0306(13)      | -0.0021(11)     | -0.0011(10)     | 0.0054(11)      |
| C6'  | 0.0254(13)      | 0.0248(13)      | 0.0243(12)      | 0.0009(10)      | 0.0003(10)      | -0.0040(11)     |
| C7'  | 0.0198(12)      | 0.0377(16)      | 0.0309(13)      | -0.0106(12)     | -0.0009(10)     | 0.0009(11)      |
| C8'  | 0.0204(12)      | 0.0279(14)      | 0.0296(12)      | -0.0048(11)     | 0.0060(10)      | -0.0064(11)     |
| C9'  | 0.0162(11)      | 0.0198(12)      | 0.0235(11)      | 0.0003(10)      | 0.0044(9)       | 0.0008(10)      |
| C10' | 0.0179(12)      | 0.0260(13)      | 0.0289(12)      | -0.0043(11)     | 0.0046(10)      | 0.0004(11)      |
| N1'  | 0.0219(10)      | 0.0204(11)      | 0.0239(10)      | -0.0003(8)      | 0.0022(8)       | -0.0027(9)      |
| N2'  | 0.0248(11)      | 0.0246(11)      | 0.0274(10)      | -0.0021(9)      | -0.0014(8)      | -0.0037(9)      |
| O1'  | 0.0281(9)       | 0.0237(9)       | 0.0303(9)       | -0.0004(7)      | 0.0015(7)       | -0.0077(8)      |
| O2'  | 0.0257(9)       | 0.0348(11)      | 0.0315(9)       | -0.0107(8)      | -0.0014(7)      | -0.0042(8)      |

The form of the anisotropic displacement parameter is:  
 $\exp[-2\pi(a^2U_{11}h^2+b^2U_{22}k^2+c^2U_{33}l^2+2b^*c^*U_{23}kl+2a^*c^*U_{13}hl+2a^*b^*U_{12}hk)]$

**Table 5. Bond Distances in Compound 1369, Å**

|          |          |          |          |          |          |
|----------|----------|----------|----------|----------|----------|
| C1-C6    | 1.392(3) | C1-C2    | 1.396(3) | C1-C7    | 1.513(3) |
| C2-C3    | 1.379(4) | C3-C4    | 1.379(4) | C4-C5    | 1.383(4) |
| C5-C6    | 1.379(3) | C7-C8    | 1.521(3) | C8-C9    | 1.487(3) |
| C9-N2    | 1.291(3) | C9-N1    | 1.364(3) | C10-O2   | 1.209(3) |
| C10-N1   | 1.349(3) | C10-O1   | 1.354(3) | N2-O1    | 1.445(3) |
| C1'-C2'  | 1.385(3) | C1'-C6'  | 1.387(3) | C1'-C7'  | 1.516(3) |
| C2'-C3'  | 1.391(3) | C3'-C4'  | 1.378(4) | C4'-C5'  | 1.378(4) |
| C5'-C6'  | 1.390(3) | C7'-C8'  | 1.533(3) | C8'-C9'  | 1.486(3) |
| C9'-N2'  | 1.282(3) | C9'-N1'  | 1.369(3) | C10'-O2' | 1.215(3) |
| C10'-N1' | 1.345(3) | C10'-O1' | 1.353(3) | N2'-O1'  | 1.446(3) |

**Table 6. Bond Angles in Compound 1369, °**

|              |            |              |            |              |            |
|--------------|------------|--------------|------------|--------------|------------|
| C6-C1-C2     | 118.4(2)   | C6-C1-C7     | 121.9(2)   | C2-C1-C7     | 119.6(2)   |
| C3-C2-C1     | 120.7(2)   | C4-C3-C2     | 120.3(2)   | C3-C4-C5     | 119.6(2)   |
| C6-C5-C4     | 120.4(2)   | C5-C6-C1     | 120.6(2)   | C1-C7-C8     | 114.9(2)   |
| C9-C8-C7     | 111.8(2)   | N2-C9-N1     | 112.2(2)   | N2-C9-C8     | 123.8(2)   |
| N1-C9-C8     | 124.0(2)   | O2-C10-N1    | 129.9(2)   | O2-C10-O1    | 123.6(2)   |
| N1-C10-O1    | 106.5(2)   | C10-N1-C9    | 108.2(2)   | C9-N2-O1     | 104.22(19) |
| C10-O1-N2    | 108.77(17) | C2'-C1'-C6'  | 118.8(2)   | C2'-C1'-C7'  | 120.9(2)   |
| C6'-C1'-C7'  | 120.2(2)   | C1'-C2'-C3'  | 120.6(2)   | C4'-C3'-C2'  | 120.2(2)   |
| C5'-C4'-C3'  | 119.6(2)   | C4'-C5'-C6'  | 120.3(2)   | C1'-C6'-C5'  | 120.5(2)   |
| C1'-C7'-C8'  | 115.0(2)   | C9'-C8'-C7'  | 114.0(2)   | N2'-C9'-N1'  | 112.0(2)   |
| N2'-C9'-C8'  | 124.8(2)   | N1'-C9'-C8'  | 123.1(2)   | O2'-C10'-N1' | 129.9(2)   |
| O2'-C10'-O1' | 123.4(2)   | N1'-C10'-O1' | 106.7(2)   | C10'-N1'-C9' | 108.2(2)   |
| C9'-N2'-O1'  | 104.63(18) | C10'-O1'-N2' | 108.45(18) |              |            |



---

<sup>i</sup>Bruker (2009) SAINT. Bruker AXS Inc., Madison, Wisconsin, USA.

<sup>ii</sup>Bruker (2009) SHELXTL. Bruker AXS Inc., Madison, Wisconsin, USA.

<sup>iii</sup>Sheldrick, G.M. (2007) SADABS. University of Gottingen, Germany.

<sup>iv</sup>Sheldrick, G.M. (2008) Acta Cryst. A64,112-122.

<sup>v</sup>Sheldrick, G.M. (2008) Acta Cryst. A64,112-122.

<sup>vi</sup> $R1 = \sum |F_o| - |F_c| / \sum |F_o|$

$wR2 = [\sum w(F_o^2 - F_c^2)^2 / \sum w(F_o^2)]^{1/2}$

$GOF = [\sum w(F_o^2 - F_c^2)^2 / (n - p)]^{1/2}$

where n = the number of reflections and p = the number of parameters refined.

<sup>vii</sup>“ORTEP-II: A Fortran Thermal Ellipsoid Plot Program for Crystal Structure Illustrations”. C.K. Johnson (1976) ORNL-5138.

### X-ray Structure Determination of Compound 1361 (i.e., compound 20; CCDC 1428058)

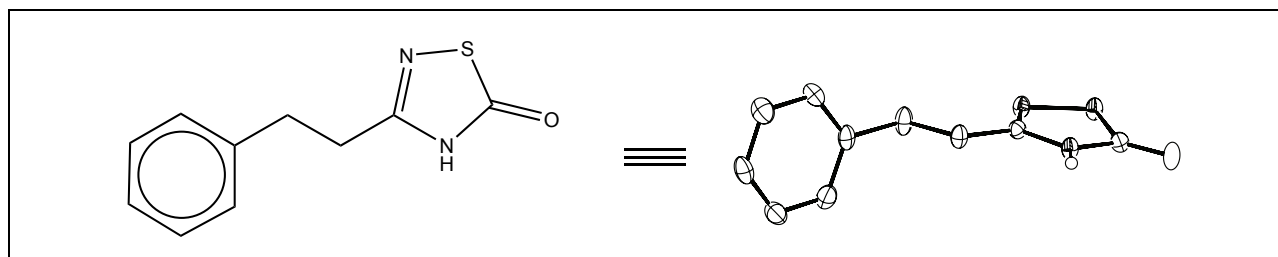

Compound 1361,  $C_{10}H_{10}N_2SO$ , crystallizes in the monoclinic space group  $P2_1/c$  (systematic absences  $0k0$ :  $k=\text{odd}$  and  $h0l$ :  $l=\text{odd}$ ) with  $a=5.3809(3)\text{\AA}$ ,  $b=9.0367(5)\text{\AA}$ ,  $c=20.1528(10)\text{\AA}$ ,  $\beta=91.122(2)^\circ$ ,  $V=979.75(9)\text{\AA}^3$ ,  $Z=4$ , and  $d_{\text{calc}}=1.398\text{ g/cm}^3$ . X-ray intensity data were collected on a Bruker APEXII CCD area detector employing graphite-monochromated Mo- $K\alpha$  radiation ( $\lambda=0.71073\text{ \AA}$ ) at a temperature of  $100(1)\text{K}$ . Preliminary indexing was performed from a series of thirty-six  $0.5^\circ$  rotation frames with exposures of 10 seconds. A total of 2190 frames were collected with a crystal to detector distance of 37.5 mm, rotation widths of  $0.5^\circ$  and exposures of 5 seconds:

| scan type | $2\theta$ | $\omega$ | $\phi$ | $\chi$ | frames |
|-----------|-----------|----------|--------|--------|--------|
| $\phi$    | 19.50     | 59.55    | 355.29 | -26.26 | 722    |
| $\omega$  | -15.50    | 280.02   | 18.69  | 41.79  | 131    |
| $\omega$  | -20.50    | 332.84   | 178.64 | -31.86 | 62     |
| $\phi$    | -15.50    | 258.48   | 8.28   | 19.46  | 554    |
| $\phi$    | -20.50    | 342.55   | 324.79 | -73.06 | 721    |

Rotation frames were integrated using SAINT<sup>i</sup>, producing a listing of unaveraged  $F^2$  and  $\sigma(F^2)$  values which were then passed to the SHELXTL<sup>ii</sup> program package for further processing and structure solution. A total of 18360 reflections were measured over the ranges  $2.02 \leq \theta \leq 25.37^\circ$ ,  $-6 \leq h \leq 6$ ,  $-10 \leq k \leq 10$ ,  $-24 \leq l \leq 24$  yielding 1795 unique reflections ( $R_{\text{int}} = 0.0203$ ). The intensity data were corrected for Lorentz and polarization effects and for absorption using SADABS<sup>iii</sup> (minimum and maximum transmission 0.6929, 0.7452).

The structure was solved by direct methods (SHELXS-97<sup>iv</sup>). Refinement was by full-matrix least squares based on  $F^2$  using SHELXL-97.<sup>v</sup> All reflections were used during refinement. The weighting scheme used was  $w=1/[\sigma^2(F_o^2) + (0.0579P)^2 + 0.3022P]$  where  $P = (F_o^2 + 2F_c^2)/3$ . Non-hydrogen atoms

were refined anisotropically and hydrogen atoms were refined using a riding model. Refinement converged to  $R1=0.0263$  and  $wR2=0.0830$  for 1744 observed reflections for which  $F > 4\sigma(F)$  and  $R1=0.0302$  and  $wR2=0.0976$  and  $GOF = 1.228$  for all 1795 unique, non-zero reflections and 128 variables.<sup>vi</sup> The maximum  $\Delta/\sigma$  in the final cycle of least squares was 0.001 and the two most prominent peaks in the final difference Fourier were  $+0.448$  and  $-0.477 \text{ e}/\text{\AA}^3$ .

Table 1. lists cell information, data collection parameters, and refinement data. Final positional and equivalent isotropic thermal parameters are given in Tables 2. and 3. Anisotropic thermal parameters are in Table 4. Tables 5. and 6. list bond distances and bond angles. Figure 1. is an ORTEP<sup>vii</sup> representation of the molecule with 50% probability thermal ellipsoids displayed.

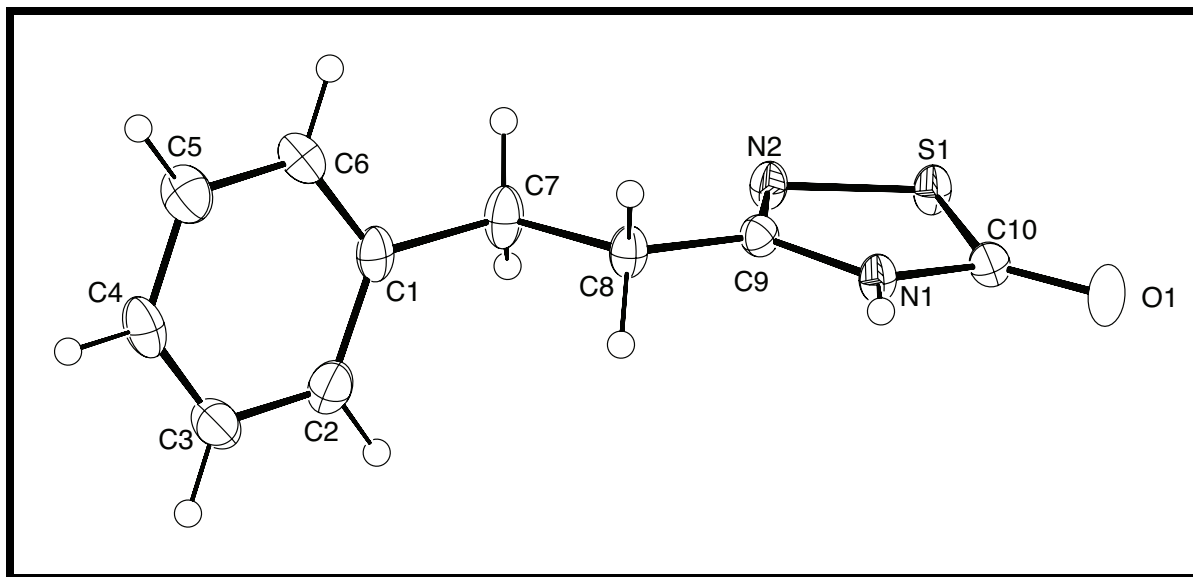

Figure 1. ORTEP drawing of the title compound with 50% probability thermal ellipsoids.

**Table 1. Summary of Structure Determination of Compound 1361**

|                                   |                                                   |
|-----------------------------------|---------------------------------------------------|
| Empirical formula                 | C <sub>10</sub> H <sub>10</sub> N <sub>2</sub> SO |
| Formula weight                    | 206.26                                            |
| Temperature                       | 100(1) K                                          |
| Wavelength                        | 0.71073 Å                                         |
| Crystal system                    | monoclinic                                        |
| Space group                       | P2 <sub>1</sub> /c                                |
| Cell constants:                   |                                                   |
| a                                 | 5.3809(3) Å                                       |
| b                                 | 9.0367(5) Å                                       |
| c                                 | 20.1528(10) Å                                     |
| β                                 | 91.122(2)°                                        |
| Volume                            | 979.75(9) Å <sup>3</sup>                          |
| Z                                 | 4                                                 |
| Density (calculated)              | 1.398 Mg/m <sup>3</sup>                           |
| Absorption coefficient            | 0.296 mm <sup>-1</sup>                            |
| F(000)                            | 432                                               |
| Crystal size                      | 0.42 x 0.28 x 0.20 mm <sup>3</sup>                |
| Theta range for data collection   | 2.02 to 25.37°                                    |
| Index ranges                      | -6 ≤ h ≤ 6, -10 ≤ k ≤ 10, -24 ≤ l ≤ 24            |
| Reflections collected             | 18360                                             |
| Independent reflections           | 1795 [R(int) = 0.0203]                            |
| Completeness to theta = 25.37°    | 99.8 %                                            |
| Absorption correction             | Semi-empirical from equivalents                   |
| Max. and min. transmission        | 0.7452 and 0.6929                                 |
| Refinement method                 | Full-matrix least-squares on F <sup>2</sup>       |
| Data / restraints / parameters    | 1795 / 0 / 128                                    |
| Goodness-of-fit on F <sup>2</sup> | 1.228                                             |
| Final R indices [I > 2σ(I)]       | R1 = 0.0263, wR2 = 0.0830                         |
| R indices (all data)              | R1 = 0.0302, wR2 = 0.0976                         |
| Largest diff. peak and hole       | 0.448 and -0.477 e.Å <sup>-3</sup>                |

**Table 2. Refined Positional Parameters for Compound 1361**

| Atom | x           | y           | z            | $U_{eq}, \text{Å}^2$ |
|------|-------------|-------------|--------------|----------------------|
| C1   | 0.6107(3)   | 0.54807(16) | 0.70797(7)   | 0.0209(3)            |
| C2   | 0.5640(3)   | 0.47615(17) | 0.76743(8)   | 0.0286(4)            |
| C3   | 0.7151(3)   | 0.50017(19) | 0.82329(8)   | 0.0315(4)            |
| C4   | 0.9111(3)   | 0.59840(19) | 0.82067(7)   | 0.0280(4)            |
| C5   | 0.9566(3)   | 0.6725(2)   | 0.76223(8)   | 0.0293(4)            |
| C6   | 0.8073(3)   | 0.64687(18) | 0.70629(7)   | 0.0245(3)            |
| C7   | 0.4538(3)   | 0.51448(17) | 0.64660(8)   | 0.0256(3)            |
| C8   | 0.5395(3)   | 0.37144(16) | 0.61371(7)   | 0.0200(3)            |
| C9   | 0.3709(3)   | 0.32040(15) | 0.55818(7)   | 0.0168(3)            |
| C10  | 0.2397(3)   | 0.14688(16) | 0.48157(7)   | 0.0180(3)            |
| N1   | 0.4108(2)   | 0.18468(13) | 0.52958(6)   | 0.0178(3)            |
| N2   | 0.1832(2)   | 0.39609(13) | 0.53555(6)   | 0.0188(3)            |
| O1   | 0.23233(19) | 0.03232(11) | 0.44894(5)   | 0.0246(3)            |
| S1   | 0.03579(6)  | 0.29781(4)  | 0.475107(16) | 0.01868(16)          |

$U_{eq} = \frac{1}{3}[U_{11}(aa^*)^2 + U_{22}(bb^*)^2 + U_{33}(cc^*)^2 + 2U_{12}aa^*bb^*\cos\gamma + 2U_{13}aa^*cc^*\cos\beta + 2U_{23}bb^*cc^*\cos\alpha]$

**Table 3. Positional Parameters for Hydrogens in Compound 1361**

| Atom | x      | y      | z      | $U_{iso}, \text{Å}^2$ |
|------|--------|--------|--------|-----------------------|
| H2   | 0.4303 | 0.4113 | 0.7699 | 0.038                 |
| H3   | 0.6838 | 0.4498 | 0.8625 | 0.042                 |
| H4   | 1.0117 | 0.6146 | 0.8580 | 0.037                 |
| H5   | 1.0873 | 0.7396 | 0.7603 | 0.039                 |
| H6   | 0.8401 | 0.6969 | 0.6671 | 0.033                 |
| H7a  | 0.4663 | 0.5957 | 0.6154 | 0.034                 |
| H7b  | 0.2810 | 0.5050 | 0.6587 | 0.034                 |
| H8a  | 0.7049 | 0.3864 | 0.5966 | 0.027                 |
| H8b  | 0.5504 | 0.2942 | 0.6471 | 0.027                 |
| H1   | 0.5331 | 0.1283 | 0.5409 | 0.024                 |

**Table 4. Refined Thermal Parameters (U's) for Compound 1361**

| Atom | $U_{11}$   | $U_{22}$  | $U_{33}$  | $U_{23}$     | $U_{13}$     | $U_{12}$    |
|------|------------|-----------|-----------|--------------|--------------|-------------|
| C1   | 0.0218(7)  | 0.0188(7) | 0.0218(7) | -0.0075(5)   | -0.0033(5)   | 0.0084(5)   |
| C2   | 0.0336(8)  | 0.0224(8) | 0.0299(8) | -0.0054(6)   | 0.0017(6)    | -0.0037(6)  |
| C3   | 0.0476(10) | 0.0275(8) | 0.0194(8) | 0.0007(6)    | 0.0017(7)    | 0.0042(7)   |
| C4   | 0.0292(8)  | 0.0353(9) | 0.0190(7) | -0.0057(6)   | -0.0075(6)   | 0.0069(7)   |
| C5   | 0.0206(8)  | 0.0407(9) | 0.0266(8) | -0.0031(7)   | -0.0017(6)   | -0.0033(7)  |
| C6   | 0.0247(7)  | 0.0316(9) | 0.0172(7) | -0.0004(6)   | 0.0001(6)    | 0.0023(6)   |
| C7   | 0.0257(7)  | 0.0228(8) | 0.0279(8) | -0.0099(6)   | -0.0092(6)   | 0.0086(6)   |
| C8   | 0.0198(7)  | 0.0186(7) | 0.0214(7) | -0.0050(5)   | -0.0053(5)   | 0.0047(5)   |
| C9   | 0.0181(7)  | 0.0158(7) | 0.0165(7) | -0.0014(5)   | 0.0008(5)    | 0.0023(5)   |
| C10  | 0.0190(6)  | 0.0173(7) | 0.0176(7) | -0.0007(5)   | -0.0014(5)   | 0.0050(5)   |
| N1   | 0.0179(6)  | 0.0163(6) | 0.0188(6) | -0.0037(4)   | -0.0037(4)   | 0.0059(4)   |
| N2   | 0.0203(6)  | 0.0164(6) | 0.0195(6) | -0.0036(4)   | -0.0037(4)   | 0.0032(4)   |
| O1   | 0.0268(6)  | 0.0201(6) | 0.0265(6) | -0.0098(4)   | -0.0092(4)   | 0.0090(4)   |
| S1   | 0.0198(2)  | 0.0162(2) | 0.0199(2) | -0.00362(11) | -0.00536(15) | 0.00589(12) |

The form of the anisotropic displacement parameter is:

$$\exp[-2\pi(a^*U_{11}h^2 + b^*U_{22}k^2 + c^*U_{33}l^2 + 2b^*c^*U_{23}kl + 2a^*c^*U_{13}hl + 2a^*b^*U_{12}hk)]$$

**Table 5. Bond Distances in Compound 1361, Å**

|        |            |        |            |        |            |
|--------|------------|--------|------------|--------|------------|
| C1-C6  | 1.385(2)   | C1-C2  | 1.390(2)   | C1-C7  | 1.5144(19) |
| C2-C3  | 1.393(2)   | C3-C4  | 1.380(3)   | C4-C5  | 1.381(2)   |
| C5-C6  | 1.391(2)   | C7-C8  | 1.5280(19) | C8-C9  | 1.4995(18) |
| C9-N2  | 1.2954(19) | C9-N1  | 1.3738(18) | C10-O1 | 1.2267(18) |
| C10-N1 | 1.3659(18) | C10-S1 | 1.7537(14) | N2-S1  | 1.6923(12) |

**Table 6. Bond Angles in Compound 1361, °**

|           |            |           |            |           |            |
|-----------|------------|-----------|------------|-----------|------------|
| C6-C1-C2  | 118.25(13) | C6-C1-C7  | 121.53(14) | C2-C1-C7  | 120.19(14) |
| C1-C2-C3  | 120.75(15) | C4-C3-C2  | 120.23(15) | C3-C4-C5  | 119.55(14) |
| C4-C5-C6  | 120.07(15) | C1-C6-C5  | 121.12(14) | C1-C7-C8  | 110.83(11) |
| C9-C8-C7  | 113.61(11) | N2-C9-N1  | 116.79(13) | N2-C9-C8  | 123.82(13) |
| N1-C9-C8  | 119.38(12) | O1-C10-N1 | 127.23(12) | O1-C10-S1 | 127.09(11) |
| N1-C10-S1 | 105.67(10) | C10-N1-C9 | 114.32(12) | C9-N2-S1  | 109.12(10) |
| N2-S1-C10 | 94.07(6)   |           |            |           |            |

---

<sup>i</sup>Bruker (2009) SAINT. Bruker AXS Inc., Madison, Wisconsin, USA.

<sup>ii</sup>Bruker (2009) SHELXTL. Bruker AXS Inc., Madison, Wisconsin, USA.

<sup>iii</sup>Sheldrick, G.M. (2007) SADABS. University of Gottingen, Germany.

<sup>iv</sup>Sheldrick, G.M. (2008) Acta Cryst. A64,112-122.

<sup>v</sup>Sheldrick, G.M. (2008) Acta Cryst. A64,112-122.

<sup>vi</sup> $R1 = \sum |F_o| - |F_c| / \sum |F_o|$

$wR2 = [\sum w(F_o^2 - F_c^2)^2 / \sum w(F_o^2)]^{1/2}$

$GOF = [\sum w(F_o^2 - F_c^2)^2 / (n - p)]^{1/2}$

where n = the number of reflections and p = the number of parameters refined.

<sup>vii</sup>“ORTEP-II: A Fortran Thermal Ellipsoid Plot Program for Crystal Structure Illustrations”. C.K. Johnson (1976) ORNL-5138.

## X-ray Structure Determination of Compound 1362 (i.e., compound 22; CCDC 1428049)

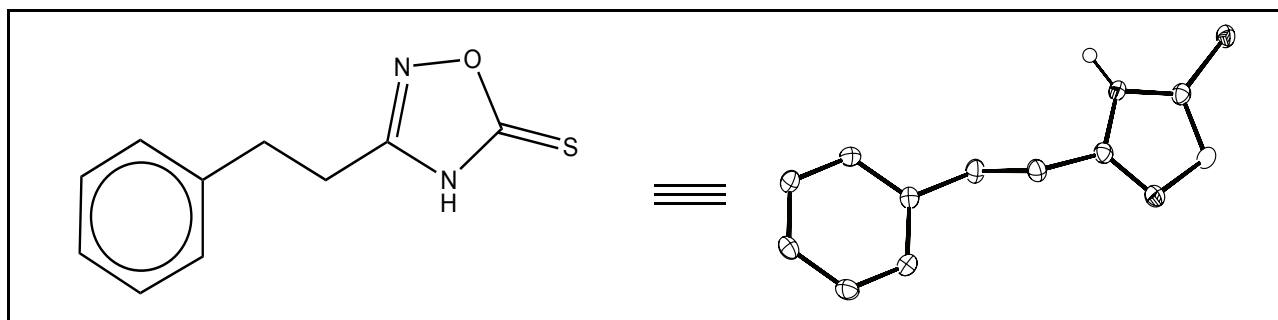

Compound 1362,  $C_{10}H_{12}N_2SO$ , crystallizes in the triclinic space group  $P\bar{1}$  (with  $a=7.1190(4)\text{\AA}$ ,  $b=7.2128(4)\text{\AA}$ ,  $c=11.7308(6)\text{\AA}$ ,  $\alpha=107.377(2)^\circ$ ,  $\beta=99.388(2)^\circ$ ,  $\gamma=115.088(2)^\circ$ ,  $V=490.50(5)\text{\AA}^3$ ,  $Z=2$ , and  $d_{\text{calc}}=1.410\text{ g/cm}^3$ ). X-ray intensity data were collected on a Bruker APEXII CCD area detector employing graphite-monochromated Mo- $K\alpha$  radiation ( $\lambda=0.71073\text{ \AA}$ ) at a temperature of 100(1)K. Preliminary indexing was performed from a series of thirty-six  $0.5^\circ$  rotation frames with exposures of 10 seconds. A total of 3660 frames were collected with a crystal to detector distance of 53.9 mm, rotation widths of  $0.5^\circ$  and exposures of 10 seconds:

| scan type | $2\theta$ | $\omega$ | $\phi$ | $\chi$ | frames |
|-----------|-----------|----------|--------|--------|--------|
| $\phi$    | 19.50     | 84.50    | 348.71 | -26.26 | 739    |
| $\phi$    | 27.00     | 16.75    | 328.61 | -63.64 | 739    |
| $\omega$  | 22.00     | 322.79   | 12.71  | 75.13  | 148    |
| $\phi$    | -23.00    | 74.75    | 342.59 | -39.24 | 739    |
| $\phi$    | 17.00     | 73.39    | 337.93 | -48.25 | 737    |
| $\omega$  | 19.50     | 131.49   | 240.29 | -86.54 | 72     |
| $\phi$    | 32.00     | 24.96    | 71.35  | 96.92  | 409    |
| $\omega$  | -18.00    | 121.69   | 109.45 | -98.74 | 77     |

The crystal grew as a non-merohedral twin; the program CELL\_NOW<sup>i</sup> was used to index the diffraction images and to determine the twinning mechanism. The crystal was twinned by a rotation of  $180^\circ$  about the 010 reciprocal direction. Rotation frames were integrated using SAINT<sup>ii</sup>, producing a listing of unaveraged  $F^2$  and  $\sigma(F^2)$  values which were then passed to the SHELXTL<sup>iii</sup> program package for further processing and structure solution. A total of 16670 reflections were measured over the ranges  $1.93 \leq \theta \leq 25.40^\circ$ ,  $-8 \leq h \leq 8$ ,  $-8 \leq k \leq 8$ ,  $0 \leq l \leq 14$  yielding 1803 unique reflections ( $R_{\text{int}} = 0.0167$ ). The intensity data were corrected for Lorentz and polarization effects and for absorption using TWINABS<sup>iv</sup>



(minimum and maximum transmission 0.6974, 0.7452).

The structure was solved by direct methods (SHELXS-97<sup>v</sup>). Refinement was by full-matrix least squares based on  $F^2$  using SHELXL-97.<sup>vi</sup> All reflections were used during refinement. The weighting scheme used was  $w=1/[\sigma^2(F_o^2) + (0.0298P)^2 + 0.2040P]$  where  $P = (F_o^2 + 2F_c^2)/3$ . Non-hydrogen atoms were refined anisotropically and hydrogen atoms were refined using a riding model. Refinement converged to  $R1=0.0238$  and  $wR2=0.0629$  for 1762 observed reflections for which  $F > 4\sigma(F)$  and  $R1=0.0243$  and  $wR2=0.0632$  and  $GOF = 1.055$  for all 1803 unique, non-zero reflections and 129 variables.<sup>vii</sup> The maximum  $\Delta/\sigma$  in the final cycle of least squares was 0.001 and the two most prominent peaks in the final difference Fourier were  $+0.270$  and  $-0.203 \text{ e}/\text{\AA}^3$ . The twinning parameter refined to a value of 0.251(2).

Table 1. lists cell information, data collection parameters, and refinement data. Final positional and equivalent isotropic thermal parameters are given in Tables 2. and 3. Anisotropic thermal parameters are in Table 4. Tables 5. and 6. list bond distances and bond angles. Figure 1. is an ORTEP<sup>viii</sup> representation of the molecule with 50% probability thermal ellipsoids displayed.

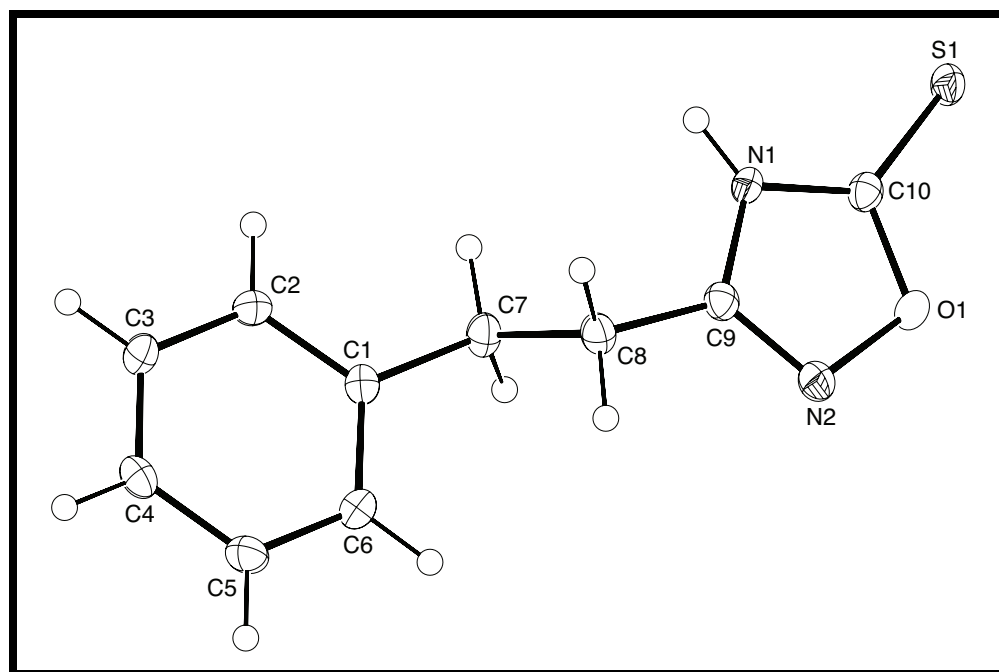

Figure 1. ORTEP drawing of the title compound with 50% probability thermal ellipsoids.

**Table 1. Summary of Structure Determination of Compound 1362**

|                                   |                                                   |
|-----------------------------------|---------------------------------------------------|
| Empirical formula                 | C <sub>10</sub> H <sub>12</sub> N <sub>2</sub> SO |
| Formula weight                    | 208.28                                            |
| Temperature                       | 100(1) K                                          |
| Wavelength                        | 0.71073 Å                                         |
| Crystal system                    | triclinic                                         |
| Space group                       | P $\bar{1}$                                       |
| Cell constants:                   |                                                   |
| a                                 | 7.1190(4) Å                                       |
| b                                 | 7.2128(4) Å                                       |
| c                                 | 11.7308(6) Å                                      |
| $\alpha$                          | 107.377(2)°                                       |
| $\beta$                           | 99.388(2)°                                        |
| $\gamma$                          | 115.088(2)°                                       |
| Volume                            | 490.50(5) Å <sup>3</sup>                          |
| Z                                 | 2                                                 |
| Density (calculated)              | 1.410 Mg/m <sup>3</sup>                           |
| Absorption coefficient            | 0.296 mm <sup>-1</sup>                            |
| F(000)                            | 220                                               |
| Crystal size                      | 0.25 x 0.20 x 0.12 mm <sup>3</sup>                |
| Theta range for data collection   | 1.93 to 25.40°                                    |
| Index ranges                      | -8 ≤ h ≤ 8, -8 ≤ k ≤ 8, 0 ≤ l ≤ 14                |
| Reflections collected             | 16670                                             |
| Independent reflections           | 1803 [R(int) = 0.0167]                            |
| Completeness to theta = 25.40°    | 99.6 %                                            |
| Absorption correction             | Semi-empirical from equivalents                   |
| Max. and min. transmission        | 0.7452 and 0.6974                                 |
| Refinement method                 | Full-matrix least-squares on F <sup>2</sup>       |
| Data / restraints / parameters    | 1803 / 0 / 129                                    |
| Goodness-of-fit on F <sup>2</sup> | 1.055                                             |
| Final R indices [I > 2σ(I)]       | R1 = 0.0238, wR2 = 0.0629                         |
| R indices (all data)              | R1 = 0.0243, wR2 = 0.0632                         |
| Largest diff. peak and hole       | 0.270 and -0.203 e.Å <sup>-3</sup>                |

**Table 2. Refined Positional Parameters for Compound 1362**

| Atom | x           | y           | z           | $U_{eq}, \text{Å}^2$ |
|------|-------------|-------------|-------------|----------------------|
| C1   | 0.3683(2)   | 0.1379(2)   | 0.24912(12) | 0.0153(3)            |
| C2   | 0.1687(2)   | 0.0552(2)   | 0.15769(12) | 0.0176(3)            |
| C3   | -0.0245(2)  | -0.0084(2)  | 0.18682(13) | 0.0189(3)            |
| C4   | -0.0199(2)  | 0.0116(2)   | 0.30831(13) | 0.0181(3)            |
| C5   | 0.1778(2)   | 0.0911(2)   | 0.39981(13) | 0.0208(3)            |
| C6   | 0.3700(2)   | 0.1528(2)   | 0.37021(12) | 0.0202(3)            |
| C7   | 0.5787(2)   | 0.2080(2)   | 0.21824(12) | 0.0182(3)            |
| C8   | 0.7506(2)   | 0.4564(2)   | 0.30123(12) | 0.0172(3)            |
| C9   | 0.9677(2)   | 0.5185(2)   | 0.28304(12) | 0.0153(3)            |
| C10  | 1.2171(2)   | 0.5727(2)   | 0.18857(12) | 0.0157(3)            |
| N1   | 1.00505(17) | 0.51265(17) | 0.17128(10) | 0.0153(2)            |
| N2   | 1.14366(18) | 0.57817(19) | 0.37029(10) | 0.0189(2)            |
| O1   | 1.30882(14) | 0.61502(15) | 0.30933(8)  | 0.0182(2)            |
| S1   | 1.35690(5)  | 0.59155(5)  | 0.08852(3)  | 0.01800(11)          |

$U_{eq} = \frac{1}{3}[U_{11}(aa^*)^2 + U_{22}(bb^*)^2 + U_{33}(cc^*)^2 + 2U_{12}aa^*bb^*\cos\gamma + 2U_{13}aa^*cc^*\cos\beta + 2U_{23}bb^*cc^*\cos\alpha]$

**Table 3. Positional Parameters for Hydrogens in Compound 1362**

| Atom | x       | y       | z      | $U_{iso}, \text{Å}^2$ |
|------|---------|---------|--------|-----------------------|
| H2   | 0.1642  | 0.0421  | 0.0759 | 0.023                 |
| H3   | -0.1572 | -0.0644 | 0.1245 | 0.025                 |
| H4   | -0.1485 | -0.0282 | 0.3284 | 0.024                 |
| H5   | 0.1817  | 0.1033  | 0.4815 | 0.028                 |
| H6   | 0.5017  | 0.2047  | 0.4322 | 0.027                 |
| H7a  | 0.5464  | 0.1836  | 0.1297 | 0.024                 |
| H7b  | 0.6394  | 0.1151  | 0.2308 | 0.024                 |
| H8a  | 0.6977  | 0.5501  | 0.2805 | 0.023                 |
| H8b  | 0.7685  | 0.4852  | 0.3896 | 0.023                 |
| H1   | 0.9089  | 0.4766  | 0.1019 | 0.020                 |

**Table 4. Refined Thermal Parameters (U's) for Compound 1362**

| Atom | $U_{11}$    | $U_{22}$    | $U_{33}$    | $U_{23}$    | $U_{13}$    | $U_{12}$    |
|------|-------------|-------------|-------------|-------------|-------------|-------------|
| C1   | 0.0136(6)   | 0.0138(6)   | 0.0175(6)   | 0.0057(5)   | 0.0050(5)   | 0.0067(5)   |
| C2   | 0.0175(6)   | 0.0210(6)   | 0.0143(6)   | 0.0083(5)   | 0.0054(5)   | 0.0090(5)   |
| C3   | 0.0134(6)   | 0.0213(6)   | 0.0207(7)   | 0.0094(5)   | 0.0033(5)   | 0.0081(5)   |
| C4   | 0.0164(6)   | 0.0181(6)   | 0.0231(7)   | 0.0102(5)   | 0.0107(5)   | 0.0089(5)   |
| C5   | 0.0224(7)   | 0.0226(7)   | 0.0160(6)   | 0.0093(5)   | 0.0079(5)   | 0.0088(6)   |
| C6   | 0.0155(6)   | 0.0226(7)   | 0.0174(6)   | 0.0082(5)   | 0.0017(5)   | 0.0065(5)   |
| C7   | 0.0134(6)   | 0.0191(6)   | 0.0186(6)   | 0.0055(5)   | 0.0052(5)   | 0.0071(5)   |
| C8   | 0.0144(6)   | 0.0179(6)   | 0.0188(6)   | 0.0073(5)   | 0.0068(5)   | 0.0072(5)   |
| C9   | 0.0146(6)   | 0.0126(6)   | 0.0168(6)   | 0.0056(5)   | 0.0044(5)   | 0.0057(5)   |
| C10  | 0.0142(6)   | 0.0135(6)   | 0.0172(6)   | 0.0054(5)   | 0.0033(5)   | 0.0064(5)   |
| N1   | 0.0107(5)   | 0.0184(5)   | 0.0147(5)   | 0.0069(4)   | 0.0028(4)   | 0.0061(4)   |
| N2   | 0.0152(5)   | 0.0231(6)   | 0.0180(6)   | 0.0093(5)   | 0.0075(4)   | 0.0082(5)   |
| O1   | 0.0127(4)   | 0.0242(5)   | 0.0157(4)   | 0.0077(4)   | 0.0031(3)   | 0.0084(4)   |
| S1   | 0.01257(16) | 0.02210(18) | 0.01823(18) | 0.00789(13) | 0.00591(12) | 0.00781(13) |

The form of the anisotropic displacement parameter is:

$$\exp[-2\pi(a^*U_{11}h^2 + b^*U_{22}k^2 + c^*U_{33}l^2 + 2b^*c^*U_{23}kl + 2a^*c^*U_{13}hl + 2a^*b^*U_{12}hk)]$$

**Table 5. Bond Distances in Compound 1362, Å**

|        |            |        |            |        |            |
|--------|------------|--------|------------|--------|------------|
| C1-C2  | 1.3884(18) | C1-C6  | 1.3899(18) | C1-C7  | 1.5081(17) |
| C2-C3  | 1.3896(18) | C3-C4  | 1.3824(19) | C4-C5  | 1.3842(19) |
| C5-C6  | 1.3862(19) | C7-C8  | 1.5381(18) | C8-C9  | 1.4876(17) |
| C9-N2  | 1.2898(17) | C9-N1  | 1.3716(16) | C10-O1 | 1.3406(16) |
| C10-N1 | 1.3419(16) | C10-S1 | 1.6577(13) | N2-O1  | 1.4447(13) |

**Table 6. Bond Angles in Compound 1362, °**

|           |            |           |            |           |            |
|-----------|------------|-----------|------------|-----------|------------|
| C2-C1-C6  | 118.41(12) | C2-C1-C7  | 121.14(12) | C6-C1-C7  | 120.45(12) |
| C1-C2-C3  | 120.88(12) | C4-C3-C2  | 120.13(12) | C3-C4-C5  | 119.48(12) |
| C4-C5-C6  | 120.26(12) | C5-C6-C1  | 120.83(12) | C1-C7-C8  | 111.95(10) |
| C9-C8-C7  | 112.09(10) | N2-C9-N1  | 111.49(11) | N2-C9-C8  | 123.77(12) |
| N1-C9-C8  | 124.70(11) | O1-C10-N1 | 106.72(11) | O1-C10-S1 | 122.47(9)  |
| N1-C10-S1 | 130.78(10) | C10-N1-C9 | 108.42(11) | C9-N2-O1  | 104.29(10) |
| C10-O1-N2 | 109.07(9)  |           |            |           |            |

---

<sup>i</sup>Sheldrick, G.M. (2008) CELL\_NOW. University of Gottingen, Germany.

<sup>ii</sup>Bruker (2009) SAINT. Bruker AXS Inc., Madison, Wisconsin, USA.

<sup>iii</sup>Bruker (2009) SHELXTL. Bruker AXS Inc., Madison, Wisconsin, USA.

<sup>iv</sup>Sheldrick, G.M. (2007) TWINABS. University of Gottingen, Germany.

<sup>v</sup>Sheldrick, G.M. (2008) Acta Cryst. A64,112-122.

<sup>vi</sup>Sheldrick, G.M. (2008) Acta Cryst. A64,112-122.

<sup>vii</sup> $R1 = \sum |F_o| - |F_c| / \sum |F_o|$

$wR2 = [\sum w(F_o^2 - F_c^2)^2 / \sum w(F_o^2)^2]^{1/2}$

$GOF = [\sum w(F_o^2 - F_c^2)^2 / (n - p)]^{1/2}$

where n = the number of reflections and p = the number of parameters refined.

<sup>viii</sup>“ORTEP-II: A Fortran Thermal Ellipsoid Plot Program for Crystal Structure Illustrations”. C.K. Johnson (1976) ORNL-5138.

### X-ray Structure Determination of Compound 1422 (i.e., compound 26; CCDC 1427564)

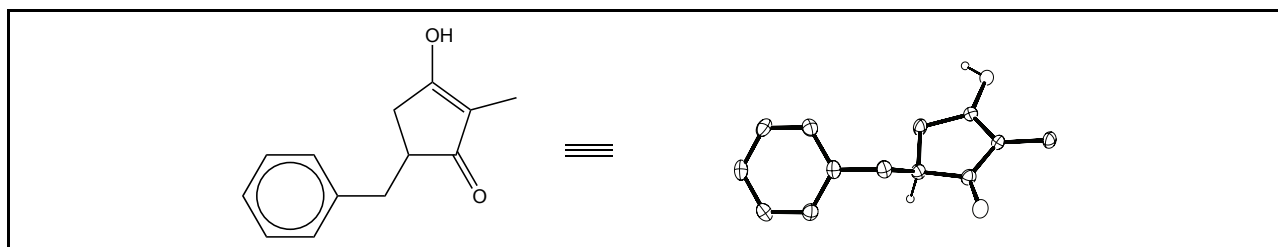

Compound 1422, C<sub>13</sub>H<sub>14</sub>O<sub>2</sub>, crystallizes in the monoclinic space group P2<sub>1</sub>/c (systematic absences 0k0: k=odd and h0l: l=odd) with a=6.4318(2)Å, b=7.3862(2)Å, c=22.7380(7)Å, β=96.924(2)°, V=1072.33(6)Å<sup>3</sup>, Z=4, and d<sub>calc</sub>=1.253 g/cm<sup>3</sup>. X-ray intensity data were collected on a Bruker APEXII CCD area detector employing graphite-monochromated Mo-Kα radiation (λ=0.71073 Å) at a temperature of 100(1)K. Preliminary indexing was performed from a series of thirty-six 0.5° rotation frames with exposures of 10 seconds. A total of 2348 frames were collected with a crystal to detector distance of 37.4 mm, rotation widths of 0.5° and exposures of 10 seconds:

| scan type | 2θ     | ω      | φ      | χ      | frames |
|-----------|--------|--------|--------|--------|--------|
| φ         | -23.00 | 315.83 | 12.48  | 28.88  | 739    |
| φ         | 19.50  | 59.55  | 348.71 | -26.26 | 161    |
| ω         | -15.50 | 242.98 | 18.69  | 41.79  | 212    |
| ω         | 17.00  | 321.50 | 184.44 | 82.07  | 116    |

Rotation frames were integrated using SAINT<sup>i</sup>, producing a listing of unaveraged F<sup>2</sup> and σ(F<sup>2</sup>) values which were then passed to the SHELXTL<sup>ii</sup> program package for further processing and structure solution. A total of 11418 reflections were measured over the ranges 2.90 ≤ θ ≤ 25.39°, -7 ≤ h ≤ 7, -8 ≤ k ≤ 8, -27 ≤ l ≤ 24 yielding 1966 unique reflections (Rint = 0.0276). The intensity data were corrected for Lorentz and polarization effects and for absorption using SADABS<sup>iii</sup> (minimum and maximum transmission 0.7019, 0.7452).

The structure was solved by direct methods (SHELXS-97<sup>iv</sup>). Refinement was by full-matrix least squares based on F<sup>2</sup> using SHELXL-97.<sup>v</sup> All reflections were used during refinement. The weighting scheme used was w=1/[σ<sup>2</sup>(F<sub>o</sub><sup>2</sup>) + (0.0400P)<sup>2</sup> + 0.5474P] where P = (F<sub>o</sub><sup>2</sup> + 2F<sub>c</sub><sup>2</sup>)/3. Non-hydrogen atoms were refined anisotropically and hydrogen atoms were refined using a riding model. Refinement

converged to  $R1=0.0363$  and  $wR2=0.0870$  for 1627 observed reflections for which  $F > 4\sigma(F)$  and  $R1=0.0473$  and  $wR2=0.0929$  and  $GOF = 1.029$  for all 1966 unique, non-zero reflections and 139 variables.<sup>vi</sup> The maximum  $\Delta/\sigma$  in the final cycle of least squares was 0.000 and the two most prominent peaks in the final difference Fourier were  $+0.235$  and  $-0.171 \text{ e}/\text{\AA}^3$ .

Table 1. lists cell information, data collection parameters, and refinement data. Final positional and equivalent isotropic thermal parameters are given in Tables 2. and 3. Anisotropic thermal parameters are in Table 4. Tables 5. and 6. list bond distances and bond angles. Figure 1. is an ORTEP<sup>vii</sup> representation of the molecule with 50% probability thermal ellipsoids displayed.

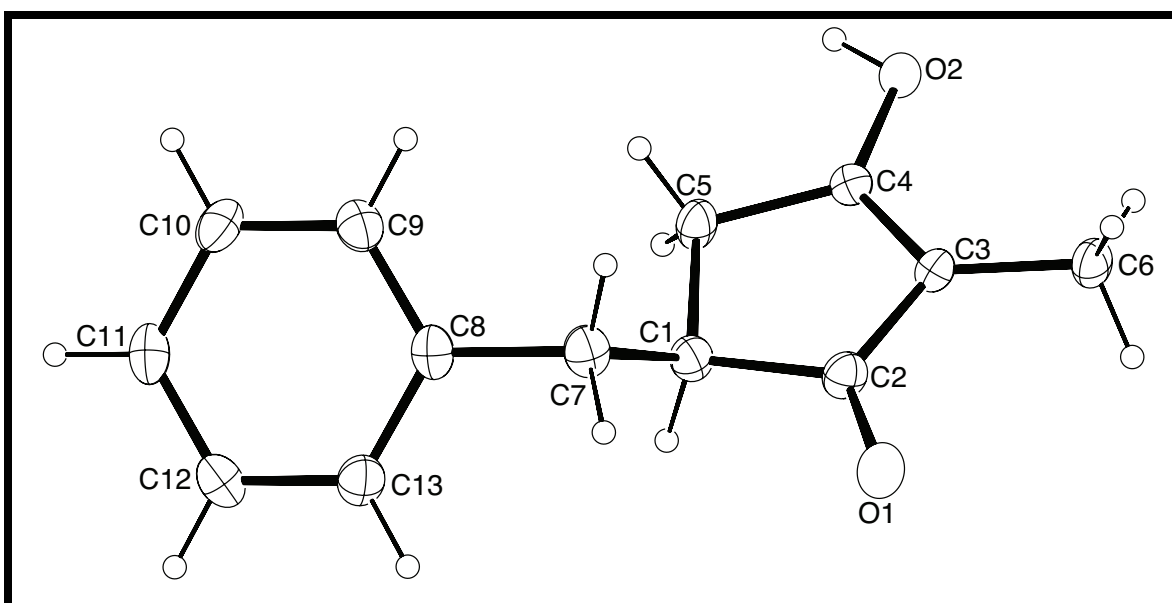

Figure 1. ORTEP drawing of the title compound with 50% probability thermal ellipsoids.

**Table 1. Summary of Structure Determination of Compound 1422**

|                                   |                                                |
|-----------------------------------|------------------------------------------------|
| Empirical formula                 | C <sub>13</sub> H <sub>14</sub> O <sub>2</sub> |
| Formula weight                    | 202.24                                         |
| Temperature                       | 100(1) K                                       |
| Wavelength                        | 0.71073 Å                                      |
| Crystal system                    | monoclinic                                     |
| Space group                       | P2 <sub>1</sub> /c                             |
| Cell constants:                   |                                                |
| a                                 | 6.4318(2) Å                                    |
| b                                 | 7.3862(2) Å                                    |
| c                                 | 22.7380(7) Å                                   |
| β                                 | 96.924(2)°                                     |
| Volume                            | 1072.33(6) Å <sup>3</sup>                      |
| Z                                 | 4                                              |
| Density (calculated)              | 1.253 Mg/m <sup>3</sup>                        |
| Absorption coefficient            | 0.083 mm <sup>-1</sup>                         |
| F(000)                            | 432                                            |
| Crystal size                      | 0.28 x 0.12 x 0.03 mm <sup>3</sup>             |
| Theta range for data collection   | 2.90 to 25.39°                                 |
| Index ranges                      | -7 ≤ h ≤ 7, -8 ≤ k ≤ 8, -27 ≤ l ≤ 24           |
| Reflections collected             | 11418                                          |
| Independent reflections           | 1966 [R(int) = 0.0276]                         |
| Completeness to theta = 25.39°    | 99.9 %                                         |
| Absorption correction             | Semi-empirical from equivalents                |
| Max. and min. transmission        | 0.7452 and 0.7019                              |
| Refinement method                 | Full-matrix least-squares on F <sup>2</sup>    |
| Data / restraints / parameters    | 1966 / 0 / 139                                 |
| Goodness-of-fit on F <sup>2</sup> | 1.029                                          |
| Final R indices [I > 2σ(I)]       | R1 = 0.0363, wR2 = 0.0870                      |
| R indices (all data)              | R1 = 0.0473, wR2 = 0.0929                      |
| Largest diff. peak and hole       | 0.235 and -0.171 e.Å <sup>-3</sup>             |



**Table 2. Refined Positional Parameters for Compound 1422**

| Atom | x            | y           | z          | $U_{eq}, \text{Å}^2$ |
|------|--------------|-------------|------------|----------------------|
| O1   | -0.07936(15) | 0.44577(15) | 0.41160(5) | 0.0269(3)            |
| O2   | 0.62543(14)  | 0.28564(14) | 0.46054(4) | 0.0184(2)            |
| C1   | 0.2302(2)    | 0.5683(2)   | 0.37514(6) | 0.0189(3)            |
| C2   | 0.1143(2)    | 0.4414(2)   | 0.41265(6) | 0.0193(3)            |
| C3   | 0.2569(2)    | 0.32292(19) | 0.44668(6) | 0.0159(3)            |
| C4   | 0.4533(2)    | 0.36874(19) | 0.43611(6) | 0.0153(3)            |
| C5   | 0.4610(2)    | 0.5228(2)   | 0.39380(7) | 0.0203(3)            |
| C6   | 0.1915(2)    | 0.1762(2)   | 0.48542(6) | 0.0200(3)            |
| C7   | 0.1703(2)    | 0.7665(2)   | 0.38387(7) | 0.0216(3)            |
| C8   | 0.2629(2)    | 0.8938(2)   | 0.34196(6) | 0.0192(3)            |
| C9   | 0.4546(2)    | 0.9770(2)   | 0.35806(6) | 0.0222(3)            |
| C10  | 0.5432(2)    | 1.0898(2)   | 0.31926(7) | 0.0247(4)            |
| C11  | 0.4396(2)    | 1.1216(2)   | 0.26319(7) | 0.0237(3)            |
| C12  | 0.2497(2)    | 1.0390(2)   | 0.24631(7) | 0.0240(4)            |
| C13  | 0.1610(2)    | 0.9267(2)   | 0.28537(7) | 0.0228(3)            |

$U_{eq} = \frac{1}{3}[U_{11}(aa^*)^2 + U_{22}(bb^*)^2 + U_{33}(cc^*)^2 + 2U_{12}aa^*bb^*\cos\gamma + 2U_{13}aa^*cc^*\cos\beta + 2U_{23}bb^*cc^*\cos\alpha]$

**Table 3. Positional Parameters for Hydrogens in Compound 1422**

| Atom | x      | y      | z      | $U_{iso}, \text{Å}^2$ |
|------|--------|--------|--------|-----------------------|
| H2   | 0.7278 | 0.3290 | 0.4474 | 0.025                 |
| H1   | 0.1945 | 0.5364 | 0.3333 | 0.025                 |
| H5a  | 0.5296 | 0.4871 | 0.3599 | 0.027                 |
| H5b  | 0.5348 | 0.6255 | 0.4130 | 0.027                 |
| H6a  | 0.3073 | 0.0960 | 0.4961 | 0.030                 |
| H6b  | 0.0774 | 0.1096 | 0.4645 | 0.030                 |
| H6c  | 0.1475 | 0.2283 | 0.5206 | 0.030                 |
| H7a  | 0.0189 | 0.7775 | 0.3780 | 0.029                 |
| H7b  | 0.2179 | 0.8021 | 0.4243 | 0.029                 |
| H9   | 0.5251 | 0.9567 | 0.3957 | 0.029                 |
| H10  | 0.6721 | 1.1441 | 0.3308 | 0.033                 |
| H11  | 0.4979 | 1.1982 | 0.2371 | 0.032                 |
| H12  | 0.1806 | 1.0586 | 0.2085 | 0.032                 |
| H13  | 0.0320 | 0.8728 | 0.2737 | 0.030                 |

**Table 4. Refined Thermal Parameters (U's) for Compound 1422**

| Atom | U <sub>11</sub> | U <sub>22</sub> | U <sub>33</sub> | U <sub>23</sub> | U <sub>13</sub> | U <sub>12</sub> |
|------|-----------------|-----------------|-----------------|-----------------|-----------------|-----------------|
| O1   | 0.0121(5)       | 0.0307(6)       | 0.0388(7)       | 0.0117(5)       | 0.0064(4)       | 0.0009(4)       |
| O2   | 0.0118(5)       | 0.0204(6)       | 0.0234(5)       | 0.0046(4)       | 0.0033(4)       | 0.0001(4)       |
| C1   | 0.0153(7)       | 0.0207(8)       | 0.0212(7)       | 0.0032(6)       | 0.0037(6)       | 0.0005(6)       |
| C2   | 0.0154(7)       | 0.0202(8)       | 0.0228(8)       | 0.0006(6)       | 0.0045(6)       | -0.0003(6)      |
| C3   | 0.0150(7)       | 0.0148(7)       | 0.0184(7)       | -0.0004(6)      | 0.0035(5)       | -0.0016(5)      |
| C4   | 0.0155(7)       | 0.0142(7)       | 0.0163(7)       | -0.0020(6)      | 0.0023(5)       | 0.0009(5)       |
| C5   | 0.0149(7)       | 0.0193(8)       | 0.0275(8)       | 0.0052(6)       | 0.0053(6)       | -0.0002(6)      |
| C6   | 0.0172(7)       | 0.0202(8)       | 0.0234(8)       | 0.0041(6)       | 0.0056(6)       | -0.0019(6)      |
| C7   | 0.0198(7)       | 0.0221(8)       | 0.0236(8)       | 0.0027(6)       | 0.0061(6)       | 0.0024(6)       |
| C8   | 0.0203(7)       | 0.0154(8)       | 0.0232(8)       | 0.0016(6)       | 0.0083(6)       | 0.0046(6)       |
| C9   | 0.0288(8)       | 0.0194(8)       | 0.0184(7)       | -0.0008(6)      | 0.0035(6)       | 0.0008(6)       |
| C10  | 0.0270(8)       | 0.0194(8)       | 0.0281(8)       | -0.0034(7)      | 0.0047(6)       | -0.0073(7)      |
| C11  | 0.0310(9)       | 0.0182(8)       | 0.0238(8)       | 0.0030(6)       | 0.0109(6)       | -0.0009(6)      |
| C12  | 0.0264(8)       | 0.0251(8)       | 0.0207(8)       | 0.0049(6)       | 0.0032(6)       | 0.0044(6)       |
| C13  | 0.0170(7)       | 0.0222(8)       | 0.0295(8)       | 0.0034(7)       | 0.0035(6)       | 0.0012(6)       |

The form of the anisotropic displacement parameter is:  
 $\exp[-2\pi(a^2U_{11}h^2+b^2U_{22}k^2+c^2U_{33}l^2+2b^*c^*U_{23}kl+2a^*c^*U_{13}hl+2a^*b^*U_{12}hk)]$

**Table 5. Bond Distances in Compound 1422, Å**

|         |            |         |            |         |          |
|---------|------------|---------|------------|---------|----------|
| O1-C2   | 1.2435(17) | O2-C4   | 1.3274(17) | C1-C2   | 1.521(2) |
| C1-C5   | 1.5311(19) | C1-C7   | 1.533(2)   | C2-C3   | 1.426(2) |
| C3-C4   | 1.3573(19) | C3-C6   | 1.489(2)   | C4-C5   | 1.495(2) |
| C7-C8   | 1.511(2)   | C8-C9   | 1.387(2)   | C8-C13  | 1.393(2) |
| C9-C10  | 1.385(2)   | C10-C11 | 1.386(2)   | C11-C12 | 1.378(2) |
| C12-C13 | 1.387(2)   |         |            |         |          |

**Table 6. Bond Angles in Compound 1422, °**

|            |            |             |            |             |            |
|------------|------------|-------------|------------|-------------|------------|
| C2-C1-C5   | 103.51(11) | C2-C1-C7    | 111.58(12) | C5-C1-C7    | 115.11(12) |
| O1-C2-C3   | 127.10(13) | O1-C2-C1    | 122.06(13) | C3-C2-C1    | 110.84(12) |
| C4-C3-C2   | 107.59(12) | C4-C3-C6    | 128.44(13) | C2-C3-C6    | 123.96(12) |
| O2-C4-C3   | 123.91(13) | O2-C4-C5    | 122.06(12) | C3-C4-C5    | 114.04(12) |
| C4-C5-C1   | 103.86(11) | C8-C7-C1    | 112.83(12) | C9-C8-C13   | 118.07(13) |
| C9-C8-C7   | 120.99(13) | C13-C8-C7   | 120.91(13) | C10-C9-C8   | 121.29(14) |
| C9-C10-C11 | 119.95(14) | C12-C11-C10 | 119.52(14) | C11-C12-C13 | 120.37(14) |
| C12-C13-C8 | 120.79(14) |             |            |             |            |

---

<sup>i</sup>Bruker (2009) SAINT. Bruker AXS Inc., Madison, Wisconsin, USA.

<sup>ii</sup>Bruker (2009) SHELXTL. Bruker AXS Inc., Madison, Wisconsin, USA.

<sup>iii</sup>Sheldrick, G.M. (2007) SADABS. University of Gottingen, Germany.

<sup>iv</sup>Sheldrick, G.M. (2008) Acta Cryst. A64,112-122.

<sup>v</sup>Sheldrick, G.M. (2008) Acta Cryst. A64,112-122.

<sup>vi</sup> $R1 = \sum |F_o| - |F_c| / \sum |F_o|$

$wR2 = [\sum w(F_o^2 - F_c^2)^2 / \sum w(F_o^2)]^{1/2}$

$GOF = [\sum w(F_o^2 - F_c^2)^2 / (n - p)]^{1/2}$

where n = the number of reflections and p = the number of parameters refined.

<sup>vii</sup>“ORTEP-II: A Fortran Thermal Ellipsoid Plot Program for Crystal Structure Illustrations”. C.K. Johnson (1976) ORNL-5138.

### X-ray Structure Determination of Compound 1394 (i.e., compound 28; CCDC 1436469)

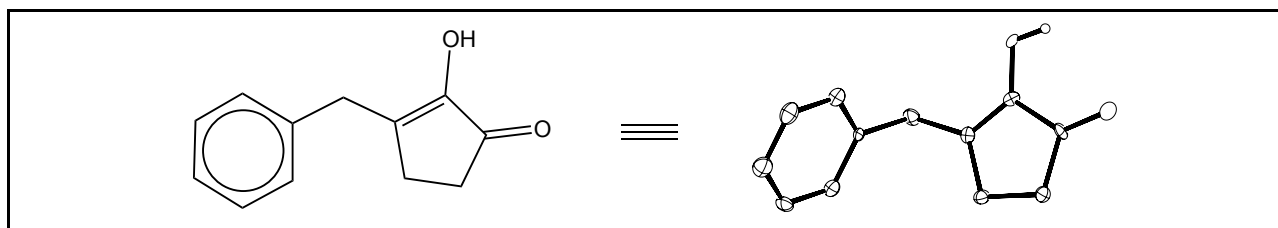

Compound 1394,  $C_{12}H_{12}O_2$ , crystallizes in the orthorhombic space group  $Pca2_1$  (systematic absences  $h0l$ :  $h=\text{odd}$  and  $0kl$ :  $k=\text{odd}$ ) with  $a=15.4887(10)\text{\AA}$ ,  $b=6.0483(4)\text{\AA}$ ,  $c=20.5214(13)\text{\AA}$ ,  $V=1922.5(2)\text{\AA}^3$ ,  $Z=8$ , and  $d_{\text{calc}}=1.301\text{ g/cm}^3$ . X-ray intensity data were collected on a Bruker APEXII CCD area detector employing graphite-monochromated Mo- $K\alpha$  radiation ( $\lambda=0.71073\text{ \AA}$ ) at a temperature of  $100(1)\text{K}$ . Preliminary indexing was performed from a series of thirty-six  $0.5^\circ$  rotation frames with exposures of 10 seconds. A total of 2596 frames were collected with a crystal to detector distance of 69.8 mm, rotation widths of  $0.5^\circ$  and exposures of 20 seconds:

| scan type | $2\theta$ | $\omega$ | $\phi$ | $\chi$ | frames |
|-----------|-----------|----------|--------|--------|--------|
| $\phi$    | -30.50    | 202.72   | 17.77  | 39.97  | 739    |
| $\omega$  | 7.00      | 347.95   | 171.84 | 64.29  | 87     |
| $\omega$  | 29.50     | 119.96   | 49.05  | -73.06 | 117    |
| $\omega$  | -10.50    | 271.25   | 32.59  | 34.46  | 226    |
| $\omega$  | -30.50    | 204.76   | 161.19 | 41.79  | 289    |
| $\phi$    | -30.50    | 310.69   | 71.63  | 54.21  | 646    |
| $\phi$    | 32.00     | 181.94   | 25.04  | -99.10 | 382    |
| $\omega$  | -25.50    | 315.40   | 157.20 | -88.81 | 110    |

Rotation frames were integrated using SAINT<sup>i</sup>, producing a listing of unaveraged  $F^2$  and  $\sigma(F^2)$  values which were then passed to the SHELXTL<sup>ii</sup> program package for further processing and structure solution. A total of 15142 reflections were measured over the ranges  $1.98 \leq \theta \leq 25.37^\circ$ ,  $-18 \leq h \leq 18$ ,  $-7 \leq k \leq 7$ ,  $-24 \leq l \leq 24$  yielding 3522 unique reflections ( $R_{\text{int}} = 0.0574$ ). The intensity data were corrected for Lorentz and polarization effects and for absorption using SADABS<sup>iii</sup> (minimum and maximum transmission 0.5981, 0.7452).

The structure was solved by direct methods (SHELXS-97<sup>iv</sup>). Refinement was by full-matrix least squares based on  $F^2$  using SHELXL-97.<sup>v</sup> All reflections were used during refinement. The weighting

scheme used was  $w=1/[\sigma^2(F_o^2) + (0.1296P)^2 + 2.0542P]$  where  $P = (F_o^2 + 2F_c^2)/3$ . Non-hydrogen atoms were refined anisotropically and hydrogen atoms were refined using a riding model. Refinement converged to  $R1=0.0780$  and  $wR2=0.2046$  for 3246 observed reflections for which  $F > 4\sigma(F)$  and  $R1=0.0826$  and  $wR2=0.2094$  and  $GOF = 1.134$  for all 3522 unique, non-zero reflections and 256 variables.<sup>vi</sup> The maximum  $\Delta/\sigma$  in the final cycle of least squares was 0.000 and the two most prominent peaks in the final difference Fourier were  $+0.862$  and  $-0.442 \text{ e}/\text{\AA}^3$ .

Table 1. lists cell information, data collection parameters, and refinement data. Final positional and equivalent isotropic thermal parameters are given in Tables 2. and 3. Anisotropic thermal parameters are in Table 4. Tables 5. and 6. list bond distances and bond angles. Figures 1. and 2. are ORTEP<sup>vii</sup> representations of the molecule with 50% probability thermal ellipsoids displayed.

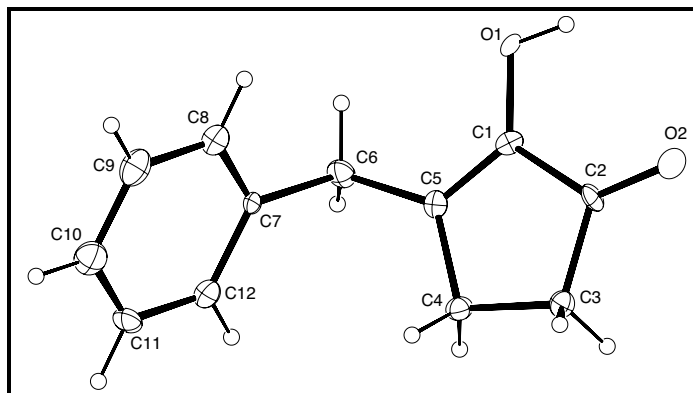

Figure 1. ORTEP drawing of molecule no. 1 of the asymmetric unit with 50% probability thermal ellipsoids.

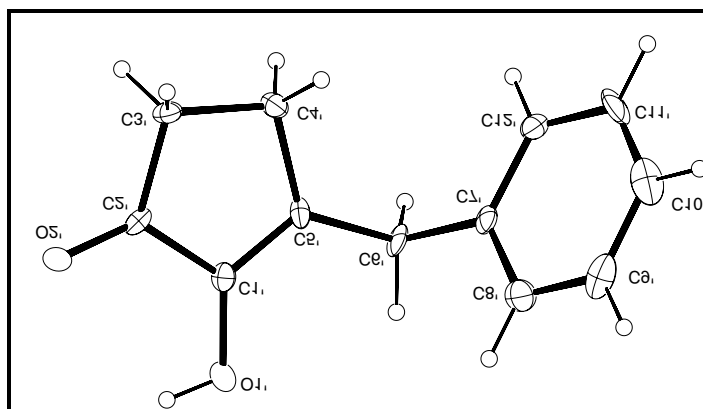

Figure 2. ORTEP drawing of molecule no. 2 of the asymmetric unit with 50% probability thermal ellipsoids.

**Table 1. Summary of Structure Determination of Compound 1394**

|                                   |                                                |
|-----------------------------------|------------------------------------------------|
| Empirical formula                 | C <sub>12</sub> H <sub>12</sub> O <sub>2</sub> |
| Formula weight                    | 188.22                                         |
| Temperature                       | 100(1) K                                       |
| Wavelength                        | 0.71073 Å                                      |
| Crystal system                    | orthorhombic                                   |
| Space group                       | Pca2 <sub>1</sub>                              |
| Cell constants:                   |                                                |
| a                                 | 15.4887(10) Å                                  |
| b                                 | 6.0483(4) Å                                    |
| c                                 | 20.5214(13) Å                                  |
| Volume                            | 1922.5(2) Å <sup>3</sup>                       |
| Z                                 | 8                                              |
| Density (calculated)              | 1.301 Mg/m <sup>3</sup>                        |
| Absorption coefficient            | 0.088 mm <sup>-1</sup>                         |
| F(000)                            | 800                                            |
| Crystal size                      | 0.40 x 0.12 x 0.10 mm <sup>3</sup>             |
| Theta range for data collection   | 1.98 to 25.37°                                 |
| Index ranges                      | -18 ≤ h ≤ 18, -7 ≤ k ≤ 7, -24 ≤ l ≤ 24         |
| Reflections collected             | 15142                                          |
| Independent reflections           | 3522 [R(int) = 0.0574]                         |
| Completeness to theta = 25.37°    | 99.9 %                                         |
| Absorption correction             | Semi-empirical from equivalents                |
| Max. and min. transmission        | 0.7452 and 0.5981                              |
| Refinement method                 | Full-matrix least-squares on F <sup>2</sup>    |
| Data / restraints / parameters    | 3522 / 1 / 256                                 |
| Goodness-of-fit on F <sup>2</sup> | 1.134                                          |
| Final R indices [I > 2σ(I)]       | R1 = 0.0780, wR2 = 0.2046                      |
| R indices (all data)              | R1 = 0.0826, wR2 = 0.2094                      |
| Absolute structure parameter      | -2(2)                                          |
| Largest diff. peak and hole       | 0.862 and -0.442 e.Å <sup>-3</sup>             |

**Table 2. Refined Positional Parameters for Compound 1394**

| Atom | x           | y          | z           | $U_{eq}, \text{Å}^2$ |
|------|-------------|------------|-------------|----------------------|
| O1   | 0.51208(17) | 0.5666(4)  | 0.52018(15) | 0.0160(6)            |
| O2   | 0.69337(18) | 0.6114(5)  | 0.55554(14) | 0.0169(6)            |
| C1   | 0.5578(2)   | 0.4209(6)  | 0.55543(17) | 0.0102(7)            |
| C2   | 0.6484(3)   | 0.4558(6)  | 0.57241(17) | 0.0117(8)            |
| C3   | 0.6762(2)   | 0.2657(6)  | 0.6154(2)   | 0.0143(8)            |
| C4   | 0.5980(2)   | 0.1081(6)  | 0.61684(19) | 0.0134(8)            |
| C5   | 0.5296(3)   | 0.2258(6)  | 0.57886(17) | 0.0110(8)            |
| C6   | 0.4412(3)   | 0.1303(7)  | 0.56704(19) | 0.0158(8)            |
| C7   | 0.3938(2)   | 0.0792(6)  | 0.62976(19) | 0.0124(8)            |
| C8   | 0.3430(3)   | 0.2394(7)  | 0.6591(2)   | 0.0184(9)            |
| C9   | 0.3011(3)   | 0.1945(7)  | 0.7171(2)   | 0.0211(9)            |
| C10  | 0.3088(3)   | -0.0127(8) | 0.7463(2)   | 0.0217(9)            |
| C11  | 0.3595(3)   | -0.1706(7) | 0.7172(2)   | 0.0182(9)            |
| C12  | 0.4014(3)   | -0.1262(7) | 0.6601(2)   | 0.0174(9)            |
| O1'  | 0.75431(18) | 0.9619(4)  | 0.48658(14) | 0.0178(6)            |
| O2'  | 0.57357(18) | 0.9129(4)  | 0.45099(15) | 0.0146(6)            |
| C1'  | 0.7084(2)   | 1.1030(6)  | 0.45061(18) | 0.0122(8)            |
| C2'  | 0.6174(2)   | 1.0704(6)  | 0.43412(17) | 0.0101(8)            |
| C3'  | 0.5890(3)   | 1.2612(6)  | 0.39332(19) | 0.0132(8)            |
| C4'  | 0.6676(2)   | 1.4158(6)  | 0.38930(19) | 0.0136(8)            |
| C5'  | 0.7371(3)   | 1.2967(6)  | 0.42658(17) | 0.0125(8)            |
| C6'  | 0.8246(2)   | 1.3924(7)  | 0.43651(19) | 0.0151(8)            |
| C7'  | 0.8727(2)   | 1.4232(6)  | 0.37292(19) | 0.0129(8)            |
| C8'  | 0.9243(3)   | 1.2516(7)  | 0.3482(2)   | 0.0192(9)            |
| C9'  | 0.9672(3)   | 1.2777(8)  | 0.2895(2)   | 0.0264(10)           |
| C10' | 0.9582(3)   | 1.4716(8)  | 0.2539(2)   | 0.0254(10)           |
| C11' | 0.9089(3)   | 1.6424(8)  | 0.2776(2)   | 0.0271(11)           |
| C12' | 0.8659(3)   | 1.6167(7)  | 0.3378(2)   | 0.0191(9)            |

$U_{eq} = \frac{1}{3}[U_{11}(aa^*)^2 + U_{22}(bb^*)^2 + U_{33}(cc^*)^2 + 2U_{12}aa^*bb^*\cos\gamma + 2U_{13}aa^*cc^*\cos\beta + 2U_{23}bb^*cc^*\cos\alpha]$



**Table 3. Positional Parameters for Hydrogens in Compound 1394**

| Atom | x      | y       | z      | $U_{iso}, \text{Å}^2$ |
|------|--------|---------|--------|-----------------------|
| H1   | 0.5444 | 0.6630  | 0.5062 | 0.024                 |
| H3a  | 0.6899 | 0.3175  | 0.6590 | 0.019                 |
| H3b  | 0.7265 | 0.1922  | 0.5974 | 0.019                 |
| H4a  | 0.6122 | -0.0324 | 0.5967 | 0.018                 |
| H4b  | 0.5791 | 0.0817  | 0.6612 | 0.018                 |
| H6a  | 0.4467 | -0.0044 | 0.5417 | 0.021                 |
| H6b  | 0.4074 | 0.2345  | 0.5417 | 0.021                 |
| H8   | 0.3370 | 0.3775  | 0.6397 | 0.024                 |
| H9   | 0.2677 | 0.3033  | 0.7368 | 0.028                 |
| H10  | 0.2799 | -0.0435 | 0.7850 | 0.029                 |
| H11  | 0.3653 | -0.3089 | 0.7365 | 0.024                 |
| H12  | 0.4357 | -0.2348 | 0.6412 | 0.023                 |
| H1'  | 0.7229 | 0.8618  | 0.4994 | 0.027                 |
| H3a' | 0.5404 | 1.3362  | 0.4134 | 0.018                 |
| H3b' | 0.5721 | 1.2117  | 0.3502 | 0.018                 |
| H4a' | 0.6847 | 1.4391  | 0.3444 | 0.018                 |
| H4b' | 0.6549 | 1.5578  | 0.4091 | 0.018                 |
| H6a' | 0.8578 | 1.2955  | 0.4647 | 0.020                 |
| H6b' | 0.8192 | 1.5343  | 0.4582 | 0.020                 |
| H8'  | 0.9297 | 1.1202  | 0.3714 | 0.026                 |
| H9'  | 1.0022 | 1.1647  | 0.2739 | 0.035                 |
| H10' | 0.9858 | 1.4859  | 0.2139 | 0.034                 |
| H11' | 0.9038 | 1.7734  | 0.2542 | 0.036                 |
| H12' | 0.8326 | 1.7322  | 0.3540 | 0.025                 |

**Table 4. Refined Thermal Parameters (U's) for Compound 1394**

| Atom | U <sub>11</sub> | U <sub>22</sub> | U <sub>33</sub> | U <sub>23</sub> | U <sub>13</sub> | U <sub>12</sub> |
|------|-----------------|-----------------|-----------------|-----------------|-----------------|-----------------|
| O1   | 0.0046(12)      | 0.0139(13)      | 0.0296(15)      | 0.0067(12)      | -0.0015(12)     | -0.0004(10)     |
| O2   | 0.0129(13)      | 0.0191(14)      | 0.0188(14)      | -0.0015(12)     | -0.0020(12)     | -0.0011(11)     |
| C1   | 0.0116(18)      | 0.0115(16)      | 0.0077(16)      | -0.0045(13)     | -0.0018(15)     | 0.0021(14)      |
| C2   | 0.0149(19)      | 0.0094(16)      | 0.0110(18)      | 0.0013(14)      | -0.0023(15)     | -0.0067(16)     |
| C3   | 0.013(2)        | 0.0147(18)      | 0.0152(19)      | 0.0006(15)      | 0.0029(15)      | 0.0014(15)      |
| C4   | 0.012(2)        | 0.0118(18)      | 0.0160(19)      | 0.0001(14)      | -0.0010(15)     | 0.0016(15)      |
| C5   | 0.0122(19)      | 0.0132(18)      | 0.0075(16)      | -0.0028(14)     | 0.0018(14)      | -0.0006(15)     |
| C6   | 0.017(2)        | 0.0183(19)      | 0.0117(18)      | 0.0034(15)      | -0.0030(15)     | -0.0026(16)     |
| C7   | 0.0059(18)      | 0.0141(19)      | 0.017(2)        | 0.0065(15)      | -0.0024(15)     | -0.0028(14)     |
| C8   | 0.013(2)        | 0.0200(19)      | 0.022(2)        | 0.0014(17)      | -0.0002(18)     | -0.0001(16)     |
| C9   | 0.016(2)        | 0.025(2)        | 0.022(2)        | -0.0063(18)     | -0.0016(17)     | -0.0022(17)     |
| C10  | 0.020(2)        | 0.029(2)        | 0.017(2)        | 0.0009(17)      | -0.0013(17)     | 0.0007(19)      |
| C11  | 0.018(2)        | 0.020(2)        | 0.0173(18)      | 0.0090(18)      | -0.0048(16)     | -0.0017(17)     |
| C12  | 0.0115(19)      | 0.019(2)        | 0.022(2)        | 0.0026(17)      | -0.0023(17)     | -0.0009(16)     |
| O1'  | 0.0150(14)      | 0.0204(15)      | 0.0180(14)      | 0.0086(13)      | -0.0035(12)     | -0.0053(12)     |
| O2'  | 0.0134(14)      | 0.0075(12)      | 0.0230(15)      | 0.0016(12)      | -0.0066(12)     | -0.0029(11)     |
| C1'  | 0.0119(19)      | 0.0128(17)      | 0.0118(18)      | -0.0021(15)     | 0.0005(16)      | -0.0020(15)     |
| C2'  | 0.0079(17)      | 0.0155(18)      | 0.0070(16)      | -0.0056(14)     | -0.0016(14)     | 0.0025(14)      |
| C3'  | 0.012(2)        | 0.0116(18)      | 0.0161(19)      | 0.0008(15)      | -0.0046(15)     | 0.0019(15)      |
| C4'  | 0.015(2)        | 0.0112(18)      | 0.0143(18)      | 0.0023(14)      | -0.0014(16)     | -0.0012(15)     |
| C5'  | 0.0109(18)      | 0.0171(19)      | 0.0095(18)      | 0.0009(15)      | 0.0012(14)      | -0.0052(16)     |
| C6'  | 0.0048(18)      | 0.025(2)        | 0.0154(19)      | 0.0007(16)      | -0.0025(15)     | -0.0038(15)     |
| C7'  | 0.0066(18)      | 0.0182(19)      | 0.0138(19)      | 0.0011(15)      | -0.0025(16)     | -0.0030(15)     |
| C8'  | 0.018(2)        | 0.0144(19)      | 0.026(2)        | -0.0001(17)     | -0.0036(17)     | -0.0036(17)     |
| C9'  | 0.016(2)        | 0.034(2)        | 0.030(2)        | -0.007(2)       | 0.0057(19)      | -0.0024(19)     |
| C10' | 0.029(2)        | 0.037(3)        | 0.011(2)        | -0.0002(18)     | -0.0037(18)     | -0.014(2)       |
| C11' | 0.026(2)        | 0.031(2)        | 0.024(2)        | 0.0203(19)      | -0.0025(19)     | -0.011(2)       |
| C12' | 0.011(2)        | 0.015(2)        | 0.032(2)        | 0.0052(17)      | -0.0023(18)     | 0.0007(16)      |

The form of the anisotropic displacement parameter is:

$$\exp[-2\pi(a^*U_{11}h^2+b^*U_{22}k^2+c^*U_{33}l^2+2b^*c^*U_{23}kl+2a^*c^*U_{13}hl+2a^*b^*U_{12}hk)]$$

**Table 5. Bond Distances in Compound 1394, Å**

|          |          |           |          |           |          |
|----------|----------|-----------|----------|-----------|----------|
| O1-C1    | 1.342(5) | O2-C2     | 1.221(5) | C1-C5     | 1.347(5) |
| C1-C2    | 1.461(5) | C2-C3     | 1.512(5) | C3-C4     | 1.542(5) |
| C4-C5    | 1.495(5) | C5-C6     | 1.507(6) | C6-C7     | 1.513(5) |
| C7-C8    | 1.387(6) | C7-C12    | 1.394(5) | C8-C9     | 1.382(6) |
| C9-C10   | 1.394(6) | C10-C11   | 1.373(6) | C11-C12   | 1.366(6) |
| O1'-C1'  | 1.334(5) | O2'-C2'   | 1.220(5) | C1'-C5'   | 1.346(5) |
| C1'-C2'  | 1.463(5) | C2'-C3'   | 1.492(5) | C3'-C4'   | 1.537(5) |
| C4'-C5'  | 1.505(5) | C5'-C6'   | 1.488(5) | C6'-C7'   | 1.514(6) |
| C7'-C12' | 1.379(6) | C7'-C8'   | 1.405(6) | C8'-C9'   | 1.384(6) |
| C9'-C10' | 1.389(7) | C10'-C11' | 1.373(7) | C11'-C12' | 1.412(7) |

**Table 6. Bond Angles in Compound 1394, °**

|               |          |               |          |                |          |
|---------------|----------|---------------|----------|----------------|----------|
| O1-C1-C5      | 126.7(4) | O1-C1-C2      | 122.7(3) | C5-C1-C2       | 110.7(3) |
| O2-C2-C1      | 126.3(3) | O2-C2-C3      | 126.1(4) | C1-C2-C3       | 107.6(3) |
| C2-C3-C4      | 104.9(3) | C5-C4-C3      | 104.6(3) | C1-C5-C4       | 112.0(3) |
| C1-C5-C6      | 125.0(4) | C4-C5-C6      | 123.0(3) | C5-C6-C7       | 112.5(3) |
| C8-C7-C12     | 118.4(4) | C8-C7-C6      | 120.1(3) | C12-C7-C6      | 121.4(4) |
| C9-C8-C7      | 120.2(4) | C8-C9-C10     | 120.4(4) | C11-C10-C9     | 119.2(4) |
| C12-C11-C10   | 120.5(4) | C11-C12-C7    | 121.2(4) | O1'-C1'-C5'    | 125.7(4) |
| O1'-C1'-C2'   | 123.7(3) | C5'-C1'-C2'   | 110.6(3) | O2'-C2'-C1'    | 125.2(3) |
| O2'-C2'-C3'   | 126.8(3) | C1'-C2'-C3'   | 108.0(3) | C2'-C3'-C4'    | 105.5(3) |
| C5'-C4'-C3'   | 104.4(3) | C1'-C5'-C6'   | 126.1(4) | C1'-C5'-C4'    | 111.5(3) |
| C6'-C5'-C4'   | 122.4(3) | C5'-C6'-C7'   | 112.2(3) | C12'-C7'-C8'   | 118.8(4) |
| C12'-C7'-C6'  | 121.2(4) | C8'-C7'-C6'   | 120.0(4) | C9'-C8'-C7'    | 120.2(4) |
| C8'-C9'-C10'  | 120.4(4) | C11'-C10'-C9' | 120.3(4) | C10'-C11'-C12' | 119.3(4) |
| C7'-C12'-C11' | 121.0(4) |               |          |                |          |

---

<sup>i</sup>Bruker (2009) SAINT. Bruker AXS Inc., Madison, Wisconsin, USA.

<sup>ii</sup>Bruker (2009) SHELXTL. Bruker AXS Inc., Madison, Wisconsin, USA.

<sup>iii</sup>Sheldrick, G.M. (2007) SADABS. University of Gottingen, Germany.

<sup>iv</sup>Sheldrick, G.M. (2008) Acta Cryst. A64,112-122.

<sup>v</sup>Sheldrick, G.M. (2008) Acta Cryst. A64,112-122.

<sup>vi</sup> $R1 = \sum |F_o| - |F_c| / \sum |F_o|$

$wR2 = [\sum w(F_o^2 - F_c^2)^2 / \sum w(F_o^2)]^{1/2}$

$GOF = [\sum w(F_o^2 - F_c^2)^2 / (n - p)]^{1/2}$

where n = the number of reflections and p = the number of parameters refined.

<sup>vii</sup>“ORTEP-II: A Fortran Thermal Ellipsoid Plot Program for Crystal Structure Illustrations”. C.K. Johnson (1976) ORNL-5138.

### X-ray Structure Determination of Compound 1418 (i.e., compound 32; CCDC 1427567)

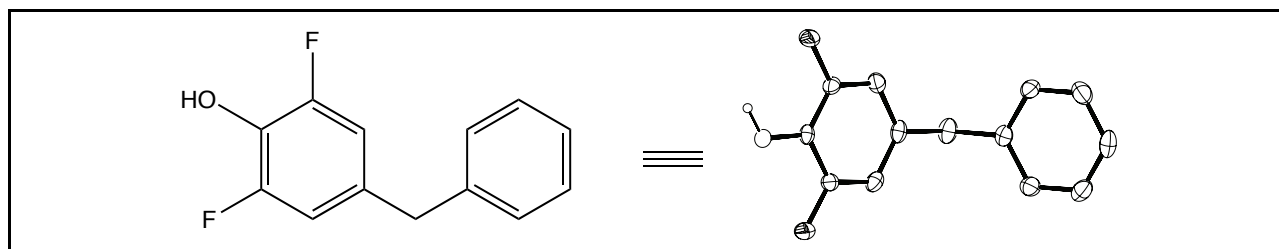

Compound 1418,  $C_{13}H_{10}OF_2$ , crystallizes in the rhombohedral space group  $R\bar{3}$  (systematic absences  $hkl: -h+k+l \neq 3n$ ) with  $a=31.0373(10)\text{\AA}$ ,  $c=5.6946(2)\text{\AA}$ ,  $V=4750.7(3)\text{\AA}^3$ ,  $Z=18$ , and  $d_{\text{calc}}=1.385\text{ g/cm}^3$ . X-ray intensity data were collected on a Bruker APEXII CCD area detector employing graphite-monochromated Mo- $K\alpha$  radiation ( $\lambda=0.71073\text{ \AA}$ ) at a temperature of 100(1)K. Preliminary indexing was performed from a series of thirty-six  $0.5^\circ$  rotation frames with exposures of 10 seconds. A total of 1985 frames were collected with a crystal to detector distance of 37.4 mm, rotation widths of  $0.5^\circ$  and exposures of 5 seconds:

| scan type | $2\theta$ | $\omega$ | $\phi$ | $\chi$ | frames |
|-----------|-----------|----------|--------|--------|--------|
| $\phi$    | -23.00    | 315.83   | 12.48  | 28.88  | 739    |
| $\omega$  | 14.50     | 282.56   | 54.11  | 21.36  | 202    |
| $\phi$    | -13.00    | 335.42   | 45.31  | 64.29  | 83     |
| $\omega$  | 4.50      | 257.23   | 231.94 | 52.47  | 222    |
| $\phi$    | -10.50    | 335.77   | 25.44  | 54.21  | 739    |

Rotation frames were integrated using SAINT<sup>i</sup>, producing a listing of unaveraged  $F^2$  and  $\sigma(F^2)$  values which were then passed to the SHELXTL<sup>ii</sup> program package for further processing and structure solution. A total of 27180 reflections were measured over the ranges  $2.27 \leq \theta \leq 25.37^\circ$ ,  $-37 \leq h \leq 37$ ,  $-37 \leq k \leq 37$ ,  $-6 \leq l \leq 6$  yielding 1926 unique reflections ( $R_{\text{int}} = 0.0556$ ). The intensity data were corrected for Lorentz and polarization effects and for absorption using SADABS<sup>iii</sup> (minimum and maximum transmission 0.6449, 0.7452).

The structure was solved by direct methods (SHELXS-97<sup>iv</sup>). Refinement was by full-matrix least squares based on  $F^2$  using SHELXL-97.<sup>v</sup> All reflections were used during refinement. The weighting scheme used was  $w=1/[\sigma^2(F_o^2) + (0.0412P)^2 + 2.5297P]$  where  $P = (F_o^2 + 2F_c^2)/3$ . Non-hydrogen atoms were refined anisotropically and hydrogen atoms were refined using a riding model. Refinement

converged to  $R1=0.0326$  and  $wR2=0.0742$  for 1449 observed reflections for which  $F > 4\sigma(F)$  and  $R1=0.0529$  and  $wR2=0.0816$  and  $GOF = 1.024$  for all 1926 unique, non-zero reflections and 147 variables.<sup>vi</sup> The maximum  $\Delta/\sigma$  in the final cycle of least squares was 0.000 and the two most prominent peaks in the final difference Fourier were  $+0.180$  and  $-0.202 \text{ e}/\text{\AA}^3$ .

Table 1. lists cell information, data collection parameters, and refinement data. Final positional and equivalent isotropic thermal parameters are given in Tables 2. and 3. Anisotropic thermal parameters are in Table 4. Tables 5. and 6. list bond distances and bond angles. Figure 1. is an ORTEP<sup>vii</sup> representation of the molecule with 50% probability thermal ellipsoids displayed.

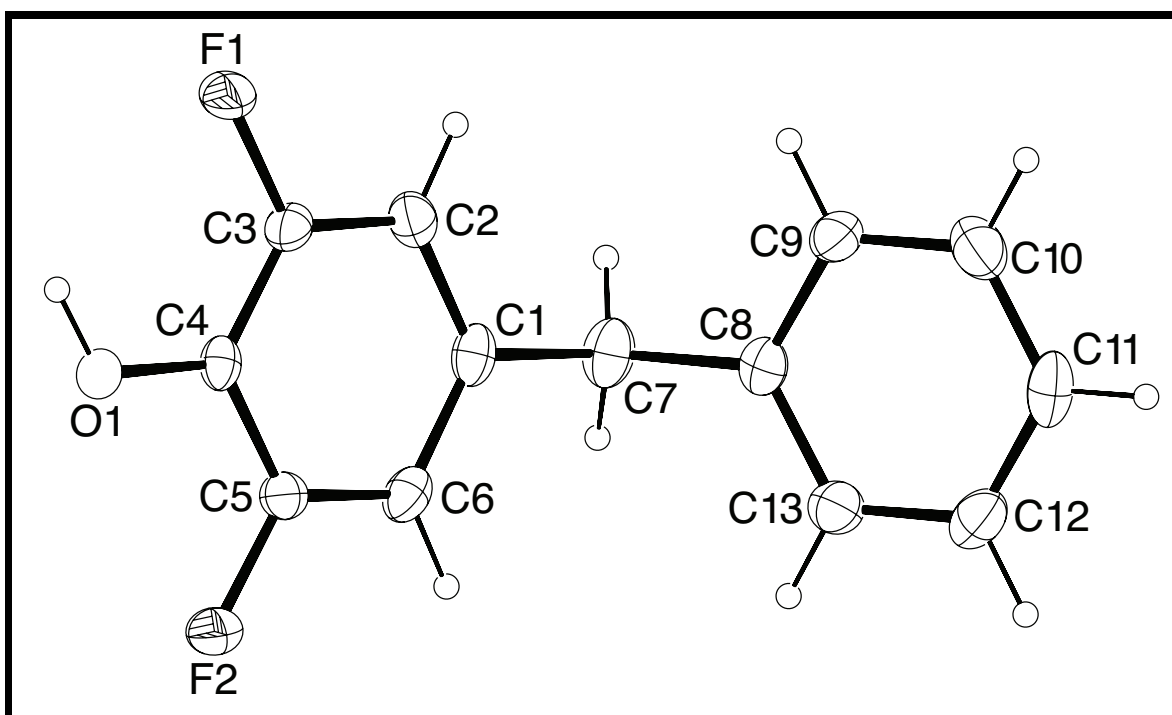

Figure 1. ORTEP drawing of the title compound with 50% probability thermal ellipsoids.

**Table 1. Summary of Structure Determination of Compound 1418**

|                                   |                                                 |
|-----------------------------------|-------------------------------------------------|
| Empirical formula                 | C <sub>13</sub> H <sub>10</sub> OF <sub>2</sub> |
| Formula weight                    | 220.21                                          |
| Temperature                       | 100(1) K                                        |
| Wavelength                        | 0.71073 Å                                       |
| Crystal system                    | rhombohedral                                    |
| Space group                       | R $\bar{3}$                                     |
| Cell constants:                   |                                                 |
| a                                 | 31.0373(10) Å                                   |
| c                                 | 5.6946(2) Å                                     |
| Volume                            | 4750.7(3) Å <sup>3</sup>                        |
| Z                                 | 18                                              |
| Density (calculated)              | 1.385 Mg/m <sup>3</sup>                         |
| Absorption coefficient            | 0.110 mm <sup>-1</sup>                          |
| F(000)                            | 2052                                            |
| Crystal size                      | 0.38 x 0.05 x 0.02 mm <sup>3</sup>              |
| Theta range for data collection   | 2.27 to 25.37°                                  |
| Index ranges                      | -37 ≤ h ≤ 37, -37 ≤ k ≤ 37, -6 ≤ l ≤ 6          |
| Reflections collected             | 27180                                           |
| Independent reflections           | 1926 [R(int) = 0.0556]                          |
| Completeness to theta = 25.37°    | 99.3 %                                          |
| Absorption correction             | Semi-empirical from equivalents                 |
| Max. and min. transmission        | 0.7452 and 0.6449                               |
| Refinement method                 | Full-matrix least-squares on F <sup>2</sup>     |
| Data / restraints / parameters    | 1926 / 0 / 147                                  |
| Goodness-of-fit on F <sup>2</sup> | 1.024                                           |
| Final R indices [I > 2σ(I)]       | R1 = 0.0326, wR2 = 0.0742                       |
| R indices (all data)              | R1 = 0.0529, wR2 = 0.0816                       |
| Largest diff. peak and hole       | 0.180 and -0.202 e.Å <sup>-3</sup>              |

**Table 2. Refined Positional Parameters for Compound 1418**

| Atom | x          | y          | z           | $U_{eq}, \text{Å}^2$ |
|------|------------|------------|-------------|----------------------|
| F1   | 0.07707(3) | 0.41425(3) | 0.69256(16) | 0.0302(3)            |
| F2   | 0.00296(3) | 0.43097(3) | 0.01192(15) | 0.0269(2)            |
| O1   | 0.02721(4) | 0.37474(3) | 0.27531(17) | 0.0201(3)            |
| C1   | 0.06892(5) | 0.51997(5) | 0.4770(3)   | 0.0211(3)            |
| C2   | 0.08062(6) | 0.49094(6) | 0.6199(3)   | 0.0225(4)            |
| C3   | 0.06645(5) | 0.44305(5) | 0.5522(3)   | 0.0202(3)            |
| C4   | 0.04108(5) | 0.42182(5) | 0.3475(3)   | 0.0174(3)            |
| C5   | 0.02992(5) | 0.45175(6) | 0.2099(2)   | 0.0190(3)            |
| C6   | 0.04327(5) | 0.49965(5) | 0.2692(3)   | 0.0218(3)            |
| C7   | 0.08309(6) | 0.57261(6) | 0.5445(3)   | 0.0269(4)            |
| C8   | 0.13307(6) | 0.61154(5) | 0.4492(3)   | 0.0201(3)            |
| C9   | 0.17642(6) | 0.62353(5) | 0.5693(3)   | 0.0255(4)            |
| C10  | 0.22217(6) | 0.65953(6) | 0.4842(3)   | 0.0309(4)            |
| C11  | 0.22533(6) | 0.68411(6) | 0.2774(3)   | 0.0299(4)            |
| C12  | 0.18244(6) | 0.67225(6) | 0.1561(3)   | 0.0284(4)            |
| C13  | 0.13676(6) | 0.63631(6) | 0.2409(3)   | 0.0250(4)            |

$U_{eq} = \frac{1}{3}[U_{11}(aa^*)^2 + U_{22}(bb^*)^2 + U_{33}(cc^*)^2 + 2U_{12}aa^*bb^*\cos\gamma + 2U_{13}aa^*cc^*\cos\beta + 2U_{23}bb^*cc^*\cos\alpha]$

**Table 3. Positional Parameters for Hydrogens in Compound 1418**

| Atom | x      | y      | z      | $U_{iso}, \text{Å}^2$ |
|------|--------|--------|--------|-----------------------|
| H1   | 0.0281 | 0.3586 | 0.3870 | 0.027                 |
| H2   | 0.0978 | 0.5037 | 0.7597 | 0.030                 |
| H6   | 0.0352 | 0.5185 | 0.1707 | 0.029                 |
| H7a  | 0.0578 | 0.5795 | 0.4869 | 0.036                 |
| H7b  | 0.0837 | 0.5751 | 0.7144 | 0.036                 |
| H9   | 0.1748 | 0.6072 | 0.7088 | 0.034                 |
| H10  | 0.2510 | 0.6672 | 0.5670 | 0.041                 |
| H11  | 0.2561 | 0.7084 | 0.2205 | 0.040                 |
| H12  | 0.1842 | 0.6885 | 0.0163 | 0.038                 |
| H13  | 0.1081 | 0.6286 | 0.1572 | 0.033                 |



**Table 4. Refined Thermal Parameters (U's) for Compound 1418**

| Atom | U <sub>11</sub> | U <sub>22</sub> | U <sub>33</sub> | U <sub>23</sub> | U <sub>13</sub> | U <sub>12</sub> |
|------|-----------------|-----------------|-----------------|-----------------|-----------------|-----------------|
| F1   | 0.0339(5)       | 0.0214(5)       | 0.0346(5)       | 0.0003(4)       | -0.0159(4)      | 0.0134(4)       |
| F2   | 0.0312(5)       | 0.0239(5)       | 0.0248(5)       | 0.0013(4)       | -0.0077(4)      | 0.0132(4)       |
| O1   | 0.0209(6)       | 0.0150(5)       | 0.0244(6)       | 0.0013(4)       | -0.0026(4)      | 0.0089(5)       |
| C1   | 0.0156(8)       | 0.0180(8)       | 0.0280(8)       | 0.0029(6)       | 0.0082(7)       | 0.0071(6)       |
| C2   | 0.0194(8)       | 0.0208(8)       | 0.0229(9)       | -0.0015(7)      | 0.0007(6)       | 0.0068(7)       |
| C3   | 0.0170(8)       | 0.0198(8)       | 0.0246(8)       | 0.0050(6)       | -0.0009(6)      | 0.0098(7)       |
| C4   | 0.0129(7)       | 0.0146(7)       | 0.0241(8)       | 0.0013(6)       | 0.0034(6)       | 0.0065(6)       |
| C5   | 0.0151(8)       | 0.0220(8)       | 0.0185(8)       | 0.0022(6)       | 0.0012(6)       | 0.0082(6)       |
| C6   | 0.0199(8)       | 0.0199(8)       | 0.0276(9)       | 0.0068(7)       | 0.0042(7)       | 0.0114(7)       |
| C7   | 0.0279(9)       | 0.0197(8)       | 0.0334(9)       | 0.0000(7)       | 0.0075(7)       | 0.0121(7)       |
| C8   | 0.0245(8)       | 0.0151(8)       | 0.0230(8)       | -0.0030(6)      | 0.0027(6)       | 0.0117(7)       |
| C9   | 0.0330(9)       | 0.0198(8)       | 0.0221(8)       | 0.0017(7)       | -0.0032(7)      | 0.0119(7)       |
| C10  | 0.0248(9)       | 0.0258(9)       | 0.0395(10)      | -0.0041(8)      | -0.0078(8)      | 0.0108(8)       |
| C11  | 0.0292(9)       | 0.0164(8)       | 0.0375(10)      | -0.0005(7)      | 0.0094(8)       | 0.0064(7)       |
| C12  | 0.0406(10)      | 0.0216(9)       | 0.0230(9)       | 0.0026(7)       | 0.0039(7)       | 0.0156(8)       |
| C13  | 0.0290(9)       | 0.0219(8)       | 0.0262(9)       | -0.0019(7)      | -0.0048(7)      | 0.0143(7)       |

The form of the anisotropic displacement parameter is:  
 $\exp[-2\pi(a^2U_{11}h^2+b^2U_{22}k^2+c^2U_{33}l^2+2b^*c^*U_{23}kl+2a^*c^*U_{13}hl+2a^*b^*U_{12}hk)]$

**Table 5. Bond Distances in Compound 1418, Å**

|         |            |         |            |         |            |
|---------|------------|---------|------------|---------|------------|
| F1-C3   | 1.3569(16) | F2-C5   | 1.3593(17) | O1-C4   | 1.3640(17) |
| C1-C6   | 1.389(2)   | C1-C2   | 1.390(2)   | C1-C7   | 1.514(2)   |
| C2-C3   | 1.377(2)   | C3-C4   | 1.376(2)   | C4-C5   | 1.385(2)   |
| C5-C6   | 1.371(2)   | C7-C8   | 1.512(2)   | C8-C9   | 1.384(2)   |
| C8-C13  | 1.387(2)   | C9-C10  | 1.383(2)   | C10-C11 | 1.380(2)   |
| C11-C12 | 1.376(2)   | C12-C13 | 1.381(2)   |         |            |

**Table 6. Bond Angles in Compound 1418, °**

|             |            |            |            |             |            |
|-------------|------------|------------|------------|-------------|------------|
| C6-C1-C2    | 118.71(14) | C6-C1-C7   | 119.84(14) | C2-C1-C7    | 121.46(14) |
| C3-C2-C1    | 119.32(14) | F1-C3-C4   | 116.93(13) | F1-C3-C2    | 119.64(13) |
| C4-C3-C2    | 123.43(14) | O1-C4-C3   | 124.51(13) | O1-C4-C5    | 119.82(13) |
| C3-C4-C5    | 115.67(13) | F2-C5-C6   | 119.95(13) | F2-C5-C4    | 116.87(13) |
| C6-C5-C4    | 123.13(14) | C5-C6-C1   | 119.74(14) | C8-C7-C1    | 113.55(12) |
| C9-C8-C13   | 118.28(14) | C9-C8-C7   | 120.57(14) | C13-C8-C7   | 121.14(14) |
| C10-C9-C8   | 120.78(15) | C11-C10-C9 | 120.39(15) | C12-C11-C10 | 119.24(15) |
| C11-C12-C13 | 120.39(15) | C12-C13-C8 | 120.92(15) |             |            |

---

<sup>i</sup>Bruker (2009) SAINT. Bruker AXS Inc., Madison, Wisconsin, USA.

<sup>ii</sup>Bruker (2009) SHELXTL. Bruker AXS Inc., Madison, Wisconsin, USA.

<sup>iii</sup>Sheldrick, G.M. (2007) SADABS. University of Gottingen, Germany.

<sup>iv</sup>Sheldrick, G.M. (2008) Acta Cryst. A64,112-122.

<sup>v</sup>Sheldrick, G.M. (2008) Acta Cryst. A64,112-122.

<sup>vi</sup> $R1 = \sum |F_o| - |F_c| / \sum |F_o|$

$wR2 = [\sum w(F_o^2 - F_c^2)^2 / \sum w(F_o^2)]^{1/2}$

$GOF = [\sum w(F_o^2 - F_c^2)^2 / (n - p)]^{1/2}$

where n = the number of reflections and p = the number of parameters refined.

<sup>vii</sup>“ORTEP-II: A Fortran Thermal Ellipsoid Plot Program for Crystal Structure Illustrations”. C.K. Johnson (1976) ORNL-5138.

### X-ray Structure Determination of Compound 1402 (i.e., compound 35; CCDC 1427585)

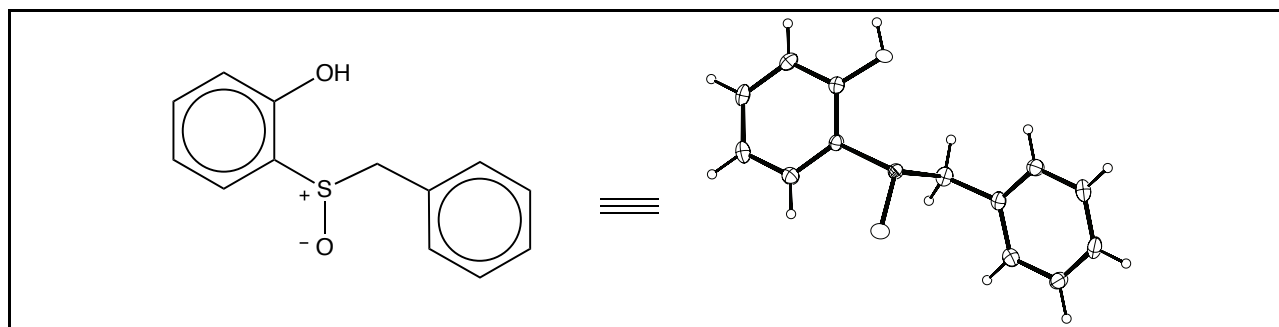

Compound 1402,  $C_{13}H_{12}SO_2$ , crystallizes in the triclinic space group  $P\bar{1}$  with  $a=8.0531(3)\text{\AA}$ ,  $b=11.5643(4)\text{\AA}$ ,  $c=12.4184(5)\text{\AA}$ ,  $\alpha=78.745(2)^\circ$ ,  $\beta=88.129(2)^\circ$ ,  $\gamma=85.001(2)^\circ$ ,  $V=1129.81(7)\text{\AA}^3$ ,  $Z=4$ , and  $d_{\text{calc}}=1.366\text{ g/cm}^3$ . X-ray intensity data were collected on a Bruker APEXII CCD area detector employing graphite-monochromated Mo-K $\alpha$  radiation ( $\lambda=0.71073\text{ \AA}$ ) at a temperature of 100(1)K. Preliminary indexing was performed from a series of thirty-six  $0.5^\circ$  rotation frames with exposures of 10 seconds. A total of 3074 frames were collected with a crystal to detector distance of 37.4 mm, rotation widths of  $0.5^\circ$  and exposures of 15 seconds:

| scan type | $2\theta$ | $\omega$ | $\phi$ | $\chi$ | frames |
|-----------|-----------|----------|--------|--------|--------|
| $\phi$    | -23.00    | 315.83   | 12.48  | 28.88  | 739    |
| $\omega$  | -23.00    | 333.49   | 158.99 | -70.01 | 69     |
| $\phi$    | -15.50    | 258.48   | 38.15  | 19.46  | 646    |
| $\phi$    | -23.00    | 334.21   | 38.95  | 73.66  | 739    |
| $\phi$    | 19.50     | 59.55    | 348.71 | -26.26 | 739    |
| $\phi$    | 12.00     | 23.21    | 59.30  | -99.82 | 142    |

Rotation frames were integrated using SAINT<sup>i</sup>, producing a listing of unaveraged  $F^2$  and  $\sigma(F^2)$  values which were then passed to the SHELXTL<sup>ii</sup> program package for further processing and structure solution. A total of 22708 reflections were measured over the ranges  $1.67 \leq \theta \leq 25.47^\circ$ ,  $-9 \leq h \leq 9$ ,  $-13 \leq k \leq 13$ ,  $-15 \leq l \leq 14$  yielding 3976 unique reflections ( $R_{\text{int}} = 0.0222$ ). The intensity data were corrected for Lorentz and polarization effects and for absorption using SADABS<sup>iii</sup> (minimum and maximum transmission 0.7070, 0.7452).

The structure was solved by direct methods (SHELXS-97<sup>iv</sup>). Refinement was by full-matrix least squares based on  $F^2$  using SHELXL-97.<sup>v</sup> All reflections were used during refinement. The weighting

scheme used was  $w=1/[\sigma^2(F_o^2) + (0.0480P)^2 + 0.5872P]$  where  $P = (F_o^2 + 2F_c^2)/3$ . Non-hydrogen atoms were refined anisotropically and hydrogen atoms were refined using a riding model. Refinement converged to  $R1=0.0287$  and  $wR2=0.0779$  for 3520 observed reflections for which  $F > 4\sigma(F)$  and  $R1=0.0349$  and  $wR2=0.0916$  and  $GOF = 1.125$  for all 3976 unique, non-zero reflections and 292 variables.<sup>vi</sup> The maximum  $\Delta/\sigma$  in the final cycle of least squares was 0.000 and the two most prominent peaks in the final difference Fourier were  $+0.453$  and  $-0.285 \text{ e}/\text{\AA}^3$ .

Table 1. lists cell information, data collection parameters, and refinement data. Final positional and equivalent isotropic thermal parameters are given in Tables 2. and 3. Anisotropic thermal parameters are in Table 4. Tables 5. and 6. list bond distances and bond angles. Figures 1. and 2. are ORTEP<sup>vii</sup> representations of the molecule with 50% probability thermal ellipsoids displayed.

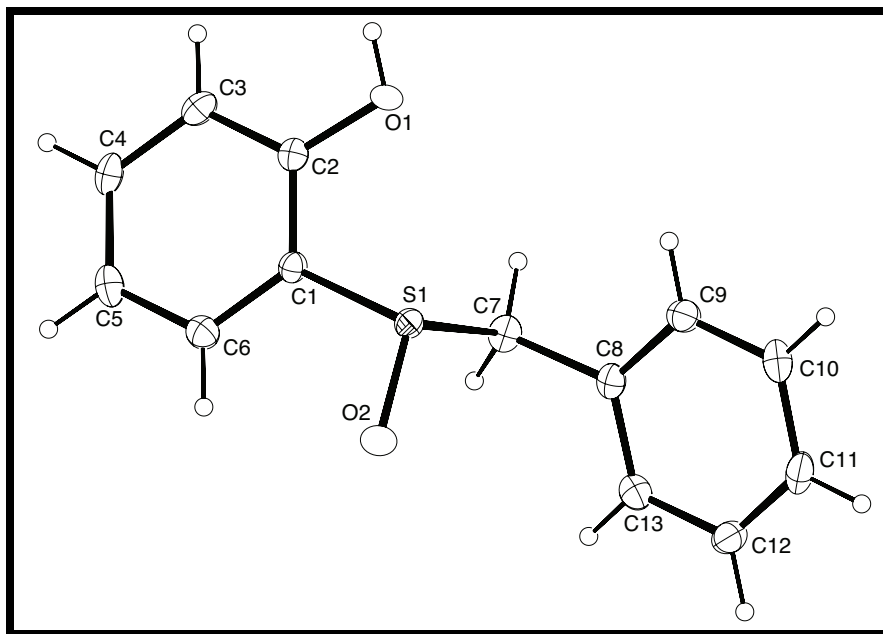

Figure 1. ORTEP drawing of molecule no. 1 of the asymmetric unit with 50% probability thermal ellipsoids.

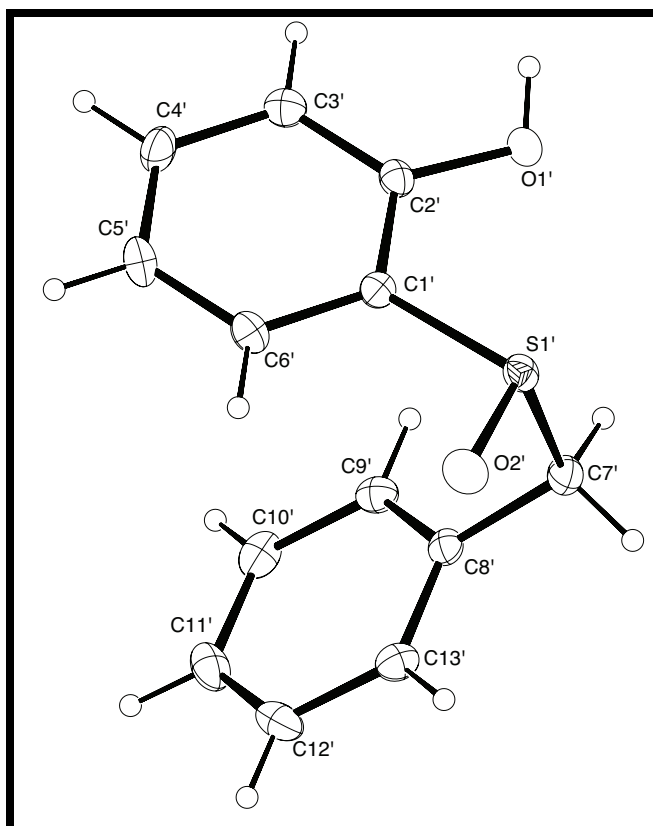

Figure 2. ORTEP drawing of molecule no. 2 of the asymmetric unit with 50% probability thermal ellipsoids.

**Table 1. Summary of Structure Determination of Compound 1402**

|                                   |                                                 |
|-----------------------------------|-------------------------------------------------|
| Empirical formula                 | C <sub>13</sub> H <sub>12</sub> SO <sub>2</sub> |
| Formula weight                    | 232.29                                          |
| Temperature                       | 100(1) K                                        |
| Wavelength                        | 0.71073 Å                                       |
| Crystal system                    | triclinic                                       |
| Space group                       | P $\bar{1}$                                     |
| Cell constants:                   |                                                 |
| a                                 | 8.0531(3) Å                                     |
| b                                 | 11.5643(4) Å                                    |
| c                                 | 12.4184(5) Å                                    |
| $\alpha$                          | 78.745(2)°                                      |
| $\beta$                           | 88.129(2)°                                      |
| $\gamma$                          | 85.001(2)°                                      |
| Volume                            | 1129.81(7) Å <sup>3</sup>                       |
| Z                                 | 4                                               |
| Density (calculated)              | 1.366 Mg/m <sup>3</sup>                         |
| Absorption coefficient            | 0.267 mm <sup>-1</sup>                          |
| F(000)                            | 488                                             |
| Crystal size                      | 0.32 x 0.18 x 0.04 mm <sup>3</sup>              |
| Theta range for data collection   | 1.67 to 25.47°                                  |
| Index ranges                      | -9 ≤ h ≤ 9, -13 ≤ k ≤ 13, -15 ≤ l ≤ 14          |
| Reflections collected             | 22708                                           |
| Independent reflections           | 3976 [R(int) = 0.0222]                          |
| Completeness to theta = 25.47°    | 94.7 %                                          |
| Absorption correction             | Semi-empirical from equivalents                 |
| Max. and min. transmission        | 0.7452 and 0.7070                               |
| Refinement method                 | Full-matrix least-squares on F <sup>2</sup>     |
| Data / restraints / parameters    | 3976 / 0 / 292                                  |
| Goodness-of-fit on F <sup>2</sup> | 1.125                                           |
| Final R indices [I > 2σ(I)]       | R1 = 0.0287, wR2 = 0.0779                       |
| R indices (all data)              | R1 = 0.0349, wR2 = 0.0916                       |
| Largest diff. peak and hole       | 0.453 and -0.285 e.Å <sup>-3</sup>              |

Table 2. Refined Positional Parameters for Compound 1402

| Atom | x           | y            | z            | $U_{eq}, \text{Å}^2$ |
|------|-------------|--------------|--------------|----------------------|
| C1   | 0.2110(2)   | 0.39951(15)  | 0.50171(14)  | 0.0136(4)            |
| C2   | 0.1651(2)   | 0.38328(15)  | 0.61258(15)  | 0.0147(4)            |
| C3   | 0.1848(2)   | 0.47441(16)  | 0.66878(15)  | 0.0183(4)            |
| C4   | 0.2478(2)   | 0.57718(16)  | 0.61433(16)  | 0.0196(4)            |
| C5   | 0.2930(2)   | 0.59263(16)  | 0.50397(16)  | 0.0206(4)            |
| C6   | 0.2727(2)   | 0.50259(15)  | 0.44717(15)  | 0.0183(4)            |
| C7   | 0.3475(2)   | 0.18013(15)  | 0.47531(15)  | 0.0171(4)            |
| C8   | 0.3375(2)   | 0.07571(15)  | 0.42089(14)  | 0.0149(4)            |
| C9   | 0.2221(2)   | -0.00642(15) | 0.45790(15)  | 0.0175(4)            |
| C10  | 0.2023(2)   | -0.09771(15) | 0.40274(16)  | 0.0200(4)            |
| C11  | 0.2987(2)   | -0.10740(16) | 0.30937(16)  | 0.0210(4)            |
| C12  | 0.4154(2)   | -0.02772(16) | 0.27370(15)  | 0.0213(4)            |
| C13  | 0.4358(2)   | 0.06351(15)  | 0.32901(15)  | 0.0182(4)            |
| O1   | 0.10710(15) | 0.27789(10)  | 0.65948(10)  | 0.0179(3)            |
| O2   | 0.21160(15) | 0.33615(11)  | 0.30988(10)  | 0.0181(3)            |
| S1   | 0.17175(5)  | 0.28697(4)   | 0.42857(3)   | 0.01379(12)          |
| C1'  | 0.90795(19) | 0.23026(15)  | 0.04019(14)  | 0.0129(3)            |
| C2'  | 0.9485(2)   | 0.24599(15)  | 0.14452(15)  | 0.0137(4)            |
| C3'  | 0.9366(2)   | 0.15296(16)  | 0.23320(15)  | 0.0185(4)            |
| C4'  | 0.8836(2)   | 0.04699(16)  | 0.21725(16)  | 0.0199(4)            |
| C5'  | 0.8404(2)   | 0.03265(16)  | 0.11388(16)  | 0.0203(4)            |
| C6'  | 0.8526(2)   | 0.12413(15)  | 0.02488(15)  | 0.0161(4)            |
| C7'  | 0.7455(2)   | 0.44069(15)  | -0.06025(15) | 0.0163(4)            |
| C8'  | 0.5954(2)   | 0.37084(14)  | -0.04379(15) | 0.0139(4)            |
| C9'  | 0.5313(2)   | 0.33321(15)  | 0.06106(15)  | 0.0159(4)            |
| C10' | 0.4006(2)   | 0.26052(16)  | 0.07796(16)  | 0.0186(4)            |
| C11' | 0.3353(2)   | 0.22388(16)  | -0.01040(17) | 0.0207(4)            |
| C12' | 0.3966(2)   | 0.26287(16)  | -0.11567(16) | 0.0201(4)            |
| C13' | 0.5253(2)   | 0.33658(16)  | -0.13246(15) | 0.0172(4)            |
| O1'  | 0.99540(15) | 0.35390(10)  | 0.15281(10)  | 0.0181(3)            |
| O2'  | 0.90922(15) | 0.29307(11)  | -0.17353(10) | 0.0194(3)            |
| S1'  | 0.93626(5)  | 0.34641(4)   | -0.07409(3)  | 0.01409(12)          |

$U_{eq} = \frac{1}{3}[U_{11}(aa^*)^2 + U_{22}(bb^*)^2 + U_{33}(cc^*)^2 + 2U_{12}aa^*bb^*\cos\gamma + 2U_{13}aa^*cc^*\cos\beta + 2U_{23}bb^*cc^*\cos\alpha]$

**Table 3. Positional Parameters for Hydrogens in Compound 1402**

| Atom | x      | y       | z       | $U_{iso}, \text{Å}^2$ |
|------|--------|---------|---------|-----------------------|
| H3   | 0.1553 | 0.4658  | 0.7428  | 0.024                 |
| H4   | 0.2604 | 0.6375  | 0.6524  | 0.026                 |
| H5   | 0.3362 | 0.6623  | 0.4685  | 0.027                 |
| H6   | 0.3006 | 0.5120  | 0.3729  | 0.024                 |
| H7a  | 0.4518 | 0.2156  | 0.4556  | 0.023                 |
| H7b  | 0.3422 | 0.1552  | 0.5545  | 0.023                 |
| H9   | 0.1575 | -0.0002 | 0.5203  | 0.023                 |
| H10  | 0.1247 | -0.1522 | 0.4281  | 0.027                 |
| H11  | 0.2842 | -0.1674 | 0.2713  | 0.028                 |
| H12  | 0.4813 | -0.0350 | 0.2121  | 0.028                 |
| H13  | 0.5155 | 0.1166  | 0.3044  | 0.024                 |
| H1   | 0.0553 | 0.2848  | 0.7161  | 0.027                 |
| H3'  | 0.9641 | 0.1619  | 0.3031  | 0.025                 |
| H4'  | 0.8770 | -0.0154 | 0.2767  | 0.026                 |
| H5'  | 0.8031 | -0.0386 | 0.1045  | 0.027                 |
| H6'  | 0.8241 | 0.1149  | -0.0447 | 0.021                 |
| H7a' | 0.7551 | 0.4791  | 0.0018  | 0.022                 |
| H7b' | 0.7317 | 0.5018  | -0.1258 | 0.022                 |
| H9'  | 0.5762 | 0.3569  | 0.1205  | 0.021                 |
| H10' | 0.3571 | 0.2366  | 0.1483  | 0.025                 |
| H11' | 0.2503 | 0.1731  | 0.0009  | 0.028                 |
| H12' | 0.3511 | 0.2395  | -0.1751 | 0.027                 |
| H13' | 0.5651 | 0.3633  | -0.2033 | 0.023                 |
| H1'  | 1.0523 | 0.3475  | 0.2076  | 0.027                 |



**Table 4. Refined Thermal Parameters (U's) for Compound 1402**

| Atom | U <sub>11</sub> | U <sub>22</sub> | U <sub>33</sub> | U <sub>23</sub> | U <sub>13</sub> | U <sub>12</sub> |
|------|-----------------|-----------------|-----------------|-----------------|-----------------|-----------------|
| C1   | 0.0143(8)       | 0.0130(8)       | 0.0141(9)       | -0.0037(7)      | -0.0017(7)      | -0.0011(6)      |
| C2   | 0.0127(8)       | 0.0146(8)       | 0.0170(9)       | -0.0036(7)      | -0.0014(7)      | -0.0004(6)      |
| C3   | 0.0193(9)       | 0.0208(9)       | 0.0167(9)       | -0.0084(8)      | -0.0014(7)      | -0.0003(7)      |
| C4   | 0.0218(9)       | 0.0140(8)       | 0.0252(10)      | -0.0089(8)      | -0.0042(8)      | -0.0011(7)      |
| C5   | 0.0214(9)       | 0.0129(8)       | 0.0275(11)      | -0.0029(8)      | -0.0021(8)      | -0.0037(7)      |
| C6   | 0.0206(9)       | 0.0172(9)       | 0.0167(9)       | -0.0021(8)      | -0.0004(7)      | -0.0017(7)      |
| C7   | 0.0155(8)       | 0.0177(9)       | 0.0187(9)       | -0.0047(8)      | -0.0047(7)      | 0.0003(7)       |
| C8   | 0.0151(8)       | 0.0132(8)       | 0.0160(9)       | -0.0025(7)      | -0.0053(7)      | 0.0019(7)       |
| C9   | 0.0168(8)       | 0.0177(9)       | 0.0169(9)       | -0.0020(8)      | 0.0006(7)       | 0.0005(7)       |
| C10  | 0.0186(9)       | 0.0131(8)       | 0.0280(11)      | -0.0028(8)      | -0.0037(8)      | -0.0012(7)      |
| C11  | 0.0274(10)      | 0.0131(8)       | 0.0233(10)      | -0.0065(8)      | -0.0057(8)      | 0.0018(7)       |
| C12  | 0.0266(10)      | 0.0199(9)       | 0.0166(10)      | -0.0043(8)      | 0.0020(8)       | 0.0030(8)       |
| C13  | 0.0176(8)       | 0.0161(9)       | 0.0200(10)      | -0.0012(8)      | -0.0006(7)      | -0.0016(7)      |
| O1   | 0.0249(7)       | 0.0167(6)       | 0.0129(6)       | -0.0034(5)      | 0.0066(5)       | -0.0076(5)      |
| O2   | 0.0219(6)       | 0.0207(6)       | 0.0121(6)       | -0.0033(5)      | -0.0004(5)      | -0.0047(5)      |
| S1   | 0.0159(2)       | 0.0138(2)       | 0.0125(2)       | -0.00386(17)    | -0.00119(16)    | -0.00247(16)    |
| C1'  | 0.0100(7)       | 0.0143(8)       | 0.0138(9)       | -0.0019(7)      | 0.0020(6)       | -0.0008(6)      |
| C2'  | 0.0110(7)       | 0.0131(8)       | 0.0175(9)       | -0.0039(7)      | 0.0006(7)       | -0.0011(6)      |
| C3'  | 0.0196(9)       | 0.0197(9)       | 0.0164(9)       | -0.0032(8)      | -0.0027(7)      | -0.0026(7)      |
| C4'  | 0.0218(9)       | 0.0160(9)       | 0.0196(10)      | 0.0032(8)       | 0.0014(8)       | -0.0045(7)      |
| C5'  | 0.0231(9)       | 0.0143(9)       | 0.0251(11)      | -0.0053(8)      | 0.0016(8)       | -0.0070(7)      |
| C6'  | 0.0160(8)       | 0.0171(9)       | 0.0169(9)       | -0.0063(8)      | 0.0016(7)       | -0.0038(7)      |
| C7'  | 0.0154(8)       | 0.0132(8)       | 0.0198(9)       | -0.0024(7)      | -0.0011(7)      | -0.0010(7)      |
| C8'  | 0.0115(8)       | 0.0112(8)       | 0.0184(9)       | -0.0023(7)      | -0.0005(7)      | 0.0015(6)       |
| C9'  | 0.0158(8)       | 0.0165(8)       | 0.0156(9)       | -0.0049(7)      | -0.0019(7)      | 0.0026(7)       |
| C10' | 0.0157(8)       | 0.0177(9)       | 0.0201(10)      | -0.0001(8)      | 0.0054(7)       | 0.0022(7)       |
| C11' | 0.0116(8)       | 0.0169(9)       | 0.0347(12)      | -0.0079(8)      | 0.0015(8)       | -0.0014(7)      |
| C12' | 0.0147(8)       | 0.0234(9)       | 0.0249(10)      | -0.0106(8)      | -0.0039(7)      | -0.0008(7)      |
| C13' | 0.0161(8)       | 0.0197(9)       | 0.0146(9)       | -0.0015(8)      | -0.0002(7)      | 0.0003(7)       |
| O1'  | 0.0242(7)       | 0.0140(6)       | 0.0174(7)       | -0.0033(5)      | -0.0056(5)      | -0.0055(5)      |
| O2'  | 0.0206(6)       | 0.0247(7)       | 0.0143(7)       | -0.0061(6)      | 0.0030(5)       | -0.0049(5)      |
| S1'  | 0.0128(2)       | 0.0155(2)       | 0.0141(2)       | -0.00243(18)    | 0.00136(16)     | -0.00349(16)    |

The form of the anisotropic displacement parameter is:

$$\exp[-2\pi(a^2U_{11}h^2+b^2U_{22}k^2+c^2U_{33}l^2+2b^*c^*U_{23}kl+2a^*c^*U_{13}hl+2a^*b^*U_{12}hk)]$$

**Table 5. Bond Distances in Compound 1402, Å**

|           |            |           |            |           |            |
|-----------|------------|-----------|------------|-----------|------------|
| C1-C6     | 1.376(3)   | C1-C2     | 1.395(2)   | C1-S1     | 1.7805(16) |
| C2-O1     | 1.359(2)   | C2-C3     | 1.395(2)   | C3-C4     | 1.377(3)   |
| C4-C5     | 1.388(3)   | C5-C6     | 1.390(2)   | C7-C8     | 1.504(2)   |
| C7-S1     | 1.8265(17) | C8-C9     | 1.390(3)   | C8-C13    | 1.390(3)   |
| C9-C10    | 1.389(2)   | C10-C11   | 1.392(3)   | C11-C12   | 1.376(3)   |
| C12-C13   | 1.390(2)   | O2-S1     | 1.5076(13) | C1'-C6'   | 1.390(2)   |
| C1'-C2'   | 1.396(2)   | C1'-S1'   | 1.7772(18) | C2'-O1'   | 1.358(2)   |
| C2'-C3'   | 1.389(3)   | C3'-C4'   | 1.384(2)   | C4'-C5'   | 1.385(3)   |
| C5'-C6'   | 1.380(3)   | C7'-C8'   | 1.498(2)   | C7'-S1'   | 1.8283(17) |
| C8'-C9'   | 1.388(3)   | C8'-C13'  | 1.392(2)   | C9'-C10'  | 1.389(3)   |
| C10'-C11' | 1.385(3)   | C11'-C12' | 1.386(3)   | C12'-C13' | 1.384(3)   |
| O2'-S1'   | 1.5138(12) |           |            |           |            |

**Table 6. Bond Angles in Compound 1402, °**

|                |            |               |            |                |            |
|----------------|------------|---------------|------------|----------------|------------|
| C6-C1-C2       | 121.78(15) | C6-C1-S1      | 120.12(13) | C2-C1-S1       | 117.91(13) |
| O1-C2-C1       | 117.43(14) | O1-C2-C3      | 124.18(16) | C1-C2-C3       | 118.37(16) |
| C4-C3-C2       | 119.80(17) | C3-C4-C5      | 121.45(16) | C4-C5-C6       | 119.12(18) |
| C1-C6-C5       | 119.48(17) | C8-C7-S1      | 107.78(11) | C9-C8-C13      | 118.93(15) |
| C9-C8-C7       | 120.22(16) | C13-C8-C7     | 120.74(16) | C10-C9-C8      | 120.71(17) |
| C9-C10-C11     | 119.83(17) | C12-C11-C10   | 119.67(16) | C11-C12-C13    | 120.56(17) |
| C12-C13-C8     | 120.28(17) | O2-S1-C1      | 105.66(8)  | O2-S1-C7       | 104.95(8)  |
| C1-S1-C7       | 99.40(7)   | C6'-C1'-C2'   | 120.85(17) | C6'-C1'-S1'    | 120.33(13) |
| C2'-C1'-S1'    | 118.77(13) | O1'-C2'-C3'   | 123.88(15) | O1'-C2'-C1'    | 117.03(16) |
| C3'-C2'-C1'    | 119.09(15) | C4'-C3'-C2'   | 119.80(16) | C3'-C4'-C5'    | 120.86(18) |
| C6'-C5'-C4'    | 119.95(16) | C5'-C6'-C1'   | 119.43(16) | C8'-C7'-S1'    | 111.51(11) |
| C9'-C8'-C13'   | 119.22(16) | C9'-C8'-C7'   | 120.22(15) | C13'-C8'-C7'   | 120.44(16) |
| C8'-C9'-C10'   | 120.57(16) | C11'-C10'-C9' | 119.70(18) | C10'-C11'-C12' | 120.06(17) |
| C13'-C12'-C11' | 120.09(16) | C12'-C13'-C8' | 120.30(18) | O2'-S1'-C1'    | 104.74(8)  |
| O2'-S1'-C7'    | 104.89(7)  | C1'-S1'-C7'   | 99.34(8)   |                |            |

---

<sup>i</sup>Bruker (2009) SAINT. Bruker AXS Inc., Madison, Wisconsin, USA.

<sup>ii</sup>Bruker (2009) SHELXTL. Bruker AXS Inc., Madison, Wisconsin, USA.

<sup>iii</sup>Sheldrick, G.M. (2007) SADABS. University of Gottingen, Germany.

<sup>iv</sup>Sheldrick, G.M. (2008) Acta Cryst. A64,112-122.

<sup>v</sup>Sheldrick, G.M. (2008) Acta Cryst. A64,112-122.

<sup>vi</sup> $R1 = \sum |F_o| - |F_c| / \sum |F_o|$

$wR2 = [\sum w(F_o^2 - F_c^2)^2 / \sum w(F_o^2)]^{1/2}$

$GOF = [\sum w(F_o^2 - F_c^2)^2 / (n - p)]^{1/2}$

where n = the number of reflections and p = the number of parameters refined.

<sup>vii</sup>“ORTEP-II: A Fortran Thermal Ellipsoid Plot Program for Crystal Structure Illustrations”. C.K. Johnson (1976) ORNL-5138.

### X-ray Structure Determination of Compound 1399 (i.e., compound 36; CCDC 1427787)

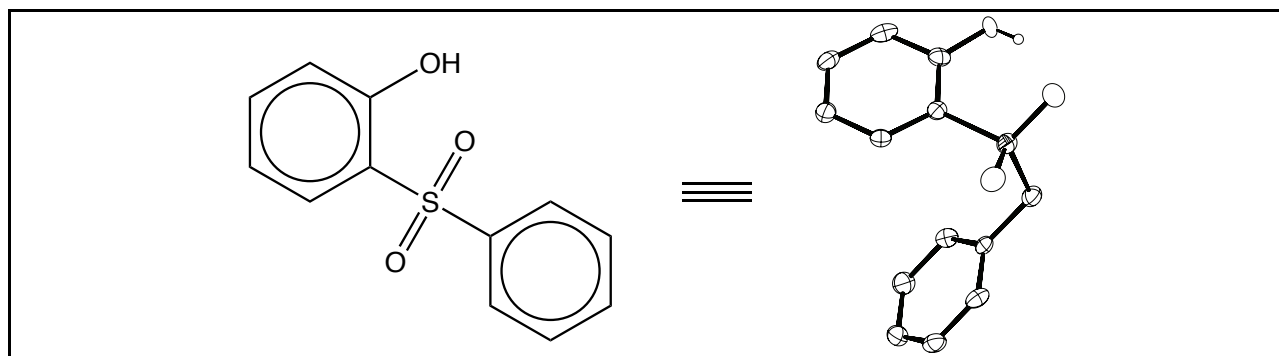

Compound 1399,  $C_{13}H_{12}SO_3$ , crystallizes in the orthorhombic space group  $Pna2_1$  (systematic absences  $h0l$ :  $h=\text{odd}$  and  $0kl$ :  $k+l=\text{odd}$ ) with  $a=16.3047(8)\text{\AA}$ ,  $b=12.4349(7)\text{\AA}$ ,  $c=5.5879(3)\text{\AA}$ ,  $V=1132.93(10)\text{\AA}^3$ ,  $Z=4$ , and  $d_{\text{calc}}=1.456\text{ g/cm}^3$ . X-ray intensity data were collected on a Bruker APEXII CCD area detector employing graphite-monochromated Mo- $K\alpha$  radiation ( $\lambda=0.71073\text{ \AA}$ ) at a temperature of  $100(1)\text{K}$ . Preliminary indexing was performed from a series of thirty-six  $0.5^\circ$  rotation frames with exposures of 10 seconds. A total of 1150 frames were collected with a crystal to detector distance of 37.5 mm, rotation widths of  $0.5^\circ$  and exposures of 10 seconds:

| scan type | $2\theta$ | $\omega$ | $\phi$ | $\chi$ | frames |
|-----------|-----------|----------|--------|--------|--------|
| $\phi$    | -23.00    | 315.83   | 12.48  | 28.88  | 739    |
| $\omega$  | -20.50    | 356.88   | 178.64 | -31.86 | 139    |
| $\phi$    | -23.00    | 334.21   | 38.95  | 73.66  | 272    |

Rotation frames were integrated using SAINT<sup>i</sup>, producing a listing of unaveraged  $F^2$  and  $\sigma(F^2)$  values which were then passed to the SHELXTL<sup>ii</sup> program package for further processing and structure solution. A total of 1156 reflections were measured over the ranges  $2.06 \leq \theta \leq 25.38^\circ$ ,  $-19 \leq h \leq 17$ ,  $-14 \leq k \leq 14$ ,  $-6 \leq l \leq 6$  yielding 1156 unique reflections ( $R_{\text{int}} = 0.0000$ ). The intensity data were corrected for Lorentz and polarization effects and for absorption using SADABS<sup>iii</sup> (minimum and maximum transmission 0.6760, 0.7452).

The structure was solved by direct methods (SHELXS-97<sup>iv</sup>). Refinement was by full-matrix least squares based on  $F^2$  using SHELXL-97.<sup>v</sup> All reflections were used during refinement. The weighting scheme used was  $w=1/[\sigma^2(F_o^2) + (0.0276P)^2 + 0.3561P]$  where  $P = (F_o^2 + 2F_c^2)/3$ . Non-hydrogen atoms

were refined anisotropically and hydrogen atoms were refined using a riding model. Refinement converged to  $R1=0.0293$  and  $wR2=0.0675$  for 1052 observed reflections for which  $F > 4\sigma(F)$  and  $R1=0.0353$  and  $wR2=0.0702$  and  $GOF = 1.076$  for all 1156 unique, non-zero reflections and 166 variables.<sup>vi</sup> The maximum  $\Delta/\sigma$  in the final cycle of least squares was 0.001 and the two most prominent peaks in the final difference Fourier were  $+0.174$  and  $-0.239 \text{ e}/\text{\AA}^3$ .

Table 1. lists cell information, data collection parameters, and refinement data. Final positional and equivalent isotropic thermal parameters are given in Tables 2. and 3. Anisotropic thermal parameters are in Table 4. Tables 5. and 6. list bond distances and bond angles. Figure 1. is an ORTEP<sup>vii</sup> representation of the molecule with 50% probability thermal ellipsoids displayed.

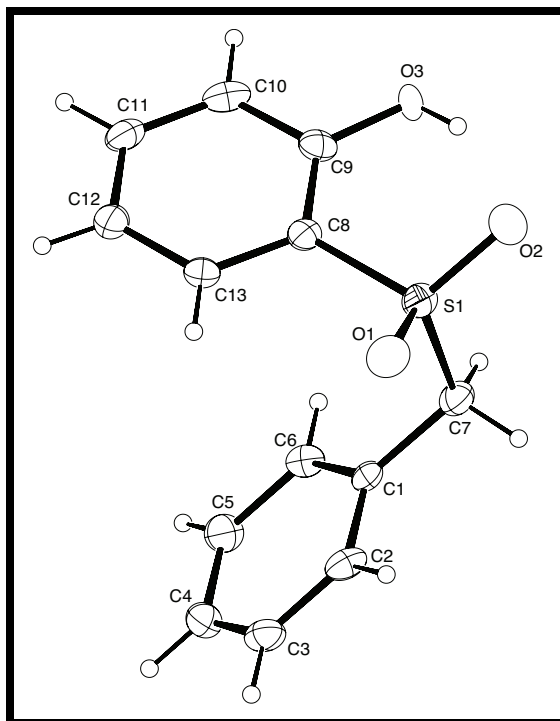

Figure 1. ORTEP drawing of the title compound with 50% probability thermal ellipsoids.

**Table 1. Summary of Structure Determination of Compound 1399**

|                                   |                                                 |
|-----------------------------------|-------------------------------------------------|
| Empirical formula                 | C <sub>13</sub> H <sub>12</sub> SO <sub>3</sub> |
| Formula weight                    | 248.29                                          |
| Temperature                       | 100(1) K                                        |
| Wavelength                        | 0.71073 Å                                       |
| Crystal system                    | orthorhombic                                    |
| Space group                       | Pna2 <sub>1</sub>                               |
| Cell constants:                   |                                                 |
| a                                 | 16.3047(8) Å                                    |
| b                                 | 12.4349(7) Å                                    |
| c                                 | 5.5879(3) Å                                     |
| Volume                            | 1132.93(10) Å <sup>3</sup>                      |
| Z                                 | 4                                               |
| Density (calculated)              | 1.456 Mg/m <sup>3</sup>                         |
| Absorption coefficient            | 0.278 mm <sup>-1</sup>                          |
| F(000)                            | 520                                             |
| Crystal size                      | 0.38 x 0.10 x 0.04 mm <sup>3</sup>              |
| Theta range for data collection   | 2.06 to 25.38°                                  |
| Index ranges                      | -19 ≤ h ≤ 17, -14 ≤ k ≤ 14, -6 ≤ l ≤ 6          |
| Reflections collected             | 1156                                            |
| Independent reflections           | 1156 [R(int) = 0.0000]                          |
| Completeness to theta = 25.38°    | 99.9 %                                          |
| Absorption correction             | Semi-empirical from equivalents                 |
| Max. and min. transmission        | 0.7452 and 0.6760                               |
| Refinement method                 | Full-matrix least-squares on F <sup>2</sup>     |
| Data / restraints / parameters    | 1156 / 1 / 166                                  |
| Goodness-of-fit on F <sup>2</sup> | 1.076                                           |
| Final R indices [I > 2σ(I)]       | R1 = 0.0293, wR2 = 0.0675                       |
| R indices (all data)              | R1 = 0.0353, wR2 = 0.0702                       |
| Absolute structure parameter      | 0.12(12)                                        |
| Largest diff. peak and hole       | 0.174 and -0.239 e.Å <sup>-3</sup>              |

**Table 2. Refined Positional Parameters for Compound 1399**

| Atom | x           | y           | z           | $U_{eq}, \text{Å}^2$ |
|------|-------------|-------------|-------------|----------------------|
| C1   | 0.53526(16) | 0.2451(2)   | 0.3362(6)   | 0.0168(6)            |
| C2   | 0.58303(16) | 0.2509(2)   | 0.1304(7)   | 0.0213(7)            |
| C3   | 0.61930(18) | 0.3466(3)   | 0.0654(6)   | 0.0230(7)            |
| C4   | 0.60801(17) | 0.4378(3)   | 0.2034(6)   | 0.0243(8)            |
| C5   | 0.56044(17) | 0.4331(3)   | 0.4066(7)   | 0.0244(8)            |
| C6   | 0.52378(16) | 0.3369(2)   | 0.4726(6)   | 0.0191(6)            |
| C7   | 0.49639(16) | 0.1405(2)   | 0.4120(6)   | 0.0210(7)            |
| C8   | 0.33789(16) | 0.2207(2)   | 0.3062(6)   | 0.0176(7)            |
| C9   | 0.28756(17) | 0.2222(2)   | 0.5085(6)   | 0.0198(7)            |
| C10  | 0.23828(17) | 0.3115(3)   | 0.5492(6)   | 0.0248(7)            |
| C11  | 0.23861(17) | 0.3958(2)   | 0.3896(6)   | 0.0227(7)            |
| C12  | 0.28695(18) | 0.3936(2)   | 0.1871(6)   | 0.0232(8)            |
| C13  | 0.33773(16) | 0.3055(2)   | 0.1442(7)   | 0.0188(6)            |
| O1   | 0.42185(13) | 0.10467(17) | 0.0041(4)   | 0.0255(6)            |
| O2   | 0.36871(12) | 0.01591(16) | 0.3698(5)   | 0.0284(6)            |
| O3   | 0.2818(2)   | 0.1438(3)   | 0.6618(9)   | 0.0199(9)            |
| O3'  | 0.3844(2)   | 0.3086(3)   | -0.0466(9)  | 0.0243(10)           |
| S1   | 0.40365(4)  | 0.11020(6)  | 0.25772(16) | 0.02043(19)          |

$U_{eq} = \frac{1}{3}[U_{11}(aa^*)^2 + U_{22}(bb^*)^2 + U_{33}(cc^*)^2 + 2U_{12}aa^*bb^*\cos\gamma + 2U_{13}aa^*cc^*\cos\beta + 2U_{23}bb^*cc^*\cos\alpha]$

**Table 3. Positional Parameters for Hydrogens in Compound 1399**

| Atom | x      | y      | z       | $U_{iso}, \text{Å}^2$ |
|------|--------|--------|---------|-----------------------|
| H2   | 0.5905 | 0.1899 | 0.0364  | 0.028                 |
| H3   | 0.6515 | 0.3499 | -0.0718 | 0.031                 |
| H4   | 0.6326 | 0.5022 | 0.1588  | 0.032                 |
| H5   | 0.5529 | 0.4944 | 0.4995  | 0.032                 |
| H6   | 0.4913 | 0.3340 | 0.6092  | 0.025                 |
| H7a  | 0.4851 | 0.1434 | 0.5824  | 0.028                 |
| H7b  | 0.5352 | 0.0826 | 0.3852  | 0.028                 |
| H9   | 0.2870 | 0.1644 | 0.6142  | 0.026                 |
| H10  | 0.2051 | 0.3143 | 0.6844  | 0.033                 |
| H11  | 0.2056 | 0.4553 | 0.4188  | 0.030                 |
| H12  | 0.2857 | 0.4507 | 0.0797  | 0.031                 |
| H13  | 0.3710 | 0.3035 | 0.0091  | 0.025                 |
| H3a  | 0.3034 | 0.0898 | 0.6063  | 0.030                 |
| H3a' | 0.4081 | 0.2508 | -0.0620 | 0.036                 |

**Table 4. Refined Thermal Parameters (U's) for Compound 1399**

| Atom | U <sub>11</sub> | U <sub>22</sub> | U <sub>33</sub> | U <sub>23</sub> | U <sub>13</sub> | U <sub>12</sub> |
|------|-----------------|-----------------|-----------------|-----------------|-----------------|-----------------|
| C1   | 0.0112(12)      | 0.0193(14)      | 0.0199(17)      | 0.0021(13)      | -0.0042(12)     | 0.0015(11)      |
| C2   | 0.0149(13)      | 0.0248(15)      | 0.0242(17)      | -0.0080(18)     | 0.0005(15)      | 0.0025(12)      |
| C3   | 0.0179(14)      | 0.0317(17)      | 0.0194(18)      | 0.0011(15)      | 0.0036(13)      | 0.0019(13)      |
| C4   | 0.0206(15)      | 0.0230(15)      | 0.029(2)        | 0.0057(14)      | -0.0014(13)     | -0.0027(12)     |
| C5   | 0.0239(14)      | 0.0181(15)      | 0.031(2)        | -0.0052(15)     | 0.0017(15)      | -0.0011(13)     |
| C6   | 0.0167(12)      | 0.0253(15)      | 0.0153(15)      | -0.0018(14)     | -0.0005(14)     | -0.0008(12)     |
| C7   | 0.0165(13)      | 0.0215(15)      | 0.0251(19)      | 0.0004(14)      | -0.0029(13)     | 0.0017(11)      |
| C8   | 0.0152(13)      | 0.0139(13)      | 0.024(2)        | -0.0038(13)     | -0.0017(12)     | -0.0026(11)     |
| C9   | 0.0178(13)      | 0.0190(15)      | 0.0227(18)      | -0.0027(14)     | 0.0004(14)      | -0.0055(12)     |
| C10  | 0.0158(13)      | 0.0341(17)      | 0.0247(18)      | -0.0071(15)     | 0.0039(14)      | -0.0010(13)     |
| C11  | 0.0144(14)      | 0.0205(15)      | 0.033(2)        | -0.0067(16)     | 0.0013(15)      | 0.0014(12)      |
| C12  | 0.0187(14)      | 0.0190(14)      | 0.032(2)        | 0.0009(15)      | -0.0001(13)     | -0.0004(12)     |
| C13  | 0.0154(13)      | 0.0201(14)      | 0.0208(16)      | -0.0002(15)     | 0.0002(15)      | -0.0028(11)     |
| O1   | 0.0277(11)      | 0.0225(12)      | 0.0264(14)      | -0.0109(11)     | 0.0000(11)      | 0.0008(9)       |
| O2   | 0.0281(10)      | 0.0158(10)      | 0.0412(15)      | -0.0013(11)     | 0.0011(12)      | -0.0037(9)      |
| O3   | 0.023(2)        | 0.0150(19)      | 0.021(2)        | 0.0087(19)      | 0.003(2)        | 0.0033(16)      |
| O3'  | 0.027(2)        | 0.021(2)        | 0.024(3)        | 0.004(2)        | 0.008(2)        | 0.0062(18)      |
| S1   | 0.0183(3)       | 0.0144(3)       | 0.0286(4)       | -0.0051(4)      | -0.0005(4)      | -0.0009(3)      |

The form of the anisotropic displacement parameter is:

$$\exp[-2\pi(a^2U_{11}h^2+b^2U_{22}k^2+c^2U_{33}l^2+2b^*c^*U_{23}kl+2a^*c^*U_{13}hl+2a^*b^*U_{12}hk)]$$

**Table 5. Bond Distances in Compound 1399, Å**

|         |          |         |          |         |          |
|---------|----------|---------|----------|---------|----------|
| C1-C6   | 1.385(4) | C1-C2   | 1.391(5) | C1-C7   | 1.508(4) |
| C2-C3   | 1.378(4) | C3-C4   | 1.384(4) | C4-C5   | 1.376(4) |
| C5-C6   | 1.388(4) | C7-S1   | 1.781(3) | C8-C13  | 1.390(4) |
| C8-C9   | 1.397(4) | C8-S1   | 1.763(3) | C9-O3   | 1.301(5) |
| C9-C10  | 1.389(4) | C10-C11 | 1.376(4) | C11-C12 | 1.379(4) |
| C12-C13 | 1.394(4) | C13-O3' | 1.311(6) | O1-S1   | 1.450(3) |
| O2-S1   | 1.446(2) |         |          |         |          |

**Table 6. Bond Angles in Compound 1399, °**

|            |            |             |            |             |            |
|------------|------------|-------------|------------|-------------|------------|
| C6-C1-C2   | 119.2(3)   | C6-C1-C7    | 120.0(3)   | C2-C1-C7    | 120.8(3)   |
| C3-C2-C1   | 120.2(3)   | C2-C3-C4    | 120.3(3)   | C5-C4-C3    | 120.0(3)   |
| C4-C5-C6   | 119.9(3)   | C1-C6-C5    | 120.4(3)   | C1-C7-S1    | 113.8(2)   |
| C13-C8-C9  | 121.0(3)   | C13-C8-S1   | 119.5(2)   | C9-C8-S1    | 119.5(2)   |
| O3-C9-C10  | 116.7(3)   | O3-C9-C8    | 124.4(3)   | C10-C9-C8   | 118.9(3)   |
| C11-C10-C9 | 120.0(3)   | C10-C11-C12 | 121.3(3)   | C11-C12-C13 | 119.7(3)   |
| O3'-C13-C8 | 123.4(3)   | O3'-C13-C12 | 117.5(3)   | C8-C13-C12  | 119.0(3)   |
| O2-S1-O1   | 117.75(15) | O2-S1-C8    | 108.98(13) | O1-S1-C8    | 108.16(15) |
| O2-S1-C7   | 107.22(15) | O1-S1-C7    | 108.04(15) | C8-S1-C7    | 106.09(14) |



---

<sup>i</sup>Bruker (2009) SAINT. Bruker AXS Inc., Madison, Wisconsin, USA.

<sup>ii</sup>Bruker (2009) SHELXTL. Bruker AXS Inc., Madison, Wisconsin, USA.

<sup>iii</sup>Sheldrick, G.M. (2007) SADABS. University of Gottingen, Germany.

<sup>iv</sup>Sheldrick, G.M. (2008) Acta Cryst. A64,112-122.

<sup>v</sup>Sheldrick, G.M. (2008) Acta Cryst. A64,112-122.

<sup>vi</sup> $R1 = \sum |F_o| - |F_c| / \sum |F_o|$

$wR2 = [\sum w(F_o^2 - F_c^2)^2 / \sum w(F_o^2)]^{1/2}$

$GOF = [\sum w(F_o^2 - F_c^2)^2 / (n - p)]^{1/2}$

where n = the number of reflections and p = the number of parameters refined.

<sup>vii</sup>“ORTEP-II: A Fortran Thermal Ellipsoid Plot Program for Crystal Structure Illustrations”. C.K. Johnson (1976) ORNL-5138.
